# Supplementary material for: UPRER–immunity axis acts as physiological food evaluation system that promotes aversion behavior in sensing low-quality food
Source: eLife journal article supplement (doi:10.7554/elife.94181), 2024-01-23

# Figure 2—source data 2

## Figure 2E

Raw unedited gels

Cropped and labelled gels

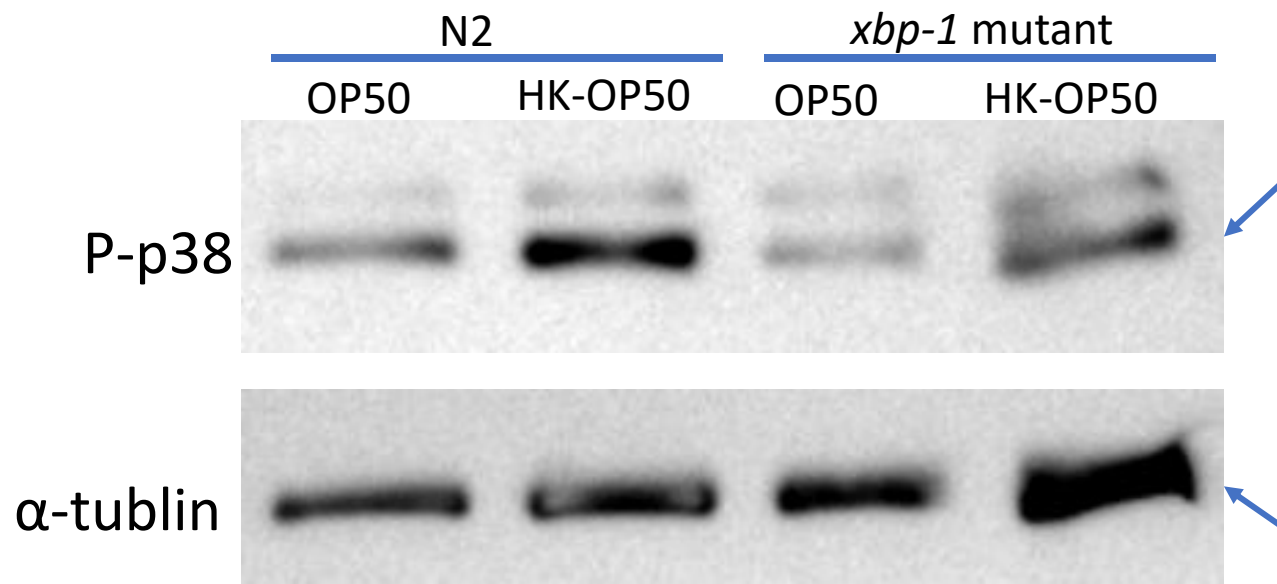

|                          | N2          |            | <i>xbp-1</i> mutant |             |
|--------------------------|-------------|------------|---------------------|-------------|
|                          | OP50        | HK-OP50    | OP50                | HK-OP50     |
| P-p38/ $\alpha$ -tubulin | 0.877273326 | 1.25248011 | 0.65965464          | 0.868754749 |
| Relative band intensity  | 0.700428948 | 1          | 0.526678736         | 0.693627581 |

Relative band intensity

0.700428948

1

0.526678736

0.693627581

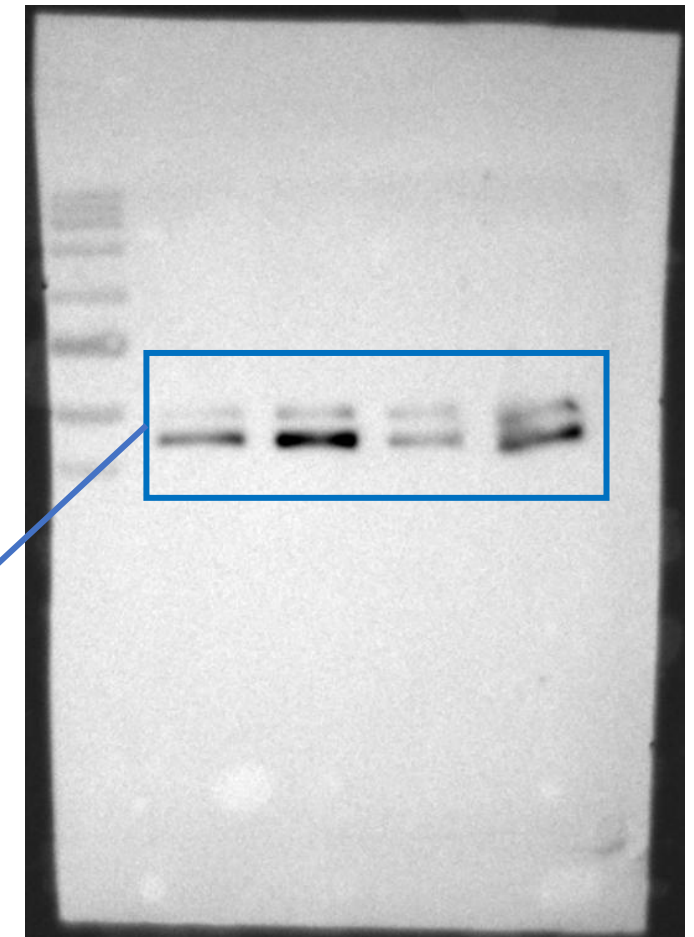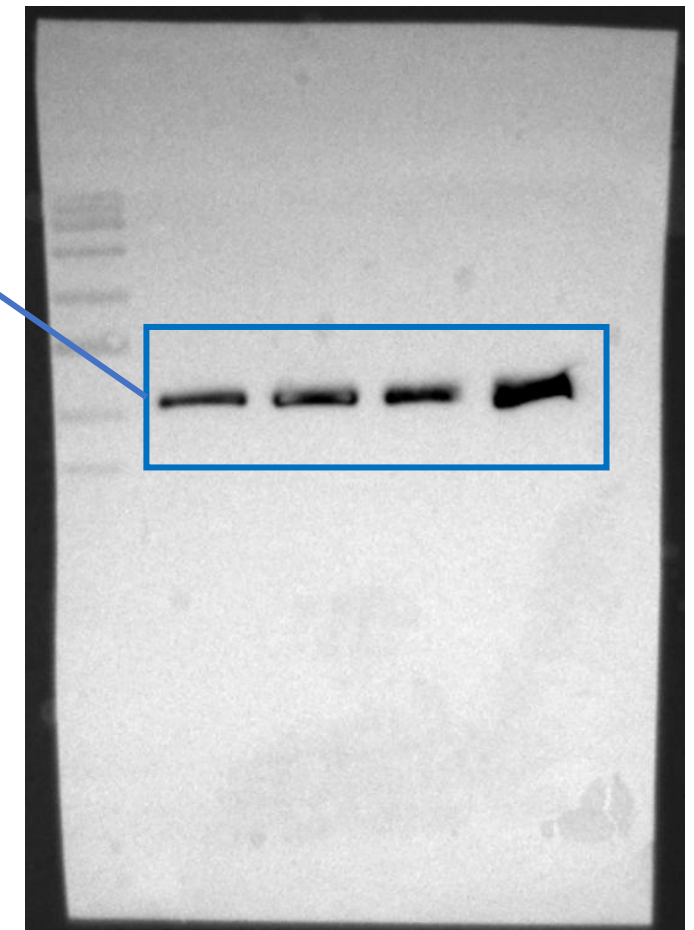

Supplement: fig2-data2 [file elife-94181-fig2-data2-v1.pdf]
