# Supplementary material for: UPRER–immunity axis acts as physiological food evaluation system that promotes aversion behavior in sensing low-quality food
Source: eLife journal article supplement (doi:10.7554/elife.94181), 2024-01-23

# Figure 3—source data 2

## Figure 3G

### Cropped and labelled gels

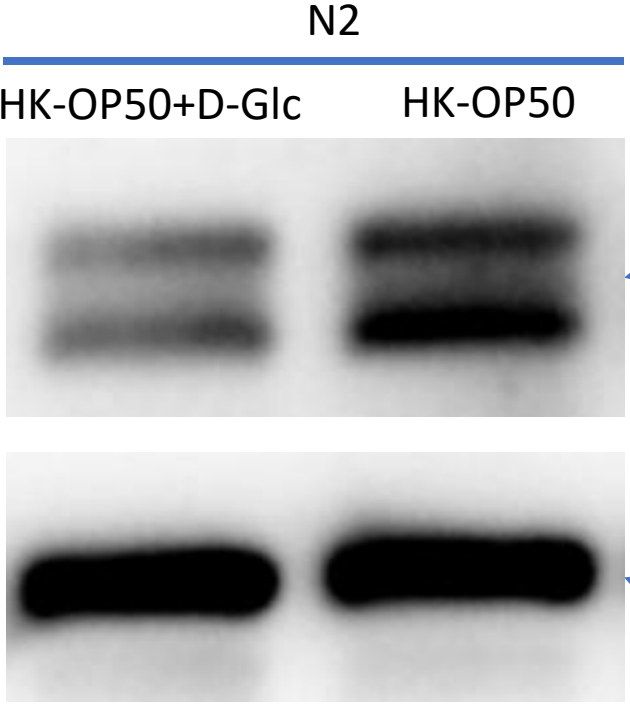

P-p38/ $\alpha$ -tubulin 0.674390932 1.131231591

Relative band intensity 0.60 1

### Raw unedited gels

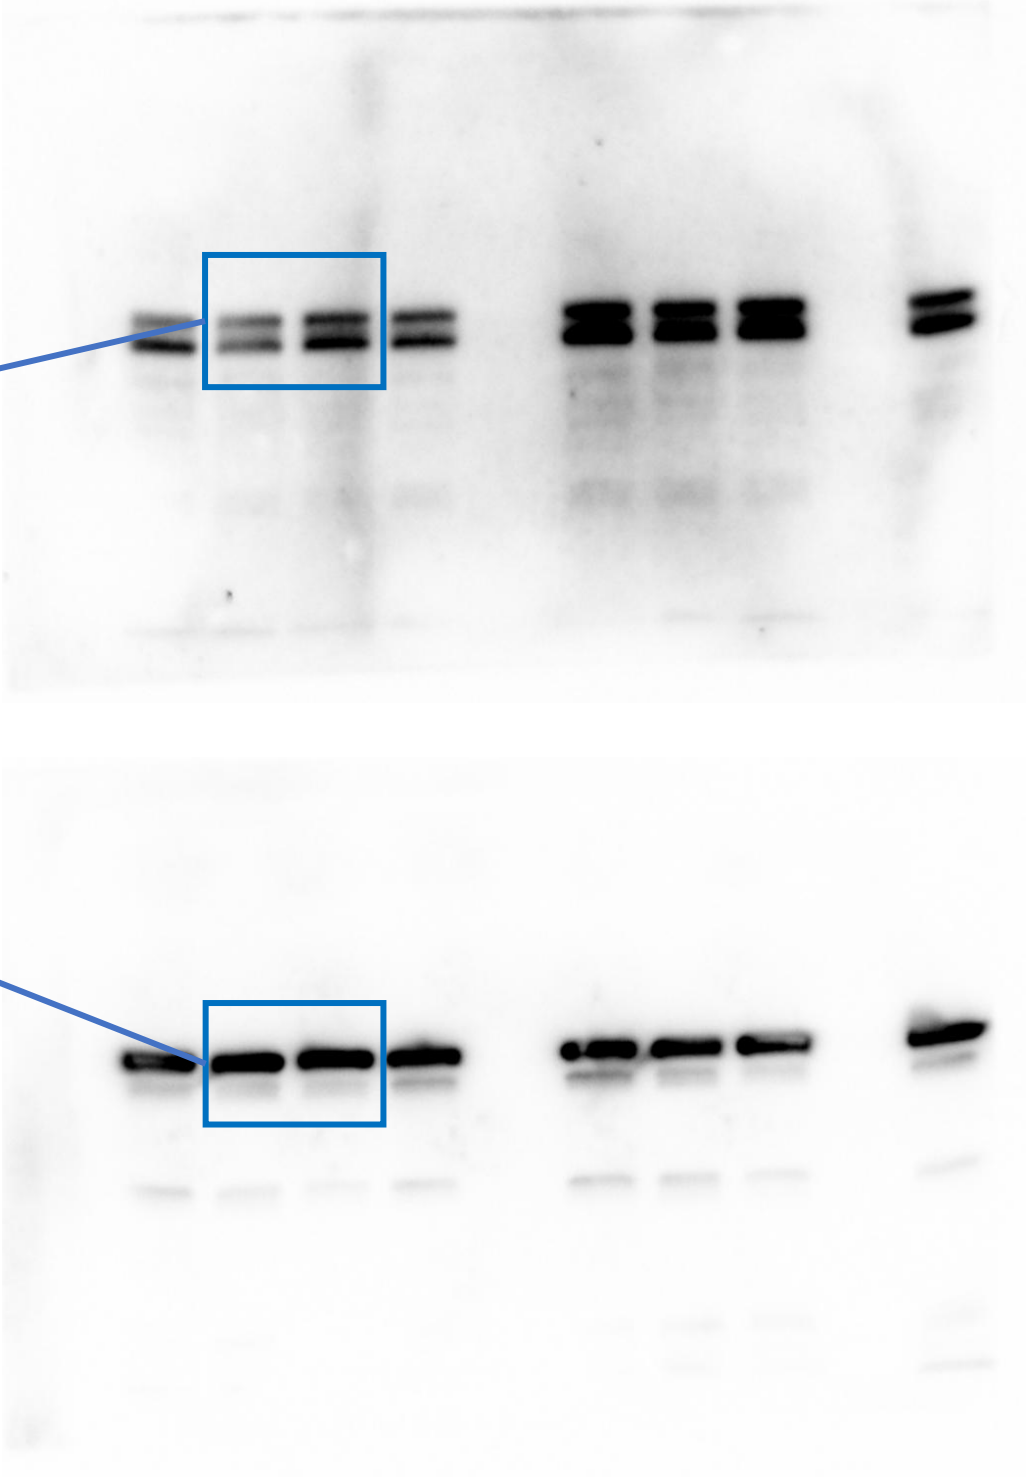

Supplement: fig3-data2 [file elife-94181-fig3-data2-v1.pdf]
