# Supplementary material for: UPRER–immunity axis acts as physiological food evaluation system that promotes aversion behavior in sensing low-quality food
Source: eLife journal article supplement (doi:10.7554/elife.94181), 2024-01-23

# Figure 4—source data 2

## Figure 4F

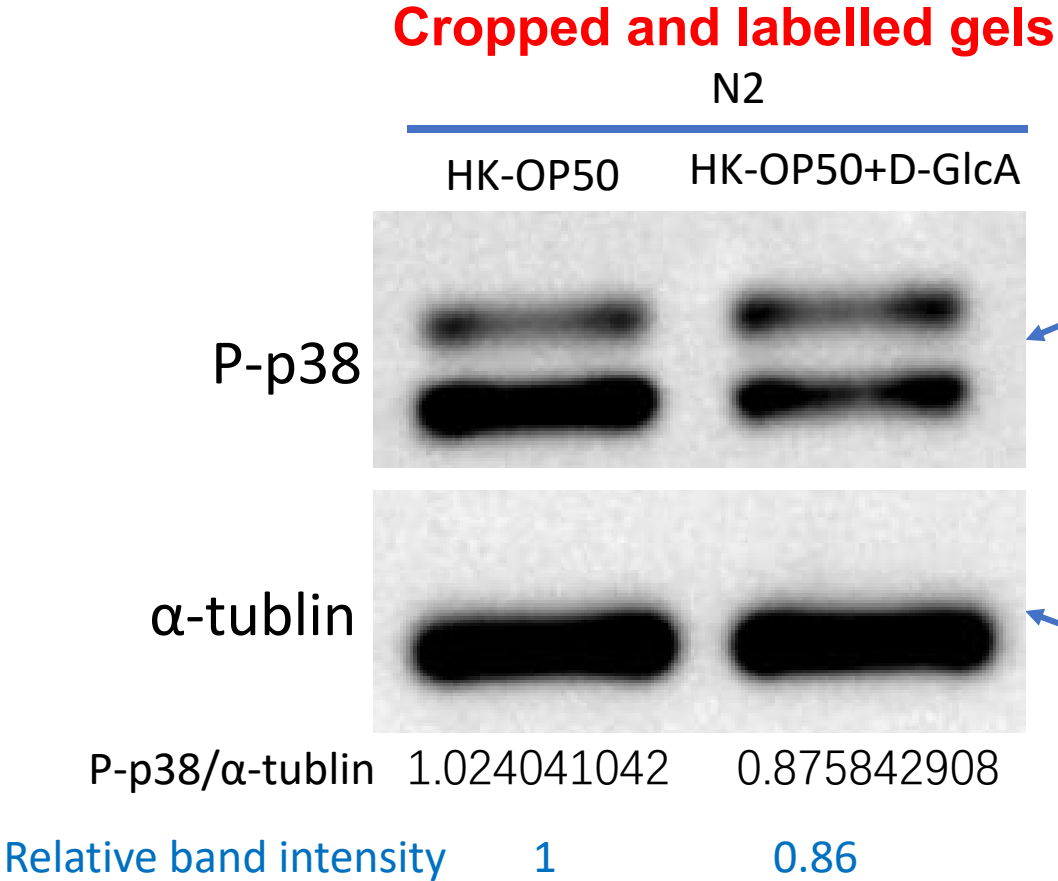

**Raw unedited gels**

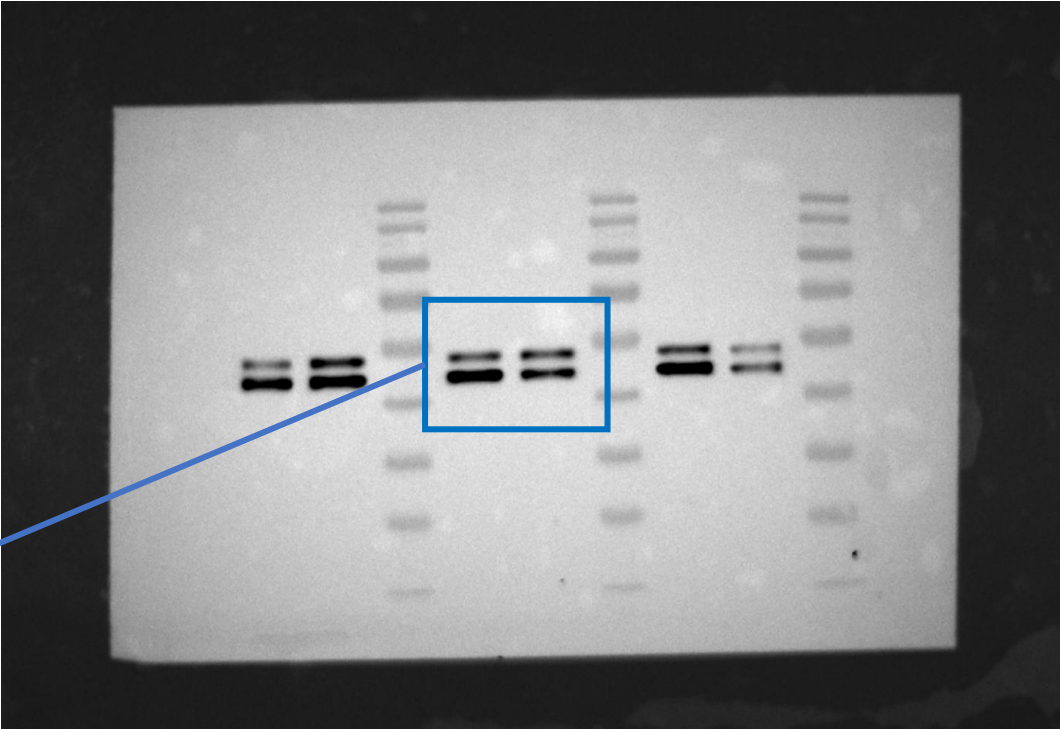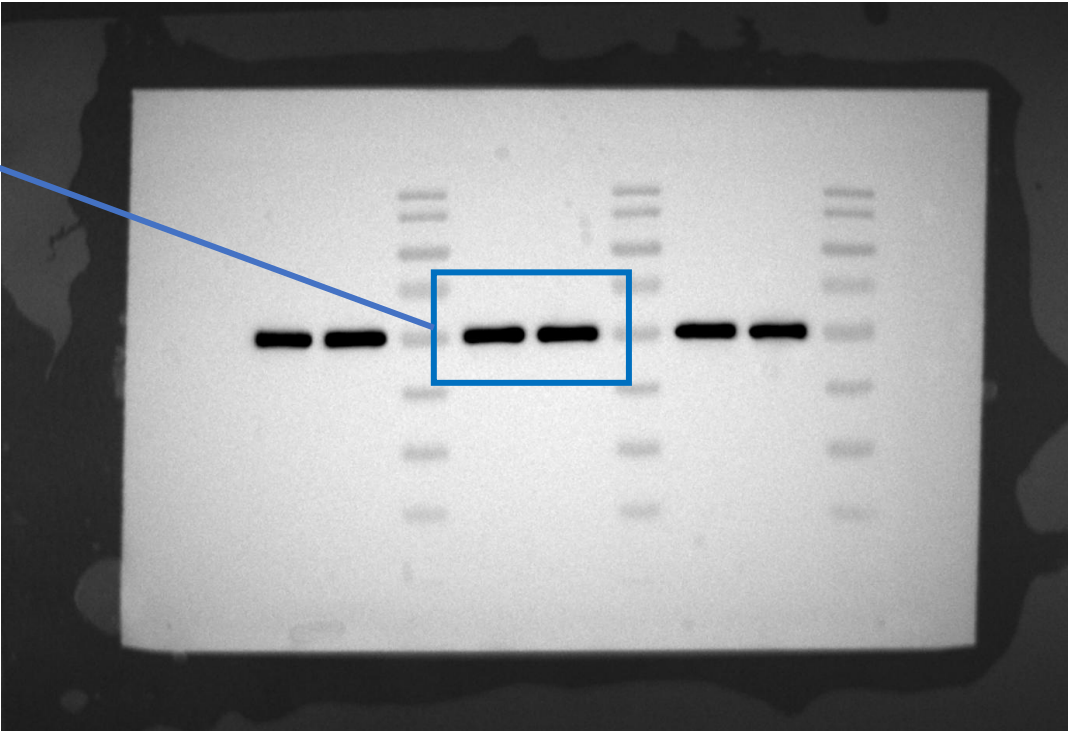

# Figure 4—source data 2

## Figure 4G

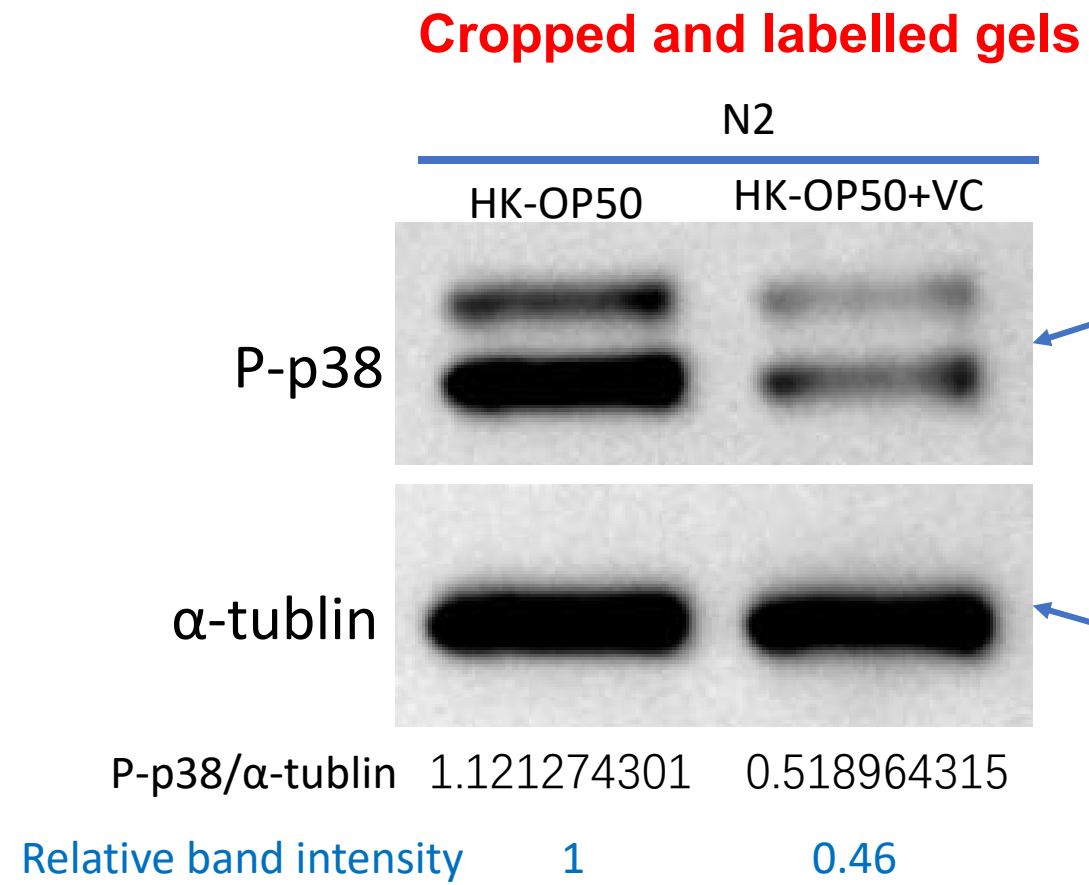

**Raw unedited gels**

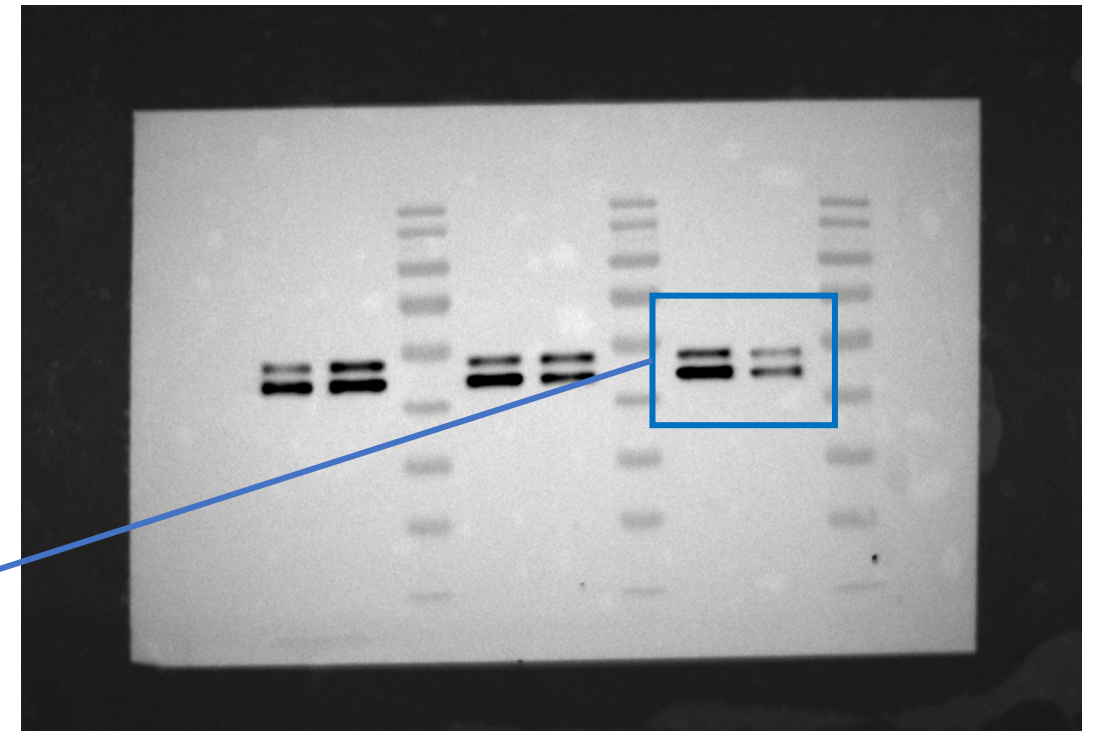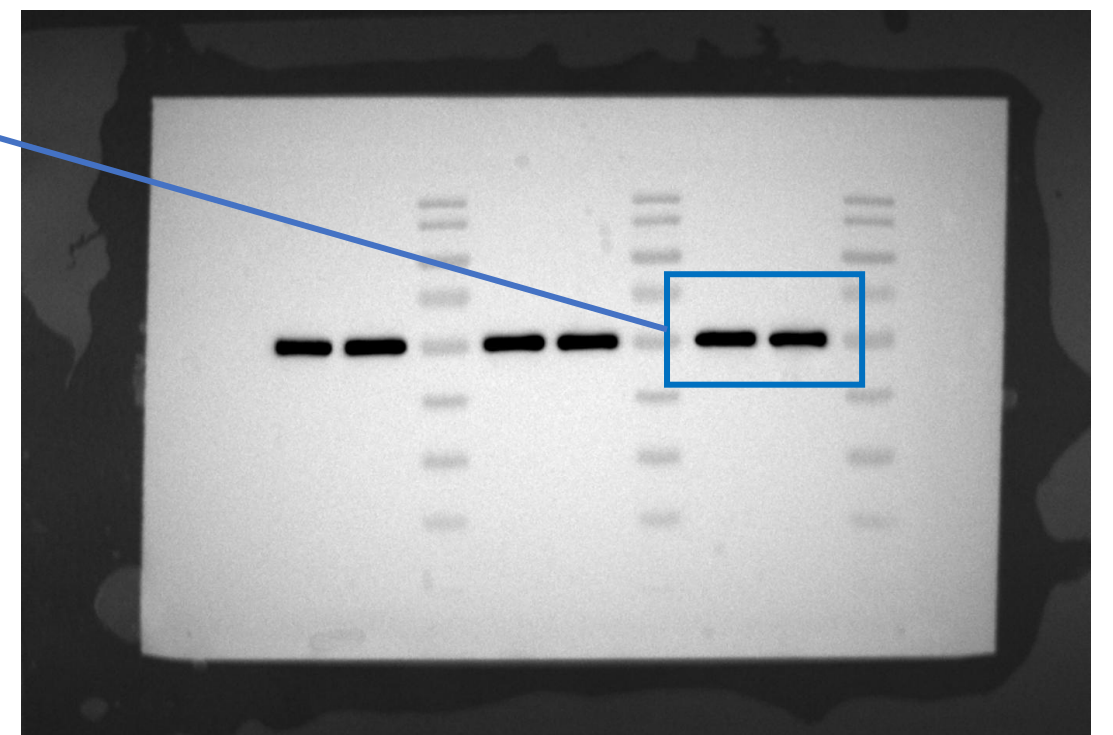

Supplement: fig4-data2 [file elife-94181-fig4-data2-v1.pdf]
