# Supplementary material for: UPRER–immunity axis acts as physiological food evaluation system that promotes aversion behavior in sensing low-quality food
Source: eLife journal article supplement (doi:10.7554/elife.94181), 2024-01-23

# Figure 5—source data 2

## Figure 5-figure supplement 1-D

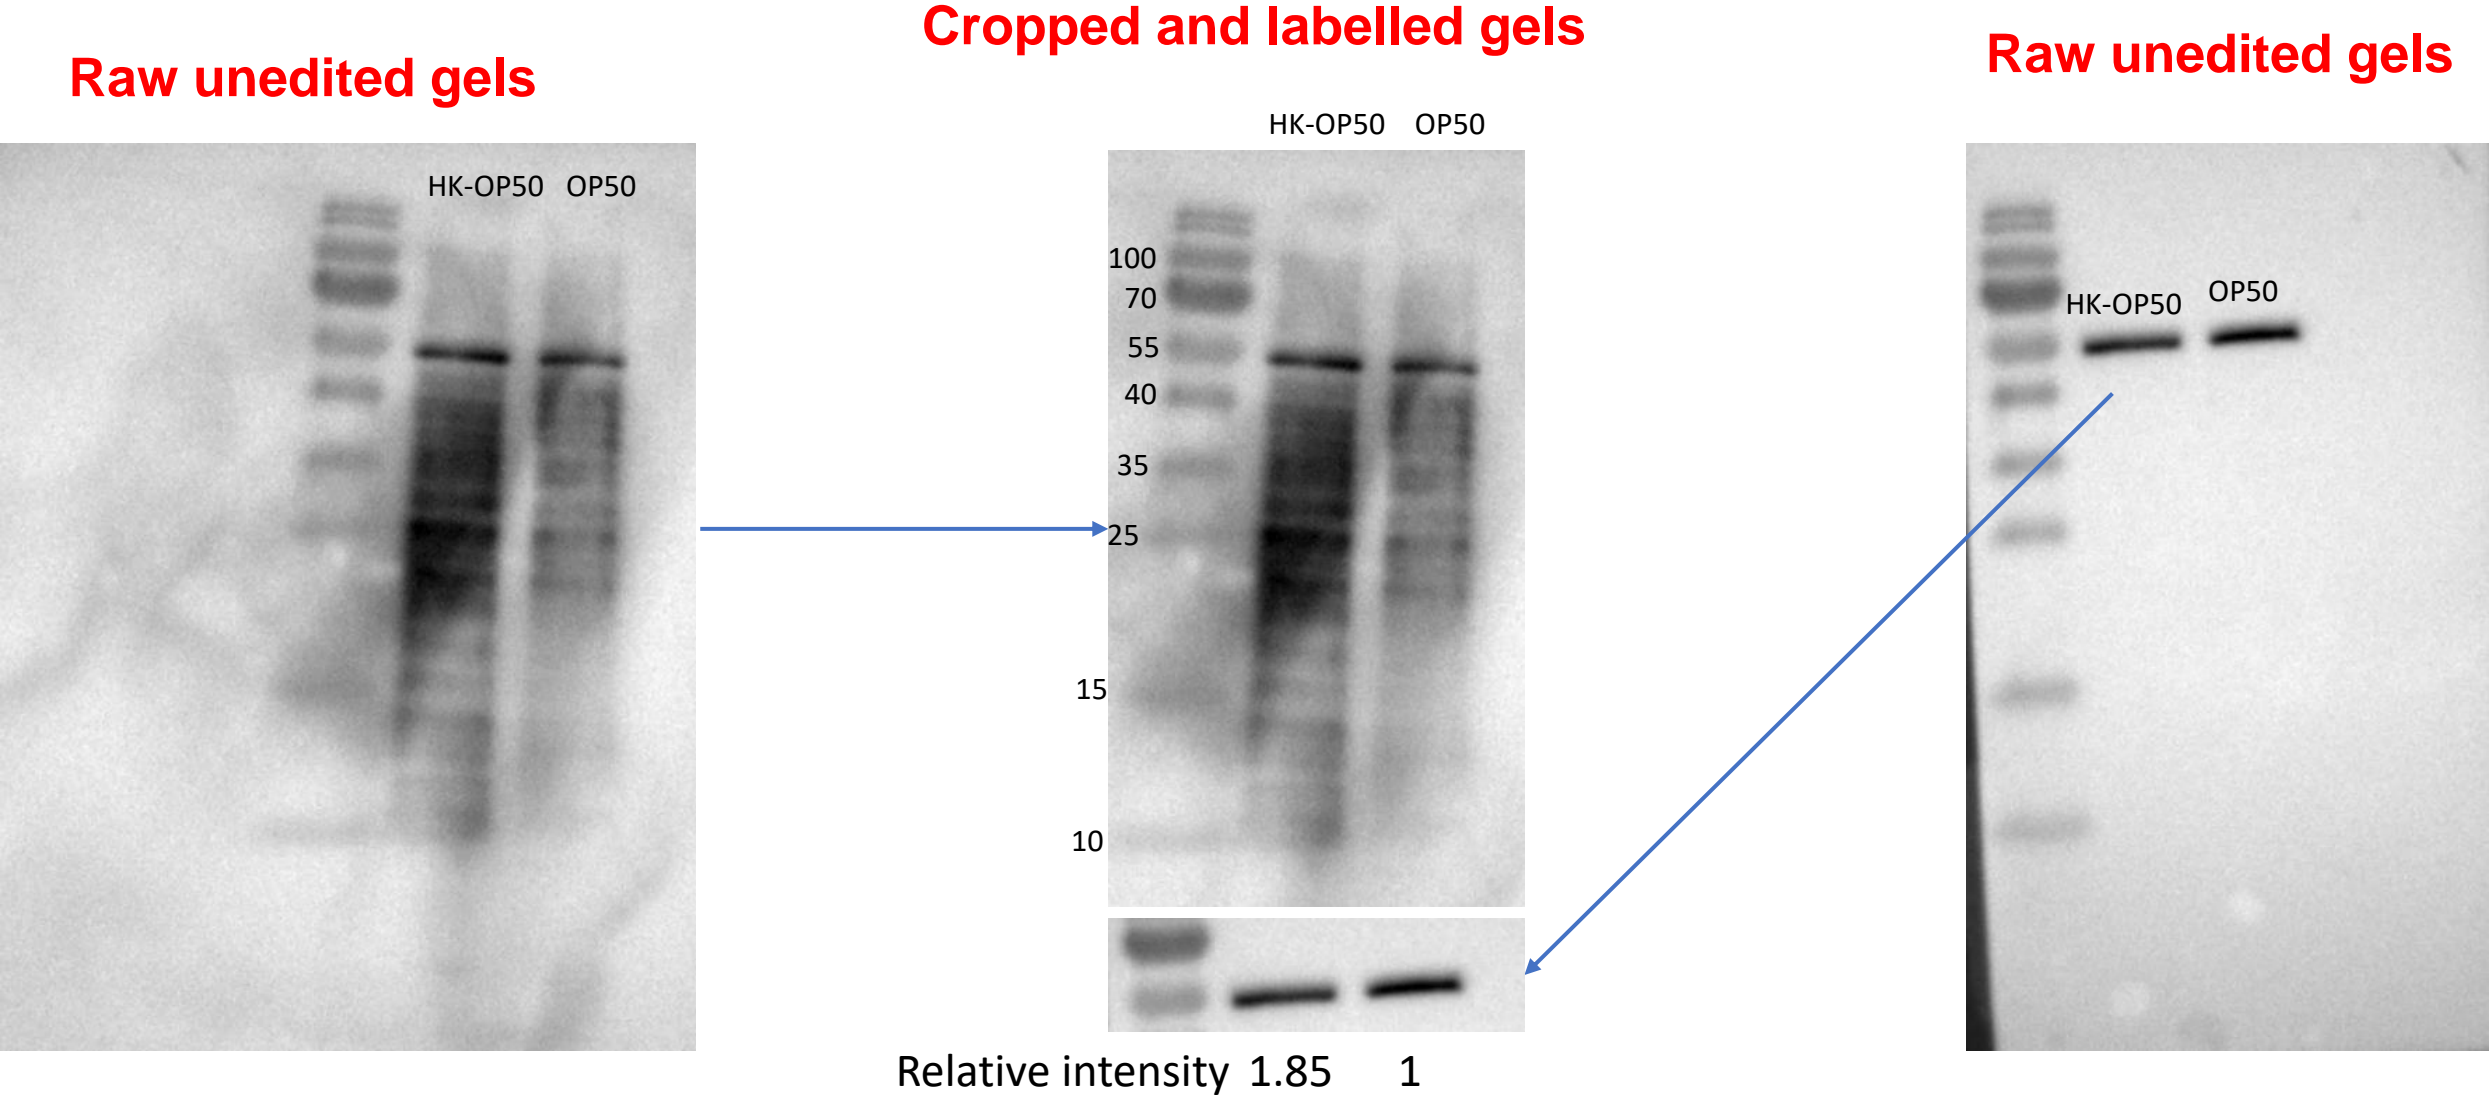

Supplement: fig5-figsupp1-data1 [file elife-94181-fig5-figsupp1-data1-v1.pdf]
