# Supplementary material for: UPRER–immunity axis acts as physiological food evaluation system that promotes aversion behavior in sensing low-quality food
Source: eLife. 2024 Sep 5;13:RP94181. doi: 10.7554/eLife.94181 (PMC11377039; doi:10.7554/eLife.94181)
Supplement: Figure 1—source data 1. [file elife-94181-fig1-data1.xlsx]

## Sheet: Figure 1A
	Live-OP50			HK-OP50
	worm number		aversion index	worm number		aversion index
replicate	out lawn	in lawn	out/(in+out)	out lawn	in lawn	out/(in+out)
1	1	126	0.00787402	30	49	0.379747
2	2	118	0.0166667	44	66	0.4
3	0	129	0	40	67	0.373832
t` test	P value	P value summary	Significantly different (P < 0.05)?
HK-OP50 vs. Live-OP50	<0.0001	****	Yes

## Sheet: Figure 1B
		Worn number in Lawn			Selection index
	Replicate	HK-OP50	OP50	LB	HK-OP50/(HK-OP50+OP50+LB)	OP50/(HK-OP50+OP50+LB)	LB/(HK-OP50+OP50+LB)
1h	1	100	38	16	0.649351	0.246753	0.103896
	2	28	121	13	0.17284	0.746914	0.0802469
	3	91	88	16	0.466667	0.451282	0.0820513
	4	48	68	31	0.326531	0.462585	0.210884
	5	86	171	21	0.309353	0.615108	0.0755396
	6	31	75	17	0.252033	0.609756	0.138211
	7	70	86	17	0.404624	0.49711	0.0982659
	8	49	97	6	0.322368	0.638158	0.0394737
2h	1	147	100	25	0.540441	0.367647	0.0919118
	2	86	194	7	0.299652	0.675958	0.0243902
	3	153	176	8	0.454006	0.522255	0.0237389
	4	94	150	24	0.350746	0.559701	0.0895522
	5	110	239	9	0.307263	0.667598	0.0251397
	6	56	127	21	0.27451	0.622549	0.102941
	7	70	131	16	0.322581	0.603687	0.0737327
	8	60	143	9	0.283019	0.674528	0.0424528
4h	1	109	184	16	0.352751	0.595469	0.0517799
	2	59	333	6	0.148241	0.836683	0.0150754
	3	99	298	13	0.241463	0.726829	0.0317073
	4	88	254	21	0.242424	0.699725	0.0578512
	5	94	326	21	0.213152	0.739229	0.047619
	6	81	200	15	0.273649	0.675676	0.0506757
	7	68	248	14	0.206061	0.751515	0.0424242
	8	73	249	10	0.21988	0.75	0.0301205
17h	1	22	439	2	0.0475162	0.948164	0.00431965
	2	9	487	1	0.0181087	0.979879	0.00201207
	3	16	585	5	0.0264026	0.965347	0.00825083
	4	30	523	3	0.0539568	0.940647	0.00539568
	5	31	758	3	0.0391414	0.957071	0.00378788
	6	1	270	2	0.003663	0.989011	0.00732601
	7	18	491	1	0.0352941	0.962745	0.00196078
	8	14	493	2	0.0275049	0.968566	0.00392927
Tukey's multiple comparisons test	Mean Diff.	95.00% CI of diff.	Significant?	Summary	Adjusted P Value
1h:HK-OP50 vs. 1h:OP50	-0.1705	-0.6442 to 0.3032	No	ns	0.8522
1h:HK-OP50 vs. 1h:LB	0.2594	0.008393 to 0.5104	Yes	*	0.0425
1h:OP50 vs. 1h:LB	0.4299	0.1467 to 0.7130	Yes	**	0.0051
1h:OP50 vs. 2h:OP50	-0.05328	-0.1532 to 0.04659	No	ns	0.4836
1h:OP50 vs. 4h:OP50	-0.1884	-0.3546 to -0.02228	Yes	*	0.0265
1h:OP50 vs. 17h:OP50	-0.4305	-0.6606 to -0.2004	Yes	**	0.0014
2h:HK-OP50 vs. 2h:OP50	-0.2327	-0.5484 to 0.08295	No	ns	0.1853
2h:HK-OP50 vs. 4h:HK-OP50	0.1168	0.007609 to 0.2260	Yes	*	0.0358
2h:HK-OP50 vs. 17h:HK-OP50	0.3226	0.1816 to 0.4635	Yes	***	0.0004
2h:OP50 vs. 4h:OP50	-0.1352	-0.2379 to -0.03243	Yes	*	0.0118
2h:OP50 vs. 17h:OP50	-0.3772	-0.5335 to -0.2209	Yes	***	0.0003
4h:HK-OP50 vs. 4h:OP50	-0.4847	-0.6909 to -0.2785	Yes	***	0.0003
4h:HK-OP50 vs. 17h:HK-OP50	0.2058	0.1145 to 0.2970	Yes	***	0.0004
4h:OP50 vs. 17h:OP50	-0.242	-0.3459 to -0.1382	Yes	***	0.0004
17h:HK-OP50 vs. 17h:OP50	-0.9325	-0.9837 to -0.8812	Yes	****	<0.0001

## Sheet: Figure 1F
original fluorescence	OP50	HK-OP50		relative fluorescence intensity	HK-OP50	OP50
	n=31	n=30			n=30	n=31
	19.805	32.247			0.654735	0.402116
	21.221	31.934			0.64838	0.430866
	21.175	46.174			0.937505	0.429932
	23.271	46.648			0.947129	0.472488
	20.337	22.163			0.449992	0.412917
	18.747	30.975			0.628908	0.380634
	19.265	26.487			0.537785	0.391152
	20.792	37.809			0.767664	0.422155
	20.03	35.774			0.726346	0.406684
	19.832	71.15			1.44461	0.402664
	26.284	57.841			1.17439	0.533664
	18.877	53.492			1.08609	0.383274
	19.836	25.631			0.520405	0.402745
	19.636	46.352			0.941119	0.398684
	18.719	23.911			0.485483	0.380066
	22.155	38.137			0.774324	0.449829
	19.493	68.148			1.38366	0.395781
	18.706	61.949			1.2578	0.379802
	19.898	52.382			1.06355	0.404004
	19.239	24.103			0.489381	0.390624
	20.631	63.004			1.27922	0.418887
	20.582	91.764			1.86315	0.417892
	19.177	50.915			1.03377	0.389365
	19.079	55.525			1.12737	0.387375
	20.835	42.271			0.85826	0.423029
	20.656	42.229			0.857407	0.419394
	19.141	70.22			1.42573	0.388634
	18.473	73.792			1.49825	0.375071
	18.106	78.185			1.58745	0.36762
	19.325	76.348			1.55015	0.39237
	19.108					0.387964
	Avergage:				t` test	P value	P value summary	Significantly different (P < 0.05)?
	20.0784	49.252			HK-OP50 vs. OP50	<0.0001	****	Yes

## Sheet: Figure 1G
n: Worm number
original fluorescence	OP50	HK-OP50		relative fluorescence intensity	HK-OP50	OP50
	n=23	n=21			n=21	n=23
	29.437	61.056			1.01967	0.491615
	41.821	39.466			0.659105	0.698435
	47.573	63.107			1.05392	0.794496
	45.985	57.752			0.964491	0.767976
	43.198	86.08			1.43759	0.721431
	51.159	52.874			0.883026	0.854385
	44.373	86.784			1.44934	0.741054
	53.118	45.516			0.760143	0.887101
	40.631	47.914			0.800191	0.678561
	41.519	61.802			1.03213	0.693391
	47.969	31.578			0.527371	0.80111
	50.098	39.933			0.666904	0.836665
	31.661	43.375			0.724387	0.528757
	45.556	79.196			1.32262	0.760811
	58.534	57.543			0.961001	0.977551
	38.22	50.265			0.839454	0.638296
	40.462	73.274			1.22372	0.675739
	30.258	58.803			0.982044	0.505326
	30.202	109.766			1.83315	0.504391
	51.765	62.078			1.03674	0.864505
	38.062	49.28			0.823004	0.635657
	46.093					0.769779
	48.647					0.812433
	Average：			t` test	P value	P value summary	Significantly different (P < 0.05)?
	43.3192	59.8782		HK-OP50 vs. OP50	0.0003	***	Yes

## Sheet: Figure 1-figure supplement 1G
		Worm number in Lawn						Tukey's multiple comparisons test	Mean Diff.	95.00% CI of diff.	Significant?	Summary	Adjusted P Value
	replicate	1h	2h	4h	17h
HK	1	100	147	109	22			1h:HK vs. 1h:OP50	-30.13	-110.2 to 49.95	No	ns	0.8219
	2	28	86	59	9			1h:HK vs. 1h:LB	45.75	0.5605 to 90.94	Yes	*	0.0471
	3	91	153	99	16			2h:HK vs. 2h:OP50	-60.5	-147.6 to 26.61	No	ns	0.2291
	4	48	94	88	30			2h:HK vs. 2h:LB	82.13	21.24 to 143.0	Yes	*	0.0102
	5	86	110	94	31			4h:HK vs. 4h:OP50	-177.6	-277.1 to -78.11	Yes	**	0.0019
	6	31	56	81	1			4h:HK vs. 4h:LB	69.38	46.56 to 92.19	Yes	****	<0.0001
	7	70	70	68	18			17h:HK vs. 17h:OP50	-488.1	-696.1 to -280.2	Yes	***	0.0003
	8	49	60	73	14			17h:HK vs. 17h:LB	15.25	-0.4977 to 31.00	No	ns	0.0583
OP50	1	38	100	184	439
	2	121	194	333	487
	3	88	176	298	585
	4	68	150	254	523
	5	171	239	326	758
	6	75	127	200	270
	7	86	131	248	491
	8	97	143	249	493
LB	1	16	25	16	2
	2	13	7	6	1
	3	16	8	13	5
	4	31	24	21	3
	5	21	9	21	3
	6	17	21	15	2
	7	17	16	14	1
	8	6	9	10	2
