# Supplementary material for: UPRER–immunity axis acts as physiological food evaluation system that promotes aversion behavior in sensing low-quality food
Source: eLife. 2024 Sep 5;13:RP94181. doi: 10.7554/eLife.94181 (PMC11377039; doi:10.7554/eLife.94181)
Supplement: Figure 2—source data 1. [file elife-94181-fig2-data1.xlsx]

## Sheet: Figure 2A
Original fluorenscence	EV	ire-1	xbp-1		relative fluorenscence intensity	EV	ire-1	xbp-1
	n=27	n=31	n=20			n=27	n=31	n=20
	25.461	6.735	5.263			1.2533	0.331526	0.259068
	27.014	9.928	5.269			1.32975	0.488699	0.259363
	23.603	8.295	3.762			1.16184	0.408316	0.185182
	13.697	5.657	5.501			0.674226	0.278462	0.270783
	18.671	5.338	5.159			0.919068	0.26276	0.253948
	40.083	11.03	5.28			1.97306	0.542945	0.259905
	10.125	5.572	5.221			0.498397	0.274278	0.257
	30.978	5.581	5.454			1.52487	0.274721	0.26847
	24.513	6.422	5.982			1.20664	0.316119	0.29446
	19.449	8.6	5.469			0.957364	0.423329	0.269208
	10.601	27.751	5.745			0.521827	1.36602	0.282794
	10.295	30.341	4.858			0.506765	1.49352	0.239132
	22.802	6.29	5.156			1.12241	0.309621	0.253801
	17.08	11.088	5.227			0.840752	0.5458	0.257296
	10.998	6.349	5.308			0.541369	0.312525	0.261283
	36.82	13.885	4.718			1.81244	0.68348	0.23224
	17.629	9.652	6.486			0.867776	0.475113	0.319269
	40.936	24.159	4.736			2.01505	1.18921	0.233127
	14.86	9.23	5.87			0.731474	0.454341	0.288947
	28.287	12.228	5.375			1.39241	0.601915	0.264581
	18.781	5.235				0.924483	0.257689
	8.428	5.176				0.414863	0.254785
	26.479	5.995				1.30341	0.2951
	11.192	8.243				0.550919	0.405756
	15.066	27.57				0.741614	1.35712
	14.888	16.401				0.732852	0.807329
	9.773	5.95				0.48107	0.292885
		12.48					0.61432
		11.756					0.578681
		9.422					0.463792
		4.826					0.237557
	average：
	20.3151	10.8769	5.29195
Dunnett's multiple comparisons test	Mean Diff.	95.00% CI of diff.	Significant?	Summary	Adjusted P Value
EV vs. ire-1	0.4646	0.2558 to 0.6734	Yes	****	<0.0001
EV vs. xbp-1	0.7395	0.5055 to 0.9735	Yes	****	<0.0001

## Sheet: Figure 2B
Original fluorenscence	Wild Type (zcls4)	xbp-1 mutant (zcls4; zc12)		relative fluorenscence intensity	Wild Type (zcls4)	xbp-1 mutant (zcls4; zc12)
	n=30	n=24			n=30	n=24
	38.532	10.032			1.55983	0.406109
	28.479	7.826			1.15287	0.316807
	35.269	7.401			1.42774	0.299603
	24.363	11.136			0.986248	0.450801
	24.926	11.193			1.00904	0.453108
	18.752	10.944			0.759107	0.443028
	26.717	10.968			1.08154	0.444
	27.798	10.991			1.1253	0.444931
	12.76	10.295			0.516543	0.416756
	14.166	11.702			0.57346	0.473713
	25.077	11.821			1.01515	0.478531
	15.348	11.919			0.621309	0.482498
	19.878	12.354			0.804689	0.500107
	25.918	13.439			1.0492	0.54403
	33.019	12.804			1.33666	0.518324
	12.853	12.816			0.520307	0.51881
	27.315	12.94			1.10575	0.523829
	31.418	14.157			1.27184	0.573095
	34.569	14.598			1.3994	0.590948
	26.439	11.77			1.07029	0.476466
	18.699	11.129			0.756962	0.450518
	32.02	9.93			1.29621	0.40198
	13.663	10.614			0.553097	0.42967
	27.452	10.857			1.1113	0.439507
	22.475				0.90982
	14.658				0.593376
	16.211				0.656244
	34.144				1.3822
	26.237				1.06211
	31.926				1.29241
	average:
	24.7027	11.4015
t` test	P value	P value summary	Significantly different (P < 0.05)?
zc12 (xbp-1) vs. zcIs4 (WT)	<0.0001	****	Yes

## Sheet: Figure 2C
	N2			xbp-1(zc12)			xbp-1(tm2484)			xbp-1(tm2484); ges-1p:xbp-1			xbp-1(tm2484); rgef-1p:xbp-1
	worm number		aversion index	worm number		aversion index	worm number		aversion index	worm number		aversion index	worm number		aversion index
replicate	in lawn	out plawn	out/(in+out)	in lawn	out plawn	out/(in+out)	in lawn	out plawn	out/(in+out)	in lawn	out plawn	out/(in+out)	in lawn	out plawn	out/(in+out)
1	450	313	0.410223	155	50	0.243902	321	98	0.23389	135	51	0.274194	238	135	0.36193
2	385	233	0.377023	149	59	0.283654	338	98	0.224771	137	53	0.278947	253	136	0.349614
3	413	283	0.406609	193	56	0.2249	306	82	0.21134	138	49	0.262032	193	123	0.389241
4	340	260	0.433333	156	62	0.284404	277	99	0.263298	117	39	0.25	214	112	0.343558
5	347	205	0.371377	149	63	0.29717	274	75	0.2149	126	35	0.217391	189	102	0.350515
Tukey's multiple comparisons test	Mean Diff.	95.00% CI of diff.	Significant?	Summary	Adjusted P Value
N2 vs. xbp-1(zc12)	0.1329	0.08680 to 0.1790	Yes	****	<0.0001
N2 vs. xbp-1(tm2484)	0.1701	0.1240 to 0.2162	Yes	****	<0.0001
N2 vs. xbp-1(tm2484); ges-1p::xbp-1	0.1432	0.09709 to 0.1893	Yes	****	<0.0001
N2 vs. xbp-1(tm2484); rgef-1p::xbp-1	0.04074	-0.005365 to 0.08685	No	ns	0.0996
xbp-1(zc12) vs. xbp-1(tm2484)	0.03717	-0.008940 to 0.08327	No	ns	0.1528
xbp-1(zc12) vs. xbp-1(tm2484); ges-1p::xbp-1	0.01029	-0.03581 to 0.05640	No	ns	0.961
xbp-1(zc12) vs. xbp-1(tm2484); rgef-1p::xbp-1	-0.09217	-0.1383 to -0.04606	Yes	****	<0.0001
xbp-1(tm2484) vs. xbp-1(tm2484); ges-1p::xbp-1	-0.02687	-0.07298 to 0.01923	No	ns	0.4313
xbp-1(tm2484) vs. xbp-1(tm2484); rgef-1p::xbp-1	-0.1293	-0.1754 to -0.08323	Yes	****	<0.0001
xbp-1(tm2484); ges-1p::xbp-1 vs. xbp-1(tm2484); rgef-1p::xbp-1	-0.1025	-0.1486 to -0.05635	Yes	****	<0.0001

## Sheet: Figure 2D
Original fluorenscence	EV	pmk-1		relative fluorenscence intensity	EV	pmk-1
	n=22	n=45			n=22	n=45
	15.959	17.166			0.60236	0.647917
	30.438	18.477			1.14886	0.6974
	21.992	21.613			0.83007	0.815765
	22.24	19.866			0.839431	0.749826
	30.638	17.53			1.15641	0.661656
	16.274	17.022			0.614249	0.642482
	39.445	19.098			1.48882	0.720839
	28.126	15.88			1.06159	0.599378
	30.808	15.464			1.16282	0.583676
	34.135	15.969			1.2884	0.602737
	21.483	15.366			0.810859	0.579977
	25.038	15.122			0.945039	0.570768
	21.266	15.468			0.802668	0.583827
	23.896	15.04			0.901935	0.567673
	36.465	15.416			1.37634	0.581865
	47.328	17.124			1.78636	0.646332
	16.664	17.455			0.628969	0.658825
	31.417	16.977			1.18581	0.640783
	22.897	19.096			0.864229	0.720763
	23.703	16.821			0.894651	0.634895
	23.001	17.694			0.868154	0.667846
	19.658	17.307			0.741975	0.653239
		17.857				0.673998
		17.101				0.645464
		18.222				0.687775
		17.316				0.653579
		17.17				0.648068
		17.771				0.670752
		18.459				0.69672
		18.396				0.694342
		18.198				0.686869
		17.061				0.643954
		18.401				0.694531
		18.744				0.707477
		17.285				0.652409
		17.912				0.676074
		17.032				0.642859
		16.789				0.633687
		24.11				0.910013
		16.021				0.6047
		14.546				0.549027
		15.551				0.58696
		18.16				0.685435
		15.588				0.588357
		15.669				0.591414
	average:
	26.4941	17.3407
t` test	P value	P value summary	Significantly different (P < 0.05)?
pmk-1 vs. EV	<0.0001	****	Yes

## Sheet: Figure 2F
	wild type (N2)			pmk-1(km25)			pmk-1(km25); vha-6p::pmk-1			km25;rgef-1:pmk-1
	worm number		aversion index	worm number		aversion index	worm number		aversion index	worm number		aversion index
replicate	in lawn	out plawn	out/(in+out)	in lawn	out plawn	out/(in+out)	in lawn	out plawn	out/(in+out)	in lawn	out plawn	out/(in+out)
1	96	72	0.428571	138	86	0.383929	241	160	0.399002	250	242	0.49187
2	107	118	0.524444	214	144	0.402235	214	101	0.320635	229	223	0.493363
3	103	91	0.469072	167	121	0.420139	266	160	0.375587	249	218	0.466809
4	111	74	0.4	234	126	0.35	264	123	0.317829	193	163	0.457865
5	104	118	0.531532	239	129	0.350543	279	166	0.373034	243	210	0.463576
Tukey's multiple comparisons test	Mean Diff.	95.00% CI of diff.	Significant?	Summary	Adjusted P Value
N2 vs. pmk-1(km25)	0.08935	0.01989 to 0.1588	Yes	**	0.0098
N2 vs. Column C	0.1135	0.04404 to 0.1830	Yes	**	0.0013
N2 vs. Column D	-0.003973	-0.07344 to 0.06549	No	ns	0.9984
pmk-1(km25) vs. Column C	0.02415	-0.04531 to 0.09362	No	ns	0.7545
pmk-1(km25) vs. Column D	-0.09333	-0.1628 to -0.02386	Yes	**	0.007
Column C vs. Column D	-0.1175	-0.1869 to -0.04801	Yes	***	0.0009

## Sheet: Figure 2G
	wild type (N2)			xbp-1 (zc12)			pmk-1 (km25)			xbp-1 (zc12); pmk-1 (km25)
	worm number		aversion index	worm number		aversion index	worm number		aversion index	worm number		aversion index
replicate	in lawn	out plawn	out/(in+out)	in lawn	out plawn	out/(in+out)	in lawn	out plawn	out/(in+out)	in lawn	out plawn	out/(in+out)
1	167	112	0.401434	219	101	0.315625	341	96	0.21968	319	94	0.227603
2	163	125	0.434028	223	114	0.338279	355	105	0.228261	316	115	0.266821
3	187	169	0.474719	238	143	0.375328	373	111	0.229339	303	110	0.266344
4	152	107	0.413127	214	112	0.343558	319	84	0.208437	305	110	0.26506
5	226	175	0.436409	250	98	0.281609	337	98	0.225287	370	120	0.244898
Tukey's multiple comparisons test	Mean Diff.	95.00% CI of diff.	Significant?	Summary	Adjusted P Value
N2 vs. xbp-1(tm2482)	0.08674	0.05013 to 0.1233	Yes	****	<0.0001
N2 vs. pmk-1(km25)	0.2097	0.1731 to 0.2463	Yes	****	<0.0001
N2 vs. xbp-1(tm2482); pmk-1(km25)	0.1778	0.1412 to 0.2144	Yes	****	<0.0001
xbp-1(tm2482) vs. pmk-1(km25)	0.123	0.08640 to 0.1596	Yes	****	<0.0001
xbp-1(tm2482) vs. xbp-1(tm2482); pmk-1(km25)	0.09106	0.05445 to 0.1277	Yes	****	<0.0001
pmk-1(km25) vs. xbp-1(tm2482); pmk-1(km25)	-0.03194	-0.06855 to 0.004661	No	ns	0.0986

## Sheet: Figure 2-figure supplement 1-A
original fluorenscence	EV	atf-4		relative fluorescence intensity	EV	atf-4
	n=17	n=24			n=17	n=24
	18.577	9.708			0.962287	0.502873
	18.401	23.029			0.95317	1.1929
	11.578	15.996			0.599739	0.828591
	13.829	20.494			0.716341	1.06159
	19.471	21.071			1.0086	1.09148
	22.07	14.187			1.14322	0.734885
	18.437	14.288			0.955035	0.740117
	16.346	14.733			0.846721	0.763168
	24.212	23.319			1.25418	1.20792
	19.782	14.606			1.02471	0.756589
	16.891	22.603			0.874952	1.17083
	16.858	31.852			0.873243	1.64993
	17.757	24.926			0.919811	1.29116
	20.878	12.793			1.08148	0.662676
	26.325	25.03			1.36363	1.29655
	26.904	24.158			1.39362	1.25138
	19.87	19.21			1.02926	0.995076
		12.409				0.642785
		12.615				0.653456
		22.26				1.15307
		28.416				1.47195
		28.773				1.49044
		28.532				1.47795
		23.209				1.20222
	average:				t` test	P value	P value summary	Significantly different (P < 0.05)?
	19.3051	20.3424			atf-4 vs. EV	0.5477	ns	No

## Sheet: Figure 2-figure supplement 1-B
original fluorenscence	EV	atf-6		relative fluorescence intensity	EV	atf-6
	n=17	n=12			n=17	n=12
	18.577	10.588			0.962287	0.548457
	18.401	20.354			0.95317	1.05434
	11.578	34.811			0.599739	1.80321
	13.829	15.348			0.716341	0.795025
	19.471	24.042			1.0086	1.24537
	22.07	20.705			1.14322	1.07252
	18.437	20.929			0.955035	1.08412
	16.346	56.305			0.846721	2.91659
	24.212	22.719			1.25418	1.17684
	19.782	22.574			1.02471	1.16933
	16.891	23.088			0.874952	1.19596
	16.858	16.418			0.873243	0.850451
	17.757				0.919811
	20.878				1.08148
	26.325				1.36363
	26.904				1.39362
	19.87				1.02926
	average:				t` test	P value	P value summary	Significantly different (P < 0.05)?
	19.3051	23.9901			atf-6 vs. EV	0.1362	ns	No

## Sheet: Figure 2-figure supplement 1-C
	OP50	HK-OP50
1	1.01495	1.19274
2	0.99656	1.19037
3	0.961986	1.24336
	t` test	P value	P value summary	Significantly different (P < 0.05)?
	HK-OP50 vs. OP50	0.0007	***	Yes

## Sheet: Figure 2-figure supplement 1-F
reporter gene of MAPK pmk-1/p38
HK-OP50 vs OP50	reporter	foldchange	p-adj	repeat
	nlp-29	2.6496	1.96924e-20	3
	sta-2	1.07623	0.00021576	3
	irg-1	1.49788	0.000404361	3
	irg-4	1.36148	0.000555093	3
	irg-5	3.76664	2.59491e-24	3
	sysm-1(T24B8.5)	3.12939	2.85005e-17	3

[truncated: 5 more sheets: Figure 2-figure supplement 1-G, Figure 2-figure supplement 1-H, Figure 2-figure supplement 2-A, Figure 2-figure supplement 2-B, Figure 2-figure supplement 2-C]
