# Supplementary material for: UPRER–immunity axis acts as physiological food evaluation system that promotes aversion behavior in sensing low-quality food
Source: eLife. 2024 Sep 5;13:RP94181. doi: 10.7554/eLife.94181 (PMC11377039; doi:10.7554/eLife.94181)
Supplement: Figure 3—source data 1. [file elife-94181-fig3-data1.xlsx]

## Sheet: Figure 3A
	HK-K12			HK-yfbR
	worm number		aversion index	worm number		aversion index
replicate	in lawn	out plawn	out/(in+out)	in lawn	out plawn	out/(in+out)
1	192	171	0.471074	285	179	0.385776
2	140	111	0.442231	305	172	0.360587
3	170	135	0.442623	210	127	0.376855
4	184	156	0.458824	304	186	0.379592
t` test	P value	P value summary	Significantly different (P < 0.05)?
HK-yfbR vs. HK-K12	0.0001	***	Yes

## Sheet: Figure 3C
Original fluorenscence	HK-OP50	HK-OP50+ Lactose	OP50		relative fluorenscence intensity	HK-OP50	HK-OP50+ Lactose	OP50		Tukey's multiple comparisons test	Mean Diff.	95.00% CI of diff.	Significant?	Summary	Adjusted P Value
	n=49	n=40	n=44			n=49	n=40	n=44		HK-OP50 vs. Column B	0.09149	0.01993 to 0.1630	Yes	**	0.0082
	32.248	33.291	22.746			0.802093	0.828036	0.565753		HK-OP50 vs. OP50	0.3757	0.3059 to 0.4454	Yes	****	<0.0001
	48.726	35.214	21.84			1.21194	0.875866	0.543219		Column B vs. OP50	0.2842	0.2108 to 0.3575	Yes	****	<0.0001
	38.396	29.384	22.072			0.95501	0.730858	0.548989
	39.34	28.442	23.552			0.97849	0.707428	0.585801
	32.661	36.025	21.315			0.812366	0.896037	0.530161
	53.797	41.896	20.664			1.33807	1.04206	0.513969
	34.541	39.216	22.315			0.859126	0.975406	0.555033
	39.473	34.65	29.054			0.981798	0.861837	0.72265
	51.192	35.27	29.392			1.27328	0.877259	0.731057
	31.74	29.406	28.286			0.789458	0.731405	0.703548
	42.88	41.323	26.856			1.06654	1.02781	0.66798
	41.815	36.346	27.984			1.04005	0.904022	0.696036
	41.585	47.022	29.153			1.03433	1.16956	0.725112
	33.903	45.538	28.56			0.843258	1.13265	0.710363
	40.151	38.822	28.736			0.998662	0.965606	0.714741
	59.075	34.302	26.813			1.46935	0.853182	0.66691
	49.131	30.699	23.917			1.22202	0.763566	0.594879
	53.057	41.022	23.099			1.31967	1.02033	0.574533
	31.486	46.433	27.415			0.78314	1.15491	0.681884
	46.275	42.826	30.284			1.15098	1.0652	0.753243
	42.122	30.519	27.151			1.04769	0.759089	0.675317
	33.462	41.074	25.894			0.832289	1.02162	0.644053
	33.248	29.814	23.568			0.826966	0.741553	0.586199
	40.924	57.186	27.77			1.01789	1.42237	0.690714
	42.903	40.811	26.874			1.06711	1.01508	0.668428
	38.948	41.439	25.75			0.96874	1.0307	0.640471
	31.873	36.851	25.767			0.792766	0.916582	0.640894
	42	38.008	22.688			1.04465	0.94536	0.564311
	36.932	31.093	23.266			0.918597	0.773365	0.578687
	38.387	39.814	23.523			0.954787	0.99028	0.585079
	42.595	33.478	23.491			1.05945	0.832687	0.584284
	28.526	37.779	23.74			0.709517	0.939664	0.590477
	39.257	28.778	23.347			0.976426	0.715785	0.580702
	49.301	31.177	23.527			1.22625	0.775455	0.585179
	41.68	29.435	29.814			1.03669	0.732127	0.741553
	33.988	43.093	26.271			0.845372	1.07184	0.65343
	31.093	30.877	23.213			0.773365	0.767993	0.577369
	46.575	28.712	25.278			1.15844	0.714144	0.628731
	37.636	34.267	23.609			0.936107	0.852311	0.587219
	47.378	29.727	20.571			1.17842	0.739389	0.511655
	45.277		23.291			1.12616		0.579309
	30.894		26.053			0.768416		0.648007
	39.498		26.155			0.98242		0.650544
	28.83		19.783			0.717079		0.492056
	43.592					1.08425
	37.836					0.941082
	39.399					0.979958
	44.963					1.11835
	39.446					0.981127
	average：
	40.2048	36.5265

## Sheet: Figure 3D
Original fluorenscence	HK-OP50	HK-OP50+ D-(+)-sucrose		relative fluorenscence intensity	HK-OP50	HK-OP50+ D-(+)-sucrose			Tukey's multiple comparisons test	Mean Diff.	95.00% CI of diff.	Significant?	Summary	Adjusted P Value
	n=60	n=78	n=29		n=60	n=78	n=29		HK-OP50 vs. HK-OP50+D-(+)-sucrose	0.1381	0.05944 to 0.2167	Yes	***	0.0002
	173.404	91.089	52.69		1.57425	0.826954	0.478348		HK-OP50 vs. OP50	0.525	0.4215 to 0.6286	Yes	****	<0.0001
	93.733	90.863	49.8		0.850958	0.824902	0.452111		HK-OP50+D-(+)-sucrose vs. OP50	0.387	0.2874 to 0.4865	Yes	****	<0.0001
	86.947	141.882	50.832		0.789351	1.28808	0.46148
	91.642	132.342	53.09		0.831975	1.20147	0.481979
	88.738	135.942	49.625		0.805611	1.23415	0.450522
	86.749	99.701	50.821		0.787553	0.905138	0.46138
	139.348	92.24	52.065		1.26507	0.837404	0.472674
	94.751	89.524	56.286		0.8602	0.812746	0.510994
	103.522	85.623	51.975		0.939828	0.777331	0.471857
	123.895	94.798	51.571		1.12478	0.860626	0.468189
	125.114	88.498	52.378		1.13585	0.803432	0.475515
	147.199	93.493	50.516		1.33635	0.848779	0.458611
	91.395	99.582	51.577		0.829732	0.904058	0.468243
	114.363	122.929	53.917		1.03825	1.11601	0.489487
	117.662	95.903	52.767		1.0682	0.870658	0.479047
	86.179	91.061	53.501		0.782379	0.8267	0.48571
	91.297	161.817	51.143		0.828842	1.46906	0.464303
	83.872	112.633	51.883		0.761434	1.02254	0.471021
	87.443	90.482	51.971		0.793854	0.821443	0.47182
	122.57	91.96	56.584		1.11276	0.834862	0.5137
	102.046	89.016	52.348		0.926428	0.808134	0.475243
	102.737	98.996	51.055		0.932701	0.898738	0.463504
	144.03	96.159	53.916		1.30758	0.872982	0.489478
	92.328	96.133	53.286		0.838202	0.872746	0.483759
	95.447	102.615	55.762		0.866518	0.931593	0.506237
	93.727	102.704	50.52		0.850903	0.932401	0.458647
	99.003	90.563	52.25		0.898802	0.822179	0.474353
	89.587	97.437	51.917		0.813318	0.884585	0.47133
	181.251	85.239	51.182		1.64549	0.773845	0.464657
	163.022	80.257			1.48	0.728616
	137.772	82.27			1.25077	0.746891
	91.511	88.088			0.830785	0.799709
	83.475	87.855			0.75783	0.797594
	89.12	87.197			0.809079	0.791621
	86.291	84.903			0.783395	0.770794
	81.343	86.795			0.738475	0.787971
	89.555	85.06			0.813028	0.77222
	84.408	92.966			0.7663	0.843995
	150.006	93.237			1.36183	0.846455
	175.199	98.398			1.59055	0.893309
	134.733	104.295			1.22318	0.946845
	140.472	95.31			1.27528	0.865275
	170.015	95.221			1.54349	0.864467
	133.483	88.922			1.21183	0.807281
	118.108	95.815			1.07225	0.869859
	138.324	95.65			1.25578	0.868361
	115.823	81.878			1.0515	0.743332
	88.348	78.245			0.80207	0.71035
	93.135	98.184			0.845529	0.891366
	148.144	83.022			1.34493	0.753718
	80.364	112.327			0.729587	1.01976
	97.358	96.909			0.883867	0.879791
	81.755	84.472			0.742215	0.766882
	78.425	81.894			0.711984	0.743477
	89.299	78.583			0.810704	0.713418
	95.488	74.01			0.866891	0.671902
	161.605	75.146			1.46714	0.682215
	83.396	77.913			0.757113	0.707335
	101.084	88.966			0.917694	0.80768
	77.96	72.846			0.707762	0.661335
		68.804				0.624639
		68.499				0.62187
		116.91				1.06137
		69.718				0.632937
		102.427				0.929887
		84.791				0.769778
		92.456				0.839365
		153.472				1.3933
		84.559				0.767671
		99.472				0.903059
		101.427				0.920808
		143.033				1.29853
		84.228				0.764666
		111.012				1.00783
		86.254				0.783059
		86.367				0.784085
		81.853				0.743105
		82.407				0.748134
	average
	110.15	94.9429

## Sheet: Figure 3E
Original fluorenscence	HK-OP50	HK-OP50+ D-Glc	OP50	Original fluorenscence	HK-OP50	HK-OP50+ D-Glc	OP50		Tukey's multiple comparisons test	Mean Diff.	95.00% CI of diff.	Significant?	Summary	Adjusted P Value
	n=73	n=78	n=43		n=73	n=78	n=43		HK-OP50 vs. Column B	0.06676	0.01369 to 0.1198	Yes	**	0.0093
	16.942	21.605	10.467		0.81104	1.03426	0.501072		HK-OP50 vs. OP50	0.4567	0.3940 to 0.5193	Yes	****	<0.0001
	18.954	20.941	10.287		0.907357	1.00248	0.492455		Column B vs. OP50	0.3899	0.3280 to 0.4518	Yes	****	<0.0001
	17.508	18.287	12.886		0.838135	0.875427	0.616873
	23.468	16.262	12.083		1.12345	0.778487	0.578432
	20.774	20.821	11.414		0.994484	0.996734	0.546406
	20.276	21.718	10.138		0.970644	1.03967	0.485322
	16.402	25.07	11.759		0.785189	1.20014	0.562922
	19.538	29.35	13.235		0.935314	1.40503	0.63358
	20.227	19.857	11.987		0.968298	0.950585	0.573836
	18.521	20.267	10.72		0.886629	0.970213	0.513183
	15.555	22.544	12.253		0.744642	1.07922	0.58657
	26.452	20.207	10.179		1.2663	0.96734	0.487285
	20.816	21.379	12.304		0.996494	1.02345	0.589012
	20.055	19.477	12.397		0.960064	0.932394	0.593464
	19.317	18.55	10.419		0.924735	0.888017	0.498774
	21.525	19.564	12.438		1.03044	0.936559	0.595426
	21.58	20.75	10.986		1.03307	0.993335	0.525917
	23.068	20.993	11.134		1.1043	1.00497	0.533002
	19.387	21.24	12.027		0.928086	1.01679	0.575751
	17.943	16.558	12.56		0.858959	0.792657	0.601267
	26.217	17.61	10.05		1.25505	0.843018	0.481109
	16.793	18.416	10.149		0.803907	0.881603	0.485848
	16.277	22.348	11.488		0.779205	1.06983	0.549948
	15.131	16.415	12.491		0.724344	0.785812	0.597964
	17.139	16.539	10.21		0.820471	0.791748	0.488769
	30.946	16.04	11.07		1.48143	0.76786	0.529938
	27.197	19.298	15.604		1.30196	0.923825	0.746988
	22.176	17.051	10.449		1.0616	0.816258	0.50021
	20.03	20.604	10.874		0.958867	0.986345	0.520555
	27.127	18.429	10.41		1.29861	0.882225	0.498343
	16.598	19.007	10.143		0.794572	0.909895	0.485561
	23.465	26.625	10.293		1.12331	1.27458	0.492742
	26.045	16.1	11.822		1.24681	0.770732	0.565937
	20.974	19.38	10.115		1.00406	0.927751	0.484221
	21.208	17.12	12.345		1.01526	0.819561	0.590974
	17.842	22.801	10.32		0.854124	1.09152	0.494034
	28.492	17.263	10.362		1.36396	0.826407	0.496045
	17.214	17.892	12.756		0.824061	0.856518	0.61065
	19.301	19.45	11.312		0.923969	0.931102	0.541523
	23.176	17.548	11.84		1.10947	0.84005	0.566799
	20.32	19.029	10.573		0.97275	0.910948	0.506146
	24.348	18.741	10.384		1.16558	0.897161	0.497098
	17.445	17.941	11.292		0.835119	0.858864	0.540566
	20.382	28.301			0.975718	1.35481
	27.954	17.16			1.3382	0.821476
	22.357	18.583			1.07026	0.889597
	19.607	17.798			0.938618	0.852018
	24.669	16.869			1.18094	0.807545
	17.25	25.431			0.825784	1.21742
	18.896	21.202			0.904581	1.01497
	19.011	18.214			0.910086	0.871932
	20.268	17.984			0.970261	0.860922
	28.177	17.061			1.34888	0.816737
	26.154	19.294			1.25203	0.923634
	18.018	17.658			0.86255	0.845316
	16.064	20.888			0.769009	0.999941
	22.44	18.262			1.07424	0.87423
	18.71	17.936			0.895677	0.858624
	17.754	16.636			0.849912	0.796391
	19.269	16.591			0.922437	0.794237
	22.483	20.632			1.0763	0.987686
	20.927	17.561			1.00181	0.840672
	26.278	19.845			1.25797	0.950011
	22.127	17.652			1.05925	0.845029
	20.522	18.218			0.98242	0.872124
	23.65	21.022			1.13216	1.00636
	22.258	17.127			1.06553	0.819896
	17.818	16.573			0.852975	0.793375
	22.204	18.44			1.06294	0.882751
	18.255	19.264			0.873895	0.922198
	17.865	23.924			0.855225	1.14528
	21.964	25.991			1.05145	1.24423
	17.814	16.51			0.852784	0.790359
		16.964				0.812093
		22.693				1.08635
		18.659				0.893235
		16.344				0.782413
		20.218				0.967867
	average：
	20.8892	19.4948

## Sheet: Figure 3F
Original fluorenscence	HK-OP50	HK-OP50+ D-Glc	OP50	relative fluorenscence intensity	HK-OP50	HK-OP50+ D-Glc	OP50		Tukey's multiple comparisons test	Mean Diff.	95.00% CI of diff.	Significant?	Summary	Adjusted P Value
	n=34	n=53	n=28		n=34	n=53	n=28		HK-OP50 vs. HK-OP50+D-Glc	0.2845	0.09542 to 0.4735	Yes	**	0.0015
	7.878	14.336	6.861		0.283312	0.515558	0.246739		HK-OP50 vs. OP50	0.6296	0.4100 to 0.8492	Yes	****	<0.0001
	13.346	11.078	5.914		0.479955	0.398392	0.212682		HK-OP50+D-Glc vs. OP50	0.3451	0.1441 to 0.5461	Yes	***	0.0003
	11.484	12.893	6.913		0.412993	0.463664	0.248609
	16.521	4.566	4.006		0.594136	0.164205	0.144066
	29.916	14.792	5.413		1.07585	0.531957	0.194665
	36.87	25.451	10.06		1.32594	0.915281	0.361782
	30.816	14.386	28.87		1.10822	0.517356	1.03824
	14.13	10.969	13.798		0.50815	0.394472	0.49621
	43.034	22.455	10.386		1.54761	0.807537	0.373506
	20.467	39.186	17.569		0.736044	1.40923	0.631825
	15.341	28.901	9.481		0.5517	1.03935	0.34096
	10.992	28.129	9.049		0.395299	1.01159	0.325424
	34.842	15.958	7.04		1.253	0.573889	0.253176
	44.377	44.512	10.703		1.59591	1.60076	0.384906
	18.81	32.84	10.802		0.676454	1.18101	0.388467
	30.406	10.507	5.787		1.09347	0.377858	0.208115
	40.996	9.502	10.798		1.47432	0.341715	0.388323
	24.83	14.408	4.348		0.892948	0.518147	0.156365
	22.48	40.119	8.781		0.808436	1.44278	0.315786
	22.858	21.481	8.925		0.82203	0.77251	0.320965
	37.379	17.303	13.109		1.34424	0.622259	0.471432
	20.157	8.229	13.954		0.724896	0.295935	0.50182
	32.313	18.018	17.713		1.16206	0.647972	0.637003
	31.584	22.164	7.59		1.13584	0.797072	0.272955
	33.811	27.922	6.854		1.21593	1.00414	0.246487
	34.902	18.988	10.504		1.25516	0.682855	0.37775
	21.148	31.498	2.217		0.760534	1.13275	0.0797288
	52.922	7.623	20.948		1.90321	0.274142	0.753342
	40.952	4.709			1.47274	0.169347
	55.35	17.99			1.99052	0.646965
	26.073	4.856			0.93765	0.174634
	24.145	5.238			0.868314	0.188371
	16.561	10.643			0.595575	0.382749
	27.739	8.985			0.997563	0.323123
		21.698				0.780314
		27.898				1.00328
		12.047				0.43324
		14.967				0.53825
		21.246				0.764059
		43.761				1.57375
		7.102				0.255405
		20.63				0.741906
		30.302				1.08973
		27.298				0.981704
		44.174				1.58861
		19.748				0.710187
		21.912				0.78801
		29.553				1.0628
		16.174				0.581657
		22.003				0.791282
		23.13				0.831812
		7.474				0.268784
		22.755				0.818326
	average：
	27.8068	19.8964

## Sheet: Figure 3H
	HK-OP50+D-Glc			HK-OP50+D-Glc
	worm number		aversion index	worm number		aversion index
replicate	in lawn	out plawn	out/(in+out)	in lawn	out plawn	out/(in+out)
1	236	105	0.307918	215	74	0.256055
2	126	64	0.336842	378	97	0.204211
3	319	109	0.254673	370	93	0.200864
4	232	86	0.27044	390	102	0.207317
5	300	115	0.277108	236	85	0.264798
6	344	127	0.269639	144	53	0.269036
t` test	P value	P value summary	Significantly different (P < 0.05)?
HK-OP50+D-Glc vs. HK-OP50	0.0167	*	Yes

## Sheet: Figure 3-figure supplement 1-B
original fluorenscence	HK-K12	HK-yfbR	HK-eutP	HK-yeeE	HK-yciS	HK-pspD	HK-yjgX	HK-ykgC	HK-hisL	HK-yaeI		relative fluorenscence intensity	HK-K12	HK-yfbR	HK-eutP	HK-yeeE	HK-yciS	HK-pspD	HK-yjgX	HK-ykgC	HK-hisL	HK-yaeI
	n=55	n=32	n=33	n=25	n=71	n=24	n=30	n=26	n=71	n=29			n=55	n=32	n=33	n=25	n=71	n=24	n=30	n=26	n=71	n=29
	36.587	29.983	16.121	23.389	22.722	16.526	29.375	35.041	11.785	60.073			0.848338	0.695212	0.373795	0.542317	0.526852	0.383186	0.681114	0.812491	0.273257	1.3929
	32.97	35.553	45.627	21.926	20.049	17.674	13.473	31.398	31.769	47.506			0.764471	0.824362	1.05795	0.508395	0.464873	0.409805	0.312397	0.728021	0.736623	1.10152
	31.669	32.387	13.635	38.76	20.091	23.777	21.552	22.763	17.043	52.267			0.734305	0.750953	0.316153	0.898723	0.465847	0.551314	0.499723	0.527803	0.395174	1.21191
	36.031	15.65	13.847	17.187	15.127	17.695	49.655	25.957	11.255	27.665			0.835446	0.362874	0.321068	0.398513	0.350748	0.410292	1.15134	0.601861	0.260968	0.641465
	12.912	63.082	13.051	49.454	15.8	38.919	39.749	23.941	26.139	29.891			0.299389	1.46267	0.302612	1.14668	0.366352	0.902409	0.921655	0.555117	0.606081	0.693078
	35.457	43.256	14.178	53.246	17.257	14.292	12.611	17.943	34.078	25.245			0.822137	1.00297	0.328743	1.23461	0.400136	0.331387	0.29241	0.416042	0.790162	0.585352
	42.062	23.53	48.958	33.767	20.712	47.918	22.814	63.394	26.954	15.455			0.975286	0.545587	1.13518	0.782951	0.480246	1.11107	0.528985	1.46991	0.624979	0.358353
	68.496	28.498	53.134	15.502	14.426	24.825	13.018	35.877	37.105	22.193			1.58821	0.660779	1.23201	0.359443	0.334494	0.575614	0.301847	0.831875	0.860348	0.514586
	56.981	54.668	43.034	12.432	26.145	13.466	28.095	33.403	12.818	23.054			1.32121	1.26758	0.997823	0.288259	0.60622	0.312234	0.651435	0.774511	0.297209	0.53455
	67.651	22.471	21.518	12.287	29.538	16.295	13.595	23.557	20.023	36.55			1.56861	0.521032	0.498935	0.284897	0.684894	0.37783	0.315225	0.546213	0.464271	0.84748
	58.634	51.544	27.866	30.864	48.303	68.636	23.964	28.907	26.058	30.701			1.35954	1.19514	0.646125	0.715639	1.11999	1.59145	0.55565	0.670263	0.604203	0.71186
	62.791	40.18	44.154	16.449	17.878	13.425	13.656	30.214	39.195	16.795			1.45593	0.931648	1.02379	0.381401	0.414535	0.311284	0.31664	0.700568	0.908809	0.389423
	42.604	29.693	28.854	24.624	15.365	22.269	29.158	18.188	14.364	27.978			0.987853	0.688487	0.669034	0.570953	0.356266	0.516348	0.676082	0.421723	0.333056	0.648722
	29.759	28.978	13.633	40.478	15.074	20.584	23.964	16.154	23.132	20.463			0.690018	0.671909	0.316106	0.938558	0.349519	0.477278	0.55565	0.374561	0.536358	0.474473
	14.209	33.214	25.156	14.004	21.456	45.397	18.951	58.799	13.808	56.778			0.329462	0.770128	0.583289	0.324709	0.497497	1.05261	0.439414	1.36336	0.320164	1.3165
	59.288	24.22	18.637	34.697	14.075	14.167	15.195	53.397	28.682	33.584			1.3747	0.561586	0.432134	0.804515	0.326355	0.328488	0.352324	1.23811	0.665046	0.778708
	58.788	46.238	24.094	42.374	12.688	15.572	20.794	20.606	14.371	25.675			1.36311	1.07211	0.558664	0.98252	0.294195	0.361066	0.482148	0.477788	0.333218	0.595323
	69.43	15.221	34.483	32.425	36.234	14.37	12.91	57.982	34.263	18.863			1.60986	0.352927	0.799553	0.751834	0.840153	0.333195	0.299342	1.34442	0.794451	0.437374
	58.908	16.745	33.263	24.43	41.608	24.778	12.93	54.416	14.202	26.328			1.36589	0.388264	0.771265	0.566455	0.964759	0.574524	0.299806	1.26174	0.3293	0.610464
	44.758	15.151	15.162	37.617	32.618	23.13	13.684	46.134	17.922	29.971			1.0378	0.351304	0.351559	0.87222	0.756309	0.536312	0.317289	1.0697	0.415555	0.694933
	59.184	21.166	40.264	19.933	25.443	14.639	13.617	25.729	28.997	41.528			1.37229	0.490773	0.933596	0.462184	0.589943	0.339432	0.315735	0.596575	0.672349	0.962904
	62.915	40.26	32.241	14.803	19.882	37.837	26.642	23.754	39.873	14.774			1.4588	0.933503	0.747568	0.343235	0.461001	0.877321	0.617744	0.550781	0.92453	0.342563
	35.58	40.602	49.932	18.247	15.199	18.999	22.765	31.507	19.193	17.86			0.824989	0.941433	1.15777	0.423091	0.352417	0.440527	0.527849	0.730548	0.445025	0.414117
	43.419	37.339	52.326	19.827	14.735	11.135	19.745	33.752	12.641	21.494			1.00675	0.865774	1.21328	0.459726	0.341658	0.258186	0.457825	0.782603	0.293105	0.498378
	57.212	20.856	20.69	22.642	16.672		18.938	30.174	13.225	18.11			1.32657	0.483585	0.479736	0.524997	0.386571		0.439113	0.69964	0.306646	0.419914
	36.907	20.291	53.603		46.977		14.791	23.35	13.108	36.267			0.855757	0.470485	1.24289		1.08925		0.342957	0.541413	0.303933	0.840918
	36.827	33.05	24.752		38.412		19.468		15.195	35.064			0.853903	0.766326	0.573921		0.890654		0.451402		0.352324	0.813024
	43.187	33.994	23.5		39.425		21.7		14.056	24.765			1.00137	0.788214	0.544891		0.914142		0.503155		0.325915	0.574223
	45.981	16.701	33.855		15.79		14.932		13.574	26.736			1.06616	0.387244	0.784991		0.366121		0.346226		0.314738	0.619924
	56.112	20.699	21.376		34.065		15.138		13.959				1.30106	0.479945	0.495642		0.78986		0.351003		0.323665
	18.593	17.369	34.528		25.722				13.526				0.431113	0.402733	0.800596		0.596412				0.313625
	44.356	41.628	18.735		44.962				13.084				1.02848	0.965223	0.434406		1.04253				0.303377
	49.311		28.233		44.081				20.447				1.14337		0.654635		1.0221				0.474102
	49.007				11.439				30.243				1.13632				0.265235				0.70124
	53.339				11.532				25.379				1.23676				0.267391				0.588459
	54.197				38.899				30.137				1.25666				0.901946				0.698782
	37.566				49.485				12.867				0.871038				1.1474				0.298345
	16.346				55.937				32.426				0.379012				1.297				0.751857
	37.687				17.23				35.438				0.873843				0.39951				0.821696
	14.85				31.946				17.271				0.344325				0.740727				0.40046
	53.52				21.68				58.254				1.24096				0.502691				1.35073
	17.025				30.93				44.657				0.394756				0.71717				1.03546
	18.879				23.098				25.784				0.437745				0.53557				0.59785
	20.617				22.784				44.929				0.478044				0.528289				1.04176
	66.821				21.028				26.484				1.54937				0.487573				0.614081
	72.846				30.168				43.386				1.68907				0.699501				1.00599
	43.678				31.771				51.708				1.01276				0.73667				1.19895
	39.105				20.252				13.855				0.906722				0.46958				0.321254
	65.631				11.64				17.001				1.52178				0.269895				0.3942
	21.583				13.004				15.613				0.500442				0.301522				0.362016
	14.428				21.055				44.275				0.33454				0.488199				1.0266
	56.053				20.469				50.236				1.29969				0.474612				1.16482
	51.691				24.853				37.501				1.19855				0.576263				0.86953
	39.932				31.731				35.339				0.925898				0.735742				0.8194
	17.663				21.079				56.534				0.40955				0.488756				1.31085
					22.495				18.967								0.521588				0.439785
					44.38				30.694								1.02903				0.711698
					28.138				44.771								0.652432				1.0381
					36.512				23.807								0.846599				0.55201
					43.455				20.239								1.00759				0.469279
					56.361				17.282								1.30683				0.400715
					42.841				27.743								0.993348				0.643273
					16.484				16.514								0.382212				0.382908
					14.736				38.543								0.341682				0.893691
					12.741				42.155								0.295424				0.977442
					38.572				19.562								0.894364				0.453581
					61.468				14.224								1.42525				0.32981
					20.096				43.976								0.465963				1.01967
					38.172				35.047								0.885089				0.81263
					11.928				15.949								0.276573				0.369807
					43.843				25.451								1.01658				0.590129
	average
	43.1279	31.0693	29.7709	26.8546	27.222	24.0135	20.5626	33.3207	26.3392	29.7804
Dunnett's multiple comparisons test	Mean Diff.	95.00% CI of diff.	Significant?	Summary	Adjusted P Value
HK-K12 vs. HK-yfbR	0.2796	0.09449 to 0.4647	Yes	***	0.0004
HK-K12 vs. HK-eutP	0.3097	0.1264 to 0.4930	Yes	****	<0.0001
HK-K12 vs. HK-yeeE	0.3773	0.1765 to 0.5782	Yes	****	<0.0001
HK-K12 vs. HK-yciS	0.3688	0.2192 to 0.5184	Yes	****	<0.0001
HK-K12 vs. HK-pspD	0.4432	0.2395 to 0.6469	Yes	****	<0.0001
HK-K12 vs. HK-yjgX	0.5232	0.3342 to 0.7122	Yes	****	<0.0001
HK-K12 vs. HK-ykgC	0.2274	0.02924 to 0.4256	Yes	*	0.015
HK-K12 vs. HK-hisL	0.3893	0.2397 to 0.5388	Yes	****	<0.0001
HK-K12 vs. HK-yaeI	0.3095	0.1184 to 0.5006	Yes	***	0.0001

## Sheet: Figure 3-figure supplement 1-C
original fluorenscence	HK-K12	HK-yfbR	HK-eutP	HK-yeeE	HK-yciS	HK-pspD	HK-yjgX	HK-ykgC	HK-hisL	HK-yaeI		relative fluorenscence intensity	HK-K12	HK-yfbR	HK-eutP	HK-yeeE	HK-yciS	HK-pspD	HK-yjgX	HK-ykgC	HK-hisL	HK-yaeI
	n=32	n=30	n=31	n=31	n=34	n=30	n=33	n=25	n=31	n=31			n=32	n=30	n=31	n=31	n=34	n=30	n=33	n=25	n=31	n=31
	31.312	14.903	26.353	9.152	13.021	11.392	16.341	20.079	14.364	16.652			1.18569	0.564329	0.997904	0.346557	0.493064	0.431379	0.618782	0.760328	0.543919	0.630558
	31.827	16.841	35.461	11.482	12.898	13.701	16.284	12.946	16.304	15.852			1.20519	0.637715	1.3428	0.434787	0.488406	0.518813	0.616623	0.490224	0.617381	0.600265
	20.843	12.173	23.604	12.422	10.889	16.337	13.286	30.178	20.039	9.142			0.789258	0.460953	0.893808	0.470382	0.412332	0.61863	0.503099	1.14274	0.758813	0.346178
	12.577	17.853	38.393	13.378	10.236	11.777	15.407	21.899	8.683	16.32			0.476251	0.676036	1.45382	0.506582	0.387605	0.445958	0.583414	0.829245	0.328798	0.617987
	53.707	17.154	19.517	14.182	8.95	13.361	11.316	25.466	15.311	29.637			2.03371	0.649567	0.739047	0.537027	0.338908	0.505939	0.428501	0.964316	0.579779	1.12226
	18.786	11.308	12.017	14.132	8.711	13.967	21.82	12.086	14.669	9.6			0.711366	0.428198	0.455046	0.535134	0.329858	0.528886	0.826254	0.457658	0.555468	0.363521
	16.887	18.222	20.612	27.026	10.442	15.638	13.797	27.046	11.307	11.379			0.639457	0.690009	0.780511	1.02339	0.395405	0.592161	0.522449	1.02415	0.42816	0.430887
	31.492	29.065	18.521	12.582	20.508	17.847	24.499	9.31	13.871	9.378			1.1925	1.1006	0.701331	0.47644	0.776573	0.675809	0.927699	0.35254	0.525251	0.355115
	29.639	33.672	12.834	25.977	16.469	10.895	12.202	24.215	13.709	50.666			1.12233	1.27505	0.485983	0.983666	0.623629	0.412559	0.462051	0.916945	0.519116	1.91856
	18.976	28.259	33.313	14.625	11.808	21.496	10.899	24.21	40.758	15.02			0.718561	1.07008	1.26146	0.553802	0.447131	0.813985	0.41271	0.916756	1.54338	0.56876
	22.857	12.176	11.307	13.71	11.297	11.28	17.638	20.437	16.708	9.084			0.865522	0.461066	0.42816	0.519154	0.427781	0.427138	0.667895	0.773884	0.632679	0.343982
	18.524	23.754	12.946	17.195	7.696	14.45	13.974	18.577	13.441	25.308			0.701445	0.899488	0.490224	0.65112	0.291423	0.547176	0.529151	0.703452	0.508968	0.958333
	23.181	43.605	19.659	18.167	11.629	16.972	9.79	24.148	13.924	16.013			0.877791	1.65118	0.744424	0.687927	0.440353	0.642676	0.370716	0.914408	0.527258	0.606361
	26.046	21.261	14.435	41.635	10.328	17.133	12.839	10.31	12.962	12.479			0.986279	0.805086	0.546608	1.57659	0.391089	0.648772	0.486172	0.390407	0.49083	0.47254
	18.288	14.081	13.358	16.14	9.706	47.106	15.727	34.588	12.827	8.778			0.692508	0.533203	0.505825	0.61117	0.367535	1.78375	0.595531	1.30974	0.485718	0.332395
	32.36	10.122	15.492	13.729	10.478	28.664	15.824	10.044	9.212	9.948			1.22537	0.383288	0.586633	0.519874	0.396769	1.08541	0.599205	0.380334	0.348829	0.376699
	36.226	15.264	17.553	14.367	9.7	20.622	14.97	23.902	14.9	10.333			1.37176	0.577999	0.664676	0.544033	0.367308	0.78089	0.566866	0.905093	0.564216	0.391278
	18.282	33.845	17.611	16.036	12.842	10.37	9.786	42.547	15.306	10.089			0.692281	1.2816	0.666873	0.607232	0.486286	0.392679	0.370565	1.61112	0.57959	0.382038
	45.079	41.859	14.602	16.435	10.95	10.222	24.253	21.733	13.024	12.118			1.707	1.58507	0.552931	0.622341	0.414642	0.387075	0.918384	0.82296	0.493177	0.45887
	17.849	15.528	16.227	16.732	12.113	11.018	14.243	23.608	17.994	10.892			0.675885	0.587996	0.614465	0.633588	0.458681	0.417217	0.539337	0.89396	0.681376	0.412445
	31.853	16.771	21.526	14.494	9.489	19.625	12.025	20.719	21.401	16.069			1.20617	0.635064	0.815121	0.548842	0.359318	0.743136	0.455349	0.784563	0.810388	0.608482
	27.742	24.464	18.116	11.097	17.019	9.753	20.369	15.94	14.17	17.818			1.0505	0.926374	0.685995	0.420208	0.644455	0.369315	0.771309	0.603597	0.536573	0.674711
	16.634	22.925	13.296	9.219	13.672	22.982	8.854	37.789	30.531	12.327			0.629877	0.868097	0.503477	0.349094	0.517715	0.870255	0.335273	1.43095	1.15611	0.466784
	19.559	19.268	27.006	9.697	9.104	20.366	13.045	27.532	18.691	17.713			0.740637	0.729618	1.02263	0.367195	0.34474	0.771196	0.493973	1.04255	0.707769	0.670735
	26.437	15.876	15.354	12.56	13.798	26.096	17.206	32.891	14.428	24.349			1.00109	0.601174	0.581407	0.475607	0.522486	0.988173	0.651537	1.24548	0.546342	0.922019
	24.164	17.992	53.476	24.093	8.576	19.08	23.54		14.713	24.55			0.915014	0.6813	2.02497	0.912325	0.324746	0.722499	0.891385		0.557135	0.92963
	15.354	21.962	13.952	15.895	16.315	12.552	23.629		24.355	17.865			0.581407	0.831631	0.528318	0.601893	0.617797	0.475304	0.894755		0.922246	0.676491
	23.988	25.879	20.266	11.559	9.246	27.723	14.183		9.292	10.685			0.908349	0.979955	0.767409	0.437703	0.350117	1.04978	0.537065		0.351858	0.404607
	28.075	9.961	18.93	9.391	11.642	10.997	15.75		12.212	12.643			1.06311	0.377191	0.716819	0.355607	0.440846	0.416421	0.596402		0.46243	0.47875
	27.546	16.626	15.655	14.97	9.281	19.564	9.024		9.087	23.987			1.04308	0.629574	0.592805	0.566866	0.351442	0.740826	0.34171		0.344096	0.908311
	33.169		25.899	46.748	16.352		19.244		14.801	11.967			1.256		0.980713	1.7702	0.619198		0.728709		0.560467	0.453152
	45.808				29.065		17.005						1.7346				1.1006		0.643925
					7.654		62.512										0.289833		2.36713
					16.09												0.609277
	average:
	26.4083	20.7556	20.5578	16.7364	12.2934	17.4329	17.0085	22.888	15.903	16.0858
Dunnett's multiple comparisons test	Mean Diff.	95.00% CI of diff.	Significant?	Summary	Adjusted P Value
HK-K12 vs. HK-yfbR	0.2141	0.0009830 to 0.4271	Yes	*	0.0484
HK-K12 vs. HK-eutP	0.2215	0.01026 to 0.4328	Yes	*	0.0348
HK-K12 vs. HK-yeeE	0.3662	0.1550 to 0.5775	Yes	****	<0.0001
HK-K12 vs. HK-yciS	0.5345	0.3280 to 0.7410	Yes	****	<0.0001
HK-K12 vs. HK-pspD	0.3399	0.1268 to 0.5529	Yes	***	0.0002
HK-K12 vs. HK-yjgX	0.3559	0.1479 to 0.5640	Yes	****	<0.0001
HK-K12 vs. HK-ykgC	0.1333	-0.09049 to 0.3571	No	ns	0.4941
HK-K12 vs. HK-hisL	0.3978	0.1865 to 0.6091	Yes	****	<0.0001
HK-K12 vs. HK-yaeI	0.3909	0.1796 to 0.6022	Yes	****	<0.0001

## Sheet: Figure 3-figure supplement 2-C
original fluorescence intensity	HK-OP50	HK-OP50+ D-(+)-Trehalose			HK-OP50	HK-OP50+ D-(+)-Trehalose
	n=73	n=82			n=73	n=82
	16.942	18.02			0.81104	0.862645
	18.954	19.909			0.907357	0.953075
	17.508	17.494			0.838135	0.837465
	23.468	20.737			1.12345	0.992712
	20.774	20.506			0.994484	0.981654
	20.276	18.918			0.970644	0.905634
	16.402	17.58			0.785189	0.841582
	19.538	26.171			0.935314	1.25285
	20.227	16.676			0.968298	0.798306
	18.521	18.926			0.886629	0.906017
	15.555	17.439			0.744642	0.834832
	26.452	18.069			1.2663	0.864991
	20.816	18.753			0.996494	0.897735
	20.055	18.142			0.960064	0.868486
	19.317	18.297			0.924735	0.875906
	21.525	20.573			1.03044	0.984861
	21.58	17.789			1.03307	0.851587
	23.068	19.82			1.1043	0.948814
	19.387	18.451			0.928086	0.883278
	17.943	16.89			0.858959	0.808551
	26.217	19.199			1.25505	0.919086
	16.793	21.818			0.803907	1.04446
	16.277	16.664			0.779205	0.797732
	15.131	18.373			0.724344	0.879544
	17.139	21.622			0.820471	1.03508
	30.946	22.146			1.48143	1.06016
	27.197	20.075			1.30196	0.961021
	22.176	20.155			1.0616	0.964851
	20.03	19.121			0.958867	0.915352
	27.127	16.925			1.29861	0.810226
	16.598	22.062			0.794572	1.05614
	23.465	20.98			1.12331	1.00435
	26.045	20.611			1.24681	0.986681
	20.974	21.868			1.00406	1.04686
	21.208	24.755			1.01526	1.18506
	17.842	24.228			0.854124	1.15983
	28.492	23.283			1.36396	1.11459
	17.214	23.95			0.824061	1.14652
	19.301	19.628			0.923969	0.939623
	23.176	18.263			1.10947	0.874278
	20.32	18.663			0.97275	0.893427
	24.348	23.908			1.16558	1.14451
	17.445	17.074			0.835119	0.817359
	20.382	18.371			0.975718	0.879448
	27.954	26.321			1.3382	1.26003
	22.357	22.701			1.07026	1.08673
	19.607	18.413			0.938618	0.881459
	24.669	18.421			1.18094	0.881842
	17.25	16.556			0.825784	0.792561
	18.896	22.133			0.904581	1.05954
	19.011	16.616			0.910086	0.795434
	20.268	20.694			0.970261	0.990654
	28.177	17.699			1.34888	0.847279
	26.154	32.255			1.25203	1.5441
	18.018	19.131			0.86255	0.915831
	16.064	17.743			0.769009	0.849385
	22.44	22.183			1.07424	1.06193
	18.71	29.247			0.895677	1.4001
	17.754	16.486			0.849912	0.78921
	19.269	17.309			0.922437	0.828609
	22.483	23.174			1.0763	1.10938
	20.927	18.337			1.00181	0.877821
	26.278	17.414			1.25797	0.833635
	22.127	18.757			1.05925	0.897927
	20.522	19.631			0.98242	0.939766
	23.65	19.649			1.13216	0.940628
	22.258	18.245			1.06553	0.873416
	17.818	21.425			0.852975	1.02565
	22.204	24.791			1.06294	1.18678
	18.255	20.484			0.873895	0.980601
	17.865	21.073			0.855225	1.0088
	21.964	19.163			1.05145	0.917363
	17.814	19.796			0.852784	0.947665
		20.884				0.999749
		20.097				0.962075
		17.361				0.831098
		17.45				0.835359
		20.32				0.97275
		21.007				1.00564
		22.622				1.08295
		20.689				0.990415
		19.348				0.926219
	20.8892				Unpaired t test	P value	P value summary	Significantly different (P < 0.05)?	One- or two-tailed P value?
						0.1308	ns	No	Two-tailed

## Sheet: Figure 3-figure supplement 2-D
original fluorescence intensity	HK-OP50	HK-OP50+D-(+)-Glc		relative fluorescence intensity	HK-OP50	HK-OP50+D-(+)-Glc
	n=60	n=47			n=60	n=47
	149.48	80.692			2.00452	1.08208
	47.414	99.513			0.63582	1.33447
	79.149	53.289			1.06138	0.714603
	39.032	31.049			0.523417	0.416366
	34.117	106.915			0.457508	1.43373
	60.143	58.972			0.806515	0.790812
	90.855	83.535			1.21836	1.1202
	48.526	0.031			0.650732	0.000415709
	107.291	5.041			1.43877	0.0675996
	76.613	12.012			1.02738	0.16108
	71.358	73			0.956908	0.978927
	111.35	96.506			1.4932	1.29414
	91.936	93.805			1.23286	1.25792
	57.862	53.92			0.775927	0.723065
	16.646	19.735			0.223222	0.264646
	38.015	52.79			0.50978	0.707912
	54.19	84.976			0.726686	1.13952
	100.232	85.053			1.34411	1.14056
	36.497	90.974			0.489423	1.21996
	73.633	18.106			0.987415	0.242801
	44.374	23.853			0.595053	0.319868
	85.667	62.289			1.14879	0.835293
	97.232	114.365			1.30388	1.53363
	58.203	68.019			0.7805	0.912132
	96.131	48.835			1.28911	0.654875
	92.176	47.764			1.23608	0.640513
	18.51	36.766			0.248218	0.493031
	47.596	29.549			0.63826	0.396251
	82.242	138.023			1.10286	1.85088
	97.124	83.506			1.30243	1.11981
	36.916	33.787			0.495042	0.453082
	70.497	44.859			0.945362	0.601557
	116.59	92.125			1.56347	1.23539
	133.331	24.69			1.78796	0.331092
	29.968	56.331			0.40187	0.755396
	26.683	59.366			0.357818	0.796096
	58.617	12.774			0.786051	0.171299
	79.656	28.954			1.06818	0.388272
	98.475	111.413			1.32055	1.49404
	105.594	50.9			1.41601	0.682567
	110.578	30.547			1.48285	0.409634
	81.054	65.996			1.08693	0.885004
	124.664	48.551			1.67174	0.651067
	105.052	38.796			1.40874	0.520253
	27.664	36.438			0.370973	0.488632
	68.276	55.695			0.915578	0.746868
	93.866	37.058			1.25874	0.496946
	86.385				1.15842
	56.664				0.759862
	46.746				0.626862
	93.485				1.25363
	66.105				0.886465
	102.233				1.37094
	64.709				0.867745
	40.142				0.538303
	96.884				1.29921
	126.287				1.6935
	82.342				1.1042
	45.214				0.606318
	96.016				1.28757
	74.5714		Unpaired t test	P value	P value summary	Significantly different (P < 0.05)?	One- or two-tailed P value?
				0.0049	**	Yes	Two-tailed

[truncated: 1 more sheets: Figure 3-figure supplement 2-G]
