# Supplementary material for: UPRER–immunity axis acts as physiological food evaluation system that promotes aversion behavior in sensing low-quality food
Source: eLife. 2024 Sep 5;13:RP94181. doi: 10.7554/eLife.94181 (PMC11377039; doi:10.7554/eLife.94181)
Supplement: Figure 4—source data 1. [file elife-94181-fig4-data1.xlsx]

## Sheet: Figure 4B
replicate	K12	HK-K12	HK-yfbR
1	0.219776	0.23282	0.359187
2	0.189076	0.155616	0.361726
3	0.246549	0.242387	0.25888
4	0.183008	0.241398	0.274963
5	0.163731	0.157266	0.244066
6	0.165516	0.100848	0.258456
Tukey's multiple comparisons test	Mean Diff.	95.00% CI of diff.	Significant?	Summary	Adjusted P Value
Live-K12 vs. HK-K12	0.00622	-0.06814 to 0.08058	No	ns	0.9744
Live-K12 vs. HK-yfbR	-0.09827	-0.1726 to -0.02391	Yes	**	0.0097
HK-K12 vs. HK-yfbR	-0.1045	-0.1789 to -0.03013	Yes	**	0.0063

## Sheet: Figure 4C
replicate	HK-OP50/EV	HK-OP50/RNAi(Y39G8B.1; E03H4.3; dhgd-1)	HK-OP50+D-GlcA/EV	HK-OP50+D-GlcA/RNAi(Y39G8B.1; E03H4.3; dhgd-1)
1	0.214793	0.168023	0.278113	0.141669
2	0.198891	0.156708	0.262597	0.137635
3	0.225032	0.144706	0.273646	0.156721
4	0.219368	0.143677	0.29504	0.163703
5	0.229389	0.148306	0.264007	0.157497
6	0.226774	0.169738	0.252488	0.148807
7	0.209783	0.152421	0.255779	0.149583
8	0.200415	0.158594	0.230389	0.139342
Tukey's multiple comparisons test	Mean Diff.	95.00% CI of diff.	Significant?	Summary	Adjusted P Value
HK-OP50/EV vs. HK-OP50/RNAi(Y39G8B.1; E03H4.3; dhgd-1)	0.06028	0.04230 to 0.07827	Yes	****	<0.0001
HK-OP50/EV vs. HK-OP50+D-GlcA/EV	-0.04845	-0.06644 to -0.03046	Yes	****	<0.0001
HK-OP50/EV vs. HK-OP50+D-GlcA/RNAi(Y39G8B.1; E03H4.3; dhgd-1)	0.06619	0.04820 to 0.08417	Yes	****	<0.0001
HK-OP50/RNAi(Y39G8B.1; E03H4.3; dhgd-1) vs. HK-OP50+D-GlcA/EV	-0.1087	-0.1267 to -0.09075	Yes	****	<0.0001
HK-OP50/RNAi(Y39G8B.1; E03H4.3; dhgd-1) vs. HK-OP50+D-GlcA/RNAi(Y39G8B.1; E03H4.3; dhgd-1)	0.005902	-0.01209 to 0.02389	No	ns	0.807
HK-OP50+D-GlcA/EV vs. Column D	0.1146	0.09665 to 0.1326	Yes	****	<0.0001

## Sheet: Figure 4D
Original fluorenscence				relative fluorenscence intensity				Dunnett's multiple comparisons test	Mean Diff.	95.00% CI of diff.	Significant?	Summary	Adjusted P Value
HK-OP50	HK-OP50+ D-GlcA	HK-OP50+ VC		HK-OP50	HK-OP50+ D-GlcA	HK-OP50+ VC		HK-OP50 vs. HK-OP50+ D-GlcA	0.4947	0.1822 to 0.8072	Yes	**	0.0011
n=44	n=20	n=22		n=44	n=20	n=22		HK-OP50 vs. HK-OP50+ VC	0.7097	0.4071 to 1.012	Yes	****	<0.0001
11.005	6.174	15.986		0.264324	0.14829	0.38396
62.005	4.594	24.219		1.48927	0.110341	0.581705
51.489	22.604	6.54		1.23669	0.542915	0.157081
94.886	5.064	6.251		2.27902	0.12163	0.15014
56.995	17.768	9.867		1.36894	0.426761	0.236991
33.545	30.413	3.052		0.805702	0.730476	0.0733046
16.944	45.796	7.441		0.40697	1.09995	0.178722
27.369	28.125	2.035		0.657363	0.675522	0.0488777
26.753	25.337	0.468		0.642568	0.608558	0.0112407
17.778	13.025	6.711		0.427002	0.312842	0.161188
102.717	14.963	12.278		2.46711	0.359389	0.2949
27.453	51.111	9.246		0.659381	1.22761	0.222075
20.709	37.378	2.517		0.4974	0.897765	0.0604547
6.57	26.959	13.442		0.157802	0.647516	0.322857
27.735	8.559	2.857		0.666154	0.205575	0.068621
23.843	17.784	14.165		0.572674	0.427146	0.340223
36.392	28.458	12.502		0.874083	0.68352	0.30028
25.496	25.06	12.638		0.612377	0.601905	0.303546
35.432	7.836	25.184		0.851025	0.188209	0.604883
56.85	3.745	40.836		1.36545	0.0899494	0.980821
41.815		14.932		1.00434		0.358645
36.738		22.781		0.882393		0.547166
37.299				0.895868
19.471				0.467665
60.734				1.45874
7.404				0.177833
16.249				0.390277
81.407				1.95528
13.072				0.31397
13.246				0.31815
93.379				2.24283
26.752				0.642544
8.168				0.196183
67.357				1.61782
19.979				0.479866
89.734				2.15528
27.868				0.669349
60.217				1.44632
66.734				1.60285
39.644				0.952191
67.45				1.62005
89.25				2.14365
72.956				1.7523
13.029				0.312938
average:
41.6345	21.0376	12.0885

## Sheet: Figure 4E
Original fluorenscence				relative fluorenscence intensity
HK-OP50	HK-OP50+ D-GlcA	HK-OP50+ VC		HK-OP50	HK-OP50+ D-GlcA	HK-OP50+ VC		Dunnett's multiple comparisons test	Mean Diff.	95.00% CI of diff.	Significant?	Summary	Adjusted P Value
n=34	n=34	n=55		n=34	n=34	n=55		HK-OP50 vs. Column B	0.2291	0.0009781 to 0.4573	Yes	*	0.0489
7.878	20.109	8.595		0.283312	0.723169	0.309097		HK-OP50 vs. Column C	0.3845	0.1793 to 0.5897	Yes	***	0.0001
13.346	39.357	20.236		0.479955	1.41538	0.727737
11.484	26.044	22.616		0.412993	0.936607	0.813327
16.521	13.052	22.169		0.594136	0.469382	0.797252
29.916	51.664	30.285		1.07585	1.85797	1.08912
36.87	34.731	19.737		1.32594	1.24901	0.709791
30.816	3.001	20.224		1.10822	0.107923	0.727305
14.13	13.147	0.524		0.50815	0.472799	0.0188443
43.034	20.505	1.041		1.54761	0.73741	0.0374369
20.467	9.224	11.393		0.736044	0.331718	0.40972
15.341	23.872	28.731		0.5517	0.858496	1.03324
10.992	15.642	2.634		0.395299	0.562525	0.0947252
34.842	5.888	1.926		1.253	0.211747	0.0692637
44.377	6.761	1.184		1.59591	0.243142	0.0425796
18.81	5.008	4.489		0.676454	0.1801	0.161436
30.406	35.321	18.142		1.09347	1.27023	0.652431
40.996	38.559	3.726		1.47432	1.38668	0.133996
24.83	9.259	35.075		0.892948	0.332977	1.26138
22.48	15.436	5.055		0.808436	0.555117	0.18179
22.858	23.904	39.159		0.82203	0.859647	1.40825
37.379	25.531	29.829		1.34424	0.918158	1.07272
20.157	23.667	7.106		0.724896	0.851124	0.255549
32.313	14.331	7.343		1.16206	0.515378	0.264072
31.584	20.314	39.726		1.13584	0.730542	1.42865
33.811	9.425	33.913		1.21593	0.338946	1.2196
34.902	32.009	21.04		1.25516	1.15112	0.75665
21.148	4.473	20.05		0.760534	0.16086	0.721048
52.922	15.558	29.851		1.90321	0.559504	1.07352
40.952	15.15	13.029		1.47274	0.544831	0.468555
55.35	26.649	20.093		1.99052	0.958364	0.722594
26.073	29.641	7.064		0.93765	1.06596	0.254039
24.145	40.534	4.253		0.868314	1.4577	0.152948
16.561	18.069	4.014		0.595575	0.649806	0.144353
27.739	42.975	25.213		0.997563	1.54549	0.906722
		21.352				0.767871
		19.085				0.686344
		5.741				0.206461
		31.233				1.12322
		21.124				0.759671
		25.112				0.90309
		4.738				0.17039
		31.126				1.11937
		18.95				0.681489
		24.907				0.895717
		16.908				0.608053
		7.093				0.255082
		16.816				0.604745
		16.31				0.586548
		5.335				0.19186
		23.013				0.827604
		3.794				0.136442
		6.019				0.216458
		29.966				1.07765
		22.344				0.803545
		30.845				1.10926
average:
27.8068	21.4356	17.1141

## Sheet: Figure 4H
	HK-OP50			HK-OP50+D-GlcA			HK-OP50+VC
	worm number		aversion index	worm number		aversion index	worm number		aversion index
replicate	in lawn	out plawn	out/(in+out)	in lawn	out plawn	out/(in+out)	in lawn	out plawn	out/(in+out)
1	153	120	0.43956	110	81	0.424084	111	72	0.393443
2	99	78	0.440678	137	98	0.417021	130	78	0.375
3	110	95	0.463415	90	63	0.411765	117	69	0.370968
4	109	92	0.457711	142	96	0.403361	176	116	0.39726
Dunnett's multiple comparisons test	Mean Diff.	95.00% CI of diff.	Significant?	Summary	Adjusted P Value
Column B vs. HK-OP50	-0.03628	-0.05744 to -0.01512	Yes	**	0.0028
Column C vs. HK-OP50	-0.06617	-0.08733 to -0.04501	Yes	****	<0.0001

## Sheet: Figure 4I
Original fluorenscence	HK-OP50		HK-OP50+ D-GlcA		HK-OP50+ VC			relative fluorenscence intensity	HK-OP50		HK-OP50+ D-GlcA		HK-OP50+ VC				Tukey's multiple comparisons test	Predicted (LS) mean diff.	95.00% CI of diff.	Significant?	Summary	Adjusted P Value
	RNAi (EV)	RNAi (dhgd-1; E03H4.3; Y39G8B.1)	RNAi (EV)	RNAi (dhgd-1; E03H4.3; Y39G8B.1)	RNAi (EV)	RNAi (dhgd-1; E03H4.3; Y39G8B.1)			RNAi (EV)	RNAi (dhgd-1; E03H4.3; Y39G8B.1)	RNAi (EV)	RNAi (dhgd-1; E03H4.3; Y39G8B.1)	RNAi (EV)	RNAi (dhgd-1; E03H4.3; Y39G8B.1)
	n=61	n=46	n=48	n=42	n=63	n=49			n=61	n=46	n=48	n=42	n=63	n=49			EV:HK-OP50 vs. EV:HK-OP50+D-GlcA	0.207	0.09325 to 0.3208	Yes	****	<0.0001
	76.422	81.783	71.6	140.072	80.923	70.291			0.752071	0.804829	0.704618	1.37845	0.796366	0.691736			EV:HK-OP50 vs. EV:HK-OP50+VC	0.2475	0.1419 to 0.3532	Yes	****	<0.0001
	149.739	71.92	121.414	135.498	67.397	69.103			1.47359	0.707767	1.19484	1.33344	0.663256	0.680045			EV:HK-OP50 vs. RNAi :HK-OP50	0.001956	-0.1139 to 0.1178	No	ns	>0.9999
	111.443	79.91	58.027	65.043	78.334	77.089			1.09671	0.786397	0.571046	0.64009	0.770887	0.758635			EV:HK-OP50+D-GlcA vs. RNAi :HK-OP50+D-GlcA	-0.1255	-0.2506 to -0.0003664	Yes	*	0.0489
	101.056	95.26	54.469	57.038	71.098	67.415			0.994495	0.937457	0.536031	0.561313	0.699678	0.663433			EV:HK-OP50+D-GlcA vs. RNAi :HK-OP50+VC	0.05545	-0.06365 to 0.1746	No	ns	0.7638
	113.264	128.901	58.548	72.243	74.806	105.248			1.11463	1.26852	0.576173	0.710946	0.736168	1.03575			EV:HK-OP50+VC vs. RNAi :HK-OP50+VC	0.01493	-0.09806 to 0.1279	No	ns	0.9989
	141.68	106.368	56.33	120.951	83.333	78.977			1.39428	1.04677	0.554345	1.19028	0.820083	0.777215			EV:HK-OP50+D-GlcA vs. EV:HK-OP50+VC	0.04052	-0.07251 to 0.1535	No	ns	0.9064
	82.849	65.339	54.937	122.739	66.994	64.468			0.81532	0.643003	0.540637	1.20788	0.65929	0.634432
	146.285	138.317	120.705	110.728	80.696	65.8			1.4396	1.36118	1.18786	1.08968	0.794132	0.64754
	116.698	134.589	66.562	101.863	88.881	72.954			1.14843	1.32449	0.655039	1.00244	0.874681	0.717943
	145.959	104.633	73.601	68.14	75.482	62.241			1.43639	1.0297	0.72431	0.670568	0.742821	0.612516
	134.267	88.176	86.515	65.36	68.905	59.76			1.32133	0.867743	0.851397	0.64321	0.678096	0.5881
	76.917	71.834	83.055	65.595	61.844	106.748			0.756943	0.706921	0.817347	0.645522	0.608609	1.05051
	81.938	84.488	114.277	63.02	73.976	64.843			0.806354	0.831449	1.1246	0.620182	0.728	0.638122
	119.99	75.164	70.897	95.139	71.244	60.951			1.18083	0.739691	0.6977	0.936266	0.701114	0.599821
	103.238	117.921	76.963	91.55	72.463	65.715			1.01597	1.16046	0.757395	0.900946	0.713111	0.646703
	79.484	130.657	102.156	111.246	92.78	81.697			0.782205	1.2858	1.00532	1.09478	0.913051	0.803983
	117.334	150.473	87.075	92.501	79.364	96.836			1.15469	1.48081	0.856908	0.910305	0.781024	0.952966
	107.744	112.156	69.653	105.621	87.546	75.613			1.06031	1.10373	0.685457	1.03942	0.861543	0.74411
	64.178	77.123	70.095	65.764	65.578	60.53			0.631578	0.75897	0.689807	0.647186	0.645355	0.595678
	103.44	103.909	87.415	96.847	108.952	63.5			1.01796	1.02257	0.860254	0.953074	1.0722	0.624906
	98.349	83.885	66.612	85.482	71.697	77.095			0.967856	0.825515	0.655531	0.841231	0.705572	0.758694
	71.174	130.811	119.435	65.804	62.365	88.701			0.700426	1.28732	1.17536	0.647579	0.613736	0.872909
	69.488	119.729	82.654	123.269	74.711	65.381			0.683834	1.17826	0.813401	1.21309	0.735233	0.643417
	84.545	71.6	80.601	92.223	64.818	84.458			0.83201	0.704618	0.793197	0.907569	0.637876	0.831154
	74.188	73.676	109.614	71.355	84.046	76.232			0.730086	0.725048	1.07871	0.702207	0.827099	0.750202
	69.921	70.832	81.429	123.082	64.052	65.993			0.688095	0.69706	0.801345	1.21125	0.630338	0.649439
	87.164	78.235	89.34	62.68	86.642	80.106			0.857784	0.769913	0.879198	0.616836	0.852647	0.788326
	87.366	65.142	57.661	113.68	60.447	68.827			0.859772	0.641064	0.567444	1.11873	0.594861	0.677329
	117.938	140.424	63.233	103.176	93.863	80.672			1.16063	1.38192	0.622278	1.01536	0.923709	0.793896
	73.012	131.881	100.493	90.798	79.652	71.668			0.718513	1.29785	0.988955	0.893546	0.783858	0.705287
	91.182	154.147	70.757	83.766	105.139	80.859			0.897325	1.51697	0.696322	0.824344	1.03468	0.795736
	124.726	136.662	88.171	172.349	65.522	82.918			1.22743	1.3449	0.867694	1.69609	0.644804	0.815999
	95.155	119.074	90.705	71.559	76.66	62.905			0.936423	1.17181	0.892631	0.704214	0.754414	0.61905
	124.047	106.439	88.34	61.997	65.961	67.874			1.22075	1.04747	0.869357	0.610114	0.649124	0.66795
	107.111	127.284	71.946	121.444	72.199	68.619			1.05408	1.25261	0.708023	1.19513	0.710513	0.675282
	115.993	106.367	110.829	95.332	72.133	74.461			1.14149	1.04676	1.09067	0.938165	0.709863	0.732773
	96.897	95.443	66.51	80.031	63.98	74.398			0.953566	0.939258	0.654527	0.787588	0.629629	0.732153
	72.555	88.119	65.467	64.501	83.512	78.932			0.714016	0.867182	0.644263	0.634756	0.821844	0.776772
	121.107	70.653	115.569	134.1	69.09	74.516			1.19182	0.695298	1.13732	1.31968	0.679917	0.733314
	94.338	73.875	58.212	107.004	67.123	125.306			0.928383	0.727006	0.572866	1.05303	0.66056	1.23314
	131.171	66.802	88.791	83.198	65.379	84.523			1.29086	0.657401	0.873795	0.818754	0.643397	0.831794
	109.319	144.788	74.229	68.901	66.894	63.828			1.07581	1.42486	0.73049	0.678057	0.658306	0.628133
	80.192	82.754	58.01		106.038	84.073			0.789172	0.814385	0.570878		1.04352	0.827365
	109.945	132.532	98.593		86.969	59.114			1.08197	1.30425	0.970257		0.855865	0.581743
	110.573	70.328	61.202		66.381	66.765			1.08815	0.6921	0.602291		0.653258	0.657036
	110.053	106.533	87.859		67.236	70.433			1.08304	1.04839	0.864623		0.661672	0.693133
	75.403		76.541		66.557	80.889			0.742043		0.753242		0.65499	0.796031
	119.524		60.268		66.706	72.13			1.17624		0.593099		0.656456	0.709834
	69.842				65.587	68.093			0.687317				0.645444	0.670105
	125.582				71.447				1.23586				0.703112
	127.517				77.142				1.2549				0.759157
	67.912				89.299				0.668324				0.878794
	106.81				86.212				1.05112				0.848415
	89.411				64.244				0.879896				0.632227
	112.48				63.087				1.10692				0.620841
	80.598				134.993				0.793167				1.32847
	116.369				67.003				1.14519				0.659379
	84.72				104.187				0.833732				1.02531
	171.089				65.62				1.68369				0.645769
	90.155				67.065				0.887218				0.659989
	59.691				66.408				0.587421				0.653523
					101.832								1.00213
					67.455								0.663827
	average:
	101.615	101.455	80.5701	93.3974	76.4754	74.8887

## Sheet: Figure 4J
Original fluorenscence	HK-OP50		HK-OP50+ D-GlcA		HK-OP50+ VC			relative fluorenscence intensity	HK-OP50		HK-OP50+ D-GlcA		HK-OP50+ VC				HK-OP50		HK-OP50+ D-GlcA		HK-OP50+ VC			Tukey's multiple comparisons test	Predicted (LS) mean diff.	95.00% CI of diff.	Significant?	Summary	Adjusted P Value
	RNAi （EV）	RNAi (dhgd-1; E03H4.3; Y39G8B.1)	RNAi （EV）	RNAi (dhgd-1; E03H4.3; Y39G8B.1)	RNAi （EV）	RNAi (dhgd-1; E03H4.3; Y39G8B.1)			RNAi （EV）	RNAi (dhgd-1; E03H4.3; Y39G8B.1)	RNAi （EV）	RNAi (dhgd-1; E03H4.3; Y39G8B.1)	RNAi （EV）	RNAi (dhgd-1; E03H4.3; Y39G8B.1)			RNAi （EV）	RNAi (dhgd-1; E03H4.3; Y39G8B.1)	RNAi （EV）	RNAi (dhgd-1; E03H4.3; Y39G8B.1)	RNAi （EV）	RNAi (dhgd-1; E03H4.3; Y39G8B.1)
	n=64	n=79	n=61	n=93	n=62	n=76			n=64	n=79	n=61	n=93	n=62	n=76			n=64	n=79	n=61	n=93	n=62	n=76		EV:HK-OP50 vs. EV:HK-OP50+D-GlcA	0.2139	0.08848 to 0.3392	Yes	****	<0.0001
	85.85	59.523	38.991	78.939	75.333	66.207			1.25754	0.871899	0.571144	1.15631	1.10348	0.969806			1.25754	0.871899	0.571144	1.15631	1.10348	0.969806		EV:HK-OP50 vs. EV:HK-OP50+VC	0.1543	0.02950 to 0.2791	Yes	**	0.0061
	70.693	32.858	56.027	67.903	71.551	54.732			1.03552	0.481307	0.820689	0.99465	1.04809	0.80172			1.03552	0.481307	0.820689	0.99465	1.04809	0.80172		EV:HK-OP50 vs. RNAi:HK-OP50	-0.04058	-0.1637 to 0.08255	No	ns	0.9323
	59.855	80.164	41.203	52.162	33.163	74.575			0.876762	1.17425	0.603545	0.764074	0.485775	1.09238			0.876762	1.17425	0.603545	0.764074	0.485775	1.09238		EV:HK-OP50+D-GlcA vs. RNAi:HK-OP50+D-GlcA	-0.1303	-0.2510 to -0.009697	Yes	*	0.026
	39.048	71.698	60.705	65.787	58.583	75.917			0.571979	1.05024	0.889213	0.963654	0.858129	1.11204			0.571979	1.05024	0.889213	0.963654	0.858129	1.11204		EV:HK-OP50+D-GlcA vs. RNAi:HK-OP50+VC	-0.1178	-0.2428 to 0.007175	No	ns	0.0776
	102.447	66.915	64.346	40.817	41.179	57.055			1.50065	0.980177	0.942546	0.597891	0.603194	0.835747			1.50065	0.980177	0.942546	0.597891	0.603194	0.835747		EV:HK-OP50+VC vs. RNAi:HK-OP50+VC	-0.05825	-0.1835 to 0.06702	No	ns	0.7611
	63.812	85.277	57.119	66.264	76.725	97.735			0.934724	1.24915	0.836685	0.970641	1.12388	1.43163			0.934724	1.24915	0.836685	0.970641	1.12388	1.43163		EV:HK-OP50+D-GlcA vs. EV:HK-OP50+VC	-0.05954	-0.1858 to 0.06675	No	ns	0.7542
	94.551	62.991	48.745	57.531	39.029	81.303			1.38499	0.922698	0.714021	0.84272	0.5717	1.19093			1.38499	0.922698	0.714021	0.84272	0.5717	1.19093
	47.982	88.243	50.062	82.016	62.598	52.692			0.702845	1.29259	0.733313	1.20138	0.916941	0.771837			0.702845	1.29259	0.733313	1.20138	0.916941	0.771837
	46.455	78.711	61.104	53.441	57.673	62.217			0.680477	1.15297	0.895057	0.782809	0.8448	0.91136			0.680477	1.15297	0.895057	0.782809	0.8448	0.91136
	75.001	33.267	49.692	55.039	44.763	89.097			1.09862	0.487298	0.727893	0.806216	0.655693	1.3051			1.09862	0.487298	0.727893	0.806216	0.655693	1.3051
	93.182	95.193	35.177	48.443	75.36	74.5			1.36494	1.3944	0.515276	0.709598	1.10388	1.09128			1.36494	1.3944	0.515276	0.709598	1.10388	1.09128
	52.831	85.266	33.102	52.107	42.899	50.461			0.773873	1.24898	0.484881	0.763268	0.628389	0.739157			0.773873	1.24898	0.484881	0.763268	0.628389	0.739157
	52.015	79.636	34.802	98.194	53.121	54.367			0.761921	1.16652	0.509783	1.43835	0.778121	0.796373			0.761921	1.16652	0.509783	1.43835	0.778121	0.796373
	82.284	51.668	39.098	67.045	62.078	64.585			1.2053	0.756838	0.572711	0.982081	0.909324	0.946047			1.2053	0.756838	0.572711	0.982081	0.909324	0.946047
	73.161	89.21	70.47	89.186	50.989	68.986			1.07167	1.30676	1.03225	1.3064	0.746892	1.01051			1.07167	1.30676	1.03225	1.3064	0.746892	1.01051
	54.257	68.887	58.844	72.758	58.558	71.476			0.794762	1.00906	0.861952	1.06577	0.857763	1.04699			0.794762	1.00906	0.861952	1.06577	0.857763	1.04699
	52.51	76.135	39.195	78.628	35.211	55.57			0.769171	1.11523	0.574132	1.15175	0.515774	0.813995			0.769171	1.11523	0.574132	1.15175	0.515774	0.813995
	77.642	72.735	83.04	62.886	61.547	65.52			1.13731	1.06543	1.21638	0.92116	0.901546	0.959743			1.13731	1.06543	1.21638	0.92116	0.901546	0.959743
	83.752	90.914	60.646	74.984	57.375	88.024			1.22681	1.33172	0.888348	1.09837	0.840434	1.28938			1.22681	1.33172	0.888348	1.09837	0.840434	1.28938
	73.575	81.661	38.968	95.871	36.79	84.982			1.07773	1.19618	0.570807	1.40433	0.538903	1.24482			1.07773	1.19618	0.570807	1.40433	0.538903	1.24482
	54.559	69.458	56.22	71.609	87.417	76.708			0.799185	1.01743	0.823516	1.04894	1.28049	1.12363			0.799185	1.01743	0.823516	1.04894	1.28049	1.12363
	39.924	71.955	69.54	72.604	34.83	51.512			0.584811	1.054	1.01863	1.06351	0.510193	0.754553			0.584811	1.054	1.01863	1.06351	0.510193	0.754553
	80.864	72.339	62.309	44.715	72.988	49.57			1.1845	1.05963	0.912708	0.65499	1.06914	0.726106			1.1845	1.05963	0.912708	0.65499	1.06914	0.726106
	93.825	85.212	57.914	69.155	62.31	67.572			1.37436	1.24819	0.84833	1.01299	0.912723	0.989801			1.37436	1.24819	0.84833	1.01299	0.912723	0.989801
	60.382	86.629	37.514	38.131	34.606	65.962			0.884481	1.26895	0.549509	0.558546	0.506912	0.966218			0.884481	1.26895	0.549509	0.558546	0.506912	0.966218
	95.895	40.066	56.656	40.361	39.825	51.967			1.40468	0.586891	0.829902	0.591212	0.58336	0.761218			1.40468	0.586891	0.829902	0.591212	0.58336	0.761218
	95.137	32.384	60.065	72.134	38.162	50.808			1.39358	0.474364	0.879838	1.05663	0.559001	0.74424			1.39358	0.474364	0.879838	1.05663	0.559001	0.74424
	42.058	78.873	55.667	53.036	42.599	55.78			0.61607	1.15534	0.815415	0.776876	0.623994	0.817071			0.61607	1.15534	0.815415	0.776876	0.623994	0.817071
	85.913	76.207	42.815	82.246	77.433	38.579			1.25846	1.11629	0.627158	1.20475	1.13425	0.565109			1.25846	1.11629	0.627158	1.20475	1.13425	0.565109
	63.117	31.64	59.433	77.894	59.036	36.848			0.924544	0.463466	0.87058	1.141	0.864765	0.539753			0.924544	0.463466	0.87058	1.141	0.864765	0.539753
	57.173	88.758	52.175	96.364	76.978	61.93			0.837476	1.30014	0.764264	1.41155	1.12758	0.907156			0.837476	1.30014	0.764264	1.41155	1.12758	0.907156
	49.523	71.533	47.21	122.17	51.271	41.304			0.725418	1.04782	0.691537	1.78956	0.751022	0.605025			0.725418	1.04782	0.691537	1.78956	0.751022	0.605025
	73.577	99.902	40.896	44.158	45.501	40.855			1.07776	1.46337	0.599048	0.646831	0.666503	0.598448			1.07776	1.46337	0.599048	0.646831	0.666503	0.598448
	78.457	51.93	75.347	44.115	60.696	52.809			1.14925	0.760676	1.10369	0.646201	0.889081	0.773551			1.14925	0.760676	1.10369	0.646201	0.889081	0.773551
	83.501	42.537	62.073	56.184	53.243	44.359			1.22313	0.623086	0.909251	0.822989	0.779908	0.649775			1.22313	0.623086	0.909251	0.822989	0.779908	0.649775
	36.567	32.874	65.956	56.562	69.823	73.807			0.535637	0.481541	0.96613	0.828526	1.02277	1.08113			0.535637	0.481541	0.96613	0.828526	1.02277	1.08113
	102.955	75.55	32.108	52.453	42.043	92.285			1.50809	1.10666	0.470321	0.768336	0.61585	1.3518			1.50809	1.10666	0.470321	0.768336	0.61585	1.3518
	82.172	33.234	48.067	81.318	51.645	59.714			1.20366	0.486815	0.70409	1.19115	0.756501	0.874696			1.20366	0.486815	0.70409	1.19115	0.756501	0.874696
	45.943	77.294	36.022	47.597	49.513	34.11			0.672977	1.13221	0.527654	0.697205	0.725271	0.499647			0.672977	1.13221	0.527654	0.697205	0.725271	0.499647
	72.984	85.631	43.84	33.05	40.585	61.692			1.06908	1.25433	0.642172	0.48412	0.594493	0.90367			1.06908	1.25433	0.642172	0.48412	0.594493	0.90367
	67.594	83.868	44.513	35.283	49.805	58.402			0.990123	1.22851	0.652031	0.516829	0.729548	0.855478			0.990123	1.22851	0.652031	0.516829	0.729548	0.855478
	75.639	76.785	48.395	63.51	58.628	63.792			1.10797	1.12475	0.708895	0.9303	0.858788	0.934431			1.10797	1.12475	0.708895	0.9303	0.858788	0.934431
	83.458	55.157	63.258	37.035	65.62	36.277			1.2225	0.807945	0.926609	0.542492	0.961208	0.531389			1.2225	0.807945	0.926609	0.542492	0.961208	0.531389
	74.172	52.946	86.142	48.821	79.697	33.192			1.08648	0.775558	1.26182	0.715135	1.16741	0.4862			1.08648	0.775558	1.26182	0.715135	1.16741	0.4862
	44.543	91.946	74.298	52.068	68.959	76.665			0.65247	1.34683	1.08832	0.762697	1.01012	1.123			0.65247	1.34683	1.08832	0.762697	1.01012	1.123
	36.986	87.235	54.311	43.281	38.806	65.481			0.541774	1.27783	0.795553	0.633984	0.568434	0.959172			0.541774	1.27783	0.795553	0.633984	0.568434	0.959172
	55.14	58.104	42.952	54.006	48.266	88.304			0.807696	0.851113	0.629165	0.791085	0.707005	1.29349			0.807696	0.851113	0.629165	0.791085	0.707005	1.29349
	71.984	66.933	62.407	109.51	81.557	78.14			1.05443	0.980441	0.914144	1.60411	1.19465	1.1446			1.05443	0.980441	0.914144	1.60411	1.19465	1.1446
	63.101	72.077	54.476	54.162	73.879	48.579			0.924309	1.05579	0.79797	0.79337	1.08219	0.71159			0.924309	1.05579	0.79797	0.79337	1.08219	0.71159
	64.304	102.153	51.75	81.449	54.67	56.726			0.941931	1.49635	0.758039	1.19307	0.800811	0.830928			0.941931	1.49635	0.758039	1.19307	0.800811	0.830928
	88.783	93.888	45.299	60.42	80.58	66.543			1.3005	1.37528	0.663544	0.885038	1.18034	0.974728			1.3005	1.37528	0.663544	0.885038	1.18034	0.974728
	40.655	57.979	34.02	49.217	51.847	43.845			0.595518	0.849282	0.498328	0.720935	0.75946	0.642246			0.595518	0.849282	0.498328	0.720935	0.75946	0.642246
	59.848	30.987	71.152	79.659	77.825	43.85			0.876659	0.453901	1.04224	1.16685	1.13999	0.642319			0.876659	0.453901	1.04224	1.16685	1.13999	0.642319
	38.311	59.199	77.159	50.824	47.851	36.274			0.561183	0.867153	1.13023	0.744475	0.700926	0.531345			0.561183	0.867153	1.13023	0.744475	0.700926	0.531345
	41.67	75.669	63.852	57.503	73.076	38.924			0.610386	1.10841	0.93531	0.842309	1.07042	0.570162			0.610386	1.10841	0.93531	0.842309	1.07042	0.570162
	83.624	57.795	50.212	81.281	55.189	93.34			1.22493	0.846587	0.73551	1.19061	0.808414	1.36725			1.22493	0.846587	0.73551	1.19061	0.808414	1.36725
	93.616	83.912	35.777	80.169	67.094	57.613			1.3713	1.22915	0.524065	1.17432	0.982799	0.843921			1.3713	1.22915	0.524065	1.17432	0.982799	0.843921
	58.804	72.062	57.371	45.649	67.835	81.351			0.861367	1.05557	0.840376	0.668671	0.993653	1.19164			0.861367	1.05557	0.840376	0.668671	0.993653	1.19164
	88.607	51.426	82.429	50.062	60.109	66.207			1.29792	0.753293	1.20743	0.733313	0.880482	0.969806			1.29792	0.753293	1.20743	0.733313	0.880482	0.969806
	59.272	64.19	42.593	93.428	75.998	53.145			0.868222	0.940261	0.623906	1.36854	1.11323	0.778473			0.868222	0.940261	0.623906	1.36854	1.11323	0.778473
	96.261	74.356	47.071	79.577	45.467	57.964			1.41004	1.08917	0.6895	1.16565	0.666005	0.849062			1.41004	1.08917	0.6895	1.16565	0.666005	0.849062
	97.685	85.902		89.939	73.738	37.448			1.4309	1.2583		1.31743	1.08012	0.548542			1.4309	1.2583		1.31743	1.08012	0.548542
	59.662	78.765		44.647		106.453			0.873935	1.15376		0.653993		1.55933			0.873935	1.15376		0.653993		1.55933
	50.021	61.229		65.586		66.33			0.732712	0.896888		0.96071		0.971608			0.732712	0.896888		0.96071		0.971608
		53.825		54.718		34.545				0.788434		0.801514		0.506018				0.788434		0.801514		0.506018
		62.624		44.115		45.553				0.917322		0.646201		0.667265				0.917322		0.646201		0.667265
		101.764		52.787		66.643				1.49065		0.773229		0.976193				1.49065		0.773229		0.976193
		59.428		67.701		86.766				0.870507		0.991691		1.27096				0.870507		0.991691		1.27096
		84.526		55.97		54.782				1.23814		0.819854		0.802452				1.23814		0.819854		0.802452
		80.934		50.123		53.447				1.18553		0.734206		0.782897				1.18553		0.734206		0.782897
		56.28		58.607		49.806				0.824395		0.858481		0.729563				0.824395		0.858481		0.729563
		84.58		77.249		70.8				1.23894		1.13155		1.03709				1.23894		1.13155		1.03709
		100.536		42.571		54.782				1.47266		0.623584		0.802452				1.47266		0.623584		0.802452
		37.488		71.378		78.357				0.549128		1.04555		1.14778				0.549128		1.04555		1.14778
		65.767		48.125		47.463				0.963361		0.70494		0.695243				0.963361		0.70494		0.695243
		78.987		65.885		92.156				1.15701		0.96509		1.34991				1.15701		0.96509		1.34991
		97.981		43.374						1.43523		0.635346						1.43523		0.635346
		115.419		61.198						1.69067		0.896434						1.69067		0.896434
		84.56		54.205						1.23864		0.794						1.23864		0.794
				81.59								1.19514								1.19514
				50.032								0.732873								0.732873
				81.21								1.18957								1.18957
				80.006								1.17194								1.17194
				60.662								0.888583								0.888583
				45.972								0.673402								0.673402
				76.362								1.11856								1.11856
				55.791								0.817232								0.817232
				37.98								0.556335								0.556335
				46.044								0.674457								0.674457
				40.543								0.593878								0.593878
				91.848								1.3454								1.3454
				61.204								0.896522								0.896522
				38.488								0.563776								0.563776
	average:
	68.2683	71.0661	53.6492	62.5665	57.7665	61.6857

## Sheet: Figure 4K
	HK-OP50						HK-OP50+ D-GlcA						HK-OP50+ VC
	RNAi (EV)			RNAi (dhgd-1; E03H4.3; Y39G8B.1)			RNAi (EV)			RNAi (dhgd-1; E03H4.3; Y39G8B.1)			RNAi (EV)			RNAi (dhgd-1; E03H4.3; Y39G8B.1)
	worm number		aversion index	worm number		aversion index	worm number		aversion index	worm number		aversion index	worm number		aversion index	worm number		aversion index
replicate	in lawn	out plawn	out/(in+out)	in lawn	out plawn	out/(in+out)	in lawn	out plawn	out/(in+out)	in lawn	out plawn	out/(in+out)	in lawn	out plawn	out/(in+out)	in lawn	out plawn	out/(in+out)
1	165	87	0.345238	192	142	0.42515	257	125	0.327225	226	173	0.433584	303	153	0.335526	276	109	0.283117
2	150	107	0.416342	197	208	0.51358	318	160	0.334728	315	222	0.413408	294	112	0.275862	366	160	0.304183
3	206	146	0.414773	187	205	0.522959	369	159	0.301136	281	197	0.412134	405	126	0.237288	297	123	0.292857
4	170	130	0.433333	283	192	0.404211	311	154	0.331183	298	197	0.39798	330	87	0.208633	387	126	0.245614
5	235	137	0.36828	259	199	0.434498	329	138	0.295503	274	210	0.433884	273	126	0.315789	351	172	0.328872
Tukey's multiple comparisons test	Mean Diff.	95.00% CI of diff.	Significant?	Summary	Adjusted P Value
EV:HK-OP50 vs. EV:HK-OP50+D-GlcA	0.07764	0.009396 to 0.1459	Yes	*	0.0259
EV:HK-OP50 vs. EV:HK-OP50+VC	0.121	0.05273 to 0.1892	Yes	**	0.0018
EV:HK-OP50 vs. RNAi:HK-OP50	-0.06449	-0.1327 to 0.003756	No	ns	0.0653
EV:HK-OP50+D-GlcA vs. RNAi:HK-OP50+D-GlcA	-0.1002	-0.1685 to -0.03200	Yes	**	0.0059
EV:HK-OP50+D-GlcA vs. RNAi:HK-OP50+VC	0.02703	-0.04122 to 0.09527	No	ns	0.7024
EV:HK-OP50+VC vs. RNAi:HK-OP50+VC	-0.01631	-0.08455 to 0.05193	No	ns	0.943
EV:HK-OP50+D-GlcA vs. EV:HK-OP50+VC	0.04334	-0.02491 to 0.1116	No	ns	0.2864

## Sheet: Figure 4-figure supplement 1-A
replicate	K12	HK-K12	HK-yfbR
1	0.0416335	0.0427809	0.0410642
2	0.0442589	0.0543944	0.046124
3	0.0342668	0.0471022	0.0665762
4	0.036422	0.026576	0.038987
5	0.0424564	0.0382975	0.0442599
6	0.0445723	0.0433211	0.0486273
Tukey's multiple comparisons test	Mean Diff.	95.00% CI of diff.	Significant?	Summary	Adjusted P Value
K12 vs. HK-K12	-0.001477	-0.01382 to 0.01087	No	ns	0.9483
K12 vs. HK-yfbR	-0.007005	-0.01935 to 0.005339	No	ns	0.3306
HK-K12 vs. HK-yfbR	-0.005528	-0.01787 to 0.006816	No	ns	0.492

## Sheet: Figure 4-figure supplement 1-B
replicate	HK-OP50/EV	HK-OP50/RNAi (Y39G8B.1; E03H4.3; dhgd-1)	HK-OP50+D-Glc/EV	HK-OP50+D-Glc/RNAi (Y39G8B.1; E03H4.3; dhgd-1)
1	0.025804	0.017207	0.0343513	0.0118233
2	0.0339138	0.0226149	0.0451474	0.0155391
3	0.0210118	0.0140114	0.0279717	0.00962751
4	0.0283844	0.0189277	0.0377864	0.0130056
5	0.041655	0.027777	0.0554528	0.0190861
6	0.0449726	0.0299893	0.0598693	0.0206062
7	0.028753	0.0191735	0.0382771	0.0131745
8	0.0331765	0.0221233	0.0441659	0.0152013
Tukey's multiple comparisons test	Mean Diff.	95.00% CI of diff.	Significant?	Summary	Adjusted P Value
HK-OP50/EV vs. HK-OP50/RNAi (Y39G8B.1; E03H4.3; dhgd-1)	0.01073	0.0006116 to 0.02085	Yes	*	0.0345
HK-OP50/EV vs. HK-OP50+D-Glc/EV	-0.01067	-0.02079 to -0.0005496	Yes	*	0.0359
HK-OP50/EV vs. HK-OP50+D-Glc/RNAi (Y39G8B.1; E03H4.3; dhgd-1)	0.01745	0.007332 to 0.02757	Yes	***	0.0003
HK-OP50/RNAi (Y39G8B.1; E03H4.3; dhgd-1) vs. HK-OP50+D-Glc/EV	-0.0214	-0.03152 to -0.01128	Yes	****	<0.0001
HK-OP50/RNAi (Y39G8B.1; E03H4.3; dhgd-1)vs. HK-OP50+D-Glc/RNAi (Y39G8B.1; E03H4.3; dhgd-1)	0.00672	-0.003399 to 0.01684	No	ns	0.2885
HK-OP50+D-Glc/EV vs. Column D	0.02812	0.01800 to 0.03824	Yes	****	<0.0001

[truncated: 3 more sheets: Figure 4-figure supplement 1-C, Figure 4-figure supplement 1-D, Figure 4-figure supplement 1-E]
