# Supplementary material for: UPRER–immunity axis acts as physiological food evaluation system that promotes aversion behavior in sensing low-quality food
Source: eLife. 2024 Sep 5;13:RP94181. doi: 10.7554/eLife.94181 (PMC11377039; doi:10.7554/eLife.94181)
Supplement: Figure 5—source data 1. [file elife-94181-fig5-data1.xlsx]

## Sheet: Figure 5B
	N2						xbp-1 (tm2482)						xbp-1(tm2482); rgef-1p::xbp-1						xbp-1(tm2482); ges-1p::xbp-1						pmk-1(km25)						pmk-1(km25); rgef-1:pmk-1						pmk-1(km25); vha-6p::pmk-1
	HK-OP50		HK-OP50+D-Glc		Selection index		HK-OP50		HK-OP50+D-Glc		Selection index		HK-OP50		HK-OP50+D-Glc		Selection index		HK-OP50		HK-OP50+D-Glc		Selection index		HK-OP50		HK-OP50+D-Glc		Selection index		HK-OP50		HK-OP50+D-Glc		Selection index		HK-OP50		HK-OP50+D-Glc		Selection index
replicate	worm number	Bacterial lawn area	worm number	Bacterial lawn area	HK-OP50	HK-OP50+D-Glc	worm number	Bacterial lawn area	worm number	Bacterial lawn area	HK-OP50	HK-OP50+D-Glc	worm number	Bacterial lawn area	worm number	Bacterial lawn area	HK-OP50	HK-OP50+D-Glc	worm number	Bacterial lawn area	worm number	Bacterial lawn area	HK-OP50	HK-OP50+D-Glc	worm number	Bacterial lawn area	worm number	Bacterial lawn area	HK-OP50	HK-OP50+D-Glc	worm number	Bacterial lawn area	worm number	Bacterial lawn area	HK-OP50	HK-OP50+D-Glc	worm number	Bacterial lawn area	worm number	Bacterial lawn area	HK-OP50	HK-OP50+D-Glc
1	60	1451174	79	1677943	0.467569	0.532431	43	2127876	32	2117536	0.572141	0.427859	220	1975525	362	1905493	0.369559	0.630441	291	2130920	283	2122175	0.505941	0.494059	108	1694694	99	1654605	0.515763	0.484237	93	1738150	96	1650611	0.479156	0.520844	122	1885266	117	1827921	0.502739	0.497261
2	56	1661327	102	1685633	0.357761	0.642239	43	2138572	39	1997289	0.507322	0.492678	182	1968557	286	2021006	0.395156	0.604844	324	2012210	318	2149486	0.521159	0.478841	107	1660788	109	1692192	0.500053	0.499947	132	1773369	149	1818349	0.475994	0.524006	138	1624060	120	1587320	0.529187	0.470813
3	62	1740572	72	1673445	0.452925	0.547075	39	2085519	38	2055372	0.502854	0.497146	263	2192832	324	2093862	0.436649	0.563351	310	2061579	331	2138811	0.492808	0.507192	94	1796792	114	1830245	0.456496	0.543504	141	1736785	164	1781025	0.468553	0.531447	146	1646066	138	1500017	0.490861	0.509139
4	68	1642123	92	1705444	0.434271	0.565729	35	2064050	33	2039664	0.511737	0.488263	238	2061101	224	1939205	0.499916	0.500084	312	2063515	330	1981548	0.475863	0.524137	127	1746921	117	1799852	0.527937	0.472063	137	1658012	145	1662251	0.486453	0.513547	157	1765064	126	1644783	0.537277	0.462723
5	78	1802631	87	1781033	0.469724	0.530276	99	2003828	91	1874230	0.50435	0.49565	305	2137695	342	1965587	0.450553	0.549447	300	2102797	296	2092311	0.502106	0.497894	99	1676939	125	1730251	0.449696	0.550304	118	1755115	160	1744200	0.422937	0.577063	169	1912737	170	1863473	0.492002	0.507998
Selection index = (Worm number1/Bacterial lawn area1)/((Worm number1/Bacterial lawn area1)+(Worm number2/Bacterial lawn area2)+·····）
worm number: the number of worm on bacterial lawn
Bacterial lawn area: Drop 20ul of bacterial solution on a 35 mm NGM culture plate for bacterial spots
Sidak's multiple comparisons test	Mean Diff.	95.00% CI of diff.	Significant?	Summary	Adjusted P Value
HK-OP50 - HK-OP50+D-Glc
N2	-0.1271	-0.1906 to -0.06361	Yes	****	<0.0001
xbp-1 (tm2482)	0.03936	-0.02413 to 0.1028	No	ns	0.4825
xbp-1(tm2482); rgef-1p::xbp-1	-0.1393	-0.2028 to -0.07578	Yes	****	<0.0001
xbp-1(tm2482); ges-1p::xbp-1	-0.0008492	-0.06434 to 0.06264	No	ns	>0.9999
pmk-1(km25)	-0.02002	-0.08351 to 0.04347	No	ns	0.9662
pmk-1(km25); rgef-1:pmk-1	-0.06676	-0.1303 to -0.003275	Yes	*	0.034
pmk-1(km25); vha-6p::pmk-1	-0.02282	-0.08631 to 0.04066	No	ns	0.9335

## Sheet: Figure 5C
	N2						xbp-1 (tm2482)						xbp-1(tm2482); rgef-1p::xbp-1						xbp-1(tm2482); ges-1p::xbp-1						pmk-1(km25)						pmk-1(km25); rgef-1:pmk-1						pmk-1(km25); vha-6p::pmk-1
	HK-OP50		HK-OP50+D-GlcA		Selection index		HK-OP50		HK-OP50+D-GlcA		Selection index		HK-OP50		HK-OP50+D-GlcA		Selection index		HK-OP50		HK-OP50+D-GlcA		Selection index		HK-OP50		HK-OP50+D-GlcA		Selection index		HK-OP50		HK-OP50+D-GlcA		Selection index		HK-OP50		HK-OP50+D-GlcA		Selection index
replicate	worm number	Bacterial lawn area	worm number	Bacterial lawn area	HK-OP50	HK-OP50+D-GlcA	worm number	Bacterial lawn area	worm number	Bacterial lawn area	HK-OP50	HK-OP50+D-GlcA	worm number	Bacterial lawn area	worm number	Bacterial lawn area	HK-OP50	HK-OP50+D-GlcA	worm number	Bacterial lawn area	worm number	Bacterial lawn area	HK-OP50	HK-OP50+D-GlcA	worm number	Bacterial lawn area	worm number	Bacterial lawn area	HK-OP50	HK-OP50+D-GlcA	worm number	Bacterial lawn area	worm number	Bacterial lawn area	HK-OP50	HK-OP50+D-GlcA	worm number	Bacterial lawn area	worm number	Bacterial lawn area	HK-OP50	HK-OP50+D-GlcA
1	60	1865612	80	1892513	0.432081	0.567919	44	1832259	46	2019228	0.513175	0.486825	258	2404859	313	2511182	0.462575	0.537425	354	2201987	323	2392535	0.543549	0.456451	85	1655681	88	1695296	0.49724	0.50276	128	1656771	151	1704327	0.465816	0.534184	155	1683999	86	1698734	0.64515	0.35485
2	62	1763821	78	1744351	0.44012	0.55988	26	2308094	34	2189592	0.420439	0.579561	182	2367496	214	2365759	0.459414	0.540586	296	2254432	324	2182126	0.469293	0.530707	130	1751794	107	1765354	0.550432	0.449568	135	1643409	155	1679929	0.47099	0.52901	161	1694742	167	1675871	0.488056	0.511944
3	62	1715877	78	1660368	0.434759	0.565241	41	2075596	28	2142508	0.60183	0.39817	242	2359163	229	2298805	0.507324	0.492676	328	2042592	348	2061668	0.487529	0.512471	130	1652899	115	1692891	0.536562	0.463438	138	1622954	159	1698242	0.475942	0.524058	190	1635388	126	1654061	0.603985	0.396015
4	71	1771860	91	1796710	0.441703	0.558297	36	2088856	39	2069694	0.4777	0.5223	189	2453902	224	2485744	0.460829	0.539171	368	2014751	309	2185097	0.56363	0.43637	120	1631413	147	1790487	0.472553	0.527447	126	1643191	150	1685659	0.462859	0.537141	170	1637384	139	1629704	0.548998	0.451002
5	80	1746137	84	1793432	0.494484	0.505516	34	1967808	32	2074694	0.528349	0.471651	209	2301813	313	2365627	0.406966	0.593034	333	2004867	368	2185369	0.496567	0.503433	104	1790446	100	1788867	0.509583	0.490417	135	1642514	165	1672648	0.454504	0.545496	152	1549738	150	1669550	0.521914	0.478086
6	69	1724353	73	1691038	0.481044	0.518956	45	1927804	38	2000918	0.551393	0.448607	148	2430383	259	2490412	0.369301	0.630699	318	1966042	358	2117679	0.488956	0.511044	111	1797880	102	1945594	0.540788	0.459212	70	1613383	118	1643718	0.376704	0.623296	151	1732854	138	1696362	0.517179	0.482821
Sidak's multiple comparisons test	Mean Diff.	95.00% CI of diff.	Significant?	Summary	Adjusted P Value
HK-OP50 - HK-OP50+D-GlcA
N2	-0.09194	-0.1658 to -0.01812	Yes	**	0.0079
xbp-1 (tm2482)	0.03096	-0.04286 to 0.1048	No	ns	0.8538
xbp-1(tm2482); rgef-1p::xbp-1	-0.1112	-0.1850 to -0.03738	Yes	***	0.0009
xbp-1(tm2482); ges-1p::xbp-1	0.01651	-0.05731 to 0.09033	No	ns	0.9948
pmk-1(km25)	0.03572	-0.03810 to 0.1095	No	ns	0.7438
pmk-1(km25); rgef-1:pmk-1	-0.09773	-0.1715 to -0.02391	Yes	**	0.0042
pmk-1(km25); vha-6p::pmk-1	0.1084	0.03461 to 0.1822	Yes	**	0.0013

## Sheet: Figure 5D
	N2						xbp-1 (tm2482)						xbp-1(tm2482); rgef-1p::xbp-1						xbp-1(tm2482); ges-1p::xbp-1						pmk-1(km25)						pmk-1(km25); rgef-1:pmk-1						pmk-1(km25); vha-6p::pmk-1
	HK-OP50		HK-OP50+VC		Selection index		HK-OP50		HK-OP50+VC		Selection index		HK-OP50		HK-OP50+VC		Selection index		HK-OP50		HK-OP50+VC		Selection index		HK-OP50		HK-OP50+VC		Selection index		HK-OP50		HK-OP50+VC		Selection index		HK-OP50		HK-OP50+VC		Selection index
replicate	worm number	Bacterial lawn area	worm number	Bacterial lawn area	HK-OP50	HK-OP50+VC	worm number	Bacterial lawn area	worm number	Bacterial lawn area	HK-OP50	HK-OP50+VC	worm number	Bacterial lawn area	worm number	Bacterial lawn area	HK-OP50	HK-OP50+VC	worm number	Bacterial lawn area	worm number	Bacterial lawn area	HK-OP50	HK-OP50+VC	worm number	Bacterial lawn area	worm number	Bacterial lawn area	HK-OP50	HK-OP50+VC	worm number	Bacterial lawn area	worm number	Bacterial lawn area	HK-OP50	HK-OP50+VC	worm number	Bacterial lawn area	worm number	Bacterial lawn area	HK-OP50	HK-OP50+VC
1	280	252.317	404	242.005	0.399307	0.600693	29	2071166	38	2149131	0.441929	0.558071	233	2157259	296	2178470	0.442866	0.557134	391	2228779	308	2222705	0.558698	0.441302	72	198.871	63	193.826	0.526933	0.473067	80	231.663	102	213.872	0.419981	0.580019	128	263.359	132	250.272	0.479576	0.520424
2	356	253.395	446	239.823	0.430347	0.569653	47	2083554	32	2185924	0.606441	0.393559	235	2168317	291	2257432	0.456743	0.543257	393	2132742	342	2296932	0.55309	0.44691	116	211.482	83	194.69	0.562673	0.437327	47	229.399	73	230.263	0.392563	0.607437	155	223.159	128	214.393	0.537758	0.462242
3	370	260.617	497	242.551	0.409284	0.590716	55	2063958	53	2123428	0.516356	0.483644	305	2464896	266	2474112	0.535079	0.464921	330	2109713	315	2229120	0.525372	0.474628	90	193.165	94	186.471	0.480322	0.519678	68	241.496	70	237.787	0.488886	0.511114	175	220.063	148	208.652	0.528551	0.471449
4	311	244.254	484	237.639	0.384676	0.615324	37	2042188	48	2082858	0.440147	0.559853	231	2498220	307	2510542	0.430574	0.569426	343	2202938	363	2272662	0.493622	0.506378	84	190.067	109	200.897	0.4489	0.5511	89	219.988	83	253.915	0.553105	0.446895	158	227.197	146	226.788	0.519287	0.480713
5	460	238.35	575	236.825	0.44286	0.55714	47	2070396	56	2059493	0.455001	0.544999	225	2439025	291	2462446	0.438398	0.561602	413	2083337	382	2137083	0.525851	0.474149	86	198.436	83	196.956	0.507005	0.492995	58	174.025	83	180.654	0.420429	0.579571	159	236.413	165	213.817	0.465679	0.534321
6	356	240.036	488	238.204	0.419934	0.580066	45	2201480	47	2226258	0.491927	0.508073	251	2459656	302	2539139	0.461782	0.538218	430	2296968	383	2380672	0.537813	0.462187	88	251.359	72	253.901	0.552489	0.447511	70	185.314	77	192.901	0.486207	0.513793	183	232.174	144	243.411	0.571246	0.428754
Sidak's multiple comparisons test	Mean Diff.	95.00% CI of diff.	Significant?	Summary	Adjusted P Value
HK-OP50 - HK-OP50+VC
N2	-0.1712	-0.2434 to -0.09903	Yes	****	<0.0001
xbp-1 (tm2482)	-0.01607	-0.08824 to 0.05611	No	ns	0.9949
xbp-1(tm2482); rgef-1p::xbp-1	-0.07819	-0.1504 to -0.006014	Yes	*	0.0273
xbp-1(tm2482); ges-1p::xbp-1	0.06482	-0.007357 to 0.1370	No	ns	0.1004
pmk-1(km25)	0.02611	-0.04606 to 0.09828	No	ns	0.9254
pmk-1(km25); rgef-1::pmk-1	-0.07961	-0.1518 to -0.007437	Yes	*	0.0236
pmk-1(km25); vha-6p::pmk-1	0.03403	-0.03814 to 0.1062	No	ns	0.7668

## Sheet: Figure 5-figure supplement 1-A
	N2						N2						N2
	OP50+D-Glc		OP50		Selection index		OP50+D-GlcA		OP50		Selection index		OP50+VC		OP50+VC		Selection index
replicate	worm number	Bacterial lawn area	worm number	Bacterial lawn area	OP50+D-Glc	OP50	worm number	Bacterial lawn area	worm number	Bacterial lawn area	OP50+D-GlcA	OP50	worm number	Bacterial lawn area	worm number	Bacterial lawn area	OP50+VC	OP50+VC
1	406	2127553	413	2081438	0.490249	0.509751	276	2042087	482	2006678	0.360076	0.639924	147	2197536	247	2211711	0.374602	0.625398
2	399	2129456	588	2068669	0.3973	0.6027	448	1979636	644	1856626	0.394829	0.605171	146	2252610	188	2245248	0.43632	0.56368
3	478	2226171	629	2022353	0.40841	0.59159	336	2015374	718	1885803	0.304532	0.695468	148	2227531	238	2288613	0.389835	0.610165
4	485	2150483	621	2067664	0.428872	0.571128	259	2012653	645	1936863	0.278723	0.721277	120	2249072	121	2306745	0.504255	0.495745
5	627	2141630	555	2099627	0.525521	0.474479	402	1579472	631	1655830	0.400438	0.599562	157	2315698	168	2328004	0.484401	0.515599
	t` test	P value	P value summary				t` test	P value	P value summary				t` test	P value	P value summary
	OP50 vs. OP50+D-Glc	0.0215	*				OP50 vs. OP50+D-GlcA	<0.0001	****				OP50 vs. OP50+VC	0.0086	**

## Sheet: Figure 5-figure supplement 1-B
	N2						N2						N2
	buffer+D-Glc		buffer		Selection index		buffer+D-GlcA		buffer		Selection index		buffer+VC		buffer		Selection index
replicate	worm number	Bacterial lawn area	worm number	Bacterial lawn area	buffer+D-Glc	buffer	worm number	Bacterial lawn area	worm number	Bacterial lawn area	buffer+D-GlcA	buffer	worm number	Bacterial lawn area	worm number	Bacterial lawn area	buffer+VC	buffer
1	28	1219976	39	1257459	0.42529	0.57471	34	1578498	45	1681263	0.445905	0.554095	52	1629266	68	1742379	0.449883	0.550117
2	44	1175241	39	1218612	0.539137	0.460863	41	1592212	51	1669182	0.457343	0.542657	42	1610867	48	1740830	0.486018	0.513982
3	4	1241955	4	1282133	0.507959	0.492041	70	1636307	83	1711229	0.468647	0.531353	38	1695265	41	1665333	0.476567	0.523433
4	47	1233932	67	1314621	0.42771	0.57229	46	1603519	74	1716396	0.399536	0.600464	61	1736766	87	1865500	0.429589	0.570411
5	35	1235093	35	1266907	0.506358	0.493642	49	1707086	81	1808165	0.390525	0.609475	56	1700959	44	1799314	0.573801	0.426199
	t` test	P value	P value summary				t` test	P value	P value summary				t` test	P value	P value summary
	buffer vs. buffer+D-Glc	0.2856	ns				buffer vs. buffer+D-GlcA	0.0003	***				buffer vs. buffer+VC	0.3643	ns

## Sheet: Figure 5-figure supplement 1-C
	N2			kgb-1 (km21)
	worm number		aversion index	worm number		aversion index
replicate	out lawn	in lawn	out/(in+out)	out lawn	in lawn	out/(in+out)
1	241	399	0.376563	175	220	0.443038
2	254	371	0.4064	166	301	0.35546
3	259	396	0.39542	180	251	0.417633
4	170	238	0.416667	147	255	0.365672
5	230	430	0.348485	161	270	0.37355
6	208	226	0.479263	94	254	0.270115
	t` test	P value	P value summary	Significantly different (P < 0.05)?
	kgb-1 (km21) vs. N2	0.3033	ns	No
