# Supplementary material for: UPRER–immunity axis acts as physiological food evaluation system that promotes aversion behavior in sensing low-quality food
Source: eLife. 2024 Sep 5;13:RP94181. doi: 10.7554/eLife.94181 (PMC11377039; doi:10.7554/eLife.94181)
Supplement: Supplementary file 1. [file elife-94181-supp1.xlsx]

## Sheet: Supplementary File 1a
	HK-K12				HK-yfbR				Live-K12
Compounds	HK1	HK2	HK3	HK4	HY1	HY2	HY3	HY4	Con1	Con2	Con3	Con4
Prilocaine hydrochloride	56323000	53600000	53643000	51737000	56405000	40983000	60703000	57109000	938110	783820	981750	1069700
Sodium cholate	9	9	9	9	9	9	9	9	54526	38124	45024	50115
Sodium Demethylcantharidate	179580	291100	239030	282580	153040	190900	157790	195390	4424800	2732900	1101100	3025300
D-Phenylalanine	19653000	20828000	20462000	22818000	19412000	19286000	21264000	22836000	8718200	8011100	7859600	8198600
Lidocaine hydrochloride	8885600	12166000	7825600	11682000	20812000	11431000	22154000	20148000	473580	436040	316950	510820
3,4-Diaminopyridine	2750700	1554800	1137800	2634300	1235200	2939900	2142900	1223300	2648500	2672000	1705000	2695800
VitaMin U	247060	261620	333640	283240	294560	244680	233280	266110	489480	438620	766550	578890
L-Prolyl-L-Phenylalanine	5512500	4650000	4438600	6396400	5656700	4717300	6732700	7236600	86137	66859	90725	74544
Aspartyl valine	207850	144780	214560	214890	163630	204600	133840	170820	41922	47876	25988	67971
(+/-)-High Proline	641920	667040	440400	529020	614410	430240	712350	699300	76014	45014	53603	53906
Proline Hydroxyproline	17596000	18093000	18021000	19639000	18519000	18501000	21048000	19533000	326970	372880	554890	596540
DL-Arginine	101930000	127860000	119540000	111940000	137590000	103290000	107740000	125440000	2206300	2069000	3157100	2645500
Glu-Phe	92555	103580	79476	103220	60852	42874	61983	64662	13190000	5085100	7165900	5927700
Glu-Trp	1751500	1982300	1900400	2330700	2214300	1492000	2148200	2243200	71991	57531	100440	85440
1-Oleoyl-sn-glycero-3-phosphocholine	9685200	6024200	6982100	11121000	26402000	17017000	28614000	24964000	621040	346860	415900	357440
Confertifoline	28187	29508	32904	27569	30890	35668	37508	35121	35125	28783	29517	29923
Maritimetin	333270	339740	351410	353410	357360	363820	363780	372640	394740	375640	382700	405400
Isothankunic acid	19572	15825	14059	15845	77660	52038	74145	62323	17961	19034	18052	23033
Nordihydrocapsiate	1518900	1328900	1637200	1163700	949350	1039000	1248100	853280	1235000	787240	1068000	1153600
[6]-Shogaol	178380	75051	39191	261180	23439	49545	370400	122480	22720	21810	21906	22114
9,10,18-Trihydroxystearic acid	41540	35082	51837	47870	122990	79554	99764	122450	24034	19974	21277	19293
Nordihydrocapsaicin	1984100	2050700	2023700	2150800	2084900	2052000	1999300	2031800	2014700	2113500	2213100	2234800
Trehalose 6-phosphate	219350	326530	188630	235980	52782	54759	52480	62707	511820	332270	370180	350150
1,7-Dihydroxyxanthone	39785	26888	41532	45339	150070	98954	212010	165410	20317	19922	14702	15970
Moracin M	25876000	24595000	23622000	22636000	19076000	21393000	21049000	19614000	4007900	5500300	4520000	4555000
Perlolyrine	1028000	752200	1134800	1251000	3153900	2208500	2985400	3249000	180410	156240	185820	131680
6-Deoxyfagomine	13738000	13419000	14025000	14809000	5814700	11129000	10490000	12137000	2250000	1386500	1761900	1979500
12-Oxo-10E-Dodecenoic Acid	65363	59291	54886	70588	59821	43022	62322	69511	3673.6	5348.4	4223.4	5405.6
L-Threonine	1036300	845310	1181500	1001900	540020	968240	467880	635470	42977	63834	45541	49885
L-Aspartic Acid	4894900	5039500	5619800	4214200	2778600	3844500	2489300	2783200	4252300	4126800	3554200	4025800
3-N-Methyl-L-Histidine	54157	65014	42867	45059	9	9	9	9	214440	217320	153850	199310
4-Hydroxy-glutamic acid	33181	30265	38470	41055	9	9	72193	58372	70633	59513	29982	87459
Allantoin	563630	640640	503900	477990	388860	337280	443600	490880	3581600	3780900	4773100	3503500
Ala-Ala	223040	312620	225330	290090	83531	87981	78488	88708	360860	492320	241110	148990
N-Acetylaspartate	67698	101640	68639	68592	78092	58973	81412	65279	46546	27237	33441	56869
N-Acetyl-L-Leucine	1624100	1660300	1527100	1709200	1392000	1188900	1400300	1530700	1044500	1609200	1183100	735800
N-Phenylacetylglycine	119650	101940	109050	113510	113150	91887	114630	118720	23586	15296	15769	8137
N-Propionylglycine	3321000	2993000	3020200	3367100	2998600	3231600	3067700	3274400	577850	494700	551760	535140
O-Phospho-L-Serine	9	9	19760	34758	9	9	9	16202	448340	242730	119140	319510
Terephthalic Acid	1344500	1286300	1388500	1287200	1429400	1497300	1229100	1459900	1410900	1516000	1166500	1075300
2-Picolinic Acid	1934300	1730900	1741300	2167900	1445500	1544700	1458000	1596700	2406000	2358000	3771500	2494600
Dulcitol	14713	19149	32262	14065	31329	29611	41058	28665	729470	995480	1200800	1040400
4-Hydroxy-3-methoxybenzaldehyde	66107	44869	55211	56311	61199	50833	64709	74041	32987	36201	35814	21023
Thiamine Pyrophosphate（TPP）	9	5191	5238	9	9	9	9	9	47336	77767	34573	36839
Xanthine	3612400	1689200	2435000	4378800	5429400	6942400	5998300	6507100	7780900	3599100	8267600	4328900
5-Hydroxymethyluracil	137160	169260	153690	131210	154530	132460	193470	152080	45984	78622	66110	46031
7-Methylxanthine	7481.3	2378.6	5772.9	6376.3	2544.2	9	9	9	54745	30651	49660	25731
Adenosine 5'-Monophosphate	303960	561620	174360	558160	56502	59897	38635	36729	1000500	674050	730700	655280
Deoxyguanosine	53101	51355	33344	59202	16313	27623	12347	20181	57268	43501	39766	41400
Flavin Adenine Dinucleotide(FAD)	101290	115040	58886	111780	21412	17503	17227	26730	715630	606390	576770	675970
Inosine 5'-monophosphate	19890	36851	17673	38636	9	9	9	9	74827	53240	59228	59513
Thymidine	5887.9	7828.2	3423.8	3886.5	9	9	9	9	9009.6	9191.1	8955.1	6721.9
Uridine	118200	113050	89582	117790	50989	45947	55566	68169	214170	260600	239110	205310
Pyridoxal 5'-Phosphate	9	9	9	9	9	9	9	9	2457600	1967000	1937200	2602000
Citric Acid	2375200	2487800	2322000	2495400	2409800	2542900	2590600	2701500	87750	78960	55999	65407
Succinic Acid	1122500	1162500	1118100	1103200	911780	852690	920660	1004400	770990	396830	385640	756310
Citramalic Acid	68100	63865	62323	78599	60428	51173	45389	64997	78520	43098	45147	59776
Tryptamine	99829	85400	96221	81161	389340	289220	391450	415720	40578	49718	64093	62037
1,5-Anhydro-D-Glucitol	9	9	9	9	9	9	9	9	22281	23042	27765	29309
D-Arabitol	29699	13926	17933	13382	7561.1	12902	10688	7784.9	101280	146900	86571	82725
D-Glucose	290380	300670	296260	256600	223980	243770	247680	268120	846390	863220	691170	760610
D-Melezitose	9	9	9	9	9	9	9	4134.4	155300	153110	101300	110410
D-Trehalose	5445.4	4758.9	10206	8699	286830	212450	260740	276190	266990	189960	123960	139020
D-Erythronolactone	31594	33662	36701	32276	45627	42523	35449	29175	30001	18618	22879	15879
D-Glucose 6-Phosphate	120780	120750	132370	95965	120070	201060	154280	158490	42854000	27432000	26454000	44390000
N-Acetyl-D-Glucosamine	182570	164800	185880	232810	275030	238080	266510	229690	270580	266430	241080	238100
D-Glucoronic Acid	9	9	9	9	9	9	9	9	67327	58813	70872	66774
D-Gluconic Acid	5533	5837.4	6370.7	4361.9	3916.6	5208.2	5203.5	6653.7	856830	1026000	712530	745080
L-Gulonolactone	14285	14143	11333	5526.5	7766.9	16721	12517	2719.7	32167	25727	28983	20564
Orotic Acid	66875	62959	55676	83245	41826	47114	56720	40517	2094500	1680600	1625600	2162600
Pantothenate	1754600	1895200	1668000	1992800	1500500	1362700	1524200	1832500	3918200	3544900	3251700	3487900
Indole-3-Carboxaldehyde	221220	182770	200490	219590	239080	217510	299300	291140	8018.8	9764.3	7632.1	8131.3
2-Aminoethanesulfonic Acid	92024	48442	79739	90396	47072	45246	115050	115930	89911	107520	88769	83991
2-Hydroxybutanoic Acid	117420	117290	125560	139210	137490	115100	143910	132940	589660	949530	1305400	1182700
2-Hydroxyisocaproic Acid	67027	71090	57779	79103	33596	26001	30074	35194	43677	38937	17015	55580
2-Methylsuccinic Acid	9779.3	11594	12963	10777	12000	7951.9	9240.8	16763	384180	415300	404190	435070
3-Hydroxypropanoic Acid	19533	20520	24371	25312	36132	43161	42849	38170	235780	86532	121720	378240
Adipic Acid	41420	29312	38214	21701	25677	20522	40817	63869	54177	61418	48432	52490
Azelaic Acid	757780	735460	796550	755890	729850	730770	848980	765930	1106300	1131300	1018100	1072900
Creatine	9	9	9	9	9	9	9	9	45834	31586	36183	43362
Glutaric Acid	9779.3	11594	12963	10777	12000	7951.9	9240.8	16763	384180	415300	404190	435070
Kynurenic Acid	187190	198860	171660	213450	168980	127500	179030	186300	91981	91907	84009	98445
L-Lactic Acid	19533	20520	24371	25312	36132	43161	42849	38170	235780	86532	121720	378240
Malonicacid	117420	117290	125560	139210	137490	115100	143910	132940	589660	949530	1305400	1182700
Phenyllactate(Pla)	526670	561510	451300	548050	168070	156890	165660	184600	2325300	2386700	2201600	2039100
Pyrrole-2-Carboxylic Acid	12903	18250	14857	17145	17136	14652	16878	18106	31914	29516	32644	29396
Shikimic Acid	58009	58695	63642	65598	65737	60859	62765	83017	9	9	9	9
Subericacid	38436	34749	34918	39762	41769	45501	36184	38648	67038	68827	65699	57933
O-Phosphorylethanolamine	400180	464060	377970	443620	389910	494420	474310	481380	87364	85662	52016	73775
LPS(22:6/0:0)	97689	100670	107970	88406	97067	137160	101970	122650	109880	114130	116990	116780
LPE(18:1/0:0)	282540	252950	236750	338540	1312500	1385000	1504000	1795000	19294	12374	9284.6	13691
LPE(18:0/0:0)	502550	459090	410080	442350	1345800	1382900	1614000	1786100	39698	24558	25678	32507
LPE(16:0/0:0)	410340	367820	329740	421980	599060	656120	776790	848440	35320	22809	23643	29999
LPE(14:0/0:0)	588280	519430	474800	664180	1105300	1003200	1272100	1303600	18871	8717.2	12584	14837
9,10-DiHOME	20317	12681	14960	15552	16253	16509	22632	22058	11326	9682.2	7448.9	7363.3
FFA(16:1)	5651600	2460000	2615300	6071100	10158000	9114800	6937000	9751800	141590	67870	24926	44187
FFA(16:0)	12597000	20860000	19489000	9524600	16006000	20216000	22533000	24199000	2530100	3780800	7584600	5598200
FFA(18:2)	372190	178350	157050	412770	877650	743760	590440	775680	4233.9	3854	6653.6	7084
FFA(12:0)	1279900	953250	1201900	1297800	1442700	1412900	1536800	1772800	74942	71063	66105	84188
DHA	541140	448190	453140	563760	340290	353530	375290	499380	24726	19514	22058	17805
Urocanic Acid	13927	12680	12501	14780	13526	9573.3	25068	9900	127610	119190	119070	131890
4-Hydroxybenzaldehyde	635060	629900	603290	704410	1332900	1287800	1595600	1569400	122010	115820	106690	112500
2-(Formylamino)Benzoic Acid	396540	358130	377210	382290	386200	400340	540790	499560	225490	254730	227310	292650
(Rs)-Mevalonic Acid	78600	70091	85158	85918	86119	76483	83452	92555	9	9	9	9
Uridine 5-Monophosphate	158130	224110	114820	170460	26926	29184	25225	32128	536850	295210	310110	193790
5-Hydroxyhexanoic Acid	3384600	3515800	2892800	3481500	1753100	1592600	1783600	1855000	10776000	9582700	8705700	7550300
Β-Pseudouridine	838240	814740	574830	850660	276640	291250	291920	342580	1528400	1677900	1578700	1785600
Orotidine	9	9	9	9	9	9	9	9	39830	40022	44146	38898
D-Sedoheptuiose 7-Phosphate	32178	36943	34077	34361	42934	51613	58730	34689	58164	52687	62485	53230
D-Fructose 6-Phosphate-Disodium Salt	82083	69612	52360	50754	81893	123840	85955	93197	15970000	10637000	10289000	17228000
Aminomalonic Acid	3931900	4048300	3898900	3991300	3019500	3015500	3303100	3557100	2642900	1494900	1366800	2828400
Dl-Glyceraldehyde3-Phosphate	9	9	9	9	9	9	9	9	6015100	3780400	1190600	8415900
D-Fructose-1,6-Biphosphate-Trisodium Salt	86612	94246	48977	53073	41886	63400	52916	71720	4282400	3104600	1422500	5663400
8,15-Dihete	2933800	921640	794320	3981400	3880400	3244200	2085600	3066600	115970	45229	9051.5	32697
N-Acetylmethionine	31331	30692	29807	29411	23800	20294	25533	30981	50788	98013	79095	43213
Ribulose-5-Phosphate	1263000	1477900	1153600	1111600	299980	544370	366190	322380	25069000	15444000	8513000	11795000
Argininosuccinic acid	351290	487680	307170	241600	112420	117460	98928	120990	12915000	10421000	6923400	10580000
2-Deoxyribose 1-Phosphate	15302	25593	9	9	14619	13293	16056	13346	127930	147810	186450	144670
N-Acetylglucosamine 1-Phosphate	9	9	9	9	9	9	9	9	233530	396380	301020	280960
Indole-3-lactic acid	12052	8087.5	7900.1	12343	9	9	9	9	9	9	5739.9	5624.4
Xanthosine	64498	49439	60031	65074	267590	182740	249350	335980	1036900	1016600	1589400	1487000
ADP-ribose	3486000	4354400	2710100	3755600	656960	747660	560830	687820	1148900	778330	1029500	960310
UDP-glucose	447930	541240	389330	660440	561800	709570	634580	688350	31493000	25587000	20980000	18045000
2-(4-Hydroxyphenyl)ethanol	433760	324720	418920	357860	320730	328540	417570	449910	850200	997600	746630	964330
Hydroxyphenyllactic acid	106380	133720	84884	130700	38645	25741	41518	47998	387710	400310	388560	373020
Indole-3-carbinol	50438	50493	48918	55577	40973	42349	56577	53360	19259	16333	14742	20162
L-Erythrulose	204500	205190	198460	238720	203920	178360	237880	225420	28660	16459	25959	16461
N-lactoyl-phenylalanine	441190	427950	419090	467560	499920	380620	496990	530290	18219	16528	19275	25479
N-Acetyl-L-alanine	560860	496130	548120	532880	575520	532240	590130	606000	47332	68449	58778	52631
Glycerophosphoric acid	35837000	37883000	32266000	27688000	14533000	30450000	15680000	17730000	43703000	39915000	29458000	24175000
D-Malic acid	82237	119620	52144	121510	30976	17796	35577	36081	710570	199970	275920	540260
deoxyguanosine 5'-monophosphate(dGMP)	303960	561620	174360	558160	56502	59897	38635	36729	1000500	674050	730700	655280
Tetradecanedioic acid	24874	21989	25555	19549	27204	24311	23609	24259	32337	35744	33773	34754
Carbamoyl phosphate	806690	755270	685760	905610	1267500	1460300	1344200	1468600	128760	132050	92320	111870
Porphobilinogen	2864200	2712400	2909900	2345900	2236600	2625900	2559200	2542500	2813400	3948100	3920800	3476700
5'-Adenylyl sulfate(APS)	14911	17082	12025	19313	9	9	9	9	623040	199020	218010	447100
N-Oleoyl Glycine	46671	40047	49348	43375	39198	37130	40880	39546	45955	45943	48582	43298
Ginkgoic acid	47762	52726	36963	36779	118140	74855	136580	117130	76477	64135	28275	57990
Anthranilic acid	96287	97685	75912	98440	113750	98982	126980	133350	9	9	9	9
Indoleacetaldehyde	873570	680410	770060	786020	3313400	2434800	3333500	3462900	365300	423080	542000	467890
Hexadecanedioic acid	113630	100540	94398	105270	63800	63168	66622	76603	49848	57069	53931	49962
Ethylsalicylate	5591800	5177600	5703300	4650800	4435900	4751000	4763800	4828000	5611400	7621600	6597100	6518700
Octadecanamide	31898	36626	31933	27902	25204	18587	23676	22391	46100	47499	34606	29104
2,5-Furandicarboxylicacid	3704700	3403300	4069000	3821000	3255000	3648100	3874700	3708900	2890700	3377100	2977800	3406500
4-Hydroxybenzyl alcohol	24956	25068	25010	29948	8878.1	13109	11837	16147	26638	40033	41726	41879
Methanesulfonic acid	302190	361670	294040	315280	273500	213500	323800	283480	43483	37962	32306	69518
Methylparaben	42781	30299	40663	44224	32408	38308	45364	46191	15514	17683	12561	14482
11,12-EET	1849.3	1715.2	2243.4	1174.1	2113	2336.8	3035.8	3351.6	7106.1	5282.6	5936.1	4842
11-deoxy PGE1	67885	62046	62693	72268	49039	52681	57593	59003	44390	47815	45303	49767
9,10-EpOME	94637	86767	85398	73797	100330	112890	92963	89246	138550	150790	120670	159010
FFA(9:0)	16086	13473	14955	17872	13785	15536	11975	14048	16251	16632	9997.5	12422
N-acetyl-beta-alanine	589410	583220	624850	560380	647030	533440	596480	725190	67311	81715	56540	62220
3-Hydroxyglutaric acid	28008	30638	39306	45967	20763	24425	26215	22003	32465	11571	20634	23950
Cysteine glutathione disulfide	191220	196560	183710	125290	56070	57402	56890	67420	657200	245070	387820	280110
N-acetylornithine	8631200	8304500	8411600	9311600	8792500	8568600	9432300	9203800	284810	271880	216850	214250
D-Glucosamine 6-Phosphate	10174	11462	7982.8	10816	9	9987.7	11154	10519	84473	81761	79987	107160
3-Dehydroshikimate	203050	178060	174960	223620	197120	171100	256320	208340	53770	44205	52898	65521
Stachyose	9	9	9	9	9	9	9	9	75021	121420	36150	62071
Indole-3-Ethanol	217250	175590	193370	211310	67532	54600	67772	79244	8957.5	6058.5	6932.9	6536.3
2',4'-Dihydroxyacetophenone	42781	30299	40663	44224	32408	38308	45364	46191	15514	17683	12561	14482
Uric acid	243350	208310	174430	251410	123990	129770	141380	135630	44230	28956	65691	42909
3-hydroxyphenylacetic acid	9399.6	12490	10153	12361	7116.4	5157.8	10236	7995.3	513520	549940	497490	530560
7-Methylguanine	9	9	9	4405.9	9	9	9	9	5565.6	7705	6477.7	3669.8
3-(4-Hydroxyphenyl)-Propionic Acid	5888100	5592000	6032700	5865900	5703800	6517100	6311600	6342300	6789800	7227300	6486100	6432100
5,6-Dimethylbenzimidazole	143390	110510	130070	109670	510590	461870	518040	527520	66539	79099	83517	79988
13(R)-HODE	79600	53702	78670	76419	179570	153540	106810	191490	15078	15402	10536	18330
2-Amino-4,6-pteridinediol	194630	184200	122320	207790	21406	39256	32422	35330	117560	62539	91885	61651
Tetranor-12(R)-HETE	2392300	3644300	3452400	2623900	5923800	4749600	7760700	6388900	2223100	5228900	2806500	2235700
D-Calcium Pantothenate	10634	14425	8446.3	17153	6648	6059.5	8446.2	11855	70687	77128	73491	81875
Iminodiacetic acid	4282700	4189800	4824800	4663700	2683200	3605000	2473200	2499900	3394300	3519500	3539700	3267300
Gly-Val	148030	87967	159140	135150	91778	105110	134620	180550	7331.9	6083.7	8585.8	8915.7
N6-isopentene adenine	41658	38444	35205	42749	84018	72019	80799	84497	11750	12278	9430.4	9199.7
cis-EODA	410080	408930	494540	462840	456240	455980	454230	467350	434700	412410	420430	413900
UDP-D-galactose	447930	541240	389330	660440	561800	709570	634580	688350	31493000	25587000	20980000	18045000
4-acetoxyphenol	2375800	1200800	1673700	3197800	4113300	4463300	4433500	4389600	5807700	2557700	4658900	3392800
1,6-anhydro-β-D-glucose	12205	17170	11069	5666.9	4428.8	8841.7	7632.8	7828.1	189870	185490	159070	173760
16-Hydroxyhexadecanoic acid	258010	197550	213830	244630	493310	408210	633610	607400	150620	166880	175120	97573
Uridine-5'-diphospho-N-acetylgalactosamine disodium salt	55812	66091	40465	59857	48685	46915	49805	48771	586490	355140	348690	345930
Trans dehydrorosinone	9	9	9	9	9	9	3138.3	2351.8	9696.3	9455.7	8614.5	11769
N,N′-dicyclohexylcarbodiimide	19801000	17406000	19523000	19812000	46424000	34725000	30409000	46757000	12311000	11506000	11508000	11411000
DL-2-hydroxystearic acid	28604	32196	34511	21765	29156	29655	49012	60016	17965	23243	30363	6403.8
P-chlorophenylalanine	651500	643350	736650	667170	671490	729440	659040	721450	561120	603850	595230	584440
2-hydroxyhexadecanoic acid	258010	197550	213830	244630	493310	408210	633610	607400	150620	166880	175120	97573
N-hexadecyl hydroxyproline	55893	34070	44696	87260	524460	550180	567600	699460	9	9	9	9
FFA(15:1)	188500	288150	355730	153250	150860	120190	248130	217310	422220	576080	548870	71482
4-Hydroxybenzoic Acid	494900	490110	453000	437920	368290	454800	442250	494150	976730	1068200	920390	1124900
Multifidol	15648	10691	10232	9258.4	8166.9	11521	12710	9881.5	19028	21393	19374	18704
7alpha,12beta-Dihydroxy-5alpha-cholan-24-oic acid	9	9	9	9	9	9	9	9	12619	3758.8	9251	2857.6
2-(4-hydroxyphenyl) propionate	591480	603100	473090	566700	188410	176480	184830	211140	2370500	2630000	2394500	2269600
Bis(1-inositol) -3,1'-phosphate 1-phosphate	9	9	9	9	9	9	9	9	20223	19256	24449	31029
2-amino-4-oxovaleric acid	589410	583220	624850	560380	647030	533440	596480	725190	67311	81715	56540	62220
L-2-amino-6-oximelic acid	309870	313270	287810	335200	354670	289670	337890	325870	1571300	1103800	1215400	1430800
Cyclic ADP ribose	169290	179770	105190	154950	31509	41199	36471	39598	5479400	4265100	4694700	4558300
5-O-(1-carboxyvinyl) -3-phosphate	528260	792040	412900	764830	86941	107480	98633	118800	1741900	1076300	1296900	919460
2-(α-D-mannosyl) -3-phosphate glyceride	113120	218210	70378	199160	21034	10653	22146	21496	418580	265970	332950	312910
3-(pyrazol-1-yl) -L-alanine	1866300	1758100	1813200	1974700	1540600	1497100	1506000	1680600	5757600	4026400	4242700	4703100
1-pyrroline-4-hydroxy-2-carboxylate	629990	619840	687050	679550	751520	650640	729600	735340	21211	31421	30975	27534
LPE(22:6/0:0)	38330	27390	26155	30930	20356	22994	44512	55153	20282	18387	12896	14893
LPE(0:0/20:2)	23784	17193	13474	27108	104760	91279	101110	152980	9	9	125.52	9
LPE(20:2/0:0)	23784	17193	13474	27108	104760	91279	101110	152980	9	9	125.52	9
LPE(20:4/0:0)	50991	20020	27902	38017	980840	774150	1061800	1235700	15062	3561.1	6163.5	4786.2
LPE(0:0/18:0)	502550	459090	410080	442350	1345800	1382900	1614000	1786100	39698	24558	25678	32507
LPE(0:0/18:2)	731350	718940	614080	916270	7764500	6991000	9010000	11086000	39807	29065	29051	30290
LPE(0:0/16:0)	410340	367820	329740	421980	599060	656120	776790	848440	35320	22809	23643	29999
LPE(0:0/16:1)	84518000	76717000	63160000	91219000	172920000	164230000	173870000	159350000	1013000	315370	331380	410560
Glycine linoleate	5505.8	7868.9	9947.7	10863	30693	6875.8	10797	13765	1636.1	1982.6	1289.9	1569.6
D-Inositol-1,4-diphosphate	9	9	9	9	9	9	9	9	3329800	1436700	972360	4491300
2-hydroxyphenylacetic acid	70887	70069	63081	66555	63825	54265	67874	71728	80019	79361	74248	86934
4-Hydroxy-3-methylbenzoic acid	70887	70069	63081	66555	63825	54265	67874	71728	80019	79361	74248	86934
2-Hydroxy-2-methylbutyric acid	91311	92910	83847	94833	48791	52299	57075	63249	36861	30752	33130	41175
(S)-Leucic acid	488180	496720	402600	497470	254940	230550	264040	279890	1553400	1432600	1251500	1081900
Adenosine-5'-Diphosphoglucose	24445	34684	18688	22021	4724.1	8910.2	7136.5	11023	41765	27400	29047	21241
8-Aminooctanoic Acid	20797	17939	17267	21059	70776	64385	80855	78697	12841	6318.9	11832	13365
Tridecanedioic acid	73893	69441	73045	71030	100950	67680	125240	63148	81929	105470	79710	98554
N-Palmitoylglycine	85683	65069	78178	98316	153650	118000	166340	170740	53048	51295	60908	45574
13(S)-HOTrE(γ)	48765	37875	28959	22829	10266	15576	26976	22987	8580.3	13927	10682	10550
9(S),12(S),13(S)-TriHOME	55112	46469	44231	58273	56656	47141	54976	72025	192540	141460	148380	167030
Sorbitol 6-phosphate	9	9	9	9	9	9	9	9	11830000	9228800	11673000	17444000
Allantoic acid	9	9	9	9	9	9	9	9	14019	14804	15537	7354.4
D-Mannitol 1-phosphate	82436	52360	92211	67697	297180	600690	306460	561200	68821000	57117000	60717000	83360000
Glu-Gln	434930	489160	634460	434040	653660	597370	534970	572500	44568	36100	18189	39750
N-palmitoyl taurine	756220	509980	834170	953760	2596900	1640200	2541000	2543400	15441	9178.3	11835	7903.9
N-Arachidonoyl-L-Alanine	200110	124980	190100	268630	510980	345820	614030	601520	2589.8	2103.8	2372.7	2052.3
Ethionamide	2778100	2514500	2880900	2270600	2204100	2306400	2451700	2391900	2776500	3766000	3443800	3195900
Glycerophospho-N-Arachidonoyl Ethanolamine	3083000	2911400	3191300	3258600	2433500	2370500	2678700	2973100	2435200	2152000	2458900	2411000
FFA(16:2)	9141.6	6606.9	7364.5	6999	3976.6	12450	12297	14759	10205	9672	8820.7	9089.3
(R)-(-)-Mandelic acid	9	9	9	9	9	9	9	9	64789	69740	65515	66358
(R)-3-Hydroxybutanoic acid	11164	9684.9	10077	10535	15786	9571	9658.7	12303	53276	64289	91105	86027
2-Hydroxyhexanoic acid	3384600	3515800	2892800	3481500	1753100	1592600	1783600	1855000	10776000	9582700	8705700	7550300
2'-O-methyluridine	9	9	9	9	9	9	9	9	70916	73868	61740	61032
3-Hydroxycinnamic acid	55011	49652	49510	49095	49808	54901	52820	51144	58104	55031	60667	53818
5-Hydroxy-2'-deoxyuridine	118200	113050	89582	117790	50989	45947	55566	68169	214170	260600	239110	205310
6-Hydroxyflavone (6-HF)	30008	23445	7038.9	42245	9	9	19022	48108	9	10691	9	9
Acetylvaline	24686	29025	28081	29667	18731	17817	21781	25008	83944	84725	82461	69280
Cyclo(his-pro)	445340	369050	360510	538090	367060	365980	400910	437710	9	9	9	9
D-(+)-Cellobiose	117420	117290	125560	139210	137490	115100	143910	132940	589660	949530	1305400	1182700
D-Galacturonic Acid	9	9	9	9	9	9	9	9	67327	58813	70872	66774
Dimethylmalonic acid	9779.3	11594	12963	10777	12000	7951.9	9240.8	16763	384180	415300	404190	435070
GalactinolHydrate	117420	117290	125560	139210	137490	115100	143910	132940	589660	949530	1305400	1182700
Genipin	5302.6	4482.3	4432.9	5938.5	2492.4	4570.1	4238.7	9	53600	59346	46908	46202
Glycogen	9	9	9	9	9	9	9	9	75021	121420	36150	62071
Val-Ala	101310	95956	114130	101490	113690	97415	108970	110320	156080	154750	139740	152620
Isethionic acid	7731.9	7305	8079.5	6466	9	9	9	9	24286	13257	18011	26904
Phosphonoacetic acid	39316	53044	43706	43024	9	9	9	9	1820400	1402100	937770	1129700
Sucrose 6′-monophosphate	48020	9	9	9	9	9	9	9	417170	393120	456140	375560
Thymidine-5'-phosphate(dTMP)	246520	345050	190650	276840	30887	40790	31185	49945	402250	307100	356760	342100
Xanthosine-5'-monophosphate	13883	17636	14016	17802	9	9	9	9	66536	49835	85801	56622
3-Deoxyguanosine	39942	44018	30787	24722	4764	19322	10895	24397	61995	38759	36124	49127
3-hydroxy-tetradecanoic acid	68404000	61253000	59266000	74825000	41683000	46236000	48632000	58117000	469590	380880	240840	240750
Acetanilide	69462	82498	66178	73634	30389	31878	31746	33187	471470	444350	446000	362240
Cytidine 2',3'-cyclic monophosphoric acid	124580	99951	121440	106430	84585	108690	133790	124440	206840	202900	194150	200740
D-Arabinose 5-phosphate	1386400	1542400	1230200	1178800	267720	573320	413060	402540	29050000	16189000	9303400	13796000
Ile-Pro-Ile	696360	621410	694400	715480	449110	527870	369860	609880	9	9	9	9
Isocitric acid	2375200	2487800	2322000	2495400	2409800	2542900	2590600	2701500	87750	78960	55999	65407
UDP-xylose	9	9	9	9	9	9	9	9	103120	97346	83119	76020
Glu-Thr	1545800	1392400	1647100	1425900	1099500	1197500	1165600	1355200	139100	122520	111820	137300
D-Glucose 1,6-bisphosphate	6512.5	8480.1	8862	14809	9109.4	6012.2	8137.5	10829	375000	239620	207840	537620
Gemfibrozil	62321	49603	96523	78683	13814000	9045900	436380	18449000	69589	52401	37255	39849
N-AcetyTryptophan	5290.3	4375.2	4434.8	5623.2	5871.1	3945.2	4785.5	5391.9	2619.3	9549.2	8124.2	3899.7
2-Deoxyribose-5'-phosphate	9	9	9	9	16936	25745	48673	9	9	29108	25899	7849
Uridine 5′-diphosphoglucuronic acid	9	9	9	9	9	9	9	9	1052100	588440	564540	770760
L-threo-3-Methylaspartate	6721200	7015400	6972900	7249000	5979400	5976000	5762500	5579900	622410	543210	592870	506020
3-(2-Hydroxyphenyl)propanoic acid	5888100	5592000	6032700	5865900	5703800	6517100	6311600	6342300	6789800	7227300	6486100	6432100
Palatinose	9	9	9	9	9	9	9	9	26598	46871	27090	39109
Glycine	732000	788970	990180	670710	806120	913330	732530	829380	524980	705250	694930	655800
L-Cystine	32340	37113	55273	19175	80497	50481	46029	61279	599230	744060	493630	624750
L-Tyrosine	394820	366300	500730	413400	394820	357640	426430	287080	173970	134910	167460	162320
L-Arginine	50838000	47895000	50963000	46158000	48733000	55217000	57519000	51991000	794580	853760	381240	682280
L-Lysine	27063000	22742000	29087000	24052000	74167000	67955000	85599000	73049000	13503000	10977000	11194000	9768800
L-Ornithine	1173700	793910	877120	1138200	942160	1018400	1089100	967250	587940	490370	512730	674570
L-Alanine	33718000	37751000	42999000	33776000	35752000	34891000	30426000	35009000	4624100	5616000	4717900	4712100
L-Citrulline	1739100	1608900	1997100	1639300	1654800	1627900	1670300	1823700	212160	216830	171860	182900
L-Glutamic Acid	27765000	18786000	23649000	23970000	18027000	27345000	29988000	15403000	4327100	5841300	4966100	5470600
L-Histidine	9925400	10765000	11869000	9526000	10000000	9039200	8669100	8991300	16986000	12467000	14588000	13989000
L-Methionine	163110	206310	307960	243190	176730	179450	268510	169180	93946	59031	72049	78535
L-Phenylalanine	97328000	100500000	102400000	94376000	89250000	93875000	95950000	93090000	36641000	47949000	47872000	47309000
L-Proline	50159000	47169000	55388000	44979000	35646000	41847000	54041000	40311000	5145200	4760100	3383800	4219700
L-Serine	1857900	1730300	2560300	1473300	1090400	1760600	739880	1254600	236350	267900	311010	282580
L-Tryptophan	6040100	4947300	5754100	5670500	53043000	34512000	56351000	66899000	2763200	3029100	4526700	4582500
L-Valine	2591900	2567600	2696300	2696000	2051000	2263200	2374000	2381000	406870	265030	452580	407760
(5-L-Glutamyl)-L-Amino Acid	110550	222050	131520	267160	100960	195610	184990	165070	1710600	2195500	2352700	2886500
5-Hydroxy-L-Tryptophan	75039	76674	83928	76849	114500	84861	102620	101770	9	9	9	9
5-Oxoproline	1563400	1294300	2001700	1363400	2570000	1521900	1791100	1642200	452310	410060	407930	480550
Asp-phe	9	9	9	9	9	9	9	9	172160	109240	137820	105220
Betaine	1340900	1124800	1361600	1305300	1064300	1212100	1484500	1124100	2545100	2874200	2322100	2438800
Glutathione Oxidized	1166400	1513700	892470	1329300	140950	187240	198060	170300	1027000	53892	212600	204520
Glutathione Reducedform	250050	209060	269030	202500	156940	63868	132560	117790	29446000	9239100	12694000	16593000
Glyc-Pro	29316	45123	32555	23095	54668	26784	26283	55179	93665	82068	141950	87248
Histamine	135640	144080	131270	92184	76853	121770	108130	66227	1617000	1805500	2616300	1351200
L-Cystathionine	264640	216190	291190	230450	418300	468280	290460	358780	4991.3	9	9	9
L-Cysteine	13679000	13735000	16314000	14339000	13596000	16959000	11638000	14185000	11928000	15227000	12226000	12035000
L-Glutamine	24429000	19015000	26848000	21862000	66876000	63469000	80899000	66775000	12413000	10073000	10781000	9421100
L-Homocitrulline	451770	341870	276210	506170	255820	438200	407280	288220	437540	382370	227420	278740
L-Homocystine	111510	139340	188680	155440	131950	162470	166200	144850	9	9	9	9
L-Saccharopine	5669000	6314100	6015900	5506600	4773800	6529900	6011200	4542200	2004500	2505900	2296200	3532400
N,N-Dimethylglycine	7603100	6444800	6773500	6786100	6029300	8232900	7468500	6102400	4672500	6383500	4384200	5152100
N6-Acetyl-L-Lysine	562050	554900	433390	480320	396570	589010	521500	493060	3898500	3233700	2721900	3771400
N-Acetylcysteine	428670	458280	418730	369190	333500	396830	333150	318950	343900	388490	367390	352450
N-Acetyl-L-Glutamic Acid	405020	356500	483860	317980	490320	446170	458670	464000	2143600	2056400	1712200	2462500
N-Acetyl-L-Tyrosine	129710	137530	117230	140590	119850	136900	129190	133770	454130	515360	682090	408170
Gly-Leu	14742000	15031000	13394000	14864000	16606000	13198000	17101000	18191000	567420	321960	202830	409700
Nα-Acetyl-L-Arginine	233510	242650	244200	222230	227740	198470	189010	234210	219700	231860	241730	208680
Phe-Phe	80448	74049	76006	77714	70181	41931	85075	85303	10418	5368.1	5623.7	3964.1
S-(5-Adenosy)-L-Homocysteine	255150	238280	199420	320840	264820	217890	265620	278710	18579	15802	10095	19469
Serotonin	282290	253190	197560	287190	183730	174500	224090	403090	9	9	9	9
S-Sulfo-L-Cysteine	1078900	652210	608580	815600	373300	788510	831040	513480	6552.3	24026	61718	49903
Trans-4-Hydroxy-L-Proline	293940	267990	303460	296470	226950	292970	217040	243170	13685000	13698000	11413000	12685000
Trimethylamine N-Oxide	139160	133190	143220	123810	152010	172510	78687	111370	144670	214180	145180	149840
Tyramine	26185000	21962000	28168000	24396000	28153000	19056000	25475000	25329000	9	9	9	9
Urea	151760	170870	187030	180140	115820	114330	169090	137280	177570	194640	108770	177520
P-Coumaric Acid	3523500	3340500	4384200	3171400	4198000	2470000	2868300	2961500	1710600	1358600	1430000	1701200
Phthalic Acid	132060	139400	141820	115750	147240	84969	160240	119210	19192	9	13400	11697
1,4-Dihydro-1-Methyl-4-Oxo-3-Pyridinecarboxamide	2941600	887650	4050900	1193700	8255200	3158400	5166400	4448300	5432000	7371900	5324300	9343100
6-Hydroxynicotinic Acid	40320	41944	14047	27886	35895	21697	24349	36721	9	9233.5	18753	10000
Theobromine	25727	27604	15422	19197	94644	50235	78654	62601	18316	12052	16444	5188.1
Choline	352050	313760	363990	307600	275130	362640	370060	339950	277300	381140	223500	292500
1,5-Diaminopentane	1076400	1374200	1224300	1276100	1165800	1241700	1166500	918300	3277100	4181300	4325500	4837400
Putrescine	9	9	9	9	9	9	9	9	17994000	20841000	18511000	19640000
Protocatechuic Acid	44603	34031	43216	55416	31190	32130	48065	41920	9	9	9	9
Biotin	1720400	2061000	1977300	1827700	2201800	1879800	1945900	2082700	101140	100680	85886	80671
1-Methyladenine	620550	650040	710860	779560	538860	640470	716920	704570	231570	231380	205340	273980
1-Methylxanthine	27662	16469	8867.6	13208	9	9	9	9	147390	207690	180960	165040
2'-Deoxyadenosine-5'-Monophosphate	148330	269160	56692	174850	19982	83636	31971	60731	6291200	4766300	4558000	6099400
2'-Deoxyinosine	736010	978570	477290	708120	154860	193170	136860	236200	2418500	1934800	1035800	1253700
2-Hydroxy-6-Aminopurine	3355900	3108600	2793300	2976100	3001700	2740700	3299600	3469300	1464200	837330	1192800	1198000
3'-Aenylic Acid	10618000	16444000	6594200	14893000	1753300	1659400	1290900	1616800	25655000	22296000	26615000	28526000
5-Methylcytosine	32989	42390	30482	22435	13815	22417	11045	17318	9	11577	6412.9	8333
5-Methyluridine	9	9	9	9	9	9	9	9	237200	164640	177530	103330
8-Hydroxyguanosine	1168200	1304700	774970	1086400	254820	307470	282610	214660	213720	93922	126980	121820
Adenine	1865300	2286600	1838900	1994200	668380	985340	918310	677920	14445000	10427000	10786000	9511100
Adenosine	91560000	100310000	74994000	86531000	23624000	29364000	28802000	32567000	76117000	49918000	65485000	56317000
Adenosine 5'-Diphosphate	165710	210720	153240	154830	31228	71958	66689	48365	3813000	3064200	2017700	3400000
Cytidine	233880	265010	138920	213440	75778	81272	70377	105540	3008300	921280	492520	1292100
Cytidine-5-Monophosphate	7560200	8574400	4695200	7241600	564710	1014000	736270	653310	4426000	4201100	1794200	3065200
Cytosine	9	9	9	9	9	9	9	9	583420	257890	292410	373920
Guanosine	78712000	82583000	51908000	68331000	16327000	18192000	18184000	22014000	17603000	7190300	15065000	10653000
Guanosine 3',5'-Cyclic Monophosphate	3986000	2995100	4603300	4501400	16048000	13355000	16344000	18156000	321540	663740	394040	268010
Guanosine-5'-monophosphate	1438900	2163900	1081900	1387300	198800	185260	165760	192580	1153000	809280	809750	867980
Hypoxanthine	9	9	9	9	1416700	1160700	1458600	1189900	2445000	3292800	3079600	3998700
Inosine	23167000	27714000	17996000	21877000	5554000	6806000	6315700	7751000	16068000	10862000	13565000	15006000
Nicotinic Acid Adenine Dinucleotide	796280	941670	591140	710530	215120	154430	186650	189060	34382000	22891000	26367000	28277000
Purine	1630000	1616000	1649600	1772500	1652100	1625000	1644800	1729500	867920	667390	537760	839190
Thymine	315140	528320	279960	404500	237700	174010	180420	238460	8697200	7864500	11347000	11483000
Uracil	455550	559980	417340	363940	294550	195450	242950	220960	3075400	2565400	2857800	2888200
Β-Nicotinamide Mononucleotide	35310	36254	24291	23944	17720	53890	46605	34249	7159000	12522000	4693700	5435600
Cis-Aconitic Acid	63697	73447	58777	77835	57125	74533	55192	85228	51477	62804	63175	41199
N-Acetyl-5-Hydroxytryptamine	9	9	9	9	9	9	9	9	643540	504490	557650	482370
D-Mannitol	14246	11022	16484	11178	7867.3	12548	24193	17099	1587800	1814800	827700	2419200
D-Fructose	781520	848180	982710	612560	590840	562050	550960	324850	3259000	4748600	3875900	2937900
Lactose	153480	134700	136440	208120	2820900	2089000	3532900	1993400	1490400	655060	1014000	944030
D-Glucono-1,5-Lactone	290410	310930	301290	215340	277620	221430	240240	273770	162930	184750	285620	242050
Pyridoxine	499550	424720	447880	405020	705310	373960	575700	553270	2098000	1756400	1597000	1569900
Nicotinamide	40181000	55667000	29084000	41684000	12838000	13659000	12315000	13786000	412720	849230	872440	831930
Nicotinic Acid	3746900	4323400	3855100	4198000	2634500	3333300	3140500	3593100	7168100	6988200	12261000	11472000
Riboflavin	11642000	11529000	6920800	12478000	5415200	5641500	6468100	5582900	10724000	12952000	10677000	12914000
Trigonelline	158970	159290	86258	152180	160810	212810	171280	113540	83494	86815	57585	126400
3-Indolebutyric Acid	6337700	6380500	6525400	6586000	6583100	6702000	7523400	7022200	6235000	6243600	7081200	6244300
Indole-3-Acetic Acid	1135900	1065500	1207300	915690	6150000	4751300	5932800	5067600	464670	462220	678900	377260
1,3-Diaminopropane	31735	32864	30985	33506	29860	36002	27884	27017	93844	90403	99674	75317
1,3-Dimethyluric Acid	83092	92899	86042	81230	92598	103840	147380	109510	9	9	9	9
4-Acetamidobutyric Acid	176910	212120	210040	249860	185040	201780	173590	167470	245560	851860	840770	510640
4-Guanidinobutyric Acid	273450	190990	226050	247900	153910	157530	179770	85798	1639200	1718300	1006900	1447600
5-Aminovaleric Acid	21340	15316	22737	12702	13509	16422	15353	12149	231850	231990	185840	228070
6-Aminocaproic Acid	2021600	2055200	2461800	2169800	2070100	1965600	2267300	2020900	436850	374000	496770	423280
Creatinine	72318	154370	111140	77151	95062	84667	68420	128230	87355	81493	121380	75704
Dl-2-Aminooctanoic Acid	9	9	9	9	13389	9	9	9	52081	40595	31932	51227
Dodecanedioic Aicd	10599	12831	14628	6211.1	14671	12418	16717	9256.6	16690	23947	28182	17220
Guanidineacetic Acid	24786	15065	20210	9755.8	17864	20060	19464	13432	253280	265100	219510	152030
Hippuric Acid	110530	133180	115930	138110	142930	103190	125940	132110	14124	16246	15193	15158
Kinurenine	91798	80242	71866	82577	79345	83035	102040	74172	9	9	9	9
L-Dihydroorotic Acid	8876100	11710000	11395000	8860400	11182000	7670100	10060000	12600000	8714900	8751900	7693500	9451700
L-Homoserine	824100	722770	886090	796420	468160	782890	481570	547800	93580	125290	110670	89044
Maleic Acid	3693000	3128500	2814800	3294900	2467600	3327300	2794700	2517200	314820	212000	239740	271260
N'-Formylkynurenine	13906	31541	37376	26034	113300	99694	148950	95235	128980	132000	108320	181960
LPC(0:0/14:0)	447000	344260	405650	587750	1407500	1220100	1349600	1247300	17691	2423.8	7489.5	6582.1
LPC(16:0/0:0)	6917600	6449000	5642700	7864400	16044000	13163000	19090000	15863000	1993500	1220800	1283100	1302900
Neopterin	18901	27402	6509.7	25890	9	9	9	3479.6	824280	774780	813110	762920
γ-Aminobutyric Acid	335120	317860	332480	338250	158750	190570	192060	126110	29980000	29601000	25079000	23991000
4-(Aminomethyl)-5-(Hydroxymethyl)-2-Methylpyridin-3-Ol	396280	336970	311160	387670	131830	224520	240280	141440	67537	68677	39341	43976
Acetaminophen Glucuronide	25469	8398.5	22239	4703.1	27753	12014	22153	24146	100370	84761	87708	93006
N-Acetylglycine	10191000	8199900	12113000	9900500	8371800	10758000	12473000	8839800	32396000	37635000	32157000	34183000
Cyclic Amp	17569000	17658000	21632000	16863000	42157000	32388000	45068000	42892000	249910	798470	259660	218290
N6-Succinyl Adenosine	3029600	2608300	2782000	2598000	3278900	1914400	3078400	3017500	322910	410220	502750	564540
2-(Dimethylamino)Guanosine	120960	129280	93329	139090	63232	69917	45443	53187	26778	22253	18028	27620
8-Hydroxy-2-Deoxyguanosine	85480000	127150000	91588000	69686000	30579000	8456300	34533000	19259000	36732000	5926600	20715000	15220000
Isoxanthopterin	224440	183350	85776	182420	35584	65199	38768	61930	247710	208560	190220	184800
N-Acetylthreonine	32258	48008	38856	25324	40301	40424	41361	54526	61078	52317	48722	55646
L-Homoarginine	49358	23709	25682	47706	14561	24904	50087	38584	3091100	2752900	2424800	3474200
Pantetheine	133240000	134900000	124600000	133850000	140260000	129000000	126780000	119590000	134440000	136540000	136490000	135280000
Hypoxanthine-9-β-D-Arabinofuranoside	23167000	27714000	17996000	21877000	5554000	6806000	6315700	7751000	16068000	10862000	13565000	15006000
Pyridoxine 5'-Phosphate	16775	16607	23863	29830	9816.3	6723.2	19902	15851	713100	469230	497440	387750
DL-Pipecolic Acid	1634200	1499400	1832900	1875100	1581400	1495500	1943900	1411900	489820	579740	293050	499020
2'-Deoxycytidine-5'-Monophosphate	82225	82772	45834	97192	26894	34827	35313	28860	563920	371900	162260	298880
5'-Deoxy-5'-(Methylthio) Adenosine	51654000	57660000	38558000	51370000	13198000	20413000	17335000	20354000	7230000	5480900	8143000	6648300
Deoxycytidine	42195	22669	8941.2	16115	9	9	9	9	191370	88215	161930	144130
Sarcosine	904910	1086300	1280600	843770	1305900	890900	889550	1436700	1062000	1109000	997920	870100
Cys-Gly	9	9	9	9	9	9	9	9	1440300	2361500	1630300	996630
Imidazoleacetic acid	121390	98834	91319	69340	130240	105970	158990	95724	1695300	1513700	1047800	1479900
2-Aminoadipic Acid	259220	265310	163870	144150	235640	325590	173910	122940	1851800	1714700	1580600	1423500
LPC(17:0/0:0)	4747000	5273600	5698400	4796200	5502800	5224200	5380600	5944900	5377000	5793300	5710700	5326100
Sn-Glycero-3-Phosphocholine	2652200	2016800	3244200	1458300	2879500	4056300	2811700	2472300	4315000	4261800	1933900	2462600
P-Aminobenzoate	130540	120640	112960	113870	142950	100610	149270	131330	9	9	9	9
Indole	572190	431970	619730	427320	3603200	2778400	3754900	2604900	196110	273260	489640	176800
5-Aminolevulinate	293940	267990	303460	296470	226950	292970	217040	243170	13685000	13698000	11413000	12685000
2-Methylguanosine	1668200	1744800	1263400	1229300	466820	432220	497250	562080	1639700	1005600	1266300	1545700
LPC(15:0/0:0)	675600	560680	561000	784720	1160300	1023100	1267800	1120900	73741	71710	73567	73923
LPC(0:0/18:2)	84236	17697	44322	57580	72293	111860	110250	84623	22811	9263	11712	17745
Carnitine C2:0	85792	114780	136830	80345	93668	88340	105880	106550	889840	1070700	897850	994390
Thiamine	181420	165730	178700	228250	159880	247180	265030	189450	104130	57670	50577	75255
DL-Stachydrine	45717	91011	130460	75979	59731	47696	56734	156850	1275800	683350	809300	1260200
L-Norleucine	1166300	1028600	996180	856790	7987800	5511800	7525800	6240100	429630	564850	1024100	562310
DL-Carnitine	104510	110040	139430	91781	121880	124650	122340	81547	3234800	2642300	1812300	2568700
6-Dimethylaminopurine	776910	951130	682370	952820	700310	576890	663400	705880	929700	960070	669260	1070300
Indole-3-acetamide	693770	577910	671620	698670	766920	583330	766090	780970	74891	60410	63900	98487
15-deoxy-δ-12,14-PGJ2	9	9	9	9	9	9	9	9	66406	26895	78979	74842
LPC(O-16:0/2:0)	3246200	2819000	2484300	3330700	8725100	7014400	11658000	8961800	1178000	897100	1259500	1213400
2-Pyrrolidinone	2230900	2233400	2602300	2704700	3085300	3230100	2910000	2672700	117810	364690	385750	206080
Oleamide	1215200	642570	664900	311540	404080	533790	1215900	1708800	1804100	1232200	371650	314250
N1-Acetylspermine	120190	129940	173910	113730	108790	137950	141570	133350	9	15721	17146	11255
Pterine	59041	43686	54522	60452	47640	50619	27359	55309	327840	346980	347710	308960
3-Dehydrosphinganine	643000	449870	575740	623510	384220	548420	2061800	546720	266780	233540	374460	222850
2'-Hydroxy-5'-methylacetophenone	848140	985270	769300	1263200	1216500	1387500	676660	1381500	267430	204170	189930	193450
Spermidine	197410	241800	188800	192000	108440	134590	98793	52898	4661700	5840800	4737800	5613900
N-Acetyl-L-Histidine	141450	226550	123720	156110	145050	148240	169320	114770	1134800	1658500	1561500	672750
Isonicotinic acid	7708000	5831000	3249200	3590900	2023400	3265000	3481000	1622000	8016200	11860000	15349000	17382000
Phe-Pro	2511200	3666500	3897600	3868500	3691600	3556000	3387200	3538400	663570	547450	784980	668640
LPE(16:1/0:0)	1988800	1857200	1495600	2382400	44894000	44292000	48861000	54081000	105730	18503	22228	30608
2,3-Dihydrobenzofuran	53903	37428	43956	27653	31227	22743	28129	33443	20735	23397	39791	31434
2-Phenylacetamide	384550	350480	406030	296040	315190	319650	404190	358090	67797	61040	59036	49335
Ethyl dodecanoate	772610	896780	896990	918570	891710	973480	1042200	893580	888000	978700	733320	928980
L- Tyrosine methyl ester	9	9	9	9	9	9	9	9	624970	462920	677180	662720
3-Chloroaniline	4009400	4115200	4084900	4246800	4034200	4263000	4215100	4262700	4202600	3846900	4334600	4019800
Butylamine	250660	195870	218690	223110	134250	201000	150610	129200	33434	60973	32664	35800
Hydroxyacetone	806460	868360	960780	730370	1042300	778100	772970	874430	923210	1244800	1088800	987910
Methylcysteine	9762500	12020000	11071000	9703000	8069600	7315300	8985500	6972000	25868000	20042000	16124000	19224000
Ethylparaben	61600	59607	51011	45452	47534	45697	51037	50336	44025	57996	61997	58947
Triethylamine	587800	433970	636880	669110	361660	517190	565410	631860	192400	9	9	9
Barbituric acid	404260	386220	541940	297400	544510	473340	395340	480630	438140	316740	283940	297250
Creosol	2403300	2939200	1799900	2614500	757100	976460	1323800	1280600	294400	254970	353430	339560
3-(Methylthio)-1-propanol	9	9	9	9	9	9	9	9	677070	606640	815280	797680
2-Pentyl-3-phenyl-2-propenal	40422	35106	60805	23401	39141	46853	68037	39766	27233	46499	34957	38113
PYRROLIDINE	1560900	1516000	1520600	1526900	1117800	1291400	1342300	1321300	278950	189850	288290	260760
1-Naphthylamine	388340	367300	496990	380070	491610	392540	404000	502220	289820	345590	376990	354590
6-Methylnicotinamide	348560	212140	268580	325270	334670	445040	389730	399960	1150500	1044800	1398500	1430500
(R)-2-Hydroxy-3-phenylpropionic acid	2013000	2104900	2542000	1840800	2019500	2392100	1961100	2021200	2969100	3120600	3038000	3186600
Nα-Acetyl-L-glutamine	2020900	1582300	1625300	1917800	1621800	1782100	1985900	1423700	4957100	4246200	3317200	4034900
Gly-Phe	10753000	13897000	14958000	19078000	10724000	13550000	14895000	20522000	86292	14407	44193	39211
N-Methylalanine	7603100	6444800	6773500	6786100	6029300	8232900	7468500	6102400	4672500	6383500	4384200	5152100
3'-UMP	54385	33540	18820	15252	29145	19687	46041	47832	189300	203170	185190	138910
N-Methyl-L-Glutamate	259220	265310	163870	144150	235640	325590	173910	122940	1851800	1714700	1580600	1423500
N-Methyl-D-Aspartic Acid	55877	43541	77048	39061	102910	136560	82591	61252	383860	342550	390160	445500
N-Alpha-Acetyl-L-Asparagine	13143000	15053000	16367000	13801000	17773000	15605000	14864000	17216000	280950	369570	284220	422330
Phosphocholine	239370	341890	252280	181260	192930	206120	108890	275670	2573300	3690600	3665300	3417900
Thiamine Monophosphate	70765	83141	60188	86405	15976	5607.7	18956	13851	107280	102190	116920	107590
2,4-Dihydroxypteridine	154200	131260	90317	160750	70695	72480	84702	91540	223500	165970	165380	240770
N-Amidino-L-Aspartate	9	9	9	9	9	9	9	9	9	35997	9	9
L-Tryptophanamide	45387	50440	51033	32593	262550	202070	279890	229650	11439	24432	37226	19426
Catechol	2720300	2883900	3282200	3005900	3049700	3325100	3099100	2965600	2827800	3304000	3398200	3576400
3-Methoxytyramine	199320	193110	208240	226500	201030	220600	207720	195560	100880	80435	76112	103580
Pyridoxal	132350	101840	67591	108850	92063	60001	64044	83289	2002900	1762700	2114600	1749600
3-Methyladenine	620550	650040	710860	779560	538860	640470	716920	704570	231570	231380	205340	273980
Delta-Hexalactone	60706	77711	87520	119240	55496	62128	55574	81072	54333	141750	196570	113640
1-Hydroxylamino-2-phenylethane	7225900	7531500	6720600	7580200	6956400	7080200	6866000	7345000	2937100	2906600	2994400	3420500
Coenzyme II (β-NADP)	9	9	9	9	9	9	9	9	377050	310370	368040	449160
D-(+)-sucrose	153480	134700	136440	208120	2820900	2089000	3532900	1993400	1490400	655060	1014000	944030
γ-L-Glutamate-Cysteine	9	9	9	9	9	9	9	9	703290	586300	604440	585480
5'-Deoxyadenosine	5505000	6622600	4061500	4810200	907800	1292600	1125600	1456100	20946000	11702000	9834600	9856500
Threoninyl-Phenylalanine	43808	77166	65282	90009	68776	88877	102050	138550	60742	66271	97055	86665
Benzaldehyde	6302700	6350300	5821300	7101500	6804200	6456700	6207700	6653500	3154000	2829100	2513400	3081600
alpha-hexylcinnamaldehyde	110530	83760	105660	99381	85640	79297	56660	140840	50589	53692	57164	59939
N-(2-hydroxyethyl)stearamide	56959	35793	43625	59616	83642	109400	120420	112770	18543	11433	34217	24003
Triphenyl phosphate	78895	84352	40849	68208	50247	38789	72309	56277	50774	73617	71821	56567
Sphingosine	643000	449870	575740	623510	384220	548420	2061800	546720	266780	233540	374460	222850
Hydroxyquinoline	120210	127180	125900	87685	793120	551730	712710	615680	67675	72784	119340	79232
DL-O-tyrosine	97328000	100500000	102400000	94376000	89250000	93875000	95950000	93090000	36641000	47949000	47872000	47309000
Indole-5-carboxylic acid	51412	51697	52830	44209	43725	55744	70036	65816	96006	111860	103630	119390
9-Fluorenol	242200	274040	293990	292430	248310	260030	311700	313630	268980	277400	239380	289220
Palmitoyl N-isopropylamide	2803400	1811700	2703800	3343600	197610	231180	5786400	315680	152370	164310	224170	148820
6-O-methylguanine	1698300	1832700	1457100	1703200	1000900	811390	1055900	1086700	546040	434220	431180	438900
Kojibiose	15732	13666	11484	14194	195290	89221	124710	177920	953450	707840	1221600	1003000
2'-O-methyladenosine	11463000	17870000	7235400	13579000	1581600	2021200	1396300	2041700	24698000	19823000	30469000	20485000
Oxypurinol	2286800	2541000	1274100	1676700	572240	485700	517010	684690	495520	242120	404690	334720
Allopurinol	429220	287590	229830	378470	369190	639060	564190	584410	2039800	1913600	1970300	2149200
MG(18:2/0:0/0:0)	93648	98548	86647	95854	99922	79296	69343	63844	84975	134850	108450	66664
2-Aminomethylpyrimidine	3489600	3473700	3653700	3388800	3165800	3093900	3242300	3454700	5086500	3835900	3572800	3883500
D-Turanose	15732	13666	11484	14194	195290	89221	124710	177920	953450	707840	1221600	1003000
(R)-(-)-2-phenylglycine	7225900	7531500	6720600	7580200	6956400	7080200	6866000	7345000	2937100	2906600	2994400	3420500
1-acetylindole	167010	152430	172890	164640	639590	560350	688530	620290	98399	111020	118950	86764
1-methylhistamine	90617	60575	73149	56103	57267	49920	83030	54935	87888	78183	41694	50103
Linoleylethanolamide	37148	22580	38942	45012	104330	65542	102140	111560	3685.8	3422.4	4757.5	4188.8
L-Isoleucine	120400000	124020000	109920000	124630000	58100000	100660000	87127000	126450000	14933000	12057000	13737000	22426000
LTE4	2003.3	3416.9	1837.4	2666.1	6488.7	3959	14296	15324	12237	8257	10150	9010
Creatine phosphate	5120.5	16033	28629	16654	17297	8394.1	12122	9660	110730	131690	137550	135150
1-Methylguanine	1698300	1832700	1457100	1703200	1000900	811390	1055900	1086700	546040	434220	431180	438900
Palmitoyl-EA	9	9	9	9	38096	27915	28408	44849	9	9	9	9
9-octadecenal	456660	441580	474220	414420	457220	551390	664990	564420	218720	186790	147610	151460
N-Methyl-α-aminoisobutyric acid	11508000	12280000	12957000	10429000	12055000	12465000	13541000	12966000	26372000	32499000	15781000	25456000
N-Acetylcadaverine	1611100	1614500	1177100	1563600	510480	887090	511180	964690	1821600	2602000	2431400	2488500
Flavin Single Nucleotide(FMN)	1427300	1181500	1012900	1717400	170140	89175	157350	117360	1782300	1602800	1788900	2117300
Biotinamide	9	9	9	9	9	9	9	9	173550	106360	115100	93382
Hypotaurocyamine	5191000	5023600	3419600	4196200	1091100	1190300	1190900	1721500	1161900	678810	706400	784980
5'-deoxy-5'-fluoroadenosine	2954800	3444200	2355000	3263600	818240	1058700	956830	840780	2988300	1756300	2312400	2022800
(1R, 6S) -6-amino-5-oxocyclohexyl-2-ene-1-carboxylic acid ester	51624000	57671000	62693000	51533000	52061000	47080000	48090000	44834000	93507000	68473000	75073000	77410000
1,3-Dicyclohexylurea	227610	251900	253250	220840	283830	242270	228110	239130	225630	270380	261270	253290
PC(O-16:0/O-1:0)	18333000	16032000	14236000	19681000	37182000	31433000	43213000	37077000	5202500	3387400	3760900	3798600
4-tert-butylbenzoic acid	688600	556110	566600	527590	371650	413160	396320	319180	511340	654250	487650	503600
2,4-diacetamino-2,4,6-triphenoxy-D-mannopyranose	9	9	9	9	9	9	9	9	544820	305360	344090	510860
1-deoxyvaleric acid	1229700	1120600	1179800	1158200	1002900	1216600	1188100	1078000	1046200	1088800	1149500	1098000
2-Mercaptobenzothiazole	74681	71208	77078	64335	67357	65718	66877	64318	33289	38014	27635	35043
Menadione-9	9	9	9	9	9	9	9	9	102190	52466	69257	61808
10-deoxyformamycin	1728800	1783200	1423300	1826600	2516900	2700800	2992500	3103000	192740	102800	143770	181270
(4Z, 7Z, 10Z, 13Z, 16Z, 19Z) -Eicosahexaenoate	16422	11469	9485.7	15201	26449	18232	26421	23267	666920	389860	526810	435960
Guanine	3355900	3108600	2793300	2976100	3001700	2740700	3299600	3469300	1464200	837330	1192800	1198000
Chrysophanol	188480	167410	174870	173360	169240	177000	169450	181370	9	9	9	9
3'-Dephosphocoenzyme A	9	9	9	9	9	9	9	9	8395100	2625800	4014600	5648400
Leu-Gly	578220	1513600	1527300	4713900	23078000	6797500	24720000	13273000	377640	143380	211640	291950
Cytarabine	216180	200420	152930	203550	112580	58063	77680	97687	2111000	749380	998350	676750
Piperidone	82593	107310	162000	100160	83312	52334	100690	119170	406300	258800	173000	66344
(2S, 3S) -3-methylphenylalanine	29916	47394	42515	55708	50153	33813	58133	29716	175970	165390	198010	154960
MG(0:0/16:0/0:0)	1172600	1170500	1246800	1079700	1240100	1698200	1714900	2003900	1764300	1178700	1258500	1771900
LPC(0:0/20:4)	295100	124470	170910	264490	372150	274280	552570	718580	43174	8189.9	16446	25289
LPC(20:4/0:0)	295100	124470	170910	264490	372150	274280	552570	718580	43174	8189.9	16446	25289
LPC(18:0/0:0)	1257700	1143500	986450	1399900	3645500	1961700	4103000	3669900	224430	173610	149950	203510
LPC(18:1/0:0)	10158000	6137200	6834500	11699000	23842000	18886000	27770000	26623000	407160	276380	383150	327080
LPC(18:2/0:0)	588980	196670	270500	558710	622640	852010	944180	987420	813750	470360	566570	439350
LPC(0:0/16:0)	18176000	15845000	14118000	18789000	37588000	31511000	45939000	37136000	5471600	3318300	3847500	3664400
Shinorine	1577800	1696200	1412100	1744000	9	1651200	1226300	924160	707050	1019700	1179800	658380
mycosporine-glutaminol	9	9	9	9	9	9	9	9	1380900	1200700	1898000	1257700
Mycosporine glycine	139640	42142	70339	101230	38409	169230	117070	33427	930750	1250400	777080	1151700
Ala-Tyr	308770	324920	199550	262540	57619	89334	70382	81303	1011300	508710	479360	514150
Carnitine C23:5	348400	294690	278030	310370	115170	120280	147310	157610	118340	82538	76306	125650
Carnitine C22:2	1701600	1164900	1157000	1244300	5145100	5273200	5853800	6210400	93659	64959	57395	67973
Carnitine C19:2	782340	899480	901170	798250	1194300	1105300	1007200	984620	1175800	1366000	1278500	1177300
Carnitine C18:3-OH	171980	159150	139320	226290	180630	169660	209250	251450	28177	15421	19215	22308
Carnitine C15:DC	31242	27104	33893	44956	11467	13279	27886	14328	14602	11387	9090.8	18023
Carnitine C9:0	139330	122330	133790	169260	144360	110980	155920	177040	9	9	9	9
Octadecadienamide	382330	219020	188970	61785	97738	126590	350690	397010	377600	269680	143530	79932
FFA(22:7)	27415	31026	33907	29579	32551	15855	26784	30449	24721	40643	30169	21570
(2S,3S)-butane-2,3-diol	665140	701760	757890	709310	501220	516050	618780	592110	120340	135840	167370	165810
Ureidosuccinic acid	125940	53258	90774	130650	432300	455170	439840	248010	244870	255550	176120	219500
5-Methyl-2'-deoxycytidine	9	9	9	9	9	9	9	9	18360	21391	20922	15565
Pantothenol	9	9	9	9	9	9	9	9	53605	231640	53294	66430
Diethyl 2-methyl-3-oxosuccinate	44770	42497	39813	33762	52205	45855	46114	45164	38912	42684	33691	42213
N'-Methyl-2-pyridone-5-carboxamide	9	9	9	9	9	9	18857	6799.2	40992	27947	56850	46087
Quinoline-4-carboxylic acid	38149	52933	62775	64580	41843	35396	46308	56256	29401	41416	18368	16251
2-(2-Benzothiazolylthio)ethanol	142080	109720	138070	149340	334080	255740	413520	392850	29697	24583	23572	23726
SDMA	891430	864170	1086800	897600	1269400	1231400	1051100	1245700	3119300	2694800	2211800	2260500
Cis-4-Hydroxy-D-Proline	9	9	9	9	9	9	9	9	4515000	4671700	4252700	4765400
N6-methyladenosine	921460	910720	859030	905040	464990	409480	532320	435990	455020	360290	371110	235480
N-Acetyl-D-Galactosamine	14178	30143	9660	16820	9	9	9	9	169910	213550	143430	178840
Leu-Val	52029000	58760000	50502000	69053000	98886000	92037000	139070000	116850000	172900	72252	94663	156990
Phe-Asn	35808	19665	20009	39346	106430	59817	130560	62402	12613	4468.5	9940.8	15738
Phe-Met	9	9	9	9	9	9	9	9	3355600	1084400	2077300	1607400
Glu-Met	408710	553110	479520	492260	447530	281630	456130	512220	13707000	4282800	7429800	5369100
Met-Glu	408710	553110	479520	492260	447530	281630	456130	512220	13707000	4282800	7429800	5369100
Phe-Val	709690	834060	912160	921750	1628300	1528900	2741100	2626200	314570	322280	218500	218120
Carnitine C16:2-OH Isomer 1	68743	58254	52239	69118	148830	126580	175720	189100	15373	5891.8	9464	13593
Carnitine C18:1-OH	13113	10872	10618	11514	15796	14260	12793	18082	9	9	9	9
Ala-Glu	186940	155880	173820	220920	213350	167140	215580	269430	10491	14163	9457.2	13873
Indole-3-acetonitrile	868200	850300	875210	952560	2985900	2016600	3631200	3532500	248850	274270	354820	380650
Isopentenyl pyrophosphate	135240000	120460000	136350000	138860000	155780000	148730000	147800000	147100000	338350	286970	390410	393970
Pro-Ala	9	9	9	9	9	9	9	9	2785100	2768400	3461100	2939800
L-(+)-Gulose	204660	254360	225180	136470	273430	99493	177310	135430	2555700	3051400	3043800	4895100
Aniline	116580	103990	108140	134130	126320	106730	109080	123910	96906	75626	44961	104140
2-Amino-1-phenylethanol	21171000	15863000	22511000	18416000	23706000	15983000	22109000	20125000	64052	28888	15541	15058
1-Methyladenosine	921460	910720	859030	905040	464990	409480	532320	435990	455020	360290	371110	235480
Carnitine C16-OH	45880	34781	41484	41422	19818	24014	37294	16793	16813	16222	17581	15624
PC(O-16:0/0:0)	1154100	1660500	917860	1471700	8773700	4377700	1946100	2118100	28559	20988	33494	35644
LPC(O-18:1/0:0)	663880	346370	562650	783710	1356700	902260	1325500	1617200	9	9	9	9
NE,NE,NE-TRIMETHYLLYSINE	712040	695280	711530	726830	750600	685980	816880	692920	6135500	5180100	5423500	4854000
N,N-Dimethylarginine	954190	629710	933430	834570	1200300	1492000	1291800	933690	3136300	3222400	4381000	3352200
Glu-Leu-Arg	9	9	9	9	9	9	9	9	877640	971930	911130	946200
Leu-Val-Ser	1608600	1829200	1631900	1483400	1878600	1353100	2091800	2177800	1279000	980940	1343700	1369300
Phe -Glu	2012500	2266300	1878300	1866900	2404000	1516900	2218000	2618300	81263	78959	91196	122110
Leu-Ala-Val	223390	246340	187120	292540	418100	227510	557220	402140	9	9	9	9
Gly-Gly-Phe	426030	346240	377620	218230	203230	247050	222440	304710	104800	110170	74967	159280
Glu Glu Ile	1438900	1476600	1654000	1751700	1344900	1305600	1358300	1430100	182750	159380	185780	205050
Leu-Leu-Glu	56207	74259	47543	82508	147790	47902	223590	125680	36612	45994	30159	29262
Ile-Ile-Thr	9	9	9	9	9	9	9	783180	707350	377780	586540	515910
Val-Val-Val	9	9	9	9	9	9	9	9	310750	239930	268270	180830
Thr-Leu-Ile	41500	55407	39701	45669	65605	41577	73207	31079	111530	133210	134020	104400
Phytosphingosine	9	9	9	9	9	9	9	9	137170	143170	178080	174930
LPE(15:0/0:0)	9812300	9556100	8412700	11249000	7180100	7292500	9586800	10335000	656940	426460	585560	658180
LPC(0:0/17:0)	7690400	8194400	7554800	7769300	8327300	8347200	7793900	8778700	8278100	7497100	8032400	8010200
LPC(0:0/15:0)	348170	263590	260870	345280	804680	767180	628030	592390	4287.1	11636	15655	10195
LPC(0:0/16:1)	248980	223690	203470	326710	1082200	710590	990340	1124700	7972.9	6071.4	5724.9	4010.1
LPC(0:0/18:0)	2669500	2380300	2059000	2359700	7237700	5262200	8721700	8193700	845180	752470	960740	903570
LPC(0:0/18:1)	3118700	2080300	2613100	3561300	8718100	7037700	9334500	9168700	92442	44385	59064	32404
Methyldopa	41564	35745	50267	65352	22536	44234	37768	14794	100270	84100	53817	146100
(E)-Guggulsterone	625270	535440	466060	682180	724690	776790	955110	916910	34372	38776	20770	43971
(Z)-Guggulsterone	379000	320420	287510	323300	473830	495120	626080	683970	48932	42292	30388	72396
1-Methylguanosine	1219100	1391200	965800	1130700	397310	301610	378500	458560	1279200	806860	1011900	1263000
1-Methylinosine	78136	79677	78480	86112	36684	26897	42919	40951	59594	41787	34010	47702
2'-Deoxyadenosine	2014400	1677000	1696100	1576600	1438500	1686800	1471500	1716500	1211900	1500200	1244200	1173200
2'-O-methylguanosine	1219100	1391200	965800	1130700	397310	301610	378500	458560	1279200	806860	1011900	1263000
2-Phenylglycine	67008	41461	82755	59967	57642	31414	38592	37751	108940	67539	115710	132160
3-Amino-2-piperidinone	1589100	1569800	1843200	1841600	1979600	1790700	1865500	1530700	195940	192730	285590	236370
3-Amino-4-methylpentanoic acid	261440	230580	307960	230160	254270	181030	354210	289170	125280	99240	102890	111490
2,6-Diamino-5-hydroxyhexanoic acid	9	10649	9	9	12211	6439.2	7373.2	15784	1908900	1890000	2265800	2829400
Acrylamide	945000	976260	1335200	805050	941890	756200	712740	1169000	146580	155440	155380	137390
Agmatine	574700	500990	551180	610170	431280	637340	501980	332810	1187100	1509400	1779300	1428500
Ala-Phe	751800	1154000	1060900	1373500	3363900	2310900	3414300	2756400	73337	21556	38660	35740
Astaxanthin	152820	169160	168630	146270	176880	164610	184430	155590	214600	214940	223040	204180
Cyromazine	170490	121180	110470	117310	54774	53595	80986	85876	15233	17450	15508	13335
Cytidine-5'-diphosphate	3668200	4545300	4740300	3573600	3194000	4461100	4534800	3027100	1409500	1487900	1817400	1494200
L-Allothreonine	824100	722770	886090	796420	468160	782890	481570	547800	93580	125290	110670	89044
D-Glucosaminic acid	124040	58467	100190	42988	26608	67246	94607	102260	36222	20526	25479	26887
Harmaline	19031	23508	16869	21489	8257.4	9665	6644.3	9116.1	208450	204520	206510	169020
Val-Tyr	207920	310160	118740	367550	1539100	771860	2188300	1449800	28602	19543	21767	11487
Jasmone	69670	37527	70876	38224	42726	24955	30444	36348	35933	23669	32198	41624
Ala-gln	40129	56154	108570	45237	107820	115730	100180	123910	21571	17253	23852	27684
L-Methionine sulfoxide	1219700	1009800	896050	967890	446070	979020	1173600	514450	59332	131050	53383	106120
L-Norvaline	54210000	55213000	57986000	47669000	46699000	46279000	48231000	52430000	7523900	8349000	9679200	8547100
N1,N8-diacetylspermidine	167180	220460	170600	254180	62182	114370	98006	107970	298600	352740	333910	235730
N4-Acetylcytidine triphosphate	3400800	3468300	2900200	3407500	3556000	3540700	3167100	3039000	3209500	4057500	2954800	3399000
N6-methyl-2'-deoxyadenosine	21197	15065	7848.5	14225	14737	8947.8	9	9	86841	71870	33583	28466
Nicotinamide riboside (chloride)	36422	47714	51935	27163	7639.5	17730	6397.4	21674	3868500	3193500	1458900	3014300
Palmitoylethanolamide（(PEA）	134210	139480	156410	207680	312470	216300	370460	317040	121300	94410	138090	143000
Stachydrine	73095	48398	143380	54614	22321	43732	37051	27008	169290	208360	211080	127220
Cyperotundone	65194	87320	80474	90917	93979	111710	69574	81868	100600	94320	135270	103020
Nootkatone	19391	24725	31176	24756	18838	40998	22951	31111	22448	30720	41469	36368
Zerumbone	99388	75473	73758	79591	103520	112260	81825	95411	128440	140640	135170	113940
alpha-D-Glucopyranoside, beta-D-fructofuranosyl	2569.4	2252.5	5898.5	9	20475	16065	14971	17784	247960	180640	57042	160520
Arg-Leu	230050	216820	162080	257970	410460	264750	342800	227560	1222500	921770	919750	1266400
Asp-Tyr	9	9360	6293.9	9	27742	37925	9	9	123680	83491	95258	179610
DL-Aminopimelic acid	228720	189470	225190	217540	165830	80080	209240	178060	190400	230180	280370	379110
Eicosanoyl-EA	19032000	27048000	22893000	30066000	9212000	11258000	36328000	10212000	9436200	10482000	13356000	9581200
Gln-Phe	28649000	28702000	26979000	30465000	27049000	22852000	30252000	28215000	465650	558620	732520	665320
Glu-Leu	691850	782330	819240	846620	635470	524640	796650	787360	49105000	22408000	28877000	25181000
Glu-Tyr	156340	174020	140890	87411	151630	106260	131370	104160	9772500	5111600	8380800	8356100
Gly-His	155030	97757	113120	135130	103290	138180	80389	107540	468990	478230	610560	513770
Gly-Tyr	8597000	9045000	8930700	8774300	9782200	7956100	11581000	10604000	37309	52586	30115	37517
His-Leu	3974400	6158700	3958300	6164000	4834700	5060500	7253800	5465000	111190	200980	186420	131120
Ile-Lys	8942400	9200700	6681400	9134300	14586000	13215000	23770000	20384000	2260700	1994000	2189000	2686100
Ile-Met	9	9	9	9	9	9	9	9	671710	327280	418650	356860
Leu-Pro-Tyr	18620000	17254000	16298000	20376000	15096000	14459000	14726000	17201000	69396	54946	54605	58175
LPE(17:1/0:0)	13379000	13546000	12331000	15085000	9197600	8488800	10195000	9596700	466900	221810	228650	306010
Methyl nicotinic acid	9	9	9	9	9	9	9	9	539050	400300	821820	512170
Phe-Leu	1151700	1221000	1145200	1253900	1324000	898090	1239100	1355300	18558	14904	20527	19939
Pro-His	26635000	26654000	28020000	30869000	27111000	22677000	29804000	27425000	1358900	1053400	1155400	1421200
Pro-Ile	1663200	1673800	1823200	2047700	1916600	1486000	1819700	1576400	243880	242920	302760	298690
Pro-Val	4642800	4838600	5400100	4653200	5924700	4786400	5725300	4190100	227350	256050	279090	340560
Ser-Leu	466140	507590	562660	623560	544750	428090	453990	504650	8885300	7799100	8847100	10061000
Ser-Phe	646090	488380	465590	572950	405430	337600	550840	690440	94729	137630	124330	176800
Tyr-Leu	390840	666040	530060	660640	3228100	1398200	3885400	2718100	131880	81583	46835	89746
Tyr-Phe	1491300	1369600	1444700	1727000	1523800	1166300	1579000	1742700	26105	26004	28463	22723
2-Hydroxy-2-methylbutanenitrile	115160	78026	119750	107150	57380	73820	106240	86190	85059	85563	73421	87135
3-Hydroxyphenylurea	4094500	4056300	4187000	3840000	5098100	5213100	4897200	4143900	5294200	5404600	5939500	5280200
Caffeine	29550	21524	41325	43229	45183	14980	44530	26124	33358	36402	28445	25592
LPE(0:0/20:4)	9	9	9	9	9	9	9	9	303870	379340	374250	500300
LPE(18:2/0:0)	1492100	1085200	784340	1344700	15087000	11018000	10998000	22241000	458840	346340	548650	545290
N(Alpha)-Acetyl-Epsilon-(2-Propenal)Lysine	11676000	14125000	14167000	11307000	15186000	11496000	14193000	14560000	972660	892650	1149400	1295200
N-(1-Deoxy-1-fructosyl)phenylalanine	49922	45878	66607	35509	51552	43426	55214	62126	60222	71070	37969	44808
N-Acetyl-L-phenylalanine	768350	790620	801880	862720	794130	597220	813860	855290	408940	551740	639570	508730
Farnesylacetone	242620	139170	139480	39599	67454	89467	251560	246890	227050	158040	91866	70000
Cyclo(Pro-Leu)	7047700	7275600	7048200	7952300	6950100	6280900	7980100	8014500	419750	332220	491170	414520
Cyclo(Phe-Glu)	566000	574600	552520	484650	565810	511670	621200	613130	59352	103720	110160	95479
Cyclo(Pro-Glu)	748040	866380	892630	941410	1050000	679780	969990	886860	261160	188250	291010	215570
Cyclo(Pro-Phe)	10079000	10600000	10483000	11926000	10679000	9118200	11057000	11884000	490040	500610	536560	588790
Cyclo(Pro-Pro)	980400	962640	998340	838890	949320	858510	1023900	795620	699120	682140	701650	749240
Cyclo(Pro-Val)	10098000	13282000	13076000	12623000	13840000	13086000	13349000	14594000	768890	682140	723340	800570
Cyclo(Ser-Pro)	11075000	11818000	11702000	13896000	15199000	11672000	12191000	10394000	1030200	1168600	1158600	1168500
Cyclo(Tyr-Ala)	2755600	2353400	2708100	2720300	2633300	2626400	2596300	2755300	152800	163920	161300	142490
Cyclo(Tyr-Leu)	1210900	1076500	965210	1375300	1376000	991420	1300300	1354000	28291	26201	27284	25240
Cyclo(Val-Ala)	1027600	879580	984740	1065600	1101500	1061100	1028400	1043000	181760	169650	163710	163320
Cyclopentylglycine	9	9	9	9	9	9	9	9	133940	95001	87229	120560
Ile-Asp	10563	21226	26784	5355.4	9	9	9	9	536680	588400	465580	637450
L-Aspartic acid-O-diglucoside	15982	29049	23615	13344	102510	85999	77308	128040	7979	13387	35685	9379.7
Leu-Leu	218520	260090	314310	189750	147890	84428	269610	124910	146130	104580	100370	104620
N-MethyTrans-4-Hydroxy-Proline	33827	25432	40753	19789	13338	21453	24591	24166	60998	59388	37302	51675
O-Acetyl-L-serine	55877	43541	77048	39061	102910	136560	82591	61252	383860	342550	390160	445500
Pro-Leu	9912300	10331000	9770100	12102000	11012000	12406000	18938000	17108000	656020	644380	950280	825070
Ser-Ile	523400	632370	524150	610330	522820	388330	478380	520140	8962700	7906600	8863500	10016000
2'-Deoxyinosine-5'-monophosphate	24168	57731	34729	25489	7385.9	3099.3	9959.9	19421	24547000	20313000	19655000	18437000
Eritadenine	18901	27402	6509.7	25890	9	9	9	3479.6	824280	774780	813110	762920
N6-(2-Hydroxyethyl)adenosine	120960	129280	93329	139090	63232	69917	45443	53187	26778	22253	18028	27620
3'-Deoxyadenosine	5505000	6622600	4061500	4810200	907800	1292600	1125600	1456100	20946000	11702000	9834600	9856500
2-Aminopurine	13369000	16778000	12055000	15564000	3234800	4988700	4727800	4477200	16590000	6931100	11285000	10048000
2-Hydroxyadenosine	85480000	127150000	91588000	69686000	30579000	8456300	34533000	19259000	36732000	5926600	20715000	15220000
N6-(4-hydroxybenzyl)adnine riboside	81160	103900	108480	102220	65468	96526	81649	71133	92368	73256	90908	80063
Ribosyladenosine	11513	31899	27300	34834	9	9	9	9	60877	106050	88661	65736
S-(Methyl)glutathione	35948	41682	39105	20938	27127	20954	31987	41950	336590	109760	168440	135590
S-Allyl-L-cysteine	7049.9	2810.7	3760.2	9	9	9	9	9	351470	310040	297430	230060
L-Lysine-Butanoic Acid	15011000	13973000	15747000	12738000	13899000	15663000	16552000	13718000	34662000	45196000	22791000	35092000
L-Methionine methyl ester	9	9	9	9	9	9	9	9	209460	169630	201780	263840
D-Proline betaine	15283	31059	10359	16791	9	25020	9	12213	41686	67729	48348	65275
2-Methyl-1-Pyrroline	545810	533610	467170	561170	1735700	1011500	1358400	1525200	359180	388610	341020	335960
Glu-Pro	1580300	1500100	1582200	1618100	1818300	1542200	1534200	1264900	364520	247100	414950	510900
His-Val	2622000	2418700	2391300	2743700	2663100	2176900	2901800	2419900	313160	311960	323640	371510
Hydroxyurea	2444400	2069600	1105000	1718100	783150	1724400	1874200	2276700	290020	320320	636430	255280
Melibiose	179820	114950	142780	140490	89608	147580	104680	85168	77184	73656	46154	87748
N6-Isopentenyladenosine	706020	583190	683990	738440	346960	364400	383790	423480	44325	36059	43275	45810
N-Formylglycine	8268400	7804900	9231900	8057500	7897100	8794600	8542700	8686300	3951800	4878900	3104400	4448700
2,3-Diaminopropionic acid	9	9	9	9	9	9	9	9	185150	223080	107690	156560
D-Pyroglutamic acid	3461900	3360200	3770000	2943500	4963100	3509300	4151200	2612300	709640	1110600	551670	889270
Aminolevulinic acid	126850	70681	79032	84411	110890	99264	84793	54068	4277900	4434700	3655900	4852900
D-Ornithine	2816900	2792200	3051600	2992100	2983700	3476800	3799700	3135800	1801400	1291500	1435700	1662500
3-Methyloxindole	9	9	9	9	9	9	9	9	15066	32020	23431	31807
2-Hydroxy-4-(methylthio)butyric acid	35094	53597	28152	50567	38478	72285	35126	56597	36321	28764	39540	32209
Ancitabine	6237.9	9	9	9	3848	4386.2	8248.2	2564.7	18165	19600	5916.6	16329
N-Acetyl-Asp-Glu	9	9	9	9	9	9	9	9	329230	297950	259810	390960
Phenethylamine	43793000	42389000	42985000	45391000	40733000	39365000	46263000	34234000	42929	9	9	9
3,6,9,12,15,18,21-Heptaoxatricosane-21,23-diol	1347500	1307500	1389400	1165800	1403300	1272000	1597100	2029000	867950	1090800	906280	916500
1,2,3,4-Tetrahydro-b-carboline-1,3-dicarboxylic acid	2445600	2319300	2374000	2660900	2596500	2092600	2626600	2809500	172920	145660	159700	171390
Ajmalicine	9	9	9	9	9	9	9	9	139800	162110	87714	79167
Berberine	16318	17423	20114	28376	17983	21134	17593	21078	17248	18131	22793	33281
Cytochalasin A	12902000	10515000	9992000	14666000	13338000	11773000	14802000	16650000	596120	402020	538420	612290
Cytochalasin B	16721	18920	16311	20666	38580	55333	64728	78634	60407	39906	47394	41693
Dihydromorphine	5573900	5962200	5057000	5104900	6525200	4558300	6427100	5918600	208810	132860	204490	183870
Ibogaine	479240	454760	453440	501560	492560	485480	449650	468260	502130	485410	547930	483150
Palmatine	16343	16583	21837	19638	18397	19844	22748	21734	19142	18009	19621	19229
Pilocarpine	28698	33483	36143	36863	31109	39706	32544	31956	28170	37392	26716	20776
Piperolactam A	455380	436450	494190	487670	446450	471260	481460	519930	485240	554130	444070	471470
Ranitidine	534370	561630	548500	473040	549030	551170	557200	530220	553830	574310	599480	640320
Sinomenine	160290	155520	159230	185310	185610	140470	189770	204980	25890	18695	20634	26998
Sparteine	130220	124650	123320	171090	163900	122610	134180	136320	132950	160150	155910	124300
strychnine N-oxide	3352200	4271600	3216800	3645600	3741500	2586100	3621100	4405900	87933	28151	83111	78421
Yohimbine	2706100	2109700	2823200	2398200	1257500	1233600	1463100	1534200	608080	545920	653460	580630
(E)-7-[2-Morpholin-4-yl-3-oxo-5-[(4-phenylphenyl)methoxy]cyclopentyl]hept-4-enoic acid	9	9	9	9	9	9	9	9	1047300	902110	883040	763720
[6]-Gingerol	483520	422470	531800	375230	277940	302490	352560	249850	334700	244120	299810	360810
1-(2,4-Dichlorophenyl)-2-(1-imidazolyl)ethanol	3291200	3263500	3264400	3670300	3627200	2950700	3738000	4248600	146560	149090	142460	158330
14-Methoxy-4,4-bisnor-4,8,11,13-podocarpatetraen-3-one	4030200	4065400	4664200	4441800	4897500	5165600	4073800	5228800	4687600	4834900	4472100	4304100
1-Nitropyrene	232730	197920	272340	266340	297790	292840	290500	331950	7722.5	4097.6	4952	3355.4
1-Trifluoromethoxyphenyl-3-(1-propionylpiperidin-4-yl)urea	9466.2	5015.6	8213.7	8647.1	20349	8653.2	65712	15806	13465	25170	21621	43342
2,3-Dihydro-2,3-dihydroxy-4-(4-hydroxyphenyl)-1H-phenalen-1-one	236340	268410	247180	279400	291550	318680	303980	347560	240570	246750	273240	384360
2,4-Dihydroxybenzophenone	9380	11569	13868	9976.2	14025	15570	8318.3	13903	12749	16566	11339	13466
2,4-Dinitrophenol	11877	14106	18331	11559	14710	13742	15053	15593	16209	16275	12177	15308
2,6-Di-tert-butyl-1,4-benzenediol	20327	25391	24309	23277	27488	21487	23760	27423	26834	28020	27882	32117
2,6-Di-tert-butyl-4-hydroxymethylphenol	14718000	15477000	14608000	13758000	11349000	12997000	10669000	10507000	15243000	16131000	16733000	17401000
2-Cyano-3-[3-ethoxy-4-hydroxy-5-[(phenylthio)methyl]phenyl]-2-propenamide	16035	21549	14146	15331	1824.7	2067.9	2961.1	2540.9	306400	365540	278450	324500
2-hydroxy-2-[4-hydroxy-3-(3-methylbut-2-en-1-yl)phenyl]acetic acid	21700	20520	20675	24928	14603	10182	45381	15675	17858	17799	13067	23794
3,3'-Dimethoxybenzidine	1547500	1359900	1491400	1708200	1752400	1577500	1815900	1719100	16398	9009.5	15869	5956.5
3-Methoxy-4-hydroxyphenylglycolaldehyde	426680	299010	382680	356280	3640700	2242900	3417800	3806400	135980	139770	189110	195800
3-O-Methylgallic acid	905280	891110	922220	860800	954610	913900	877590	801400	849190	949000	911130	959850
4,4'-Methylenebis(2-methylaniline)	9	9	9	9	9	9	9	9	1343900	1322200	1144300	845150
4-Fluoro-3-nitrobenzotrifluoride	222930	210200	234760	235120	232450	250200	252220	254360	286290	316770	298960	284200
9,10-Phenanthrenequinone	5438700	5682900	5670400	5432100	5514000	6230100	5697800	5877800	5496100	5298200	5577800	5514200
Alprenolol	3438100	3229900	2864900	3484600	1728200	1772900	1619900	2235100	123070	103220	106160	99413
Antimycin A1	9	9	9	9	9	9	9	9	165900	122760	121010	138190
Benzamidine	7474200	7670500	8388400	7975800	7411900	8608900	8788900	8132400	8619000	8518200	9442300	8977500
Benzeneacetamide, N-[5-(1-methylethyl)-2-thiazolyl]-	316790	314120	285960	354810	345040	323350	408770	407940	3101200	3706000	3838300	5793400
Benzyl ethyl ether	467230	575360	484160	473850	515350	652420	427800	574720	1845300	1959700	2124600	1851900
Betaxolol	7716.8	28805	29118	17970	5936.2	7667.3	10336	23173	31817	21600	13334	5823.6
Bisphenol A diglycidyl ether	23440	565880	4854800	45000	226600	232190	16973000	39638	9	9	9	9
Chloroxuron	1332600	1229700	1452900	1369800	1443700	1492600	1484000	1536800	1503400	1421100	1371500	1619500
Citalopram	187350	177480	172240	203850	227330	171700	215120	256920	12174	9549.8	10226	13098
Crotamiton	185200	164320	198330	154790	175630	249260	207840	189580	479110	439190	394400	461570
Cymiazole	366770	278380	359910	413760	453280	449560	412180	467410	15930	10115	13466	10534
Dapsone	118520	132380	106920	114050	35725	42320	34773	36830	782680	929980	721850	797980
Dioctyl phthalate	1843900	2192300	1361100	2707100	1200600	1767500	2179300	2490600	23937	20500	36611	34242
Diphenidol	180610	124200	139810	173130	148630	117000	181690	202180	9669.8	4860.3	6551.4	4265.3
Diphenylmethylphosphine oxide	306610	237280	335940	372600	412040	368110	353570	647960	9	9	9	9
Fluometuron	426200	408960	446180	432540	460470	491230	482630	491630	485480	491790	418060	470730
Gentian Violet	1767900	1222100	1801800	2297500	139730	186080	3811400	154230	112430	154020	157710	142470
Halopemide	9	9	9	9	9	9	9	9	9	5478.3	7216.3	17838
Irbesartan	159080	152470	157950	189410	175670	126400	196280	199940	5433.9	4293.1	5302.2	6600.8
Leonurine	464790	472150	448080	496990	432680	398180	512640	508610	96147	106160	103770	94782
Lidocaine	7956300	7635300	6916800	7686000	8275500	8729100	8409700	7024000	8175900	8510400	7751100	7947300
Metolachlor	428670	389000	298620	509470	386880	330900	432260	443200	280840	244170	289750	260890
N-(2-Phenylphenyl)-8-[4-(3-pyridinyl)-1-triazolyl]octanamide	22321	25600	22591	30629	26033	31277	31049	47027	144180	100080	117200	168930
N-Methylanthranilic acid	538810	442990	514650	544910	556270	555050	494280	539090	69904	55865	56655	63047
Norverapamil	36731	25497	31503	34818	38544	29247	45032	53781	3919.2	3130	9	4283.5
Octoxinol	1210200	1318400	1349500	1340400	1390900	1459100	1398200	1301200	1340500	1356100	1420700	1336000
Paradol	208560	168210	188530	192770	92113	92120	157230	101580	92085	138350	118370	91538
Pentoxifylline	9	9	9	9	9	9	9	9	482420	624280	564020	435830
Phytanic acid	223630	256650	310010	262420	144140	229450	243500	276280	20164	16939	14887	16279
Pioglitazone	9	9	9	9	9	9	9	9	64034	74953	68269	52794
Piperidine, 4-(5H-dibenzo[a,d]cyclohepten-5-ylidene)-1-[4-(2H-tetrazol-5-yl)butyl]-	15383000	14619000	12915000	17570000	33088000	31677000	36993000	40811000	1140100	789280	911540	1276300
Promethazine	1149500	1078400	1078200	1270000	1212700	1007100	1393200	1238700	25580	33139	39522	46313
Spectinomycin	847450	881140	672230	1110000	1648000	716890	1791800	1303900	31110	21217	33883	46463
Sudan I	137750	110750	148590	140020	150990	157060	145940	174180	8143.4	7201.9	7434.8	4572.5
Sulfadimethoxine	4107.7	3792.4	9	9	9	9	9	9	54196	66230	34466	48373
Sulfapyridine	1426200	1429800	1594100	1445000	1417500	1689600	1428000	1456800	1804500	1990700	1626800	1622600
Tribenzylamine N-oxide	7152400	7147900	5659000	9012000	10055000	6073500	11378000	11014000	439330	277210	305660	367120
Undecanamide, N-cyclopropyl-11-(2-hexyl-5-hydroxyphenoxy)-	376200	324120	222400	455630	1978000	1690100	2158600	2275300	181870	158600	150920	269640
Uralenneoside	9	9	9	9	9	9	9	9	22711	24252	29886	32895
Vanylglycol	12802000	13030000	13759000	11933000	12234000	11216000	13045000	12592000	3994300	6101000	5840900	5928400
Vardenafil	4037500	4469200	3913300	4643100	4420200	3783500	4418900	4492900	176540	124530	160810	207580
(25S)-7-Dafachronic acid	9	9	9	9	9	9	9	9	87060	68903	98373	89061
(2R)-2,4-Dihydroxy-3,3-dimethylbutanoic acid	117320	132380	106710	133270	58951	59690	66710	74421	3697400	3355500	2888100	3024900
(R)-1-O-[b-D-Glucopyranosyl-(1->6)-b-D-glucopyranoside]-1,3-octanediol	68777	75541	63281	77342	87466	64595	89754	90106	9	9	9	9
1-(9Z-hexadecenoyl)-glycero-3-phosphate	470130	434090	430390	555790	924680	937460	1037000	1088400	25296	14186	17484	25631
1,2-Dioctanoyl-sn-glycerol	577080	524810	591690	540130	1313800	1261100	1180100	1561000	61025	86705	78962	88053
10,20-Dihydroxyeicosanoic acid	132170	113770	122510	129880	63986	67588	59471	74438	60847	55478	50698	62491
10-Hydroxymyristic acid methyl ester	2527900	2058000	2102300	2827500	1847900	1806900	2055500	2563500	16840	22719	14078	11164
14,15-Leukotriene E4	9	9	9	9	9	9	9	9	94537	47033	60025	57879
15-Ketoprostaglandin E1	832540	918770	942890	792200	892220	861320	913830	888250	848640	868840	862600	855830
15-OxoEDE	10534000	7722700	8412000	9853700	8149700	9057700	9782700	9979800	203250	168140	183220	157640
16,16-dimethyl-PGE2	360550	343120	681860	563720	586780	484480	519070	652730	214220	219040	183560	212170
16-Glucuronide-estriol	97701	68680	102070	79760	75799	89284	112940	90936	99066	96151	93778	103710
1-eicosanoyl-glycero-3-phosphate	7713600	6621900	6143300	8305500	10601000	10611000	11790000	11737000	387710	225090	205700	312900
1-Heptadecanoylglycerophosphoethanolamine	12173000	13079000	9798500	11646000	16519000	17613000	19672000	20713000	596160	406480	529900	481510
1-Hexadecyl lysophosphatidic acid	168650	134410	153250	228090	240350	217580	247960	294150	28267	19327	28526	18563
1-Hexanol arabinosylglucoside	3369400	3216700	3119700	3699500	3475600	3126200	3578100	3890400	210420	178110	194090	210650
1-Hydroxy Vitamin D2	283150	221290	224040	377880	637540	520710	787720	807230	5549	13275	9552.9	7228.7
1-Myristoyl-2-hydroxy-sn-glycero-3-phosphoethanolamine	31813	26246	24194	45058	135990	123360	149990	188610	8145.5	4196.8	6027.2	15250
1-Palmitoylglycerol	153000	133130	135100	121560	121780	156210	253370	217840	75087	67959	52700	53783
1-Stearoylglycerophosphoserine	2658900	2249200	2090300	2870700	5012200	4860400	5641300	5897100	1370000	1061200	994670	1609700
2,2,4,4,-Tetramethyl-6-(1-oxopropyl)-1,3,5-cyclohexanetrione	9	9	9	9	9	9	9	9	844830	812560	641650	516950
2,4-Dihydroxyheptadec-16-ynyl acetate	80722	83254	87300	104760	101160	87854	69683	92319	82329	77520	67498	107060
20-hydroxy N-Arachidonoyl Taurine	9	9	9	9	9	9	9	9	17460	9977.7	11077	12559
28-Homobrassinolide	103220	101170	111020	108730	102870	99073	112470	94740	108990	120250	105820	112910
2-Stearoylglycerophosphoglycerol	8328100	8860600	8681200	8785700	4716100	4529900	6108900	6145500	5427700	3905500	3906800	5075800
3,4-Dimethyl-5-Propyl-2-Furantridecanoic Acid	40639	14398	15293	44388	27353	30151	17086	20974	9	9	9	9
3a,7a,12a,19-Tetrahydroxy-5b-cholanoic acid	9	9	9	9	9	9	9	9	31865	25768	33557	24972
3-Hydroxy-8'-apo-epsilon-caroten-8'-al	9	9	9	9	9	9	9	9	104310	43207	75705	76332
3-hydroxypristanic acid	9	9	9	9	9	9	9	9	4042.4	4739.6	4744.5	3499.6
3-Hydroxysintaxanthin	618860	774860	750990	737040	835280	652330	726040	748920	700640	670630	748760	746500
4-Androsten-17β-ol-3-one glucosiduronate	126660	157230	118720	138400	126090	101170	195260	148930	9	9	9	9
4-O-Methylmelleolide	3067000	2003900	2890600	3259100	1005200	1606500	1943800	895380	1043500	1115600	1029400	1043500
5-Androstene-3β,17β-diol	12668000	12034000	12245000	12724000	10687000	11381000	11495000	12145000	241170	190580	120860	137190
6-Maleimidocaproic acid	758300	468350	783500	689930	3430600	2157400	3882200	3794500	282170	368200	507550	481340
7alpha-Hydroxy-3-oxo-4-cholestenoate	9	9	9	9	9	9	9	9	8847.6	6384.2	6521.2	7653.1
7-Dehydrocholesterol	9	9	9	9	9	9	9	9	77406	49056	55244	68107
7-Oxo-11-dodecenoic acid	19918	21042	19658	22334	75485	63094	21384	77527	18836	21120	16968	12058
8-Geranyl-7-hydroxycoumarin	156550	125880	116840	162730	54773	61113	58101	64699	33975	48783	27399	16323
All-trans-Pentaprenyl diphosphate	4223500	3722700	2985400	4236800	5378000	5602700	6624800	6672200	387910	247000	231200	299210
Androsta-1,4-diene-3,17-dione	938180	901720	915310	929230	770780	873170	808370	814180	945260	1014500	868130	867560
Armillarin	2989000	1104500	2240900	2062000	146750	165060	364090	163800	1230900	1217600	1413100	1427000
Avocadene acetate	9	9	9	9	9	9	9	9	256550	228130	229140	206930
beta-Doradecin	60895	68368	67813	69376	63778	38714	71675	55997	81598	80034	53277	79427
beta-Sitostenone	648460	608520	572710	692870	1470500	1042100	1870400	1614000	40579	34598	46831	25293
Camelledionol	89656	97730	96165	114060	120110	153300	129760	128410	112690	148630	126270	144710
Citronellyl acetate	55853	58540	60372	68905	59842	57237	76523	74387	92140	96158	106170	90381
Citroxanthin	3373400	2915900	3533500	3222500	3898400	3398300	2895400	2561700	3374500	3570000	2604600	3020100
Cortolone	546340	367110	576410	633230	1357700	803870	1302500	1481700	7252.7	1998.3	4863.6	2162.3
Demethylphylloquinone	6830300	4488700	6936400	7684500	2470000	3359400	6141500	2845600	2473700	2302900	1949300	2095900
Digitoxin	492580	631060	530240	701120	819500	496860	776830	739160	9	9	9	9
Dimethylallyl diphosphate	337010	333620	308040	407610	265320	210820	359390	391860	812350	703760	617820	688500
Dydrogesterone	54954	53332	51921	38994	51579	56792	49115	56014	45357	41091	39369	41104
Eplerenone	9	9	9	9	9	9	9	9	102940	73242	79138	81256
Estradiol valerate	34314	38204	34414	32704	34988	38802	39247	43105	36640	37917	37114	32892
Ethyl 3-hydroxytridecanoate	9	9	9	16459	9	9	9	9	112830	82591	82177	83365
Fasciculic acid B	41130	38371	26411	53663	49973	52677	49546	52091	9	9	9	9
Glycerophospho-N-Oleoyl Ethanolamine	164520	105590	116550	124470	5668800	4685000	6264100	7212400	114400	80937	49515	177040
Glycerophospho-N-palmitoylethanolamine	68379	67968	70817	96551	3362200	2932300	2828800	3707000	12311	9	9	9
Glycochenodeoxycholic acid 7-sulfate	9	9	9	9	9	9	9	9	735780	503870	599090	614900
Hecogenin	9	9	9	9	9	9	9	9	123370	109710	118510	120720
Leukotriene A4	9	9	9	9	9	9	9	9	25875	22207	21221	22845
Lucyoside K	622030	554720	618330	497850	497690	442180	443610	423610	934260	916260	857730	872320
Lyngbic acid	8228400	8068300	7299600	7768300	8334600	7700700	7377100	6974700	7448500	8314900	8267400	7745700
Mesaconitine	3084300	3710900	2983500	4042700	3422100	2342400	4089700	3403800	88741	106350	115100	132560
Methyl myristoleate	26097	14335	24266	20966	101410	133990	175920	194380	517600	404090	635020	524300
Methylprednisolone succinate	6157300	4430000	6774800	7680600	2133500	3127500	5573200	2654400	2236700	2105200	1719200	2042300
MG(0:0/20:1(11Z)/0:0)	6690200	7596300	7003200	6920500	5936400	6177600	6580900	6392700	6824500	7690700	7615200	6567000
MG(15:0/0:0/0:0)	127850	129770	144880	123480	130090	145810	135440	109170	207650	232350	208030	223680
Muricatacin	1258400	1124000	1082100	1178900	1082300	986020	1287000	1064600	1152500	1186100	1100600	974630
N,2,3-Trimethyl-2-(1-methylethyl)butanamide	53449	56603	66358	62278	38149	49119	59229	62288	26941	25747	31063	22797
N,N-Bis(2-hydroxyethyl)dodecanamide	477740	258680	1705500	837990	121150	372530	596950	284840	34125	40058	38460	39347
N-Octanoylsphingosine	122490	222260	216490	207340	278620	196380	184300	191080	153660	140850	141700	122440
N-Stearoyltaurine	140200	126480	119270	130700	328130	206700	402280	324620	7244.5	9	9	9
Oct-1-en-3-yl 6-O-pentopyranosylhexopyranoside	497870	556940	507820	592160	506800	458140	570360	594910	20038	14983	16027	21870
Oxfendazole	652820	659540	674010	624140	665900	742170	711690	691540	882740	979290	792340	803860
Palmitelaidic acid	9	9	9	9	9	9	9	9	92747	88951	94430	100920
Palmitoylserinol	15158	9356.1	8621	12206	18631	9386.5	18233	17249	535450	418500	473700	544110
Prostaglandin E2 p-acetamidophenyl ester	90861	85396	91011	117200	333580	320180	379690	401710	125310	112700	120380	125520
Prostratin	221550	187430	222630	211440	225440	222630	254230	290090	236690	264310	325480	260980
Psychosine	9	9	9	9	9	9	9	9	83236	78431	80799	97689
Ricinoleic acid methyl ester	112490	95074	98494	120270	89471	94361	98396	109600	116170	82851	85684	94794
Santonin	301310	261950	247170	311650	296880	231570	306040	364540	4345.3	3782.3	4540.8	4518.4
Sorbitan monopalmitate	2169700	2032300	2117400	2308400	1930000	1908100	2258300	2502400	78657	78223	67009	72666
Stearoyl-L-carnitine	22348	15498	20953	16659	20363	21357	25199	19989	21856	21879	18316	17623
Sulfaphenazole	91272	84020	97524	91546	84873	114960	100640	106490	146750	185200	158720	160410
Tetradecanal	24368	27399	23318	19391	49389	66829	82981	84276	44659	29268	29938	23145
Toxin T2 tetrol	301130	283100	314480	492110	222270	236740	320420	233890	197880	259780	265610	186960
Triamcinolone	142380	130820	157620	159220	132570	152610	158460	176270	144620	122500	148320	109920
Tricaproin	491760	489410	506190	543640	460730	587830	523450	351070	570900	545600	502400	659360
Vitamin K	916200	806620	782720	683120	813300	915340	816260	707750	924110	830890	704770	759560
xi-5-Hydroxydodecanoic acid	17123	10934	26491	27067	17575	39264	25824	29447	62881	50884	60332	52000
β-Estradiol 3-sulfate	52430	36224	53402	32463	26788	32956	37017	18572	35594	25451	33166	34244
3'-O-Methylguanosine	10423	12973	7767.6	11187	9	8332.6	4347	5588.6	1729200	1596200	1574200	1608400
dTDP-D-glucose	9	9	6767.7	9	9	9	9	9	767180	676600	627750	548180
Thioinosinic acid	32184	26104	22389	33206	10966	15256	33649	19798	9390100	3242200	5613100	5235200
Thymidine-5'-diphosphate	16883	9186	9	9	9	9	9	9	94671	67903	66646	103190
UDP-N-acetylmuraminate	9	17046	9	17529	9	9	9	9	1731400	1059500	1082800	1506600
Zalcitabine	360800	307700	326340	360120	347840	311320	329360	355350	34673	24553	31602	23243
(-)-Indolactam V	6537000	7758900	6704000	8563600	10174000	5737300	10236000	11140000	360970	347980	359820	455740
(2S)-2-Isopropyl-3-oxosuccinate	9	9	9	9	9	9	9	9	79050	61222	59233	49076
(3R)-3-Hydroxy-2-oxo-4-phosphonooxybutanoate	9	9	9	9	9	9	9	9	1866400	2332400	642920	2267100
(S)-2-Acetyl-2-hydroxybutanoic acid	15873	15046	15996	13851	13146	13577	10778	11856	13572	13681	12247	10425
1,3-Thiazolidine-4-carboxylic acid	9	9	9	9	9	9	9	9	5271800	2629600	8227200	5784200
2,2,4-Trimethyl-1,3-pentanediol diisobutyrate	97681	110980	98690	84448	102500	70607	78317	74127	77463	91556	89622	81238
2-amino-4-({1-[(carboxymethyl)-C-hydroxycarbonimidoyl]-2-{[(4S)-4,10,14,16-tetrahydroxy-5,9,11,13,13-pentamethyl-2-[1-(2-methyl-1,3-thiazol-4-yl)prop-1-en-2-yl]-12-oxo-1-azacyclohexadec-1(16)-en-5-yl]sulfanyl}ethyl}-C-hydroxycarbonimidoyl)butanoic acid	327790	400270	352210	445920	476860	329480	500510	493990	21978	21670	13390	13907
2-Phthalimidoglutaric acid	94903	101180	87256	96500	53318	43266	58900	66107	13242000	4946200	6599200	6320200
3-Dehydroquinic acid	4018.7	7001.6	8781.8	4465.5	3937	6006.3	2948.7	6381	2199600	1285100	1312000	1297800
3-Hydroxycapric acid	42789	39602	33533	45637	34663	32966	38643	49619	36561	31040	52963	34878
3-Oxododecanoic acid	11314	13053	12291	9971.4	10282	7922.1	13005	14544	21824	14723	12029	13729
Acetylleucine	158610	187260	128550	164940	57017	51072	63409	61844	687920	694590	745760	641500
Ala-Val-OH	193410	174790	164320	233140	40635	52087	49318	75235	9	9	9	9
Amastatin	6115700	6401100	5644700	6814300	8366200	5913400	8080100	8782600	191550	117740	170510	145620
Asn Phe Arg	5042600	5867000	4586200	6798000	6562700	5277100	6987900	6666900	157520	165180	173420	262490
Asp Phe Arg	4039600	5988000	3199300	7102800	14229000	7687000	18358000	17040000	52404	24824	49738	40133
Benzeneacetamide, N-[(1S)-2-[[(7S)-6,7-dihydro-5-methyl-6-oxo-5H-dibenz[b,d]azepin-7-yl]amino]-1-methyl-2-oxoethyl]-3,5-difluoro-alpha-hydroxy-, (alphaS)-	248930	306550	291920	299670	390260	242760	388450	353280	10743	5843.1	10000	10238
Benzoic acid, 3-[[(3-carboxycyclohexyl)amino]carbonyl]-4-[3-[4-(4-phenoxybutoxy)phenyl]propoxy]-	9	9	9	9	9	9	9	9	198740	125480	153580	108860
Cys His Arg	9	9	9	9	9	9	9	9	2018300	1921300	2253300	2185300
Cys Ser	9	9	9	9	9	9	9	9	3396000	1499300	2325300	2159000
D-Arginine	9	9	9	9	9	9	9	9	25486000	24173000	27352000	25308000
D-erythro-Imidazolylglycerol phosphate	9	9	9	9	31831	11087	9	9	2953900	2267400	638270	4165600
D-Galactonic acid	360890	414010	308260	311330	187870	165520	203300	180630	421900	402460	616910	464000
D-Pantethine	352820	442960	451500	709520	1104900	358030	2452400	1020200	110300	90864	108780	128390
gamma-L-Glutamylputrescine	9	9	9	9	9	9	9	9	14296000	10091000	18859000	11167000
Glu Ala Lys	367320	421700	280740	321730	845770	367030	972440	756190	2511900	2476100	2363900	2676300
Glu Asp Ile	5137700	5238600	5476600	5231100	2867000	4617300	3866400	3732800	433780	180600	517630	315560
Glu Ile Ser	4414700	4634100	4414100	4211800	5072700	4118600	4867300	4486200	1757400	2196300	2981200	1980200
Glu Leu Lys	484230	517990	505870	533580	550080	443460	505250	507790	626070	633280	876520	721320
Glu Met	6810900	7050600	7134600	6771400	7077900	4818600	6976900	7165700	20969000	9675900	15489000	12457000
Glu Pro Lys	9	9	9	9	9	9	9	9	4712400	3564500	4825500	4098900
Glu Val Val	260820	241740	258920	268230	233610	155170	153800	170880	3039900	2416000	3478700	3653100
Glu-Ala	11407000	12831000	13469000	11788000	12940000	11366000	14682000	12961000	428210	447230	396540	599000
Glu-Asn	6277100	7527100	6618000	8342500	12630000	9041300	12417000	13111000	37908	57009	41596	50563
Glu-His	2411600	2185400	2426900	2132100	2186100	2127300	2373300	1702400	4881600	3483200	7466000	5411800
Glu-Lys	31173	47122	23644	40900	70586	30852	76608	79900	446330	398840	436800	327170
Gly Leu Met	11201	9	9	9	9	9	9	9	3955700	3330600	3590400	3801500
Gly Pro Glu	8882.6	10016	7160.3	15616	8441	13060	23138	15210	4261400	4156700	5591700	4997500
Gly Val Lys	9	9	9	9	9	9	9	9	163300	88998	115570	161360
Gly-Arg	9	9	9	9	9	9	9	9	535780	439520	590970	446750
Hexylglutathione	961180	874140	953330	930460	485840	644600	341880	667000	9	9	9	9
His Gln	9	9	9	9	9	9	9	9	2560000	2330600	2530700	1883200
His His Lys	9	9	9	9	9	9	9	9	4129500	4282600	4511400	4276300
His Phe Arg	7786700	6742200	7884100	7079400	4982300	6403000	3839400	5700600	108660	81032	76390	73876
His Thr Lys	9	9	9	9	9	9	9	9	568530	443350	701860	608160
His Tyr Arg	412160	421500	477740	389800	584870	416930	539160	505630	18599	16787	14523	19253
His Val Arg	1478700	1861600	1699900	2361900	3483800	1843300	3360700	2962500	9	9	9	9
His-Cys	8420200	7577600	5716300	10007000	8960900	8960300	7029600	10162000	378350	965210	381150	936140
His-Phe	4161700	3854500	3744300	4656300	3971100	3273600	4337700	5221100	182640	166270	264550	217540
Hydroxyprolyl-Isoleucine	9	9	9	9	9	9	9	9	2091900	2293000	2479000	2409500
Hydroxyprolyl-Threonine	120340	109800	127830	114550	141020	110640	138450	162290	15073	15280	13153	17876
Ile Ala	66186	49017	57308	79712	67307	76383	65648	37671	2539100	1947200	2319000	2113600
Ile His	28919000	31569000	29063000	25513000	33479000	28085000	34184000	37837000	1153300	1193100	1286700	1500800
Ile-Asn	368480	366790	361130	395790	335560	313440	355190	400650	16989	13303	9	9
Isoleucyl-Tyrosine	1218900	1347300	1089000	1484600	1759700	1131500	1642800	1926200	29609	25151	47203	34275
Kainic acid	15219	21868	14145	16156	9045.2	8205.2	7901.3	11370	3497.8	2341.3	2964	9
L-Agaridoxin	9	9	9	9	9	9	9	9	1920300	1592600	1415500	1787000
Leu Ala	2826600	2637400	2970400	2650300	2963900	2631600	2934600	2679900	233130	266140	307300	317260
Leu Asp Gly	122060	102320	151240	103710	142180	89174	130930	99880	146330	100930	113350	110760
Leu Glu	5095100	5662900	5445400	5205000	5399300	5822300	6394000	8964000	764820	669560	666900	620430
Leu Phe	1950200	2192000	1659800	2296000	2448800	1944900	3027700	2894500	37978	47393	64932	50824
Leu Phe Asn	189560	174930	237100	188140	190040	261970	221040	222920	175100	202560	248330	185620
Leu Phe Asp	9	9	9	9	9	9	9	9	396650	260330	240830	229190
Leu Thr Asp	9	9	9	9	9	9	9	9	984860	876010	1012700	894720
Levetiracetam	1035700	1412900	1441600	1350000	1611900	1405700	1720400	1817200	165070	196820	245260	146030
Lisinopril	447160	509670	488720	712270	618070	477320	661000	771480	15286	16295	18361	26490
Lys Pro Glu	9	9	58423	60485	119390	126260	132840	81346	1672000	1396700	1777000	1988100
Lys Trp Lys	28472000	32854000	24956000	32982000	40086000	27741000	47565000	48653000	1127700	994540	1200600	1135700
Lys-Asp	9	9	9	9	9	9	9	9	531010	484030	666600	478020
Lys-Cys	83435	50156	59319	70078	60647	121830	126410	141850	4150800	2567700	4041300	3406000
Lys-Gly-OH	9	9	9	9	9	9	9	9	307550	292030	224840	322690
Lys-Pro	12281000	11301000	17537000	13004000	11736000	10067000	12354000	12631000	1377500	1190200	1773400	1345500
N-(4-Aminobenzoyl)-β-alanine	9	9	9	9	9	9	9	9	132390	162580	162270	128290
N1-Acetylspermidine	603210	765620	569480	681240	309640	414410	291340	322500	18767000	21841000	22758000	17417000
N5-(1-Iminoethyl)-L-ornithine	9	9	9	9	9	9	9	9	558920	422960	675330	512190
N5-Acetyl-N2-gamma-L-glutamyl-L-ornithine	9	9	9	9	9	9	9	9	288930	206800	261130	228030
N-Acetylglucosaminylasparagine	90742	80726	84854	114370	86724	82877	95527	111050	825940	740950	700060	685590
Nateglinide	1044600	833150	1039000	1197100	973530	786930	963580	1036200	11266	4598.8	8567.4	6369.8
N-lactoyl-Tryptophan	3486600	3577300	3351400	3634500	3680600	2884600	3768900	4100200	150470	148280	162790	167120
N-Palmitoyl-L-serine phosphoric acid	4907800	4036900	3993000	5588200	13341000	11821000	14940000	16910000	944340	662730	658540	920730
N-Succinyl-L-glutamic 5-semialdehyde	9	9	9	9	9	9	9	9	1364100	919320	1041900	1073300
N-Tigloylglycine	7086700	7745700	7012300	8593000	6773900	8814000	8132200	8387000	7648500	7924300	7961300	5930600
Ophthalmic acid	67057	55144	150360	86655	79667	50350	85204	93244	18741000	17602000	14398000	17261000
Pentyl acetate	8124.8	6624.1	7570.6	5747.3	21850	9703.9	65681	22961	8388.1	9386.7	6653.3	11353
Phe Ile Lys	892790	833060	1017500	879180	521420	593980	396220	662100	9	9	9	9
Phe Leu Lys	19139	32262	33832	21354	48678	33316	68090	49265	1079200	757880	1111800	839620
Phe Lys	14821000	15418000	11278000	11881000	17160000	12484000	17601000	17528000	334610	365530	388970	512220
Phe Pro Ala	618930	544930	534290	644110	573160	542880	622120	564170	9	9	9	9
Phe Pro Glu	10675000	10702000	11338000	10033000	5509500	7308100	3978800	6512000	40334	21381	21752	30918
Phe-Gln	16991000	23825000	20627000	22825000	23567000	20899000	25506000	25271000	453050	518990	591410	500390
Phe-Gly	7024700	11312000	9030800	10408000	12756000	10189000	16604000	22342000	91285	70977	110620	80705
Phenyl dihydrogen phosphate	30025	28470	30773	31483	25065	33878	35259	36359	39742	39583	41778	36251
Phenylalanyl-Arginine	78323	79430	36125	114770	93645	32833	108200	55764	9	9	9	9
Phe-Thr	7240300	7639500	6531800	8220200	8499100	6570900	8614200	9584100	186910	135300	216110	204190
Phe-Tyr	1502100	1415200	1362900	1928200	1642500	1247200	1727400	1833200	21163	17535	24316	14703
Phosphonic acid, P-[(3R)-3-amino-4-[(3-hexylphenyl)amino]-4-oxobutyl]-	206680	260810	240530	203510	271880	150560	271340	299970	7813.9	5715.4	5246.6	12698
Pirimiphos-ethyl	343090	322010	381030	439130	513090	484590	451270	504020	9	9	9	9
Pro His Arg	890110	884760	1053200	926480	599950	880190	586390	763280	305500	321820	319300	393460
Pro Ile	2762200	3203300	3877500	4376000	4105400	3061700	3857900	4253600	309360	260390	399790	372020
Pro Phe	29840000	35329000	36559000	39569000	31788000	23812000	32972000	34958000	855030	759750	801670	968100
Pro Phe Leu	13121000	14752000	12303000	13341000	15637000	10928000	16336000	13992000	380910	283270	417610	467940
Pro Ser	9143700	12051000	11368000	10213000	13006000	8912500	11940000	13729000	1085000	1073300	1203900	1225700
Pro Tyr	720670	684200	733300	684090	659880	509260	772670	492800	36256000	16917000	26331000	19623000
Pro-Asn	10056000	7795400	9865000	9684200	10964000	9519300	10176000	10406000	1067400	1101100	1069600	1237900
Pro-Gln	17415	9	9	9	9	9	9	9	1819500	1380500	1246900	1627100
Prolylalanine	59159	40413	70886	53544	54227	51772	54308	80589	1381700	1290300	1648600	1537100
Prolyl-Tyrosine	9	9	9	9	9	9	9	9	356760	291610	252590	235970
Pro-Met	3979900	3754400	3282200	2995100	3418400	3138600	3627900	2763600	320010	305380	364230	328270
Propyl propane thiosulfonate	11887	9004.9	13958	10554	13877	15609	13462	10455	7817.6	12236	9699.3	11206
Pro-Thr	1041400	1091700	1243400	1188200	1381400	922240	1367300	1401700	279420	220700	354160	300790
Pyridinoline	9	9	9	9	9	9	9	9	50142	49208	47748	54405
Ser Phe Arg	214970	265450	260730	275490	320740	263760	306970	371860	1584700	1774600	2174100	1672400
Ser Val	103090	96784	123790	82738	131470	89734	128610	102800	9167300	7264600	11138000	8695800
Ser-Cys	403310	356590	417100	298610	310070	350710	428400	621160	285300	261040	265830	417710
Syndesine	9	27101	24198	15716	31607	20036	23638	37129	48626	44637	56482	44036
Thr Glu Lys	1384100	1431100	1102600	1411500	1610300	1291100	1815600	1961700	602250	564120	824250	750800
Thr Lys Glu	9	9	9	9	9	9	9	9	1770800	1522600	1905000	1763300
Threoninyl-Threonine	2433200	2536800	2784900	2313700	2474800	2218400	2379300	2077300	4869200	4001100	9026900	5342500
Trp Asn	1173000	1315000	910680	1603400	2377900	819420	3866500	2329900	66053	56657	67595	95110
Trp-Cys	1200600	1009200	1010600	1318700	834590	610990	1101200	880850	10998	13796	13792	13441
Trp-Gln	9	9	9	9	9	9	9	9	42833	33654	25829	28934
Tumonoic Acid A	9	9	9	9	33867	22731	21265	24797	70048	68537	66648	56627
Tyr Ala Lys	1785400	2119800	2202500	2204600	1943500	1880300	2113500	1921000	1814900	1787600	1688800	1901500
Tyr Met Arg	2715400	2903900	2730500	3089000	3071900	2465400	2701900	3215300	114850	66597	93994	85590
Tyr Pro Phe	2105700	2324000	1923900	2297300	2062800	1638500	2485000	2695000	110640	94377	152210	118660
Tyr Ser Val	9	9	9	9	9	9	9	6300.2	466580	417060	614420	602420
Tyr Thr Lys	29756000	40942000	29158000	40857000	62491000	49502000	83470000	71089000	80792	9	9	9
Tyr Val Gln	4993800	5854400	5525100	6573400	6341000	4855900	6142500	6120000	1524800	1307600	1399700	1653400
Tyr Val Lys	184570	236610	175830	252760	342790	245750	407600	339660	7091.1	12254	14905	11811
Tyrosyl-Isoleucine	3012800	2819800	2687900	3708200	3112500	2649300	3171100	3069600	67008	53590	83286	80534
Tyrosyl-Proline	7461600	8607700	8265700	7831300	6100300	6809000	8310800	6915800	180350	230910	296850	272180
Tyrosyl-Serine	9438800	9860900	7067800	6750800	2260800	2530400	2730700	2971600	9373200	5099600	6933400	6789100
Tyr-Pro	322440	325510	322110	361920	305820	289500	299330	365860	9	9	9	9
Tyr-Ser	9	9	9	9	9	9	9	9	611180	498440	464640	561930
Tyr-Val	5792100	6603300	4660900	6456200	7946100	5906700	9586600	8215100	121220	58218	65543	125480
Val Lys	3300200	3258700	3045200	3801800	2874100	3928500	3836900	3835400	196750	161760	183970	120070
Val Phe Lys	73756000	67425000	83371000	70892000	30339000	48828000	24157000	39087000	198410	117430	185000	172240
Val Pro Arg	1753300	1621700	1210100	1747300	864820	1385700	1579200	1108600	160950	116240	241500	258550
Val Pro Leu	144700000	136010000	150960000	140540000	91710000	97199000	71519000	108740000	379830	409090	342010	288610
Val Tyr Asp	125060	164570	133380	147690	156710	87573	158490	150300	133150	159380	162780	159850
Valganciclovir	9	9	9	9	9	9	9	9	415190	338520	362000	369380
Valyl-Serine	3288700	3537500	3133200	3063700	3378600	2626800	4251000	4479000	32928	9	41823	52640
Zanamivir	6297500	6739800	7313400	6730900	6693300	6827500	6728700	6776300	2544100	2235600	2330900	1915800
3-(Dimethylamino)propionic acid	1541500	822430	1324400	1972700	2167200	2007900	3186200	1745700	117010	136400	98181	80993
Dehydrophytosphingosine	673000	678740	671780	806060	751550	632660	643700	544340	692060	697610	746070	720210
Dicyclohexylamine	3368700	3912700	3242200	3681400	3558900	3348700	3790000	3099400	3482400	3198500	3458700	3843300
Eicosapentaenoyl ethanolamide	39664	33255	28758	34430	39419	37235	37058	38611	31048	30359	26067	50871
Memantine	435760	458970	492290	434360	436870	452940	474920	425350	546700	579180	505440	487440
N,N-Dimethylaniline	4177000	1878600	4540700	3810800	667310	631410	2347900	701450	175510	313140	293340	266690
Tribenuron-methyl	129750	144250	128860	157310	130900	131400	135160	151840	6929.8	6377.9	7924.9	11166
1-Deoxy-D-xylulose 5-phosphate	254080	140560	230850	145880	545940	548340	453550	599880	407570	565080	530520	640820
1-Methylcyclohexanol	40547000	27636000	45175000	31486000	3813800	5457800	62125000	4628400	4253300	4097300	5235200	4386000
1-Palmitoylglycerone 3-phosphate	12832000	11255000	9979900	14242000	29370000	23872000	31226000	34165000	7028900	4755500	5143500	7847400
2-[4-(3-Hydroxypropyl)-2-methoxyphenoxy]-1,3-propanediol 1-glucoside	44826	45845	45685	41920	44245	54013	46566	42616	4624	4544.2	4786.4	4777.8
4-(Methylnitrosamino)-1-(3-pyridyl)-1-butanone	4890.6	5195.2	8124.1	5935.3	21043	9627	65186	18620	7686.2	8024.2	5166.2	9769.5
4-Oxo-4-(3-pyridyl)butanal	71442	79227	96733	83962	83738	88226	79209	85669	64482	71845	68453	69545
6-[5-(2-{[3-(3,4-dimethoxyphenyl)-1-hydroxyprop-2-en-1-ylidene]amino}ethyl)-2-methoxyphenoxy]-3,4,5-trihydroxyoxane-2-carboxylic acid	180910	166760	154500	206410	160170	134050	142630	189220	9	9	9	9
Bebeerine	16991	22924	15809	42371	26550	12683	37309	32966	9	9	9	9
beta-D-Fructofuranose	9	6341.4	4988.3	5439.5	6851.7	5507.2	6872	8620.2	48693	32867	23568	67175
Cellulose, microcrystalline	9	9	9	9	9	9	9	9	2316800	802970	1491900	1780800
Cymorcin diglucoside	720880	1372400	716190	1289300	3220900	1118900	3944700	2929700	51385	41119	65880	87966
D-Glucono-1,5-lactone 6-phosphate	2217300	2349800	1904200	2096000	1561300	1642900	1521400	1516000	9219000	9419200	7936900	8761100
Dronedarone	13209	6115.8	14290	9124.1	24877	46842	34274	25021	690680	467030	530050	454860
Erythritol	8027000	6726900	7953100	7517800	7959500	8222800	7979000	8943300	7286300	8189300	7749200	7755200
Ethanol	22199000	23202000	22167000	20831000	21200000	18687000	23071000	20325000	7151600	10079000	9649200	10122000
Ethoxyethoxyethanol	712580	818120	874510	674160	653280	721310	655080	519330	683580	705970	671770	635590
Heptaethylene glycol	1411200	1409700	1151900	1304100	1324300	1400100	1693300	1361800	873780	696810	904680	883730
Hexaethylene glycol	1915800	1808600	1757000	1390900	1675000	1550800	1794600	1743100	1365900	1095500	1362400	1788000
Monohydroxyperhexiline	429980	457110	404160	542270	218660	225040	241700	281480	213850	162430	185080	233010
Muscone	9	9	9	9	9	9	9	9	15626	11289	13365	11272
Oleana-1,9(11)-dien-28-oic acid, 2-cyano-3,12-dioxo-	9	9	9	9	9	9	9	9	19624	13435	16209	19836
Phenethyl rutinoside	111520	110220	110990	149170	136790	106650	127580	115360	9	9	9	9
Phenyl beta-D-galactopyranoside	9	9	9	9	9	9	9	9	62617	46465	43474	59905
Pisatoside	9	9	9	9	9	9	9	9	7763.1	5422.1	9	9
Semilepidinoside A	9	9	9	9	9	9	9	9	1931.9	6222.6	7664.2	12582
Streptomycin	9	9	9	9	9	9	9	9	1011500	854880	1075400	1152400
trans-5-O-(4-Coumaroyl)-D-quinic acid	323060	316300	302060	322850	268450	258360	258270	334610	9	9	9	9
(3-amino-1H-1,2,4-triazol-5-yl)methanol	1261200	930970	772290	1005800	664460	906390	685710	704580	545810	582190	763860	950010
(3R,3aR,7aS)-3-Butylhexahydro-1(3H)-isobenzofuranone	71656	61968	72750	65056	71153	69430	73638	70043	66340	68967	65035	60664
[(1S,2R,5S,7S,8R,11S,14S)-11-Hydroxy-7-(2-hydroxypropan-2-yl)-1,2-dimethyl-6-oxa-23-azahexacyclo[12.10.0.02,11.05,10.016,24.017,22]tetracosa-9,16(24),17,19,21-pentaen-8-yl] acetate	205310	180660	202970	194930	235790	194750	343310	363280	9	9	29557	36533
1-(2,3-Dihydro-1H-pyrrolizin-5-yl)-1,4-pentanedione	3756900	3605400	3928600	3969200	3821700	4000200	3974800	4262400	4153600	4030600	3943800	4214400
1,2-Bis(2-pyridyl)ethylene	871750	761720	1087700	1433000	2453700	1991500	3412300	2470000	281850	315460	251290	411890
1-[3-(4-Decoxyphenoxy)-2-oxopropyl]-3-methoxycarbonylindole-5-carboxylic acid	199980	153490	148500	187950	137600	137430	162020	182080	9	9	9	9
1-Hydroxytacrine	9	9	9	9	9	9	9	9	5288000	4781100	5501000	5512800
1-Pyrrolidinecarboxaldehyde	9424600	8745000	9232100	9415800	9526200	10229000	10050000	9624700	9868200	10192000	9554000	9600100
3-[1-[3-(Dimethylamino)propyl]-5-methoxy-1H-indol-3-yl]-4-(1H-indol-3-yl)-1H-pyrrole-2,5-dione	1886200	1989600	1857100	2064600	2120800	1573800	2196300	2346300	51225	38951	40768	58384
4-(3-Pyridin-2-YL-1H-pyrazol-4-YL)quinoline	9	9	9	9	9	9	9	9	181550	181870	121920	77042
4-(Methylnitrosamino)-1-(3-pyridyl)-1-butanol	382240	490620	451170	524020	211730	250550	974670	207850	235660	270520	201040	284610
4-Acetoxy-2-hexyltetrahydrofuran	9	9	9	9	9	9	9	9	18990	12782	9	9
5-(2'-Carboxyethyl)-4,6-Dihydroxypicolinate	66511	67583	74088	98328	70615	63566	77636	79093	9	9	9	9
5-Acetylamino-6-formylamino-3-methyluracil	9	9	9	9	39829	22849	45347	41282	30010	33543	19293	35602
5-Methyl-THF	8558300	9987600	8362400	8740900	10285000	6730900	12808000	10735000	2905500	2576600	2650700	2562000
6-Hydroxy-1H-indole-3-acetamide	3501500	3675800	3516100	3619300	4623100	4207400	5238900	5722000	931740	1054700	817280	1159000
Aceclidine	65762	90017	124130	64470	55908	46821	79672	81242	220870	155800	111720	36452
Acrimarine I	1302600	860350	770440	1261100	236070	174390	254840	303020	159700	117150	117740	164680
Aldehyde Reactive Probe	66894	55873	63590	72724	97918	118010	127740	125040	354290	282850	346460	394500
Alprazolam	3014100	2486400	2709400	3632300	4744400	3442700	4732600	5318700	85834	65240	56489	61131
Arachidonoylserotonin	1227900	1229200	1272200	1227600	1252300	1372200	1391100	1322900	1360700	1412300	1489400	1444000
Brassica napus non-fluorescent chlorophyll catabolite 3	36218	39395	35139	42655	36841	29432	50116	41642	9	9	9	3566.5
Butopyronoxyl	365970	338040	341910	351340	278490	291250	313990	325190	83386	95786	113790	99439
Calcimycin	9	9	9	9	9	9	9	9	46090	27874	29078	34421
Cetylpyridinium	15150000	95081000	31507000	52486000	302050000	297550000	289550000	326160000	1487600	1092400	688460	802960
desmethylastemizole	9	9	9	9	9	9	9	9	88460	57420	61745	71325
desmethylclomipramine	572160	488120	588250	565940	482710	442650	398750	433920	513580	403330	610110	572500
Diacetylfusarochromanone	9	9	9	9	9	9	9	9	68150	53892	44196	57502
Dihydropteroate	9	9	9	9	9	9	9	9	4096.1	3782.3	5913.8	16556
DL-α-Lipoic acid	6471300	7167100	7421600	7330000	7179900	7923200	7814900	7355500	6619600	6190600	6795300	6293500
Dodemorph	195020	372690	198390	1051400	2528400	2329100	2550600	2225100	22903	26191	31168	21952
Donepezil	333100	391200	377300	342510	326000	265350	256860	271250	441440	437730	414800	386790
Ellipticine	413610	271420	433960	425960	1936400	981670	2800800	1783700	41969	37599	28727	22946
Famprofazone	1250000	1064800	1044900	1511700	2692100	2490400	3151100	3399900	9	9	9	9
Flindersine	1026500	997600	1043100	1058300	1063600	1098200	1104700	1167900	1122800	1178900	1045900	1207900
Fluphenazine	201310	200190	203240	180280	194820	171610	218390	213820	11531	6780.5	5301.8	8762.5
Indoramin	94916	94916	97442	93923	105670	80762	96499	99158	9	9	9	9
Iproniazide	2149100	2458800	2600900	2512600	1995200	2446100	2279100	1851700	2238100	2235900	2223800	2041900
Isolinderanolide	3600700	992520	909860	4585300	4536700	3902000	2366900	3692700	129840	49028	16650	32209
Linagliptin	2049900	2308800	1650100	2600300	3132000	1745800	3785700	3219000	47142	48860	71242	50440
Macluraxanthone	957590	414970	301280	1037000	1596100	1663200	1186300	1486000	20793	11936	4334.4	7725.9
Mangiferin	9	9	9	9	9	9	9	9	941890	1051100	1292900	1013900
Marbofloxacin	76369	80432	68172	87515	91742	51400	95182	115070	23048	17037	20602	22785
Mepiprazole	9	9	9	9	9	9	9	9	899350	791150	823100	957240
Mirtazapine	438220	445730	455430	465890	434540	498830	507710	515470	503090	537630	426390	529860
Molinate	3996200	4059200	4210600	3979500	4157200	3929900	4167600	4174800	4103600	4542700	4529200	4314000
N-(3-acetamidopropyl)pyrrolidin-2-one	295720	309960	317500	319160	359380	294450	335930	373830	23876	20459	19789	25350
Nialamide	753670	586220	631030	1125100	523860	544910	690150	439450	261430	318090	366310	264450
Nitroxoline	1539000	1918800	1836900	1774700	2059100	2228000	1626300	2199000	2014900	2090800	1904400	1880100
Nizatidine	814910	737580	701840	853860	890720	626350	771800	799080	25070	22324	34922	28910
N-Oxyclozapine	609630	525050	509570	836300	856410	418810	1330000	735580	633410	1064300	791890	604090
Paliperidone	173320	133720	130870	114760	130090	160680	180880	158920	360430	287910	338260	347810
Pefloxacin N-oxide	931410	692970	782090	944280	892120	803540	949390	1091800	7915.5	5485.4	6799	8016.9
Pheniramine	9	9	9	9	9	9	9	9	242020	166510	254170	255350
Probenazole	490010	549410	519640	571020	572600	558430	584800	593280	460540	419670	452590	457600
Pyrazine-2-carboxylic acid	5854200	6510800	6399100	6802000	6601600	7080600	7827300	6982200	9011500	8399400	9340300	8230400
Quinomethionate	253360	249880	274030	285410	241190	280810	273800	266150	271210	269560	249950	232920
Rhynchophylline	1231200	1501400	1276300	1414200	1002200	1136700	1094700	1125800	971730	1403900	1330900	1256000
Riboflavin reduced	2597800	2818600	1885600	2709900	693760	799290	941270	1047700	2183300	1223200	1505000	1640400
Riesling acetal	1356200	1394500	1502000	1405400	1422700	1334500	1367300	1431000	1748500	1773400	1519700	1505200
Rutaecarpine	1865600	1776500	2001900	1926900	1911600	1966900	1972900	2073500	2056000	2145500	1871800	2123800
Sancuso	344800	339250	287310	442260	268950	337090	433590	377500	20056	12244	18951	16695
Tanakamine	331440	315780	342150	340450	313120	401170	333870	349410	341920	335020	326950	317910
Tetrahydro-L-biopterin	9	9	9	9	9	9	9	9	3096200	2862600	2968800	2927700
Ticagrelor	315950	342900	281090	328640	296000	276150	399950	333770	17470	13670	26428	16166
trans-Epoxysuccinyl-L-leucylamido(4-guanidino)butane	594220	527190	545850	494980	587060	528540	535830	590360	4535600	3407000	4481300	3422100
β-Hydroxyethyltheophylline	579340	606590	743240	622310	596600	725910	758560	593340	661510	637910	724680	579190
β-Lapachone	1110700	1324800	1389500	1031000	692440	438760	2739800	703450	526160	530400	363600	337490
4-Hydroxyphenyl thiocyanate	364580	317600	330460	339110	342400	360650	351530	373750	387510	405230	368920	362140
(+)-(1R,2R)-1,2-Diphenylethane-1,2-diol	9	9	9	9	9	9	9	9	40473	30421	39387	36866
1,7-Bis(4-hydroxyphenyl)-5-methoxyheptan-3-one	135420	187400	154740	143510	169900	223870	197760	177690	9790	16189	20238	19078
2',6'-Dihydroxy 4,4'-dimethoxydihydrochalcone	1225100	936940	1011700	1155200	1021100	1073800	1187000	1283700	293100	337070	271420	269790
2-{6-[2,4-dihydroxy-3-(3-methylbut-2-en-1-yl)benzoyl]-5-(2,4-dihydroxyphenyl)-3-methylcyclohex-2-en-1-yl}-5-[(E)-2-(2,4-dihydroxy-5-methoxyphenyl)ethenyl]benzene-1,3-diol	9	9	9	9	9	9	9	9	255420	144240	162810	180520
2-Hydroxyibuprofen	109840	95521	111670	96542	97438	102660	93205	90038	109660	113820	110930	104420
3-(3,4-Dimethoxy-5-phenylmethoxyphenyl)-5-hydroxy-6-methoxy-7-phenylmethoxy-1-benzopyran-4-one	2364200	1118900	2728700	2894000	349600	322390	1152900	326340	9	9	9	9
4',5-Dihydroxy-3',6,7-trimethoxyflavone	79560000	47141000	81723000	103810000	5666900	8605400	127490000	10278000	3317100	4134700	4086400	3740000
4-Hydroxytamoxifen	9	9	9	9	9	9	9	9	109800	129450	34865	33544
5,7-dihydroxy-2-(3,4,5-trihydroxyphenyl)-3,4-dihydro-2H-1-benzopyran-4-one	662700	689680	750390	660750	671190	819180	719870	652420	1181700	1350100	1115900	1067700
6',7'-Dihydroxybergamottin	826860	752760	657960	918610	1392600	1302300	1487000	1423700	9	9	9	9
Aflatoxin M1	321970	336250	318170	315390	302110	324590	339410	316060	297350	315020	295760	291900
alpha-Cyano-(3,4-dihydroxy)cinnamide	9	9	9	9	9	9	9	9	2240200	1639500	1120500	1091700
Apigenin 6,8-di-glucopyranoside	163850	179270	152390	175210	176400	167970	188520	185790	13563	12945	13172	13558
Carbidopa	425830	448330	421280	486700	449530	417710	471960	477130	120340	110100	122660	117480
Carboxyibuprofen	447420	229300	431830	533730	152210	201270	214530	229740	473040	382910	396760	397100
Clausarinol	15317000	6859000	11336000	13006000	1261900	2178100	3122600	1414000	5144200	6089500	5265400	5923900
Cochliophilin A	638060	476360	632490	665840	1083700	818560	1167900	1241300	9	9	9	9
Ferocaulidin	4609700	4127900	4384400	5636800	3080300	4176200	3819500	3917900	2189400	1488800	1577300	1958900
Herbacetin	9	9	9	9	9	9	9	9	158880	239550	252870	414320
Ivermectin B1a	1043700	706070	652570	1065600	818730	891180	1264500	1300400	12334	15306	12538	12777
Licochalcone A	27701	27687	32405	24502	18023	21966	15053	12043	22176	17219	20075	23415
Minocycline	205800	200360	192690	216380	261640	189690	275270	282940	8321.8	7742.7	6980.1	8323.7
Osthole	1116400	904490	1200400	1289700	5355900	2642800	7665800	4796100	94826	95605	97733	71367
Salvianolic acid A	154030	155640	168310	172850	156160	183850	176980	174600	146930	163020	146840	114890
Schizandrin	9159600	5292900	11657000	13440000	1844900	2826700	5772800	2836900	1822700	2180100	2109200	1657600
Tigecycline	1674400	1663600	1508300	1759700	1672700	1498000	1768000	1672000	44615	41072	46836	72764
Wuweizisu C	9	9	9	9	9	9	9	9	82664	55991	66863	53304
(10S)-Juvenile hormone III acid diol	9	9	9	9	9	11934	9	9	38914	24937	35026	29719
(11S,13S)-3-Amino-5,12,13,14-tetrahydroxy-14-(hydroxymethyl)-8,10-dioxa-2-aza-4-azoniatetracyclo[7.3.1.17,11.01,6]tetradec-3-en-9-olate	6701.9	8733.9	4884.4	7275.3	6447	8362.3	8546.7	8005.2	99428	107360	95418	85343
(1R,6R)-6-Hydroxy-2-succinylcyclohexa-2,4-diene-1-carboxylate;(1R,6R)-2-Succinyl-6-hydroxy-2,4-cyclohexadiene-1-carboxylate;SHCHC	98870	97958	108770	97314	92712	117900	104980	99311	77252	91147	81580	79136
(5-Formylfuran-3-yl)methyl phosphate;2-Furaldehyde phosphate;4-HFC-P;4-(Hydroxymethyl)-2-furancarboxaldehyde phosphate	1017100	1290100	960390	1222900	1188200	969710	1302300	1265500	308250	241520	288800	268890
(E)-4-Hydroxyphenylacetaldehyde oxime;(E)-[4-Hydroxyphenylacetaldehyde oxime]	9	9	9	9	9	9	9	9	330250	455470	434760	343810
[3-Hexadecanoyloxy-2-(9-oxononanoyloxy)propyl] 2-(trimethylazaniumyl)ethyl phosphate	30372	23893	34380	42088	13939	24487	44544	22546	12986	23167	17003	12126
10-Deacetyl-2-debenzoylbaccatin III	154870	214100	175920	184980	74333	88882	129540	88724	135550	207500	204160	175790
10-Propoxydecanoic acid	21152	25434	21116	24258	23115	23801	50521	27007	87172	75199	64845	77845
12-Ethyl-8-isobutylbacteriochlorophyllide d	9	9	9	9	9	9	9	9	458870	284770	313840	297610
12-trans-Hydroxy juvenile hormone III	8676100	7305800	9416600	9140100	13742000	14754000	14831000	17466000	924100	1021900	1039900	1069100
13-Azaprostanoic acid	12736	17424	14905	12988	9	9	9	9	8582.8	3651.9	9	7535.6
13-Desoxyterpendole I	2633500	1935300	1673600	3014500	2279700	2250600	2502600	4438500	13539	10186	11519	9939
14,15-EE-5(Z)-E	61432	38379	61163	89773	160060	103330	167860	167690	1837.4	1965.3	2026	2613.9
14alpha-Hydroxy-5beta-cholest-7-ene-3,6-dione;Diketol	9	9	9	9	9	9	9	9	76792	60964	80948	72815
15-Demethoxy-epsilon-rhodomycin	20904	15314	16758	28830	448430	454130	405130	548770	14647	25602	21289	30300
15-Oxo-beta-bilirubin	9	9	9	9	9	9	9	9	508830	383080	379750	402600
16-Oxo-palmitate	224950	186640	222490	233520	376880	400220	495380	501350	42405	31118	32891	32228
17,20Hydroxyprogesterone sulfate	17548	18438	16443	21728	17681	15393	20617	16513	18204	14372	14200	21914
17-Hydroxylupanine	257150	261680	285480	294880	164600	243690	216840	269550	17903	12769	7988.2	12769
17-phenyl trinor Prostaglandin F2 cyclopropyl amide	9	9	9	9	9	9	9	9	1199700	920060	1028800	910590
17-trifluoromethylphenyl-13,14-dihydro trinor PGF2	32097	17079	17400	10761	17584	15732	22740	16596	13648	16785	14207	12936
18-Oxooleate	140580	116750	140420	139880	192770	205850	195200	250050	11786	13066	11503	10643
1-Oleoyl Lysophosphatidic Acid(sodium salt)	3555100	2314600	2805900	3221600	7230000	7995200	10233000	10122000	1623900	541970	284990	143520
1-Stearoyl-2-Docosahexaenoyl-sn-Glycero-3-[Phospho-rac-(1-glycerol)]	159250	129250	159560	129500	142340	162300	153310	157130	137650	178270	164790	156680
2,3,4,5-Tetrahydrodipicolinate;delta1-Piperidine-2,6-dicarboxylate;L-2,3,4,5-Tetrahydrodipicolinate;(S)-2,3,4,5-Tetrahydropyridine-2,6-dicarboxylate	14992000	17986000	16967000	20744000	13903000	21183000	21179000	20852000	18132000	17817000	17722000	14160000
2',4,4',6'-Tetrahydroxychalcone 4'-O-glucoside;THC 4'-glucoside;Chalconaringenin 4'-glucoside;2',4,4',6'-Tetrahydroxychalcone 4'-O-beta-D-glucoside	231790	250420	218270	237840	120860	128400	127290	144890	681190	638610	496680	469900
2,5-Dideoxy-2,5-imino-D-mannitol	41568	38297	32303	40502	16571	19378	18036	12627	1973100	2019800	1756800	1802300
2-Amino-5-oxohexanoate	16818000	13727000	14837000	12114000	9047900	9937000	9727200	7378200	12040000	16773000	14362000	15115000
2-Aminoacridone;AMAC	157810	155500	174170	169340	158060	157130	152530	160160	173260	166500	160400	156550
2-Hydroxy-6-oxoocta-2,4,7-trienoate	74096	69649	62067	60213	58274	80145	118610	101770	6820.3	5811.4	4859.8	3466.2
3,5-Dichloro-4-hydroxyphenylpyruvate	154250	170140	172550	168730	180280	192070	175100	192260	155780	160460	155650	119190
3alpha,7alpha-Dihydroxy-12-oxo-5beta-cholanate	9	9	9	9	9	9	9	9	59818	42118	56939	55265
3beta-Cyclopentyl-5alpha-androstan-17beta-ol	950050	1067500	1081600	1154400	1188200	1119600	1171600	1187100	1060700	1107600	1130100	1071700
3-Geranylgeranylindole;3-(Geranylgeranyl)indole	9	9	9	9	9	9	9	9	200630	138250	177500	160310
3-hydroxyandrost-5-en-17-one sulfate	6423200	4899700	5521200	5472900	783940	845850	951490	1109000	7412.2	8617	13931	19752
4,4'-Diapolycopenedial	751300	669860	758500	800080	771170	730300	753650	713880	732510	853910	715630	797200
4,5-seco-Dopa	289700	244860	236730	302810	124410	128140	142290	174650	9848	9315.1	8792.7	7955.3
4-[(1-Oxo-7-phenylheptyl)amino]-(4R)-octanoic acid	2630200	1664700	2453800	3848700	9046500	5367600	8734300	9373300	53514	28216	30751	29744
4-Epiminocycline	6057800	6592300	5451500	6747300	7719700	5479900	8056200	8351200	157100	128610	167400	167440
4-Methylburimamide	9	9	9	9	9	9	9	9	53957	48618	53178	55281
4-O-beta-D-Mannopyranosyl-D-glucopyranose	9	9	9	9	9	9	9	9	169170	150000	191470	206400
5 -CHOLANIC ACID-3 , 12 -DIOL N-(2-SULPHOETHYL)-AMIDE	9	9	9	9	9	9	9	9	140350	130220	130210	141910
5-Amino-6-(1-D-ribitylamino)uracil;5-Amino-6-(D-ribitylamino)uracil;6-(1-D-Ribitylamino)-5-amino-2,4-dihydroxypyrimidine;6-(1-D-Ribitylamino)-5-aminouracil;4-(1-D-Ribitylamino)-5-amino-2,6-dihydroxypyrimidine	781240	741060	842330	892960	874040	719340	835110	789610	38676	27049	42704	44816
5-Hydroxyindolepyruvate	27746	23202	28437	25884	20289	14917	57955	21450	9	9	9	9
6beta-Hydroxy-17beta-estradiol;6beta-Hydroxyestradiol-17beta	84195	56404	75022	87898	117810	77104	112410	125550	9	9	9	9
6Naltrexol	9	9	9	9	9	9	9	9	52835	27865	44120	45310
7-Oxodehydroepiandrosterone 3-acetate	5583700	3729600	4212300	5765300	3603000	4071400	4122300	4364200	68976	58764	64376	78045
8,9-EE-14(Z)-E	8998000	8992100	7703500	9278800	3451800	4243700	4311300	4736700	3640800	2710200	2740100	3655700
9(S)-HEPE	773150	760600	707020	980240	756420	671300	839320	949010	39512	46125	46726	51706
9,10-Dihydroxystearate	25330	21586	24521	26452	36524	33424	29961	41400	191670	129890	163140	124570
9-Riburonosylhypoxanthine	30777	22155	26840	24957	39123	60197	39056	45143	114750	106740	113530	135680
Acetoxy-8-gingerol	9	9	9	9	9	9	9	9	1856700	1511900	2102600	2426400
Aclacinomycin S;L-2-Deoxyfucosyl-L-rhodosaminyl-aklavinone	1049700	742310	736360	774390	812020	930440	990240	423030	179300	204620	180420	255350
Ac-Ser-Asp-Lys-Pro	9	9	9	9	9	9	9	9	771360	603060	627830	771600
Acylated phloroglucinol	9	9	9	9	9	9	9	9	21618	15653	12764	15666
AGC	206450	200810	189940	249430	217050	172320	245360	261290	142780	88641	91227	105770
Agrimophol	5926800	4065500	6612800	7297600	2160700	3153800	5732900	2606600	2290100	2175400	1868700	1993600
Ala Asn Arg Val Thr	322210	509770	283820	469230	848160	644310	860330	791990	9	9	9	9
Ala Asn Ile Lys	565590	651450	1395900	1336400	4135400	1227000	12455000	2977100	373410	341390	425210	551960
Ala Asn Lys Glu Asn	3471800	3675400	3117100	4512800	4023300	2815100	4321600	4411800	97050	78736	118540	150970
Ala Asp Phe Asp	934480	1196600	1101900	1235500	1319700	702270	1354400	1254100	91681	103530	100810	128630
Ala Asp Ser Glu	9	9	9	9	9	9	9	9	358700	270990	215890	235910
Ala Glu Gln	9	9	9	9	9	9	9	9	1011900	1096900	1445700	1047400
Ala Glu Val Asp	9	9	9	9	9	9	9	9	62936	56777	65521	60929
Ala Gly Leu Val Ser	376670	508940	401510	518260	371230	568430	660150	634320	9	9	21792	30932
Ala His Tyr Glu	1447100	1886600	1480500	2000100	1808800	1213500	2139400	1972300	86034	41125	44743	71779
Ala Pro Ala	170720	218670	184620	183680	180810	202490	192660	218650	166820	172280	137790	133290
Ala Pro Met	13329000	18083000	17136000	14836000	17967000	11872000	17861000	16535000	616860	571500	691290	733150
Ala Thr Ile Lys	1474800	1515200	1581800	1482600	1726400	1633700	2157500	1943200	1098000	1141400	1172100	842640
Ala Thr Val Glu	9	9	9	9	9	9	9	9	1952600	2486400	2512700	2860500
Ala Val Ala Ile Gln	159300	149760	183730	137490	202020	253250	223610	187770	186480	179040	154340	123090
Ala Val Asp Asp	17677	16158	13949	21685	18969	18231	14948	20384	9	9	9	9
Ala Val Glu	48223	19567	38041	14903	35467	19945	29395	53410	5538400	3958200	4900200	4946500
Ala Val Leu Glu	9	9	9	9	9	9	9	9	490760	409550	359060	445960
Ala-Trp	985190	961040	918610	1168000	1037300	860910	1078000	1192300	21741	16381	20174	20700
alpha-Tocopherol acetate;Tocopherol acetate	9	9	9	9	9	9	9	9	41314	34054	35879	43705
AM-Toxin I	2006300	1776800	1605600	2259100	5132100	4505200	5126400	6193700	365370	291200	317220	398210
Anhydrorhodovibrin	1543500	1312500	1298200	1509600	1388600	1433600	1550600	1531700	1741200	1549300	1720700	2081900
Ankorine	2850200	1993500	2491400	3067100	3893600	2721900	4101900	4537100	21271	10343	15115	12782
Arg Asn Gln Glu	368460	413100	364370	479700	429830	302930	453720	527790	6206.8	4727	4357.7	8467.3
Arg Asn Gly	388000	383970	451840	337760	366590	318130	334710	375170	446980	391490	364310	489110
Arg Gln Asn	51775	44612	41216	21436	9	9	9	9	368530	386870	460260	441970
Arg Glu Trp	125750	122390	115330	132140	453420	419920	602740	562040	164680	122190	106410	172900
Arg Gly Leu	9	9	9	9	13327	31954	10343	17998	1151800	1104100	979480	650600
Arg Ile Ala Glu Glu	13532000	16291000	12061000	15762000	16802000	10165000	16238000	17669000	226580	215630	274530	309310
Arg Ile Asp Asp	4099800	4603500	4306600	4660700	4586100	3209900	4997000	4993200	96752	76234	108440	104620
Arg Leu Leu Asn Asn	2375000	2454300	2154200	3002200	2386700	1992600	2884600	2788400	69582	33577	54425	67119
Arg Lys His Arg	26494	28719	14686	21806	19023	13528	33033	33001	9	9	9	9
Arg Met Met	2251800	1804300	2753200	2850000	556940	781700	1243600	675540	1289300	1245400	1236500	1417200
Arg Phe Asn Ala His	9	9	9	9	9	9	9	9	1405800	1199100	1490300	1703500
Arg Pro Asp	126270	62915	130050	185470	15343	15339	532590	37652	9521.4	9894.5	13010	8198
Arg Ser Ser	268280	224520	228090	296480	285220	169390	297010	230570	9	5126.6	9	9
Arg Ser Tyr	5670800	5376300	5352800	5554500	5213700	5164000	4962200	3610500	5254300	5190500	5421300	4995000
Arg Thr Ala Arg	840940	908880	891320	976950	1272100	925160	1323800	1312700	816410	1076200	828350	863440
Arg Tyr Thr Glu	9	9	9	9	9	9	9	9	399350	237310	467420	455980
Arg Val Ser Leu Asp	6607100	7310200	5705800	8466300	6502900	5629400	8649900	8684600	193780	199400	152770	182770
Asn Ala Leu Ala His	168530	174500	159270	192560	196130	156640	224220	236740	9	9	9	9
Asn Arg Glu Ser Leu	284940	362430	226530	390780	490110	227440	550050	456400	21718	12335	28839	21069
Asn Arg Gly	20549	39410	30712	37255	22337	32009	35369	28617	34318	36079	37241	44599
Asn Arg Phe Lys	540650	440410	386420	444710	868030	961040	1157700	1182400	28696	14691	23413	17867
Asn Asp Leu Asp	9	9	9	9	9	9	9	9	144610	131370	165910	148600
Asn Gln Ser	1541500	1209700	1656900	2109900	2246300	2027700	2081500	2295600	9541.4	5091.4	5613.8	8625.3
Asn Gln Val Lys	9135600	6266000	6963600	6432700	4700600	6112300	4223900	7154900	87894	118890	145470	174420
Asn His Val Asp	201480	176040	164860	227060	384960	364130	451280	417060	132270	88451	86384	140750
Asn Ile Lys Asp	18644000	17784000	17998000	15871000	10288000	11806000	11018000	14712000	100490	89137	82984	94002
Asn Leu Lys Asp	981010	787610	854510	904680	643660	742020	491370	748480	6229.5	5841.7	3909.2	5891.1
Asn Lys Ala Val Gly	8750300	10737000	8729800	14054000	13684000	7333800	13330000	11525000	376580	348330	513360	447010
Asn Lys Phe Asp	136940	181330	148390	143850	240330	93360	191220	164560	22761	43962	36425	58638
Asn Phe Ser Arg	1415900	1623400	1104100	1197200	1072100	1046400	1458800	1434100	40306	50347	51660	88689
Asn Ser Leu Arg	5410.5	9	4826.3	4177.8	9	9	9	9	1133500	881910	856070	828930
Asn Thr Gln Glu	104190	120060	100630	107770	120300	90835	138940	155690	9	9	9	9
Asn Val Phe Lys	2220300	2018900	2005600	2312900	2241200	1847700	1957200	2081800	2083200	1860700	2088400	2053100
Asn-Asp-OH	764410	761630	631850	547550	372080	331710	407300	366030	192770	164970	157570	137790
Asn-Leu	9	9	9	9	9	9	9	9	209370	200630	189100	229070
Asp Ala Leu Arg Thr	1002800	987670	996830	762580	573270	553180	434440	748060	9	9	9	9
Asp Ala Thr Glu	7982700	7985900	8025100	9838000	9996700	10857000	11712000	12537000	9	9	9	9
Asp Asn Ile	2682000	2450600	3248500	2804100	3674400	3238600	3029500	3525400	735320	683600	643360	628680
Asp Gln Val Leu Ser	13149000	15496000	14602000	17595000	18682000	14417000	21482000	18912000	45928	9	29768	49114
Asp Glu Leu	9	9	9	9	9	9	9	9	1097300	1336200	1233600	1198400
Asp Ile Thr	44328	56613	62113	56610	109510	112660	118090	123730	6620600	6334100	8312300	7039500
Asp Leu Ala Glu	9	9	9	9	9	9	9	9	45201	50429	42296	52192
Asp Leu Lys Asp	8622600	7351500	7348500	9562600	8617800	9228900	9364400	11045000	47823	14232	24696	26896
Asp Leu Phe Arg	117810	98263	56863	116810	69048	49434	56088	88327	34417	17247	19735	28576
Asp Leu Ser	92122	85508	100530	68005	184660	116560	208130	213950	6446900	5785800	6795300	6705400
Asp Met Leu Asp Leu	9	9	9	9	20318000	20932000	21199000	25933000	2042300	2321600	1641400	2742500
Asp Phe Ser Arg	613990	728100	558450	537020	646820	591000	587010	560050	611360	529880	539230	616010
Asp Pro Gly	99208	131630	129380	131600	262640	65259	236540	112440	1954000	1048600	2102800	1471000
Asp Pro Thr Ile Glu	1841800	2061900	1487900	2047100	2596500	1712400	2505500	2340300	46523	55633	52175	44075
Asp Val Ala	9	9	9	9	9	9	9	9	15155000	13305000	20070000	13823000
Asp-Lys	5821400	6078600	4432200	5554000	1273800	1507600	1338900	1688300	1689200	744730	873220	1048600
Avermectin A1b;Avermectin A1a, 25-de(1-methylpropyl)-25-(1-methylethyl)-	8504.7	4446.2	4627.6	14849	38191	30435	43123	58196	9	9	1867	2569
Azomycin;2-Nitroimidazole	9	9	9	9	9	9	9	9	1304000	3156000	3915700	4558900
beta-D-Mannosyl-1,4-N-acetyl-D-glucosamine;4-O-beta-D-Mannopyranosyl-N-acetyl-D-glucosamine	9	9	9	9	9	9	9	9	43394	39347	96854	161390
beta-Paxitriol;10beta-Hydroxypaxilline	916760	538470	460490	894330	819540	594010	1023800	1451400	9	9	9	9
Boc-Pro-Phe(NMe)-Gly-OMe	85532	57961	49311	106910	264450	238390	324390	419330	23945	16910	17306	34207
Chymostatin	367920	425500	352450	449860	422470	307180	507100	491710	9	9	13721	7735.6
Cinncassiol C2	5764200	6376900	5682500	6013300	6118600	4648700	6685100	6084100	939010	526350	672340	601950
Clavamycin D	9	9	9	9	9	9	9	9	703430	553870	615270	593850
CMP-8-amino-3,8-dideoxy-beta-D-manno-octulosonate;CMP-Kdo8N	9	9	9	9	9	9	9	9	432080	183400	430180	267820
Crocin II	318760	283330	237950	314680	296120	257640	341730	325690	9065.2	5114.2	5458.1	6636.3
Cucurbic acid	28222	33859	30553	25117	32131	26801	32261	33988	40234	34111	29419	31198
Cyclooctat-9-en-7-ol;(1S,3aS,4R,7S,9aS,10aS)-1,4,9a-Trimethyl-7-(propan-2-yl)-1,2,3,3a,4,5,7,8,9,9a,10,10a-dodecahydrodicyclopenta[a,d][8]annulen-4-ol	9	9	9	9	9	9	9	9	66860	40006	54647	57398
D-beta-Phenylalanine;(S)-3-Amino-3-phenylpropanoate	244150	185000	209090	258140	241690	227220	258930	290340	9	9	9	9
Decylubiquinone;6-Decylubiquinone;2,3-Dimethoxy-5-methyl-6-decyl-1,4-benzoquinone	9752900	7668200	7984300	9449700	7745500	9493900	8897200	10194000	200590	162990	188250	146210
Demethylphylloquinol	11286000	8872100	8696900	10794000	11172000	9963400	13142000	14007000	45077	11587	17484	20069
D-Erythrulose 1-phosphate	1435000	1461200	1498600	1365700	1202500	1297900	1209500	1160100	1915400	2191700	1924100	2081600
Desmethyl-betahistine(2-(2-aminoethyl)pyridine)	2619800	3007000	2905500	2793400	2871800	3379900	3032500	3162800	3219900	3494600	3602000	3381400
D-Glucosaminate-6-phosphate;2-Amino-2-deoxy-D-gluconate 6-phosphate	406660	415820	483410	501230	465430	422140	512320	525070	51618	54855	85478	67241
Diacetyl-10-gingerdiol	4922800	4630400	5258300	4627700	5229800	3882300	4099200	4584200	4358000	5112200	4969600	4045600
Diacetyl-8-gingerdiol	1070200	1197800	1177800	973390	879020	948470	742450	738750	1244400	1509700	1632200	1474700
DIHYDRO- -TUBAIC ACID	23152000	23204000	23734000	24622000	24791000	25046000	25358000	26976000	28013000	27578000	25987000	25344000
Dihydromethanophenazine;2-(Dihydropentaprenyloxy)-dihydrophenazine	264110	319570	312350	252450	272570	333720	334170	390350	235450	172480	219500	188510
Diprenorphine	272230	174480	154440	330150	964610	903840	1002000	1462700	52670	37203	40490	82646
Diprotin B	2933600	2678500	2922100	2863700	4407500	3103700	4351600	4139100	15012	9	9	9
di-trans,poly-cis-Undecaprenyl phosphate;Undecaprenyl phosphate;ditrans,octacis-Undecaprenyl phosphate	2797300	2187200	2149500	3036200	6523800	5697900	7290500	8303800	11801	5529.2	3244.6	5466.5
Endomorphin-1	470250	438830	455610	520560	527260	380820	524990	562660	18819	10603	18796	20107
Enterostatin human	11306000	13927000	9419700	10938000	13647000	8196200	15288000	13380000	352110	315000	526780	468300
Estramustine phosphate sodium	9	9	9	9	9	9	9	9	45775	44008	38164	49151
Etorphine	3730000	3408200	3199600	4705800	8097400	6628400	8202800	8885300	468680	340580	415230	505300
Fructoselysine	5478.4	6056	9550.4	7278.5	27418	18740	97034	28923	18405	29091	23394	41053
Fruticosonine	1299700	964970	1318300	1612600	3635000	2447400	3363200	3303000	26021	17265	22726	14827
Gal1-3Gal1-4GlcSp	384130	366120	384350	427500	416350	354260	421490	450750	9	9	9	9
gamma-L-Glutamyl-L-cysteinyl-beta-alanine	9	9	9	9	9	9	9	9	3768900	1679800	2261700	1826300
Ganoderic acid H	86293	72056	77499	95211	89613	80206	90680	101930	1213800	663880	821270	848300
GlcNAc1-3Gal1-4GlcNAcSp	9	9	9	9	9	9	9	9	53807	30009	36498	36580
Gln Ala Gln Ile Glu	2509900	2369200	2012700	2263000	2619900	1697700	3325300	3635300	84670	102140	78911	210930
Gln Gln Gln Glu Gln	233070	141620	150420	113710	207970	228120	301700	235170	192790	165430	195750	208610
Gln Glu Leu Glu	153950	179470	146960	192730	183700	137200	220600	247090	6399.8	6073.6	6252.1	7391.6
Gln His Phe Arg	9	9	9	9	9	9	9	9	473990	480650	452050	574190
Gln Ser Tyr Phe Val	115060	177550	152110	162130	161800	118440	176370	156190	9	9	9	9
Gln Trp Trp	22100000	26599000	21838000	24577000	24446000	17828000	27192000	20730000	686450	428320	543770	717160
Gln-Gln	4194800	3626500	4057900	3889300	4149200	3728000	5040200	4493700	74007	86234	100790	88521
Glu Ala Asn Lys Glu	9	9	9	9	9	9	9	9	9	9	9	9
Glu Arg Asp	3302700	3380600	2696100	3409400	2657200	2656900	3245000	3366800	190070	149450	224450	240470
Glu Arg Leu	1833700	1486000	1801700	2046500	1263200	1586000	1494700	1375900	862450	590280	501990	802320
Glu Asn Gln Glu	22786000	20443000	20977000	23977000	16880000	20503000	20579000	16899000	11026000	11804000	10733000	14408000
Glu Asn Val Glu	121340	121960	113600	9	113100	96709	136050	137340	11937	15749	7186	10793
Glu Gln Lys Asp Arg	176130	219470	165470	242350	234330	129950	204530	233970	9	9	9	9
Glu Gln Phe Arg	19158000	11887000	13589000	18941000	3496700	3597500	4228000	5089800	74526	36078	41348	53969
Glu Glu Met Ile Ala	16136000	14545000	13126000	12190000	6090800	10060000	7253200	7549900	9879300	7884000	8950600	11310000
Glu Gly Val Tyr Ala	9	9	9	9	9	9	9	9	1038400	893910	1086900	806060
Glu Ile Ala His Gly	14991000	19226000	20660000	21693000	19323000	12686000	23274000	23236000	9	9	9	9
Glu Ile Glu	9	9	9	9	9	9	9	9	647070	399750	517490	492960
Glu Leu Gly Lys Gln	1867700	2164900	1692500	2174000	2527100	1827900	2601200	2433300	65465	46295	50423	59335
Glu Lys Leu Thr His	2060700	2750400	2008400	2941900	4115900	2634800	3570400	3142000	44960	56162	52261	71177
Glu Lys Tyr Ser Asn	9	9	9	9	9	9	9	9	3769300	3027200	3663500	4276800
Glu Met Leu Val Ala	24701000	29106000	21702000	29657000	26991000	23916000	36906000	33263000	576280	390700	473540	652460
Glu Phe Leu Lys	12413000	10671000	12071000	10108000	6273100	7934100	4260800	7553800	22468	38793	19837	37503
Glu Ser Thr Lys	1736700	1573200	1410800	2058800	1460100	1378400	1599700	1854200	9	9	9	9
Glu Thr Phe Arg	6494600	6153300	6018900	7073200	6507800	5044000	6666100	5940500	98224	79911	92017	88651
Glu Thr Tyr Glu	142250	154000	120870	155090	138660	107400	152730	153140	9	9	9	9
Glu Tyr Ala Asp	391010	431980	360060	410750	523490	440660	486920	490880	20146	14629	16394	19878
Glu Tyr Asn Lys	9	9	9	4077.8	9	9	9	9	717630	512640	446130	686950
Glu Tyr Ile Glu	153440	156210	192640	187630	128060	139080	160620	129010	113820	164870	155320	139650
Glu Val Gln Glu	549120	589590	570470	653590	615810	537440	635820	774410	86831	60351	67908	67309
Glu-Ile	1502900	1596000	1441400	1475600	1878500	1138900	1693900	1933300	63888	40202	66127	85147
Gly Ala Asn Val Arg	1105800	1467000	1080000	1284500	2066500	1210900	2704800	2214400	11230	34201	39109	32928
Gly Arg Ala	9	9	9	9	9	9	9	9	131030	182040	178570	139870
Gly Asp Ala Asn Thr	1703600	1833800	2041000	1998600	2108600	1666400	2237100	1941900	1071400	864770	924340	1293500
Gly Glu Tyr Ser Val	6367000	6404100	4796700	6199600	7136100	4900700	6956700	6766600	268780	192770	321470	246690
Gly Gly Asn Glu Glu	5492400	6254300	5683300	5878500	5316200	5489200	5850500	6850700	480690	767700	355770	718010
Gly Gly Gln	5401900	4297500	4865000	5758700	4579800	4185500	4902000	5323700	7023.5	7746	10142	14382
Gly Gly Thr	9	9	9	9	9	9	9	9	4656400	6201600	7925200	4860300
Gly Leu Arg Asn Gln	6021400	6508200	5864400	7428000	6928300	4560400	7191600	6503800	140880	133720	152550	138450
Gly Leu Arg Val Phe	323750	403490	383980	343420	353980	288860	452380	412920	291540	574250	401340	374130
Gly Leu Asp Val Trp	1376000	1444500	1326600	1509200	1438600	1362600	1395300	1688900	1339100	1348400	1260000	1520600
Gly Leu Glu	2225000	2251800	2500500	2330500	2686300	2223800	3232500	2889700	6219200	3280600	5601900	3546600
Gly Lys Phe	4940500	4815600	3864000	6188600	4800600	4126700	5453100	5216400	267900	276510	323680	308680
Gly Pro Arg	9	9	9	9	9	9	9	9	2048700	1961100	2104100	3009500
Gly Pro Gly	9	9	9	9	9	9	9	9	581570	632220	697090	582960
Gly Pro Val	33510000	34998000	36519000	31724000	33800000	27395000	39512000	41060000	96712	173720	187930	290320
Gly Val Leu	9	9	9	9	9	9	9	9	385640	337200	418820	410740
Helveticoside;Strophanthidin 3-O-beta-D-digitoxoside	9	9	9	9	9	9	9	9	190080	111780	119760	112460
Hemibrevetoxin B	72801	66891	70639	81493	79897	64056	92391	103750	1177600	660360	830120	802920
His Ala Arg Glu	982250	1082100	861820	1116900	1192900	810320	1181600	1075400	64701	38742	67215	51297
His Ala Gln Lys	1098600	1000700	950530	1168800	3764200	2692400	4016400	3736500	224120	191250	221710	199670
His Ala Val Asp	9	9	9	9	9	9	9	9	1232200	985900	1690700	1583900
His Arg Phe	1536300	1276600	1910300	2624300	4153600	4052000	4903200	5712600	9	9	9	9
His Asn Ile Asp	318650	266970	237620	337140	379360	393990	455600	450150	16398	9868.6	11872	15342
His Asn Phe Lys	3362800	3555600	3192700	3240100	3528700	2626100	4049200	4105100	235320	175290	247400	187000
His Asn Thr	9	9	9	9	9	9	9	9	22695	34263	31948	47509
His Asp Tyr Lys	1045200	1124300	970560	1227800	1164700	958910	1265400	1394600	69940	61125	51766	65397
His Gln Val	3290700	3006400	2804800	2730100	3000900	3254600	3145400	3485300	3343100	3324200	3067700	3392900
His Glu Phe Glu	9	9	9	9	9	9	9	9	50892	51565	77006	67831
His His Ser Lys His	10509000	12490000	10628000	11388000	10339000	8333500	13127000	13447000	248570	159330	221490	226470
His Leu Met	1133400	1234300	994640	732920	957320	957090	1217700	1358800	46831	25514	26298	74825
His Lys Ile Asp	1342700	1457600	1272600	1522700	1904800	1285900	2059800	1940000	79600	68706	87305	86581
His Phe Arg Asp	137060	135820	132900	154190	119220	107750	130990	180970	9	9	9	9
His Pro Ile	606470	910590	757580	663850	3074700	1184000	5727600	3529600	849250	929350	905730	866840
His Thr Lys Lys	9	9	9	9	9	9	9	9	84217	38608	56401	50692
His Tyr Ile Asp	614150	818600	690890	931710	662540	580540	694480	646570	43456	63714	59111	71594
His Val Arg Asp	5501900	4276900	4104100	5686800	4922600	4585000	4963800	6434200	9	9	9	9
His-Nap-OH	263250	219550	183110	234720	206330	208080	216650	207600	220220	207330	273740	232750
Homocapsaicin;Homocapsaicin I	6128100	3867300	6173500	6725000	14611000	9839700	14000000	15716000	102240	47701	52260	46128
Ile Arg Asn Asp	110210	110020	118760	108940	128570	131210	151370	156610	119140	124280	119730	111760
Ile Asp Glu	9	9	9	9	9	9	9	9	1788900	1757600	1850700	2430900
Ile Gln Asn Glu	279760	306710	263740	314830	312100	255030	332810	425340	9	9	9	9
Ile Glu Glu	1622100	2159800	1582500	1900700	2579200	1914700	3282400	2828700	9	9	9	9
Ile Glu His Lys	160970	183200	158600	209090	152780	149030	170670	184250	9	9	9	9
Ile Gly Val	5338800	13533000	6907300	9760700	25669000	13312000	45751000	28748000	9	9	9	9
Ile His Asn Glu	656960	624980	565360	582800	728760	741580	681940	730760	135500	93080	79445	103580
Ile Leu Ala Asp	9	9	9	9	9	9	9	9	1637600	1280900	1530100	1287000
Ile Phe Gln Glu	195890	195030	195780	200470	238360	195380	208610	234460	11942	7094.2	11488	12629
Ile Phe Val Lys	484670	717360	524520	685850	1032100	508400	1570000	1114700	52898	56962	50824	69725
Ile Thr His Asp	11515000	7837200	8171800	11723000	8481600	8850200	11393000	11605000	91703	41242	43474	60907
Ile Thr Tyr Asp	509500	479130	399620	599490	1132400	891860	1257500	1413200	481950	219620	207150	342830
Ile Val Leu Glu	2198800	2581700	2499400	3117300	2630200	3514000	3159300	2906200	3058700	2659400	3153200	3351100
Ile-HoPhe-OH	9	9	9	9	9	9	9	9	46769	47779	41629	47108
Indole-3-acetaldehyde oxime;Indole-3-acetaldoxime;3-Indoleacetaldoxime;(E)-Indol-3-ylacetaldoxime	160620	117590	150190	178470	247750	218260	243500	311610	6187.7	5115.4	4082	4667.8
Isoandrocymbine	9	9	9	9	9	9	9	9	24948	25363	14174	12019
Juvenile hormone II acid;(2E,6E)-(10R,11S)-10,11-Epoxy-3,7,11-trimethyltrideca-2,6-dienoic acid;(2E,6E)-(10R,11S)-10,11-Epoxy-3,7,11-trimethyltrideca-2,6-dienoate;(2E,6E)-10,11-Epoxy-3,7,11-trimethyltridecadienoic acid	9254700	9574500	8816300	9770200	6440600	7392100	6946800	7583800	94492	76174	55622	48628
Juvenile hormone II;Methyl(2E,6E)-(10R,11S)-10,11-epoxy-3,7,11-trimethyltrideca-2,6-dienoate	234710	208290	244250	249910	188520	136120	184810	162530	11897	10044	9	9
JWH 018 N-pentanoic acid metabolite	9	9	9	9	9	9	407.54	9	110750	116620	110700	107210
JWH 210 N-(5-carboxypentyl) metabolite	24893	38639	37246	14980	32563	44193	42425	38651	8292.9	15577	28644	24213
JWH022	5261600	4278500	4400600	5385100	6098100	5538000	5871200	7200600	49445	35217	45464	39475
Kalkitoxin thioamide alcohol	2185600	2510700	2483500	2499300	2491500	2150300	2633700	2005400	2676000	2349500	2633800	2472100
Kikkanol A	133780	138130	154980	138550	156970	146340	155470	147730	166120	195520	148850	149990
L-a-Lysophosphatidylserine	8413000	8620000	9314100	9605000	9040600	8401000	8219700	8347900	8763700	7827000	7765600	8656300
L-beta-Phenylalanine;(R)-3-Amino-3-phenylpropanoate	9048300	8919200	8742200	9834000	8919700	8446300	9117900	9722900	3713700	3486800	3412600	3306700
Leu Ala Arg Glu	1144400	1131700	1087900	1200700	481130	472370	503160	538590	475340	334040	326470	493780
Leu Ala Glu	553890	654590	589880	783330	800360	580170	844440	735690	60334	46376	63283	52489
Leu Ala Gly Glu Phe	9	9	9	9	9	9	9	9	2667100	2203800	2335400	2388000
Leu Arg Gly Gln Asp	1009500	1051200	925200	1113500	1097300	791780	1206900	1214200	31237	23564	24260	25148
Leu Gln Lys Ser Leu	442270	448680	453200	508240	478250	371020	535030	553800	9	9	9	9
Leu Glu Ile Glu	247010	257270	228050	284090	275150	208070	367090	342700	10440	6518.8	8211.3	11713
Leu Glu Lys Glu	1020500	975250	857840	1131400	1324100	1143700	1458100	1614600	63549	47404	59525	82238
Leu Glu Phe Glu	618770	472770	435400	611800	5247000	5489900	6597800	7195800	252430	180310	133360	235460
Leu Gly His Phe Met	57230000	56572000	60247000	60056000	65590000	47356000	67470000	66999000	1901100	1554300	2118700	2121900
Leu Gly Val	424330	101960	223110	266910	19450	59989	156990	23804	19302	26593	16855	25893
Leu His Phe	8100.4	9	9	9	10035	9350.7	9	9	9467200	8450300	17518000	12493000
Leu Ile Glu	546870	553620	509270	626680	593740	413260	637730	678570	11079	14875	12388	24421
Leu Ile Glu Glu	9	9	9	9	9	9	9	9	40301	31422	32976	34241
Leu Ile Tyr	2592700	3371600	2360500	3027100	6372900	3673900	8412600	7535700	53186	43635	55119	50209
Leu Leu Ser Pro Tyr	2319500	2759000	1817500	2029700	3704700	2200200	4229200	3691700	47809	46011	40931	44800
Leu Pro Gln	67254	51192	26501	51176	79782	37869	78976	59992	7964.5	11944	9139.5	13445
Leu Pro Thr	3516400	4286500	3410600	3866900	5206000	3346900	5799500	5782000	93708	90929	116320	143570
Leu Ser Gln Pro Lys	221620	126000	175920	218960	9	9	9	9	81683	108340	90567	83539
Leu Ser Leu Pro Glu	204220	223770	180820	214730	191330	162150	235500	232500	9	9	9	9
Leu Ser Phe Gln Asp	9	9	9	9	9	9	9	9	2959400	2821500	3159900	3584600
Leu Ser Ser	1079200	1073500	923500	1192000	1242200	838770	1261700	1261700	28130	21132	28797	18538
Leu Tyr Asp Lys	9	9	9	9	9	9	9	9	350070	406620	538680	536320
Leu Tyr Val Lys	38668	30189	34264	52417	202180	145190	253350	264270	133730	150400	113110	111270
Leu Val Val Val Asp	1823500	1178300	1120400	2109700	4142000	3345800	4995300	4212000	54549	31444	19780	23415
Leu-Gln	4293100	5758800	4603700	6163200	6244500	3558400	6400900	6119300	183510	199990	231030	220570
Leu-Glu	2699600	3044200	2509500	3578600	5019000	3400500	5148200	5347500	45213	33850	35561	29941
L-Histidinol phosphate	17122	17221	16401	12064	21091	47756	49798	21967	790540	641830	623980	777600
Lobelanine	174550	122410	161290	130850	202290	227080	258550	333130	29110	46231	36407	19350
Lolitrem K	2722800	2951700	3009100	2628300	3283100	3813300	3106000	2965100	4602000	5924800	5524700	5112900
Lys Arg Leu Glu	1416100	1368800	1458600	1408300	1403900	1564900	1511100	1579200	1689300	1600100	1726800	1661600
Lys Asn Thr	6370700	6252800	4921800	5196100	6004500	5375900	6430600	5395800	5558300	5160800	6529800	6354700
Lys Asp Leu Glu	9	9	9	9	9	9	9	9	27295	19220	20092	26802
Lys Asp Thr Lys	38485000	72405000	33704000	75307000	119770000	56802000	150140000	108960000	2768900	1757300	3148900	3421300
Lys Gln Phe Glu	9	9	9	9	9	9	9	9	94816	42465	64353	65103
Lys Gln Ser Glu	15892000	19199000	13461000	25123000	45213000	18580000	47939000	34676000	66241	23118	67225	88041
Lys Gly Gly Asn Glu	3150400	4010500	2983000	4051800	4093700	3102100	4990400	4664700	123730	90868	143550	128190
Lys His Ile Glu Glu	9	9	9	9	9	9	9	9	714500	424900	535490	553450
Lys His Met	1566700	945570	1480200	1756400	227400	478640	883180	232550	251250	216220	174900	229140
Lys Leu Ala Glu	888170	592090	1001400	1031700	394140	301140	831420	316220	200730	217790	213930	257160
Lys Leu Asn His Gln	9	9	9	9	9	9	9	9	365250	296160	458440	456640
Lys Leu His Glu	134900	55654	62153	103190	47174	50163	159150	177980	37810	15062	11887	16741
Lys Met His	1493300	927370	1946500	2085500	335470	655100	1175500	458570	687410	494610	340770	434100
Lys Phe Glu	7337200	7297000	6932400	8350000	6784600	6220300	7477900	7434000	257330	239430	298800	341180
Lys Phe Leu Glu	888820	880800	860510	954080	1090200	815670	1102400	1099600	29888	22690	38213	38931
Lys Phe Thr Asp	7076800	7145900	6888000	6491200	4361000	5553200	3415200	3797200	5296200	4468800	4725200	5812300
Lys Ser Asp Glu Met	4847000	4626100	4454800	4322700	3678500	2720800	3421100	3729400	296580	186260	214570	290900
Lys Ser Phe Glu	199540	175130	201400	198520	216620	153650	266500	219950	25871	13499	17630	26733
Lys Thr Glu Lys	12238000	25853000	11851000	25365000	56529000	17592000	81364000	48580000	1522400	1289300	1602500	2178800
Lys Thr Glu Lys Ala	2291000	2236900	2880600	2986000	1989800	2080200	1994200	1892500	1515000	2558500	2599500	2414300
Lys Thr Phe Glu	1771500	2163600	2018600	208500	7465600	7325100	7506100	9508100	908950	911570	659280	1214700
Lys Thr Tyr	348970	413590	295340	392640	408010	244820	426930	349760	9	9	9	9
Lys Tyr Thr Ser Ser	9	9	9	9	9	9	9	9	2934600	1932000	2442500	2808900
Lys Tyr Val Met Leu	889530	1409700	1335700	956390	1064100	829000	1176000	1769100	48160	42557	51127	53556
Lys-Abu-OH	194820	216190	162350	194880	187030	156060	217670	218750	128110	115720	108620	118380
Lys-Lys-OH	37769	39962	39130	45735	46271	38502	41694	48347	471800	391490	408040	483720
Lys-Thr-OH	9	9	3929.4	9	9	9	9	9	53924	39880	42537	43351
Magnoshinin	261780	100770	298880	343420	59439	41529	185790	59406	11620	13027	16442	15760
Malonamoyl-CoA	1235600	1212000	1015100	1965200	626420	587550	972400	1019800	9	9	9	9
Maltohexaose	9	9	9	9	9	9	9	9	100540	80509	183220	97405
Mannobiose;beta-1,4-Mannobiose	48293	38382	47258	62750	69332	50415	69859	83865	401840	384550	634960	507120
Mesoporphyrin IX	96004	80787	62966	80434	155410	191670	234100	241790	9	9	9	9
Met Asp Gly	937550	915490	936820	974810	954650	837520	1013700	948140	776500	730550	771400	707560
Met Lys Asn His Leu	24755000	33751000	21152000	33212000	22926000	16460000	36939000	24924000	470720	515680	557380	672700
Met Lys His	12199000	5870000	15201000	14903000	3807500	3556500	15986000	4092600	2470600	2452800	2566500	2292300
Met Lys Phe	15614000	15492000	18687000	18124000	19939000	12635000	17892000	18556000	217380	229010	243890	296680
Met Met Phe	5618200	4979700	6490400	6400100	7184000	6662500	7767600	5470700	248720	216390	265450	310430
Met Pro Leu	110060000	106990000	114690000	113900000	68462000	71846000	66438000	68594000	429410	497850	499710	559980
Met Ser Phe Thr Phe	160550	127420	133830	149290	133790	133720	137970	131540	152080	129520	162100	143080
Mirasan	284410	281250	275900	270200	257710	302230	313150	296240	282280	303980	250900	276750
N(6)-[(Indol-3-yl)acetyl]-L-lysine;N6-[(Indol-3-yl)acetyl]-L-lysine	940960	881800	907310	993400	1109300	881520	1139000	1347400	15112	13953	17198	21190
N-[1-[4-(5-Chloro-2-oxo-3H-benzimidazol-1-yl)piperidin-1-yl]propan-2-yl]naphthalene-2-carboxamide;hydrochloride	640280	485650	724360	819440	1031300	944750	790660	1142500	9	9	9	9
N17-Dimethylindole-3-carboxaldehyde	1544400	1585600	1763600	1579700	1522800	1666400	1704300	1621700	1683900	1659700	1583500	1269700
Nap-Ala-OH	15712	26128	26371	34788	41977	22273	18374	12559	1069900	1051500	941910	996050
Nap-Lys-OH	212310	263980	231060	250450	312610	242790	277390	346610	9	9	9	9
Nap-Tyr-OH	167700	149450	142540	160010	125170	140170	135490	152170	164750	184510	123430	174980
N-methylundec-10-enamide	34568	24950	45361	24494	33814	21016	26511	30039	25285	18899	22925	18478
Nomilin	65253	47882	51300	68572	122120	105710	154280	161990	9332.2	6189.3	4491.5	6801.7
Norbelladine	9	9	9	9	9	9	9	9	106170	72387	78200	84384
Obacunone	808370	507980	955360	1062900	180130	257670	439520	298940	217290	252760	231150	193140
o-Hydroxylaminobenzoate;2-Hydroxylaminobenzoic acid	9	9	9	9	9	9	9	9	12914	25883	23594	27982
Oleic Acid-biotin	1566000	1595900	1678000	1504500	1894500	2018000	1947600	1898700	2225400	2436900	2245700	2041800
omega-Hydroxyphylloquinone	9	9	9	9	9	9	9	9	58617	38460	38263	29488
Pantetheine 4'-phosphate;4'-Phosphopantetheine;Phosphopantetheine;D-Pantetheine 4'-phosphate	9	9	9	9	9	9	9	9	614440	578720	495520	586000
Penitrem F	480910	474430	433600	446960	689940	860450	720300	726410	235320	199680	209310	313320
Perazine	1587700	1121600	1491900	2081700	1028600	573250	1355500	1157900	7883.5	2984.3	3118.5	2016.1
Phaseolic acid	24101	33131	16462	12405	9	9	9	9	258820	344660	231760	330160
Phe Ala Arg Asp	3108800	3029100	2850300	3539000	3687100	2551100	3929600	4068200	10411	6033	2205.1	9202.4
Phe Arg Ala Asp	35327000	35809000	29836000	41142000	40750000	29324000	40745000	42962000	80164	28367	59706	124140
Phe Arg Asp	49893	16275	59266	61886	343860	204890	22010	241820	11672	10507	12296	12682
Phe Arg Thr Glu	179910	201840	164570	223170	21013	23848	17241	28794	126370	100270	99548	151200
Phe Asn Ile Glu	9	9	9	9	122.31	9	9	9	87328	65125	63498	78609
Phe Gln Thr	333750	325830	278750	348820	355290	234310	425670	340030	8793.9	9	10993	7446.3
Phe Glu Asp	131560	62200	76544	72338	60883	59155	46550	120470	1630400	681080	1340700	988680
Phe Glu Ile Arg	9	9	9	9	358790	324330	400020	425080	50217	37591	42054	62342
Phe Glu Ser Phe Gly	799090	752320	720090	908670	973050	686140	1046000	869410	9	9	9	9
Phe Glu Val Glu	706360	507890	489360	683310	702560	625870	842580	958950	64915	51446	67947	68651
Phe Ile Glu	155540	141080	134750	168790	165000	133840	174270	167500	10403	4917	10220	6001.9
Phe Ile Leu	1421400	1896000	1223900	1858600	3101100	1502800	3178500	2944400	103740	94664	109940	134910
Phe Leu Glu Lys Asp	603670	640250	558020	608720	743330	494540	759050	762500	24638	13966	24728	17580
Phe Leu Tyr Asp	126240	133580	106360	161830	206950	117510	198900	205750	9	9	9	9
Phe Lys Asp	686270	689120	741430	841870	803680	782450	778040	770230	659940	592490	645830	487340
Phe Lys Thr	252170	171860	231560	243720	186100	172480	241150	221370	138350	94771	109630	118090
Phe Phe Thr	54464	31450	41310	57529	34425	60001	51597	59778	3791300	3343500	5453300	3966600
Phe Pro Ser	404650	434000	485150	390980	512920	359040	507740	511700	122410	128060	158270	149210
Phe Thr Arg Lys	199480	129830	127470	218210	102770	124240	142380	137720	8993.5	9238.6	8403.7	10182
Phe Thr Lys Lys	1743500	1337600	1362400	1735300	1822100	1502000	2058400	2257000	12034	9	9	3152
Phe Thr Tyr Asp	9	9	9	9	9	9	9	9	504170	369370	420990	415360
Phe Tyr Leu Glu	11164000	14394000	11530000	13080000	13432000	10431000	15030000	17470000	429030	276060	386700	445570
Phe Tyr Ser	666640	453240	784900	626970	474030	498970	370200	598240	27156	62352	63960	58346
Phe Tyr Thr	480940	464370	426690	575550	590090	483060	594850	628790	9	9	9	9
Phe Val His Arg	9	9	9	9	9	9	9	14242	227630	418470	245470	278590
Phe4Cl-Gly-OH	1056100	1058900	1106400	1096100	1080400	1155900	1173000	1134200	1192900	1239400	1097900	1172500
Phe-Abu-OH	9	9	9	9	9	9	9	9	21227	24805	17212	17072
Phe-Asp-OH	4560300	4644000	4842800	4817600	4802900	5016800	5015900	4988800	5050800	5556600	4690300	4942700
Phytyl phosphate	20289	15552	15529	16085	15722	12799	15751	19447	38661	32990	26154	37787
Pleurotin	1245500	760990	892180	1780800	11195000	11071000	11840000	14459000	9	9	9	9
Pro Ala Asp Lys Thr	404090	433380	543960	723300	427740	449070	769690	593040	398460	392860	730630	431100
Pro Ala Glu	3085100	3036500	2821300	2667100	2639700	2021400	3522600	3057000	86524	106330	112540	110930
Pro Ala Gly	1520400	1420500	1239100	1599400	1328900	1114600	1738800	1757900	9	9	50467	63702
Pro Ala Leu	8338300	5520000	7535400	8335000	6039000	7333200	7027700	10147000	963190	887860	668450	876640
Pro Ala Phe	292920	314370	292040	371830	332510	262130	324120	404080	18368	19226	26124	31867
Pro Arg Trp	5978400	7396000	5331600	7884700	8089500	6437600	11705000	10452000	228820	207450	224590	196870
Pro Asp Leu	6421100	8033100	5745500	10480000	14885000	7229600	16248000	14553000	387750	411700	497010	495800
Pro Asp Thr Gly Ile	3104700	3071900	2701100	2973700	3113700	2599500	3219400	3293400	861810	787500	996570	883790
Pro Cys Glu	1678300	1222500	1904500	1186100	569810	822240	247040	426670	8063.1	5458.6	9354.5	8034.6
Pro Glu Ala	9	9	9	9	9	9	9	9	6115500	4700200	5620900	5320900
Pro Glu Glu Lys Ser	2735900	3389400	2981900	2935600	3260500	1885200	3398200	3826500	233030	177720	216060	142730
Pro Glu Gly	9	9	9	9	9	9	9	9	19211000	13738000	27021000	18266000
Pro Glu Thr	9	9	9	9	9	9	9	9	22708000	14975000	20755000	23264000
Pro Glu Val	210150	260050	216530	273270	370440	184350	281440	376520	2407700	2237700	2639700	2678600
Pro Ile Asp	638990	746590	495860	605820	906520	503230	1169100	861010	27145	18641	36584	40635
Pro Ile Trp	1258700	1627600	1116600	1393600	1685700	1169300	1865700	1897200	66326	65055	49664	73623
Pro Leu Met	395120	516350	439770	496200	468970	372990	476690	453920	94002	41046	53873	40035
Pro Phe Ala	341000	318260	277900	337670	339200	255750	341540	335900	15228	18009	16370	16973
Pro Pro Ile	9	9	9	9	9	9	9	9	1954100	1860200	1901500	1960500
Pro Pro Leu	663310	557490	529380	618310	504450	413570	555550	561000	18427	13677	14075	19184
Pro Pro Lys Phe Asp	5167900	4939700	4249700	5600800	2972300	2820700	3401700	3769500	229980	275220	293930	307150
Pro Pro Val	3977000	3773100	4295500	5577300	4993300	3439500	5119000	5428400	22399	11999	20674	23732
Pro Ser Asp	9	9	9	9	9	9	9	9	12294000	12498000	10434000	11251000
Pro Ser Ser	9	9	9	9	9	9	9	9	510390	463460	517320	522940
Pro Thr Ser	1517000	1024600	1266400	1176800	467350	813230	302330	402210	67336	125830	107820	149350
Pro Thr Val Asn Cys	9	9	9	9	9	9	9	9	126380	86840	95758	86490
Pro Trp His	1089200	1281000	907440	1345600	1701400	1182200	1916200	1793400	55742	39781	32700	36780
Pro Tyr Tyr	351410	343490	308240	417690	735880	719180	868050	948230	25937	18476	19403	32334
Pro Val Ala Glu Val	9	9	9	9	9	9	9	9	431230	338780	350610	454220
Pro Val Glu	1197800	1253200	1023200	1316700	1533000	1200100	1678200	1560000	48678	35957	48217	64847
Pro Val Thr	1339800	1403500	1280800	1497400	1322400	1101100	1763400	1470900	39413	17296	25801	25158
Pyropheophorbide a	9	9	9	9	9	9	9	9	34443	26067	23018	26714
S-(Indolylmethylthiohydroximoyl)-L-cysteine	297300	342100	353050	308900	369590	351590	364040	350020	27708	22006	19776	24876
Ser Ala Asp Lys	2266400	2300100	1899800	2839300	5532700	4970600	5577100	6794800	176520	123050	140790	200700
Ser Ala Lys Asp Met	417120	446560	401030	428880	403330	312110	487640	457930	9	9	9	9
Ser Arg Ala Lys	22172000	29204000	19179000	27936000	44144000	23262000	45291000	44775000	1920600	1366000	1624900	1663500
Ser Arg Glu Val Ser	718140	846830	594660	1008500	1578300	845530	1601800	1495700	9	9	9	9
Ser Arg Lys Glu Ser	420010	486800	431600	459060	450210	368980	537340	487810	9	9	9	9
Ser Asp His Arg	9	9	9	9	9	9	9	9	198340	176500	192190	188830
Ser Glu Glu Glu Ile	2752200	2714100	2007600	2199000	2954700	2059500	3170200	2913000	99426	75798	98447	149110
Ser Glu Leu Ser Met	3895900	3683800	3060400	4044000	5565100	6020400	6367600	6055800	108290	124800	94926	167360
Ser Gly Ala Asn Phe	9	9	9	9	9	9	9	9	499270	427830	568800	602300
Ser Gly Leu	867240	765870	866740	803830	735570	390290	815740	1011800	2098900	2088200	2645000	1924900
Ser His Phe Lys	17155000	15897000	13479000	18667000	29111000	26241000	34117000	28087000	4899300	3410100	3702800	3863300
Ser Ile Ser	2646200	2701400	2178700	2808600	3192900	2411500	3310400	2809200	606340	897340	1066200	1177200
Ser Ile Thr	667100	800200	748620	736190	759760	882330	874970	982670	403930	444880	631430	471050
Ser Leu Glu Asp	88681	91557	83782	121950	102920	84473	111680	100570	9	9	9	9
Ser Leu Val Ser Asp	278140	330910	334140	288180	337780	259090	317670	275840	9	9	9	9
Ser Phe Asp Lys Ser	232190	191480	181140	135120	237470	112610	238740	266260	9	9	9	9
Ser Pro Ala Ile Asn	10767000	10438000	10082000	9943500	13460000	9756200	13271000	13776000	9	9	9	9
Ser Pro Leu	9	9	9	9	9	9	9	9	4486700	3550700	4510600	3881700
Ser Pro Thr	9	9	9	9	9	9	9	9	2068100	2400400	1975400	3464900
Ser Pro Val	553680	647720	649610	511610	647920	545560	742320	760310	8378300	6758000	9295900	6361900
Ser Ser Gln	2822500	2554100	2753600	2751300	2438300	2380900	2878000	2872400	94636	47455	71720	58985
Ser Thr Leu	9	9	9	9	9	9	9	9	18460000	16198000	25686000	17138000
Ser Tyr Gly	165160	143420	159850	116500	173120	105660	161750	128600	2123100	1867700	2081600	2111400
Ser Tyr Lys Asp	2636100	2158400	2086500	2658400	2100000	2520500	2635500	2709000	9	9	9	9
Ser Val Glu	283080	104090	322260	189460	301860	188160	377250	324490	19539000	17539000	21054000	19184000
Ser-Arg	6750400	6218200	6355500	5310800	7435300	5346600	8489500	8414900	103120	91811	121590	101130
Ser-Nap-OH	9297100	8568800	8441700	12311000	24468000	21878000	27248000	29403000	46246	28139	24512	43397
Ser-Trp	35793	36935	34578	61639	9	9	9	9	857410	668180	933540	842870
Spheroidenone;Spheroiden-2-one	1958100	1363600	1504400	1529200	1272900	1652400	1639800	1032700	1671100	1638000	1654700	1588800
Stearidonoyl glycine	86415	52729	86719	97558	241830	151410	251920	234340	9	9	9	9
Terpendole E	785140	721080	636980	735510	1504400	1289700	2092600	1700300	19683	13501	23575	17419
Terpendole G	9	9	9	9	4260300	2586200	4237100	5500100	4074.3	9	9	3427.8
Terpendole J	4875.2	2942	3884.8	5115.1	14522	14720	20767	18526	14254	15608	18767	16232
tetranor-PGAM	280440	220110	245110	272070	266340	231400	271600	311150	4889	5334.7	7837	3943.8
Thalicsessine;21-(2-Hydroxyethyl)-6,21-secohetisan-6,11,19-trione	1659700	1649800	1699500	1697000	1647100	1726300	1709000	1779700	1780200	1886900	1720900	1878900
Thr Arg Gln Glu	1455900	1967400	1826100	1457800	2554700	1244400	1640200	1319800	1566500	1510300	1627900	1412400
Thr Arg Phe Glu	1549200	1120400	1517400	1378600	527530	921990	454050	836440	5699.9	4677	7348.7	7897.9
Thr Asn Ile Asp	25425	32454	46156	40190	44312	30443	56107	39769	9	9	9	9
Thr Asn Lys Glu	399370	479270	327460	583600	1141300	511530	1376200	1179500	9	9	9	9
Thr Glu Leu Lys	970630	901280	920540	980010	494180	571150	612100	597980	9	9	9	9
Thr Glu Phe Asp	17994000	17009000	15578000	15044000	14297000	13209000	16322000	19480000	561830	473240	514190	673660
Thr His Leu Val Asp	549890	648900	433860	639780	232580	167910	230290	279390	66826	12906	23277	21778
Thr Leu Asp Glu	79814	82796	85991	93475	82973	69738	77682	99709	9	9	9	9
Thr Phe Leu Arg	13268000	17508000	14481000	14640000	13205000	11220000	16682000	18595000	671140	580280	675130	503420
Thr Trp Met	4703000	2751200	2108400	2333100	2439900	3185200	3321200	3401300	474010	242900	261370	313030
Thr Tyr Leu	275910	253830	217170	334520	446550	537800	537510	694160	14446	6410.9	7100.3	10981
Thr Tyr Leu Glu	851150	745030	579830	854150	1245900	1276500	1528100	1667500	41021	22641	26992	39134
Thr Val Thr	2704700	1906600	2131000	3202100	2694000	2117000	3668200	3260200	133250	95886	50109	123070
Thr-Lys-OH	4674	9880.3	7004.5	4494.3	6280.6	4312.2	5989.5	4956.9	48910	42723	41236	43089
Trifenmorph;4-Tritylmorpholine	23732000	21879000	22559000	24374000	17781000	17795000	19562000	22352000	211590	166510	108870	110160
Trp Gln Ile	3023200	2980700	2085300	2958900	3395500	2209700	3215100	3191100	242700	150090	268380	296320
Trp Glu Tyr	3334300	3401100	2535100	3722500	3533900	2667600	4109200	3481300	117320	112390	111030	106120
Trp Leu Trp	2589100	2416000	2304500	2818700	944890	1001700	1212600	1275900	891940	570410	635120	1012000
Trp Trp Val	2133900	377840	2289000	2635800	47984	27484	443140	49277	9332.1	8304.7	14001	13967
Tutin	968700	1107400	1289500	1146900	972910	1178900	1251700	1241900	1025100	1058600	894510	914810
Tyr Ala Arg Asp Glu	267340	164010	159480	366510	536240	382100	554280	616250	9	9	9	9
Tyr Ala Asp Lys	9	9	9	9	4938300	6163500	5726600	4491300	171620	258160	233770	343460
Tyr Arg Leu	7656100	7501600	7346500	7709500	6178700	6069200	6999500	6266900	7066100	7332000	7959700	7307600
Tyr Glu Asp Tyr Val	1037200	821860	953730	1595000	5290200	5824400	6063700	4466200	585710	829370	588020	996210
Tyr Glu Gln Asp	237980	189960	155560	231900	294100	311180	442780	469620	15938	12985	12761	16694
Tyr His Arg Arg	5052000	5639400	5183800	6330500	5694900	4054100	6151500	6293400	80629	94276	109150	118280
Tyr Phe Glu	1809800	2225400	2127000	2283800	2645000	1967700	2694500	2625700	85812	66892	85026	112500
Tyr Phe Val Arg	11506000	12062000	9813200	13335000	11805000	9399700	13275000	13724000	313400	229730	308260	388420
Tyr Pro Glu	67934000	81496000	72821000	72211000	58524000	53877000	46080000	73647000	638850	709030	944720	857770
Tyr Pro Ile	241400	261740	190040	287380	318290	196590	439610	353360	9	9	9	9
Tyr Pro Thr Val Asn	828740	1112100	708880	882980	736630	469550	477320	697180	33518	30016	25235	46005
Tyr Ser Phe Val Phe	9	9	9	9	9	9	9	9	38127	25762	28521	29471
Tyr Ser Val Glu	9	9	9	9	9	9	9	9	180000	133950	139570	137430
Tyr Thr Ala Glu	306010	240160	242470	326330	599110	613010	724560	860300	25916	17351	17706	23139
Tyr Thr Gln Arg	223890	233050	233910	336760	587650	554540	662130	669030	12957	4198.3	6342.4	8729.3
Tyr Trp Cys	122510	163240	173410	175280	180170	159510	191170	204420	130910	127990	131630	125760
Tyr Tyr Thr	794170	636480	922210	857500	2910800	1963000	2812700	2694500	26304	20816	18431	20405
Tyr Val Ser Arg	58754	26540	41004	63666	1734000	1610600	1736900	1786400	9	9	9	9
TyrMe-HoPhe-OH	9	9	9	9	9	9	9	9	109220	132880	127960	105680
TyrMe-Lys-OH	9	9	9	9	9	9	9	9	3727200	2740900	4282700	3137600
Val Ala Ser Asp	9	9	9	9	9	9	9	9	174120	96679	159340	134310
Val Gln Ala Arg	9	9	9	9	9	9	9	9	100690	76895	88457	91737
Val Glu Ala	109290	164680	95146	142050	117610	90611	115980	144950	915630	771770	852100	773720
Val Glu Glu	331980	257500	248260	310380	283430	209280	279930	310010	375390	346030	430820	384930
Val Glu Leu Asp Asn	459950	461370	357680	536080	436760	393540	510250	437530	17987	11645	10364	11204
Val Glu Phe Asp	216640	179590	171320	247710	572190	534320	639780	804050	39532	30234	31015	43779
Val Glu Pro Ser Asp	7972600	10529000	9759700	9371800	8876100	7285600	10811000	11943000	482950	396830	380670	431590
Val Glu Thr	9	9	9	9	9	9	9	9	446100	431550	464990	493200
Val Glu Thr Glu	1041100	1117500	871590	1247300	1353600	812630	1583900	1467400	357750	293880	227340	335310
Val His Leu Asp	9	9	9	9	9	9	9	9	544620	421740	504310	490550
Val Ile Glu	209460	220240	185870	258250	249560	197260	291460	212730	28534	27259	20798	28544
Val Leu Ser Pro Ala	7446200	8421700	5996100	8759200	8316300	6590300	9178500	7978200	86434	51192	77895	92414
Val Lys Asp	2943000	4069800	3036400	4187400	6631800	4375600	8367400	6858400	21913	28705	23585	30448
Val Lys Glu	481650	456250	486160	476680	685660	471940	742030	782050	453520	398240	425960	503560
Val Lys His	31564	20348	20835	14045	15481	17599	18086	11064	69134	37730	29693	36938
Val Thr Ile Asp	50348	53842	41988	41759	55825	37404	54245	66165	31272	27049	30194	27221
Val Thr Leu Asp Met	772740	938240	653650	739560	682710	634850	1075100	951990	68094	68259	31972	56747
Val Tyr Glu Lys	2692800	2540700	1763800	2912900	98592	229830	124160	150880	1908300	1506800	1760300	2342400
Val Tyr His Lys	9	9	9	9	9	9	9	9	2615000	2123400	1994000	2205800
Val Tyr Lys Val Leu	72416	77908	91544	65533	117350	134680	113990	42748	84418	40320	38324	79800
Val Tyr Ser Lys	620100	730670	547320	551300	728250	439050	680620	790320	9	9	9	2913.3
Val Val Glu	1018900	1396700	1188800	1253700	1522600	1138100	1468000	1523100	272480	192770	295880	293760
Variotin;Pecilocin	1607900	1248900	1352000	1690600	1824600	1325400	1888100	2162300	16325	7863.9	6787	9260
Veratridine	693920	751450	624560	858070	723080	609080	820180	804500	9	9	9	9
Hyponitrite	13591000	12475000	16129000	12432000	13107000	12319000	13449000	13294000	13748000	6542500	13405000	9934400
3-amino-6-(hydroxymethyl)oxane-2,4,5-triol	15683000	12509000	12868000	18017000	26219000	33619000	27085000	31763000	1007500	938220	909900	917380
3,7-dihydropurin-6-one	29317	15308	31696	38028	956970	926440	1046300	762770	1867400	2177500	1955000	2726400
butanedioate	4100100	4181200	4455200	4587300	4973600	4694600	4291000	4877400	5390900	3600000	3602800	4814800
9-[(2R,3R,4S,5S)-3,4-dihydroxy-5-(methylsulfanylmethyl)oxolan-2-yl]-3H-purin-6-one	1590600	1431100	1413300	1670200	1184100	1151900	1063300	1176200	35669	56122	63253	80668
3-(2,3-dihydroxyphenyl)benzene-1,2-diol	9	9	9	9	9	9	9	9	694160	716340	530390	436930
(4R)-4-[(3R,5R,8R,9S,10S,13R,14S,17R)-10,13-dimethyl-3-sulfooxy-2,3,4,5,6,7,8,9,11,12,14,15,16,17-tetradecahydro-1H-cyclopenta[a]phenanthren-17-yl]pentanoic acid	9	9	9	9	9	9	9	9	24624	14541	15484	17864
(E)-but-2-enedioate	480390	470610	493960	480620	269250	369340	233650	272080	380250	357100	389050	363310
(2S)-2-azaniumyl-3-(1H-indol-3-yl)propanoate	4895.5	5596.1	2787.5	5353.2	2989.7	3265.3	3810.6	3297.9	8616.7	5349.9	7190.5	7900.3
(2S)-2-azaniumyl-3-phenylpropanoate	2143600	1306000	1647900	1724300	17249000	7861600	17234000	22635000	646670	927630	1226100	1336700
(2S)-2-azaniumyl-3-(5-hydroxy-1H-indol-3-yl)propanoate	568810	596980	517780	548900	843310	576440	789120	835210	63573	75675	81952	95717
(2S)-6-[5-[(3aS,4S,6aR)-2-oxo-1,3,3a,4,6,6a-hexahydrothieno[3,4-d]imidazol-4-yl]pentanoylamino]-2-azaniumylhexanoate	9	9	9	9	9	9	9	9	75786	82965	63392	74401
(2R,3S,4S,5R)-2-(hydroxymethyl)-6-(2-phenylethoxy)oxane-3,4,5-triol	9	9	9	9	9	9	9	9	180600	143280	136780	156060
[(2S,3R,4S,5S,6R)-3,4,5-trihydroxy-6-(hydroxymethyl)oxan-2-yl] benzoate	9	9	9	9	9	9	9	9	1166900	1062300	1096100	1096200
(2R,3S,5S,6S)-3,5-dihydroxy-2-(hydroxymethyl)-6-[(2R,3S,4R,5R,6S)-4,5,6-trihydroxy-2-(hydroxymethyl)oxan-3-yl]oxyoxan-4-one	5362.8	9236.5	9	9	9	9	9	7720.1	1250300	513670	1039100	552260
(2R,3R,4R,5S,6R)-6-(hydroxymethyl)-5-[(2S,3R,4S,5S,6R)-3,4,5-trihydroxy-6-[[(2R,3R,4S,5R)-3,4,5-trihydroxyoxan-2-yl]oxymethyl]oxan-2-yl]oxyoxane-2,3,4-triol	1090600	1047300	1089100	1091000	909520	895180	905030	996980	1973800	1501400	1451000	1798000
2-acetamido-N-[(2S,4R)-4-hydroxy-2-(hydroxymethyl)-5-[6-(methylamino)purin-9-yl]oxolan-3-yl]-3-(4-hydroxyphenyl)propanamide	1533700	1830700	1452600	1684500	1510600	1387500	1643300	1701100	48525	44082	59136	58912
(2S)-2-azaniumyl-3-(7-chloro-1H-indol-3-yl)propanoate	53812	55477	56294	63875	59042	48744	66630	79089	95997	82369	82712	86050
(2S,3R,4R,5R,6R)-2-[(2R,3R,4R,5R,6R)-4,5-dihydroxy-2-(hydroxymethyl)-6-methoxyoxan-3-yl]oxy-6-(hydroxymethyl)-5-methoxyoxane-3,4-diol	9	9	9	9	9	9	9	9	360370	403170	271160	342430
(2R,3R,4S,5S,6R)-4-[[(1S,3S,4S,5R,8R)-4,8-dihydroxy-2,6-dioxabicyclo[3.2.1]octan-3-yl]oxy]-6-(hydroxymethyl)oxane-2,3,5-triol	205000	216270	210730	222760	288200	273550	276950	300490	10700	13567	15953	11729
(2S)-2-azaniumyl-3-(4-hydroxy-3-methylphenyl)propanoate	9	9	9	9	9	9	9	9	1281100	1054400	956910	1224000
(2S,3R,4S,5R,6R)-2-[[(2R,3S,4R,5R,6R)-6-[(2S,3S,4S,5R)-3,4-dihydroxy-2,5-bis(hydroxymethyl)oxolan-2-yl]oxy-4,5-dihydroxy-3-[(2R,3R,4S,5R,6R)-3,4,5-trihydroxy-6-(hydroxymethyl)oxan-2-yl]oxyoxan-2-yl]methoxy]-6-(hydroxymethyl)oxane-3,4,5-triol	19527	13207	18610	14235	23047	15321	21254	20524	274110	334810	402230	342510
(2S)-N-[(2S)-1-hydroxy-3-(1H-indol-3-yl)propan-2-yl]-3-methyl-2-(methylamino)butanamide	190220	171500	160380	190540	157460	140200	160090	181360	61775	46928	58682	56572
N-hydroxy-2-(4-hydroxyphenyl)ethanimine oxide	97710	111570	86629	112750	94495	90632	110240	120680	8221.4	9469.1	7079.2	7722.5
[(2S)-2,3-di(tetradecanoyloxy)propyl] (6Z,9Z,12Z,15Z)-octadeca-6,9,12,15-tetraenoate	36903	30011	34974	34784	31039	38389	35113	39799	33018	29483	29598	30776
[(2S)-2-hexadecanoyloxy-3-pentadecanoyloxypropyl] (6Z,9Z,12Z)-octadeca-6,9,12-trienoate	36868	43748	46703	69457	100380	108740	128330	136560	26669	12513	13064	20730
(4Z,8E,10Z,13Z,16Z,19Z)-7-oxodocosa-4,8,10,13,16,19-hexaenoic acid	30966	23704	25805	40327	57580	48784	69758	73994	19289	20226	19793	21614
(2S)-2-[[4-[(6aR)-3-amino-1-oxo-2,5,6,6a,7,9-hexahydroimidazo[1,5-f]pteridin-8-yl]benzoyl]amino]pentanedioic acid	9	9	9	9	9	9	9	9	158500	111830	89455	141940
Raucaffricine;Vomilenine beta-D-glucoside	7405100	6251800	6289800	6977900	3087500	2846900	3840500	3910700	27852	12590	13589	21240
Angustifoline	574500	612550	339250	620660	563910	537650	453940	543470	576820	442920	337710	487420
Pro Trp	1378700	1095100	1221200	1101000	801640	671350	840820	793610	46773	70359	14212	84169
12-Oxo-2,3-dinor-10,15-phytodienoic acid	64833	94462	90983	30575	27505	26294	51615	60972	31634	42899	34292	39829
3-(2,5-dimethoxyphenyl)propanoic acid	66553	66588	59555	84251	93157	94664	45513	110930	18158	18522	18872	12889
Acepromazine; LC-ESI-QTOF; MS2; CE	610310	561650	883560	686540	1453400	1462100	1555200	1872800	79687	90965	92182	130190
Ametryn; LC-ESI-ITFT; MS2; CE	9	9	9	9	9	9	9	9	449090	331900	414780	317930
BUTACAINE	9	9	9	9	9	9	9	9	1980300	1513900	1659400	1468800
CARBETAPENTANE	181540	160530	218660	170590	221170	174880	243240	254870	124580	159740	127100	300190
Carminic acid	9	9	9	9	9	9	9	9	1043200	932500	860530	1028900
Dimethyl??sulfoxide	5270200	4798500	5027800	4745100	4359100	4804900	4958400	4244700	5118400	3024500	5184900	4819200
gamma-Undecalactone; LC-ESI-QTOF; MS2; [M+H]+; CE	218300	160720	272210	120810	234050	125560	156660	167700	170790	113840	127260	97564
Norharman; PlaSMA ID-382	942350	833530	1144000	814060	1654800	1508600	2425300	1851900	363450	460280	432180	542060
PUROMYCIN	228330	230510	162010	243150	238590	188310	236880	209050	140590	96068	136080	72782

## Sheet: Supplementary File 1b
	HK-K12				HK-yfbR				Live-K12
Compounds	HK1	HK2	HK3	HK4	HY1	HY2	HY3	HY4	Con1	Con2	Con3	Con4
O-Phosphorylethanolamine	400180	464060	377970	443620	389910	494420	474310	481380	87364	85662	52016	73775
LPS(22:6/0:0)	97689	100670	107970	88406	97067	137160	101970	122650	109880	114130	116990	116780
LPE(18:1/0:0)	282540	252950	236750	338540	1312500	1385000	1504000	1795000	19294	12374	9284.6	13691
LPE(18:0/0:0)	502550	459090	410080	442350	1345800	1382900	1614000	1786100	39698	24558	25678	32507
LPE(16:0/0:0)	410340	367820	329740	421980	599060	656120	776790	848440	35320	22809	23643	29999
LPE(14:0/0:0)	588280	519430	474800	664180	1105300	1003200	1272100	1303600	18871	8717.2	12584	14837
9,10-DiHOME	20317	12681	14960	15552	16253	16509	22632	22058	11326	9682.2	7448.9	7363.3
FFA(16:1)	5651600	2460000	2615300	6071100	10158000	9114800	6937000	9751800	141590	67870	24926	44187
FFA(16:0)	12597000	20860000	19489000	9524600	16006000	20216000	22533000	24199000	2530100	3780800	7584600	5598200
FFA(18:2)	372190	178350	157050	412770	877650	743760	590440	775680	4233.9	3854	6653.6	7084
FFA(12:0)	1279900	953250	1201900	1297800	1442700	1412900	1536800	1772800	74942	71063	66105	84188
DHA	541140	448190	453140	563760	340290	353530	375290	499380	24726	19514	22058	17805
8,15-Dihete	2933800	921640	794320	3981400	3880400	3244200	2085600	3066600	115970	45229	9051.5	32697
Tetradecanedioic acid	24874	21989	25555	19549	27204	24311	23609	24259	32337	35744	33773	34754
Hexadecanedioic acid	113630	100540	94398	105270	63800	63168	66622	76603	49848	57069	53931	49962
11,12-EET	1849.3	1715.2	2243.4	1174.1	2113	2336.8	3035.8	3351.6	7106.1	5282.6	5936.1	4842
11-deoxy PGE1	67885	62046	62693	72268	49039	52681	57593	59003	44390	47815	45303	49767
FFA(9:0)	16086	13473	14955	17872	13785	15536	11975	14048	16251	16632	9997.5	12422
13(R)-HODE	79600	53702	78670	76419	179570	153540	106810	191490	15078	15402	10536	18330
Tetranor-12(R)-HETE	2392300	3644300	3452400	2623900	5923800	4749600	7760700	6388900	2223100	5228900	2806500	2235700
cis-EODA	410080	408930	494540	462840	456240	455980	454230	467350	434700	412410	420430	413900
16-Hydroxyhexadecanoic acid	258010	197550	213830	244630	493310	408210	633610	607400	150620	166880	175120	97573
DL-2-hydroxystearic acid	28604	32196	34511	21765	29156	29655	49012	60016	17965	23243	30363	6403.8
2-hydroxyhexadecanoic acid	258010	197550	213830	244630	493310	408210	633610	607400	150620	166880	175120	97573
FFA(15:1)	188500	288150	355730	153250	150860	120190	248130	217310	422220	576080	548870	71482
LPE(22:6/0:0)	38330	27390	26155	30930	20356	22994	44512	55153	20282	18387	12896	14893
LPE(0:0/20:2)	23784	17193	13474	27108	104760	91279	101110	152980	9	9	125.52	9
LPE(20:2/0:0)	23784	17193	13474	27108	104760	91279	101110	152980	9	9	125.52	9
LPE(20:4/0:0)	50991	20020	27902	38017	980840	774150	1061800	1235700	15062	3561.1	6163.5	4786.2
LPE(0:0/18:0)	502550	459090	410080	442350	1345800	1382900	1614000	1786100	39698	24558	25678	32507
LPE(0:0/18:2)	731350	718940	614080	916270	7764500	6991000	9010000	11086000	39807	29065	29051	30290
LPE(0:0/16:0)	410340	367820	329740	421980	599060	656120	776790	848440	35320	22809	23643	29999
LPE(0:0/16:1)	84518000	76717000	63160000	91219000	172920000	164230000	173870000	159350000	1013000	315370	331380	410560
Glycine linoleate	5505.8	7868.9	9947.7	10863	30693	6875.8	10797	13765	1636.1	1982.6	1289.9	1569.6
Tridecanedioic acid	73893	69441	73045	71030	100950	67680	125240	63148	81929	105470	79710	98554
13(S)-HOTrE(γ)	48765	37875	28959	22829	10266	15576	26976	22987	8580.3	13927	10682	10550
9(S),12(S),13(S)-TriHOME	55112	46469	44231	58273	56656	47141	54976	72025	192540	141460	148380	167030
Glycerophospho-N-Arachidonoyl Ethanolamine	3083000	2911400	3191300	3258600	2433500	2370500	2678700	2973100	2435200	2152000	2458900	2411000
FFA(16:2)	9141.6	6606.9	7364.5	6999	3976.6	12450	12297	14759	10205	9672	8820.7	9089.3
Dodecanedioic Aicd	10599	12831	14628	6211.1	14671	12418	16717	9256.6	16690	23947	28182	17220
LPC(0:0/14:0)	447000	344260	405650	587750	1407500	1220100	1349600	1247300	17691	2423.8	7489.5	6582.1
LPC(16:0/0:0)	6917600	6449000	5642700	7864400	16044000	13163000	19090000	15863000	1993500	1220800	1283100	1302900
LPC(17:0/0:0)	4747000	5273600	5698400	4796200	5502800	5224200	5380600	5944900	5377000	5793300	5710700	5326100
LPC(15:0/0:0)	675600	560680	561000	784720	1160300	1023100	1267800	1120900	73741	71710	73567	73923
LPC(0:0/18:2)	84236	17697	44322	57580	72293	111860	110250	84623	22811	9263	11712	17745
Carnitine C2:0	85792	114780	136830	80345	93668	88340	105880	106550	889840	1070700	897850	994390
DL-Carnitine	104510	110040	139430	91781	121880	124650	122340	81547	3234800	2642300	1812300	2568700
15-deoxy-δ-12,14-PGJ2	9	9	9	9	9	9	9	9	66406	26895	78979	74842
LPC(O-16:0/2:0)	3246200	2819000	2484300	3330700	8725100	7014400	11658000	8961800	1178000	897100	1259500	1213400
3-Dehydrosphinganine	643000	449870	575740	623510	384220	548420	2061800	546720	266780	233540	374460	222850
LPE(16:1/0:0)	1988800	1857200	1495600	2382400	44894000	44292000	48861000	54081000	105730	18503	22228	30608
Sphingosine	643000	449870	575740	623510	384220	548420	2061800	546720	266780	233540	374460	222850
MG(18:2/0:0/0:0)	93648	98548	86647	95854	99922	79296	69343	63844	84975	134850	108450	66664
LTE4	2003.3	3416.9	1837.4	2666.1	6488.7	3959	14296	15324	12237	8257	10150	9010
PC(O-16:0/O-1:0)	18333000	16032000	14236000	19681000	37182000	31433000	43213000	37077000	5202500	3387400	3760900	3798600
MG(0:0/16:0/0:0)	1172600	1170500	1246800	1079700	1240100	1698200	1714900	2003900	1764300	1178700	1258500	1771900
LPC(0:0/20:4)	295100	124470	170910	264490	372150	274280	552570	718580	43174	8189.9	16446	25289
LPC(20:4/0:0)	295100	124470	170910	264490	372150	274280	552570	718580	43174	8189.9	16446	25289
LPC(18:0/0:0)	1257700	1143500	986450	1399900	3645500	1961700	4103000	3669900	224430	173610	149950	203510
LPC(18:1/0:0)	10158000	6137200	6834500	11699000	23842000	18886000	27770000	26623000	407160	276380	383150	327080
LPC(18:2/0:0)	588980	196670	270500	558710	622640	852010	944180	987420	813750	470360	566570	439350
LPC(0:0/16:0)	18176000	15845000	14118000	18789000	37588000	31511000	45939000	37136000	5471600	3318300	3847500	3664400
Carnitine C23:5	348400	294690	278030	310370	115170	120280	147310	157610	118340	82538	76306	125650
Carnitine C22:2	1701600	1164900	1157000	1244300	5145100	5273200	5853800	6210400	93659	64959	57395	67973
Carnitine C19:2	782340	899480	901170	798250	1194300	1105300	1007200	984620	1175800	1366000	1278500	1177300
Carnitine C18:3-OH	171980	159150	139320	226290	180630	169660	209250	251450	28177	15421	19215	22308
Carnitine C15:DC	31242	27104	33893	44956	11467	13279	27886	14328	14602	11387	9090.8	18023
Carnitine C9:0	139330	122330	133790	169260	144360	110980	155920	177040	9	9	9	9
FFA(22:7)	27415	31026	33907	29579	32551	15855	26784	30449	24721	40643	30169	21570
Carnitine C16:2-OH Isomer 1	68743	58254	52239	69118	148830	126580	175720	189100	15373	5891.8	9464	13593
Carnitine C18:1-OH	13113	10872	10618	11514	15796	14260	12793	18082	9	9	9	9
Carnitine C16-OH	45880	34781	41484	41422	19818	24014	37294	16793	16813	16222	17581	15624
PC(O-16:0/0:0)	1154100	1660500	917860	1471700	8773700	4377700	1946100	2118100	28559	20988	33494	35644
LPC(O-18:1/0:0)	663880	346370	562650	783710	1356700	902260	1325500	1617200	9	9	9	9
Phytosphingosine	9	9	9	9	9	9	9	9	137170	143170	178080	174930
LPE(15:0/0:0)	9812300	9556100	8412700	11249000	7180100	7292500	9586800	10335000	656940	426460	585560	658180
LPC(0:0/17:0)	7690400	8194400	7554800	7769300	8327300	8347200	7793900	8778700	8278100	7497100	8032400	8010200
LPC(0:0/15:0)	348170	263590	260870	345280	804680	767180	628030	592390	4287.1	11636	15655	10195
LPC(0:0/16:1)	248980	223690	203470	326710	1082200	710590	990340	1124700	7972.9	6071.4	5724.9	4010.1
LPC(0:0/18:0)	2669500	2380300	2059000	2359700	7237700	5262200	8721700	8193700	845180	752470	960740	903570
LPC(0:0/18:1)	3118700	2080300	2613100	3561300	8718100	7037700	9334500	9168700	92442	44385	59064	32404
LPE(17:1/0:0)	13379000	13546000	12331000	15085000	9197600	8488800	10195000	9596700	466900	221810	228650	306010
LPE(0:0/20:4)	9	9	9	9	9	9	9	9	303870	379340	374250	500300
LPE(18:2/0:0)	1492100	1085200	784340	1344700	15087000	11018000	10998000	22241000	458840	346340	548650	545290

## Sheet: Supplementary File 1c
	HK-K12				HK-yfbR				Live-K12
Compounds	HK1	HK2	HK3	HK4	HY1	HY2	HY3	HY4	Con1	Con2	Con3	Con4
L-Threonine	1036300	845310	1181500	1001900	540020	968240	467880	635470	42977	63834	45541	49885
L-Aspartic Acid	4894900	5039500	5619800	4214200	2778600	3844500	2489300	2783200	4252300	4126800	3554200	4025800
3-N-Methyl-L-Histidine	54157	65014	42867	45059	9	9	9	9	214440	217320	153850	199310
4-Hydroxy-glutamic acid	33181	30265	38470	41055	9	9	72193	58372	70633	59513	29982	87459
Ala-Ala	223040	312620	225330	290090	83531	87981	78488	88708	360860	492320	241110	148990
N-Acetylaspartate	67698	101640	68639	68592	78092	58973	81412	65279	46546	27237	33441	56869
N-Acetyl-L-Leucine	1624100	1660300	1527100	1709200	1392000	1188900	1400300	1530700	1044500	1609200	1183100	735800
N-Phenylacetylglycine	119650	101940	109050	113510	113150	91887	114630	118720	23586	15296	15769	8137
N-Propionylglycine	3321000	2993000	3020200	3367100	2998600	3231600	3067700	3274400	577850	494700	551760	535140
O-Phospho-L-Serine	9	9	19760	34758	9	9	9	16202	448340	242730	119140	319510
Kynurenic Acid	187190	198860	171660	213450	168980	127500	179030	186300	91981	91907	84009	98445
N-Acetylmethionine	31331	30692	29807	29411	23800	20294	25533	30981	50788	98013	79095	43213
N-lactoyl-phenylalanine	441190	427950	419090	467560	499920	380620	496990	530290	18219	16528	19275	25479
N-Acetyl-L-alanine	560860	496130	548120	532880	575520	532240	590130	606000	47332	68449	58778	52631
N-acetyl-beta-alanine	589410	583220	624850	560380	647030	533440	596480	725190	67311	81715	56540	62220
Cysteine glutathione disulfide	191220	196560	183710	125290	56070	57402	56890	67420	657200	245070	387820	280110
N-acetylornithine	8631200	8304500	8411600	9311600	8792500	8568600	9432300	9203800	284810	271880	216850	214250
Gly-Val	148030	87967	159140	135150	91778	105110	134620	180550	7331.9	6083.7	8585.8	8915.7
N-hexadecyl hydroxyproline	55893	34070	44696	87260	524460	550180	567600	699460	9	9	9	9
3-(pyrazol-1-yl) -L-alanine	1866300	1758100	1813200	1974700	1540600	1497100	1506000	1680600	5757600	4026400	4242700	4703100
N-Palmitoylglycine	85683	65069	78178	98316	153650	118000	166340	170740	53048	51295	60908	45574
Allantoic acid	9	9	9	9	9	9	9	9	14019	14804	15537	7354.4
Glu-Gln	434930	489160	634460	434040	653660	597370	534970	572500	44568	36100	18189	39750
N-Arachidonoyl-L-Alanine	200110	124980	190100	268630	510980	345820	614030	601520	2589.8	2103.8	2372.7	2052.3
Acetylvaline	24686	29025	28081	29667	18731	17817	21781	25008	83944	84725	82461	69280
Cyclo(his-pro)	445340	369050	360510	538090	367060	365980	400910	437710	9	9	9	9
Val-Ala	101310	95956	114130	101490	113690	97415	108970	110320	156080	154750	139740	152620
Ile-Pro-Ile	696360	621410	694400	715480	449110	527870	369860	609880	9	9	9	9
Glu-Thr	1545800	1392400	1647100	1425900	1099500	1197500	1165600	1355200	139100	122520	111820	137300
N-AcetyTryptophan	5290.3	4375.2	4434.8	5623.2	5871.1	3945.2	4785.5	5391.9	2619.3	9549.2	8124.2	3899.7
L-threo-3-Methylaspartate	6721200	7015400	6972900	7249000	5979400	5976000	5762500	5579900	622410	543210	592870	506020
Glycine	732000	788970	990180	670710	806120	913330	732530	829380	524980	705250	694930	655800
L-Cystine	32340	37113	55273	19175	80497	50481	46029	61279	599230	744060	493630	624750
L-Tyrosine	394820	366300	500730	413400	394820	357640	426430	287080	173970	134910	167460	162320
L-Arginine	50838000	47895000	50963000	46158000	48733000	55217000	57519000	51991000	794580	853760	381240	682280
L-Lysine	27063000	22742000	29087000	24052000	74167000	67955000	85599000	73049000	13503000	10977000	11194000	9768800
L-Ornithine	1173700	793910	877120	1138200	942160	1018400	1089100	967250	587940	490370	512730	674570
L-Alanine	33718000	37751000	42999000	33776000	35752000	34891000	30426000	35009000	4624100	5616000	4717900	4712100
L-Citrulline	1739100	1608900	1997100	1639300	1654800	1627900	1670300	1823700	212160	216830	171860	182900
L-Glutamic Acid	27765000	18786000	23649000	23970000	18027000	27345000	29988000	15403000	4327100	5841300	4966100	5470600
L-Histidine	9925400	10765000	11869000	9526000	10000000	9039200	8669100	8991300	16986000	12467000	14588000	13989000
L-Methionine	163110	206310	307960	243190	176730	179450	268510	169180	93946	59031	72049	78535
L-Phenylalanine	97328000	100500000	102400000	94376000	89250000	93875000	95950000	93090000	36641000	47949000	47872000	47309000
L-Proline	50159000	47169000	55388000	44979000	35646000	41847000	54041000	40311000	5145200	4760100	3383800	4219700
L-Serine	1857900	1730300	2560300	1473300	1090400	1760600	739880	1254600	236350	267900	311010	282580
L-Tryptophan	6040100	4947300	5754100	5670500	53043000	34512000	56351000	66899000	2763200	3029100	4526700	4582500
L-Valine	2591900	2567600	2696300	2696000	2051000	2263200	2374000	2381000	406870	265030	452580	407760
(5-L-Glutamyl)-L-Amino Acid	110550	222050	131520	267160	100960	195610	184990	165070	1710600	2195500	2352700	2886500
5-Hydroxy-L-Tryptophan	75039	76674	83928	76849	114500	84861	102620	101770	9	9	9	9
5-Oxoproline	1563400	1294300	2001700	1363400	2570000	1521900	1791100	1642200	452310	410060	407930	480550
Asp-phe	9	9	9	9	9	9	9	9	172160	109240	137820	105220
Glutathione Oxidized	1166400	1513700	892470	1329300	140950	187240	198060	170300	1027000	53892	212600	204520
Glutathione Reducedform	250050	209060	269030	202500	156940	63868	132560	117790	29446000	9239100	12694000	16593000
Glyc-Pro	29316	45123	32555	23095	54668	26784	26283	55179	93665	82068	141950	87248
L-Cystathionine	264640	216190	291190	230450	418300	468280	290460	358780	4991.3	9	9	9
L-Cysteine	13679000	13735000	16314000	14339000	13596000	16959000	11638000	14185000	11928000	15227000	12226000	12035000
L-Glutamine	24429000	19015000	26848000	21862000	66876000	63469000	80899000	66775000	12413000	10073000	10781000	9421100
L-Homocitrulline	451770	341870	276210	506170	255820	438200	407280	288220	437540	382370	227420	278740
L-Homocystine	111510	139340	188680	155440	131950	162470	166200	144850	9	9	9	9
L-Saccharopine	5669000	6314100	6015900	5506600	4773800	6529900	6011200	4542200	2004500	2505900	2296200	3532400
N,N-Dimethylglycine	7603100	6444800	6773500	6786100	6029300	8232900	7468500	6102400	4672500	6383500	4384200	5152100
N6-Acetyl-L-Lysine	562050	554900	433390	480320	396570	589010	521500	493060	3898500	3233700	2721900	3771400
N-Acetylcysteine	428670	458280	418730	369190	333500	396830	333150	318950	343900	388490	367390	352450
N-Acetyl-L-Glutamic Acid	405020	356500	483860	317980	490320	446170	458670	464000	2143600	2056400	1712200	2462500
N-Acetyl-L-Tyrosine	129710	137530	117230	140590	119850	136900	129190	133770	454130	515360	682090	408170
Gly-Leu	14742000	15031000	13394000	14864000	16606000	13198000	17101000	18191000	567420	321960	202830	409700
Nα-Acetyl-L-Arginine	233510	242650	244200	222230	227740	198470	189010	234210	219700	231860	241730	208680
Phe-Phe	80448	74049	76006	77714	70181	41931	85075	85303	10418	5368.1	5623.7	3964.1
S-(5-Adenosy)-L-Homocysteine	255150	238280	199420	320840	264820	217890	265620	278710	18579	15802	10095	19469
S-Sulfo-L-Cysteine	1078900	652210	608580	815600	373300	788510	831040	513480	6552.3	24026	61718	49903
Trans-4-Hydroxy-L-Proline	293940	267990	303460	296470	226950	292970	217040	243170	13685000	13698000	11413000	12685000
1,3-Dimethyluric Acid	83092	92899	86042	81230	92598	103840	147380	109510	9	9	9	9
5-Aminovaleric Acid	21340	15316	22737	12702	13509	16422	15353	12149	231850	231990	185840	228070
6-Aminocaproic Acid	2021600	2055200	2461800	2169800	2070100	1965600	2267300	2020900	436850	374000	496770	423280
Kinurenine	91798	80242	71866	82577	79345	83035	102040	74172	9	9	9	9
N'-Formylkynurenine	13906	31541	37376	26034	113300	99694	148950	95235	128980	132000	108320	181960
γ-Aminobutyric Acid	335120	317860	332480	338250	158750	190570	192060	126110	29980000	29601000	25079000	23991000
N-Acetylglycine	10191000	8199900	12113000	9900500	8371800	10758000	12473000	8839800	32396000	37635000	32157000	34183000
N-Acetylthreonine	32258	48008	38856	25324	40301	40424	41361	54526	61078	52317	48722	55646
L-Homoarginine	49358	23709	25682	47706	14561	24904	50087	38584	3091100	2752900	2424800	3474200
Sarcosine	904910	1086300	1280600	843770	1305900	890900	889550	1436700	1062000	1109000	997920	870100
Cys-Gly	9	9	9	9	9	9	9	9	1440300	2361500	1630300	996630
L-Norleucine	1166300	1028600	996180	856790	7987800	5511800	7525800	6240100	429630	564850	1024100	562310
N-Acetyl-L-Histidine	141450	226550	123720	156110	145050	148240	169320	114770	1134800	1658500	1561500	672750
Phe-Pro	2511200	3666500	3897600	3868500	3691600	3556000	3387200	3538400	663570	547450	784980	668640
L- Tyrosine methyl ester	9	9	9	9	9	9	9	9	624970	462920	677180	662720
Methylcysteine	9762500	12020000	11071000	9703000	8069600	7315300	8985500	6972000	25868000	20042000	16124000	19224000
Nα-Acetyl-L-glutamine	2020900	1582300	1625300	1917800	1621800	1782100	1985900	1423700	4957100	4246200	3317200	4034900
Gly-Phe	10753000	13897000	14958000	19078000	10724000	13550000	14895000	20522000	86292	14407	44193	39211
N-Methylalanine	7603100	6444800	6773500	6786100	6029300	8232900	7468500	6102400	4672500	6383500	4384200	5152100
N-Methyl-L-Glutamate	259220	265310	163870	144150	235640	325590	173910	122940	1851800	1714700	1580600	1423500
N-Methyl-D-Aspartic Acid	55877	43541	77048	39061	102910	136560	82591	61252	383860	342550	390160	445500
N-Alpha-Acetyl-L-Asparagine	13143000	15053000	16367000	13801000	17773000	15605000	14864000	17216000	280950	369570	284220	422330
N-Amidino-L-Aspartate	9	9	9	9	9	9	9	9	9	35997	9	9
L-Tryptophanamide	45387	50440	51033	32593	262550	202070	279890	229650	11439	24432	37226	19426
γ-L-Glutamate-Cysteine	9	9	9	9	9	9	9	9	703290	586300	604440	585480
Threoninyl-Phenylalanine	43808	77166	65282	90009	68776	88877	102050	138550	60742	66271	97055	86665
DL-O-tyrosine	97328000	100500000	102400000	94376000	89250000	93875000	95950000	93090000	36641000	47949000	47872000	47309000
(R)-(-)-2-phenylglycine	7225900	7531500	6720600	7580200	6956400	7080200	6866000	7345000	2937100	2906600	2994400	3420500
L-Isoleucine	120400000	124020000	109920000	124630000	58100000	100660000	87127000	126450000	14933000	12057000	13737000	22426000
N-Methyl-α-aminoisobutyric acid	11508000	12280000	12957000	10429000	12055000	12465000	13541000	12966000	26372000	32499000	15781000	25456000
Leu-Gly	578220	1513600	1527300	4713900	23078000	6797500	24720000	13273000	377640	143380	211640	291950
(2S, 3S) -3-methylphenylalanine	29916	47394	42515	55708	50153	33813	58133	29716	175970	165390	198010	154960
Shinorine	1577800	1696200	1412100	1744000	9	1651200	1226300	924160	707050	1019700	1179800	658380
mycosporine-glutaminol	9	9	9	9	9	9	9	9	1380900	1200700	1898000	1257700
Mycosporine glycine	139640	42142	70339	101230	38409	169230	117070	33427	930750	1250400	777080	1151700
Ala-Tyr	308770	324920	199550	262540	57619	89334	70382	81303	1011300	508710	479360	514150
Ureidosuccinic acid	125940	53258	90774	130650	432300	455170	439840	248010	244870	255550	176120	219500
Cis-4-Hydroxy-D-Proline	9	9	9	9	9	9	9	9	4515000	4671700	4252700	4765400
Leu-Val	52029000	58760000	50502000	69053000	98886000	92037000	139070000	116850000	172900	72252	94663	156990
Phe-Asn	35808	19665	20009	39346	106430	59817	130560	62402	12613	4468.5	9940.8	15738
Phe-Met	9	9	9	9	9	9	9	9	3355600	1084400	2077300	1607400
Glu-Met	408710	553110	479520	492260	447530	281630	456130	512220	13707000	4282800	7429800	5369100
Met-Glu	408710	553110	479520	492260	447530	281630	456130	512220	13707000	4282800	7429800	5369100
Phe-Val	709690	834060	912160	921750	1628300	1528900	2741100	2626200	314570	322280	218500	218120
NE,NE,NE-TRIMETHYLLYSINE	712040	695280	711530	726830	750600	685980	816880	692920	6135500	5180100	5423500	4854000
N,N-Dimethylarginine	954190	629710	933430	834570	1200300	1492000	1291800	933690	3136300	3222400	4381000	3352200
Glu-Leu-Arg	9	9	9	9	9	9	9	9	877640	971930	911130	946200
Leu-Val-Ser	1608600	1829200	1631900	1483400	1878600	1353100	2091800	2177800	1279000	980940	1343700	1369300
Phe -Glu	2012500	2266300	1878300	1866900	2404000	1516900	2218000	2618300	81263	78959	91196	122110
Leu-Ala-Val	223390	246340	187120	292540	418100	227510	557220	402140	9	9	9	9
Gly-Gly-Phe	426030	346240	377620	218230	203230	247050	222440	304710	104800	110170	74967	159280
Glu Glu Ile	1438900	1476600	1654000	1751700	1344900	1305600	1358300	1430100	182750	159380	185780	205050
Leu-Leu-Glu	56207	74259	47543	82508	147790	47902	223590	125680	36612	45994	30159	29262
Ile-Ile-Thr	9	9	9	9	9	9	9	783180	707350	377780	586540	515910
Val-Val-Val	9	9	9	9	9	9	9	9	310750	239930	268270	180830
Thr-Leu-Ile	41500	55407	39701	45669	65605	41577	73207	31079	111530	133210	134020	104400
Methyldopa	41564	35745	50267	65352	22536	44234	37768	14794	100270	84100	53817	146100
2-Phenylglycine	67008	41461	82755	59967	57642	31414	38592	37751	108940	67539	115710	132160
2,6-Diamino-5-hydroxyhexanoic acid	9	10649	9	9	12211	6439.2	7373.2	15784	1908900	1890000	2265800	2829400
Ala-Phe	751800	1154000	1060900	1373500	3363900	2310900	3414300	2756400	73337	21556	38660	35740
L-Allothreonine	824100	722770	886090	796420	468160	782890	481570	547800	93580	125290	110670	89044
Val-Tyr	207920	310160	118740	367550	1539100	771860	2188300	1449800	28602	19543	21767	11487
Ala-gln	40129	56154	108570	45237	107820	115730	100180	123910	21571	17253	23852	27684
L-Methionine sulfoxide	1219700	1009800	896050	967890	446070	979020	1173600	514450	59332	131050	53383	106120
L-Norvaline	54210000	55213000	57986000	47669000	46699000	46279000	48231000	52430000	7523900	8349000	9679200	8547100
Arg-Leu	230050	216820	162080	257970	410460	264750	342800	227560	1222500	921770	919750	1266400
Asp-Tyr	9	9360	6293.9	9	27742	37925	9	9	123680	83491	95258	179610
Gln-Phe	28649000	28702000	26979000	30465000	27049000	22852000	30252000	28215000	465650	558620	732520	665320
Glu-Leu	691850	782330	819240	846620	635470	524640	796650	787360	49105000	22408000	28877000	25181000
Glu-Tyr	156340	174020	140890	87411	151630	106260	131370	104160	9772500	5111600	8380800	8356100
Gly-His	155030	97757	113120	135130	103290	138180	80389	107540	468990	478230	610560	513770
Gly-Tyr	8597000	9045000	8930700	8774300	9782200	7956100	11581000	10604000	37309	52586	30115	37517
His-Leu	3974400	6158700	3958300	6164000	4834700	5060500	7253800	5465000	111190	200980	186420	131120
Ile-Lys	8942400	9200700	6681400	9134300	14586000	13215000	23770000	20384000	2260700	1994000	2189000	2686100
Ile-Met	9	9	9	9	9	9	9	9	671710	327280	418650	356860
Leu-Pro-Tyr	18620000	17254000	16298000	20376000	15096000	14459000	14726000	17201000	69396	54946	54605	58175
Phe-Leu	1151700	1221000	1145200	1253900	1324000	898090	1239100	1355300	18558	14904	20527	19939
Pro-His	26635000	26654000	28020000	30869000	27111000	22677000	29804000	27425000	1358900	1053400	1155400	1421200
Pro-Ile	1663200	1673800	1823200	2047700	1916600	1486000	1819700	1576400	243880	242920	302760	298690
Pro-Val	4642800	4838600	5400100	4653200	5924700	4786400	5725300	4190100	227350	256050	279090	340560
Ser-Leu	466140	507590	562660	623560	544750	428090	453990	504650	8885300	7799100	8847100	10061000
Ser-Phe	646090	488380	465590	572950	405430	337600	550840	690440	94729	137630	124330	176800
Tyr-Leu	390840	666040	530060	660640	3228100	1398200	3885400	2718100	131880	81583	46835	89746
Tyr-Phe	1491300	1369600	1444700	1727000	1523800	1166300	1579000	1742700	26105	26004	28463	22723
N(Alpha)-Acetyl-Epsilon-(2-Propenal)Lysine	11676000	14125000	14167000	11307000	15186000	11496000	14193000	14560000	972660	892650	1149400	1295200
N-(1-Deoxy-1-fructosyl)phenylalanine	49922	45878	66607	35509	51552	43426	55214	62126	60222	71070	37969	44808
N-Acetyl-L-phenylalanine	768350	790620	801880	862720	794130	597220	813860	855290	408940	551740	639570	508730
Cyclo(Pro-Leu)	7047700	7275600	7048200	7952300	6950100	6280900	7980100	8014500	419750	332220	491170	414520
Cyclo(Phe-Glu)	566000	574600	552520	484650	565810	511670	621200	613130	59352	103720	110160	95479
Cyclo(Pro-Glu)	748040	866380	892630	941410	1050000	679780	969990	886860	261160	188250	291010	215570
Cyclo(Pro-Phe)	10079000	10600000	10483000	11926000	10679000	9118200	11057000	11884000	490040	500610	536560	588790
Cyclo(Pro-Pro)	980400	962640	998340	838890	949320	858510	1023900	795620	699120	682140	701650	749240
Cyclo(Pro-Val)	10098000	13282000	13076000	12623000	13840000	13086000	13349000	14594000	768890	682140	723340	800570
Cyclo(Ser-Pro)	11075000	11818000	11702000	13896000	15199000	11672000	12191000	10394000	1030200	1168600	1158600	1168500
Cyclo(Tyr-Ala)	2755600	2353400	2708100	2720300	2633300	2626400	2596300	2755300	152800	163920	161300	142490
Cyclo(Tyr-Leu)	1210900	1076500	965210	1375300	1376000	991420	1300300	1354000	28291	26201	27284	25240
Cyclo(Val-Ala)	1027600	879580	984740	1065600	1101500	1061100	1028400	1043000	181760	169650	163710	163320
Cyclopentylglycine	9	9	9	9	9	9	9	9	133940	95001	87229	120560
Ile-Asp	10563	21226	26784	5355.4	9	9	9	9	536680	588400	465580	637450
L-Aspartic acid-O-diglucoside	15982	29049	23615	13344	102510	85999	77308	128040	7979	13387	35685	9379.7
Leu-Leu	218520	260090	314310	189750	147890	84428	269610	124910	146130	104580	100370	104620
N-MethyTrans-4-Hydroxy-Proline	33827	25432	40753	19789	13338	21453	24591	24166	60998	59388	37302	51675
O-Acetyl-L-serine	55877	43541	77048	39061	102910	136560	82591	61252	383860	342550	390160	445500
Pro-Leu	9912300	10331000	9770100	12102000	11012000	12406000	18938000	17108000	656020	644380	950280	825070
Ser-Ile	523400	632370	524150	610330	522820	388330	478380	520140	8962700	7906600	8863500	10016000
S-(Methyl)glutathione	35948	41682	39105	20938	27127	20954	31987	41950	336590	109760	168440	135590
S-Allyl-L-cysteine	7049.9	2810.7	3760.2	9	9	9	9	9	351470	310040	297430	230060
L-Lysine-Butanoic Acid	15011000	13973000	15747000	12738000	13899000	15663000	16552000	13718000	34662000	45196000	22791000	35092000
L-Methionine methyl ester	9	9	9	9	9	9	9	9	209460	169630	201780	263840
D-Proline betaine	15283	31059	10359	16791	9	25020	9	12213	41686	67729	48348	65275
Glu-Pro	1580300	1500100	1582200	1618100	1818300	1542200	1534200	1264900	364520	247100	414950	510900
His-Val	2622000	2418700	2391300	2743700	2663100	2176900	2901800	2419900	313160	311960	323640	371510
N-Formylglycine	8268400	7804900	9231900	8057500	7897100	8794600	8542700	8686300	3951800	4878900	3104400	4448700
2,3-Diaminopropionic acid	9	9	9	9	9	9	9	9	185150	223080	107690	156560
D-Pyroglutamic acid	3461900	3360200	3770000	2943500	4963100	3509300	4151200	2612300	709640	1110600	551670	889270
D-Ornithine	2816900	2792200	3051600	2992100	2983700	3476800	3799700	3135800	1801400	1291500	1435700	1662500
N-Acetyl-Asp-Glu	9	9	9	9	9	9	9	9	329230	297950	259810	390960

## Sheet: Supplementary File 1d
	HK-K12				HK-yfbR				Live-K12
Compounds	HK1	HK2	HK3	HK4	HY1	HY2	HY3	HY4	Con1	Con2	Con3	Con4
Thiamine Pyrophosphate（TPP）	9	5191	5238	9	9	9	9	9	47336	77767	34573	36839
Orotic Acid	66875	62959	55676	83245	41826	47114	56720	40517	2094500	1680600	1625600	2162600
Pantothenate	1754600	1895200	1668000	1992800	1500500	1362700	1524200	1832500	3918200	3544900	3251700	3487900
D-Calcium Pantothenate	10634	14425	8446.3	17153	6648	6059.5	8446.2	11855	70687	77128	73491	81875
6-Hydroxynicotinic Acid	40320	41944	14047	27886	35895	21697	24349	36721	9	9233.5	18753	10000
Biotin	1720400	2061000	1977300	1827700	2201800	1879800	1945900	2082700	101140	100680	85886	80671
Pyridoxine	499550	424720	447880	405020	705310	373960	575700	553270	2098000	1756400	1597000	1569900
Nicotinamide	40181000	55667000	29084000	41684000	12838000	13659000	12315000	13786000	412720	849230	872440	831930
Nicotinic Acid	3746900	4323400	3855100	4198000	2634500	3333300	3140500	3593100	7168100	6988200	12261000	11472000
Riboflavin	11642000	11529000	6920800	12478000	5415200	5641500	6468100	5582900	10724000	12952000	10677000	12914000
Trigonelline	158970	159290	86258	152180	160810	212810	171280	113540	83494	86815	57585	126400
Pantetheine	133240000	134900000	124600000	133850000	140260000	129000000	126780000	119590000	134440000	136540000	136490000	135280000
Pyridoxine 5'-Phosphate	16775	16607	23863	29830	9816.3	6723.2	19902	15851	713100	469230	497440	387750
Thiamine	181420	165730	178700	228250	159880	247180	265030	189450	104130	57670	50577	75255
3'-Dephosphocoenzyme A	9	9	9	9	9	9	9	9	8395100	2625800	4014600	5648400
Pantothenol	9	9	9	9	9	9	9	9	53605	231640	53294	66430
(E)-Guggulsterone	625270	535440	466060	682180	724690	776790	955110	916910	34372	38776	20770	43971
(Z)-Guggulsterone	379000	320420	287510	323300	473830	495120	626080	683970	48932	42292	30388	72396
Methyl nicotinic acid	9	9	9	9	9	9	9	9	539050	400300	821820	512170

## Sheet: Supplementary File 1e
	HK-K12				HK-yfbR				Live-K12
Compounds	HK1	HK2	HK3	HK4	HY1	HY2	HY3	HY4	Con1	Con2	Con3	Con4
Dulcitol	14713	19149	32262	14065	31329	29611	41058	28665	729470	995480	1200800	1040400
1,5-Anhydro-D-Glucitol	9	9	9	9	9	9	9	9	22281	23042	27765	29309
D-Arabitol	29699	13926	17933	13382	7561.1	12902	10688	7784.9	101280	146900	86571	82725
D-Glucose	290380	300670	296260	256600	223980	243770	247680	268120	846390	863220	691170	760610
D-Melezitose	9	9	9	9	9	9	9	4134.4	155300	153110	101300	110410
D-Trehalose	5445.4	4758.9	10206	8699	286830	212450	260740	276190	266990	189960	123960	139020
D-Glucose 6-Phosphate	120780	120750	132370	95965	120070	201060	154280	158490	42854000	27432000	26454000	44390000
N-Acetyl-D-Glucosamine	182570	164800	185880	232810	275030	238080	266510	229690	270580	266430	241080	238100
D-Glucoronic Acid	9	9	9	9	9	9	9	9	67327	58813	70872	66774
D-Gluconic Acid	5533	5837.4	6370.7	4361.9	3916.6	5208.2	5203.5	6653.7	856830	1026000	712530	745080
L-Gulonolactone	14285	14143	11333	5526.5	7766.9	16721	12517	2719.7	32167	25727	28983	20564
D-Sedoheptuiose 7-Phosphate	32178	36943	34077	34361	42934	51613	58730	34689	58164	52687	62485	53230
D-Fructose 6-Phosphate-Disodium Salt	82083	69612	52360	50754	81893	123840	85955	93197	15970000	10637000	10289000	17228000
D-Fructose-1,6-Biphosphate-Trisodium Salt	86612	94246	48977	53073	41886	63400	52916	71720	4282400	3104600	1422500	5663400
Ribulose-5-Phosphate	1263000	1477900	1153600	1111600	299980	544370	366190	322380	25069000	15444000	8513000	11795000
2-Deoxyribose 1-Phosphate	15302	25593	9	9	14619	13293	16056	13346	127930	147810	186450	144670
N-Acetylglucosamine 1-Phosphate	9	9	9	9	9	9	9	9	233530	396380	301020	280960
L-Erythrulose	204500	205190	198460	238720	203920	178360	237880	225420	28660	16459	25959	16461
D-Glucosamine 6-Phosphate	10174	11462	7982.8	10816	9	9987.7	11154	10519	84473	81761	79987	107160
Stachyose	9	9	9	9	9	9	9	9	75021	121420	36150	62071
UDP-D-galactose	447930	541240	389330	660440	561800	709570	634580	688350	31493000	25587000	20980000	18045000
1,6-anhydro-β-D-glucose	12205	17170	11069	5666.9	4428.8	8841.7	7632.8	7828.1	189870	185490	159070	173760
Sorbitol 6-phosphate	9	9	9	9	9	9	9	9	11830000	9228800	11673000	17444000
D-Mannitol 1-phosphate	82436	52360	92211	67697	297180	600690	306460	561200	68821000	57117000	60717000	83360000
D-(+)-Cellobiose	117420	117290	125560	139210	137490	115100	143910	132940	589660	949530	1305400	1182700
D-Galacturonic Acid	9	9	9	9	9	9	9	9	67327	58813	70872	66774
GalactinolHydrate	117420	117290	125560	139210	137490	115100	143910	132940	589660	949530	1305400	1182700
Glycogen	9	9	9	9	9	9	9	9	75021	121420	36150	62071
Sucrose 6′-monophosphate	48020	9	9	9	9	9	9	9	417170	393120	456140	375560
D-Arabinose 5-phosphate	1386400	1542400	1230200	1178800	267720	573320	413060	402540	29050000	16189000	9303400	13796000
UDP-xylose	9	9	9	9	9	9	9	9	103120	97346	83119	76020
D-Glucose 1,6-bisphosphate	6512.5	8480.1	8862	14809	9109.4	6012.2	8137.5	10829	375000	239620	207840	537620
D-Mannitol	14246	11022	16484	11178	7867.3	12548	24193	17099	1587800	1814800	827700	2419200
D-Fructose	781520	848180	982710	612560	590840	562050	550960	324850	3259000	4748600	3875900	2937900
Lactose	153480	134700	136440	208120	2820900	2089000	3532900	1993400	1490400	655060	1014000	944030
D-Glucono-1,5-Lactone	290410	310930	301290	215340	277620	221430	240240	273770	162930	184750	285620	242050
D-(+)-sucrose	153480	134700	136440	208120	2820900	2089000	3532900	1993400	1490400	655060	1014000	944030
2,4-diacetamino-2,4,6-triphenoxy-D-mannopyranose	9	9	9	9	9	9	9	9	544820	305360	344090	510860
D-Glucosaminic acid	124040	58467	100190	42988	26608	67246	94607	102260	36222	20526	25479	26887
alpha-D-Glucopyranoside, beta-D-fructofuranosyl	2569.4	2252.5	5898.5	9	20475	16065	14971	17784	247960	180640	57042	160520
Melibiose	179820	114950	142780	140490	89608	147580	104680	85168	77184	73656	46154	87748

## Sheet: Supplementary File 1f
	HK-K12				HK-yfbR				Live-K12				LB
Compounds	HK1	HK2	HK3	HK4	HY1	HY2	HY3	HY4	Con1	Con2	Con3	Con4	LB1	LB2	LB3	LB4
Prilocaine hydrochloride	56323000	53600000	53643000	51737000	56405000	40983000	60703000	57109000	938110	783820	981750	1069700	3948900	1722300	3713200	1790100
Sodium cholate	9	9	9	9	9	9	9	9	54526	38124	45024	50115	28316	34070	34816	17858
Sodium Demethylcantharidate	179580	291100	239030	282580	153040	190900	157790	195390	4424800	2732900	1101100	3025300	257990	432740	342290	283560
D-Phenylalanine	19653000	20828000	20462000	22818000	19412000	19286000	21264000	22836000	8718200	8011100	7859600	8198600	13875000	18752000	13559000	16208000
Lidocaine hydrochloride	8885600	12166000	7825600	11682000	20812000	11431000	22154000	20148000	473580	436040	316950	510820	811840	858430	1843100	818610
3,4-Diaminopyridine	2750700	1554800	1137800	2634300	1235200	2939900	2142900	1223300	2648500	2672000	1705000	2695800	1542100	1315300	2579200	3186700
VitaMin U	247060	261620	333640	283240	294560	244680	233280	266110	489480	438620	766550	578890	720370	981640	686440	656630
L-Prolyl-L-Phenylalanine	5512500	4650000	4438600	6396400	5656700	4717300	6732700	7236600	86137	66859	90725	74544	2627600	3557700	3323200	2126900
Aspartyl valine	207850	144780	214560	214890	163630	204600	133840	170820	41922	47876	25988	67971	63595	36056	56196	64335
(+/-)-High Proline	641920	667040	440400	529020	614410	430240	712350	699300	76014	45014	53603	53906	375470	558970	545440	414300
Proline Hydroxyproline	17596000	18093000	18021000	19639000	18519000	18501000	21048000	19533000	326970	372880	554890	596540	9654500	9185400	12519000	11101000
DL-Arginine	101930000	127860000	119540000	111940000	137590000	103290000	107740000	125440000	2206300	2069000	3157100	2645500	2281900	3075000	2098800	2515700
Glu-Phe	92555	103580	79476	103220	60852	42874	61983	64662	13190000	5085100	7165900	5927700	1409800	3868300	1230900	1605100
Glu-Trp	1751500	1982300	1900400	2330700	2214300	1492000	2148200	2243200	71991	57531	100440	85440	1264700	1953900	1751100	1204800
1-Oleoyl-sn-glycero-3-phosphocholine	9685200	6024200	6982100	11121000	26402000	17017000	28614000	24964000	621040	346860	415900	357440	83234	166770	227490	99144
Confertifoline	28187	29508	32904	27569	30890	35668	37508	35121	35125	28783	29517	29923	34237	30414	34008	29271
Maritimetin	333270	339740	351410	353410	357360	363820	363780	372640	394740	375640	382700	405400	344030	351900	360520	337310
Isothankunic acid	19572	15825	14059	15845	77660	52038	74145	62323	17961	19034	18052	23033	13475	16544	11490	10133
Nordihydrocapsiate	1518900	1328900	1637200	1163700	949350	1039000	1248100	853280	1235000	787240	1068000	1153600	745630	903800	1004100	1012100
[6]-Shogaol	178380	75051	39191	261180	23439	49545	370400	122480	22720	21810	21906	22114	20915	26357	21946	14320
9,10,18-Trihydroxystearic acid	41540	35082	51837	47870	122990	79554	99764	122450	24034	19974	21277	19293	22822	32137	17328	27869
Nordihydrocapsaicin	1984100	2050700	2023700	2150800	2084900	2052000	1999300	2031800	2014700	2113500	2213100	2234800	2043900	2320400	2380700	2113800
Trehalose 6-phosphate	219350	326530	188630	235980	52782	54759	52480	62707	511820	332270	370180	350150	234740	154760	164850	101670
1,7-Dihydroxyxanthone	39785	26888	41532	45339	150070	98954	212010	165410	20317	19922	14702	15970	105810	126700	111960	87352
Moracin M	25876000	24595000	23622000	22636000	19076000	21393000	21049000	19614000	4007900	5500300	4520000	4555000	20769000	20742000	22138000	22822000
Perlolyrine	1028000	752200	1134800	1251000	3153900	2208500	2985400	3249000	180410	156240	185820	131680	150400	178440	195950	134800
6-Deoxyfagomine	13738000	13419000	14025000	14809000	5814700	11129000	10490000	12137000	2250000	1386500	1761900	1979500	21842000	22921000	21289000	19047000
12-Oxo-10E-Dodecenoic Acid	65363	59291	54886	70588	59821	43022	62322	69511	3673.6	5348.4	4223.4	5405.6	68261	86992	72828	56450
L-Threonine	1036300	845310	1181500	1001900	540020	968240	467880	635470	42977	63834	45541	49885	136630	109260	177670	156190
L-Aspartic Acid	4894900	5039500	5619800	4214200	2778600	3844500	2489300	2783200	4252300	4126800	3554200	4025800	71241000	69637000	69168000	74055000
3-N-Methyl-L-Histidine	54157	65014	42867	45059	9	9	9	9	214440	217320	153850	199310	1646300	2003800	2147200	2289300
4-Hydroxy-glutamic acid	33181	30265	38470	41055	9	9	72193	58372	70633	59513	29982	87459	216640	352260	273230	332970
Allantoin	563630	640640	503900	477990	388860	337280	443600	490880	3581600	3780900	4773100	3503500	912290	943190	1680500	1409600
Ala-Ala	223040	312620	225330	290090	83531	87981	78488	88708	360860	492320	241110	148990	410810	435420	423140	508550
N-Acetylaspartate	67698	101640	68639	68592	78092	58973	81412	65279	46546	27237	33441	56869	2349600	2959700	2609700	2510700
N-Acetyl-L-Leucine	1624100	1660300	1527100	1709200	1392000	1188900	1400300	1530700	1044500	1609200	1183100	735800	7772100	8846000	6205900	7787200
N-Phenylacetylglycine	119650	101940	109050	113510	113150	91887	114630	118720	23586	15296	15769	8137	105470	138530	132590	93195
N-Propionylglycine	3321000	2993000	3020200	3367100	2998600	3231600	3067700	3274400	577850	494700	551760	535140	3176000	3385700	2952300	3081700
O-Phospho-L-Serine	9	9	19760	34758	9	9	9	16202	448340	242730	119140	319510	9	9	9	9
Terephthalic Acid	1344500	1286300	1388500	1287200	1429400	1497300	1229100	1459900	1410900	1516000	1166500	1075300	761880	652410	855920	1069100
2-Picolinic Acid	1934300	1730900	1741300	2167900	1445500	1544700	1458000	1596700	2406000	2358000	3771500	2494600	12390000	18208000	11123000	11875000
Dulcitol	14713	19149	32262	14065	31329	29611	41058	28665	729470	995480	1200800	1040400	36296	16234	30551	19791
4-Hydroxy-3-methoxybenzaldehyde	66107	44869	55211	56311	61199	50833	64709	74041	32987	36201	35814	21023	21408	18637	25557	26192
Thiamine Pyrophosphate（TPP）	9	5191	5238	9	9	9	9	9	47336	77767	34573	36839	9	9	9	9
Xanthine	3612400	1689200	2435000	4378800	5429400	6942400	5998300	6507100	7780900	3599100	8267600	4328900	24398000	31762000	17147000	30110000
5-Hydroxymethyluracil	137160	169260	153690	131210	154530	132460	193470	152080	45984	78622	66110	46031	349120	434600	443630	491950
7-Methylxanthine	7481.3	2378.6	5772.9	6376.3	2544.2	9	9	9	54745	30651	49660	25731	26540	39828	25348	43063
Adenosine 5'-Monophosphate	303960	561620	174360	558160	56502	59897	38635	36729	1000500	674050	730700	655280	489830	447890	515650	401960
Deoxyguanosine	53101	51355	33344	59202	16313	27623	12347	20181	57268	43501	39766	41400	45728	74904	94198	64945
Flavin Adenine Dinucleotide(FAD)	101290	115040	58886	111780	21412	17503	17227	26730	715630	606390	576770	675970	1062800	1489000	1414000	1039600
Inosine 5'-monophosphate	19890	36851	17673	38636	9	9	9	9	74827	53240	59228	59513	41817	34306	43706	27254
Thymidine	5887.9	7828.2	3423.8	3886.5	9	9	9	9	9009.6	9191.1	8955.1	6721.9	6637.3	12940	7803.7	6749.3
Uridine	118200	113050	89582	117790	50989	45947	55566	68169	214170	260600	239110	205310	459490	541160	418000	443820
Pyridoxal 5'-Phosphate	9	9	9	9	9	9	9	9	2457600	1967000	1937200	2602000	1264700	2490600	2140600	1945600
Citric Acid	2375200	2487800	2322000	2495400	2409800	2542900	2590600	2701500	87750	78960	55999	65407	70625	122180	66811	83271
Succinic Acid	1122500	1162500	1118100	1103200	911780	852690	920660	1004400	770990	396830	385640	756310	3034600	2791200	3363200	2544000
Citramalic Acid	68100	63865	62323	78599	60428	51173	45389	64997	78520	43098	45147	59776	250760	239700	204950	148490
Tryptamine	99829	85400	96221	81161	389340	289220	391450	415720	40578	49718	64093	62037	171890	149040	171480	142670
1,5-Anhydro-D-Glucitol	9	9	9	9	9	9	9	9	22281	23042	27765	29309	18894	17843	18378	28266
D-Arabitol	29699	13926	17933	13382	7561.1	12902	10688	7784.9	101280	146900	86571	82725	220000	276990	286220	231690
D-Glucose	290380	300670	296260	256600	223980	243770	247680	268120	846390	863220	691170	760610	532640	664440	620070	521500
D-Melezitose	9	9	9	9	9	9	9	4134.4	155300	153110	101300	110410	9	9	9	9
D-Trehalose	5445.4	4758.9	10206	8699	286830	212450	260740	276190	266990	189960	123960	139020	21532	18244	16307	15764
D-Erythronolactone	31594	33662	36701	32276	45627	42523	35449	29175	30001	18618	22879	15879	35857	26277	33043	44843
D-Glucose 6-Phosphate	120780	120750	132370	95965	120070	201060	154280	158490	42854000	27432000	26454000	44390000	2036100	2361900	1200900	1719000
N-Acetyl-D-Glucosamine	182570	164800	185880	232810	275030	238080	266510	229690	270580	266430	241080	238100	268930	297070	225810	260230
D-Glucoronic Acid	9	9	9	9	9	9	9	9	67327	58813	70872	66774	31936	9	27980	28412
D-Gluconic Acid	5533	5837.4	6370.7	4361.9	3916.6	5208.2	5203.5	6653.7	856830	1026000	712530	745080	14011	15269	28997	12322
L-Gulonolactone	14285	14143	11333	5526.5	7766.9	16721	12517	2719.7	32167	25727	28983	20564	173920	147700	71923	220350
Orotic Acid	66875	62959	55676	83245	41826	47114	56720	40517	2094500	1680600	1625600	2162600	11680000	8836200	7682400	6803800
Pantothenate	1754600	1895200	1668000	1992800	1500500	1362700	1524200	1832500	3918200	3544900	3251700	3487900	17458000	21192000	21577000	18036000
Indole-3-Carboxaldehyde	221220	182770	200490	219590	239080	217510	299300	291140	8018.8	9764.3	7632.1	8131.3	107430	120940	113340	83450
2-Aminoethanesulfonic Acid	92024	48442	79739	90396	47072	45246	115050	115930	89911	107520	88769	83991	36851	28423	33347	25292
2-Hydroxybutanoic Acid	117420	117290	125560	139210	137490	115100	143910	132940	589660	949530	1305400	1182700	1839700	1473100	1013600	1317100
2-Hydroxyisocaproic Acid	67027	71090	57779	79103	33596	26001	30074	35194	43677	38937	17015	55580	428470	541350	516680	395770
2-Methylsuccinic Acid	9779.3	11594	12963	10777	12000	7951.9	9240.8	16763	384180	415300	404190	435070	5071700	6765600	6624700	6435500
3-Hydroxypropanoic Acid	19533	20520	24371	25312	36132	43161	42849	38170	235780	86532	121720	378240	12722	9	16550	4551.3
Adipic Acid	41420	29312	38214	21701	25677	20522	40817	63869	54177	61418	48432	52490	39211	37912	37725	33279
Azelaic Acid	757780	735460	796550	755890	729850	730770	848980	765930	1106300	1131300	1018100	1072900	840600	878710	805390	842630
Creatine	9	9	9	9	9	9	9	9	45834	31586	36183	43362	723860	781240	680230	561190
Glutaric Acid	9779.3	11594	12963	10777	12000	7951.9	9240.8	16763	384180	415300	404190	435070	5071700	6765600	6624700	6435500
Kynurenic Acid	187190	198860	171660	213450	168980	127500	179030	186300	91981	91907	84009	98445	14157000	17624000	13371000	12108000
L-Lactic Acid	19533	20520	24371	25312	36132	43161	42849	38170	235780	86532	121720	378240	12722	9	16550	4551.3
Malonicacid	117420	117290	125560	139210	137490	115100	143910	132940	589660	949530	1305400	1182700	1839700	1473100	1013600	1317100
Phenyllactate(Pla)	526670	561510	451300	548050	168070	156890	165660	184600	2325300	2386700	2201600	2039100	6364200	8726000	5193500	5417400
Pyrrole-2-Carboxylic Acid	12903	18250	14857	17145	17136	14652	16878	18106	31914	29516	32644	29396	20598	21011	20748	18107
Shikimic Acid	58009	58695	63642	65598	65737	60859	62765	83017	9	9	9	9	33067	32855	25202	25605
Subericacid	38436	34749	34918	39762	41769	45501	36184	38648	67038	68827	65699	57933	75996	57288	60267	63626
O-Phosphorylethanolamine	400180	464060	377970	443620	389910	494420	474310	481380	87364	85662	52016	73775	49756	38822	39972	71317
LPS(22:6/0:0)	97689	100670	107970	88406	97067	137160	101970	122650	109880	114130	116990	116780	119250	133440	131850	117270
LPE(18:1/0:0)	282540	252950	236750	338540	1312500	1385000	1504000	1795000	19294	12374	9284.6	13691	228280	285840	232030	192660
LPE(18:0/0:0)	502550	459090	410080	442350	1345800	1382900	1614000	1786100	39698	24558	25678	32507	37164	57891	48030	45319
LPE(16:0/0:0)	410340	367820	329740	421980	599060	656120	776790	848440	35320	22809	23643	29999	94973	127410	108660	88722
LPE(14:0/0:0)	588280	519430	474800	664180	1105300	1003200	1272100	1303600	18871	8717.2	12584	14837	41795	64239	51390	44122
9,10-DiHOME	20317	12681	14960	15552	16253	16509	22632	22058	11326	9682.2	7448.9	7363.3	5954.4	8272.6	8356.6	4594.9
FFA(16:1)	5651600	2460000	2615300	6071100	10158000	9114800	6937000	9751800	141590	67870	24926	44187	485910	1150300	571680	401770
FFA(16:0)	12597000	20860000	19489000	9524600	16006000	20216000	22533000	24199000	2530100	3780800	7584600	5598200	1511600	9546700	6146600	4985400
FFA(18:2)	372190	178350	157050	412770	877650	743760	590440	775680	4233.9	3854	6653.6	7084	10017	6131.8	7727.2	4783.3
FFA(12:0)	1279900	953250	1201900	1297800	1442700	1412900	1536800	1772800	74942	71063	66105	84188	71549	88317	65425	68120
DHA	541140	448190	453140	563760	340290	353530	375290	499380	24726	19514	22058	17805	21470	31402	22648	10170
Urocanic Acid	13927	12680	12501	14780	13526	9573.3	25068	9900	127610	119190	119070	131890	102870	132310	95103	114220
4-Hydroxybenzaldehyde	635060	629900	603290	704410	1332900	1287800	1595600	1569400	122010	115820	106690	112500	175780	304250	209750	222130
2-(Formylamino)Benzoic Acid	396540	358130	377210	382290	386200	400340	540790	499560	225490	254730	227310	292650	1097800	1443400	1090700	1050300
(Rs)-Mevalonic Acid	78600	70091	85158	85918	86119	76483	83452	92555	9	9	9	9	63657	61944	55657	52381
Uridine 5-Monophosphate	158130	224110	114820	170460	26926	29184	25225	32128	536850	295210	310110	193790	254330	155790	198960	139930
5-Hydroxyhexanoic Acid	3384600	3515800	2892800	3481500	1753100	1592600	1783600	1855000	10776000	9582700	8705700	7550300	41250000	60356000	39661000	39609000
Β-Pseudouridine	838240	814740	574830	850660	276640	291250	291920	342580	1528400	1677900	1578700	1785600	2357100	2602200	2190600	2545000
Orotidine	9	9	9	9	9	9	9	9	39830	40022	44146	38898	325780	321520	336390	207450
D-Sedoheptuiose 7-Phosphate	32178	36943	34077	34361	42934	51613	58730	34689	58164	52687	62485	53230	38462	24511	35871	33694
D-Fructose 6-Phosphate-Disodium Salt	82083	69612	52360	50754	81893	123840	85955	93197	15970000	10637000	10289000	17228000	893290	1124700	550430	708580
Aminomalonic Acid	3931900	4048300	3898900	3991300	3019500	3015500	3303100	3557100	2642900	1494900	1366800	2828400	11610000	10242000	11870000	8847800
Dl-Glyceraldehyde3-Phosphate	9	9	9	9	9	9	9	9	6015100	3780400	1190600	8415900	9	65773	95978	62636
D-Fructose-1,6-Biphosphate-Trisodium Salt	86612	94246	48977	53073	41886	63400	52916	71720	4282400	3104600	1422500	5663400	46525	21977	37579	37145
8,15-Dihete	2933800	921640	794320	3981400	3880400	3244200	2085600	3066600	115970	45229	9051.5	32697	395910	932630	453390	260020
N-Acetylmethionine	31331	30692	29807	29411	23800	20294	25533	30981	50788	98013	79095	43213	385280	355380	265840	302010
Ribulose-5-Phosphate	1263000	1477900	1153600	1111600	299980	544370	366190	322380	25069000	15444000	8513000	11795000	1363800	1762900	1285500	1238200
Argininosuccinic acid	351290	487680	307170	241600	112420	117460	98928	120990	12915000	10421000	6923400	10580000	1054900	984310	1029800	1122900
2-Deoxyribose 1-Phosphate	15302	25593	9	9	14619	13293	16056	13346	127930	147810	186450	144670	612750	578760	1047300	486100
N-Acetylglucosamine 1-Phosphate	9	9	9	9	9	9	9	9	233530	396380	301020	280960	55672	9	9	72301
Indole-3-lactic acid	12052	8087.5	7900.1	12343	9	9	9	9	9	9	5739.9	5624.4	64185	66613	63662	30883
Xanthosine	64498	49439	60031	65074	267590	182740	249350	335980	1036900	1016600	1589400	1487000	11157000	18713000	12356000	7400600
ADP-ribose	3486000	4354400	2710100	3755600	656960	747660	560830	687820	1148900	778330	1029500	960310	649290	509300	559850	583380
UDP-glucose	447930	541240	389330	660440	561800	709570	634580	688350	31493000	25587000	20980000	18045000	5801400	3677800	4570800	4274300
2-(4-Hydroxyphenyl)ethanol	433760	324720	418920	357860	320730	328540	417570	449910	850200	997600	746630	964330	2709100	3731100	3093000	2504600
Hydroxyphenyllactic acid	106380	133720	84884	130700	38645	25741	41518	47998	387710	400310	388560	373020	3118100	5094600	3198100	3391000
Indole-3-carbinol	50438	50493	48918	55577	40973	42349	56577	53360	19259	16333	14742	20162	114390	124670	104380	106810
L-Erythrulose	204500	205190	198460	238720	203920	178360	237880	225420	28660	16459	25959	16461	212740	257550	232940	220320
N-lactoyl-phenylalanine	441190	427950	419090	467560	499920	380620	496990	530290	18219	16528	19275	25479	135920	81529	112670	54854
N-Acetyl-L-alanine	560860	496130	548120	532880	575520	532240	590130	606000	47332	68449	58778	52631	575440	641270	440910	581780
Glycerophosphoric acid	35837000	37883000	32266000	27688000	14533000	30450000	15680000	17730000	43703000	39915000	29458000	24175000	5834400	5651500	4402800	5961000
D-Malic acid	82237	119620	52144	121510	30976	17796	35577	36081	710570	199970	275920	540260	1279300	2947500	1099700	2480100
deoxyguanosine 5'-monophosphate(dGMP)	303960	561620	174360	558160	56502	59897	38635	36729	1000500	674050	730700	655280	489830	447890	515650	401960
Tetradecanedioic acid	24874	21989	25555	19549	27204	24311	23609	24259	32337	35744	33773	34754	26154	27225	30871	23346
Carbamoyl phosphate	806690	755270	685760	905610	1267500	1460300	1344200	1468600	128760	132050	92320	111870	77287	108300	63307	123490
Porphobilinogen	2864200	2712400	2909900	2345900	2236600	2625900	2559200	2542500	2813400	3948100	3920800	3476700	3014200	2870500	2387200	2382800
5'-Adenylyl sulfate(APS)	14911	17082	12025	19313	9	9	9	9	623040	199020	218010	447100	86433	188680	301740	166480
N-Oleoyl Glycine	46671	40047	49348	43375	39198	37130	40880	39546	45955	45943	48582	43298	46854	50532	54939	49698
Ginkgoic acid	47762	52726	36963	36779	118140	74855	136580	117130	76477	64135	28275	57990	48269	41833	38391	38038
Anthranilic acid	96287	97685	75912	98440	113750	98982	126980	133350	9	9	9	9	121210	165670	138320	109440
Indoleacetaldehyde	873570	680410	770060	786020	3313400	2434800	3333500	3462900	365300	423080	542000	467890	1288000	1381800	1465800	1222800
Hexadecanedioic acid	113630	100540	94398	105270	63800	63168	66622	76603	49848	57069	53931	49962	59310	58470	61895	50244
Ethylsalicylate	5591800	5177600	5703300	4650800	4435900	4751000	4763800	4828000	5611400	7621600	6597100	6518700	5763900	5403200	4484000	5174500
Octadecanamide	31898	36626	31933	27902	25204	18587	23676	22391	46100	47499	34606	29104	40936	29284	36683	38484
2,5-Furandicarboxylicacid	3704700	3403300	4069000	3821000	3255000	3648100	3874700	3708900	2890700	3377100	2977800	3406500	3623200	3351200	3242000	3655200
4-Hydroxybenzyl alcohol	24956	25068	25010	29948	8878.1	13109	11837	16147	26638	40033	41726	41879	2625.7	8150.4	13369	5052
Methanesulfonic acid	302190	361670	294040	315280	273500	213500	323800	283480	43483	37962	32306	69518	1084600	1058900	1115900	919030
Methylparaben	42781	30299	40663	44224	32408	38308	45364	46191	15514	17683	12561	14482	32915	33494	31714	23039
11,12-EET	1849.3	1715.2	2243.4	1174.1	2113	2336.8	3035.8	3351.6	7106.1	5282.6	5936.1	4842	10247	14965	14551	8515.8
11-deoxy PGE1	67885	62046	62693	72268	49039	52681	57593	59003	44390	47815	45303	49767	47371	51276	42830	46386
9,10-EpOME	94637	86767	85398	73797	100330	112890	92963	89246	138550	150790	120670	159010	147990	153590	157320	147440
FFA(9:0)	16086	13473	14955	17872	13785	15536	11975	14048	16251	16632	9997.5	12422	17556	12257	16946	6177
N-acetyl-beta-alanine	589410	583220	624850	560380	647030	533440	596480	725190	67311	81715	56540	62220	657380	919470	520330	530320
3-Hydroxyglutaric acid	28008	30638	39306	45967	20763	24425	26215	22003	32465	11571	20634	23950	112640	237190	114370	161290
Cysteine glutathione disulfide	191220	196560	183710	125290	56070	57402	56890	67420	657200	245070	387820	280110	46023	33995	35338	46741
N-acetylornithine	8631200	8304500	8411600	9311600	8792500	8568600	9432300	9203800	284810	271880	216850	214250	277480	252050	285490	277970
D-Glucosamine 6-Phosphate	10174	11462	7982.8	10816	9	9987.7	11154	10519	84473	81761	79987	107160	478900	348910	405890	466790
3-Dehydroshikimate	203050	178060	174960	223620	197120	171100	256320	208340	53770	44205	52898	65521	108310	147420	101530	93706
Stachyose	9	9	9	9	9	9	9	9	75021	121420	36150	62071	17607	9062	19715	13370
Indole-3-Ethanol	217250	175590	193370	211310	67532	54600	67772	79244	8957.5	6058.5	6932.9	6536.3	3241.4	3757	2836.3	2667.2
2',4'-Dihydroxyacetophenone	42781	30299	40663	44224	32408	38308	45364	46191	15514	17683	12561	14482	32915	33494	31714	23039
Uric acid	243350	208310	174430	251410	123990	129770	141380	135630	44230	28956	65691	42909	210170	217640	144520	266250
3-hydroxyphenylacetic acid	9399.6	12490	10153	12361	7116.4	5157.8	10236	7995.3	513520	549940	497490	530560	294900	403720	281050	283970
7-Methylguanine	9	9	9	4405.9	9	9	9	9	5565.6	7705	6477.7	3669.8	24076	36038	24643	31931
3-(4-Hydroxyphenyl)-Propionic Acid	5888100	5592000	6032700	5865900	5703800	6517100	6311600	6342300	6789800	7227300	6486100	6432100	6360000	6685600	6141400	6122600
5,6-Dimethylbenzimidazole	143390	110510	130070	109670	510590	461870	518040	527520	66539	79099	83517	79988	169850	177710	199350	191800
13(R)-HODE	79600	53702	78670	76419	179570	153540	106810	191490	15078	15402	10536	18330	13123	14753	17208	11916
2-Amino-4,6-pteridinediol	194630	184200	122320	207790	21406	39256	32422	35330	117560	62539	91885	61651	67698	88065	64662	80556
Tetranor-12(R)-HETE	2392300	3644300	3452400	2623900	5923800	4749600	7760700	6388900	2223100	5228900	2806500	2235700	2260000	2859400	2894300	2645500
D-Calcium Pantothenate	10634	14425	8446.3	17153	6648	6059.5	8446.2	11855	70687	77128	73491	81875	1575500	1848900	2567100	1474800
Iminodiacetic acid	4282700	4189800	4824800	4663700	2683200	3605000	2473200	2499900	3394300	3519500	3539700	3267300	62959000	59261000	56434000	65514000
Gly-Val	148030	87967	159140	135150	91778	105110	134620	180550	7331.9	6083.7	8585.8	8915.7	17953	28560	20117	21949
N6-isopentene adenine	41658	38444	35205	42749	84018	72019	80799	84497	11750	12278	9430.4	9199.7	71007	74735	79548	71027
cis-EODA	410080	408930	494540	462840	456240	455980	454230	467350	434700	412410	420430	413900	422180	471470	422530	412380
UDP-D-galactose	447930	541240	389330	660440	561800	709570	634580	688350	31493000	25587000	20980000	18045000	5801400	3677800	4570800	4274300
4-acetoxyphenol	2375800	1200800	1673700	3197800	4113300	4463300	4433500	4389600	5807700	2557700	4658900	3392800	18169000	18092000	13044000	23236000
1,6-anhydro-β-D-glucose	12205	17170	11069	5666.9	4428.8	8841.7	7632.8	7828.1	189870	185490	159070	173760	25254	26821	9409.2	5733.9
16-Hydroxyhexadecanoic acid	258010	197550	213830	244630	493310	408210	633610	607400	150620	166880	175120	97573	385480	453320	439730	334890
Uridine-5'-diphospho-N-acetylgalactosamine disodium salt	55812	66091	40465	59857	48685	46915	49805	48771	586490	355140	348690	345930	91050	81684	59576	51259
Trans dehydrorosinone	9	9	9	9	9	9	3138.3	2351.8	9696.3	9455.7	8614.5	11769	10311	15546	12133	9352.2
N,N′-dicyclohexylcarbodiimide	19801000	17406000	19523000	19812000	46424000	34725000	30409000	46757000	12311000	11506000	11508000	11411000	12157000	12070000	11457000	12267000
DL-2-hydroxystearic acid	28604	32196	34511	21765	29156	29655	49012	60016	17965	23243	30363	6403.8	8536.8	27593	17717	15474
P-chlorophenylalanine	651500	643350	736650	667170	671490	729440	659040	721450	561120	603850	595230	584440	470730	451210	460980	518390
2-hydroxyhexadecanoic acid	258010	197550	213830	244630	493310	408210	633610	607400	150620	166880	175120	97573	385480	453320	439730	334890
N-hexadecyl hydroxyproline	55893	34070	44696	87260	524460	550180	567600	699460	9	9	9	9	1898.9	3947.9	1623.3	1204.7
FFA(15:1)	188500	288150	355730	153250	150860	120190	248130	217310	422220	576080	548870	71482	163070	132380	105730	64976
4-Hydroxybenzoic Acid	494900	490110	453000	437920	368290	454800	442250	494150	976730	1068200	920390	1124900	3151800	4413600	3386200	2710000
Multifidol	15648	10691	10232	9258.4	8166.9	11521	12710	9881.5	19028	21393	19374	18704	9819.7	10712	11993	13212
7alpha,12beta-Dihydroxy-5alpha-cholan-24-oic acid	9	9	9	9	9	9	9	9	12619	3758.8	9251	2857.6	9	9	9	9
2-(4-hydroxyphenyl) propionate	591480	603100	473090	566700	188410	176480	184830	211140	2370500	2630000	2394500	2269600	7080100	9890200	5760000	5689700
Bis(1-inositol) -3,1'-phosphate 1-phosphate	9	9	9	9	9	9	9	9	20223	19256	24449	31029	2461.9	3553.2	2984.4	2812.7
2-amino-4-oxovaleric acid	589410	583220	624850	560380	647030	533440	596480	725190	67311	81715	56540	62220	657380	919470	520330	530320
L-2-amino-6-oximelic acid	309870	313270	287810	335200	354670	289670	337890	325870	1571300	1103800	1215400	1430800	7319000	6430200	5748300	6079800
Cyclic ADP ribose	169290	179770	105190	154950	31509	41199	36471	39598	5479400	4265100	4694700	4558300	2654800	2891900	2707100	2792100
5-O-(1-carboxyvinyl) -3-phosphate	528260	792040	412900	764830	86941	107480	98633	118800	1741900	1076300	1296900	919460	755150	551990	694090	648450
2-(α-D-mannosyl) -3-phosphate glyceride	113120	218210	70378	199160	21034	10653	22146	21496	418580	265970	332950	312910	216450	224830	215480	187830
3-(pyrazol-1-yl) -L-alanine	1866300	1758100	1813200	1974700	1540600	1497100	1506000	1680600	5757600	4026400	4242700	4703100	3714700	4535400	3728400	3356300
1-pyrroline-4-hydroxy-2-carboxylate	629990	619840	687050	679550	751520	650640	729600	735340	21211	31421	30975	27534	270720	298730	288950	281220
LPE(22:6/0:0)	38330	27390	26155	30930	20356	22994	44512	55153	20282	18387	12896	14893	9083	7414.4	9198	6454.7
LPE(0:0/20:2)	23784	17193	13474	27108	104760	91279	101110	152980	9	9	125.52	9	9	9	9	9
LPE(20:2/0:0)	23784	17193	13474	27108	104760	91279	101110	152980	9	9	125.52	9	9	9	9	9
LPE(20:4/0:0)	50991	20020	27902	38017	980840	774150	1061800	1235700	15062	3561.1	6163.5	4786.2	9	9	9	9
LPE(0:0/18:0)	502550	459090	410080	442350	1345800	1382900	1614000	1786100	39698	24558	25678	32507	37164	57891	48030	45319
LPE(0:0/18:2)	731350	718940	614080	916270	7764500	6991000	9010000	11086000	39807	29065	29051	30290	15237	24339	21619	16354
LPE(0:0/16:0)	410340	367820	329740	421980	599060	656120	776790	848440	35320	22809	23643	29999	94973	127410	108660	88722
LPE(0:0/16:1)	84518000	76717000	63160000	91219000	172920000	164230000	173870000	159350000	1013000	315370	331380	410560	63685000	87937000	69271000	64474000
Glycine linoleate	5505.8	7868.9	9947.7	10863	30693	6875.8	10797	13765	1636.1	1982.6	1289.9	1569.6	2742.2	2155.6	3402.9	2278.8
D-Inositol-1,4-diphosphate	9	9	9	9	9	9	9	9	3329800	1436700	972360	4491300	81029	115750	126920	40409
2-hydroxyphenylacetic acid	70887	70069	63081	66555	63825	54265	67874	71728	80019	79361	74248	86934	78017	150650	105930	103640
4-Hydroxy-3-methylbenzoic acid	70887	70069	63081	66555	63825	54265	67874	71728	80019	79361	74248	86934	78017	150650	105930	103640
2-Hydroxy-2-methylbutyric acid	91311	92910	83847	94833	48791	52299	57075	63249	36861	30752	33130	41175	307690	358510	288200	234110
(S)-Leucic acid	488180	496720	402600	497470	254940	230550	264040	279890	1553400	1432600	1251500	1081900	5919600	8842500	5719100	5409100
Adenosine-5'-Diphosphoglucose	24445	34684	18688	22021	4724.1	8910.2	7136.5	11023	41765	27400	29047	21241	9	9	9	9
8-Aminooctanoic Acid	20797	17939	17267	21059	70776	64385	80855	78697	12841	6318.9	11832	13365	32296	32737	35715	29964
Tridecanedioic acid	73893	69441	73045	71030	100950	67680	125240	63148	81929	105470	79710	98554	104590	75070	78112	73999
N-Palmitoylglycine	85683	65069	78178	98316	153650	118000	166340	170740	53048	51295	60908	45574	69764	74964	64184	59240
13(S)-HOTrE(γ)	48765	37875	28959	22829	10266	15576	26976	22987	8580.3	13927	10682	10550	11688	14095	9747.7	13942
9(S),12(S),13(S)-TriHOME	55112	46469	44231	58273	56656	47141	54976	72025	192540	141460	148380	167030	42996	51291	51667	35059
Sorbitol 6-phosphate	9	9	9	9	9	9	9	9	11830000	9228800	11673000	17444000	146730	109500	117940	100180
Allantoic acid	9	9	9	9	9	9	9	9	14019	14804	15537	7354.4	188220	210160	180480	184460
D-Mannitol 1-phosphate	82436	52360	92211	67697	297180	600690	306460	561200	68821000	57117000	60717000	83360000	3266600	1476200	1646400	1107800
Glu-Gln	434930	489160	634460	434040	653660	597370	534970	572500	44568	36100	18189	39750	166660	192420	152750	143220
N-palmitoyl taurine	756220	509980	834170	953760	2596900	1640200	2541000	2543400	15441	9178.3	11835	7903.9	120780	180950	171880	112560
N-Arachidonoyl-L-Alanine	200110	124980	190100	268630	510980	345820	614030	601520	2589.8	2103.8	2372.7	2052.3	42204	60923	56571	38057
Ethionamide	2778100	2514500	2880900	2270600	2204100	2306400	2451700	2391900	2776500	3766000	3443800	3195900	2924400	2867000	2180900	2533600
Glycerophospho-N-Arachidonoyl Ethanolamine	3083000	2911400	3191300	3258600	2433500	2370500	2678700	2973100	2435200	2152000	2458900	2411000	2066400	2210100	1923900	2061900
FFA(16:2)	9141.6	6606.9	7364.5	6999	3976.6	12450	12297	14759	10205	9672	8820.7	9089.3	13815	10872	9789.5	9230.4
(R)-(-)-Mandelic acid	9	9	9	9	9	9	9	9	64789	69740	65515	66358	36631	52203	45834	42113
(R)-3-Hydroxybutanoic acid	11164	9684.9	10077	10535	15786	9571	9658.7	12303	53276	64289	91105	86027	110030	100010	81406	101180
2-Hydroxyhexanoic acid	3384600	3515800	2892800	3481500	1753100	1592600	1783600	1855000	10776000	9582700	8705700	7550300	41250000	60356000	39661000	39609000
2'-O-methyluridine	9	9	9	9	9	9	9	9	70916	73868	61740	61032	16602	20894	19620	19363
3-Hydroxycinnamic acid	55011	49652	49510	49095	49808	54901	52820	51144	58104	55031	60667	53818	53497	53502	56029	50079
5-Hydroxy-2'-deoxyuridine	118200	113050	89582	117790	50989	45947	55566	68169	214170	260600	239110	205310	459490	541160	418000	443820
6-Hydroxyflavone (6-HF)	30008	23445	7038.9	42245	9	9	19022	48108	9	10691	9	9	3698.8	9	9	9
Acetylvaline	24686	29025	28081	29667	18731	17817	21781	25008	83944	84725	82461	69280	344650	469500	328860	355320
Cyclo(his-pro)	445340	369050	360510	538090	367060	365980	400910	437710	9	9	9	9	215250	295360	254070	336110
D-(+)-Cellobiose	117420	117290	125560	139210	137490	115100	143910	132940	589660	949530	1305400	1182700	1839700	1473100	1013600	1317100
D-Galacturonic Acid	9	9	9	9	9	9	9	9	67327	58813	70872	66774	31936	9	27980	28412
Dimethylmalonic acid	9779.3	11594	12963	10777	12000	7951.9	9240.8	16763	384180	415300	404190	435070	5071700	6765600	6624700	6435500
GalactinolHydrate	117420	117290	125560	139210	137490	115100	143910	132940	589660	949530	1305400	1182700	1839700	1473100	1013600	1317100
Genipin	5302.6	4482.3	4432.9	5938.5	2492.4	4570.1	4238.7	9	53600	59346	46908	46202	76755	89214	59305	75613
Glycogen	9	9	9	9	9	9	9	9	75021	121420	36150	62071	17607	9062	19715	13370
Val-Ala	101310	95956	114130	101490	113690	97415	108970	110320	156080	154750	139740	152620	120120	120300	105530	104400
Isethionic acid	7731.9	7305	8079.5	6466	9	9	9	9	24286	13257	18011	26904	49807	64795	52165	57239
Phosphonoacetic acid	39316	53044	43706	43024	9	9	9	9	1820400	1402100	937770	1129700	376560	342560	203280	476760
Sucrose 6′-monophosphate	48020	9	9	9	9	9	9	9	417170	393120	456140	375560	117980	124420	116540	104500
Thymidine-5'-phosphate(dTMP)	246520	345050	190650	276840	30887	40790	31185	49945	402250	307100	356760	342100	102200	88469	127890	94498
Xanthosine-5'-monophosphate	13883	17636	14016	17802	9	9	9	9	66536	49835	85801	56622	245580	194780	341460	192700
3-Deoxyguanosine	39942	44018	30787	24722	4764	19322	10895	24397	61995	38759	36124	49127	43862	69097	85693	47452
3-hydroxy-tetradecanoic acid	68404000	61253000	59266000	74825000	41683000	46236000	48632000	58117000	469590	380880	240840	240750	380040	424710	351600	281380
Acetanilide	69462	82498	66178	73634	30389	31878	31746	33187	471470	444350	446000	362240	1948900	2865100	2027200	2218300
Cytidine 2',3'-cyclic monophosphoric acid	124580	99951	121440	106430	84585	108690	133790	124440	206840	202900	194150	200740	32817	33492	33302	30643
D-Arabinose 5-phosphate	1386400	1542400	1230200	1178800	267720	573320	413060	402540	29050000	16189000	9303400	13796000	1496300	2171200	1350800	1274300
Ile-Pro-Ile	696360	621410	694400	715480	449110	527870	369860	609880	9	9	9	9	9	112830	118540	69897
Isocitric acid	2375200	2487800	2322000	2495400	2409800	2542900	2590600	2701500	87750	78960	55999	65407	70625	122180	66811	83271
UDP-xylose	9	9	9	9	9	9	9	9	103120	97346	83119	76020	2951	3877	9	9
Glu-Thr	1545800	1392400	1647100	1425900	1099500	1197500	1165600	1355200	139100	122520	111820	137300	1092200	1110900	1007500	782520
D-Glucose 1,6-bisphosphate	6512.5	8480.1	8862	14809	9109.4	6012.2	8137.5	10829	375000	239620	207840	537620	21748	18738	23706	17230
Gemfibrozil	62321	49603	96523	78683	13814000	9045900	436380	18449000	69589	52401	37255	39849	51752	45888	38492	36794
N-AcetyTryptophan	5290.3	4375.2	4434.8	5623.2	5871.1	3945.2	4785.5	5391.9	2619.3	9549.2	8124.2	3899.7	6809.5	12179	10584	5751.3
2-Deoxyribose-5'-phosphate	9	9	9	9	16936	25745	48673	9	9	29108	25899	7849	30159	23627	36995	26582
Uridine 5′-diphosphoglucuronic acid	9	9	9	9	9	9	9	9	1052100	588440	564540	770760	208700	301010	252290	192020
L-threo-3-Methylaspartate	6721200	7015400	6972900	7249000	5979400	5976000	5762500	5579900	622410	543210	592870	506020	2205300	3906100	2632800	2985100
3-(2-Hydroxyphenyl)propanoic acid	5888100	5592000	6032700	5865900	5703800	6517100	6311600	6342300	6789800	7227300	6486100	6432100	6360000	6685600	6141400	6122600
Palatinose	9	9	9	9	9	9	9	9	26598	46871	27090	39109	6001.4	9	9	9
Glycine	732000	788970	990180	670710	806120	913330	732530	829380	524980	705250	694930	655800	42828	66208	40273	29611
L-Cystine	32340	37113	55273	19175	80497	50481	46029	61279	599230	744060	493630	624750	36922	15902	17452	18484
L-Tyrosine	394820	366300	500730	413400	394820	357640	426430	287080	173970	134910	167460	162320	558610	631250	558720	504120
L-Arginine	50838000	47895000	50963000	46158000	48733000	55217000	57519000	51991000	794580	853760	381240	682280	276350	351260	759160	556970
L-Lysine	27063000	22742000	29087000	24052000	74167000	67955000	85599000	73049000	13503000	10977000	11194000	9768800	112970000	46640000	59005000	37051000
L-Ornithine	1173700	793910	877120	1138200	942160	1018400	1089100	967250	587940	490370	512730	674570	162090	168670	180210	139960
L-Alanine	33718000	37751000	42999000	33776000	35752000	34891000	30426000	35009000	4624100	5616000	4717900	4712100	2836100	3697800	2704100	1979100
L-Citrulline	1739100	1608900	1997100	1639300	1654800	1627900	1670300	1823700	212160	216830	171860	182900	123050	221790	145800	107250
L-Glutamic Acid	27765000	18786000	23649000	23970000	18027000	27345000	29988000	15403000	4327100	5841300	4966100	5470600	4631200	6627500	4788300	6795100
L-Histidine	9925400	10765000	11869000	9526000	10000000	9039200	8669100	8991300	16986000	12467000	14588000	13989000	9035300	14517000	10815000	10475000
L-Methionine	163110	206310	307960	243190	176730	179450	268510	169180	93946	59031	72049	78535	305930	276600	264830	255160
L-Phenylalanine	97328000	100500000	102400000	94376000	89250000	93875000	95950000	93090000	36641000	47949000	47872000	47309000	96406000	102070000	99073000	102490000
L-Proline	50159000	47169000	55388000	44979000	35646000	41847000	54041000	40311000	5145200	4760100	3383800	4219700	22895000	27211000	24718000	26344000
L-Serine	1857900	1730300	2560300	1473300	1090400	1760600	739880	1254600	236350	267900	311010	282580	69725	106550	114840	66082
L-Tryptophan	6040100	4947300	5754100	5670500	53043000	34512000	56351000	66899000	2763200	3029100	4526700	4582500	23202000	28660000	38068000	22075000
L-Valine	2591900	2567600	2696300	2696000	2051000	2263200	2374000	2381000	406870	265030	452580	407760	3675200	5324800	3761900	3667100
(5-L-Glutamyl)-L-Amino Acid	110550	222050	131520	267160	100960	195610	184990	165070	1710600	2195500	2352700	2886500	86233	151550	74172	88026
5-Hydroxy-L-Tryptophan	75039	76674	83928	76849	114500	84861	102620	101770	9	9	9	9	275830	418400	310510	254480
5-Oxoproline	1563400	1294300	2001700	1363400	2570000	1521900	1791100	1642200	452310	410060	407930	480550	10315000	11490000	10875000	8089200
Asp-phe	9	9	9	9	9	9	9	9	172160	109240	137820	105220	108280	132590	114370	115510
Betaine	1340900	1124800	1361600	1305300	1064300	1212100	1484500	1124100	2545100	2874200	2322100	2438800	12907000	14784000	14447000	15030000
Glutathione Oxidized	1166400	1513700	892470	1329300	140950	187240	198060	170300	1027000	53892	212600	204520	1380300	1691600	1037400	731410
Glutathione Reducedform	250050	209060	269030	202500	156940	63868	132560	117790	29446000	9239100	12694000	16593000	1097000	1189300	1257200	1382900
Glyc-Pro	29316	45123	32555	23095	54668	26784	26283	55179	93665	82068	141950	87248	7250.8	5449.4	11284	9
Histamine	135640	144080	131270	92184	76853	121770	108130	66227	1617000	1805500	2616300	1351200	207720	193530	125840	129380
L-Cystathionine	264640	216190	291190	230450	418300	468280	290460	358780	4991.3	9	9	9	8960.3	11249	9	9
L-Cysteine	13679000	13735000	16314000	14339000	13596000	16959000	11638000	14185000	11928000	15227000	12226000	12035000	1976000	3409000	1775000	1796200
L-Glutamine	24429000	19015000	26848000	21862000	66876000	63469000	80899000	66775000	12413000	10073000	10781000	9421100	109960000	43968000	51222000	34803000
L-Homocitrulline	451770	341870	276210	506170	255820	438200	407280	288220	437540	382370	227420	278740	615890	1126100	892260	942350
L-Homocystine	111510	139340	188680	155440	131950	162470	166200	144850	9	9	9	9	191880	224950	197480	248490
L-Saccharopine	5669000	6314100	6015900	5506600	4773800	6529900	6011200	4542200	2004500	2505900	2296200	3532400	604630	917180	778670	665420
N,N-Dimethylglycine	7603100	6444800	6773500	6786100	6029300	8232900	7468500	6102400	4672500	6383500	4384200	5152100	3273000	3144500	2888600	2949600
N6-Acetyl-L-Lysine	562050	554900	433390	480320	396570	589010	521500	493060	3898500	3233700	2721900	3771400	2644900	2451800	2789300	2308600
N-Acetylcysteine	428670	458280	418730	369190	333500	396830	333150	318950	343900	388490	367390	352450	303460	306730	275220	275060
N-Acetyl-L-Glutamic Acid	405020	356500	483860	317980	490320	446170	458670	464000	2143600	2056400	1712200	2462500	4140300	6054600	5764000	6021900
N-Acetyl-L-Tyrosine	129710	137530	117230	140590	119850	136900	129190	133770	454130	515360	682090	408170	644730	538570	568220	352580
Gly-Leu	14742000	15031000	13394000	14864000	16606000	13198000	17101000	18191000	567420	321960	202830	409700	30429	72401	50849	57912
Nα-Acetyl-L-Arginine	233510	242650	244200	222230	227740	198470	189010	234210	219700	231860	241730	208680	229360	208600	210920	184110
Phe-Phe	80448	74049	76006	77714	70181	41931	85075	85303	10418	5368.1	5623.7	3964.1	59308	124990	55402	64545
S-(5-Adenosy)-L-Homocysteine	255150	238280	199420	320840	264820	217890	265620	278710	18579	15802	10095	19469	18476	21136	39367	22908
Serotonin	282290	253190	197560	287190	183730	174500	224090	403090	9	9	9	9	146890	175850	169760	112370
S-Sulfo-L-Cysteine	1078900	652210	608580	815600	373300	788510	831040	513480	6552.3	24026	61718	49903	106100	40446	60790	49229
Trans-4-Hydroxy-L-Proline	293940	267990	303460	296470	226950	292970	217040	243170	13685000	13698000	11413000	12685000	37086	9	9	9
Trimethylamine N-Oxide	139160	133190	143220	123810	152010	172510	78687	111370	144670	214180	145180	149840	26984	22475	23764	12672
Tyramine	26185000	21962000	28168000	24396000	28153000	19056000	25475000	25329000	9	9	9	9	58136000	67396000	66751000	72501000
Urea	151760	170870	187030	180140	115820	114330	169090	137280	177570	194640	108770	177520	367580	382570	349060	348600
P-Coumaric Acid	3523500	3340500	4384200	3171400	4198000	2470000	2868300	2961500	1710600	1358600	1430000	1701200	3288200	5406600	4184500	5407300
Phthalic Acid	132060	139400	141820	115750	147240	84969	160240	119210	19192	9	13400	11697	116500	128780	134650	106500
1,4-Dihydro-1-Methyl-4-Oxo-3-Pyridinecarboxamide	2941600	887650	4050900	1193700	8255200	3158400	5166400	4448300	5432000	7371900	5324300	9343100	8641400	27633000	10268000	20021000
6-Hydroxynicotinic Acid	40320	41944	14047	27886	35895	21697	24349	36721	9	9233.5	18753	10000	72019	59645	71845	45876
Theobromine	25727	27604	15422	19197	94644	50235	78654	62601	18316	12052	16444	5188.1	39677	45836	41939	31110
Choline	352050	313760	363990	307600	275130	362640	370060	339950	277300	381140	223500	292500	202960	98748	137540	137930
1,5-Diaminopentane	1076400	1374200	1224300	1276100	1165800	1241700	1166500	918300	3277100	4181300	4325500	4837400	1478100	2045900	1727300	1703200
Putrescine	9	9	9	9	9	9	9	9	17994000	20841000	18511000	19640000	2442100	2319800	2257000	2366400
Protocatechuic Acid	44603	34031	43216	55416	31190	32130	48065	41920	9	9	9	9	57256	48131	47234	46267
Biotin	1720400	2061000	1977300	1827700	2201800	1879800	1945900	2082700	101140	100680	85886	80671	1941800	2049900	2352300	1585400
1-Methyladenine	620550	650040	710860	779560	538860	640470	716920	704570	231570	231380	205340	273980	1057700	1331100	1018700	1222800
1-Methylxanthine	27662	16469	8867.6	13208	9	9	9	9	147390	207690	180960	165040	96953	138320	116130	127910
2'-Deoxyadenosine-5'-Monophosphate	148330	269160	56692	174850	19982	83636	31971	60731	6291200	4766300	4558000	6099400	1857100	2369800	3203400	1403600
2'-Deoxyinosine	736010	978570	477290	708120	154860	193170	136860	236200	2418500	1934800	1035800	1253700	707870	1114300	927840	581470
2-Hydroxy-6-Aminopurine	3355900	3108600	2793300	2976100	3001700	2740700	3299600	3469300	1464200	837330	1192800	1198000	4573200	5234200	5054900	4118800
3'-Aenylic Acid	10618000	16444000	6594200	14893000	1753300	1659400	1290900	1616800	25655000	22296000	26615000	28526000	12435000	10120000	13947000	10922000
5-Methylcytosine	32989	42390	30482	22435	13815	22417	11045	17318	9	11577	6412.9	8333	17746	20803	18218	12266
5-Methyluridine	9	9	9	9	9	9	9	9	237200	164640	177530	103330	556890	1192800	364330	401490
8-Hydroxyguanosine	1168200	1304700	774970	1086400	254820	307470	282610	214660	213720	93922	126980	121820	274460	233980	310530	230000
Adenine	1865300	2286600	1838900	1994200	668380	985340	918310	677920	14445000	10427000	10786000	9511100	8052100	9829100	8210700	6386700
Adenosine	91560000	100310000	74994000	86531000	23624000	29364000	28802000	32567000	76117000	49918000	65485000	56317000	109090000	150070000	115810000	90603000
Adenosine 5'-Diphosphate	165710	210720	153240	154830	31228	71958	66689	48365	3813000	3064200	2017700	3400000	1088400	1707200	1802100	1283500
Cytidine	233880	265010	138920	213440	75778	81272	70377	105540	3008300	921280	492520	1292100	1913100	2862100	1430700	1462400
Cytidine-5-Monophosphate	7560200	8574400	4695200	7241600	564710	1014000	736270	653310	4426000	4201100	1794200	3065200	838740	815560	663700	766740
Cytosine	9	9	9	9	9	9	9	9	583420	257890	292410	373920	487000	957150	694320	603050
Guanosine	78712000	82583000	51908000	68331000	16327000	18192000	18184000	22014000	17603000	7190300	15065000	10653000	25696000	45493000	34728000	28927000
Guanosine 3',5'-Cyclic Monophosphate	3986000	2995100	4603300	4501400	16048000	13355000	16344000	18156000	321540	663740	394040	268010	278370	305780	544420	243460
Guanosine-5'-monophosphate	1438900	2163900	1081900	1387300	198800	185260	165760	192580	1153000	809280	809750	867980	75461	77135	72808	58933
Hypoxanthine	9	9	9	9	1416700	1160700	1458600	1189900	2445000	3292800	3079600	3998700	2607900	2420100	2917900	3180400
Inosine	23167000	27714000	17996000	21877000	5554000	6806000	6315700	7751000	16068000	10862000	13565000	15006000	28047000	45413000	32681000	24664000
Nicotinic Acid Adenine Dinucleotide	796280	941670	591140	710530	215120	154430	186650	189060	34382000	22891000	26367000	28277000	13931000	19959000	18123000	13453000
Purine	1630000	1616000	1649600	1772500	1652100	1625000	1644800	1729500	867920	667390	537760	839190	1740400	2107900	1725700	1758400
Thymine	315140	528320	279960	404500	237700	174010	180420	238460	8697200	7864500	11347000	11483000	16903000	17514000	17237000	15551000
Uracil	455550	559980	417340	363940	294550	195450	242950	220960	3075400	2565400	2857800	2888200	2283200	2719300	2412300	2415100
Β-Nicotinamide Mononucleotide	35310	36254	24291	23944	17720	53890	46605	34249	7159000	12522000	4693700	5435600	536480	244110	336690	295150
Cis-Aconitic Acid	63697	73447	58777	77835	57125	74533	55192	85228	51477	62804	63175	41199	50464	54236	61059	59819
N-Acetyl-5-Hydroxytryptamine	9	9	9	9	9	9	9	9	643540	504490	557650	482370	735870	768040	801100	706600
D-Mannitol	14246	11022	16484	11178	7867.3	12548	24193	17099	1587800	1814800	827700	2419200	21647	17720	10235	13696
D-Fructose	781520	848180	982710	612560	590840	562050	550960	324850	3259000	4748600	3875900	2937900	1520500	1718200	2172300	1701100
Lactose	153480	134700	136440	208120	2820900	2089000	3532900	1993400	1490400	655060	1014000	944030	221050	9	286830	171640
D-Glucono-1,5-Lactone	290410	310930	301290	215340	277620	221430	240240	273770	162930	184750	285620	242050	290580	206300	274290	241570
Pyridoxine	499550	424720	447880	405020	705310	373960	575700	553270	2098000	1756400	1597000	1569900	1038900	1292000	612620	1411100
Nicotinamide	40181000	55667000	29084000	41684000	12838000	13659000	12315000	13786000	412720	849230	872440	831930	107110	205990	97976	178070
Nicotinic Acid	3746900	4323400	3855100	4198000	2634500	3333300	3140500	3593100	7168100	6988200	12261000	11472000	27376000	38001000	31078000	18797000
Riboflavin	11642000	11529000	6920800	12478000	5415200	5641500	6468100	5582900	10724000	12952000	10677000	12914000	11523000	14020000	12039000	11532000
Trigonelline	158970	159290	86258	152180	160810	212810	171280	113540	83494	86815	57585	126400	196550	222150	235590	186980
3-Indolebutyric Acid	6337700	6380500	6525400	6586000	6583100	6702000	7523400	7022200	6235000	6243600	7081200	6244300	5821800	6051300	6280900	5496000
Indole-3-Acetic Acid	1135900	1065500	1207300	915690	6150000	4751300	5932800	5067600	464670	462220	678900	377260	2375200	2269700	2756200	1923200
1,3-Diaminopropane	31735	32864	30985	33506	29860	36002	27884	27017	93844	90403	99674	75317	166250	186830	191510	196130
1,3-Dimethyluric Acid	83092	92899	86042	81230	92598	103840	147380	109510	9	9	9	9	119350	123980	115160	92682
4-Acetamidobutyric Acid	176910	212120	210040	249860	185040	201780	173590	167470	245560	851860	840770	510640	2132400	2418800	2102900	1895700
4-Guanidinobutyric Acid	273450	190990	226050	247900	153910	157530	179770	85798	1639200	1718300	1006900	1447600	1288500	2020400	1628200	1477400
5-Aminovaleric Acid	21340	15316	22737	12702	13509	16422	15353	12149	231850	231990	185840	228070	1007600	1619100	2249200	1848900
6-Aminocaproic Acid	2021600	2055200	2461800	2169800	2070100	1965600	2267300	2020900	436850	374000	496770	423280	2447900	3042200	2541400	2248200
Creatinine	72318	154370	111140	77151	95062	84667	68420	128230	87355	81493	121380	75704	89912	122710	82483	59487
Dl-2-Aminooctanoic Acid	9	9	9	9	13389	9	9	9	52081	40595	31932	51227	55642	89891	54853	49678
Dodecanedioic Aicd	10599	12831	14628	6211.1	14671	12418	16717	9256.6	16690	23947	28182	17220	21039	14114	22918	11658
Guanidineacetic Acid	24786	15065	20210	9755.8	17864	20060	19464	13432	253280	265100	219510	152030	913080	1683200	2251800	2120800
Hippuric Acid	110530	133180	115930	138110	142930	103190	125940	132110	14124	16246	15193	15158	82682	100890	72470	74409
Kinurenine	91798	80242	71866	82577	79345	83035	102040	74172	9	9	9	9	373690	343200	399870	321070
L-Dihydroorotic Acid	8876100	11710000	11395000	8860400	11182000	7670100	10060000	12600000	8714900	8751900	7693500	9451700	11795000	12806000	9490400	8167900
L-Homoserine	824100	722770	886090	796420	468160	782890	481570	547800	93580	125290	110670	89044	98978	144770	23325	34615
Maleic Acid	3693000	3128500	2814800	3294900	2467600	3327300	2794700	2517200	314820	212000	239740	271260	1298300	1445400	1318300	1162600
N'-Formylkynurenine	13906	31541	37376	26034	113300	99694	148950	95235	128980	132000	108320	181960	2609700	2712200	2586700	2254400
LPC(0:0/14:0)	447000	344260	405650	587750	1407500	1220100	1349600	1247300	17691	2423.8	7489.5	6582.1	5868.5	7244	2663.1	4635.8
LPC(16:0/0:0)	6917600	6449000	5642700	7864400	16044000	13163000	19090000	15863000	1993500	1220800	1283100	1302900	96960	141940	147480	101650
Neopterin	18901	27402	6509.7	25890	9	9	9	3479.6	824280	774780	813110	762920	9	9	4838	11303
γ-Aminobutyric Acid	335120	317860	332480	338250	158750	190570	192060	126110	29980000	29601000	25079000	23991000	396800	165070	713670	1020300
4-(Aminomethyl)-5-(Hydroxymethyl)-2-Methylpyridin-3-Ol	396280	336970	311160	387670	131830	224520	240280	141440	67537	68677	39341	43976	313870	166390	212380	289580
Acetaminophen Glucuronide	25469	8398.5	22239	4703.1	27753	12014	22153	24146	100370	84761	87708	93006	26788	55671	43324	26596
N-Acetylglycine	10191000	8199900	12113000	9900500	8371800	10758000	12473000	8839800	32396000	37635000	32157000	34183000	150800000	160510000	169080000	173320000
Cyclic Amp	17569000	17658000	21632000	16863000	42157000	32388000	45068000	42892000	249910	798470	259660	218290	371580	563140	442620	311310
N6-Succinyl Adenosine	3029600	2608300	2782000	2598000	3278900	1914400	3078400	3017500	322910	410220	502750	564540	1067400	2134900	981850	915950
2-(Dimethylamino)Guanosine	120960	129280	93329	139090	63232	69917	45443	53187	26778	22253	18028	27620	424290	676360	313360	253180
8-Hydroxy-2-Deoxyguanosine	85480000	127150000	91588000	69686000	30579000	8456300	34533000	19259000	36732000	5926600	20715000	15220000	54576000	54425000	59280000	24062000
Isoxanthopterin	224440	183350	85776	182420	35584	65199	38768	61930	247710	208560	190220	184800	100810	137310	123060	99711
N-Acetylthreonine	32258	48008	38856	25324	40301	40424	41361	54526	61078	52317	48722	55646	202000	228730	171200	133110
L-Homoarginine	49358	23709	25682	47706	14561	24904	50087	38584	3091100	2752900	2424800	3474200	308350	321060	333910	339190
Pantetheine	133240000	134900000	124600000	133850000	140260000	129000000	126780000	119590000	134440000	136540000	136490000	135280000	126310000	131320000	139030000	128020000
Hypoxanthine-9-β-D-Arabinofuranoside	23167000	27714000	17996000	21877000	5554000	6806000	6315700	7751000	16068000	10862000	13565000	15006000	28047000	45413000	32681000	24664000
Pyridoxine 5'-Phosphate	16775	16607	23863	29830	9816.3	6723.2	19902	15851	713100	469230	497440	387750	61430	68058	66445	67818
DL-Pipecolic Acid	1634200	1499400	1832900	1875100	1581400	1495500	1943900	1411900	489820	579740	293050	499020	11882000	11458000	11799000	9737000
2'-Deoxycytidine-5'-Monophosphate	82225	82772	45834	97192	26894	34827	35313	28860	563920	371900	162260	298880	75321	50571	135920	58344
5'-Deoxy-5'-(Methylthio) Adenosine	51654000	57660000	38558000	51370000	13198000	20413000	17335000	20354000	7230000	5480900	8143000	6648300	8660500	9648800	9275800	9611000
Deoxycytidine	42195	22669	8941.2	16115	9	9	9	9	191370	88215	161930	144130	195920	655860	298640	184900
Sarcosine	904910	1086300	1280600	843770	1305900	890900	889550	1436700	1062000	1109000	997920	870100	848800	943760	1131500	925750
Cys-Gly	9	9	9	9	9	9	9	9	1440300	2361500	1630300	996630	9	9	9	9
Imidazoleacetic acid	121390	98834	91319	69340	130240	105970	158990	95724	1695300	1513700	1047800	1479900	1130800	970410	2455100	2142200
2-Aminoadipic Acid	259220	265310	163870	144150	235640	325590	173910	122940	1851800	1714700	1580600	1423500	37935000	29122000	25732000	25106000
LPC(17:0/0:0)	4747000	5273600	5698400	4796200	5502800	5224200	5380600	5944900	5377000	5793300	5710700	5326100	5848000	5743800	5796100	6060200
Sn-Glycero-3-Phosphocholine	2652200	2016800	3244200	1458300	2879500	4056300	2811700	2472300	4315000	4261800	1933900	2462600	429320	199980	453260	655400
P-Aminobenzoate	130540	120640	112960	113870	142950	100610	149270	131330	9	9	9	9	26158	45748	42671	24824
Indole	572190	431970	619730	427320	3603200	2778400	3754900	2604900	196110	273260	489640	176800	1627900	1731300	2056500	1329500
5-Aminolevulinate	293940	267990	303460	296470	226950	292970	217040	243170	13685000	13698000	11413000	12685000	37086	9	9	9
2-Methylguanosine	1668200	1744800	1263400	1229300	466820	432220	497250	562080	1639700	1005600	1266300	1545700	3540400	5358200	3969400	2924400
LPC(15:0/0:0)	675600	560680	561000	784720	1160300	1023100	1267800	1120900	73741	71710	73567	73923	59056	54512	65844	48142
LPC(0:0/18:2)	84236	17697	44322	57580	72293	111860	110250	84623	22811	9263	11712	17745	10553	9266.4	12091	7721.4
Carnitine C2:0	85792	114780	136830	80345	93668	88340	105880	106550	889840	1070700	897850	994390	358270	352380	598180	445170
Thiamine	181420	165730	178700	228250	159880	247180	265030	189450	104130	57670	50577	75255	1251600	453530	761660	577800
DL-Stachydrine	45717	91011	130460	75979	59731	47696	56734	156850	1275800	683350	809300	1260200	263270	96489	419810	298000
L-Norleucine	1166300	1028600	996180	856790	7987800	5511800	7525800	6240100	429630	564850	1024100	562310	2694200	3276100	3849400	2636300
DL-Carnitine	104510	110040	139430	91781	121880	124650	122340	81547	3234800	2642300	1812300	2568700	222180	123430	215970	240400
6-Dimethylaminopurine	776910	951130	682370	952820	700310	576890	663400	705880	929700	960070	669260	1070300	8017700	7814300	6650000	6123900
Indole-3-acetamide	693770	577910	671620	698670	766920	583330	766090	780970	74891	60410	63900	98487	1833700	2719900	2184100	1941500
15-deoxy-δ-12,14-PGJ2	9	9	9	9	9	9	9	9	66406	26895	78979	74842	9	9	9	9
LPC(O-16:0/2:0)	3246200	2819000	2484300	3330700	8725100	7014400	11658000	8961800	1178000	897100	1259500	1213400	972100	989970	1057100	1025000
2-Pyrrolidinone	2230900	2233400	2602300	2704700	3085300	3230100	2910000	2672700	117810	364690	385750	206080	2936300	5223300	3457100	3486800
Oleamide	1215200	642570	664900	311540	404080	533790	1215900	1708800	1804100	1232200	371650	314250	358800	340640	1334000	1180000
N1-Acetylspermine	120190	129940	173910	113730	108790	137950	141570	133350	9	15721	17146	11255	178610	201570	154760	134610
Pterine	59041	43686	54522	60452	47640	50619	27359	55309	327840	346980	347710	308960	100570	113260	74860	96739
3-Dehydrosphinganine	643000	449870	575740	623510	384220	548420	2061800	546720	266780	233540	374460	222850	1416000	1651700	1500900	1314300
2'-Hydroxy-5'-methylacetophenone	848140	985270	769300	1263200	1216500	1387500	676660	1381500	267430	204170	189930	193450	1492000	2545100	1685200	1197300
Spermidine	197410	241800	188800	192000	108440	134590	98793	52898	4661700	5840800	4737800	5613900	3339900	3629200	3896000	4137100
N-Acetyl-L-Histidine	141450	226550	123720	156110	145050	148240	169320	114770	1134800	1658500	1561500	672750	396840	329810	405600	322560
Isonicotinic acid	7708000	5831000	3249200	3590900	2023400	3265000	3481000	1622000	8016200	11860000	15349000	17382000	17687000	14378000	18969000	37634000
Phe-Pro	2511200	3666500	3897600	3868500	3691600	3556000	3387200	3538400	663570	547450	784980	668640	2119800	3510500	2677000	2183000
LPE(16:1/0:0)	1988800	1857200	1495600	2382400	44894000	44292000	48861000	54081000	105730	18503	22228	30608	4223800	6256900	6404700	4314600
2,3-Dihydrobenzofuran	53903	37428	43956	27653	31227	22743	28129	33443	20735	23397	39791	31434	38061	57326	26307	30937
2-Phenylacetamide	384550	350480	406030	296040	315190	319650	404190	358090	67797	61040	59036	49335	655000	1193100	980250	755290
Ethyl dodecanoate	772610	896780	896990	918570	891710	973480	1042200	893580	888000	978700	733320	928980	908370	871770	1024200	910580
L- Tyrosine methyl ester	9	9	9	9	9	9	9	9	624970	462920	677180	662720	1350600	2041100	1794900	1300000
3-Chloroaniline	4009400	4115200	4084900	4246800	4034200	4263000	4215100	4262700	4202600	3846900	4334600	4019800	4307500	4300300	4493600	4308200
Butylamine	250660	195870	218690	223110	134250	201000	150610	129200	33434	60973	32664	35800	39393	61960	27632	24477
Hydroxyacetone	806460	868360	960780	730370	1042300	778100	772970	874430	923210	1244800	1088800	987910	631850	898580	889750	935510
Methylcysteine	9762500	12020000	11071000	9703000	8069600	7315300	8985500	6972000	25868000	20042000	16124000	19224000	17333000	30396000	20881000	21454000
Ethylparaben	61600	59607	51011	45452	47534	45697	51037	50336	44025	57996	61997	58947	52391	59250	53076	54634
Triethylamine	587800	433970	636880	669110	361660	517190	565410	631860	192400	9	9	9	670070	1069500	980530	811630
Barbituric acid	404260	386220	541940	297400	544510	473340	395340	480630	438140	316740	283940	297250	1769100	1855600	3243500	2878800
Creosol	2403300	2939200	1799900	2614500	757100	976460	1323800	1280600	294400	254970	353430	339560	290160	322530	357750	305950
3-(Methylthio)-1-propanol	9	9	9	9	9	9	9	9	677070	606640	815280	797680	660970	905190	861690	568650
2-Pentyl-3-phenyl-2-propenal	40422	35106	60805	23401	39141	46853	68037	39766	27233	46499	34957	38113	31225	36274	27016	34022
PYRROLIDINE	1560900	1516000	1520600	1526900	1117800	1291400	1342300	1321300	278950	189850	288290	260760	2252900	2837400	2205100	2214800
1-Naphthylamine	388340	367300	496990	380070	491610	392540	404000	502220	289820	345590	376990	354590	392280	314340	405700	326830
6-Methylnicotinamide	348560	212140	268580	325270	334670	445040	389730	399960	1150500	1044800	1398500	1430500	4199400	9077000	6621700	4774400
(R)-2-Hydroxy-3-phenylpropionic acid	2013000	2104900	2542000	1840800	2019500	2392100	1961100	2021200	2969100	3120600	3038000	3186600	2190900	2502100	2361800	2513100
Nα-Acetyl-L-glutamine	2020900	1582300	1625300	1917800	1621800	1782100	1985900	1423700	4957100	4246200	3317200	4034900	3174400	4288200	4515100	3918800
Gly-Phe	10753000	13897000	14958000	19078000	10724000	13550000	14895000	20522000	86292	14407	44193	39211	27252	23491	50403	20472
N-Methylalanine	7603100	6444800	6773500	6786100	6029300	8232900	7468500	6102400	4672500	6383500	4384200	5152100	3273000	3144500	2888600	2949600
3'-UMP	54385	33540	18820	15252	29145	19687	46041	47832	189300	203170	185190	138910	62513	74037	130190	55984
N-Methyl-L-Glutamate	259220	265310	163870	144150	235640	325590	173910	122940	1851800	1714700	1580600	1423500	37935000	29122000	25732000	25106000
N-Methyl-D-Aspartic Acid	55877	43541	77048	39061	102910	136560	82591	61252	383860	342550	390160	445500	2497400	3386600	2750500	2508900
N-Alpha-Acetyl-L-Asparagine	13143000	15053000	16367000	13801000	17773000	15605000	14864000	17216000	280950	369570	284220	422330	249630	392980	373520	355300
Phosphocholine	239370	341890	252280	181260	192930	206120	108890	275670	2573300	3690600	3665300	3417900	1666000	1289600	1237700	1405800
Thiamine Monophosphate	70765	83141	60188	86405	15976	5607.7	18956	13851	107280	102190	116920	107590	506400	401280	802320	801300
2,4-Dihydroxypteridine	154200	131260	90317	160750	70695	72480	84702	91540	223500	165970	165380	240770	166790	199900	192690	162660
N-Amidino-L-Aspartate	9	9	9	9	9	9	9	9	9	35997	9	9	346160	382570	199970	292320
L-Tryptophanamide	45387	50440	51033	32593	262550	202070	279890	229650	11439	24432	37226	19426	115100	110530	131090	92408
Catechol	2720300	2883900	3282200	3005900	3049700	3325100	3099100	2965600	2827800	3304000	3398200	3576400	3087100	2559600	3324700	3430500
3-Methoxytyramine	199320	193110	208240	226500	201030	220600	207720	195560	100880	80435	76112	103580	201120	250960	233260	229970
Pyridoxal	132350	101840	67591	108850	92063	60001	64044	83289	2002900	1762700	2114600	1749600	654970	1075700	763280	838800
3-Methyladenine	620550	650040	710860	779560	538860	640470	716920	704570	231570	231380	205340	273980	1057700	1331100	1018700	1222800
Delta-Hexalactone	60706	77711	87520	119240	55496	62128	55574	81072	54333	141750	196570	113640	130970	153150	94129	69867
1-Hydroxylamino-2-phenylethane	7225900	7531500	6720600	7580200	6956400	7080200	6866000	7345000	2937100	2906600	2994400	3420500	7530900	8314100	6995500	6929800
Coenzyme II (β-NADP)	9	9	9	9	9	9	9	9	377050	310370	368040	449160	233680	324320	285550	501840
D-(+)-sucrose	153480	134700	136440	208120	2820900	2089000	3532900	1993400	1490400	655060	1014000	944030	221050	9	286830	171640
γ-L-Glutamate-Cysteine	9	9	9	9	9	9	9	9	703290	586300	604440	585480	367390	356110	351460	417230
5'-Deoxyadenosine	5505000	6622600	4061500	4810200	907800	1292600	1125600	1456100	20946000	11702000	9834600	9856500	5340400	7403200	7279000	4451300
Threoninyl-Phenylalanine	43808	77166	65282	90009	68776	88877	102050	138550	60742	66271	97055	86665	73635	81651	73573	52319
Benzaldehyde	6302700	6350300	5821300	7101500	6804200	6456700	6207700	6653500	3154000	2829100	2513400	3081600	7193300	8970200	6883600	7156100
alpha-hexylcinnamaldehyde	110530	83760	105660	99381	85640	79297	56660	140840	50589	53692	57164	59939	39841	57439	39080	40492
N-(2-hydroxyethyl)stearamide	56959	35793	43625	59616	83642	109400	120420	112770	18543	11433	34217	24003	32091	63547	48462	87706
Triphenyl phosphate	78895	84352	40849	68208	50247	38789	72309	56277	50774	73617	71821	56567	70170	54958	62762	70376
Sphingosine	643000	449870	575740	623510	384220	548420	2061800	546720	266780	233540	374460	222850	1416000	1651700	1500900	1314300
Hydroxyquinoline	120210	127180	125900	87685	793120	551730	712710	615680	67675	72784	119340	79232	280980	318560	338590	272760
DL-O-tyrosine	97328000	100500000	102400000	94376000	89250000	93875000	95950000	93090000	36641000	47949000	47872000	47309000	96406000	102070000	99073000	102490000
Indole-5-carboxylic acid	51412	51697	52830	44209	43725	55744	70036	65816	96006	111860	103630	119390	1026600	1445700	1002400	923210
9-Fluorenol	242200	274040	293990	292430	248310	260030	311700	313630	268980	277400	239380	289220	241000	282530	271720	213370
Palmitoyl N-isopropylamide	2803400	1811700	2703800	3343600	197610	231180	5786400	315680	152370	164310	224170	148820	171660	152870	174290	155550
6-O-methylguanine	1698300	1832700	1457100	1703200	1000900	811390	1055900	1086700	546040	434220	431180	438900	1314200	1253800	1383400	1172900
Kojibiose	15732	13666	11484	14194	195290	89221	124710	177920	953450	707840	1221600	1003000	71823	32385	58305	58910
2'-O-methyladenosine	11463000	17870000	7235400	13579000	1581600	2021200	1396300	2041700	24698000	19823000	30469000	20485000	9992200	10746000	14419000	11930000
Oxypurinol	2286800	2541000	1274100	1676700	572240	485700	517010	684690	495520	242120	404690	334720	1391200	2706400	1290000	1275700
Allopurinol	429220	287590	229830	378470	369190	639060	564190	584410	2039800	1913600	1970300	2149200	5044700	10318000	7975700	5982200
MG(18:2/0:0/0:0)	93648	98548	86647	95854	99922	79296	69343	63844	84975	134850	108450	66664	86788	104910	79236	89489
2-Aminomethylpyrimidine	3489600	3473700	3653700	3388800	3165800	3093900	3242300	3454700	5086500	3835900	3572800	3883500	2622300	3861100	3321400	2930400
D-Turanose	15732	13666	11484	14194	195290	89221	124710	177920	953450	707840	1221600	1003000	71823	32385	58305	58910
(R)-(-)-2-phenylglycine	7225900	7531500	6720600	7580200	6956400	7080200	6866000	7345000	2937100	2906600	2994400	3420500	7530900	8314100	6995500	6929800
1-acetylindole	167010	152430	172890	164640	639590	560350	688530	620290	98399	111020	118950	86764	289670	304160	268180	266710
1-methylhistamine	90617	60575	73149	56103	57267	49920	83030	54935	87888	78183	41694	50103	37650	41267	60293	75186
Linoleylethanolamide	37148	22580	38942	45012	104330	65542	102140	111560	3685.8	3422.4	4757.5	4188.8	11816	18266	18155	19098
L-Isoleucine	120400000	124020000	109920000	124630000	58100000	100660000	87127000	126450000	14933000	12057000	13737000	22426000	153380000	191250000	176690000	152780000
LTE4	2003.3	3416.9	1837.4	2666.1	6488.7	3959	14296	15324	12237	8257	10150	9010	1334.1	3311.2	3551.3	2784.7
Creatine phosphate	5120.5	16033	28629	16654	17297	8394.1	12122	9660	110730	131690	137550	135150	57782	37972	61927	55173
1-Methylguanine	1698300	1832700	1457100	1703200	1000900	811390	1055900	1086700	546040	434220	431180	438900	1314200	1253800	1383400	1172900
Palmitoyl-EA	9	9	9	9	38096	27915	28408	44849	9	9	9	9	1508600	2258100	2125600	1687800
9-octadecenal	456660	441580	474220	414420	457220	551390	664990	564420	218720	186790	147610	151460	472280	358090	349690	412480
N-Methyl-α-aminoisobutyric acid	11508000	12280000	12957000	10429000	12055000	12465000	13541000	12966000	26372000	32499000	15781000	25456000	169860000	149940000	159620000	179930000
N-Acetylcadaverine	1611100	1614500	1177100	1563600	510480	887090	511180	964690	1821600	2602000	2431400	2488500	12942000	25434000	12034000	19094000
Flavin Single Nucleotide(FMN)	1427300	1181500	1012900	1717400	170140	89175	157350	117360	1782300	1602800	1788900	2117300	2291300	3364800	3358900	2679800
Biotinamide	9	9	9	9	9	9	9	9	173550	106360	115100	93382	66981	61783	61268	44859
Hypotaurocyamine	5191000	5023600	3419600	4196200	1091100	1190300	1190900	1721500	1161900	678810	706400	784980	1699100	2833700	2314500	1699100
5'-deoxy-5'-fluoroadenosine	2954800	3444200	2355000	3263600	818240	1058700	956830	840780	2988300	1756300	2312400	2022800	4233900	6496900	4676700	3314100
(1R, 6S) -6-amino-5-oxocyclohexyl-2-ene-1-carboxylic acid ester	51624000	57671000	62693000	51533000	52061000	47080000	48090000	44834000	93507000	68473000	75073000	77410000	45675000	68031000	57060000	51757000
1,3-Dicyclohexylurea	227610	251900	253250	220840	283830	242270	228110	239130	225630	270380	261270	253290	237770	253690	247360	271240
PC(O-16:0/O-1:0)	18333000	16032000	14236000	19681000	37182000	31433000	43213000	37077000	5202500	3387400	3760900	3798600	271840	361880	369490	324430
4-tert-butylbenzoic acid	688600	556110	566600	527590	371650	413160	396320	319180	511340	654250	487650	503600	424720	302520	370290	338360
2,4-diacetamino-2,4,6-triphenoxy-D-mannopyranose	9	9	9	9	9	9	9	9	544820	305360	344090	510860	497570	731160	639660	375100
1-deoxyvaleric acid	1229700	1120600	1179800	1158200	1002900	1216600	1188100	1078000	1046200	1088800	1149500	1098000	911560	1035800	1058600	1150000
2-Mercaptobenzothiazole	74681	71208	77078	64335	67357	65718	66877	64318	33289	38014	27635	35043	47966	70259	70066	49926
Menadione-9	9	9	9	9	9	9	9	9	102190	52466	69257	61808	9	9	9	9
10-deoxyformamycin	1728800	1783200	1423300	1826600	2516900	2700800	2992500	3103000	192740	102800	143770	181270	443900	660370	589680	493190
(4Z, 7Z, 10Z, 13Z, 16Z, 19Z) -Eicosahexaenoate	16422	11469	9485.7	15201	26449	18232	26421	23267	666920	389860	526810	435960	5824.3	9	9	9
Guanine	3355900	3108600	2793300	2976100	3001700	2740700	3299600	3469300	1464200	837330	1192800	1198000	4573200	5234200	5054900	4118800
Chrysophanol	188480	167410	174870	173360	169240	177000	169450	181370	9	9	9	9	80230	113640	97472	71895
3'-Dephosphocoenzyme A	9	9	9	9	9	9	9	9	8395100	2625800	4014600	5648400	14389000	14899000	20852000	13738000
Leu-Gly	578220	1513600	1527300	4713900	23078000	6797500	24720000	13273000	377640	143380	211640	291950	144080	235780	204990	171960
Cytarabine	216180	200420	152930	203550	112580	58063	77680	97687	2111000	749380	998350	676750	1794500	4036300	3116500	1713700
Piperidone	82593	107310	162000	100160	83312	52334	100690	119170	406300	258800	173000	66344	92190	145670	212680	155730
(2S, 3S) -3-methylphenylalanine	29916	47394	42515	55708	50153	33813	58133	29716	175970	165390	198010	154960	504490	559720	559550	385760
MG(0:0/16:0/0:0)	1172600	1170500	1246800	1079700	1240100	1698200	1714900	2003900	1764300	1178700	1258500	1771900	1935000	1005500	1406200	2087800
LPC(0:0/20:4)	295100	124470	170910	264490	372150	274280	552570	718580	43174	8189.9	16446	25289	10123	7090.6	8639.2	24273
LPC(20:4/0:0)	295100	124470	170910	264490	372150	274280	552570	718580	43174	8189.9	16446	25289	10123	7090.6	8639.2	24273
LPC(18:0/0:0)	1257700	1143500	986450	1399900	3645500	1961700	4103000	3669900	224430	173610	149950	203510	332330	451240	412790	344220
LPC(18:1/0:0)	10158000	6137200	6834500	11699000	23842000	18886000	27770000	26623000	407160	276380	383150	327080	122080	179520	185700	91443
LPC(18:2/0:0)	588980	196670	270500	558710	622640	852010	944180	987420	813750	470360	566570	439350	29752	25569	47743	15654
LPC(0:0/16:0)	18176000	15845000	14118000	18789000	37588000	31511000	45939000	37136000	5471600	3318300	3847500	3664400	274060	355080	383980	303310
Shinorine	1577800	1696200	1412100	1744000	9	1651200	1226300	924160	707050	1019700	1179800	658380	1629800	1533200	1335100	1213600
mycosporine-glutaminol	9	9	9	9	9	9	9	9	1380900	1200700	1898000	1257700	9	9	9	9
Mycosporine glycine	139640	42142	70339	101230	38409	169230	117070	33427	930750	1250400	777080	1151700	46129	16257	88576	119300
Ala-Tyr	308770	324920	199550	262540	57619	89334	70382	81303	1011300	508710	479360	514150	261260	353790	358380	270730
Carnitine C23:5	348400	294690	278030	310370	115170	120280	147310	157610	118340	82538	76306	125650	29977	43284	26943	35111
Carnitine C22:2	1701600	1164900	1157000	1244300	5145100	5273200	5853800	6210400	93659	64959	57395	67973	1012700	1346200	1161300	972500
Carnitine C19:2	782340	899480	901170	798250	1194300	1105300	1007200	984620	1175800	1366000	1278500	1177300	1640600	1600200	1581800	1603700
Carnitine C18:3-OH	171980	159150	139320	226290	180630	169660	209250	251450	28177	15421	19215	22308	6601.1	7945.8	7375.8	2716.8
Carnitine C15:DC	31242	27104	33893	44956	11467	13279	27886	14328	14602	11387	9090.8	18023	14237	16479	7972.7	13444
Carnitine C9:0	139330	122330	133790	169260	144360	110980	155920	177040	9	9	9	9	117050	174460	170730	96471
Octadecadienamide	382330	219020	188970	61785	97738	126590	350690	397010	377600	269680	143530	79932	42271	94274	349080	284410
FFA(22:7)	27415	31026	33907	29579	32551	15855	26784	30449	24721	40643	30169	21570	24787	24278	28506	25508
(2S,3S)-butane-2,3-diol	665140	701760	757890	709310	501220	516050	618780	592110	120340	135840	167370	165810	1185000	1395300	1078100	1035800
Ureidosuccinic acid	125940	53258	90774	130650	432300	455170	439840	248010	244870	255550	176120	219500	9	9	7490.7	13136
5-Methyl-2'-deoxycytidine	9	9	9	9	9	9	9	9	18360	21391	20922	15565	11820	9	9	9
Pantothenol	9	9	9	9	9	9	9	9	53605	231640	53294	66430	9	9	9	9
Diethyl 2-methyl-3-oxosuccinate	44770	42497	39813	33762	52205	45855	46114	45164	38912	42684	33691	42213	32697	37379	34882	39332
N'-Methyl-2-pyridone-5-carboxamide	9	9	9	9	9	9	18857	6799.2	40992	27947	56850	46087	216070	416050	398730	214780
Quinoline-4-carboxylic acid	38149	52933	62775	64580	41843	35396	46308	56256	29401	41416	18368	16251	1037200	1582700	1210800	1047100
2-(2-Benzothiazolylthio)ethanol	142080	109720	138070	149340	334080	255740	413520	392850	29697	24583	23572	23726	802920	1194300	1171200	707970
SDMA	891430	864170	1086800	897600	1269400	1231400	1051100	1245700	3119300	2694800	2211800	2260500	377550	667580	600260	517570
Cis-4-Hydroxy-D-Proline	9	9	9	9	9	9	9	9	4515000	4671700	4252700	4765400	9	9	9	9
N6-methyladenosine	921460	910720	859030	905040	464990	409480	532320	435990	455020	360290	371110	235480	354560	730110	522980	311010
N-Acetyl-D-Galactosamine	14178	30143	9660	16820	9	9	9	9	169910	213550	143430	178840	33053	81405	67671	60512
Leu-Val	52029000	58760000	50502000	69053000	98886000	92037000	139070000	116850000	172900	72252	94663	156990	530800	678620	689170	370060
Phe-Asn	35808	19665	20009	39346	106430	59817	130560	62402	12613	4468.5	9940.8	15738	111940	561990	263370	217560
Phe-Met	9	9	9	9	9	9	9	9	3355600	1084400	2077300	1607400	312620	879870	301720	393400
Glu-Met	408710	553110	479520	492260	447530	281630	456130	512220	13707000	4282800	7429800	5369100	3450400	8756100	4268600	3324000
Met-Glu	408710	553110	479520	492260	447530	281630	456130	512220	13707000	4282800	7429800	5369100	3450400	8756100	4268600	3324000
Phe-Val	709690	834060	912160	921750	1628300	1528900	2741100	2626200	314570	322280	218500	218120	713640	846100	414520	464480
Carnitine C16:2-OH Isomer 1	68743	58254	52239	69118	148830	126580	175720	189100	15373	5891.8	9464	13593	9	9	9	9
Carnitine C18:1-OH	13113	10872	10618	11514	15796	14260	12793	18082	9	9	9	9	9	9	9	9
Ala-Glu	186940	155880	173820	220920	213350	167140	215580	269430	10491	14163	9457.2	13873	46340	53156	49492	45582
Indole-3-acetonitrile	868200	850300	875210	952560	2985900	2016600	3631200	3532500	248850	274270	354820	380650	1021600	1066300	1075400	803530
Isopentenyl pyrophosphate	135240000	120460000	136350000	138860000	155780000	148730000	147800000	147100000	338350	286970	390410	393970	34818000	53554000	62913000	67438000
Pro-Ala	9	9	9	9	9	9	9	9	2785100	2768400	3461100	2939800	9	9	9	9
L-(+)-Gulose	204660	254360	225180	136470	273430	99493	177310	135430	2555700	3051400	3043800	4895100	1007900	506230	972060	1381100
Aniline	116580	103990	108140	134130	126320	106730	109080	123910	96906	75626	44961	104140	204490	230780	137480	136710
2-Amino-1-phenylethanol	21171000	15863000	22511000	18416000	23706000	15983000	22109000	20125000	64052	28888	15541	15058	41229000	69586000	62218000	54555000
1-Methyladenosine	921460	910720	859030	905040	464990	409480	532320	435990	455020	360290	371110	235480	354560	730110	522980	311010
Carnitine C16-OH	45880	34781	41484	41422	19818	24014	37294	16793	16813	16222	17581	15624	15150	17763	13679	12494
PC(O-16:0/0:0)	1154100	1660500	917860	1471700	8773700	4377700	1946100	2118100	28559	20988	33494	35644	43495	57020	65224	40478
LPC(O-18:1/0:0)	663880	346370	562650	783710	1356700	902260	1325500	1617200	9	9	9	9	27302	33166	38916	20281
NE,NE,NE-TRIMETHYLLYSINE	712040	695280	711530	726830	750600	685980	816880	692920	6135500	5180100	5423500	4854000	3613700	4551200	4463200	4318300
N,N-Dimethylarginine	954190	629710	933430	834570	1200300	1492000	1291800	933690	3136300	3222400	4381000	3352200	748480	954340	671000	731600
Glu-Leu-Arg	9	9	9	9	9	9	9	9	877640	971930	911130	946200	35779	57911	45439	37374
Leu-Val-Ser	1608600	1829200	1631900	1483400	1878600	1353100	2091800	2177800	1279000	980940	1343700	1369300	264320	439000	324770	221080
Phe -Glu	2012500	2266300	1878300	1866900	2404000	1516900	2218000	2618300	81263	78959	91196	122110	152560	461330	253330	244530
Leu-Ala-Val	223390	246340	187120	292540	418100	227510	557220	402140	9	9	9	9	9	9	9	9
Gly-Gly-Phe	426030	346240	377620	218230	203230	247050	222440	304710	104800	110170	74967	159280	50246	80770	43419	52518
Glu Glu Ile	1438900	1476600	1654000	1751700	1344900	1305600	1358300	1430100	182750	159380	185780	205050	94519	188790	306680	146230
Leu-Leu-Glu	56207	74259	47543	82508	147790	47902	223590	125680	36612	45994	30159	29262	95514	93561	55605	51999
Ile-Ile-Thr	9	9	9	9	9	9	9	783180	707350	377780	586540	515910	64494	87359	38486	23350
Val-Val-Val	9	9	9	9	9	9	9	9	310750	239930	268270	180830	415760	510480	414200	360070
Thr-Leu-Ile	41500	55407	39701	45669	65605	41577	73207	31079	111530	133210	134020	104400	110890	74187	57327	67400
Phytosphingosine	9	9	9	9	9	9	9	9	137170	143170	178080	174930	22122	40409	38172	37850
LPE(15:0/0:0)	9812300	9556100	8412700	11249000	7180100	7292500	9586800	10335000	656940	426460	585560	658180	178760	351270	252450	280920
LPC(0:0/17:0)	7690400	8194400	7554800	7769300	8327300	8347200	7793900	8778700	8278100	7497100	8032400	8010200	8540700	8384100	8726100	8892700
LPC(0:0/15:0)	348170	263590	260870	345280	804680	767180	628030	592390	4287.1	11636	15655	10195	21159	17515	21000	15506
LPC(0:0/16:1)	248980	223690	203470	326710	1082200	710590	990340	1124700	7972.9	6071.4	5724.9	4010.1	3765.3	4995.2	4740.2	2569.2
LPC(0:0/18:0)	2669500	2380300	2059000	2359700	7237700	5262200	8721700	8193700	845180	752470	960740	903570	826190	849610	847250	971550
LPC(0:0/18:1)	3118700	2080300	2613100	3561300	8718100	7037700	9334500	9168700	92442	44385	59064	32404	49795	106570	103890	42465
Methyldopa	41564	35745	50267	65352	22536	44234	37768	14794	100270	84100	53817	146100	29291	21078	28618	30659
(E)-Guggulsterone	625270	535440	466060	682180	724690	776790	955110	916910	34372	38776	20770	43971	137750	175470	160340	143210
(Z)-Guggulsterone	379000	320420	287510	323300	473830	495120	626080	683970	48932	42292	30388	72396	73031	149960	89347	75188
1-Methylguanosine	1219100	1391200	965800	1130700	397310	301610	378500	458560	1279200	806860	1011900	1263000	2528800	3628100	2679700	1959500
1-Methylinosine	78136	79677	78480	86112	36684	26897	42919	40951	59594	41787	34010	47702	103500	290690	133130	137220
2'-Deoxyadenosine	2014400	1677000	1696100	1576600	1438500	1686800	1471500	1716500	1211900	1500200	1244200	1173200	1214800	1409900	1522300	1813800
2'-O-methylguanosine	1219100	1391200	965800	1130700	397310	301610	378500	458560	1279200	806860	1011900	1263000	2528800	3628100	2679700	1959500
2-Phenylglycine	67008	41461	82755	59967	57642	31414	38592	37751	108940	67539	115710	132160	556830	1058100	738020	964650
3-Amino-2-piperidinone	1589100	1569800	1843200	1841600	1979600	1790700	1865500	1530700	195940	192730	285590	236370	2134200	2018100	1760500	2038000
3-Amino-4-methylpentanoic acid	261440	230580	307960	230160	254270	181030	354210	289170	125280	99240	102890	111490	327680	302160	242890	262400
2,6-Diamino-5-hydroxyhexanoic acid	9	10649	9	9	12211	6439.2	7373.2	15784	1908900	1890000	2265800	2829400	16063	27655	15442	20843
Acrylamide	945000	976260	1335200	805050	941890	756200	712740	1169000	146580	155440	155380	137390	1513400	2669700	1277300	1565700
Agmatine	574700	500990	551180	610170	431280	637340	501980	332810	1187100	1509400	1779300	1428500	8040500	4333100	6308400	8790400
Ala-Phe	751800	1154000	1060900	1373500	3363900	2310900	3414300	2756400	73337	21556	38660	35740	193420	51849	61532	43106
Astaxanthin	152820	169160	168630	146270	176880	164610	184430	155590	214600	214940	223040	204180	237240	233690	229910	209570
Cyromazine	170490	121180	110470	117310	54774	53595	80986	85876	15233	17450	15508	13335	91261	101130	86207	79070
Cytidine-5'-diphosphate	3668200	4545300	4740300	3573600	3194000	4461100	4534800	3027100	1409500	1487900	1817400	1494200	6767300	6743500	6994500	6955800
L-Allothreonine	824100	722770	886090	796420	468160	782890	481570	547800	93580	125290	110670	89044	98978	144770	23325	34615
D-Glucosaminic acid	124040	58467	100190	42988	26608	67246	94607	102260	36222	20526	25479	26887	84876	143680	57581	107150
Harmaline	19031	23508	16869	21489	8257.4	9665	6644.3	9116.1	208450	204520	206510	169020	539280	655500	500310	673340
Val-Tyr	207920	310160	118740	367550	1539100	771860	2188300	1449800	28602	19543	21767	11487	9	76286	25048	51112
Jasmone	69670	37527	70876	38224	42726	24955	30444	36348	35933	23669	32198	41624	14626	35698	40730	25960
Ala-gln	40129	56154	108570	45237	107820	115730	100180	123910	21571	17253	23852	27684	9	9	9	9
L-Methionine sulfoxide	1219700	1009800	896050	967890	446070	979020	1173600	514450	59332	131050	53383	106120	37970	77786	17479	48913
L-Norvaline	54210000	55213000	57986000	47669000	46699000	46279000	48231000	52430000	7523900	8349000	9679200	8547100	70999000	103400000	76871000	79395000
N1,N8-diacetylspermidine	167180	220460	170600	254180	62182	114370	98006	107970	298600	352740	333910	235730	5934700	6885400	6054600	6567900
N4-Acetylcytidine triphosphate	3400800	3468300	2900200	3407500	3556000	3540700	3167100	3039000	3209500	4057500	2954800	3399000	3291500	2836000	2959600	3365800
N6-methyl-2'-deoxyadenosine	21197	15065	7848.5	14225	14737	8947.8	9	9	86841	71870	33583	28466	9	9	9	50116
Nicotinamide riboside (chloride)	36422	47714	51935	27163	7639.5	17730	6397.4	21674	3868500	3193500	1458900	3014300	1409100	1183400	2255200	1618400
Palmitoylethanolamide（(PEA）	134210	139480	156410	207680	312470	216300	370460	317040	121300	94410	138090	143000	1674400	2776600	2272100	1743900
Stachydrine	73095	48398	143380	54614	22321	43732	37051	27008	169290	208360	211080	127220	117400	140490	97704	125210
Cyperotundone	65194	87320	80474	90917	93979	111710	69574	81868	100600	94320	135270	103020	88681	103330	104610	87249
Nootkatone	19391	24725	31176	24756	18838	40998	22951	31111	22448	30720	41469	36368	25580	19538	34460	26536
Zerumbone	99388	75473	73758	79591	103520	112260	81825	95411	128440	140640	135170	113940	122540	112270	129540	140430
alpha-D-Glucopyranoside, beta-D-fructofuranosyl	2569.4	2252.5	5898.5	9	20475	16065	14971	17784	247960	180640	57042	160520	2252.5	8979.3	4083.5	1671.3
Arg-Leu	230050	216820	162080	257970	410460	264750	342800	227560	1222500	921770	919750	1266400	260760	362590	378030	378320
Asp-Tyr	9	9360	6293.9	9	27742	37925	9	9	123680	83491	95258	179610	198250	325880	231470	136120
DL-Aminopimelic acid	228720	189470	225190	217540	165830	80080	209240	178060	190400	230180	280370	379110	11383000	18732000	11043000	11398000
Eicosanoyl-EA	19032000	27048000	22893000	30066000	9212000	11258000	36328000	10212000	9436200	10482000	13356000	9581200	8692400	5931200	7967000	9908900
Gln-Phe	28649000	28702000	26979000	30465000	27049000	22852000	30252000	28215000	465650	558620	732520	665320	26567000	31502000	30783000	24282000
Glu-Leu	691850	782330	819240	846620	635470	524640	796650	787360	49105000	22408000	28877000	25181000	6191000	12523000	8574600	7933700
Glu-Tyr	156340	174020	140890	87411	151630	106260	131370	104160	9772500	5111600	8380800	8356100	1828500	4605800	1858900	1834700
Gly-His	155030	97757	113120	135130	103290	138180	80389	107540	468990	478230	610560	513770	25203	86152	32710	23358
Gly-Tyr	8597000	9045000	8930700	8774300	9782200	7956100	11581000	10604000	37309	52586	30115	37517	44830	43280	32856	43771
His-Leu	3974400	6158700	3958300	6164000	4834700	5060500	7253800	5465000	111190	200980	186420	131120	5351500	6618900	7685400	4382200
Ile-Lys	8942400	9200700	6681400	9134300	14586000	13215000	23770000	20384000	2260700	1994000	2189000	2686100	5513500	8307100	6447600	6954000
Ile-Met	9	9	9	9	9	9	9	9	671710	327280	418650	356860	104260	240680	226370	158720
Leu-Pro-Tyr	18620000	17254000	16298000	20376000	15096000	14459000	14726000	17201000	69396	54946	54605	58175	431800	928360	1521900	736860
LPE(17:1/0:0)	13379000	13546000	12331000	15085000	9197600	8488800	10195000	9596700	466900	221810	228650	306010	3613700	4494900	3715200	3730200
Methyl nicotinic acid	9	9	9	9	9	9	9	9	539050	400300	821820	512170	1466600	2728000	1201800	1120900
Phe-Leu	1151700	1221000	1145200	1253900	1324000	898090	1239100	1355300	18558	14904	20527	19939	504000	507020	523410	340320
Pro-His	26635000	26654000	28020000	30869000	27111000	22677000	29804000	27425000	1358900	1053400	1155400	1421200	23476000	23647000	27055000	19667000
Pro-Ile	1663200	1673800	1823200	2047700	1916600	1486000	1819700	1576400	243880	242920	302760	298690	2494100	3689300	3269600	2354700
Pro-Val	4642800	4838600	5400100	4653200	5924700	4786400	5725300	4190100	227350	256050	279090	340560	821660	2145200	1817600	1377500
Ser-Leu	466140	507590	562660	623560	544750	428090	453990	504650	8885300	7799100	8847100	10061000	23297000	26429000	22131000	18963000
Ser-Phe	646090	488380	465590	572950	405430	337600	550840	690440	94729	137630	124330	176800	2767000	2567900	2068700	1782400
Tyr-Leu	390840	666040	530060	660640	3228100	1398200	3885400	2718100	131880	81583	46835	89746	124290	264550	95737	141810
Tyr-Phe	1491300	1369600	1444700	1727000	1523800	1166300	1579000	1742700	26105	26004	28463	22723	413300	494110	504400	330540
2-Hydroxy-2-methylbutanenitrile	115160	78026	119750	107150	57380	73820	106240	86190	85059	85563	73421	87135	144920	197870	243500	190810
3-Hydroxyphenylurea	4094500	4056300	4187000	3840000	5098100	5213100	4897200	4143900	5294200	5404600	5939500	5280200	3183000	3270900	3719100	3570800
Caffeine	29550	21524	41325	43229	45183	14980	44530	26124	33358	36402	28445	25592	33039	35725	81738	43579
LPE(0:0/20:4)	9	9	9	9	9	9	9	9	303870	379340	374250	500300	138050	159260	198380	113030
LPE(18:2/0:0)	1492100	1085200	784340	1344700	15087000	11018000	10998000	22241000	458840	346340	548650	545290	32239	9	9	9
N(Alpha)-Acetyl-Epsilon-(2-Propenal)Lysine	11676000	14125000	14167000	11307000	15186000	11496000	14193000	14560000	972660	892650	1149400	1295200	16409000	24968000	21520000	16601000
N-(1-Deoxy-1-fructosyl)phenylalanine	49922	45878	66607	35509	51552	43426	55214	62126	60222	71070	37969	44808	68814	46621	62247	59941
N-Acetyl-L-phenylalanine	768350	790620	801880	862720	794130	597220	813860	855290	408940	551740	639570	508730	5350400	7120700	4661600	5158100
Farnesylacetone	242620	139170	139480	39599	67454	89467	251560	246890	227050	158040	91866	70000	40249	70633	278190	175470
Cyclo(Pro-Leu)	7047700	7275600	7048200	7952300	6950100	6280900	7980100	8014500	419750	332220	491170	414520	7357100	9334500	9070500	6862300
Cyclo(Phe-Glu)	566000	574600	552520	484650	565810	511670	621200	613130	59352	103720	110160	95479	642290	733430	701870	582620
Cyclo(Pro-Glu)	748040	866380	892630	941410	1050000	679780	969990	886860	261160	188250	291010	215570	1031700	1293900	1220700	958810
Cyclo(Pro-Phe)	10079000	10600000	10483000	11926000	10679000	9118200	11057000	11884000	490040	500610	536560	588790	7937800	9978400	9142600	6781400
Cyclo(Pro-Pro)	980400	962640	998340	838890	949320	858510	1023900	795620	699120	682140	701650	749240	1405400	1425900	1318800	1225100
Cyclo(Pro-Val)	10098000	13282000	13076000	12623000	13840000	13086000	13349000	14594000	768890	682140	723340	800570	14697000	17974000	15060000	14368000
Cyclo(Ser-Pro)	11075000	11818000	11702000	13896000	15199000	11672000	12191000	10394000	1030200	1168600	1158600	1168500	13782000	12402000	14914000	13884000
Cyclo(Tyr-Ala)	2755600	2353400	2708100	2720300	2633300	2626400	2596300	2755300	152800	163920	161300	142490	3443600	3487200	3546000	2521600
Cyclo(Tyr-Leu)	1210900	1076500	965210	1375300	1376000	991420	1300300	1354000	28291	26201	27284	25240	568550	540410	614190	389490
Cyclo(Val-Ala)	1027600	879580	984740	1065600	1101500	1061100	1028400	1043000	181760	169650	163710	163320	636680	778330	717890	725520
Cyclopentylglycine	9	9	9	9	9	9	9	9	133940	95001	87229	120560	1365200	1619800	1250300	1488100
Ile-Asp	10563	21226	26784	5355.4	9	9	9	9	536680	588400	465580	637450	826830	1310700	1151400	748300
L-Aspartic acid-O-diglucoside	15982	29049	23615	13344	102510	85999	77308	128040	7979	13387	35685	9379.7	19490	9648.8	18022	27343
Leu-Leu	218520	260090	314310	189750	147890	84428	269610	124910	146130	104580	100370	104620	224720	264740	244720	183750
N-MethyTrans-4-Hydroxy-Proline	33827	25432	40753	19789	13338	21453	24591	24166	60998	59388	37302	51675	23525	66706	21413	34444
O-Acetyl-L-serine	55877	43541	77048	39061	102910	136560	82591	61252	383860	342550	390160	445500	2497400	3386600	2750500	2508900
Pro-Leu	9912300	10331000	9770100	12102000	11012000	12406000	18938000	17108000	656020	644380	950280	825070	2626800	6180500	6425900	5523800
Ser-Ile	523400	632370	524150	610330	522820	388330	478380	520140	8962700	7906600	8863500	10016000	22890000	26461000	22351000	19264000
2'-Deoxyinosine-5'-monophosphate	24168	57731	34729	25489	7385.9	3099.3	9959.9	19421	24547000	20313000	19655000	18437000	41109	77309	108200	86962
Eritadenine	18901	27402	6509.7	25890	9	9	9	3479.6	824280	774780	813110	762920	9	9	4838	11303
N6-(2-Hydroxyethyl)adenosine	120960	129280	93329	139090	63232	69917	45443	53187	26778	22253	18028	27620	424290	676360	313360	253180
3'-Deoxyadenosine	5505000	6622600	4061500	4810200	907800	1292600	1125600	1456100	20946000	11702000	9834600	9856500	5340400	7403200	7279000	4451300
2-Aminopurine	13369000	16778000	12055000	15564000	3234800	4988700	4727800	4477200	16590000	6931100	11285000	10048000	13489000	37109000	21843000	12986000
2-Hydroxyadenosine	85480000	127150000	91588000	69686000	30579000	8456300	34533000	19259000	36732000	5926600	20715000	15220000	54576000	54425000	59280000	24062000
N6-(4-hydroxybenzyl)adnine riboside	81160	103900	108480	102220	65468	96526	81649	71133	92368	73256	90908	80063	89130	87339	67905	79515
Ribosyladenosine	11513	31899	27300	34834	9	9	9	9	60877	106050	88661	65736	91115	72514	105180	60588
S-(Methyl)glutathione	35948	41682	39105	20938	27127	20954	31987	41950	336590	109760	168440	135590	104500	87464	101290	83244
S-Allyl-L-cysteine	7049.9	2810.7	3760.2	9	9	9	9	9	351470	310040	297430	230060	681580	482260	441420	309520
L-Lysine-Butanoic Acid	15011000	13973000	15747000	12738000	13899000	15663000	16552000	13718000	34662000	45196000	22791000	35092000	209570000	170630000	165770000	193530000
L-Methionine methyl ester	9	9	9	9	9	9	9	9	209460	169630	201780	263840	426030	564000	701500	252730
D-Proline betaine	15283	31059	10359	16791	9	25020	9	12213	41686	67729	48348	65275	38703	51420	41069	32346
2-Methyl-1-Pyrroline	545810	533610	467170	561170	1735700	1011500	1358400	1525200	359180	388610	341020	335960	2176900	911040	902840	817140
Glu-Pro	1580300	1500100	1582200	1618100	1818300	1542200	1534200	1264900	364520	247100	414950	510900	2000600	2527900	2136300	1732600
His-Val	2622000	2418700	2391300	2743700	2663100	2176900	2901800	2419900	313160	311960	323640	371510	2218000	3087700	2554200	2579900
Hydroxyurea	2444400	2069600	1105000	1718100	783150	1724400	1874200	2276700	290020	320320	636430	255280	3339700	5657400	4200600	4153600
Melibiose	179820	114950	142780	140490	89608	147580	104680	85168	77184	73656	46154	87748	166420	200190	219570	195080
N6-Isopentenyladenosine	706020	583190	683990	738440	346960	364400	383790	423480	44325	36059	43275	45810	572460	1106600	624330	530750
N-Formylglycine	8268400	7804900	9231900	8057500	7897100	8794600	8542700	8686300	3951800	4878900	3104400	4448700	3241500	2819300	4355500	2633200
2,3-Diaminopropionic acid	9	9	9	9	9	9	9	9	185150	223080	107690	156560	9	9	9	9
D-Pyroglutamic acid	3461900	3360200	3770000	2943500	4963100	3509300	4151200	2612300	709640	1110600	551670	889270	15454000	17655000	15812000	15915000
Aminolevulinic acid	126850	70681	79032	84411	110890	99264	84793	54068	4277900	4434700	3655900	4852900	14525	23489	8401.5	19688
D-Ornithine	2816900	2792200	3051600	2992100	2983700	3476800	3799700	3135800	1801400	1291500	1435700	1662500	506880	492080	614830	496320
3-Methyloxindole	9	9	9	9	9	9	9	9	15066	32020	23431	31807	28097	33106	21067	20015
2-Hydroxy-4-(methylthio)butyric acid	35094	53597	28152	50567	38478	72285	35126	56597	36321	28764	39540	32209	32777	31423	27884	32717
Ancitabine	6237.9	9	9	9	3848	4386.2	8248.2	2564.7	18165	19600	5916.6	16329	11259	3114	9	11225
N-Acetyl-Asp-Glu	9	9	9	9	9	9	9	9	329230	297950	259810	390960	354180	370500	512910	401610
Phenethylamine	43793000	42389000	42985000	45391000	40733000	39365000	46263000	34234000	42929	9	9	9	81580000	114940000	113610000	99174000
3,6,9,12,15,18,21-Heptaoxatricosane-21,23-diol	1347500	1307500	1389400	1165800	1403300	1272000	1597100	2029000	867950	1090800	906280	916500	973170	857360	739100	845740
1,2,3,4-Tetrahydro-b-carboline-1,3-dicarboxylic acid	2445600	2319300	2374000	2660900	2596500	2092600	2626600	2809500	172920	145660	159700	171390	2694400	3517200	2850300	2412800
Ajmalicine	9	9	9	9	9	9	9	9	139800	162110	87714	79167	9	9	9	9
Berberine	16318	17423	20114	28376	17983	21134	17593	21078	17248	18131	22793	33281	17348	12200	17163	20200
Cytochalasin A	12902000	10515000	9992000	14666000	13338000	11773000	14802000	16650000	596120	402020	538420	612290	101800	160310	159010	113430
Cytochalasin B	16721	18920	16311	20666	38580	55333	64728	78634	60407	39906	47394	41693	10313	17268	12269	8688.6
Dihydromorphine	5573900	5962200	5057000	5104900	6525200	4558300	6427100	5918600	208810	132860	204490	183870	5193100	5792700	5788400	3867500
Ibogaine	479240	454760	453440	501560	492560	485480	449650	468260	502130	485410	547930	483150	462340	552480	502210	497140
Palmatine	16343	16583	21837	19638	18397	19844	22748	21734	19142	18009	19621	19229	11692	13735	18294	10519
Pilocarpine	28698	33483	36143	36863	31109	39706	32544	31956	28170	37392	26716	20776	31232	36638	26658	24468
Piperolactam A	455380	436450	494190	487670	446450	471260	481460	519930	485240	554130	444070	471470	533350	584820	569060	513570
Ranitidine	534370	561630	548500	473040	549030	551170	557200	530220	553830	574310	599480	640320	649700	701320	747400	641000
Sinomenine	160290	155520	159230	185310	185610	140470	189770	204980	25890	18695	20634	26998	210420	296490	220850	177450
Sparteine	130220	124650	123320	171090	163900	122610	134180	136320	132950	160150	155910	124300	125410	113290	124440	111500
strychnine N-oxide	3352200	4271600	3216800	3645600	3741500	2586100	3621100	4405900	87933	28151	83111	78421	1331300	1685400	1881900	954470
Yohimbine	2706100	2109700	2823200	2398200	1257500	1233600	1463100	1534200	608080	545920	653460	580630	1002300	1339800	1261900	1071700
(E)-7-[2-Morpholin-4-yl-3-oxo-5-[(4-phenylphenyl)methoxy]cyclopentyl]hept-4-enoic acid	9	9	9	9	9	9	9	9	1047300	902110	883040	763720	9	9	9	9
[6]-Gingerol	483520	422470	531800	375230	277940	302490	352560	249850	334700	244120	299810	360810	256500	294540	317500	335620
1-(2,4-Dichlorophenyl)-2-(1-imidazolyl)ethanol	3291200	3263500	3264400	3670300	3627200	2950700	3738000	4248600	146560	149090	142460	158330	2904000	3776800	3057600	2629900
14-Methoxy-4,4-bisnor-4,8,11,13-podocarpatetraen-3-one	4030200	4065400	4664200	4441800	4897500	5165600	4073800	5228800	4687600	4834900	4472100	4304100	4000100	3676000	4023500	4558600
1-Nitropyrene	232730	197920	272340	266340	297790	292840	290500	331950	7722.5	4097.6	4952	3355.4	194010	210140	178510	163680
1-Trifluoromethoxyphenyl-3-(1-propionylpiperidin-4-yl)urea	9466.2	5015.6	8213.7	8647.1	20349	8653.2	65712	15806	13465	25170	21621	43342	9	9	9	9
2,3-Dihydro-2,3-dihydroxy-4-(4-hydroxyphenyl)-1H-phenalen-1-one	236340	268410	247180	279400	291550	318680	303980	347560	240570	246750	273240	384360	287420	288990	302200	250420
2,4-Dihydroxybenzophenone	9380	11569	13868	9976.2	14025	15570	8318.3	13903	12749	16566	11339	13466	13537	15353	16344	12175
2,4-Dinitrophenol	11877	14106	18331	11559	14710	13742	15053	15593	16209	16275	12177	15308	16450	19145	14441	12125
2,6-Di-tert-butyl-1,4-benzenediol	20327	25391	24309	23277	27488	21487	23760	27423	26834	28020	27882	32117	27191	25738	27112	27424
2,6-Di-tert-butyl-4-hydroxymethylphenol	14718000	15477000	14608000	13758000	11349000	12997000	10669000	10507000	15243000	16131000	16733000	17401000	15952000	16744000	17823000	17233000
2-Cyano-3-[3-ethoxy-4-hydroxy-5-[(phenylthio)methyl]phenyl]-2-propenamide	16035	21549	14146	15331	1824.7	2067.9	2961.1	2540.9	306400	365540	278450	324500	1663800	2568000	1326500	1435800
2-hydroxy-2-[4-hydroxy-3-(3-methylbut-2-en-1-yl)phenyl]acetic acid	21700	20520	20675	24928	14603	10182	45381	15675	17858	17799	13067	23794	446380	763460	659500	443720
3,3'-Dimethoxybenzidine	1547500	1359900	1491400	1708200	1752400	1577500	1815900	1719100	16398	9009.5	15869	5956.5	1352500	1586900	1021700	802350
3-Methoxy-4-hydroxyphenylglycolaldehyde	426680	299010	382680	356280	3640700	2242900	3417800	3806400	135980	139770	189110	195800	1063500	1118800	1504500	1074900
3-O-Methylgallic acid	905280	891110	922220	860800	954610	913900	877590	801400	849190	949000	911130	959850	991580	897410	915570	904970
4,4'-Methylenebis(2-methylaniline)	9	9	9	9	9	9	9	9	1343900	1322200	1144300	845150	30981	36787	26445	29636
4-Fluoro-3-nitrobenzotrifluoride	222930	210200	234760	235120	232450	250200	252220	254360	286290	316770	298960	284200	221990	229870	221220	242700
9,10-Phenanthrenequinone	5438700	5682900	5670400	5432100	5514000	6230100	5697800	5877800	5496100	5298200	5577800	5514200	4553500	4478400	4799300	4331500
Alprenolol	3438100	3229900	2864900	3484600	1728200	1772900	1619900	2235100	123070	103220	106160	99413	1169700	1623000	1785600	1218700
Antimycin A1	9	9	9	9	9	9	9	9	165900	122760	121010	138190	9	9	9	9
Benzamidine	7474200	7670500	8388400	7975800	7411900	8608900	8788900	8132400	8619000	8518200	9442300	8977500	8398100	8317700	9220200	9343500
Benzeneacetamide, N-[5-(1-methylethyl)-2-thiazolyl]-	316790	314120	285960	354810	345040	323350	408770	407940	3101200	3706000	3838300	5793400	2831800	3427600	3144100	2133100
Benzyl ethyl ether	467230	575360	484160	473850	515350	652420	427800	574720	1845300	1959700	2124600	1851900	2010000	3327500	2228100	1273400
Betaxolol	7716.8	28805	29118	17970	5936.2	7667.3	10336	23173	31817	21600	13334	5823.6	10581	17829	35979	16965
Bisphenol A diglycidyl ether	23440	565880	4854800	45000	226600	232190	16973000	39638	9	9	9	9	9	9	9	9
Chloroxuron	1332600	1229700	1452900	1369800	1443700	1492600	1484000	1536800	1503400	1421100	1371500	1619500	1584800	1706500	1587900	1593700
Citalopram	187350	177480	172240	203850	227330	171700	215120	256920	12174	9549.8	10226	13098	378820	534750	402080	386620
Crotamiton	185200	164320	198330	154790	175630	249260	207840	189580	479110	439190	394400	461570	443900	495250	407920	384800
Cymiazole	366770	278380	359910	413760	453280	449560	412180	467410	15930	10115	13466	10534	277230	303290	283060	250010
Dapsone	118520	132380	106920	114050	35725	42320	34773	36830	782680	929980	721850	797980	1198200	1349600	1089200	1131500
Dioctyl phthalate	1843900	2192300	1361100	2707100	1200600	1767500	2179300	2490600	23937	20500	36611	34242	2997600	3548400	2643100	1591700
Diphenidol	180610	124200	139810	173130	148630	117000	181690	202180	9669.8	4860.3	6551.4	4265.3	94433	110650	98612	77332
Diphenylmethylphosphine oxide	306610	237280	335940	372600	412040	368110	353570	647960	9	9	9	9	258170	296130	272080	219320
Fluometuron	426200	408960	446180	432540	460470	491230	482630	491630	485480	491790	418060	470730	432180	439270	412970	468210
Gentian Violet	1767900	1222100	1801800	2297500	139730	186080	3811400	154230	112430	154020	157710	142470	129950	123680	130060	130250
Halopemide	9	9	9	9	9	9	9	9	9	5478.3	7216.3	17838	32685	62463	61285	24945
Irbesartan	159080	152470	157950	189410	175670	126400	196280	199940	5433.9	4293.1	5302.2	6600.8	113470	158550	138500	111130
Leonurine	464790	472150	448080	496990	432680	398180	512640	508610	96147	106160	103770	94782	762670	1025400	954820	771920
Lidocaine	7956300	7635300	6916800	7686000	8275500	8729100	8409700	7024000	8175900	8510400	7751100	7947300	7471600	8964500	8819000	7382700
Metolachlor	428670	389000	298620	509470	386880	330900	432260	443200	280840	244170	289750	260890	185790	262540	238670	148210
N-(2-Phenylphenyl)-8-[4-(3-pyridinyl)-1-triazolyl]octanamide	22321	25600	22591	30629	26033	31277	31049	47027	144180	100080	117200	168930	16419	35458	27544	27140
N-Methylanthranilic acid	538810	442990	514650	544910	556270	555050	494280	539090	69904	55865	56655	63047	373530	464090	433360	384140
Norverapamil	36731	25497	31503	34818	38544	29247	45032	53781	3919.2	3130	9	4283.5	9	9	9	9
Octoxinol	1210200	1318400	1349500	1340400	1390900	1459100	1398200	1301200	1340500	1356100	1420700	1336000	1599100	1568000	1557200	1478100
Paradol	208560	168210	188530	192770	92113	92120	157230	101580	92085	138350	118370	91538	83866	111430	99607	103170
Pentoxifylline	9	9	9	9	9	9	9	9	482420	624280	564020	435830	2303800	1335300	1391000	1611500
Phytanic acid	223630	256650	310010	262420	144140	229450	243500	276280	20164	16939	14887	16279	19716	26599	15003	8339
Pioglitazone	9	9	9	9	9	9	9	9	64034	74953	68269	52794	303030	213770	224330	242840
Piperidine, 4-(5H-dibenzo[a,d]cyclohepten-5-ylidene)-1-[4-(2H-tetrazol-5-yl)butyl]-	15383000	14619000	12915000	17570000	33088000	31677000	36993000	40811000	1140100	789280	911540	1276300	251120	333770	250220	191520
Promethazine	1149500	1078400	1078200	1270000	1212700	1007100	1393200	1238700	25580	33139	39522	46313	599040	547910	627620	405540
Spectinomycin	847450	881140	672230	1110000	1648000	716890	1791800	1303900	31110	21217	33883	46463	823880	804070	953890	396010
Sudan I	137750	110750	148590	140020	150990	157060	145940	174180	8143.4	7201.9	7434.8	4572.5	106100	109900	94543	87000
Sulfadimethoxine	4107.7	3792.4	9	9	9	9	9	9	54196	66230	34466	48373	9	9	9	9
Sulfapyridine	1426200	1429800	1594100	1445000	1417500	1689600	1428000	1456800	1804500	1990700	1626800	1622600	1264500	1160300	1173800	1360100
Tribenzylamine N-oxide	7152400	7147900	5659000	9012000	10055000	6073500	11378000	11014000	439330	277210	305660	367120	2746900	1362000	2585700	1063200
Undecanamide, N-cyclopropyl-11-(2-hexyl-5-hydroxyphenoxy)-	376200	324120	222400	455630	1978000	1690100	2158600	2275300	181870	158600	150920	269640	268070	346730	371940	241000
Uralenneoside	9	9	9	9	9	9	9	9	22711	24252	29886	32895	832510	1035100	1156300	1205800
Vanylglycol	12802000	13030000	13759000	11933000	12234000	11216000	13045000	12592000	3994300	6101000	5840900	5928400	12761000	13612000	12921000	13594000
Vardenafil	4037500	4469200	3913300	4643100	4420200	3783500	4418900	4492900	176540	124530	160810	207580	1767900	1345500	1606300	1033100
(25S)-7-Dafachronic acid	9	9	9	9	9	9	9	9	87060	68903	98373	89061	25396	39017	28642	26293
(2R)-2,4-Dihydroxy-3,3-dimethylbutanoic acid	117320	132380	106710	133270	58951	59690	66710	74421	3697400	3355500	2888100	3024900	3042500	4615900	2921900	3290200
(R)-1-O-[b-D-Glucopyranosyl-(1->6)-b-D-glucopyranoside]-1,3-octanediol	68777	75541	63281	77342	87466	64595	89754	90106	9	9	9	9	74959	90415	78521	58274
1-(9Z-hexadecenoyl)-glycero-3-phosphate	470130	434090	430390	555790	924680	937460	1037000	1088400	25296	14186	17484	25631	40256	67646	59724	39482
1,2-Dioctanoyl-sn-glycerol	577080	524810	591690	540130	1313800	1261100	1180100	1561000	61025	86705	78962	88053	72243	81875	83774	80052
10,20-Dihydroxyeicosanoic acid	132170	113770	122510	129880	63986	67588	59471	74438	60847	55478	50698	62491	26439	27955	38814	39894
10-Hydroxymyristic acid methyl ester	2527900	2058000	2102300	2827500	1847900	1806900	2055500	2563500	16840	22719	14078	11164	5737.6	3261.3	6689.8	7949.9
14,15-Leukotriene E4	9	9	9	9	9	9	9	9	94537	47033	60025	57879	9	9	9	9
15-Ketoprostaglandin E1	832540	918770	942890	792200	892220	861320	913830	888250	848640	868840	862600	855830	904810	947220	1009400	914530
15-OxoEDE	10534000	7722700	8412000	9853700	8149700	9057700	9782700	9979800	203250	168140	183220	157640	94280	188520	156430	123260
16,16-dimethyl-PGE2	360550	343120	681860	563720	586780	484480	519070	652730	214220	219040	183560	212170	215370	233690	234480	184810
16-Glucuronide-estriol	97701	68680	102070	79760	75799	89284	112940	90936	99066	96151	93778	103710	109450	114700	99296	92676
1-eicosanoyl-glycero-3-phosphate	7713600	6621900	6143300	8305500	10601000	10611000	11790000	11737000	387710	225090	205700	312900	725320	1239400	906180	771450
1-Heptadecanoylglycerophosphoethanolamine	12173000	13079000	9798500	11646000	16519000	17613000	19672000	20713000	596160	406480	529900	481510	419330	921110	725700	698190
1-Hexadecyl lysophosphatidic acid	168650	134410	153250	228090	240350	217580	247960	294150	28267	19327	28526	18563	17938	32407	23379	22202
1-Hexanol arabinosylglucoside	3369400	3216700	3119700	3699500	3475600	3126200	3578100	3890400	210420	178110	194090	210650	4420700	5202600	4490500	3678600
1-Hydroxy Vitamin D2	283150	221290	224040	377880	637540	520710	787720	807230	5549	13275	9552.9	7228.7	35551	47344	47583	33638
1-Myristoyl-2-hydroxy-sn-glycero-3-phosphoethanolamine	31813	26246	24194	45058	135990	123360	149990	188610	8145.5	4196.8	6027.2	15250	9	9	9	9
1-Palmitoylglycerol	153000	133130	135100	121560	121780	156210	253370	217840	75087	67959	52700	53783	158390	123610	105690	179120
1-Stearoylglycerophosphoserine	2658900	2249200	2090300	2870700	5012200	4860400	5641300	5897100	1370000	1061200	994670	1609700	227870	314970	236060	181270
2,2,4,4,-Tetramethyl-6-(1-oxopropyl)-1,3,5-cyclohexanetrione	9	9	9	9	9	9	9	9	844830	812560	641650	516950	14635	23127	16094	17049
2,4-Dihydroxyheptadec-16-ynyl acetate	80722	83254	87300	104760	101160	87854	69683	92319	82329	77520	67498	107060	87195	93307	88112	91158
20-hydroxy N-Arachidonoyl Taurine	9	9	9	9	9	9	9	9	17460	9977.7	11077	12559	1821.7	5020	1907.6	1918.8
28-Homobrassinolide	103220	101170	111020	108730	102870	99073	112470	94740	108990	120250	105820	112910	128690	111160	126940	118890
2-Stearoylglycerophosphoglycerol	8328100	8860600	8681200	8785700	4716100	4529900	6108900	6145500	5427700	3905500	3906800	5075800	1694700	1761200	1519800	1233300
3,4-Dimethyl-5-Propyl-2-Furantridecanoic Acid	40639	14398	15293	44388	27353	30151	17086	20974	9	9	9	9	3364.9	11888	4687.2	2434.9
3a,7a,12a,19-Tetrahydroxy-5b-cholanoic acid	9	9	9	9	9	9	9	9	31865	25768	33557	24972	9	9	9	9
3-Hydroxy-8'-apo-epsilon-caroten-8'-al	9	9	9	9	9	9	9	9	104310	43207	75705	76332	60537	116760	80498	45151
3-hydroxypristanic acid	9	9	9	9	9	9	9	9	4042.4	4739.6	4744.5	3499.6	3330.3	4972.1	1780.9	1281.4
3-Hydroxysintaxanthin	618860	774860	750990	737040	835280	652330	726040	748920	700640	670630	748760	746500	688960	741870	655280	783180
4-Androsten-17β-ol-3-one glucosiduronate	126660	157230	118720	138400	126090	101170	195260	148930	9	9	9	9	2342600	2768000	2343300	1779400
4-O-Methylmelleolide	3067000	2003900	2890600	3259100	1005200	1606500	1943800	895380	1043500	1115600	1029400	1043500	1195800	1604900	907210	957370
5-Androstene-3β,17β-diol	12668000	12034000	12245000	12724000	10687000	11381000	11495000	12145000	241170	190580	120860	137190	198060	230960	192130	151440
6-Maleimidocaproic acid	758300	468350	783500	689930	3430600	2157400	3882200	3794500	282170	368200	507550	481340	1315400	1090300	1591500	936010
7alpha-Hydroxy-3-oxo-4-cholestenoate	9	9	9	9	9	9	9	9	8847.6	6384.2	6521.2	7653.1	3761.2	5528.3	3865.1	2627.6
7-Dehydrocholesterol	9	9	9	9	9	9	9	9	77406	49056	55244	68107	35530	41044	44839	33598
7-Oxo-11-dodecenoic acid	19918	21042	19658	22334	75485	63094	21384	77527	18836	21120	16968	12058	16271	20870	16063	17879
8-Geranyl-7-hydroxycoumarin	156550	125880	116840	162730	54773	61113	58101	64699	33975	48783	27399	16323	11558	6842.3	12644	9483.2
All-trans-Pentaprenyl diphosphate	4223500	3722700	2985400	4236800	5378000	5602700	6624800	6672200	387910	247000	231200	299210	949060	1295900	1007400	925210
Androsta-1,4-diene-3,17-dione	938180	901720	915310	929230	770780	873170	808370	814180	945260	1014500	868130	867560	862930	911280	822860	883720
Armillarin	2989000	1104500	2240900	2062000	146750	165060	364090	163800	1230900	1217600	1413100	1427000	1197900	2403500	1291300	1398300
Avocadene acetate	9	9	9	9	9	9	9	9	256550	228130	229140	206930	154810	226580	225680	132770
beta-Doradecin	60895	68368	67813	69376	63778	38714	71675	55997	81598	80034	53277	79427	69438	66747	46339	67323
beta-Sitostenone	648460	608520	572710	692870	1470500	1042100	1870400	1614000	40579	34598	46831	25293	40546	69818	68442	63950
Camelledionol	89656	97730	96165	114060	120110	153300	129760	128410	112690	148630	126270	144710	161990	181170	135930	157020
Citronellyl acetate	55853	58540	60372	68905	59842	57237	76523	74387	92140	96158	106170	90381	132920	166270	167360	153850
Citroxanthin	3373400	2915900	3533500	3222500	3898400	3398300	2895400	2561700	3374500	3570000	2604600	3020100	3029200	2875700	2787200	3130500
Cortolone	546340	367110	576410	633230	1357700	803870	1302500	1481700	7252.7	1998.3	4863.6	2162.3	93156	140730	122500	73167
Demethylphylloquinone	6830300	4488700	6936400	7684500	2470000	3359400	6141500	2845600	2473700	2302900	1949300	2095900	2290800	2793400	1838600	1864000
Digitoxin	492580	631060	530240	701120	819500	496860	776830	739160	9	9	9	9	422440	513910	412370	330720
Dimethylallyl diphosphate	337010	333620	308040	407610	265320	210820	359390	391860	812350	703760	617820	688500	2748000	3557600	3285400	3755800
Dydrogesterone	54954	53332	51921	38994	51579	56792	49115	56014	45357	41091	39369	41104	74512	36935	64026	69806
Eplerenone	9	9	9	9	9	9	9	9	102940	73242	79138	81256	9	9	9	9
Estradiol valerate	34314	38204	34414	32704	34988	38802	39247	43105	36640	37917	37114	32892	37568	36827	32223	32236
Ethyl 3-hydroxytridecanoate	9	9	9	16459	9	9	9	9	112830	82591	82177	83365	203140	278390	288210	181340
Fasciculic acid B	41130	38371	26411	53663	49973	52677	49546	52091	9	9	9	9	9	9	9	9
Glycerophospho-N-Oleoyl Ethanolamine	164520	105590	116550	124470	5668800	4685000	6264100	7212400	114400	80937	49515	177040	241710	238790	181760	188670
Glycerophospho-N-palmitoylethanolamine	68379	67968	70817	96551	3362200	2932300	2828800	3707000	12311	9	9	9	9	28167	30195	13966
Glycochenodeoxycholic acid 7-sulfate	9	9	9	9	9	9	9	9	735780	503870	599090	614900	9	9	9	9
Hecogenin	9	9	9	9	9	9	9	9	123370	109710	118510	120720	70978	74608	78797	64583
Leukotriene A4	9	9	9	9	9	9	9	9	25875	22207	21221	22845	24714	26224	29588	17092
Lucyoside K	622030	554720	618330	497850	497690	442180	443610	423610	934260	916260	857730	872320	388210	380900	344340	296030
Lyngbic acid	8228400	8068300	7299600	7768300	8334600	7700700	7377100	6974700	7448500	8314900	8267400	7745700	7563300	7505900	7845800	7756400
Mesaconitine	3084300	3710900	2983500	4042700	3422100	2342400	4089700	3403800	88741	106350	115100	132560	2244100	2945600	2529300	1780100
Methyl myristoleate	26097	14335	24266	20966	101410	133990	175920	194380	517600	404090	635020	524300	1163400	1661600	1563700	1053800
Methylprednisolone succinate	6157300	4430000	6774800	7680600	2133500	3127500	5573200	2654400	2236700	2105200	1719200	2042300	2264800	2651300	1665700	1988100
MG(0:0/20:1(11Z)/0:0)	6690200	7596300	7003200	6920500	5936400	6177600	6580900	6392700	6824500	7690700	7615200	6567000	7275700	7228800	7891400	7734500
MG(15:0/0:0/0:0)	127850	129770	144880	123480	130090	145810	135440	109170	207650	232350	208030	223680	190110	177430	229450	237690
Muricatacin	1258400	1124000	1082100	1178900	1082300	986020	1287000	1064600	1152500	1186100	1100600	974630	1033200	1026800	998810	949220
N,2,3-Trimethyl-2-(1-methylethyl)butanamide	53449	56603	66358	62278	38149	49119	59229	62288	26941	25747	31063	22797	33603	56299	54180	42122
N,N-Bis(2-hydroxyethyl)dodecanamide	477740	258680	1705500	837990	121150	372530	596950	284840	34125	40058	38460	39347	135120	605720	91580	88966
N-Octanoylsphingosine	122490	222260	216490	207340	278620	196380	184300	191080	153660	140850	141700	122440	151960	136150	153440	148620
N-Stearoyltaurine	140200	126480	119270	130700	328130	206700	402280	324620	7244.5	9	9	9	11691	12887	14527	12394
Oct-1-en-3-yl 6-O-pentopyranosylhexopyranoside	497870	556940	507820	592160	506800	458140	570360	594910	20038	14983	16027	21870	288880	211650	273700	159960
Oxfendazole	652820	659540	674010	624140	665900	742170	711690	691540	882740	979290	792340	803860	670170	648660	665680	741660
Palmitelaidic acid	9	9	9	9	9	9	9	9	92747	88951	94430	100920	120120	177900	140070	137000
Palmitoylserinol	15158	9356.1	8621	12206	18631	9386.5	18233	17249	535450	418500	473700	544110	256270	350000	335370	228570
Prostaglandin E2 p-acetamidophenyl ester	90861	85396	91011	117200	333580	320180	379690	401710	125310	112700	120380	125520	73338	92745	66601	67118
Prostratin	221550	187430	222630	211440	225440	222630	254230	290090	236690	264310	325480	260980	354980	387830	351070	346910
Psychosine	9	9	9	9	9	9	9	9	83236	78431	80799	97689	49098	65969	46125	44272
Ricinoleic acid methyl ester	112490	95074	98494	120270	89471	94361	98396	109600	116170	82851	85684	94794	106440	123980	82815	109070
Santonin	301310	261950	247170	311650	296880	231570	306040	364540	4345.3	3782.3	4540.8	4518.4	143000	180360	151190	122750
Sorbitan monopalmitate	2169700	2032300	2117400	2308400	1930000	1908100	2258300	2502400	78657	78223	67009	72666	68732	93376	76507	85861
Stearoyl-L-carnitine	22348	15498	20953	16659	20363	21357	25199	19989	21856	21879	18316	17623	20075	22048	20317	20785
Sulfaphenazole	91272	84020	97524	91546	84873	114960	100640	106490	146750	185200	158720	160410	63190	59986	71477	79393
Tetradecanal	24368	27399	23318	19391	49389	66829	82981	84276	44659	29268	29938	23145	153300	242130	213670	177420
Toxin T2 tetrol	301130	283100	314480	492110	222270	236740	320420	233890	197880	259780	265610	186960	235060	272980	197710	170480
Triamcinolone	142380	130820	157620	159220	132570	152610	158460	176270	144620	122500	148320	109920	105790	126450	108160	85940
Tricaproin	491760	489410	506190	543640	460730	587830	523450	351070	570900	545600	502400	659360	595270	536710	578110	570170
Vitamin K	916200	806620	782720	683120	813300	915340	816260	707750	924110	830890	704770	759560	693340	889020	821850	832540
xi-5-Hydroxydodecanoic acid	17123	10934	26491	27067	17575	39264	25824	29447	62881	50884	60332	52000	50545	85261	67146	48223
β-Estradiol 3-sulfate	52430	36224	53402	32463	26788	32956	37017	18572	35594	25451	33166	34244	22069	28393	28040	29521
3'-O-Methylguanosine	10423	12973	7767.6	11187	9	8332.6	4347	5588.6	1729200	1596200	1574200	1608400	719690	1103300	701200	931350
dTDP-D-glucose	9	9	6767.7	9	9	9	9	9	767180	676600	627750	548180	15714	28270	18591	18729
Thioinosinic acid	32184	26104	22389	33206	10966	15256	33649	19798	9390100	3242200	5613100	5235200	698450	600040	623920	628840
Thymidine-5'-diphosphate	16883	9186	9	9	9	9	9	9	94671	67903	66646	103190	8662.3	9097.8	13246	14608
UDP-N-acetylmuraminate	9	17046	9	17529	9	9	9	9	1731400	1059500	1082800	1506600	1020000	1647100	1581600	1216600
Zalcitabine	360800	307700	326340	360120	347840	311320	329360	355350	34673	24553	31602	23243	309490	353520	395750	302190
(-)-Indolactam V	6537000	7758900	6704000	8563600	10174000	5737300	10236000	11140000	360970	347980	359820	455740	6112700	5496700	6289200	3655200
(2S)-2-Isopropyl-3-oxosuccinate	9	9	9	9	9	9	9	9	79050	61222	59233	49076	71064	83451	72114	68362
(3R)-3-Hydroxy-2-oxo-4-phosphonooxybutanoate	9	9	9	9	9	9	9	9	1866400	2332400	642920	2267100	2221800	2842300	3190200	673540
(S)-2-Acetyl-2-hydroxybutanoic acid	15873	15046	15996	13851	13146	13577	10778	11856	13572	13681	12247	10425	8301.9	8837.3	12258	10973
1,3-Thiazolidine-4-carboxylic acid	9	9	9	9	9	9	9	9	5271800	2629600	8227200	5784200	673460	748100	675270	601950
2,2,4-Trimethyl-1,3-pentanediol diisobutyrate	97681	110980	98690	84448	102500	70607	78317	74127	77463	91556	89622	81238	76831	78342	72543	83890
2-amino-4-({1-[(carboxymethyl)-C-hydroxycarbonimidoyl]-2-{[(4S)-4,10,14,16-tetrahydroxy-5,9,11,13,13-pentamethyl-2-[1-(2-methyl-1,3-thiazol-4-yl)prop-1-en-2-yl]-12-oxo-1-azacyclohexadec-1(16)-en-5-yl]sulfanyl}ethyl}-C-hydroxycarbonimidoyl)butanoic acid	327790	400270	352210	445920	476860	329480	500510	493990	21978	21670	13390	13907	202820	182620	230100	91605
2-Phthalimidoglutaric acid	94903	101180	87256	96500	53318	43266	58900	66107	13242000	4946200	6599200	6320200	1314300	3932300	1085800	1570500
3-Dehydroquinic acid	4018.7	7001.6	8781.8	4465.5	3937	6006.3	2948.7	6381	2199600	1285100	1312000	1297800	50012	65149	48112	54352
3-Hydroxycapric acid	42789	39602	33533	45637	34663	32966	38643	49619	36561	31040	52963	34878	18509	15478	11359	13991
3-Oxododecanoic acid	11314	13053	12291	9971.4	10282	7922.1	13005	14544	21824	14723	12029	13729	13869	18103	21355	14005
Acetylleucine	158610	187260	128550	164940	57017	51072	63409	61844	687920	694590	745760	641500	4053700	6841700	4166200	4081900
Ala-Val-OH	193410	174790	164320	233140	40635	52087	49318	75235	9	9	9	9	2731600	2678900	3649200	1872600
Amastatin	6115700	6401100	5644700	6814300	8366200	5913400	8080100	8782600	191550	117740	170510	145620	624130	1089000	1555300	1079000
Asn Phe Arg	5042600	5867000	4586200	6798000	6562700	5277100	6987900	6666900	157520	165180	173420	262490	3975400	4285100	4181800	3600100
Asp Phe Arg	4039600	5988000	3199300	7102800	14229000	7687000	18358000	17040000	52404	24824	49738	40133	927210	2257500	851580	1010800
Benzeneacetamide, N-[(1S)-2-[[(7S)-6,7-dihydro-5-methyl-6-oxo-5H-dibenz[b,d]azepin-7-yl]amino]-1-methyl-2-oxoethyl]-3,5-difluoro-alpha-hydroxy-, (alphaS)-	248930	306550	291920	299670	390260	242760	388450	353280	10743	5843.1	10000	10238	313400	399760	367790	250480
Benzoic acid, 3-[[(3-carboxycyclohexyl)amino]carbonyl]-4-[3-[4-(4-phenoxybutoxy)phenyl]propoxy]-	9	9	9	9	9	9	9	9	198740	125480	153580	108860	9	9	9	9
Cys His Arg	9	9	9	9	9	9	9	9	2018300	1921300	2253300	2185300	9	9	9	9
Cys Ser	9	9	9	9	9	9	9	9	3396000	1499300	2325300	2159000	30358	48775	39045	31390
D-Arginine	9	9	9	9	9	9	9	9	25486000	24173000	27352000	25308000	594130	461940	475830	330810
D-erythro-Imidazolylglycerol phosphate	9	9	9	9	31831	11087	9	9	2953900	2267400	638270	4165600	369120	735370	386940	93221
D-Galactonic acid	360890	414010	308260	311330	187870	165520	203300	180630	421900	402460	616910	464000	2112900	2165600	2189700	1823700
D-Pantethine	352820	442960	451500	709520	1104900	358030	2452400	1020200	110300	90864	108780	128390	110190	45866	65451	35635
gamma-L-Glutamylputrescine	9	9	9	9	9	9	9	9	14296000	10091000	18859000	11167000	9	9	9	9
Glu Ala Lys	367320	421700	280740	321730	845770	367030	972440	756190	2511900	2476100	2363900	2676300	853640	1417400	1060300	727820
Glu Asp Ile	5137700	5238600	5476600	5231100	2867000	4617300	3866400	3732800	433780	180600	517630	315560	493110	1248300	1020600	284480
Glu Ile Ser	4414700	4634100	4414100	4211800	5072700	4118600	4867300	4486200	1757400	2196300	2981200	1980200	12140000	14115000	13541000	11108000
Glu Leu Lys	484230	517990	505870	533580	550080	443460	505250	507790	626070	633280	876520	721320	2511800	4940100	3106900	2368400
Glu Met	6810900	7050600	7134600	6771400	7077900	4818600	6976900	7165700	20969000	9675900	15489000	12457000	10802000	14591000	11879000	7258100
Glu Pro Lys	9	9	9	9	9	9	9	9	4712400	3564500	4825500	4098900	9	9	9	9
Glu Val Val	260820	241740	258920	268230	233610	155170	153800	170880	3039900	2416000	3478700	3653100	6067700	8038100	7980700	5727600
Glu-Ala	11407000	12831000	13469000	11788000	12940000	11366000	14682000	12961000	428210	447230	396540	599000	11634000	14734000	13460000	11489000
Glu-Asn	6277100	7527100	6618000	8342500	12630000	9041300	12417000	13111000	37908	57009	41596	50563	63417	200850	133540	199760
Glu-His	2411600	2185400	2426900	2132100	2186100	2127300	2373300	1702400	4881600	3483200	7466000	5411800	7249800	9488400	6686000	6401700
Glu-Lys	31173	47122	23644	40900	70586	30852	76608	79900	446330	398840	436800	327170	62385	79459	57387	64251
Gly Leu Met	11201	9	9	9	9	9	9	9	3955700	3330600	3590400	3801500	9	28892	9	18982
Gly Pro Glu	8882.6	10016	7160.3	15616	8441	13060	23138	15210	4261400	4156700	5591700	4997500	8133.1	19700	7074	20056
Gly Val Lys	9	9	9	9	9	9	9	9	163300	88998	115570	161360	63549	43361	43238	48080
Gly-Arg	9	9	9	9	9	9	9	9	535780	439520	590970	446750	9	9	9	9
Hexylglutathione	961180	874140	953330	930460	485840	644600	341880	667000	9	9	9	9	20314	48304	42308	35029
His Gln	9	9	9	9	9	9	9	9	2560000	2330600	2530700	1883200	1035900	1213700	1090500	871270
His His Lys	9	9	9	9	9	9	9	9	4129500	4282600	4511400	4276300	9	9	9	20326
His Phe Arg	7786700	6742200	7884100	7079400	4982300	6403000	3839400	5700600	108660	81032	76390	73876	2750300	4103700	3660600	3264600
His Thr Lys	9	9	9	9	9	9	9	9	568530	443350	701860	608160	138060	193950	201290	151100
His Tyr Arg	412160	421500	477740	389800	584870	416930	539160	505630	18599	16787	14523	19253	678700	864820	732740	340940
His Val Arg	1478700	1861600	1699900	2361900	3483800	1843300	3360700	2962500	9	9	9	9	154000	243350	271650	170430
His-Cys	8420200	7577600	5716300	10007000	8960900	8960300	7029600	10162000	378350	965210	381150	936140	2688600	7021200	1691700	4973900
His-Phe	4161700	3854500	3744300	4656300	3971100	3273600	4337700	5221100	182640	166270	264550	217540	2728600	2790800	3430700	1699700
Hydroxyprolyl-Isoleucine	9	9	9	9	9	9	9	9	2091900	2293000	2479000	2409500	9	9	9	9
Hydroxyprolyl-Threonine	120340	109800	127830	114550	141020	110640	138450	162290	15073	15280	13153	17876	84242	116030	105700	96685
Ile Ala	66186	49017	57308	79712	67307	76383	65648	37671	2539100	1947200	2319000	2113600	1966100	2025600	2123100	1602100
Ile His	28919000	31569000	29063000	25513000	33479000	28085000	34184000	37837000	1153300	1193100	1286700	1500800	26854000	41111000	35047000	29719000
Ile-Asn	368480	366790	361130	395790	335560	313440	355190	400650	16989	13303	9	9	318210	383410	322810	303790
Isoleucyl-Tyrosine	1218900	1347300	1089000	1484600	1759700	1131500	1642800	1926200	29609	25151	47203	34275	308000	405340	321260	180980
Kainic acid	15219	21868	14145	16156	9045.2	8205.2	7901.3	11370	3497.8	2341.3	2964	9	47823	71540	57188	47442
L-Agaridoxin	9	9	9	9	9	9	9	9	1920300	1592600	1415500	1787000	9	9	9	9
Leu Ala	2826600	2637400	2970400	2650300	2963900	2631600	2934600	2679900	233130	266140	307300	317260	3139300	3145400	3266300	2949600
Leu Asp Gly	122060	102320	151240	103710	142180	89174	130930	99880	146330	100930	113350	110760	868850	1387400	759830	879880
Leu Glu	5095100	5662900	5445400	5205000	5399300	5822300	6394000	8964000	764820	669560	666900	620430	101130	263970	134870	131560
Leu Phe	1950200	2192000	1659800	2296000	2448800	1944900	3027700	2894500	37978	47393	64932	50824	771920	905740	785200	637180
Leu Phe Asn	189560	174930	237100	188140	190040	261970	221040	222920	175100	202560	248330	185620	163340	124920	187060	233590
Leu Phe Asp	9	9	9	9	9	9	9	9	396650	260330	240830	229190	9	9	9	9
Leu Thr Asp	9	9	9	9	9	9	9	9	984860	876010	1012700	894720	1648200	1946400	1597200	940770
Levetiracetam	1035700	1412900	1441600	1350000	1611900	1405700	1720400	1817200	165070	196820	245260	146030	1685600	2183700	1913600	1443400
Lisinopril	447160	509670	488720	712270	618070	477320	661000	771480	15286	16295	18361	26490	214380	253820	232020	164760
Lys Pro Glu	9	9	58423	60485	119390	126260	132840	81346	1672000	1396700	1777000	1988100	51306	97398	57701	61406
Lys Trp Lys	28472000	32854000	24956000	32982000	40086000	27741000	47565000	48653000	1127700	994540	1200600	1135700	12901000	7913100	12294000	5929400
Lys-Asp	9	9	9	9	9	9	9	9	531010	484030	666600	478020	9	9	9	9
Lys-Cys	83435	50156	59319	70078	60647	121830	126410	141850	4150800	2567700	4041300	3406000	129500	128490	139840	110580
Lys-Gly-OH	9	9	9	9	9	9	9	9	307550	292030	224840	322690	9	9	9	9
Lys-Pro	12281000	11301000	17537000	13004000	11736000	10067000	12354000	12631000	1377500	1190200	1773400	1345500	17719000	20951000	21421000	16487000
N-(4-Aminobenzoyl)-β-alanine	9	9	9	9	9	9	9	9	132390	162580	162270	128290	845680	503590	647140	442730
N1-Acetylspermidine	603210	765620	569480	681240	309640	414410	291340	322500	18767000	21841000	22758000	17417000	11121000	20550000	14893000	18976000
N5-(1-Iminoethyl)-L-ornithine	9	9	9	9	9	9	9	9	558920	422960	675330	512190	116100	109610	146960	122220
N5-Acetyl-N2-gamma-L-glutamyl-L-ornithine	9	9	9	9	9	9	9	9	288930	206800	261130	228030	9	9	9	9
N-Acetylglucosaminylasparagine	90742	80726	84854	114370	86724	82877	95527	111050	825940	740950	700060	685590	2529800	2767400	2440200	2175400
Nateglinide	1044600	833150	1039000	1197100	973530	786930	963580	1036200	11266	4598.8	8567.4	6369.8	121800	186600	201660	103390
N-lactoyl-Tryptophan	3486600	3577300	3351400	3634500	3680600	2884600	3768900	4100200	150470	148280	162790	167120	2759600	3754900	3195800	2427800
N-Palmitoyl-L-serine phosphoric acid	4907800	4036900	3993000	5588200	13341000	11821000	14940000	16910000	944340	662730	658540	920730	312020	395640	304190	236460
N-Succinyl-L-glutamic 5-semialdehyde	9	9	9	9	9	9	9	9	1364100	919320	1041900	1073300	4944800	6716600	6030700	5155600
N-Tigloylglycine	7086700	7745700	7012300	8593000	6773900	8814000	8132200	8387000	7648500	7924300	7961300	5930600	7209500	7990900	8313000	6651800
Ophthalmic acid	67057	55144	150360	86655	79667	50350	85204	93244	18741000	17602000	14398000	17261000	102440	94365	87606	80424
Pentyl acetate	8124.8	6624.1	7570.6	5747.3	21850	9703.9	65681	22961	8388.1	9386.7	6653.3	11353	51845	62596	65406	45579
Phe Ile Lys	892790	833060	1017500	879180	521420	593980	396220	662100	9	9	9	9	45176	122150	85932	107170
Phe Leu Lys	19139	32262	33832	21354	48678	33316	68090	49265	1079200	757880	1111800	839620	9965.4	9	16877	11491
Phe Lys	14821000	15418000	11278000	11881000	17160000	12484000	17601000	17528000	334610	365530	388970	512220	9196100	10120000	9586800	8193600
Phe Pro Ala	618930	544930	534290	644110	573160	542880	622120	564170	9	9	9	9	207580	247790	253190	210630
Phe Pro Glu	10675000	10702000	11338000	10033000	5509500	7308100	3978800	6512000	40334	21381	21752	30918	313040	635100	730160	514170
Phe-Gln	16991000	23825000	20627000	22825000	23567000	20899000	25506000	25271000	453050	518990	591410	500390	23052000	27640000	26137000	21070000
Phe-Gly	7024700	11312000	9030800	10408000	12756000	10189000	16604000	22342000	91285	70977	110620	80705	337840	319490	281280	326500
Phenyl dihydrogen phosphate	30025	28470	30773	31483	25065	33878	35259	36359	39742	39583	41778	36251	30275	23978	32208	26885
Phenylalanyl-Arginine	78323	79430	36125	114770	93645	32833	108200	55764	9	9	9	9	98858	94569	99576	61241
Phe-Thr	7240300	7639500	6531800	8220200	8499100	6570900	8614200	9584100	186910	135300	216110	204190	5774400	7004100	6873500	4993300
Phe-Tyr	1502100	1415200	1362900	1928200	1642500	1247200	1727400	1833200	21163	17535	24316	14703	351510	531150	495490	361260
Phosphonic acid, P-[(3R)-3-amino-4-[(3-hexylphenyl)amino]-4-oxobutyl]-	206680	260810	240530	203510	271880	150560	271340	299970	7813.9	5715.4	5246.6	12698	82518	49765	75849	39991
Pirimiphos-ethyl	343090	322010	381030	439130	513090	484590	451270	504020	9	9	9	9	294920	349940	320970	263590
Pro His Arg	890110	884760	1053200	926480	599950	880190	586390	763280	305500	321820	319300	393460	21241000	42565000	44609000	38999000
Pro Ile	2762200	3203300	3877500	4376000	4105400	3061700	3857900	4253600	309360	260390	399790	372020	6303700	8702800	7258500	6199600
Pro Phe	29840000	35329000	36559000	39569000	31788000	23812000	32972000	34958000	855030	759750	801670	968100	27278000	32711000	31009000	20477000
Pro Phe Leu	13121000	14752000	12303000	13341000	15637000	10928000	16336000	13992000	380910	283270	417610	467940	3746700	6380600	4919600	3054000
Pro Ser	9143700	12051000	11368000	10213000	13006000	8912500	11940000	13729000	1085000	1073300	1203900	1225700	13995000	16773000	14995000	11269000
Pro Tyr	720670	684200	733300	684090	659880	509260	772670	492800	36256000	16917000	26331000	19623000	6843200	13969000	8211000	5140600
Pro-Asn	10056000	7795400	9865000	9684200	10964000	9519300	10176000	10406000	1067400	1101100	1069600	1237900	13306000	17683000	14625000	12431000
Pro-Gln	17415	9	9	9	9	9	9	9	1819500	1380500	1246900	1627100	9	9	9	9
Prolylalanine	59159	40413	70886	53544	54227	51772	54308	80589	1381700	1290300	1648600	1537100	89385	119160	93686	81300
Prolyl-Tyrosine	9	9	9	9	9	9	9	9	356760	291610	252590	235970	4373300	4058300	4558700	4580000
Pro-Met	3979900	3754400	3282200	2995100	3418400	3138600	3627900	2763600	320010	305380	364230	328270	6117100	6471200	6449800	6084000
Propyl propane thiosulfonate	11887	9004.9	13958	10554	13877	15609	13462	10455	7817.6	12236	9699.3	11206	10725	11160	12221	12612
Pro-Thr	1041400	1091700	1243400	1188200	1381400	922240	1367300	1401700	279420	220700	354160	300790	1939300	3115700	2485500	2060000
Pyridinoline	9	9	9	9	9	9	9	9	50142	49208	47748	54405	9	9	9	9
Ser Phe Arg	214970	265450	260730	275490	320740	263760	306970	371860	1584700	1774600	2174100	1672400	691890	873480	696790	331880
Ser Val	103090	96784	123790	82738	131470	89734	128610	102800	9167300	7264600	11138000	8695800	12215000	15561000	13669000	11428000
Ser-Cys	403310	356590	417100	298610	310070	350710	428400	621160	285300	261040	265830	417710	400990	697780	526000	540490
Syndesine	9	27101	24198	15716	31607	20036	23638	37129	48626	44637	56482	44036	32574	44149	49087	30495
Thr Glu Lys	1384100	1431100	1102600	1411500	1610300	1291100	1815600	1961700	602250	564120	824250	750800	1197200	2119000	1552700	1266700
Thr Lys Glu	9	9	9	9	9	9	9	9	1770800	1522600	1905000	1763300	9	9	9	9
Threoninyl-Threonine	2433200	2536800	2784900	2313700	2474800	2218400	2379300	2077300	4869200	4001100	9026900	5342500	6474000	10512000	7031600	6924800
Trp Asn	1173000	1315000	910680	1603400	2377900	819420	3866500	2329900	66053	56657	67595	95110	1151900	1137400	1651100	1111700
Trp-Cys	1200600	1009200	1010600	1318700	834590	610990	1101200	880850	10998	13796	13792	13441	331250	374250	387620	298310
Trp-Gln	9	9	9	9	9	9	9	9	42833	33654	25829	28934	500320	535890	571650	516180
Tumonoic Acid A	9	9	9	9	33867	22731	21265	24797	70048	68537	66648	56627	146090	210150	208900	135220
Tyr Ala Lys	1785400	2119800	2202500	2204600	1943500	1880300	2113500	1921000	1814900	1787600	1688800	1901500	47588000	62957000	66140000	46957000
Tyr Met Arg	2715400	2903900	2730500	3089000	3071900	2465400	2701900	3215300	114850	66597	93994	85590	1763200	2203500	2226100	1731400
Tyr Pro Phe	2105700	2324000	1923900	2297300	2062800	1638500	2485000	2695000	110640	94377	152210	118660	2317100	2476400	2504500	1871700
Tyr Ser Val	9	9	9	9	9	9	9	6300.2	466580	417060	614420	602420	9	9	9	9
Tyr Thr Lys	29756000	40942000	29158000	40857000	62491000	49502000	83470000	71089000	80792	9	9	9	497690	388930	1042800	446790
Tyr Val Gln	4993800	5854400	5525100	6573400	6341000	4855900	6142500	6120000	1524800	1307600	1399700	1653400	7876200	11700000	10083000	6921100
Tyr Val Lys	184570	236610	175830	252760	342790	245750	407600	339660	7091.1	12254	14905	11811	122610	99080	134260	47641
Tyrosyl-Isoleucine	3012800	2819800	2687900	3708200	3112500	2649300	3171100	3069600	67008	53590	83286	80534	1128600	1326000	1427800	1169200
Tyrosyl-Proline	7461600	8607700	8265700	7831300	6100300	6809000	8310800	6915800	180350	230910	296850	272180	7907600	9779900	9600200	6946600
Tyrosyl-Serine	9438800	9860900	7067800	6750800	2260800	2530400	2730700	2971600	9373200	5099600	6933400	6789100	13043000	19840000	13093000	10541000
Tyr-Pro	322440	325510	322110	361920	305820	289500	299330	365860	9	9	9	9	59247	104650	104170	73474
Tyr-Ser	9	9	9	9	9	9	9	9	611180	498440	464640	561930	9	9	9	9
Tyr-Val	5792100	6603300	4660900	6456200	7946100	5906700	9586600	8215100	121220	58218	65543	125480	171100	171300	351960	119820
Val Lys	3300200	3258700	3045200	3801800	2874100	3928500	3836900	3835400	196750	161760	183970	120070	4928900	6852100	10001000	6206300
Val Phe Lys	73756000	67425000	83371000	70892000	30339000	48828000	24157000	39087000	198410	117430	185000	172240	7537700	7713700	9623300	7502300
Val Pro Arg	1753300	1621700	1210100	1747300	864820	1385700	1579200	1108600	160950	116240	241500	258550	20313000	28603000	26030000	16622000
Val Pro Leu	144700000	136010000	150960000	140540000	91710000	97199000	71519000	108740000	379830	409090	342010	288610	1509700	3603400	12269000	3586300
Val Tyr Asp	125060	164570	133380	147690	156710	87573	158490	150300	133150	159380	162780	159850	6562300	9528500	8443700	5830200
Valganciclovir	9	9	9	9	9	9	9	9	415190	338520	362000	369380	27006	44163	33468	23837
Valyl-Serine	3288700	3537500	3133200	3063700	3378600	2626800	4251000	4479000	32928	9	41823	52640	162660	463750	404660	335640
Zanamivir	6297500	6739800	7313400	6730900	6693300	6827500	6728700	6776300	2544100	2235600	2330900	1915800	1147100	1633100	994350	2747800
3-(Dimethylamino)propionic acid	1541500	822430	1324400	1972700	2167200	2007900	3186200	1745700	117010	136400	98181	80993	18793000	14806000	32219000	22651000
Dehydrophytosphingosine	673000	678740	671780	806060	751550	632660	643700	544340	692060	697610	746070	720210	642980	699850	661610	659550
Dicyclohexylamine	3368700	3912700	3242200	3681400	3558900	3348700	3790000	3099400	3482400	3198500	3458700	3843300	3576300	3128900	3764800	3354200
Eicosapentaenoyl ethanolamide	39664	33255	28758	34430	39419	37235	37058	38611	31048	30359	26067	50871	41039	44882	34579	25928
Memantine	435760	458970	492290	434360	436870	452940	474920	425350	546700	579180	505440	487440	579130	482080	614430	483320
N,N-Dimethylaniline	4177000	1878600	4540700	3810800	667310	631410	2347900	701450	175510	313140	293340	266690	373550	430190	340520	358320
Tribenuron-methyl	129750	144250	128860	157310	130900	131400	135160	151840	6929.8	6377.9	7924.9	11166	79949	94234	107410	73248
1-Deoxy-D-xylulose 5-phosphate	254080	140560	230850	145880	545940	548340	453550	599880	407570	565080	530520	640820	1437800	1411800	1167400	748060
1-Methylcyclohexanol	40547000	27636000	45175000	31486000	3813800	5457800	62125000	4628400	4253300	4097300	5235200	4386000	4550500	4734300	4069600	5002600
1-Palmitoylglycerone 3-phosphate	12832000	11255000	9979900	14242000	29370000	23872000	31226000	34165000	7028900	4755500	5143500	7847400	963280	1293600	978290	834580
2-[4-(3-Hydroxypropyl)-2-methoxyphenoxy]-1,3-propanediol 1-glucoside	44826	45845	45685	41920	44245	54013	46566	42616	4624	4544.2	4786.4	4777.8	49763	55959	52671	50001
4-(Methylnitrosamino)-1-(3-pyridyl)-1-butanone	4890.6	5195.2	8124.1	5935.3	21043	9627	65186	18620	7686.2	8024.2	5166.2	9769.5	51403	77976	65453	49266
4-Oxo-4-(3-pyridyl)butanal	71442	79227	96733	83962	83738	88226	79209	85669	64482	71845	68453	69545	59240	53903	63740	70723
6-[5-(2-{[3-(3,4-dimethoxyphenyl)-1-hydroxyprop-2-en-1-ylidene]amino}ethyl)-2-methoxyphenoxy]-3,4,5-trihydroxyoxane-2-carboxylic acid	180910	166760	154500	206410	160170	134050	142630	189220	9	9	9	9	16587	22989	15086	15010
Bebeerine	16991	22924	15809	42371	26550	12683	37309	32966	9	9	9	9	110530	155770	155620	96100
beta-D-Fructofuranose	9	6341.4	4988.3	5439.5	6851.7	5507.2	6872	8620.2	48693	32867	23568	67175	2734.7	9	4086.6	9
Cellulose, microcrystalline	9	9	9	9	9	9	9	9	2316800	802970	1491900	1780800	9	9	9	9
Cymorcin diglucoside	720880	1372400	716190	1289300	3220900	1118900	3944700	2929700	51385	41119	65880	87966	191700	313800	250340	277940
D-Glucono-1,5-lactone 6-phosphate	2217300	2349800	1904200	2096000	1561300	1642900	1521400	1516000	9219000	9419200	7936900	8761100	2340700	2357600	2148600	2424100
Dronedarone	13209	6115.8	14290	9124.1	24877	46842	34274	25021	690680	467030	530050	454860	9	9	9	9
Erythritol	8027000	6726900	7953100	7517800	7959500	8222800	7979000	8943300	7286300	8189300	7749200	7755200	5390900	5229700	5213500	5289100
Ethanol	22199000	23202000	22167000	20831000	21200000	18687000	23071000	20325000	7151600	10079000	9649200	10122000	21735000	22134000	23774000	21660000
Ethoxyethoxyethanol	712580	818120	874510	674160	653280	721310	655080	519330	683580	705970	671770	635590	520080	544600	468400	542280
Heptaethylene glycol	1411200	1409700	1151900	1304100	1324300	1400100	1693300	1361800	873780	696810	904680	883730	870140	999010	1038300	780070
Hexaethylene glycol	1915800	1808600	1757000	1390900	1675000	1550800	1794600	1743100	1365900	1095500	1362400	1788000	1224000	1766800	1711400	1629600
Monohydroxyperhexiline	429980	457110	404160	542270	218660	225040	241700	281480	213850	162430	185080	233010	84244	94962	63283	45572
Muscone	9	9	9	9	9	9	9	9	15626	11289	13365	11272	5324.5	9	2886.4	2765.6
Oleana-1,9(11)-dien-28-oic acid, 2-cyano-3,12-dioxo-	9	9	9	9	9	9	9	9	19624	13435	16209	19836	9	9	9	9
Phenethyl rutinoside	111520	110220	110990	149170	136790	106650	127580	115360	9	9	9	9	41305	46417	53926	18976
Phenyl beta-D-galactopyranoside	9	9	9	9	9	9	9	9	62617	46465	43474	59905	61836	68911	73364	59349
Pisatoside	9	9	9	9	9	9	9	9	7763.1	5422.1	9	9	885830	1269300	677460	933710
Semilepidinoside A	9	9	9	9	9	9	9	9	1931.9	6222.6	7664.2	12582	245300	239790	293890	191110
Streptomycin	9	9	9	9	9	9	9	9	1011500	854880	1075400	1152400	9	9	9	9
trans-5-O-(4-Coumaroyl)-D-quinic acid	323060	316300	302060	322850	268450	258360	258270	334610	9	9	9	9	9	14926	19182	9
(3-amino-1H-1,2,4-triazol-5-yl)methanol	1261200	930970	772290	1005800	664460	906390	685710	704580	545810	582190	763860	950010	698650	548780	566710	666340
(3R,3aR,7aS)-3-Butylhexahydro-1(3H)-isobenzofuranone	71656	61968	72750	65056	71153	69430	73638	70043	66340	68967	65035	60664	65266	63876	69579	47983
[(1S,2R,5S,7S,8R,11S,14S)-11-Hydroxy-7-(2-hydroxypropan-2-yl)-1,2-dimethyl-6-oxa-23-azahexacyclo[12.10.0.02,11.05,10.016,24.017,22]tetracosa-9,16(24),17,19,21-pentaen-8-yl] acetate	205310	180660	202970	194930	235790	194750	343310	363280	9	9	29557	36533	9	9	9	9
1-(2,3-Dihydro-1H-pyrrolizin-5-yl)-1,4-pentanedione	3756900	3605400	3928600	3969200	3821700	4000200	3974800	4262400	4153600	4030600	3943800	4214400	4625900	5041000	4603900	4624900
1,2-Bis(2-pyridyl)ethylene	871750	761720	1087700	1433000	2453700	1991500	3412300	2470000	281850	315460	251290	411890	1034000	1769200	1436800	1112800
1-[3-(4-Decoxyphenoxy)-2-oxopropyl]-3-methoxycarbonylindole-5-carboxylic acid	199980	153490	148500	187950	137600	137430	162020	182080	9	9	9	9	7351.5	15524	8163	8295.7
1-Hydroxytacrine	9	9	9	9	9	9	9	9	5288000	4781100	5501000	5512800	9	9	9	9
1-Pyrrolidinecarboxaldehyde	9424600	8745000	9232100	9415800	9526200	10229000	10050000	9624700	9868200	10192000	9554000	9600100	9326300	10146000	8714100	9114500
3-[1-[3-(Dimethylamino)propyl]-5-methoxy-1H-indol-3-yl]-4-(1H-indol-3-yl)-1H-pyrrole-2,5-dione	1886200	1989600	1857100	2064600	2120800	1573800	2196300	2346300	51225	38951	40768	58384	849480	1095900	883800	767030
4-(3-Pyridin-2-YL-1H-pyrazol-4-YL)quinoline	9	9	9	9	9	9	9	9	181550	181870	121920	77042	9	9	9	9
4-(Methylnitrosamino)-1-(3-pyridyl)-1-butanol	382240	490620	451170	524020	211730	250550	974670	207850	235660	270520	201040	284610	200220	184840	219830	224900
4-Acetoxy-2-hexyltetrahydrofuran	9	9	9	9	9	9	9	9	18990	12782	9	9	108710	146460	80021	96664
5-(2'-Carboxyethyl)-4,6-Dihydroxypicolinate	66511	67583	74088	98328	70615	63566	77636	79093	9	9	9	9	58452	72016	55597	69286
5-Acetylamino-6-formylamino-3-methyluracil	9	9	9	9	39829	22849	45347	41282	30010	33543	19293	35602	17439	47443	19788	18396
5-Methyl-THF	8558300	9987600	8362400	8740900	10285000	6730900	12808000	10735000	2905500	2576600	2650700	2562000	3138000	4194100	6323900	2893100
6-Hydroxy-1H-indole-3-acetamide	3501500	3675800	3516100	3619300	4623100	4207400	5238900	5722000	931740	1054700	817280	1159000	34945000	54248000	38459000	34972000
Aceclidine	65762	90017	124130	64470	55908	46821	79672	81242	220870	155800	111720	36452	64558	91545	141520	126620
Acrimarine I	1302600	860350	770440	1261100	236070	174390	254840	303020	159700	117150	117740	164680	37961	43179	36835	29078
Aldehyde Reactive Probe	66894	55873	63590	72724	97918	118010	127740	125040	354290	282850	346460	394500	1274200	1960300	1525600	1344500
Alprazolam	3014100	2486400	2709400	3632300	4744400	3442700	4732600	5318700	85834	65240	56489	61131	124270	156670	146830	99437
Arachidonoylserotonin	1227900	1229200	1272200	1227600	1252300	1372200	1391100	1322900	1360700	1412300	1489400	1444000	1522500	1575300	1475800	1388300
Brassica napus non-fluorescent chlorophyll catabolite 3	36218	39395	35139	42655	36841	29432	50116	41642	9	9	9	3566.5	22620	34281	24256	14566
Butopyronoxyl	365970	338040	341910	351340	278490	291250	313990	325190	83386	95786	113790	99439	123270	128590	110600	116890
Calcimycin	9	9	9	9	9	9	9	9	46090	27874	29078	34421	9	9	9	9
Cetylpyridinium	15150000	95081000	31507000	52486000	302050000	297550000	289550000	326160000	1487600	1092400	688460	802960	41312000	1186000	1399700	2180300
desmethylastemizole	9	9	9	9	9	9	9	9	88460	57420	61745	71325	9	9	9	9
desmethylclomipramine	572160	488120	588250	565940	482710	442650	398750	433920	513580	403330	610110	572500	416750	541350	649840	526470
Diacetylfusarochromanone	9	9	9	9	9	9	9	9	68150	53892	44196	57502	72658	53786	52193	70940
Dihydropteroate	9	9	9	9	9	9	9	9	4096.1	3782.3	5913.8	16556	213150	202880	318490	196430
DL-α-Lipoic acid	6471300	7167100	7421600	7330000	7179900	7923200	7814900	7355500	6619600	6190600	6795300	6293500	5380000	5098200	6044300	4977300
Dodemorph	195020	372690	198390	1051400	2528400	2329100	2550600	2225100	22903	26191	31168	21952	35157	26336	32950	27944
Donepezil	333100	391200	377300	342510	326000	265350	256860	271250	441440	437730	414800	386790	406320	394050	402230	410420
Ellipticine	413610	271420	433960	425960	1936400	981670	2800800	1783700	41969	37599	28727	22946	21583	26202	26207	20024
Famprofazone	1250000	1064800	1044900	1511700	2692100	2490400	3151100	3399900	9	9	9	9	14474	27840	21061	13703
Flindersine	1026500	997600	1043100	1058300	1063600	1098200	1104700	1167900	1122800	1178900	1045900	1207900	1247700	1309500	1275300	1216900
Fluphenazine	201310	200190	203240	180280	194820	171610	218390	213820	11531	6780.5	5301.8	8762.5	65594	35573	60536	21363
Indoramin	94916	94916	97442	93923	105670	80762	96499	99158	9	9	9	9	483240	634760	704150	403330
Iproniazide	2149100	2458800	2600900	2512600	1995200	2446100	2279100	1851700	2238100	2235900	2223800	2041900	1833900	1687300	1597200	1769000
Isolinderanolide	3600700	992520	909860	4585300	4536700	3902000	2366900	3692700	129840	49028	16650	32209	539550	1148100	476220	309970
Linagliptin	2049900	2308800	1650100	2600300	3132000	1745800	3785700	3219000	47142	48860	71242	50440	570370	258700	509210	169350
Macluraxanthone	957590	414970	301280	1037000	1596100	1663200	1186300	1486000	20793	11936	4334.4	7725.9	88921	204810	103450	70394
Mangiferin	9	9	9	9	9	9	9	9	941890	1051100	1292900	1013900	476460	642910	665530	398280
Marbofloxacin	76369	80432	68172	87515	91742	51400	95182	115070	23048	17037	20602	22785	552230	880270	731180	433060
Mepiprazole	9	9	9	9	9	9	9	9	899350	791150	823100	957240	9	9	9	9
Mirtazapine	438220	445730	455430	465890	434540	498830	507710	515470	503090	537630	426390	529860	584320	579240	568250	564000
Molinate	3996200	4059200	4210600	3979500	4157200	3929900	4167600	4174800	4103600	4542700	4529200	4314000	4522500	4779200	5259700	4321900
N-(3-acetamidopropyl)pyrrolidin-2-one	295720	309960	317500	319160	359380	294450	335930	373830	23876	20459	19789	25350	274440	374370	283170	263210
Nialamide	753670	586220	631030	1125100	523860	544910	690150	439450	261430	318090	366310	264450	455890	471330	470400	284700
Nitroxoline	1539000	1918800	1836900	1774700	2059100	2228000	1626300	2199000	2014900	2090800	1904400	1880100	1637800	1653400	1714700	1662600
Nizatidine	814910	737580	701840	853860	890720	626350	771800	799080	25070	22324	34922	28910	186070	206130	213920	137920
N-Oxyclozapine	609630	525050	509570	836300	856410	418810	1330000	735580	633410	1064300	791890	604090	3289000	2012000	2469000	1986000
Paliperidone	173320	133720	130870	114760	130090	160680	180880	158920	360430	287910	338260	347810	4993300	5422100	6045000	4147600
Pefloxacin N-oxide	931410	692970	782090	944280	892120	803540	949390	1091800	7915.5	5485.4	6799	8016.9	84440	103700	86871	71644
Pheniramine	9	9	9	9	9	9	9	9	242020	166510	254170	255350	9	9	9	9
Probenazole	490010	549410	519640	571020	572600	558430	584800	593280	460540	419670	452590	457600	471240	517340	556730	483160
Pyrazine-2-carboxylic acid	5854200	6510800	6399100	6802000	6601600	7080600	7827300	6982200	9011500	8399400	9340300	8230400	5829700	4171000	5702200	5306400
Quinomethionate	253360	249880	274030	285410	241190	280810	273800	266150	271210	269560	249950	232920	195000	185300	183130	174490
Rhynchophylline	1231200	1501400	1276300	1414200	1002200	1136700	1094700	1125800	971730	1403900	1330900	1256000	1261000	1178400	1299200	1457700
Riboflavin reduced	2597800	2818600	1885600	2709900	693760	799290	941270	1047700	2183300	1223200	1505000	1640400	2666700	3745100	2728500	2657600
Riesling acetal	1356200	1394500	1502000	1405400	1422700	1334500	1367300	1431000	1748500	1773400	1519700	1505200	1664400	1568000	1573300	1671300
Rutaecarpine	1865600	1776500	2001900	1926900	1911600	1966900	1972900	2073500	2056000	2145500	1871800	2123800	2254300	2282500	2282800	2168100
Sancuso	344800	339250	287310	442260	268950	337090	433590	377500	20056	12244	18951	16695	49293	60505	53835	58284
Tanakamine	331440	315780	342150	340450	313120	401170	333870	349410	341920	335020	326950	317910	314310	280480	243410	281210
Tetrahydro-L-biopterin	9	9	9	9	9	9	9	9	3096200	2862600	2968800	2927700	49702000	48464000	45381000	32997000
Ticagrelor	315950	342900	281090	328640	296000	276150	399950	333770	17470	13670	26428	16166	343900	503220	368930	383830
trans-Epoxysuccinyl-L-leucylamido(4-guanidino)butane	594220	527190	545850	494980	587060	528540	535830	590360	4535600	3407000	4481300	3422100	22653000	28237000	23761000	18295000
β-Hydroxyethyltheophylline	579340	606590	743240	622310	596600	725910	758560	593340	661510	637910	724680	579190	653110	610340	752400	687220
β-Lapachone	1110700	1324800	1389500	1031000	692440	438760	2739800	703450	526160	530400	363600	337490	12949000	19139000	18804000	12739000
4-Hydroxyphenyl thiocyanate	364580	317600	330460	339110	342400	360650	351530	373750	387510	405230	368920	362140	385160	406770	392050	398200
(+)-(1R,2R)-1,2-Diphenylethane-1,2-diol	9	9	9	9	9	9	9	9	40473	30421	39387	36866	9	9	9	9
1,7-Bis(4-hydroxyphenyl)-5-methoxyheptan-3-one	135420	187400	154740	143510	169900	223870	197760	177690	9790	16189	20238	19078	69880	85714	99030	81624
2',6'-Dihydroxy 4,4'-dimethoxydihydrochalcone	1225100	936940	1011700	1155200	1021100	1073800	1187000	1283700	293100	337070	271420	269790	289510	338620	303370	314100
2-{6-[2,4-dihydroxy-3-(3-methylbut-2-en-1-yl)benzoyl]-5-(2,4-dihydroxyphenyl)-3-methylcyclohex-2-en-1-yl}-5-[(E)-2-(2,4-dihydroxy-5-methoxyphenyl)ethenyl]benzene-1,3-diol	9	9	9	9	9	9	9	9	255420	144240	162810	180520	9	9	9	9
2-Hydroxyibuprofen	109840	95521	111670	96542	97438	102660	93205	90038	109660	113820	110930	104420	97792	112220	102720	97259
3-(3,4-Dimethoxy-5-phenylmethoxyphenyl)-5-hydroxy-6-methoxy-7-phenylmethoxy-1-benzopyran-4-one	2364200	1118900	2728700	2894000	349600	322390	1152900	326340	9	9	9	9	225540	249660	227160	222810
4',5-Dihydroxy-3',6,7-trimethoxyflavone	79560000	47141000	81723000	103810000	5666900	8605400	127490000	10278000	3317100	4134700	4086400	3740000	4153400	3777700	3664400	3561300
4-Hydroxytamoxifen	9	9	9	9	9	9	9	9	109800	129450	34865	33544	9	9	9	9
5,7-dihydroxy-2-(3,4,5-trihydroxyphenyl)-3,4-dihydro-2H-1-benzopyran-4-one	662700	689680	750390	660750	671190	819180	719870	652420	1181700	1350100	1115900	1067700	758140	743850	669850	807760
6',7'-Dihydroxybergamottin	826860	752760	657960	918610	1392600	1302300	1487000	1423700	9	9	9	9	11798	21657	14176	10863
Aflatoxin M1	321970	336250	318170	315390	302110	324590	339410	316060	297350	315020	295760	291900	292840	311720	258780	320960
alpha-Cyano-(3,4-dihydroxy)cinnamide	9	9	9	9	9	9	9	9	2240200	1639500	1120500	1091700	26176	56845	19114	32591
Apigenin 6,8-di-glucopyranoside	163850	179270	152390	175210	176400	167970	188520	185790	13563	12945	13172	13558	34854	51227	60994	39401
Carbidopa	425830	448330	421280	486700	449530	417710	471960	477130	120340	110100	122660	117480	558840	649070	555280	554910
Carboxyibuprofen	447420	229300	431830	533730	152210	201270	214530	229740	473040	382910	396760	397100	49520000	62946000	62364000	47581000
Clausarinol	15317000	6859000	11336000	13006000	1261900	2178100	3122600	1414000	5144200	6089500	5265400	5923900	4651200	8890400	4808000	5675000
Cochliophilin A	638060	476360	632490	665840	1083700	818560	1167900	1241300	9	9	9	9	84793	123750	117920	73625
Ferocaulidin	4609700	4127900	4384400	5636800	3080300	4176200	3819500	3917900	2189400	1488800	1577300	1958900	1545300	2849800	1442500	1394700
Herbacetin	9	9	9	9	9	9	9	9	158880	239550	252870	414320	130460	137410	144350	112470
Ivermectin B1a	1043700	706070	652570	1065600	818730	891180	1264500	1300400	12334	15306	12538	12777	16836	19070	13891	20430
Licochalcone A	27701	27687	32405	24502	18023	21966	15053	12043	22176	17219	20075	23415	11549	24525	25561	21347
Minocycline	205800	200360	192690	216380	261640	189690	275270	282940	8321.8	7742.7	6980.1	8323.7	219790	285640	226930	185720
Osthole	1116400	904490	1200400	1289700	5355900	2642800	7665800	4796100	94826	95605	97733	71367	66480	71138	66432	53627
Salvianolic acid A	154030	155640	168310	172850	156160	183850	176980	174600	146930	163020	146840	114890	84452	80007	66561	78050
Schizandrin	9159600	5292900	11657000	13440000	1844900	2826700	5772800	2836900	1822700	2180100	2109200	1657600	2282800	2414400	2290000	1502200
Tigecycline	1674400	1663600	1508300	1759700	1672700	1498000	1768000	1672000	44615	41072	46836	72764	628520	479930	597140	358590
Wuweizisu C	9	9	9	9	9	9	9	9	82664	55991	66863	53304	52289	65584	65842	24033
(10S)-Juvenile hormone III acid diol	9	9	9	9	9	11934	9	9	38914	24937	35026	29719	41708	56573	47893	30933
(11S,13S)-3-Amino-5,12,13,14-tetrahydroxy-14-(hydroxymethyl)-8,10-dioxa-2-aza-4-azoniatetracyclo[7.3.1.17,11.01,6]tetradec-3-en-9-olate	6701.9	8733.9	4884.4	7275.3	6447	8362.3	8546.7	8005.2	99428	107360	95418	85343	303060	341640	303830	559280
(1R,6R)-6-Hydroxy-2-succinylcyclohexa-2,4-diene-1-carboxylate;(1R,6R)-2-Succinyl-6-hydroxy-2,4-cyclohexadiene-1-carboxylate;SHCHC	98870	97958	108770	97314	92712	117900	104980	99311	77252	91147	81580	79136	54661	41436	49485	59631
(5-Formylfuran-3-yl)methyl phosphate;2-Furaldehyde phosphate;4-HFC-P;4-(Hydroxymethyl)-2-furancarboxaldehyde phosphate	1017100	1290100	960390	1222900	1188200	969710	1302300	1265500	308250	241520	288800	268890	2789200	3985200	3750700	3170400
(E)-4-Hydroxyphenylacetaldehyde oxime;(E)-[4-Hydroxyphenylacetaldehyde oxime]	9	9	9	9	9	9	9	9	330250	455470	434760	343810	2163200	1380500	1591200	1540800
[3-Hexadecanoyloxy-2-(9-oxononanoyloxy)propyl] 2-(trimethylazaniumyl)ethyl phosphate	30372	23893	34380	42088	13939	24487	44544	22546	12986	23167	17003	12126	30664	21892	11480	9627.1
10-Deacetyl-2-debenzoylbaccatin III	154870	214100	175920	184980	74333	88882	129540	88724	135550	207500	204160	175790	43517	43351	35327	39467
10-Propoxydecanoic acid	21152	25434	21116	24258	23115	23801	50521	27007	87172	75199	64845	77845	119660	169070	159270	95668
12-Ethyl-8-isobutylbacteriochlorophyllide d	9	9	9	9	9	9	9	9	458870	284770	313840	297610	9	9	9	9
12-trans-Hydroxy juvenile hormone III	8676100	7305800	9416600	9140100	13742000	14754000	14831000	17466000	924100	1021900	1039900	1069100	950200	1022400	829040	841240
13-Azaprostanoic acid	12736	17424	14905	12988	9	9	9	9	8582.8	3651.9	9	7535.6	967930	1544600	1450400	1262400
13-Desoxyterpendole I	2633500	1935300	1673600	3014500	2279700	2250600	2502600	4438500	13539	10186	11519	9939	8613.2	23052	9973.5	14692
14,15-EE-5(Z)-E	61432	38379	61163	89773	160060	103330	167860	167690	1837.4	1965.3	2026	2613.9	12931	20592	17590	11653
14alpha-Hydroxy-5beta-cholest-7-ene-3,6-dione;Diketol	9	9	9	9	9	9	9	9	76792	60964	80948	72815	56770	79849	65933	48781
15-Demethoxy-epsilon-rhodomycin	20904	15314	16758	28830	448430	454130	405130	548770	14647	25602	21289	30300	81590	74216	62015	52263
15-Oxo-beta-bilirubin	9	9	9	9	9	9	9	9	508830	383080	379750	402600	9	9	9	9
16-Oxo-palmitate	224950	186640	222490	233520	376880	400220	495380	501350	42405	31118	32891	32228	23987	50213	26456	23349
17,20Hydroxyprogesterone sulfate	17548	18438	16443	21728	17681	15393	20617	16513	18204	14372	14200	21914	942570	1077600	1021100	830400
17-Hydroxylupanine	257150	261680	285480	294880	164600	243690	216840	269550	17903	12769	7988.2	12769	15435	18820	12693	12603
17-phenyl trinor Prostaglandin F2 cyclopropyl amide	9	9	9	9	9	9	9	9	1199700	920060	1028800	910590	9	9	9	9
17-trifluoromethylphenyl-13,14-dihydro trinor PGF2	32097	17079	17400	10761	17584	15732	22740	16596	13648	16785	14207	12936	16058	21445	22175	15673
18-Oxooleate	140580	116750	140420	139880	192770	205850	195200	250050	11786	13066	11503	10643	10928	9605.7	8986.4	11092
1-Oleoyl Lysophosphatidic Acid(sodium salt)	3555100	2314600	2805900	3221600	7230000	7995200	10233000	10122000	1623900	541970	284990	143520	443030	471130	383140	369810
1-Stearoyl-2-Docosahexaenoyl-sn-Glycero-3-[Phospho-rac-(1-glycerol)]	159250	129250	159560	129500	142340	162300	153310	157130	137650	178270	164790	156680	152380	233480	194780	177610
2,3,4,5-Tetrahydrodipicolinate;delta1-Piperidine-2,6-dicarboxylate;L-2,3,4,5-Tetrahydrodipicolinate;(S)-2,3,4,5-Tetrahydropyridine-2,6-dicarboxylate	14992000	17986000	16967000	20744000	13903000	21183000	21179000	20852000	18132000	17817000	17722000	14160000	17951000	18401000	18948000	16702000
2',4,4',6'-Tetrahydroxychalcone 4'-O-glucoside;THC 4'-glucoside;Chalconaringenin 4'-glucoside;2',4,4',6'-Tetrahydroxychalcone 4'-O-beta-D-glucoside	231790	250420	218270	237840	120860	128400	127290	144890	681190	638610	496680	469900	1749000	1775400	1637400	1735400
2,5-Dideoxy-2,5-imino-D-mannitol	41568	38297	32303	40502	16571	19378	18036	12627	1973100	2019800	1756800	1802300	67906	38775	99693	140690
2-Amino-5-oxohexanoate	16818000	13727000	14837000	12114000	9047900	9937000	9727200	7378200	12040000	16773000	14362000	15115000	10290000	8045500	9048600	7876600
2-Aminoacridone;AMAC	157810	155500	174170	169340	158060	157130	152530	160160	173260	166500	160400	156550	140090	136980	160150	164780
2-Hydroxy-6-oxoocta-2,4,7-trienoate	74096	69649	62067	60213	58274	80145	118610	101770	6820.3	5811.4	4859.8	3466.2	3799.6	5670.1	3773.9	4359
3,5-Dichloro-4-hydroxyphenylpyruvate	154250	170140	172550	168730	180280	192070	175100	192260	155780	160460	155650	119190	100140	107320	84275	93074
3alpha,7alpha-Dihydroxy-12-oxo-5beta-cholanate	9	9	9	9	9	9	9	9	59818	42118	56939	55265	32323	49556	45999	34118
3beta-Cyclopentyl-5alpha-androstan-17beta-ol	950050	1067500	1081600	1154400	1188200	1119600	1171600	1187100	1060700	1107600	1130100	1071700	1178800	1403600	1314600	1162500
3-Geranylgeranylindole;3-(Geranylgeranyl)indole	9	9	9	9	9	9	9	9	200630	138250	177500	160310	119050	124600	159040	78932
3-hydroxyandrost-5-en-17-one sulfate	6423200	4899700	5521200	5472900	783940	845850	951490	1109000	7412.2	8617	13931	19752	18579	40320	12212	57343
4,4'-Diapolycopenedial	751300	669860	758500	800080	771170	730300	753650	713880	732510	853910	715630	797200	856910	720360	764860	687850
4,5-seco-Dopa	289700	244860	236730	302810	124410	128140	142290	174650	9848	9315.1	8792.7	7955.3	88006	136130	134980	93862
4-[(1-Oxo-7-phenylheptyl)amino]-(4R)-octanoic acid	2630200	1664700	2453800	3848700	9046500	5367600	8734300	9373300	53514	28216	30751	29744	934790	1338800	1197900	702740
4-Epiminocycline	6057800	6592300	5451500	6747300	7719700	5479900	8056200	8351200	157100	128610	167400	167440	731400	1045500	1635900	1017400
4-Methylburimamide	9	9	9	9	9	9	9	9	53957	48618	53178	55281	9	9	9	9
4-O-beta-D-Mannopyranosyl-D-glucopyranose	9	9	9	9	9	9	9	9	169170	150000	191470	206400	31140	40661	32441	26617
5 -CHOLANIC ACID-3 , 12 -DIOL N-(2-SULPHOETHYL)-AMIDE	9	9	9	9	9	9	9	9	140350	130220	130210	141910	63119	73021	66356	49864
5-Amino-6-(1-D-ribitylamino)uracil;5-Amino-6-(D-ribitylamino)uracil;6-(1-D-Ribitylamino)-5-amino-2,4-dihydroxypyrimidine;6-(1-D-Ribitylamino)-5-aminouracil;4-(1-D-Ribitylamino)-5-amino-2,6-dihydroxypyrimidine	781240	741060	842330	892960	874040	719340	835110	789610	38676	27049	42704	44816	276600	364500	317820	266160
5-Hydroxyindolepyruvate	27746	23202	28437	25884	20289	14917	57955	21450	9	9	9	9	355920	433830	364160	330360
6beta-Hydroxy-17beta-estradiol;6beta-Hydroxyestradiol-17beta	84195	56404	75022	87898	117810	77104	112410	125550	9	9	9	9	12594	18915	18268	11844
6Naltrexol	9	9	9	9	9	9	9	9	52835	27865	44120	45310	1193500	1362900	1249100	1451300
7-Oxodehydroepiandrosterone 3-acetate	5583700	3729600	4212300	5765300	3603000	4071400	4122300	4364200	68976	58764	64376	78045	44846	63446	63421	55144
8,9-EE-14(Z)-E	8998000	8992100	7703500	9278800	3451800	4243700	4311300	4736700	3640800	2710200	2740100	3655700	983990	1310700	1018500	801960
9(S)-HEPE	773150	760600	707020	980240	756420	671300	839320	949010	39512	46125	46726	51706	544990	773940	714440	601400
9,10-Dihydroxystearate	25330	21586	24521	26452	36524	33424	29961	41400	191670	129890	163140	124570	89729	120950	122080	90161
9-Riburonosylhypoxanthine	30777	22155	26840	24957	39123	60197	39056	45143	114750	106740	113530	135680	428210	654610	522790	432600
Acetoxy-8-gingerol	9	9	9	9	9	9	9	9	1856700	1511900	2102600	2426400	200930	116600	285250	99942
Aclacinomycin S;L-2-Deoxyfucosyl-L-rhodosaminyl-aklavinone	1049700	742310	736360	774390	812020	930440	990240	423030	179300	204620	180420	255350	676640	862340	666560	617230
Ac-Ser-Asp-Lys-Pro	9	9	9	9	9	9	9	9	771360	603060	627830	771600	9	9	9	9
Acylated phloroglucinol	9	9	9	9	9	9	9	9	21618	15653	12764	15666	9	9	9	9
AGC	206450	200810	189940	249430	217050	172320	245360	261290	142780	88641	91227	105770	1729200	2107800	1781100	1281100
Agrimophol	5926800	4065500	6612800	7297600	2160700	3153800	5732900	2606600	2290100	2175400	1868700	1993600	2310100	2797200	1720000	1909000
Ala Asn Arg Val Thr	322210	509770	283820	469230	848160	644310	860330	791990	9	9	9	9	726570	2300100	1922300	1302200
Ala Asn Ile Lys	565590	651450	1395900	1336400	4135400	1227000	12455000	2977100	373410	341390	425210	551960	161720	185910	283470	95051
Ala Asn Lys Glu Asn	3471800	3675400	3117100	4512800	4023300	2815100	4321600	4411800	97050	78736	118540	150970	1963700	2364300	2712400	1567100
Ala Asp Phe Asp	934480	1196600	1101900	1235500	1319700	702270	1354400	1254100	91681	103530	100810	128630	1020600	1340700	1424300	945690
Ala Asp Ser Glu	9	9	9	9	9	9	9	9	358700	270990	215890	235910	9	9	9	9
Ala Glu Gln	9	9	9	9	9	9	9	9	1011900	1096900	1445700	1047400	9	9	1957.3	15659
Ala Glu Val Asp	9	9	9	9	9	9	9	9	62936	56777	65521	60929	9	9	9	9
Ala Gly Leu Val Ser	376670	508940	401510	518260	371230	568430	660150	634320	9	9	21792	30932	159040	108520	180750	37654
Ala His Tyr Glu	1447100	1886600	1480500	2000100	1808800	1213500	2139400	1972300	86034	41125	44743	71779	2165700	3393800	2509200	2163200
Ala Pro Ala	170720	218670	184620	183680	180810	202490	192660	218650	166820	172280	137790	133290	149550	156560	168580	130670
Ala Pro Met	13329000	18083000	17136000	14836000	17967000	11872000	17861000	16535000	616860	571500	691290	733150	16308000	22711000	18657000	12319000
Ala Thr Ile Lys	1474800	1515200	1581800	1482600	1726400	1633700	2157500	1943200	1098000	1141400	1172100	842640	1222600	787060	931590	843530
Ala Thr Val Glu	9	9	9	9	9	9	9	9	1952600	2486400	2512700	2860500	31447	26864	32343	20989
Ala Val Ala Ile Gln	159300	149760	183730	137490	202020	253250	223610	187770	186480	179040	154340	123090	217070	269520	159060	283250
Ala Val Asp Asp	17677	16158	13949	21685	18969	18231	14948	20384	9	9	9	9	134010	147500	145980	135950
Ala Val Glu	48223	19567	38041	14903	35467	19945	29395	53410	5538400	3958200	4900200	4946500	6991400	7443400	6595400	5924100
Ala Val Leu Glu	9	9	9	9	9	9	9	9	490760	409550	359060	445960	9	9	9	9
Ala-Trp	985190	961040	918610	1168000	1037300	860910	1078000	1192300	21741	16381	20174	20700	757130	952630	785860	714820
alpha-Tocopherol acetate;Tocopherol acetate	9	9	9	9	9	9	9	9	41314	34054	35879	43705	12605	13964	11797	8013
AM-Toxin I	2006300	1776800	1605600	2259100	5132100	4505200	5126400	6193700	365370	291200	317220	398210	124760	185640	135890	117370
Anhydrorhodovibrin	1543500	1312500	1298200	1509600	1388600	1433600	1550600	1531700	1741200	1549300	1720700	2081900	1654700	1620100	1809700	2552300
Ankorine	2850200	1993500	2491400	3067100	3893600	2721900	4101900	4537100	21271	10343	15115	12782	183150	266140	229970	169210
Arg Asn Gln Glu	368460	413100	364370	479700	429830	302930	453720	527790	6206.8	4727	4357.7	8467.3	127880	110640	144440	73419
Arg Asn Gly	388000	383970	451840	337760	366590	318130	334710	375170	446980	391490	364310	489110	424730	381930	383550	472570
Arg Gln Asn	51775	44612	41216	21436	9	9	9	9	368530	386870	460260	441970	258580	500920	516200	471870
Arg Glu Trp	125750	122390	115330	132140	453420	419920	602740	562040	164680	122190	106410	172900	78155	109510	77929	78219
Arg Gly Leu	9	9	9	9	13327	31954	10343	17998	1151800	1104100	979480	650600	30330	51438	25523	33435
Arg Ile Ala Glu Glu	13532000	16291000	12061000	15762000	16802000	10165000	16238000	17669000	226580	215630	274530	309310	4572600	3353200	4654000	2570900
Arg Ile Asp Asp	4099800	4603500	4306600	4660700	4586100	3209900	4997000	4993200	96752	76234	108440	104620	5018700	6498800	6264000	4515500
Arg Leu Leu Asn Asn	2375000	2454300	2154200	3002200	2386700	1992600	2884600	2788400	69582	33577	54425	67119	813280	760730	835340	577050
Arg Lys His Arg	26494	28719	14686	21806	19023	13528	33033	33001	9	9	9	9	2683.8	11166	4275.3	5367
Arg Met Met	2251800	1804300	2753200	2850000	556940	781700	1243600	675540	1289300	1245400	1236500	1417200	1234200	1574000	1250100	1201000
Arg Phe Asn Ala His	9	9	9	9	9	9	9	9	1405800	1199100	1490300	1703500	9	9	9	9
Arg Pro Asp	126270	62915	130050	185470	15343	15339	532590	37652	9521.4	9894.5	13010	8198	15534	14036	10646	10749
Arg Ser Ser	268280	224520	228090	296480	285220	169390	297010	230570	9	5126.6	9	9	107780	91516	113500	70236
Arg Ser Tyr	5670800	5376300	5352800	5554500	5213700	5164000	4962200	3610500	5254300	5190500	5421300	4995000	4976200	5203400	5064000	5076800
Arg Thr Ala Arg	840940	908880	891320	976950	1272100	925160	1323800	1312700	816410	1076200	828350	863440	876110	638790	651300	651500
Arg Tyr Thr Glu	9	9	9	9	9	9	9	9	399350	237310	467420	455980	9	9	9	9
Arg Val Ser Leu Asp	6607100	7310200	5705800	8466300	6502900	5629400	8649900	8684600	193780	199400	152770	182770	18279000	20688000	25800000	14833000
Asn Ala Leu Ala His	168530	174500	159270	192560	196130	156640	224220	236740	9	9	9	9	60913	87413	76479	56034
Asn Arg Glu Ser Leu	284940	362430	226530	390780	490110	227440	550050	456400	21718	12335	28839	21069	128940	59726	131290	64006
Asn Arg Gly	20549	39410	30712	37255	22337	32009	35369	28617	34318	36079	37241	44599	40503	36272	35454	26225
Asn Arg Phe Lys	540650	440410	386420	444710	868030	961040	1157700	1182400	28696	14691	23413	17867	29135	61916	37842	35497
Asn Asp Leu Asp	9	9	9	9	9	9	9	9	144610	131370	165910	148600	179760	332120	313600	215370
Asn Gln Ser	1541500	1209700	1656900	2109900	2246300	2027700	2081500	2295600	9541.4	5091.4	5613.8	8625.3	864290	1033000	892510	749210
Asn Gln Val Lys	9135600	6266000	6963600	6432700	4700600	6112300	4223900	7154900	87894	118890	145470	174420	3135200	2898200	3074400	2643900
Asn His Val Asp	201480	176040	164860	227060	384960	364130	451280	417060	132270	88451	86384	140750	21470	28092	20636	16329
Asn Ile Lys Asp	18644000	17784000	17998000	15871000	10288000	11806000	11018000	14712000	100490	89137	82984	94002	3733800	2546100	4104200	2511400
Asn Leu Lys Asp	981010	787610	854510	904680	643660	742020	491370	748480	6229.5	5841.7	3909.2	5891.1	165280	145810	207260	126180
Asn Lys Ala Val Gly	8750300	10737000	8729800	14054000	13684000	7333800	13330000	11525000	376580	348330	513360	447010	4917600	5103800	5957200	4638800
Asn Lys Phe Asp	136940	181330	148390	143850	240330	93360	191220	164560	22761	43962	36425	58638	3505500	10216000	7021100	7057600
Asn Phe Ser Arg	1415900	1623400	1104100	1197200	1072100	1046400	1458800	1434100	40306	50347	51660	88689	739960	872750	865830	600260
Asn Ser Leu Arg	5410.5	9	4826.3	4177.8	9	9	9	9	1133500	881910	856070	828930	10176	12432	9862.4	11476
Asn Thr Gln Glu	104190	120060	100630	107770	120300	90835	138940	155690	9	9	9	9	28934	56320	60887	42911
Asn Val Phe Lys	2220300	2018900	2005600	2312900	2241200	1847700	1957200	2081800	2083200	1860700	2088400	2053100	2367500	2269100	2439400	2232700
Asn-Asp-OH	764410	761630	631850	547550	372080	331710	407300	366030	192770	164970	157570	137790	789740	665150	811670	853710
Asn-Leu	9	9	9	9	9	9	9	9	209370	200630	189100	229070	123410	164820	111460	143450
Asp Ala Leu Arg Thr	1002800	987670	996830	762580	573270	553180	434440	748060	9	9	9	9	168340	248080	231370	284070
Asp Ala Thr Glu	7982700	7985900	8025100	9838000	9996700	10857000	11712000	12537000	9	9	9	9	103570	200730	46643	91683
Asp Asn Ile	2682000	2450600	3248500	2804100	3674400	3238600	3029500	3525400	735320	683600	643360	628680	566990	506370	282550	171070
Asp Gln Val Leu Ser	13149000	15496000	14602000	17595000	18682000	14417000	21482000	18912000	45928	9	29768	49114	1376000	2980500	4007000	2000500
Asp Glu Leu	9	9	9	9	9	9	9	9	1097300	1336200	1233600	1198400	405890	468170	434340	313550
Asp Ile Thr	44328	56613	62113	56610	109510	112660	118090	123730	6620600	6334100	8312300	7039500	230860	244360	232860	202850
Asp Leu Ala Glu	9	9	9	9	9	9	9	9	45201	50429	42296	52192	794210	1088600	828070	753920
Asp Leu Lys Asp	8622600	7351500	7348500	9562600	8617800	9228900	9364400	11045000	47823	14232	24696	26896	159530	269740	202880	158260
Asp Leu Phe Arg	117810	98263	56863	116810	69048	49434	56088	88327	34417	17247	19735	28576	178360	177620	182640	165190
Asp Leu Ser	92122	85508	100530	68005	184660	116560	208130	213950	6446900	5785800	6795300	6705400	9	9	9	9
Asp Met Leu Asp Leu	9	9	9	9	20318000	20932000	21199000	25933000	2042300	2321600	1641400	2742500	3678300	4097800	3873500	3158500
Asp Phe Ser Arg	613990	728100	558450	537020	646820	591000	587010	560050	611360	529880	539230	616010	234100	280550	252510	188060
Asp Pro Gly	99208	131630	129380	131600	262640	65259	236540	112440	1954000	1048600	2102800	1471000	278790	304590	348390	210220
Asp Pro Thr Ile Glu	1841800	2061900	1487900	2047100	2596500	1712400	2505500	2340300	46523	55633	52175	44075	672150	864580	711640	598290
Asp Val Ala	9	9	9	9	9	9	9	9	15155000	13305000	20070000	13823000	9	9	9	9
Asp-Lys	5821400	6078600	4432200	5554000	1273800	1507600	1338900	1688300	1689200	744730	873220	1048600	2426500	3019000	2532200	1821500
Avermectin A1b;Avermectin A1a, 25-de(1-methylpropyl)-25-(1-methylethyl)-	8504.7	4446.2	4627.6	14849	38191	30435	43123	58196	9	9	1867	2569	9	9	9	9
Azomycin;2-Nitroimidazole	9	9	9	9	9	9	9	9	1304000	3156000	3915700	4558900	1902400	812750	504060	449640
beta-D-Mannosyl-1,4-N-acetyl-D-glucosamine;4-O-beta-D-Mannopyranosyl-N-acetyl-D-glucosamine	9	9	9	9	9	9	9	9	43394	39347	96854	161390	9	9	9	9
beta-Paxitriol;10beta-Hydroxypaxilline	916760	538470	460490	894330	819540	594010	1023800	1451400	9	9	9	9	9	9	9	9
Boc-Pro-Phe(NMe)-Gly-OMe	85532	57961	49311	106910	264450	238390	324390	419330	23945	16910	17306	34207	9	9	9	9
Chymostatin	367920	425500	352450	449860	422470	307180	507100	491710	9	9	13721	7735.6	50149	9	52973	9
Cinncassiol C2	5764200	6376900	5682500	6013300	6118600	4648700	6685100	6084100	939010	526350	672340	601950	2779100	3173300	4276200	2060800
Clavamycin D	9	9	9	9	9	9	9	9	703430	553870	615270	593850	23045	23542	21117	25932
CMP-8-amino-3,8-dideoxy-beta-D-manno-octulosonate;CMP-Kdo8N	9	9	9	9	9	9	9	9	432080	183400	430180	267820	9	9	9	9
Crocin II	318760	283330	237950	314680	296120	257640	341730	325690	9065.2	5114.2	5458.1	6636.3	120070	130990	126910	90146
Cucurbic acid	28222	33859	30553	25117	32131	26801	32261	33988	40234	34111	29419	31198	42880	30761	39936	29251
Cyclooctat-9-en-7-ol;(1S,3aS,4R,7S,9aS,10aS)-1,4,9a-Trimethyl-7-(propan-2-yl)-1,2,3,3a,4,5,7,8,9,9a,10,10a-dodecahydrodicyclopenta[a,d][8]annulen-4-ol	9	9	9	9	9	9	9	9	66860	40006	54647	57398	38145	57268	44651	34609
D-beta-Phenylalanine;(S)-3-Amino-3-phenylpropanoate	244150	185000	209090	258140	241690	227220	258930	290340	9	9	9	9	48436	67499	54898	27933
Decylubiquinone;6-Decylubiquinone;2,3-Dimethoxy-5-methyl-6-decyl-1,4-benzoquinone	9752900	7668200	7984300	9449700	7745500	9493900	8897200	10194000	200590	162990	188250	146210	89818	181420	129230	118500
Demethylphylloquinol	11286000	8872100	8696900	10794000	11172000	9963400	13142000	14007000	45077	11587	17484	20069	200570	400000	286700	266250
D-Erythrulose 1-phosphate	1435000	1461200	1498600	1365700	1202500	1297900	1209500	1160100	1915400	2191700	1924100	2081600	2036600	1853800	1951400	1885000
Desmethyl-betahistine(2-(2-aminoethyl)pyridine)	2619800	3007000	2905500	2793400	2871800	3379900	3032500	3162800	3219900	3494600	3602000	3381400	3350300	3074100	3470900	3571500
D-Glucosaminate-6-phosphate;2-Amino-2-deoxy-D-gluconate 6-phosphate	406660	415820	483410	501230	465430	422140	512320	525070	51618	54855	85478	67241	1167200	1408100	1091000	1207600
Diacetyl-10-gingerdiol	4922800	4630400	5258300	4627700	5229800	3882300	4099200	4584200	4358000	5112200	4969600	4045600	5398200	4323800	4167000	3463700
Diacetyl-8-gingerdiol	1070200	1197800	1177800	973390	879020	948470	742450	738750	1244400	1509700	1632200	1474700	1570300	1490600	1728400	1503000
DIHYDRO- -TUBAIC ACID	23152000	23204000	23734000	24622000	24791000	25046000	25358000	26976000	28013000	27578000	25987000	25344000	26934000	28748000	26876000	28460000
Dihydromethanophenazine;2-(Dihydropentaprenyloxy)-dihydrophenazine	264110	319570	312350	252450	272570	333720	334170	390350	235450	172480	219500	188510	302680	367120	383010	402480
Diprenorphine	272230	174480	154440	330150	964610	903840	1002000	1462700	52670	37203	40490	82646	9	9	9	9
Diprotin B	2933600	2678500	2922100	2863700	4407500	3103700	4351600	4139100	15012	9	9	9	19942	46802	35316	29224
di-trans,poly-cis-Undecaprenyl phosphate;Undecaprenyl phosphate;ditrans,octacis-Undecaprenyl phosphate	2797300	2187200	2149500	3036200	6523800	5697900	7290500	8303800	11801	5529.2	3244.6	5466.5	127610	206560	134170	121630
Endomorphin-1	470250	438830	455610	520560	527260	380820	524990	562660	18819	10603	18796	20107	44673	13357	30136	13646
Enterostatin human	11306000	13927000	9419700	10938000	13647000	8196200	15288000	13380000	352110	315000	526780	468300	6454800	11109000	11407000	7519700
Estramustine phosphate sodium	9	9	9	9	9	9	9	9	45775	44008	38164	49151	19770	20911	16446	10876
Etorphine	3730000	3408200	3199600	4705800	8097400	6628400	8202800	8885300	468680	340580	415230	505300	38145	78256	49837	37863
Fructoselysine	5478.4	6056	9550.4	7278.5	27418	18740	97034	28923	18405	29091	23394	41053	8527.4	5474.3	7531.4	4161.6
Fruticosonine	1299700	964970	1318300	1612600	3635000	2447400	3363200	3303000	26021	17265	22726	14827	144830	198340	193680	125500
Gal1-3Gal1-4GlcSp	384130	366120	384350	427500	416350	354260	421490	450750	9	9	9	9	107300	158640	138010	121830
gamma-L-Glutamyl-L-cysteinyl-beta-alanine	9	9	9	9	9	9	9	9	3768900	1679800	2261700	1826300	44943	41750	40245	46897
Ganoderic acid H	86293	72056	77499	95211	89613	80206	90680	101930	1213800	663880	821270	848300	10434	12547	10889	8910.5
GlcNAc1-3Gal1-4GlcNAcSp	9	9	9	9	9	9	9	9	53807	30009	36498	36580	9	9	9	9
Gln Ala Gln Ile Glu	2509900	2369200	2012700	2263000	2619900	1697700	3325300	3635300	84670	102140	78911	210930	20863000	39038000	27596000	24553000
Gln Gln Gln Glu Gln	233070	141620	150420	113710	207970	228120	301700	235170	192790	165430	195750	208610	344770	303160	314530	316610
Gln Glu Leu Glu	153950	179470	146960	192730	183700	137200	220600	247090	6399.8	6073.6	6252.1	7391.6	114660	156750	122520	88552
Gln His Phe Arg	9	9	9	9	9	9	9	9	473990	480650	452050	574190	9	9	9	9
Gln Ser Tyr Phe Val	115060	177550	152110	162130	161800	118440	176370	156190	9	9	9	9	154720	109600	115980	70789
Gln Trp Trp	22100000	26599000	21838000	24577000	24446000	17828000	27192000	20730000	686450	428320	543770	717160	19746000	24029000	29804000	15873000
Gln-Gln	4194800	3626500	4057900	3889300	4149200	3728000	5040200	4493700	74007	86234	100790	88521	2109800	2911600	2645300	2287700
Glu Ala Asn Lys Glu	9	9	9	9	9	9	9	9	9	9	9	9	562280	1198300	866170	727520
Glu Arg Asp	3302700	3380600	2696100	3409400	2657200	2656900	3245000	3366800	190070	149450	224450	240470	4339200	5439600	5745900	4370900
Glu Arg Leu	1833700	1486000	1801700	2046500	1263200	1586000	1494700	1375900	862450	590280	501990	802320	547110	1050500	464270	480100
Glu Asn Gln Glu	22786000	20443000	20977000	23977000	16880000	20503000	20579000	16899000	11026000	11804000	10733000	14408000	10125000	15555000	9362900	9724400
Glu Asn Val Glu	121340	121960	113600	9	113100	96709	136050	137340	11937	15749	7186	10793	44976	95483	29120	12819
Glu Gln Lys Asp Arg	176130	219470	165470	242350	234330	129950	204530	233970	9	9	9	9	67501	82249	87979	46367
Glu Gln Phe Arg	19158000	11887000	13589000	18941000	3496700	3597500	4228000	5089800	74526	36078	41348	53969	180070	190820	110660	150030
Glu Glu Met Ile Ala	16136000	14545000	13126000	12190000	6090800	10060000	7253200	7549900	9879300	7884000	8950600	11310000	3232100	3860000	3610800	3023800
Glu Gly Val Tyr Ala	9	9	9	9	9	9	9	9	1038400	893910	1086900	806060	9	9	9	9
Glu Ile Ala His Gly	14991000	19226000	20660000	21693000	19323000	12686000	23274000	23236000	9	9	9	9	1671000	3015800	2364900	1909100
Glu Ile Glu	9	9	9	9	9	9	9	9	647070	399750	517490	492960	10549000	11977000	12158000	8956200
Glu Leu Gly Lys Gln	1867700	2164900	1692500	2174000	2527100	1827900	2601200	2433300	65465	46295	50423	59335	666120	901000	765220	531460
Glu Lys Leu Thr His	2060700	2750400	2008400	2941900	4115900	2634800	3570400	3142000	44960	56162	52261	71177	5921200	14770000	9341400	8182400
Glu Lys Tyr Ser Asn	9	9	9	9	9	9	9	9	3769300	3027200	3663500	4276800	9	21624	9	9
Glu Met Leu Val Ala	24701000	29106000	21702000	29657000	26991000	23916000	36906000	33263000	576280	390700	473540	652460	10289000	8645500	10381000	6579500
Glu Phe Leu Lys	12413000	10671000	12071000	10108000	6273100	7934100	4260800	7553800	22468	38793	19837	37503	1044800	1771200	1488400	1430000
Glu Ser Thr Lys	1736700	1573200	1410800	2058800	1460100	1378400	1599700	1854200	9	9	9	9	79205	111740	88547	80386
Glu Thr Phe Arg	6494600	6153300	6018900	7073200	6507800	5044000	6666100	5940500	98224	79911	92017	88651	772160	349310	661190	286220
Glu Thr Tyr Glu	142250	154000	120870	155090	138660	107400	152730	153140	9	9	9	9	56048	77535	79241	68019
Glu Tyr Ala Asp	391010	431980	360060	410750	523490	440660	486920	490880	20146	14629	16394	19878	73376	102510	141310	90950
Glu Tyr Asn Lys	9	9	9	4077.8	9	9	9	9	717630	512640	446130	686950	9	9	9	9
Glu Tyr Ile Glu	153440	156210	192640	187630	128060	139080	160620	129010	113820	164870	155320	139650	142930	219320	141310	122270
Glu Val Gln Glu	549120	589590	570470	653590	615810	537440	635820	774410	86831	60351	67908	67309	397820	483490	452910	364980
Glu-Ile	1502900	1596000	1441400	1475600	1878500	1138900	1693900	1933300	63888	40202	66127	85147	1645800	1532600	1699900	1197000
Gly Ala Asn Val Arg	1105800	1467000	1080000	1284500	2066500	1210900	2704800	2214400	11230	34201	39109	32928	2034500	3320300	2920000	2223300
Gly Arg Ala	9	9	9	9	9	9	9	9	131030	182040	178570	139870	730350	502630	543560	527080
Gly Asp Ala Asn Thr	1703600	1833800	2041000	1998600	2108600	1666400	2237100	1941900	1071400	864770	924340	1293500	3604800	4628200	4133300	3244000
Gly Glu Tyr Ser Val	6367000	6404100	4796700	6199600	7136100	4900700	6956700	6766600	268780	192770	321470	246690	6694600	7623800	7306600	4623600
Gly Gly Asn Glu Glu	5492400	6254300	5683300	5878500	5316200	5489200	5850500	6850700	480690	767700	355770	718010	1993100	3632900	1851000	2271600
Gly Gly Gln	5401900	4297500	4865000	5758700	4579800	4185500	4902000	5323700	7023.5	7746	10142	14382	3282700	3426300	2697200	2308000
Gly Gly Thr	9	9	9	9	9	9	9	9	4656400	6201600	7925200	4860300	295520	349160	287990	660700
Gly Leu Arg Asn Gln	6021400	6508200	5864400	7428000	6928300	4560400	7191600	6503800	140880	133720	152550	138450	2153400	2032200	2278100	1500600
Gly Leu Arg Val Phe	323750	403490	383980	343420	353980	288860	452380	412920	291540	574250	401340	374130	364840	271030	278340	251010
Gly Leu Asp Val Trp	1376000	1444500	1326600	1509200	1438600	1362600	1395300	1688900	1339100	1348400	1260000	1520600	1485400	1575500	1562400	1598700
Gly Leu Glu	2225000	2251800	2500500	2330500	2686300	2223800	3232500	2889700	6219200	3280600	5601900	3546600	318300	9	9	9
Gly Lys Phe	4940500	4815600	3864000	6188600	4800600	4126700	5453100	5216400	267900	276510	323680	308680	6247000	7850500	6655200	6005200
Gly Pro Arg	9	9	9	9	9	9	9	9	2048700	1961100	2104100	3009500	9	9	9	9
Gly Pro Gly	9	9	9	9	9	9	9	9	581570	632220	697090	582960	2771300	2960200	2463400	3779900
Gly Pro Val	33510000	34998000	36519000	31724000	33800000	27395000	39512000	41060000	96712	173720	187930	290320	526140	856740	1054200	871400
Gly Val Leu	9	9	9	9	9	9	9	9	385640	337200	418820	410740	1365100	1071200	1032500	831700
Helveticoside;Strophanthidin 3-O-beta-D-digitoxoside	9	9	9	9	9	9	9	9	190080	111780	119760	112460	9	9	9	9
Hemibrevetoxin B	72801	66891	70639	81493	79897	64056	92391	103750	1177600	660360	830120	802920	9	9	9	9
His Ala Arg Glu	982250	1082100	861820	1116900	1192900	810320	1181600	1075400	64701	38742	67215	51297	180940	22696	84857	20790
His Ala Gln Lys	1098600	1000700	950530	1168800	3764200	2692400	4016400	3736500	224120	191250	221710	199670	353790	388230	379030	284500
His Ala Val Asp	9	9	9	9	9	9	9	9	1232200	985900	1690700	1583900	9	9	9	9
His Arg Phe	1536300	1276600	1910300	2624300	4153600	4052000	4903200	5712600	9	9	9	9	615110	989550	742950	681620
His Asn Ile Asp	318650	266970	237620	337140	379360	393990	455600	450150	16398	9868.6	11872	15342	15570	32034	23468	23083
His Asn Phe Lys	3362800	3555600	3192700	3240100	3528700	2626100	4049200	4105100	235320	175290	247400	187000	1331600	2516500	2607900	1601600
His Asn Thr	9	9	9	9	9	9	9	9	22695	34263	31948	47509	80294	88349	52013	61694
His Asp Tyr Lys	1045200	1124300	970560	1227800	1164700	958910	1265400	1394600	69940	61125	51766	65397	1024100	1454800	1141900	957110
His Gln Val	3290700	3006400	2804800	2730100	3000900	3254600	3145400	3485300	3343100	3324200	3067700	3392900	3294600	3625100	3284900	3415100
His Glu Phe Glu	9	9	9	9	9	9	9	9	50892	51565	77006	67831	9	9	9	9
His His Ser Lys His	10509000	12490000	10628000	11388000	10339000	8333500	13127000	13447000	248570	159330	221490	226470	4028300	3688900	4326000	2616100
His Leu Met	1133400	1234300	994640	732920	957320	957090	1217700	1358800	46831	25514	26298	74825	187200	66802	144610	42763
His Lys Ile Asp	1342700	1457600	1272600	1522700	1904800	1285900	2059800	1940000	79600	68706	87305	86581	1219900	1074700	1287500	702310
His Phe Arg Asp	137060	135820	132900	154190	119220	107750	130990	180970	9	9	9	9	16530	40200	40266	20117
His Pro Ile	606470	910590	757580	663850	3074700	1184000	5727600	3529600	849250	929350	905730	866840	564180	1129500	928430	768080
His Thr Lys Lys	9	9	9	9	9	9	9	9	84217	38608	56401	50692	9	9	9	9
His Tyr Ile Asp	614150	818600	690890	931710	662540	580540	694480	646570	43456	63714	59111	71594	642430	860800	858640	692780
His Val Arg Asp	5501900	4276900	4104100	5686800	4922600	4585000	4963800	6434200	9	9	9	9	311870	568880	483620	384170
His-Nap-OH	263250	219550	183110	234720	206330	208080	216650	207600	220220	207330	273740	232750	266320	287540	305220	269510
Homocapsaicin;Homocapsaicin I	6128100	3867300	6173500	6725000	14611000	9839700	14000000	15716000	102240	47701	52260	46128	1218200	1673000	1651900	947610
Ile Arg Asn Asp	110210	110020	118760	108940	128570	131210	151370	156610	119140	124280	119730	111760	118410	109970	112240	107510
Ile Asp Glu	9	9	9	9	9	9	9	9	1788900	1757600	1850700	2430900	9	9	9	9
Ile Gln Asn Glu	279760	306710	263740	314830	312100	255030	332810	425340	9	9	9	9	17868	24110	15439	11634
Ile Glu Glu	1622100	2159800	1582500	1900700	2579200	1914700	3282400	2828700	9	9	9	9	1559500	2957500	3139000	2381500
Ile Glu His Lys	160970	183200	158600	209090	152780	149030	170670	184250	9	9	9	9	83792	111850	102600	59220
Ile Gly Val	5338800	13533000	6907300	9760700	25669000	13312000	45751000	28748000	9	9	9	9	44054	173980	164680	165140
Ile His Asn Glu	656960	624980	565360	582800	728760	741580	681940	730760	135500	93080	79445	103580	287800	378390	350790	321510
Ile Leu Ala Asp	9	9	9	9	9	9	9	9	1637600	1280900	1530100	1287000	9	9	9	9
Ile Phe Gln Glu	195890	195030	195780	200470	238360	195380	208610	234460	11942	7094.2	11488	12629	223630	266290	262940	190230
Ile Phe Val Lys	484670	717360	524520	685850	1032100	508400	1570000	1114700	52898	56962	50824	69725	775140	887290	901780	720960
Ile Thr His Asp	11515000	7837200	8171800	11723000	8481600	8850200	11393000	11605000	91703	41242	43474	60907	308070	334060	242240	284540
Ile Thr Tyr Asp	509500	479130	399620	599490	1132400	891860	1257500	1413200	481950	219620	207150	342830	52374	63964	52784	41486
Ile Val Leu Glu	2198800	2581700	2499400	3117300	2630200	3514000	3159300	2906200	3058700	2659400	3153200	3351100	3768400	3270000	3402600	3193800
Ile-HoPhe-OH	9	9	9	9	9	9	9	9	46769	47779	41629	47108	596590	673030	720290	452670
Indole-3-acetaldehyde oxime;Indole-3-acetaldoxime;3-Indoleacetaldoxime;(E)-Indol-3-ylacetaldoxime	160620	117590	150190	178470	247750	218260	243500	311610	6187.7	5115.4	4082	4667.8	22069	26362	22624	15988
Isoandrocymbine	9	9	9	9	9	9	9	9	24948	25363	14174	12019	9	9	9	9
Juvenile hormone II acid;(2E,6E)-(10R,11S)-10,11-Epoxy-3,7,11-trimethyltrideca-2,6-dienoic acid;(2E,6E)-(10R,11S)-10,11-Epoxy-3,7,11-trimethyltrideca-2,6-dienoate;(2E,6E)-10,11-Epoxy-3,7,11-trimethyltridecadienoic acid	9254700	9574500	8816300	9770200	6440600	7392100	6946800	7583800	94492	76174	55622	48628	84792	107210	79959	71550
Juvenile hormone II;Methyl(2E,6E)-(10R,11S)-10,11-epoxy-3,7,11-trimethyltrideca-2,6-dienoate	234710	208290	244250	249910	188520	136120	184810	162530	11897	10044	9	9	108560	179750	54758	118190
JWH 018 N-pentanoic acid metabolite	9	9	9	9	9	9	407.54	9	110750	116620	110700	107210	387590	471240	456630	319970
JWH 210 N-(5-carboxypentyl) metabolite	24893	38639	37246	14980	32563	44193	42425	38651	8292.9	15577	28644	24213	4292.4	27542	25252	15609
JWH022	5261600	4278500	4400600	5385100	6098100	5538000	5871200	7200600	49445	35217	45464	39475	43367	53095	41296	40519
Kalkitoxin thioamide alcohol	2185600	2510700	2483500	2499300	2491500	2150300	2633700	2005400	2676000	2349500	2633800	2472100	2556100	2244700	2600100	2488600
Kikkanol A	133780	138130	154980	138550	156970	146340	155470	147730	166120	195520	148850	149990	161280	154740	151460	159350
L-a-Lysophosphatidylserine	8413000	8620000	9314100	9605000	9040600	8401000	8219700	8347900	8763700	7827000	7765600	8656300	3037700	4030800	3300100	2535600
L-beta-Phenylalanine;(R)-3-Amino-3-phenylpropanoate	9048300	8919200	8742200	9834000	8919700	8446300	9117900	9722900	3713700	3486800	3412600	3306700	6051100	8375100	5983500	7101100
Leu Ala Arg Glu	1144400	1131700	1087900	1200700	481130	472370	503160	538590	475340	334040	326470	493780	140990	166400	132720	108890
Leu Ala Glu	553890	654590	589880	783330	800360	580170	844440	735690	60334	46376	63283	52489	725340	885650	756010	537820
Leu Ala Gly Glu Phe	9	9	9	9	9	9	9	9	2667100	2203800	2335400	2388000	9	9	9	9
Leu Arg Gly Gln Asp	1009500	1051200	925200	1113500	1097300	791780	1206900	1214200	31237	23564	24260	25148	572750	757220	664650	531420
Leu Gln Lys Ser Leu	442270	448680	453200	508240	478250	371020	535030	553800	9	9	9	9	62418	40794	68789	47615
Leu Glu Ile Glu	247010	257270	228050	284090	275150	208070	367090	342700	10440	6518.8	8211.3	11713	203310	368100	327120	232530
Leu Glu Lys Glu	1020500	975250	857840	1131400	1324100	1143700	1458100	1614600	63549	47404	59525	82238	27168	50424	38400	40889
Leu Glu Phe Glu	618770	472770	435400	611800	5247000	5489900	6597800	7195800	252430	180310	133360	235460	645040	681410	633600	485660
Leu Gly His Phe Met	57230000	56572000	60247000	60056000	65590000	47356000	67470000	66999000	1901100	1554300	2118700	2121900	17591000	10242000	17582000	9677400
Leu Gly Val	424330	101960	223110	266910	19450	59989	156990	23804	19302	26593	16855	25893	18274	21578	23402	19677
Leu His Phe	8100.4	9	9	9	10035	9350.7	9	9	9467200	8450300	17518000	12493000	9	9	9	9
Leu Ile Glu	546870	553620	509270	626680	593740	413260	637730	678570	11079	14875	12388	24421	367920	436170	314030	266390
Leu Ile Glu Glu	9	9	9	9	9	9	9	9	40301	31422	32976	34241	9	9	9	9
Leu Ile Tyr	2592700	3371600	2360500	3027100	6372900	3673900	8412600	7535700	53186	43635	55119	50209	290650	737340	352370	485690
Leu Leu Ser Pro Tyr	2319500	2759000	1817500	2029700	3704700	2200200	4229200	3691700	47809	46011	40931	44800	85017	64235	165450	72360
Leu Pro Gln	67254	51192	26501	51176	79782	37869	78976	59992	7964.5	11944	9139.5	13445	338910	384110	366390	258030
Leu Pro Thr	3516400	4286500	3410600	3866900	5206000	3346900	5799500	5782000	93708	90929	116320	143570	4792100	5436500	4783900	3159600
Leu Ser Gln Pro Lys	221620	126000	175920	218960	9	9	9	9	81683	108340	90567	83539	34446000	53596000	59762000	49743000
Leu Ser Leu Pro Glu	204220	223770	180820	214730	191330	162150	235500	232500	9	9	9	9	546480	732410	616960	472010
Leu Ser Phe Gln Asp	9	9	9	9	9	9	9	9	2959400	2821500	3159900	3584600	9	9	9	9
Leu Ser Ser	1079200	1073500	923500	1192000	1242200	838770	1261700	1261700	28130	21132	28797	18538	316360	245330	337420	163340
Leu Tyr Asp Lys	9	9	9	9	9	9	9	9	350070	406620	538680	536320	9	9	9	9
Leu Tyr Val Lys	38668	30189	34264	52417	202180	145190	253350	264270	133730	150400	113110	111270	1132700	1694700	1242500	1190100
Leu Val Val Val Asp	1823500	1178300	1120400	2109700	4142000	3345800	4995300	4212000	54549	31444	19780	23415	31683	46531	48020	23127
Leu-Gln	4293100	5758800	4603700	6163200	6244500	3558400	6400900	6119300	183510	199990	231030	220570	4774600	7492100	6728800	5154900
Leu-Glu	2699600	3044200	2509500	3578600	5019000	3400500	5148200	5347500	45213	33850	35561	29941	128790	193840	125610	115410
L-Histidinol phosphate	17122	17221	16401	12064	21091	47756	49798	21967	790540	641830	623980	777600	12973	29143	21179	17719
Lobelanine	174550	122410	161290	130850	202290	227080	258550	333130	29110	46231	36407	19350	25039	69173	27242	31404
Lolitrem K	2722800	2951700	3009100	2628300	3283100	3813300	3106000	2965100	4602000	5924800	5524700	5112900	6324800	6249800	6532300	6544400
Lys Arg Leu Glu	1416100	1368800	1458600	1408300	1403900	1564900	1511100	1579200	1689300	1600100	1726800	1661600	1742000	1795700	1815300	1605400
Lys Asn Thr	6370700	6252800	4921800	5196100	6004500	5375900	6430600	5395800	5558300	5160800	6529800	6354700	5572100	6881700	6464500	5487500
Lys Asp Leu Glu	9	9	9	9	9	9	9	9	27295	19220	20092	26802	9	9	9	9
Lys Asp Thr Lys	38485000	72405000	33704000	75307000	119770000	56802000	150140000	108960000	2768900	1757300	3148900	3421300	1444500	1640400	3760700	1309200
Lys Gln Phe Glu	9	9	9	9	9	9	9	9	94816	42465	64353	65103	9	9	9	9
Lys Gln Ser Glu	15892000	19199000	13461000	25123000	45213000	18580000	47939000	34676000	66241	23118	67225	88041	2012400	9455900	13562000	5952900
Lys Gly Gly Asn Glu	3150400	4010500	2983000	4051800	4093700	3102100	4990400	4664700	123730	90868	143550	128190	1306900	744060	902540	567430
Lys His Ile Glu Glu	9	9	9	9	9	9	9	9	714500	424900	535490	553450	9	9	9	9
Lys His Met	1566700	945570	1480200	1756400	227400	478640	883180	232550	251250	216220	174900	229140	214200	271180	151470	149790
Lys Leu Ala Glu	888170	592090	1001400	1031700	394140	301140	831420	316220	200730	217790	213930	257160	325450	340350	245300	288010
Lys Leu Asn His Gln	9	9	9	9	9	9	9	9	365250	296160	458440	456640	176860	184730	205520	173030
Lys Leu His Glu	134900	55654	62153	103190	47174	50163	159150	177980	37810	15062	11887	16741	10935	12607	6321.4	7342.6
Lys Met His	1493300	927370	1946500	2085500	335470	655100	1175500	458570	687410	494610	340770	434100	458820	454050	347380	344220
Lys Phe Glu	7337200	7297000	6932400	8350000	6784600	6220300	7477900	7434000	257330	239430	298800	341180	9008100	13983000	10782000	9543500
Lys Phe Leu Glu	888820	880800	860510	954080	1090200	815670	1102400	1099600	29888	22690	38213	38931	2838800	3458600	2627100	2424300
Lys Phe Thr Asp	7076800	7145900	6888000	6491200	4361000	5553200	3415200	3797200	5296200	4468800	4725200	5812300	2450700	2702300	2083200	1906200
Lys Ser Asp Glu Met	4847000	4626100	4454800	4322700	3678500	2720800	3421100	3729400	296580	186260	214570	290900	1963500	2545700	2068200	2029000
Lys Ser Phe Glu	199540	175130	201400	198520	216620	153650	266500	219950	25871	13499	17630	26733	210230	189400	181110	135460
Lys Thr Glu Lys	12238000	25853000	11851000	25365000	56529000	17592000	81364000	48580000	1522400	1289300	1602500	2178800	1355200	1368400	4476500	1207900
Lys Thr Glu Lys Ala	2291000	2236900	2880600	2986000	1989800	2080200	1994200	1892500	1515000	2558500	2599500	2414300	2527800	3227800	2088300	2105100
Lys Thr Phe Glu	1771500	2163600	2018600	208500	7465600	7325100	7506100	9508100	908950	911570	659280	1214700	1521300	1659500	1599900	1214400
Lys Thr Tyr	348970	413590	295340	392640	408010	244820	426930	349760	9	9	9	9	432010	494740	493210	391080
Lys Tyr Thr Ser Ser	9	9	9	9	9	9	9	9	2934600	1932000	2442500	2808900	9	9	9	9
Lys Tyr Val Met Leu	889530	1409700	1335700	956390	1064100	829000	1176000	1769100	48160	42557	51127	53556	646160	454450	676800	374580
Lys-Abu-OH	194820	216190	162350	194880	187030	156060	217670	218750	128110	115720	108620	118380	731890	1071000	916360	715300
Lys-Lys-OH	37769	39962	39130	45735	46271	38502	41694	48347	471800	391490	408040	483720	1179800	1583300	1412700	1041500
Lys-Thr-OH	9	9	3929.4	9	9	9	9	9	53924	39880	42537	43351	42903	38596	37112	45161
Magnoshinin	261780	100770	298880	343420	59439	41529	185790	59406	11620	13027	16442	15760	20558	16368	13954	19527
Malonamoyl-CoA	1235600	1212000	1015100	1965200	626420	587550	972400	1019800	9	9	9	9	29832	50834	36215	39200
Maltohexaose	9	9	9	9	9	9	9	9	100540	80509	183220	97405	21997	24712	20914	56840
Mannobiose;beta-1,4-Mannobiose	48293	38382	47258	62750	69332	50415	69859	83865	401840	384550	634960	507120	404840	525530	362960	352650
Mesoporphyrin IX	96004	80787	62966	80434	155410	191670	234100	241790	9	9	9	9	3892.1	7039.3	4754.9	8718.6
Met Asp Gly	937550	915490	936820	974810	954650	837520	1013700	948140	776500	730550	771400	707560	861490	1009500	917330	900000
Met Lys Asn His Leu	24755000	33751000	21152000	33212000	22926000	16460000	36939000	24924000	470720	515680	557380	672700	12681000	11914000	13677000	7396700
Met Lys His	12199000	5870000	15201000	14903000	3807500	3556500	15986000	4092600	2470600	2452800	2566500	2292300	2275600	2454200	2187400	2513200
Met Lys Phe	15614000	15492000	18687000	18124000	19939000	12635000	17892000	18556000	217380	229010	243890	296680	10263000	10822000	12098000	11853000
Met Met Phe	5618200	4979700	6490400	6400100	7184000	6662500	7767600	5470700	248720	216390	265450	310430	3673800	5620900	4892800	3473600
Met Pro Leu	110060000	106990000	114690000	113900000	68462000	71846000	66438000	68594000	429410	497850	499710	559980	1550400	4342900	7133200	4030500
Met Ser Phe Thr Phe	160550	127420	133830	149290	133790	133720	137970	131540	152080	129520	162100	143080	137730	178800	168860	176010
Mirasan	284410	281250	275900	270200	257710	302230	313150	296240	282280	303980	250900	276750	263420	291010	258940	268040
N(6)-[(Indol-3-yl)acetyl]-L-lysine;N6-[(Indol-3-yl)acetyl]-L-lysine	940960	881800	907310	993400	1109300	881520	1139000	1347400	15112	13953	17198	21190	223690	261270	285830	174790
N-[1-[4-(5-Chloro-2-oxo-3H-benzimidazol-1-yl)piperidin-1-yl]propan-2-yl]naphthalene-2-carboxamide;hydrochloride	640280	485650	724360	819440	1031300	944750	790660	1142500	9	9	9	9	431050	533870	489040	355030
N17-Dimethylindole-3-carboxaldehyde	1544400	1585600	1763600	1579700	1522800	1666400	1704300	1621700	1683900	1659700	1583500	1269700	1425500	1307800	1390000	1256900
Nap-Ala-OH	15712	26128	26371	34788	41977	22273	18374	12559	1069900	1051500	941910	996050	11907000	12882000	17619000	12714000
Nap-Lys-OH	212310	263980	231060	250450	312610	242790	277390	346610	9	9	9	9	72521	106030	114930	55047
Nap-Tyr-OH	167700	149450	142540	160010	125170	140170	135490	152170	164750	184510	123430	174980	144530	156360	167560	174780
N-methylundec-10-enamide	34568	24950	45361	24494	33814	21016	26511	30039	25285	18899	22925	18478	8512.2	11211	9720.8	23926
Nomilin	65253	47882	51300	68572	122120	105710	154280	161990	9332.2	6189.3	4491.5	6801.7	9	9	9	9
Norbelladine	9	9	9	9	9	9	9	9	106170	72387	78200	84384	202380	411270	382380	291770
Obacunone	808370	507980	955360	1062900	180130	257670	439520	298940	217290	252760	231150	193140	268680	286310	260970	169850
o-Hydroxylaminobenzoate;2-Hydroxylaminobenzoic acid	9	9	9	9	9	9	9	9	12914	25883	23594	27982	72007	35183	63899	47601
Oleic Acid-biotin	1566000	1595900	1678000	1504500	1894500	2018000	1947600	1898700	2225400	2436900	2245700	2041800	2279900	2489400	2500000	2212800
omega-Hydroxyphylloquinone	9	9	9	9	9	9	9	9	58617	38460	38263	29488	110110	102500	92972	92872
Pantetheine 4'-phosphate;4'-Phosphopantetheine;Phosphopantetheine;D-Pantetheine 4'-phosphate	9	9	9	9	9	9	9	9	614440	578720	495520	586000	6266000	8755400	9849700	5907600
Penitrem F	480910	474430	433600	446960	689940	860450	720300	726410	235320	199680	209310	313320	295900	394510	341620	329370
Perazine	1587700	1121600	1491900	2081700	1028600	573250	1355500	1157900	7883.5	2984.3	3118.5	2016.1	2919.5	2458.3	3026.8	2153.1
Phaseolic acid	24101	33131	16462	12405	9	9	9	9	258820	344660	231760	330160	9	9	9	9
Phe Ala Arg Asp	3108800	3029100	2850300	3539000	3687100	2551100	3929600	4068200	10411	6033	2205.1	9202.4	1117900	1131500	1111700	756120
Phe Arg Ala Asp	35327000	35809000	29836000	41142000	40750000	29324000	40745000	42962000	80164	28367	59706	124140	10929000	12635000	14574000	7754800
Phe Arg Asp	49893	16275	59266	61886	343860	204890	22010	241820	11672	10507	12296	12682	14613	26007	13178	15611
Phe Arg Thr Glu	179910	201840	164570	223170	21013	23848	17241	28794	126370	100270	99548	151200	14467	17876	15504	13930
Phe Asn Ile Glu	9	9	9	9	122.31	9	9	9	87328	65125	63498	78609	9	189.65	9	9
Phe Gln Thr	333750	325830	278750	348820	355290	234310	425670	340030	8793.9	9	10993	7446.3	201210	169010	176150	105080
Phe Glu Asp	131560	62200	76544	72338	60883	59155	46550	120470	1630400	681080	1340700	988680	172700	288110	194220	148650
Phe Glu Ile Arg	9	9	9	9	358790	324330	400020	425080	50217	37591	42054	62342	82744	103790	79456	64157
Phe Glu Ser Phe Gly	799090	752320	720090	908670	973050	686140	1046000	869410	9	9	9	9	81655	79258	74844	64240
Phe Glu Val Glu	706360	507890	489360	683310	702560	625870	842580	958950	64915	51446	67947	68651	6923.4	17722	14801	9816.8
Phe Ile Glu	155540	141080	134750	168790	165000	133840	174270	167500	10403	4917	10220	6001.9	205570	287260	247340	178210
Phe Ile Leu	1421400	1896000	1223900	1858600	3101100	1502800	3178500	2944400	103740	94664	109940	134910	1840800	1889100	2262000	1402800
Phe Leu Glu Lys Asp	603670	640250	558020	608720	743330	494540	759050	762500	24638	13966	24728	17580	747950	904750	868360	598620
Phe Leu Tyr Asp	126240	133580	106360	161830	206950	117510	198900	205750	9	9	9	9	23338	49031	33332	16101
Phe Lys Asp	686270	689120	741430	841870	803680	782450	778040	770230	659940	592490	645830	487340	542410	518140	525720	438050
Phe Lys Thr	252170	171860	231560	243720	186100	172480	241150	221370	138350	94771	109630	118090	155320	228410	236380	169490
Phe Phe Thr	54464	31450	41310	57529	34425	60001	51597	59778	3791300	3343500	5453300	3966600	19168	26249	22877	23044
Phe Pro Ser	404650	434000	485150	390980	512920	359040	507740	511700	122410	128060	158270	149210	965040	1571200	1498900	1171600
Phe Thr Arg Lys	199480	129830	127470	218210	102770	124240	142380	137720	8993.5	9238.6	8403.7	10182	7974	11745	7261.2	10742
Phe Thr Lys Lys	1743500	1337600	1362400	1735300	1822100	1502000	2058400	2257000	12034	9	9	3152	35553	68317	50998	46076
Phe Thr Tyr Asp	9	9	9	9	9	9	9	9	504170	369370	420990	415360	9	9	9	9
Phe Tyr Leu Glu	11164000	14394000	11530000	13080000	13432000	10431000	15030000	17470000	429030	276060	386700	445570	7963600	11143000	10023000	7138300
Phe Tyr Ser	666640	453240	784900	626970	474030	498970	370200	598240	27156	62352	63960	58346	342840	409220	448230	358800
Phe Tyr Thr	480940	464370	426690	575550	590090	483060	594850	628790	9	9	9	9	192240	186770	195720	168840
Phe Val His Arg	9	9	9	9	9	9	9	14242	227630	418470	245470	278590	243700	342000	241380	223360
Phe4Cl-Gly-OH	1056100	1058900	1106400	1096100	1080400	1155900	1173000	1134200	1192900	1239400	1097900	1172500	1075000	1179100	1134700	1149000
Phe-Abu-OH	9	9	9	9	9	9	9	9	21227	24805	17212	17072	105560	73750	76686	77485
Phe-Asp-OH	4560300	4644000	4842800	4817600	4802900	5016800	5015900	4988800	5050800	5556600	4690300	4942700	4462400	4837100	4640400	4713700
Phytyl phosphate	20289	15552	15529	16085	15722	12799	15751	19447	38661	32990	26154	37787	58068	80382	41365	53865
Pleurotin	1245500	760990	892180	1780800	11195000	11071000	11840000	14459000	9	9	9	9	40503	96699	38701	30750
Pro Ala Asp Lys Thr	404090	433380	543960	723300	427740	449070	769690	593040	398460	392860	730630	431100	744380	410920	413590	380660
Pro Ala Glu	3085100	3036500	2821300	2667100	2639700	2021400	3522600	3057000	86524	106330	112540	110930	2648700	3576400	3134500	2166800
Pro Ala Gly	1520400	1420500	1239100	1599400	1328900	1114600	1738800	1757900	9	9	50467	63702	455100	484960	504780	402430
Pro Ala Leu	8338300	5520000	7535400	8335000	6039000	7333200	7027700	10147000	963190	887860	668450	876640	1081300	2437800	379150	1558400
Pro Ala Phe	292920	314370	292040	371830	332510	262130	324120	404080	18368	19226	26124	31867	398900	543500	470930	327870
Pro Arg Trp	5978400	7396000	5331600	7884700	8089500	6437600	11705000	10452000	228820	207450	224590	196870	1455500	990010	1611300	730720
Pro Asp Leu	6421100	8033100	5745500	10480000	14885000	7229600	16248000	14553000	387750	411700	497010	495800	9250800	9212400	10310000	7110200
Pro Asp Thr Gly Ile	3104700	3071900	2701100	2973700	3113700	2599500	3219400	3293400	861810	787500	996570	883790	4432400	3921600	4417100	3586800
Pro Cys Glu	1678300	1222500	1904500	1186100	569810	822240	247040	426670	8063.1	5458.6	9354.5	8034.6	266140	790700	370960	512670
Pro Glu Ala	9	9	9	9	9	9	9	9	6115500	4700200	5620900	5320900	701440	779960	744660	631990
Pro Glu Glu Lys Ser	2735900	3389400	2981900	2935600	3260500	1885200	3398200	3826500	233030	177720	216060	142730	3595500	4318200	4154800	2985000
Pro Glu Gly	9	9	9	9	9	9	9	9	19211000	13738000	27021000	18266000	9	9	9	9
Pro Glu Thr	9	9	9	9	9	9	9	9	22708000	14975000	20755000	23264000	9	89100	67676	72374
Pro Glu Val	210150	260050	216530	273270	370440	184350	281440	376520	2407700	2237700	2639700	2678600	2920800	3861500	3288500	2406600
Pro Ile Asp	638990	746590	495860	605820	906520	503230	1169100	861010	27145	18641	36584	40635	605420	508850	523340	296150
[truncated: 159 more rows]

## Sheet: Supplementary File 1g
Differential Compounds				Common metabolites in “K12 vs HK-K12” and “HK-K12 and HK-yfbR” out “K12 vs HK-yfbR”
[truncated: 463 more rows]

[truncated: 1 more sheets: Supplementary File 1h]
