# Supplementary material for: UPRER–immunity axis acts as physiological food evaluation system that promotes aversion behavior in sensing low-quality food
Source: eLife. 2024 Sep 5;13:RP94181. doi: 10.7554/eLife.94181 (PMC11377039; doi:10.7554/eLife.94181)
Supplement: Supplementary file 2. [file elife-94181-supp2.xlsx]

## Sheet: Supplementary File 2a
GO ID	Description	out (390)	All (6486)	pvalue	p.adjust	Genes
GO:0009607	response to biotic stimulus	39	140	1.04521e-16	2.12497e-14	WBGene00007097;WBGene00007440;WBGene00007682;WBGene00007807;WBGene00008234;WBGene00008492;WBGene00008988;WBGene00009430;WBGene00009433;WBGene00009971;WBGene00009973;WBGene00010019;WBGene00010050;WBGene00010123;WBGene00010124;WBGene00010127;WBGene00010128;WBGene00010659;WBGene00012783;WBGene00014252;WBGene00014698;WBGene00014700;WBGene00015455;WBGene00015932;WBGene00015933;WBGene00016379;WBGene000…
GO:0043207	response to external biotic stimulus	39	140	1.04521e-16	2.12497e-14	WBGene00007097;WBGene00007440;WBGene00007682;WBGene00007807;WBGene00008234;WBGene00008492;WBGene00008988;WBGene00009430;WBGene00009433;WBGene00009971;WBGene00009973;WBGene00010019;WBGene00010050;WBGene00010123;WBGene00010124;WBGene00010127;WBGene00010128;WBGene00010659;WBGene00012783;WBGene00014252;WBGene00014698;WBGene00014700;WBGene00015455;WBGene00015932;WBGene00015933;WBGene00016379;WBGene000…
GO:0051707	response to other organism	39	140	1.04521e-16	2.12497e-14	WBGene00007097;WBGene00007440;WBGene00007682;WBGene00007807;WBGene00008234;WBGene00008492;WBGene00008988;WBGene00009430;WBGene00009433;WBGene00009971;WBGene00009973;WBGene00010019;WBGene00010050;WBGene00010123;WBGene00010124;WBGene00010127;WBGene00010128;WBGene00010659;WBGene00012783;WBGene00014252;WBGene00014698;WBGene00014700;WBGene00015455;WBGene00015932;WBGene00015933;WBGene00016379;WBGene000…
GO:0098542	defense response to other organism	39	140	1.04521e-16	2.12497e-14	WBGene00007097;WBGene00007440;WBGene00007682;WBGene00007807;WBGene00008234;WBGene00008492;WBGene00008988;WBGene00009430;WBGene00009433;WBGene00009971;WBGene00009973;WBGene00010019;WBGene00010050;WBGene00010123;WBGene00010124;WBGene00010127;WBGene00010128;WBGene00010659;WBGene00012783;WBGene00014252;WBGene00014698;WBGene00014700;WBGene00015455;WBGene00015932;WBGene00015933;WBGene00016379;WBGene000…
GO:0044419	biological process involved in interspecies interaction between organisms	39	141	1.3673e-16	2.12497e-14	WBGene00007097;WBGene00007440;WBGene00007682;WBGene00007807;WBGene00008234;WBGene00008492;WBGene00008988;WBGene00009430;WBGene00009433;WBGene00009971;WBGene00009973;WBGene00010019;WBGene00010050;WBGene00010123;WBGene00010124;WBGene00010127;WBGene00010128;WBGene00010659;WBGene00012783;WBGene00014252;WBGene00014698;WBGene00014700;WBGene00015455;WBGene00015932;WBGene00015933;WBGene00016379;WBGene000…
GO:0002376	immune system process	39	142	1.78381e-16	2.12497e-14	WBGene00007097;WBGene00007440;WBGene00007682;WBGene00007807;WBGene00008234;WBGene00008492;WBGene00008988;WBGene00009430;WBGene00009433;WBGene00009971;WBGene00009973;WBGene00010019;WBGene00010050;WBGene00010123;WBGene00010124;WBGene00010127;WBGene00010128;WBGene00010659;WBGene00012783;WBGene00014252;WBGene00014698;WBGene00014700;WBGene00015455;WBGene00015932;WBGene00015933;WBGene00016379;WBGene000…
GO:0006952	defense response	39	142	1.78381e-16	2.12497e-14	WBGene00007097;WBGene00007440;WBGene00007682;WBGene00007807;WBGene00008234;WBGene00008492;WBGene00008988;WBGene00009430;WBGene00009433;WBGene00009971;WBGene00009973;WBGene00010019;WBGene00010050;WBGene00010123;WBGene00010124;WBGene00010127;WBGene00010128;WBGene00010659;WBGene00012783;WBGene00014252;WBGene00014698;WBGene00014700;WBGene00015455;WBGene00015932;WBGene00015933;WBGene00016379;WBGene000…
GO:0006955	immune response	39	142	1.78381e-16	2.12497e-14	WBGene00007097;WBGene00007440;WBGene00007682;WBGene00007807;WBGene00008234;WBGene00008492;WBGene00008988;WBGene00009430;WBGene00009433;WBGene00009971;WBGene00009973;WBGene00010019;WBGene00010050;WBGene00010123;WBGene00010124;WBGene00010127;WBGene00010128;WBGene00010659;WBGene00012783;WBGene00014252;WBGene00014698;WBGene00014700;WBGene00015455;WBGene00015932;WBGene00015933;WBGene00016379;WBGene000…
GO:0045087	innate immune response	34	122	1.05789e-14	1.12019e-12	WBGene00007440;WBGene00007682;WBGene00007807;WBGene00008234;WBGene00008492;WBGene00008988;WBGene00009430;WBGene00009433;WBGene00009971;WBGene00009973;WBGene00010019;WBGene00010050;WBGene00010123;WBGene00010127;WBGene00010128;WBGene00010659;WBGene00014252;WBGene00014698;WBGene00014700;WBGene00015455;WBGene00015932;WBGene00015933;WBGene00016379;WBGene00016599;WBGene00016769;WBGene00016788;WBGene000…
GO:0009605	response to external stimulus	40	183	3.11649e-13	2.97001e-11	WBGene00007097;WBGene00007440;WBGene00007682;WBGene00007807;WBGene00008234;WBGene00008492;WBGene00008988;WBGene00009430;WBGene00009433;WBGene00009971;WBGene00009973;WBGene00010019;WBGene00010050;WBGene00010123;WBGene00010124;WBGene00010127;WBGene00010128;WBGene00010659;WBGene00012138;WBGene00012783;WBGene00014252;WBGene00014698;WBGene00014700;WBGene00015455;WBGene00015932;WBGene00015933;WBGene000…
GO:0032787	monocarboxylic acid metabolic process	24	90	2.76226e-10	2.39312e-08	WBGene00001150;WBGene00001157;WBGene00001158;WBGene00001564;WBGene00007969;WBGene00008564;WBGene00008780;WBGene00009334;WBGene00009439;WBGene00009973;WBGene00012970;WBGene00013594;WBGene00014000;WBGene00014001;WBGene00014258;WBGene00015887;WBGene00017048;WBGene00017781;WBGene00019022;WBGene00019060;WBGene00019404;WBGene00021002;WBGene00021296;WBGene00022130
GO:0006950	response to stress	55	383	5.83907e-10	4.6372e-08	WBGene00000831;WBGene00001872;WBGene00003373;WBGene00003422;WBGene00007097;WBGene00007440;WBGene00007682;WBGene00007694;WBGene00007807;WBGene00008234;WBGene00008492;WBGene00008988;WBGene00009165;WBGene00009430;WBGene00009433;WBGene00009897;WBGene00009971;WBGene00009973;WBGene00010019;WBGene00010050;WBGene00010123;WBGene00010124;WBGene00010127;WBGene00010128;WBGene00010659;WBGene00011045;WBGene000…
GO:0006631	fatty acid metabolic process	18	61	8.57407e-09	6.28546e-07	WBGene00001150;WBGene00001157;WBGene00001158;WBGene00008564;WBGene00009439;WBGene00009973;WBGene00012970;WBGene00013594;WBGene00014000;WBGene00015887;WBGene00017048;WBGene00017781;WBGene00019022;WBGene00019060;WBGene00019404;WBGene00021002;WBGene00021296;WBGene00022130
GO:0009056	catabolic process	59	503	2.83103e-07	1.92713e-05	WBGene00000211;WBGene00000831;WBGene00001150;WBGene00003090;WBGene00003091;WBGene00003092;WBGene00003097;WBGene00003907;WBGene00004813;WBGene00004814;WBGene00004815;WBGene00004816;WBGene00004818;WBGene00004820;WBGene00004821;WBGene00007425;WBGene00008561;WBGene00008564;WBGene00008780;WBGene00008803;WBGene00009334;WBGene00009347;WBGene00009698;WBGene00009727;WBGene00009824;WBGene00009973;WBGene000…
GO:0072329	monocarboxylic acid catabolic process	12	35	4.45233e-07	2.82871e-05	WBGene00001150;WBGene00008564;WBGene00009334;WBGene00009973;WBGene00013594;WBGene00014000;WBGene00015887;WBGene00017048;WBGene00017781;WBGene00019022;WBGene00019060;WBGene00021296

## Sheet: Supplementary File 2b
UPRER target gene1						HK-OP50			OP50
Gene stable ID	Gene name	GO term accession		gene_id	gene_name	HK1	HK2	HK3	OP1	OP2	OP3	log2FoldChange	pvalue	padj	description
WBGene00002147	ire-1	GO:0006990		WBGene00000683	col-109	191.278	500.712	725.295	95.768	36.8638	80.9611	2.72914	5.85469e-08	4.11255e-06	IRE1-mediated UPR
WBGene00004804	skn-1	GO:0006990		WBGene00000033	abu-10	164.764	305.405	289.376	69.734	50.556	67.2776	2.01723	3.70108e-07	1.92756e-05	ER UPR
WBGene00006959	xbp-1	GO:0006990		WBGene00000031	abu-8	205.482	295.832	325.548	86.4701	77.9406	58.1552	1.89101	2.87785e-07	1.56207e-05	pharynx development
WBGene00000024	abu-1	GO:0030968		WBGene00017073	D2096.6	73.8599	99.5679	172.513	27.8936	35.8105	34.2089	1.8229	0.000306643	0.00522042	ER UPR
WBGene00000025	abu-2	GO:0030968		WBGene00000512	ckb-2	360.777	328.383	390.472	158.993	75.8341	148.239	1.49428	4.27294e-05	0.00107421	IRE1-mediated UPR
WBGene00000027	abu-4	GO:0030968		WBGene00015057	gad-3	790.68	865.475	643.676	352.389	290.697	271.391	1.32964	1.46471e-06	6.16802e-05	IRE1-mediated UPR
WBGene00000028	abu-5	GO:0030968		WBGene00002271	lec-8	1553.9	1826.69	1723.27	842.387	783.619	1006.88	0.955168	7.77744e-05	0.00175233	response to toxic
WBGene00000029	abu-6	GO:0030968		WBGene00008132	gale-1	3110.64	3615.08	3685.84	2068.77	1999.07	1426.51	0.921965	0.000271807	0.00476318	ER UPR
WBGene00000030	abu-7	GO:0030968		WBGene00002008	hsp-4	6216.54	6407.77	4926.81	3758.2	2829.03	2697.94	0.918429	0.000290852	0.00499995	ER UPR
WBGene00000031	abu-8	GO:0030968		WBGene00001099	dsc-4	2997.95	3254.15	2711.05	1783.33	2042.25	1026.27	0.885261	0.00329846	0.032023	IRE1-mediated UPR
WBGene00000032	abu-9	GO:0030968		WBGene00010470	cdr-4	1425.12	1209.18	1338.36	866.561	719.37	717.247	0.786167	0.00112792	0.0143723	IRE1-mediated UPR
WBGene00000033	abu-10	GO:0030968
WBGene00000034	abu-11	GO:0030968
WBGene00000190	arf-1.1	GO:0030968
WBGene00000222	atf-6	GO:0030968
WBGene00000266	bre-1	GO:0030968
WBGene00000512	ckb-2	GO:0030968
WBGene00000567	cnx-1	GO:0030968
WBGene00000683	col-109	GO:0030968
WBGene00000802	crt-1	GO:0030968
WBGene00000843	cup-2	GO:0030968
WBGene00001025	dnj-7	GO:0030968
WBGene00001099	dsc-4	GO:0030968
WBGene00002007	hsp-3	GO:0030968
WBGene00002008	hsp-4	GO:0030968
WBGene00002015	hsp-16.1	GO:0030968
WBGene00002017	hsp-16.11	GO:0030968
WBGene00002018	hsp-16.41	GO:0030968
WBGene00002019	hsp-16.48	GO:0030968
WBGene00002020	hsp-16.49	GO:0030968
WBGene00002026	hsp-70	GO:0030968
WBGene00002271	lec-8	GO:0030968
WBGene00003963	pdi-2	GO:0030968
WBGene00003970	pek-1	GO:0030968
WBGene00004099	abu-15	GO:0030968
WBGene00004141	pqn-57	GO:0030968
WBGene00004156	pqn-74	GO:0030968
WBGene00004736	sca-1	GO:0030968
WBGene00005648	srp-7	GO:0030968
WBGene00007626	rnf-121	GO:0030968
WBGene00009112	tag-353	GO:0030968
WBGene00009164	hrdl-1	GO:0030968
WBGene00009178	uggt-2	GO:0030968
WBGene00010337	serp-1.1	GO:0030968
WBGene00010470	cdr-4	GO:0030968
WBGene00011535	T06E4.8	GO:0030968
WBGene00011771	T14G8.3	GO:0030968
WBGene00012757	Y41C4A.11	GO:0030968
WBGene00015057	gad-3	GO:0030968
WBGene00015168	pdi-6	GO:0030968
WBGene00015752	C14B9.2	GO:0030968
WBGene00017073	D2096.6	GO:0030968
WBGene00017244	apy-1	GO:0030968
WBGene00018259	F41B4.3	GO:0030968
WBGene00018292	F41E6.11	GO:0030968
WBGene00018604	uggt-1	GO:0030968
WBGene00018737	F53B1.4	GO:0030968
WBGene00020109	R151.6	GO:0030968
WBGene00020374	serp-1.2	GO:0030968
WBGene00003877	pept-1	GO:1900101
WBGene00006411	octr-1	GO:1900101
WBGene00008132	gale-1	GO:1900102
1: UPRER target genes from GO term（1-positive regulation of transcription from RNA polymerase II promoter involved in unfolded protein response: GO:0006990; 2-endoplasmic reticulum unfolded protein response: GO:0030968; 3-regulation of endoplasmic reticulum unfolded protein response: GO:1900101; 4-negative regulation of endoplasmic reticulum unfolded protein response: GO:1900102. (https://parasit…

## Sheet: Supplementary File 2c
upregulated gene by PA (PA_N2_24H)				upregulated gene by Bacillus thuringiensis			upregulated gene by Staphylococcus aureus			upregulated gene by Serratia marcescens
Gene ID	Fold Change	Cuffdiff Qvalue		Gene ID	log2FC_Bthu	pval_Bthu	Gene ID	log2FC_Saur	pval_Saur	Gene ID	log2FC_Smar	pval_Smar
spe-42	0.863756	1		sodh-1	5.98729	0.00708669	tts-1	4.63639	0.00202849	F45D3.4	4.61273	0.000254662
F26A1.4	0.936092	1		ech-9	5.6839	0.00637749	F45D3.4	4.60524	0.00144798	clec-4	4.37667	0.000812309
D1086.5	0.990163	0.0192442		cpr-1	5.39634	0.00587452	ech-9	4.14759	0.0288846	tts-1	4.33818	0.00203535
bath-46	1.67603	0.0364695		F45D3.4	5.34412	0.00587452	F48C1.9	3.68541	0.0265609	cnc-4	4.32253	0.000284206
ZK896.5	10.3693	0.621456		scl-2	5.2197	0.00587452	cnc-4	3.61071	0.0795543	C50F7.5	4.31919	0.000284206
T27A3.8	1.75324	0.19305		T28H10.3	5.18994	0.00587452	dct-7	3.51432	0.106331	ech-9	4.23084	0.00203511
dhhc-5	0.98811	0.462614		gei-7	5.06575	0.0061176	C50F7.5	3.4675	0.0707207	T24C4.4	4.18049	0.00106861
K06A9.2	1.12481	0.0145946		tts-1	4.77532	0.0206612	scl-2	3.44304	0.00202849	tsp-1	3.88222	0.000341114
T22F3.10	1.08016	0.0595778		T12D8.5	4.74649	0.00574348	cyp-37B1	3.42406	0.0542948	dct-7	3.882	0.000835458
magu-2	1.03018	0.135365		fmo-2	4.659	0.0185994	spp-2	3.41424	0.000304157	cpt-3	3.82459	0.000263834
C47E12.11	0.848571	1		C50F7.5	4.41344	0.00763301	nlp-34	3.38725	0.0593682	B0024.4	3.81096	0.000284206
F25B3.4	0.99987	0.470883		F53A9.8	4.33876	0.00587452	dct-8	3.32602	0.105709	cyp-37B1	3.69722	0.000470623
nhr-231	1.43456	0.0246977		C08F11.13	4.31265	0.0064623	sodh-1	3.15671	0.0153558	ZK896.4	3.64477	0.000263834
snf-4	1.15793	1		cyp-37B1	4.26763	0.00606484	F53A9.8	3.09063	0.0144059	C08F11.13	3.64335	0.00239766
R13H9.6	0.553287	1		C06B3.6	4.04551	0.00761416	C48B4.1	3.07287	0.00418824	oac-20	3.54222	0.00134381
ptr-3	0.889791	0.0361702		clec-70	4.02016	0.0141011	T20B3.1	2.97985	0.0423551	F59C6.16	3.48018	0.000898791
C38C6.5	2.31229	1		asp-6	3.95939	0.00587452	lipl-1	2.97317	0.006973	srr-6	3.45113	0.000396804
Y110A2AL.3	0.802839	0.0880247		thn-2	3.95782	0.00574348	clec-70	2.92351	0.0143656	F53B2.8	3.45053	0.00046851
T01D3.3	0.594939	0.160295		F21F8.4	3.94785	0.0348271	ugt-18	2.86698	0.0889622	nlp-34	3.40018	0.00060418
T22F3.11	0.619835	0.268265		spp-2	3.94268	0.00643863	C18D11.6	2.78312	0.0229082	F48C1.9	3.39703	0.0285979
F36D1.7	1.10742	0.0209846		lys-4	3.88411	0.00587452	T26H5.9	2.77784	0.00801784	sodh-1	3.38778	0.00203848
R05H10.1	0.822178	0.0200871		F43C11.7	3.83564	0.0100088	F42A10.7	2.70997	0.00049081	K11H12.4	3.38651	0.000532712
F59E11.7	0.811244	0.217594		lipl-2	3.77828	0.00587452	Y53F4B.45	2.70013	0.0091822	F53A9.8	3.3613	0.000374671
cyp-13A11	0.780459	1		W07B8.4	3.77578	0.00643131	M60.2	2.68877	0.0328465	scl-2	3.32861	0.000254662
osta-1	0.86694	0.211744		thn-1	3.7572	0.00587452	gei-7	2.662	0.0592401	W09G12.7	3.3178	0.00136804
hil-1	1.09196	0.00366533		M60.2	3.73022	0.00587452	nlp-25	2.65836	0.0500481	F48C1.11	3.30922	0.00397799
coel-1	0.80839	0.00815658		lys-5	3.71285	0.00587452	nlp-30	2.65651	0.131312	F53A9.6	3.2737	0.000254662
fbxa-218	0.506914	1		cpr-4	3.69776	0.0109487	F15E6.3	2.65195	0.0994676	T28H10.3	3.2623	0.00043974
mrpr-1	0.734912	0.705342		acs-2	3.69407	0.00587452	ilys-3	2.62685	0.0615764	T24E12.5	3.21068	0.000331321
C42D4.13	1.17241	0.0135284		C48B4.1	3.66429	0.00809726	Y43C5A.3	2.61779	0.0287301	dct-8	3.18137	0.000946662
C33D9.5	0.761125	0.0244103		F01G10.11	3.65408	0.00753611	spp-6	2.60517	0.351163	F33H12.7	3.16182	0.00108236
F09F3.8	1.13528	0.132357		T20B3.1	3.64098	0.00912225	F58E10.7	2.6029	0.0968933	C18D11.6	3.15123	0.00207624
F47H4.12	1.51581	0.0215755		ZK896.5	3.5054	0.114186	cyp-32B1	2.54657	0.0144059	nlp-30	3.13859	0.00195948
Y34F4.4	1.17292	0.0189436		cpr-3	3.45803	0.0566779	C34C6.7	2.54371	0.0574489	nlp-25	3.13626	0.000377213
C02G6.2	0.777149	1		F40F12.7	3.45473	0.00587452	nlp-31	2.54211	0.0980554	F10D7.3	3.10256	0.00147082
Y43F8B.23	2.79326	0.00728876		T26H5.9	3.43753	0.00934789	lipl-3	2.53741	0.0460661	trx-3	3.03872	0.00139972
R05D7.2	0.598763	0.618491		ZK550.6	3.42347	0.00587452	F21F8.4	2.51644	0.0014345	spp-20	3.03872	0.00187432
F47B8.2	0.507594	0.178487		C34C6.7	3.40231	0.00574348	C08F11.13	2.50442	0.0615764	C34C6.7	3.01109	0.00105606
ttm-1	1.04974	0.0353685		W09G12.7	3.40048	0.054438	Y41G9A.10	2.48047	0.0727087	F53A9.1	3.00496	0.00169615
btb-21	0.933132	0.0610866		lipl-1	3.33695	0.0073524	cpr-4	2.47988	0.0018531	glc-1	3.00274	0.000869291
K07F5.6	0.560226	1		F59C6.16	3.32831	0.00587452	nlp-29	2.44015	0.117239	clec-67	2.99655	0.00546969
Y37H2C.1	1.53828	0.0180251		Y53F4B.45	3.32293	0.0142671	F43C11.7	2.4126	0.0366312	C49C3.9	2.98762	0.000609097
srp-10	9.30059	1		T28F4.5	3.28303	0.00587452	F10D7.3	2.40869	0.0964683	C10C5.2	2.97686	0.000283035
srp-9	7.67238	1		C42D4.1	3.27168	0.00587452	lipl-2	2.39354	0.05314	tsp-2	2.96347	0.000283035
Y37D8A.16	0.928905	0.000947178		T12G3.1	3.2603	0.00599954	C06B3.6	2.38044	0.143568	dod-22	2.9626	0.00276989
C10C5.5	0.564311	0.458241		Y22D7AL.15	3.24511	0.00587452	ftn-1	2.34255	0.00248081	F13A7.11	2.94026	0.0017308
F59C6.18	0.500469	1		lea-1	3.22751	0.00602524	F01G10.11	2.3388	0.104779	irg-2	2.9312	0.000833365
C36C5.12	0.641456	0.325808		Y58A7A.3	3.2091	0.0577401	cnc-2	2.33667	0.143606	cyp-13A5	2.92624	0.000833365
C36C5.15	0.632959	1		pqm-1	3.19981	0.00877768	T28H10.3	2.32656	0.0498589	Y58A7A.3	2.92473	0.000263834
F55C9.6	9.82176	1		F42A10.7	3.196	0.0259135	acs-17	2.32438	0.0542948	F14F9.3	2.9156	0.000263834
Y38F1A.7	0.775218	0.611059		F21C10.10	3.14507	0.00587452	ZC443.3	2.31382	0.0580005	cpr-3	2.90712	0.000283035
F44D12.11	2.00993	0.126449		nlp-28	3.11602	0.00744351	W07B8.4	2.27636	0.00030138	nlp-31	2.89212	0.00130624
Y82E9BR.23	0.838322	0.0982762		lec-11	3.10806	0.0225272	cnc-6	2.27199	0.114806	K11H12.3	2.87898	0.000780873
R13H4.5	0.69739	0.041285		M02H5.8	3.10579	0.0533403	clec-172	2.24361	0.0843492	fmo-2	2.8727	0.00360529
W06F12.3	0.733874	0.304883		ctl-2	3.10462	0.00587452	nas-9	2.19553	0.095648	ZK896.5	2.87088	0.000448335
T09E11.11	0.890857	0.108031		cpt-3	3.10059	0.0059596	F48C1.11	2.1785	0.139327	F35E12.9	2.86587	0.00172049
fozi-1	1.24568	0.000947178		F15E6.3	3.09091	0.00944758	F11E6.11	2.17666	0.0783115	W02A2.9	2.84245	0.00215683
ZK1290.13	0.73424	0.0536549		clec-66	3.08148	0.0184118	F59C6.16	2.15629	0.0313363	ins-7	2.83842	0.00158327
clec-64	0.72605	0.118997		C49C3.9	3.07614	0.0423784	rncs-1	2.15251	0.00547325	ttr-23	2.82865	0.000284206
fbxa-183	3.49484	1		fat-3	3.05026	0.00574348	thn-2	2.1261	0.000295567	dod-3	2.82428	0.00216674
Y37F4.5	1.27164	1		F08B12.4	3.04843	0.00615973	spp-8	2.12158	0.0230306	F53A9.2	2.82136	0.000840811
K01A2.10	0.977833	0.00424549		T24C4.4	3.0044	0.218827	T23E7.6	2.11383	0.0727087	T01D3.6	2.81808	0.000313513
C30E1.8	1.77189	1		T16G1.7	2.99532	0.0229037	F54F3.4	2.09689	0.0189749	nlp-29	2.80807	0.00136936
srz-100	1.97907	0.119081		C32F10.4	2.99256	0.00625751	F53B2.8	2.08464	0.0990332	valv-1	2.80188	0.000511782
R102.7	0.553956	1		T01D3.6	2.98522	0.0295984	ZK970.7	2.07016	0.158509	C06B3.6	2.79844	0.0017138
fbxc-23	1.48194	0.00856701		F53A9.6	2.98215	0.0227358	clec-60	2.05217	0.0673886	lys-3	2.79817	0.0211788
F28A10.1	1.09753	1		clec-62	2.97754	0.00587452	Y65B4BR.1	2.04988	0.0624705	M02H5.8	2.76431	0.000541616
F28A10.4	9.25958	1		dhs-18	2.96768	0.00797308	thn-1	2.04566	0.000209587	F53F1.6	2.73065	0.00239388
F46A8.7	0.892955	0.0306641		Y43C5A.3	2.96358	0.00625765	F16B4.7	2.04199	0.130755	ifp-1	2.72557	0.00105464
F46A8.6	1.49693	1		F17C11.11	2.95418	0.0566545	F16C3.2	2.01991	0.0766633	ZC443.3	2.7251	0.000254662
F46A8.9	0.626555	1		cpg-7	2.94893	0.00587452	ora-1	2.01327	0.105757	C27D9.2	2.71419	0.000263834
K09C6.1	0.863643	1		oac-20	2.92337	0.0321341	cpr-1	1.99424	0.0545806	clec-69	2.67839	0.0037768
D2024.1	0.923942	1		cpr-5	2.89184	0.00587452	ins-7	1.98477	0.0229082	Y102A11A.2	2.67754	0.00269128
srt-22	0.861572	1		T16G1.4	2.88406	0.00588109	F36F2.2	1.98261	0.0771477	T16G1.6	2.67414	0.000254662
Y46H3D.1	0.793942	1		F46C5.1	2.88335	0.00770906	D2045.8	1.96858	0.0691789	pho-6	2.6683	0.00195948
F56D5.6	1.64734	0.000947178		faah-2	2.87826	0.0592246	F49C12.7	1.95516	0.00740059	C18H7.11	2.6648	0.00109723
F46C5.1	1.19024	0.0244103		F53A9.1	2.86989	0.0283536	cpg-7	1.93979	0.21597	T26H5.9	2.65167	0.000707025
cyp-33C8	0.910999	0.0089721		rncs-1	2.84882	0.0104611	T05E12.3	1.93666	0.0143656	K10D11.5	2.63918	0.00178438
R10E8.8	1.56073	0.00582928		F49C12.7	2.84232	0.0216266	F25E2.3	1.92781	0.0739672	T27F2.4	2.62944	0.000833643
srw-86	3.10877	0.000947178		F54F3.4	2.83333	0.00574348	ZK550.6	1.91941	0.0103219	far-7	2.61283	0.00163535
EGAP1.1	2.09315	0.127495		K03H1.10	2.82524	0.00587452	Y43F8B.9	1.91389	0.0377871	K10D11.2	2.61035	0.00199621
nlp-8	0.564217	0.0982094		clec-63	2.81767	0.00587452	F55H12.2	1.90543	0.0889622	C25H3.10	2.60929	0.000352063
elo-7	11.3256	1		spp-8	2.80107	0.005971	C33C12.3	1.8993	0.0485357	Y22D7AL.15	2.60816	0.000707025
T08G3.7	1.09751	1		C27A7.8	2.79442	0.00574348	F40B5.1	1.89062	0.0559502	Y43C5A.3	2.60458	0.000353785
T05B11.1	0.594836	0.0735682		lipl-3	2.77863	0.00625113	F21A3.2	1.88576	0.0946802	C07E3.3	2.58901	0.00106861
Y52D5A.1	0.50771	1		ugt-44	2.77322	0.0085388	Y48A6B.7	1.88074	0.0023334	Y37H2A.14	2.58739	0.00105606
C30B5.6	0.828459	0.25085		F21A3.2	2.77171	0.0101288	ZC395.5	1.87961	0.0466644	F14F9.4	2.58616	0.00131203
M60.7	0.922227	0.100464		M60.4	2.7672	0.00574348	lys-7	1.87779	0.218457	C06E4.8	2.58469	0.000717123
F49H6.13	7.02895	0.0783674		ugt-18	2.76635	0.00587452	cpt-3	1.87395	0.0852931	nhr-112	2.58224	0.000263834
ZC443.4	0.742717	0.0312028		F53B2.8	2.75132	0.0988894	dhs-18	1.86102	0.0368725	gpa-17	2.56784	0.00132098
K08D9.4	0.891399	0.156192		C35C5.8	2.73548	0.00682243	R05G6.10	1.85613	0.103593	cyp-13A4	2.51266	0.00105606
C44F1.1	0.802592	0.0306641		far-7	2.71272	0.00613261	C15A11.7	1.85148	0.0247509	F11E6.11	2.51089	0.00123255
C17B7.10	0.845578	1		R02D5.3	2.70624	0.0445738	C32F10.4	1.84628	0.00744476	cpt-4	2.50388	0.000341114
srg-34	0.780571	0.311162		ZC443.3	2.69374	0.00587452	F17C11.4	1.83871	0.0498589	K05B2.4	2.50131	0.0018156
F08H9.3	2.08167	0.0608956		spp-1	2.68828	0.00744217	ZK669.3	1.81843	0.0920538	C49G7.3	2.49988	0.00268894
ZK783.6	9.64838	1		W02A2.9	2.66997	0.0263147	C18A11.1	1.81509	0.12217	Y41G9A.10	2.49938	0.000661662
Y105C5B.7	0.908436	1		F17C11.4	2.66892	0.00587452	Y54G2A.11	1.80505	0.0432961	oac-31	2.49321	0.0028446
nhr-206	0.694463	0.265604		F40F8.5	2.6623	0.00650764	C27B7.9	1.80418	0.16617	ZC395.5	2.48337	0.0023025
Y46G5A.36	1.25435	0.217903		F25E5.8	2.65209	0.00772688	ZK673.1	1.79815	0.00195596	C37C3.10	2.48165	0.000527331
sma-1	1.13201	0.0538999		tsp-1	2.64779	0.159477	C40H1.7	1.78707	0.010327	T19D12.4	2.46322	0.000263834
T15H9.5	0.639413	1		acs-17	2.62718	0.0149465	T16G1.4	1.7846	0.0774278	abf-5	2.45286	0.000387773
T26H5.4	14.6371	0.283572		lec-8	2.6224	0.0104405	dod-3	1.78241	0.0219654	clec-41	2.45156	0.00177356
math-39	0.613898	0.181925		tth-1	2.61409	0.00973036	F55A12.6	1.78207	0.075557	Y58A7A.4	2.44419	0.00228308
C28C12.4	1.19963	0.0142218		asp-3	2.61242	0.00574348	F18G5.6	1.78012	0.0758709	Y46G5A.20	2.43787	0.000490838
B0348.1	11.225	1		zip-2	2.6124	0.00671342	T04F8.7	1.77254	0.058171	C18A11.1	2.43238	0.00181326
T05C12.9	2.05419	1		asp-5	2.60146	0.005971	lbp-7	1.764	0.0586706	cpg-7	2.42653	0.00287688
T06G6.8	1.40394	1		nlp-25	2.59516	0.00919544	ctl-2	1.75349	0.0298076	Y47H10A.5	2.41995	0.00100694
Y38H6C.24	1.86901	0.211883		Y51A2D.13	2.58904	0.00587452	Y22D7AL.15	1.74659	0.0423551	rncs-1	2.41675	0.000263834
ttr-4	10.0871	1		asm-2	2.57836	0.00608058	pqm-1	1.74153	0.00475592	F15E6.3	2.38391	0.00158224
C10G11.1	9.96329	1		lact-2	2.57587	0.0194732	K02D7.1	1.71569	0.0531988	F35E12.4	2.37984	0.000284206
Y9C9A.1	0.668266	0.513578		ttr-17	2.56814	0.00587452	nlp-28	1.71	0.0157927	F16C3.2	2.37696	0.00714156
K12B6.2	1.04383	1		lgg-1	2.565	0.00587452	pgp-11	1.69129	0.0629188	tre-5	2.37413	0.00270009
bath-47	0.880873	0.0301873		W01F3.2	2.56234	0.00692672	F58A6.1	1.69064	0.055908	ugt-31	2.36018	0.00114736
egl-15	0.654535	0.215911		cyp-32B1	2.56072	0.0220182	dos-1	1.68433	0.0701975	T20B3.1	2.34489	0.00275375
pitr-4	1.42169	0.104539		W05H9.1	2.5543	0.0139819	C10C5.3	1.6807	0.0479807	C27B7.9	2.34403	0.00194429
msp-42	1.04815	1		pho-9	2.55311	0.0319592	asp-6	1.67205	0.00413255	T19C4.5	2.33846	0.00043974
poml-4	0.686475	0.24358		ttr-45	2.55166	0.00599954	R09D1.11	1.67099	0.0690802	R10E8.8	2.32889	0.00197855
Y116A8A.6	0.672215	1		F40B5.1	2.54311	0.00587452	T12D8.5	1.67098	0.232271	C25F9.11	2.31275	0.00102843
Y116A8A.4	2.01303	1		F56D5.6	2.5373	0.00800196	C25H3.10	1.6663	0.0229082	phat-3	2.30242	0.00195948
math-24	1.32947	0.000947178		ZC395.5	2.51859	0.0196268	nlt-1	1.66586	0.0432311	C31B8.4	2.30241	0.00226788
ZK896.1	0.716978	0.397225		F54C9.3	2.51792	0.00587452	pmt-1	1.66233	0.00324055	ZK596.1	2.29362	0.00354978
T16H12.9	0.570588	0.251279		spp-18	2.49292	0.00587452	ttr-30	1.66147	0.138072	mtl-1	2.29294	0.00032763
C31B8.4	1.71577	0.0670855		C31H5.6	2.48889	0.00795299	twk-29	1.6509	0.0870789	F16B4.7	2.28389	0.00216674
R10H1.1	0.676409	0.0718021		asah-1	2.48467	0.00599954	fat-3	1.63896	0.0272639	T22B7.3	2.27656	0.0124869
ZK930.2	0.524848	0.16736		K09D9.1	2.48177	0.2856	hmit-1.3	1.6264	0.0479807	faah-2	2.26974	0.00269866
ZK930.5	0.849115	0.448057		F08F1.4	2.47529	0.00587452	nhr-99	1.6205	0.0634312	cyp-13B1	2.26941	0.00546943
spe-38	0.592504	1		H40L08.2	2.47493	0.00587452	glc-1	1.61952	0.03552	ZK669.3	2.25999	0.0018755
T04C12.7	0.971747	0.0789069		F53F1.6	2.47295	0.0137226	C14A6.2	1.61723	0.0549208	F35E12.8	2.25765	0.000377213
K03H1.5	0.583688	0.0811194		K02D7.1	2.4683	0.0062069	F33H12.7	1.61011	0.223843	C16D9.4	2.23951	0.00133618
F35E12.9	2.55981	0.00366533		F59B1.2	2.45796	0.00749508	M162.5	1.60006	0.0616793	Y43F8B.9	2.23465	0.000597011
F35H8.1	1.7205	0.360108		Y37D8A.16	2.44086	0.005971	C06H5.7	1.5876	0.0889686	hsp-16.2	2.22811	0.00295152
D2063.1	0.844424	0.0286664		T04A6.1	2.43712	0.00587452	lys-4	1.58758	0.0318855	F56D2.5	2.22503	0.00160298
best-24	0.647245	0.0634258		asp-1	2.43504	0.00615973	clec-146	1.58454	0.0804061	oac-6	2.21804	0.00374014
ikb-1	0.506292	0.181084		T22B7.3	2.43476	0.00971514	msp-76	1.58296	0.0634312	F55H12.2	2.21411	0.00123255
F49H6.5	1.98633	0.0934853		Y48A6B.7	2.43382	0.0241189	hil-1	1.58233	0.0688199	ttr-21	2.2126	0.00162144
F25E5.4	1.10069	0.00934658		F55H12.2	2.42678	0.0061176	C34F11.8	1.58109	0.0288846	acs-17	2.21236	0.0043788
fbxa-201	0.714477	1		C25H3.10	2.42422	0.00589707	acs-14	1.58074	0.0132092	C15A11.7	2.20696	0.000374671
C25F6.8	1.73756	1		ZK896.4	2.41782	0.225568	fip-5	1.5738	0.120231	R02D5.3	2.20628	0.00183644
C18H7.1	0.766958	0.0089721		dod-22	2.41378	0.00883554	acs-22	1.56278	0.0396501	C17H12.8	2.19443	0.00219453
C23H4.6	1.60283	0.000947178		C14B1.3	2.40124	0.00814706	lys-5	1.55339	0.00434295	fbxa-14	2.19112	0.00454891
fbxa-219	1.15333	0.00480729		brp-1	2.39557	0.00587452	T28A11.19	1.55295	0.0520547	K09D9.1	2.18624	0.00222657
ZK550.7	0.506881	1		F58F9.7	2.39312	0.00788951	far-7	1.55242	0.0535021	T04F8.7	2.18191	0.00296135
F40E3.5	1.31139	0.495948		mtl-1	2.37769	0.0674956	cpt-4	1.5396	0.014431	ptr-8	2.18165	0.00279239
abt-3	8.87517	1		B0272.4	2.37231	0.0215511	F56D6.8	1.53429	0.133461	C14A6.2	2.16412	0.0104724
R08B4.5	0.713824	0.307267		K11H12.4	2.36604	0.237969	clec-62	1.52385	0.00896082	fbxa-128	2.16345	0.00225654
F44D12.8	3.15385	1		oac-14	2.3649	0.103529	F55H12.4	1.51554	0.13583	ZK970.7	2.15823	0.00206107
C27B7.7	0.738756	0.049293		str-176	2.35544	0.0205062	T19C4.5	1.51002	0.0893319	his-11	2.15493	0.00211195
T09F5.12	1.02461	0.0389258		ftn-1	2.35541	0.00587452	D1086.5	1.49978	0.0417264	nhr-63	2.1499	0.000835458
F58D5.8	1.54906	1		F33H12.7	2.35491	0.290652	clec-63	1.49568	0.0128677	tag-234	2.14782	0.000284206
grd-17	1.84696	0.1343		clec-4	2.35368	0.232057	K09C4.1	1.49082	0.065537	T05E12.3	2.14298	0.00242545
F42C5.4	1.29216	0.000947178		lys-3	2.34395	0.268505	math-38	1.49069	0.10019	nas-9	2.14171	0.00100694
clec-35	0.910138	0.432129		irg-2	2.33881	0.269478	cyp-34A9	1.4771	0.0781073	pho-9	2.14029	0.00279239
F07E5.8	0.522547	1		C53B7.3	2.33672	0.00587452	K02C4.5	1.47349	0.140347	fbxa-91	2.13312	0.000898791
cng-1	0.586504	0.252314		R04B5.5	2.33604	0.00943194	F58F9.7	1.47084	0.0376988	F35B12.3	2.13122	0.00228493
oac-50	0.582467	1		F13A7.11	2.3321	0.33105	T28F4.5	1.46904	0.0465488	M60.2	2.1282	0.00204779
thn-5	0.596664	1		nlp-29	2.31761	0.0104255	clec-251	1.46429	0.675999	Y46D2A.5	2.12818	0.0118648
C17B7.4	0.806941	0.419382		Y43F8B.2	2.30227	0.005971	Y51A2D.13	1.46378	0.0423107	T24C4.8	2.11768	0.000391518
F26E4.7	0.80678	0.0145946		skr-3	2.3003	0.00741743	fipr-22	1.46081	0.112018	irg-1	2.11759	0.00212849
C38C3.7	1.67915	1		C40H1.7	2.29498	0.0527224	cnc-11	1.45999	0.143331	T16G1.4	2.11696	0.00816278
Y51B9A.7	1.54046	1		H06I04.6	2.29434	0.005971	C50F4.8	1.45112	0.0632256	C35C5.8	2.11396	0.000566382
K11H12.10	1.6304	1		ctl-1	2.29049	0.0117781	C30G4.7	1.44899	0.0593682	pqn-75	2.10935	0.00220343
F52B11.5	0.647947	0.201154		lys-8	2.29026	0.00587452	H40L08.2	1.44674	0.0726536	C34F11.8	2.09849	0.00227682
F10D7.3	1.59295	0.000947178		crm-1	2.28875	0.00676177	tps-1	1.44293	0.102404	cyp-32B1	2.09517	0.000967374
F15A8.6	0.682642	0.0482009		nas-9	2.28078	0.0160507	cnc-7	1.44288	0.282466	F21A3.2	2.08312	0.00179091
Y17G9A.4	0.521359	0.332859		F36F2.2	2.27864	0.0192609	C10G11.9	1.44222	0.0272639	lec-11	2.08276	0.00243327
Y43F8B.15	2.92364	0.0765839		tag-196	2.27238	0.00587452	srr-4	1.43957	0.0870083	T24B8.5	2.0827	0.00184911
B0457.3	0.698648	1		Y34F4.5	2.26213	0.00626832	T16G1.7	1.43689	0.0727087	ugt-18	2.08259	0.00268894
R02F11.2	1.11965	0.0177322		Y71F9B.9	2.26183	0.0340555	W09D12.1	1.43204	0.0592603	T12G3.1	2.07881	0.00228493
T28A11.19	1.1199	0.0819623		F41E6.5	2.26164	0.00868084	F31F7.1	1.43071	0.0114167	F40B5.1	2.07347	0.000284206
T28A11.5	11.0527	1		F19C7.2	2.26012	0.00587452	tag-196	1.43063	0.0348718	Y53F4B.45	2.07333	0.000627985
H39E23.2	12.3318	1		ttr-51	2.25883	0.00587452	F53A9.7	1.42821	0.116816	oac-14	2.07019	0.0116744
F01D4.8	1.4242	0.0180251		unc-64	2.25081	0.00587452	F40F12.7	1.42418	0.0267504	F39E9.22	2.06556	0.00359765
gem-4	1.57939	0.00728876		clec-65	2.24802	0.00574348	msp-42	1.40441	0.028803	ttr-37	2.06206	0.00973709
K09B11.5	10.0664	1		F19C7.4	2.24749	0.00708669	prx-11	1.40105	0.0147601	twk-29	2.04958	0.00705521
ins-11	6.17151	0.513578		Y39B6A.1	2.24687	0.0207639	T12G3.1	1.39518	0.0727087	pgp-5	2.04217	0.0058451
F35E2.3	1.22189	1		F10D7.3	2.24577	0.00626832	zip-2	1.39187	0.0166983	F53A9.7	2.03317	0.026032
clec-45	4.94695	0.0852361		fat-4	2.24332	0.00616277	C08G9.1	1.38792	0.0459023	T12D8.5	2.03092	0.00229635
C25H3.1	1.72605	0.0192442		skr-4	2.23556	0.00587452	T20D4.11	1.38216	0.0468721	M162.5	2.02843	0.000615151
R09E10.4	1.32093	1		R11F4.1	2.23522	0.00681775	msp-81	1.38098	0.0388484	F58E10.7	2.02643	0.00752679
prx-11	0.539727	0.142629		C50B6.7	2.23131	0.0126979	acr-20	1.38045	0.669371	cyp-34A9	2.02432	0.0028446
nhr-151	1.01428	0.0351158		ZK930.2	2.22582	0.00625751	Y48G8AL.13	1.36497	0.0542948	clec-66	2.02026	0.000575344
M28.4	0.816287	1		K02A11.3	2.21542	0.00587452	msp-78	1.36445	0.0265349	ZK1290.10	2.01815	0.00215327
zip-2	0.725913	0.0089721		K06A4.7	2.21344	0.005971	fmo-2	1.36373	0.122186	ttr-26	2.01777	0.00081542
T25B9.2	1.67463	1		C41G11.1	2.21331	0.00587452	ZK218.11	1.36106	0.247232	lipl-1	2.01654	0.00269128
T20D4.12	1.53177	1		Y49E10.16	2.21258	0.00587452	ttr-17	1.35999	0.0218029	ugt-54	2.01513	0.00290227
D1081.3	0.602523	1		T21H3.1	2.20971	0.00587452	C37A5.3	1.35524	0.27582	T09F5.12	2.01112	0.00135396
D1086.2	1.58846	0.157524		pmt-1	2.20716	0.00717739	K03H1.10	1.35153	0.0482779	scl-5	2.00991	0.00213509
T20B6.2	1.33876	1		C06G3.5	2.20645	0.0135496	W09G12.7	1.34931	0.429018	C50F4.8	2.00983	0.00245334
C15H7.2	1.36227	1		F57F5.1	2.20626	0.00708669	nhr-117	1.3487	0.0865031	C41G7.8	2.00544	0.0018593
K03A11.5	0.769617	0.0406324		acs-22	2.20484	0.0139568	C04G2.8	1.34537	0.0757618	fbxa-60	2.00458	0.00226788
Y22D7AR.12	0.77088	1		T28A11.19	2.20317	0.00749285	R10E8.8	1.34364	0.158712	Y37D8A.16	2.0043	0.00259852
K12C11.5	1.21437	1		F43G6.8	2.20229	0.0126415	T12A7.6	1.33716	0.0628006	T23E7.6	1.99901	0.000835458
T23F2.4	0.587386	0.368555		dhs-14	2.1862	0.0310895	Y49E10.18	1.33697	0.0251328	gei-7	1.99879	0.00125513
ins-20	1.6948	0.266131		clc-1	2.18603	0.050191	gbh-2	1.33574	0.078435	nhr-50	1.99686	0.00147514
Y43F8B.9	1.2445	0.003081		ZK1055.7	2.18481	0.0566845	C50B6.7	1.33569	0.100266	tat-2	1.96342	0.00211914
nhr-62	1.03069	0.00242805		F09F7.7	2.18411	0.00630909	B0272.4	1.33498	0.0950098	glt-5	1.95984	0.0018593
C05B5.17	11.7418	1		Y43F8B.9	2.18346	0.0176023	ikb-1	1.32831	0.154902	F10E9.12	1.95708	0.000910572
ttr-29	1.03007	0.0961216		C02F5.7	2.18039	0.00671613	cnc-8	1.32814	0.205702	cyp-33C8	1.95376	0.0033442
F53H2.1	1.17724	1		clec-146	2.18033	0.00587452	pho-6	1.3266	0.120048	F21C10.11	1.94746	0.00260648
T12A7.6	1.15104	0.0124694		W09D12.1	2.17693	0.00587452	T04A6.1	1.3265	0.0376988	ftn-1	1.94333	0.00359765
M03A1.8	0.637063	0.178806		lpd-7	2.17397	0.00766579	cyp-37A1	1.32638	0.0813072	Y94H6A.10	1.94049	0.000898791
M163.1	1.14923	0.000947178		F14F9.4	2.17248	0.313489	R10H1.1	1.31954	0.0829323	fip-6	1.93265	0.0340414
C35C5.8	0.599895	0.17011		F54D5.3	2.17145	0.00587452	asah-1	1.31875	0.0364277	clec-264	1.92731	0.00235277
atg-2	0.663253	0.0224528		C33H5.13	2.16787	0.023283	dhs-20	1.3149	0.0806172	fipr-22	1.92444	0.000892097
F57A8.6	0.653309	1		T02C5.1	2.16708	0.00587452	C04G2.3	1.31434	0.0231617	F16H6.10	1.92399	0.00196177
linc-82	0.590926	1		maoc-1	2.16634	0.00762752	M60.4	1.30281	0.0460661	clc-1	1.92234	0.00169615
C50H2.7	0.624189	1		zig-7	2.15907	0.00623106	F45D3.3	1.29878	0.0321451	D2045.8	1.91829	0.00816788
C34C6.7	0.913475	0.0364695		R10H1.1	2.14697	0.00734151	msp-79	1.29468	0.0407879	F43C11.7	1.91387	0.00268894
cyp-35B1	0.595541	0.457051		F35E12.9	2.14396	0.29253	acs-7	1.29089	0.0938236	spp-2	1.90992	0.00311243
K08F4.5	0.784789	0.348048		Y17G7B.8	2.14059	0.0149084	Y59E9AL.2	1.28975	0.0035919	Y54G2A.10	1.90842	0.00222657
Y69A2AR.12	1.25496	0.0239359		dod-23	2.14009	0.00599954	T07G12.5	1.28743	0.0394453	D1086.2	1.90479	0.00116857
oac-5	4.62819	0.161143		B0334.3	2.13944	0.00587452	fmo-1	1.28376	0.104497	F47B8.4	1.90353	0.00109184
clec-73	2.22292	0.000947178		T20D4.11	2.13065	0.00587452	Y48A6B.9	1.28367	0.0516672	F53B7.7	1.90229	0.00528775
F46A9.2	0.962649	0.419451		lgc-22	2.12806	0.00872125	F18C5.10	1.27938	0.0588724	C29F9.4	1.90225	0.00492122
F46A9.1	0.706522	0.3543		hmit-1.3	2.12769	0.0159494	T19E7.6	1.27846	0.0420641	pqn-89	1.89899	0.00245599
T08B2.12	0.733392	0.667751		cnc-4	2.12473	0.00988499	cex-2	1.2729	0.100752	cnc-6	1.89646	0.00528775
Y49F6B.8	0.600226	0.637883		ZK813.2	2.12099	0.00692672	msp-59	1.2697	0.0629188	ttr-17	1.8944	0.00176294
peel-1	0.551981	0.696997		glc-1	2.11617	0.0107622	R11F4.1	1.26876	0.0447675	cnc-2	1.88741	0.0133088
C17H1.7	0.779943	0.404417		lact-3	2.11548	0.010767	ugt-52	1.26861	0.186947	pqm-1	1.8847	0.0117489
fbxa-143	1.80342	0.0105766		srr-6	2.10604	0.2431	ZC581.3	1.26844	0.0592603	clec-70	1.88103	0.00212105
zip-5	3.23688	0.0773913		math-38	2.1052	0.00587452	W08A12.2	1.26825	0.102878	F41C3.8	1.87393	0.00296051
T27C5.8	13.4873	0.000947178		rop-1	2.09815	0.00587452	C35C5.9	1.26703	0.0355135	fbxa-219	1.87278	0.00220343
clec-232	1.20349	0.0618272		sto-1	2.09685	0.10714	F43G6.8	1.26477	0.301564	fbxa-24	1.86294	0.00274299
dod-20	2.56936	0.0131851		C33C12.3	2.09218	0.00587452	T27A3.4	1.26308	0.0528566	T28A11.19	1.86181	0.00203535
F54F12.1	1.46584	0.0456292		C03B1.14	2.09013	0.00652923	Y17D7B.4	1.26026	0.0150764	dos-1	1.85982	0.00160298
ttr-9	0.724528	0.642722		K07E3.4	2.0819	0.00727281	asm-2	1.25808	0.0428055	zmp-1	1.85615	0.00211701
Y105C5A.1269	9.47184	1		C44B7.10	2.08166	0.00751137	msp-56	1.25804	0.0478134	gbh-2	1.85514	0.00229796
Y69A2AR.25	2.17828	0.100973		F26A3.4	2.07857	0.00587452	Y37H2A.14	1.25735	0.156386	ttr-30	1.85056	0.00315126
Y69A2AR.23	1.29254	1		gst-22	2.07738	0.0511888	msp-45	1.25492	0.0368568	lys-7	1.84699	0.0175668
nspa-5	1.05362	0.263083		Y49E10.18	2.07373	0.0184341	cex-1	1.25326	0.21859	dhs-18	1.84238	0.00595724
C37C3.10	1.19303	0.499989		fbxa-60	2.07327	0.0159985	C39B5.14	1.24969	0.0792436	F54D1.6	1.84099	0.00334394
dod-23	0.712111	0.0145946		T04F8.7	2.06697	0.00623106	clh-1	1.24819	0.075557	T20D4.11	1.83555	0.000353785
F40H6.1	0.515649	0.611011		T12B3.3	2.0667	0.0357892	C49F5.7	1.24693	0.00594586	C18H9.5	1.8311	0.00160039
B0218.5	0.740179	0.462614		snb-2	2.06546	0.00587452	spp-1	1.24689	0.0115385	F47D12.6	1.821	0.00163535
B0244.10	0.873751	0.0545484		clec-47	2.06428	0.005971	C35A5.6	1.24391	0.113328	T16G1.7	1.81973	0.0018593
F09F9.3	1.68204	0.102339		col-135	2.06257	0.0105549	ilys-4	1.24349	0.144175	ptr-22	1.81964	0.00219451
C29F3.7	1.71766	0.00680229		clec-5	2.06243	0.008242	ptr-8	1.23971	0.168618	C33C12.3	1.81939	0.00203158
K10G4.3	2.23076	0.00815658		C50F4.1	2.05796	0.00734151	col-12	1.23799	0.232994	F46C5.1	1.818	0.0021472
fbxa-125	1.32719	0.284547		F58A6.1	2.05687	0.0476213	T27E4.7	1.23706	0.0452126	T04A6.1	1.81451	0.00179853
mboa-4	0.53846	0.772917		nex-2	2.05457	0.00708669	msp-51	1.2368	0.0229082	pgp-6	1.80813	0.00259385
Y36E3A.2	1.17846	0.173746		nlt-1	2.04824	0.00838944	tag-38	1.23132	0.0679984	fbxa-105	1.7992	0.00060418
Y71G12B.22	1.03389	1		msp-79	2.04118	0.0394074	C04G2.9	1.22983	0.0902766	F21C10.4	1.79815	0.000495529
Y57G11C.48	0.641109	1		Y53H1B.2	2.03916	0.00589707	C10C5.4	1.22939	0.0498589	Y54G2A.52	1.79724	0.00436353
B0207.9	0.538327	0.747785		lys-6	2.03641	0.0202539	lact-2	1.22	0.202872	F01G10.11	1.7902	0.0287337
B0207.1	1.26258	1		C32D5.6	2.0355	0.00608058	C39B5.10	1.21031	0.653445	C49G7.12	1.78516	0.00139972
ZK673.6	0.622633	1		D1086.5	2.03547	0.019705	C02F5.7	1.20692	0.0634312	cex-1	1.78225	0.00213406
F35E2.10	0.796996	1		T19H5.4	2.03147	0.00587452	F16B4.4	1.20608	0.161585	T16G1.5	1.77723	0.00217096
F36A2.14	0.588316	0.51725		C29F9.4	2.02913	0.0679955	T18D3.7	1.20194	0.0667377	C42D4.1	1.77018	0.00143629
T24E12.5	3.18527	0.000947178		acs-11	2.02772	0.00712495	F53A9.1	1.20176	0.179478	srr-4	1.76216	0.00232372
F10G7.12	1.07219	0.507318		F08G2.4	2.02746	0.00638864	R04B5.5	1.20075	0.0221196	C30G4.7	1.76142	0.00320599
F36A4.2	0.652475	0.670465		C10C5.2	2.02564	0.273043	C26E1.2	1.19905	0.163738	ZK550.6	1.76	0.00753985
Y71G12B.32	5.98422	0.517211		tag-253	2.02529	0.00770906	C36B1.6	1.19738	0.0350565	M28.8	1.74602	0.00169615
fbxa-54	1.13481	0.000947178		F10E9.12	2.02376	0.0284314	brp-1	1.19258	0.0688199	zip-2	1.73744	0.00291802
fbxa-51	1.3914	0.000947178		msp-51	2.02273	0.0145508	C05D9.9	1.19158	0.08627	Y51H4A.25	1.73626	0.000572933
F44G4.5	0.621459	0.616135		F14F9.3	2.02056	0.331461	fip-6	1.18705	0.103362	F45E4.5	1.73339	0.00356698
Y53F4B.36	1.8328	1		F27E5.1	2.01853	0.00991406	msp-3	1.18665	0.0239944	nhr-117	1.73304	0.00173486
T10E9.6	2.17936	0.261107		F22H10.3	2.01803	0.0123867	F11F1.6	1.18384	0.0800638	M7.12	1.73089	0.00325791
C25F9.12	2.18994	0.0180251		msp-81	2.01439	0.0308646	tag-243	1.18338	0.109167	Y15E3A.5	1.71779	0.00299161
F48G7.13	1.21111	0.249262		nex-1	2.00984	0.00587452	Y73C8B.1	1.1832	0.180327	T19E7.6	1.71715	0.0122822
scrm-5	0.690998	0.557537		H34I24.2	2.00863	0.00587452	H06I04.6	1.17998	0.104228	sma-5	1.71539	0.00295507
W08A12.4	0.762397	1		C16B8.3	2.00686	0.0107796	Y37D8A.16	1.17666	0.08627	pqn-92	1.71155	0.00202793
T08E11.1	0.658653	1		msp-76	2.00619	0.032489	msp-152	1.1765	0.0729119	R04B5.5	1.71006	0.00216698
Y47D9A.4	2.75116	1		dhs-28	2.00138	0.00587452	C24G6.6	1.17387	0.0340553	flp-14	1.70796	0.0047263
fbxa-85	1.78547	0.003081		sgk-1	1.99745	0.0129636	msp-55	1.16805	0.0546503	C32F10.4	1.70716	0.000998687
hrg-3	0.661287	0.637796		clp-4	1.99711	0.0140272	D1086.2	1.1669	0.0654762	Y53C12B.7	1.70203	0.00132098
arrd-8	1.20419	0.315114		sid-2	1.99681	0.00748511	ZK131.11	1.1667	0.0938236	C10C5.3	1.69233	0.0100554
irld-18	0.612319	0.732634		F59A6.12	1.99584	0.00765623	Y82E9BR.23	1.16664	0.13237	clec-7	1.68643	0.00324048
B0348.2	1.00499	0.37872		B0024.4	1.99502	0.329583	F53B7.7	1.16647	0.133282	Y54G2A.11	1.68417	0.000532712
F40F12.3	0.608802	0.493962		C06H5.7	1.99492	0.0225291	C50F4.1	1.16525	0.0673886	R05H10.1	1.67689	0.000541616
F40F12.8	2.47076	0.0195148		msp-78	1.9949	0.0274516	msp-36	1.16381	0.0419832	Y18H1A.11	1.67256	0.00276169
plc-2	0.757703	0.0270007		C25A8.4	1.99463	0.005971	lbp-5	1.16376	0.00507322	C14C6.5	1.6724	0.00364077
try-7	0.67563	1		ZK1037.6	1.99222	0.201999	msp-74	1.16313	0.0318855	C29F9.3	1.67232	0.00332343
dct-3	1.98028	0.0160358		msp-59	1.99031	0.0268314	aagr-1	1.16191	0.00416305	nlp-28	1.67144	0.00197199
str-163	0.590434	0.670791		dpf-2	1.98835	0.00615973	T01E8.1	1.16105	0.0615764	F52F10.2	1.66991	0.00593822
C24A11.1	0.585179	0.396203		acdh-10	1.98633	0.00751167	T06D8.1	1.16074	0.110586	Y51A2D.13	1.66829	0.0103525
sptf-2	1.73122	0.00366533		F31F7.1	1.98624	0.00945964	zig-7	1.15834	0.0447675	F41G3.10	1.66702	0.00379532
his-11	3.4983	0.517564		F37C4.5	1.98382	0.018769	C48E7.7	1.15834	0.0806172	kgb-2	1.66468	0.000511782
F42G2.5	0.501122	0.449066		C27B7.9	1.98355	0.00881262	asp-5	1.15821	0.0202867	B0564.3	1.66455	0.00457251
F42G2.2	0.818195	0.0241992		C49G7.10	1.97467	0.372414	T10H9.8	1.15692	0.100877	cyp-33C4	1.66205	0.00329176
fbxa-4	0.992133	0.0297367		vhp-1	1.9693	0.0228101	ttr-37	1.15618	0.265457	fip-2	1.65919	0.00364839
F38A5.6	0.765248	1		clec-10	1.96745	0.00916656	F43H9.4	1.15593	0.128833	cul-6	1.65814	0.00196177
F33D11.7	0.771486	1		C04G2.3	1.96448	0.0320366	mtl-1	1.1545	0.467679	Y41D4B.17	1.65586	0.00259852
F56D5.2	0.889365	1		Y59C2A.1	1.96387	0.016611	lys-6	1.14956	0.100463	Y77E11A.14	1.65289	0.00197199
T06C10.3	0.62783	1		msp-56	1.96354	0.0272925	W02A2.9	1.14945	0.161877	C35C5.9	1.65266	0.000532712
fbxa-176	0.795972	0.319801		D2030.2	1.96244	0.00625751	F54C9.3	1.14888	0.0309984	F55A12.6	1.65257	0.00253533
B0507.6	1.05288	1		zip-5	1.95928	0.144572	cdo-1	1.1471	0.120532	C06B3.7	1.64668	0.0028446
math-22	0.592258	0.156759		ccg-1	1.95488	0.0087027	C06G3.5	1.1449	0.02967	nhr-58	1.64556	0.00304965
R08A2.2	0.526575	1		Y43B11AR.3	1.95482	0.0198767	F08B12.4	1.14408	0.070772	C33A12.4	1.64055	0.00183644
M28.9	0.708876	1		Y48G8AL.13	1.95197	0.0111225	K02A11.4	1.14283	0.033913	C17B7.4	1.63873	0.00222197
F59A6.2	0.601511	0.670791		msp-55	1.94991	0.0445475	msp-31	1.13762	0.0679984	R10H1.1	1.63527	0.00259923
F59A6.4	0.673611	1		asc-1	1.94954	0.00623106	ZC239.1	1.13404	0.0567561	K03H1.10	1.63411	0.00222197
F35E12.10	0.505837	0.118468		pqn-44	1.94785	0.00672056	lact-3	1.13403	0.0834568	F36D3.7	1.6333	0.0844481
C49C8.1	0.745316	0.458426		asp-2	1.94739	0.00587452	F13D12.3	1.13253	0.276179	R08F11.4	1.63204	0.0110985
Y75B7B.1	0.631487	0.412827		ssq-4	1.94724	0.0109364	msp-37	1.12978	0.0592401	cyp-34A4	1.62833	0.00108236
clec-83	3.57266	0.448503		C25G4.2	1.94329	0.00690932	ctl-1	1.12629	0.106843	F17C11.11	1.62617	0.00160526
Y37F4.1	0.983437	0.201646		F23F1.6	1.94304	0.00661801	ZK1248.4	1.12157	0.0615764	C34H4.1	1.62303	0.00178438
clec-240	12.3533	1		ZK673.2	1.94036	0.00587452	C54F6.5	1.11893	0.167438	tag-244	1.62249	0.00164411
F49H6.3	1.22628	1		hil-5	1.93854	0.00599954	cal-2	1.11877	0.0595672	F56D5.6	1.62107	0.00216493
R01H2.2	0.548468	1		C18E9.9	1.93764	0.00731342	nhr-121	1.11798	0.052289	B0348.2	1.62047	0.00141856
W04B5.3	0.580243	0.510991		C23G10.11	1.93761	0.00625751	F57H12.6	1.11606	0.277268	Y47G6A.5	1.61935	0.00270009
C54G4.3	0.607592	0.572543		Y105C5A.8	1.93598	0.012304	asp-3	1.11561	0.0219654	F59E11.7	1.61926	0.0022396
F55B11.4	0.566764	0.0645304		F07F6.8	1.9311	0.00715485	Y77E11A.14	1.11552	0.197701	clec-146	1.61847	0.00179853
lys-1	2.07243	0.043181		F18G5.6	1.92823	0.00690066	ZC247.1	1.11442	0.0128608	T28F4.5	1.61841	0.00374792
C55C3.4	0.530873	0.647316		Y57E12AL.1	1.92572	0.00617195	F25E5.8	1.10885	0.0411293	C54D10.14	1.61528	0.0036497
Y119C1B.1	0.740874	1		ddo-1	1.9256	0.0292381	cpr-3	1.10736	0.0864892	F39E9.1	1.61313	0.00263016
Y6E2A.10	0.893073	0.373751		R102.5	1.92177	0.005971	crm-1	1.1055	0.110586	ugt-52	1.61086	0.00326421
pcp-4	1.51937	0.0367424		prx-11	1.92075	0.0165288	T22B7.3	1.10423	0.501888	C37A5.3	1.60532	0.00289695
R03H10.6	0.574434	0.409331		Y39B6A.5	1.91889	0.0112488	ZK1128.7	1.09888	0.0898427	C36B1.6	1.60289	0.00313537
Y75B8A.39	4.78434	0.305855		Y37H2A.14	1.91509	0.378199	tep-1	1.09818	0.0871129	arrd-8	1.59769	0.00131867
F42C5.5	0.59049	0.558997		lbp-5	1.91224	0.00587452	pho-9	1.09465	0.393423	cal-2	1.59552	0.000785729
T13F3.8	0.674166	0.479549		C16A3.6	1.9122	0.0134571	T24E12.6	1.09276	0.716379	dod-19	1.59041	0.00233776
Y6E2A.5	1.18672	0.116926		spp-3	1.91126	0.00629928	C33A12.4	1.08757	0.200126	fbxa-74	1.58827	0.0017138
C38C3.8	8.69831	1		C10C5.4	1.91067	0.00850964	C49G7.3	1.08634	0.0432489	F20G2.5	1.58398	0.00147514
fbxa-12	1.79152	0.32959		lgg-2	1.91021	0.00599954	ddo-1	1.08329	0.111042	pme-4	1.5833	0.00268894
Y113G7B.14	1.21851	0.000947178		Y69A2AL.2	1.90519	0.018756	dod-22	1.08294	0.0856576	dhs-31	1.58227	0.0015669
C17G10.3	0.595972	0.595847		gem-4	1.90309	0.138102	Y43F8B.2	1.08085	0.0485357	pept-3	1.58097	0.00686505
T09A12.1	0.529632	0.679666		msp-45	1.903	0.0363488	dhp-1	1.07991	0.0480693	D1086.5	1.57749	0.000878276
fbxa-175	0.561416	0.419121		lys-2	1.90209	0.123769	K12B6.9	1.07904	0.0479807	cyp-14A5	1.57507	0.00163545
C03C10.2	0.615675	0.602634		rps-15	1.90026	0.0110665	C12D8.3	1.07893	0.0548751	T23F11.6	1.57477	0.00151423
dmsr-2	0.86043	0.0632038		M176.4	1.90013	0.0203683	phat-3	1.07868	0.0592603	K02D7.1	1.5708	0.00499365
ZC250.5	1.11793	0.438314		C06G8.3	1.89758	0.0141324	K08D9.4	1.07658	0.237297	nhr-231	1.56839	0.00123255
Y54G11A.4	0.580317	0.193159		acs-7	1.89693	0.0460436	F33D11.8	1.07541	0.368799	M05B5.2	1.56729	0.0024561
best-25	0.862363	1		T23F11.6	1.89522	0.286508	C28G1.6	1.07245	0.0424084	H02F09.3	1.56673	0.000773973
F11D5.7	1.26255	0.0801462		tyr-4	1.89438	0.0167582	Y55F3AM.10	1.0706	0.100435	M60.4	1.56616	0.00407662
F38E1.3	0.99881	0.439212		C09D4.2	1.88878	0.00625751	msp-38	1.06781	0.0423551	flp-18	1.56289	0.00188882
scl-24	1.36456	0.0632038		alh-1	1.88854	0.00792899	T08B2.12	1.06759	0.0837938	C31H5.6	1.56026	0.00490597
C25F9.4	1.0337	0.00632705		acs-14	1.88371	0.0137983	lgg-1	1.06757	0.0609792	C45G9.6	1.55992	0.00179853
C49G7.1	0.73912	1		nuc-1	1.88307	0.00819739	K06A4.7	1.06697	0.172266	ZK1290.14	1.5597	0.0031468
clec-46	11.6023	1		rps-1	1.88148	0.008507	sma-4	1.06691	0.0628006	gem-4	1.55664	0.00279019
Y38H6C.15	1.0133	0.371208		ttr-6	1.88045	0.00587452	ttr-59	1.06684	0.225171	Y37A1A.2	1.55392	0.00314151
fbxa-155	0.588806	1		tag-242	1.87998	0.00940835	W03D2.7	1.06605	0.100877	C08E8.4	1.55155	0.00374014
C15C7.5	0.571713	0.049293		hil-2	1.87916	0.00587452	C14C11.4	1.0646	0.106227	Y55B1BL.1	1.55051	0.00234654
F22B3.8	0.632626	1		Y54E10BR.4	1.87852	0.0168558	nas-11	1.06355	0.136962	gst-22	1.54882	0.00183644
C07E3.4	1.96236	1		Y37E3.8	1.87754	0.00930749	clec-71	1.06247	0.114353	F40F12.7	1.54208	0.00345501
Y39A3A.3	1.882	0.0306641		F13H10.6	1.87636	0.00587452	ads-1	1.06061	0.0565644	C23H4.6	1.53891	0.00335582
linc-38	3.05531	0.410672		pqn-53	1.87535	0.00587452	fbxa-24	1.05988	0.10136	F08F1.4	1.53499	0.00260439
Y46G5A.22	0.519039	0.617417		msp-152	1.87422	0.0265118	R02D5.7	1.05856	0.103903	ilys-4	1.53308	0.00108236
trx-3	0.873862	0.0415095		rps-6	1.87293	0.0139426	M01A8.1	1.05784	0.138836	C50F4.9	1.52795	0.00186661
C52E4.7	0.939802	0.316049		rpl-10	1.8716	0.0143616	F55G1.12	1.05753	0.0771641	C38H2.2	1.52361	0.00352374
F36D3.8	1.04703	1		tat-4	1.87103	0.00615973	C35D10.2	1.0547	0.0959908	F17C11.4	1.52299	0.00334359
sdz-35	6.32292	0.305855		F53C11.3	1.87076	0.0132236	dod-6	1.05389	0.10809	ptr-3	1.52071	0.00147514
AC7.3	0.534373	1		C12D8.3	1.87031	0.0222171	M176.4	1.05336	0.0674901	Y17G7B.8	1.52043	0.00582752
ZK1320.3	0.560799	0.11947		K02C4.5	1.86998	0.00587452	F41G4.8	1.0526	0.0616793	W03B1.2	1.51835	0.00179091
F56C3.9	0.800288	0.303601		Y48G10A.3	1.86984	0.0077965	tsp-1	1.05126	0.452117	W09D12.1	1.51641	0.00356217
jmjd-1.1	0.637807	1		W06H8.5	1.86866	0.00636894	pmp-1	1.05035	0.0677241	F08D12.3	1.5144	0.00405824
C53B4.2	0.66161	1		C15A11.7	1.86847	0.0344757	ech-8	1.04982	0.0964783	W08A12.2	1.51406	0.000938667
H23L24.2	0.955449	1		T10B5.7	1.86755	0.00587452	Y59H11AM.1	1.04861	0.0700353	klf-1	1.51275	0.00341345
F16H6.10	2.84239	0.000947178		K10C2.3	1.86698	0.00587452	K02A11.3	1.04796	0.0524018	Y73C8B.1	1.50779	0.00141856
pph-2	1.7497	1		skr-1	1.86689	0.005971	pgp-6	1.04773	0.0889622	B0331.2	1.50322	0.00172128
fbxa-202	0.591551	1		F30A10.14	1.86683	0.00795637	pept-3	1.04751	0.161877	ncs-3	1.50244	0.00183644
comt-2	3.59204	0.00242805		K03A1.2	1.86643	0.00587452	nhr-134	1.04714	0.104228	lipl-3	1.49723	0.00303805
Y47H10A.5	3.78633	0.000947178		ZK1248.4	1.8647	0.0348344	fbxa-60	1.04694	0.137701	hil-1	1.49575	0.00179853
dod-22	4.22869	0.000947178		Y77E11A.2	1.86248	0.0109604	C14C6.5	1.04636	0.180198	tag-117	1.49516	0.0030063
oac-7	2.23778	0.000947178		ifb-2	1.86176	0.00650764	ssq-4	1.04336	0.0628006	C42D8.1	1.49451	0.00271324
oac-6	1.66861	0.000947178		W06B4.2	1.86152	0.00637749	C07E3.9	1.04239	0.104779	dhs-14	1.49418	0.00236098
Y71G12B.2	4.05982	0.000947178		Y32F6A.5	1.85992	0.005971	Y69A2AL.2	1.04198	0.035378	fbxa-4	1.49321	0.00245334
tsp-2	4.43073	0.000947178		msp-3	1.85942	0.0260669	F53A9.6	1.0405	0.275913	tnc-2	1.49106	0.00374014
clec-143	2.59994	0.000947178		far-2	1.85808	0.00631126	lea-1	1.03945	0.0241108	far-8	1.49074	0.00863409
ncr-1	1.46527	0.000947178		lys-1	1.85727	0.0312216	nspd-2	1.03569	0.0962175	C35B8.4	1.48939	0.00216335
fbxa-30	4.68884	0.0506355		C08G9.1	1.85711	0.00587452	B0281.3	1.03523	0.0768603	F54B8.4	1.48794	0.00317703
C16B8.3	1.48069	0.000947178		msp-42	1.85661	0.0420828	F41H10.2	1.03507	0.0635961	M01G12.8	1.48496	0.00196177
Y17G7B.8	2.12504	0.000947178		cbp-1	1.85647	0.0200334	T05F1.11	1.03258	0.144784	M01A8.1	1.48492	0.00295658
F19B2.5	2.63059	0.000947178		K12H4.7	1.85618	0.00587452	K09H11.1	1.03104	0.0388484	C53B7.3	1.48485	0.00219288
H20E11.3	2.14315	0.000947178		msp-74	1.85503	0.0328985	F44D12.4	1.02918	0.0781073	R07A4.2	1.47837	0.00261057
nhr-6	3.95762	0.000947178		F44E7.5	1.85223	0.0326132	M03A1.8	1.02646	0.137475	ttr-59	1.47527	0.00743896
F20G2.5	3.96589	0.000947178		rps-27	1.85179	0.010662	T05F1.9	1.02632	0.143157	Y69A2AL.2	1.47346	0.00438333
C23G10.11	2.90475	0.000947178		ztf-7	1.85038	0.00647382	lgc-22	1.02606	0.100962	C06H5.7	1.46867	0.0359555
vhp-1	1.15929	0.00242805		F33H2.6	1.84942	0.0106037	Y55B1BL.1	1.02435	0.0634312	ttr-29	1.46846	0.00179853
dod-19	2.25146	0.000947178		rpl-13	1.84912	0.00587452	ZK669.2	1.02321	0.0691789	Y39B6A.24	1.46714	0.0104577
Y17D7B.3	5.81083	0.0444294		aagr-1	1.84899	0.0205216	clec-35	1.02033	0.634155	C01G10.17	1.4661	0.0016979
Y17D7B.2	3.45692	0.000947178		BE10.6	1.84234	0.00943194	ZK930.2	1.01994	0.0229082	T05F1.9	1.46603	0.00607415
K09D9.1	3.73963	0.000947178		F16C3.2	1.84035	0.012628	R13D11.10	1.01684	0.181168	ZC239.1	1.46279	0.00179091
C49G7.12	5.32686	0.000947178		F07H5.5	1.84023	0.00587452	sgk-1	1.0137	0.0318855	D1086.1	1.46069	0.00495913
C49G7.10	2.55341	0.000947178		dpy-14	1.83697	0.00587452	W01F3.2	1.0106	0.179349	F49H6.13	1.45792	0.00203848
Y58A7A.4	3.08541	0.000947178		F40H6.6	1.83696	0.016143	F23F1.6	1.00739	0.0318855	Y41D4B.16	1.45543	0.00555316
Y58A7A.5	2.3726	0.000947178		rpl-33	1.83603	0.0076559	C54C6.7	1.00633	0.0762644	C06G8.1	1.45514	0.00694141
F21C10.11	2.25222	0.000947178		T28B8.1	1.83497	0.00649428	fbxa-54	1.00548	0.0724507	F15A8.6	1.4532	0.0032302
T16G1.5	3.90768	0.000947178		F56H9.2	1.83286	0.00692967	F46H5.7	1.00481	0.219518	cnc-10	1.44888	0.00238974
T16G1.6	1.85261	0.000947178		rps-22	1.8326	0.00990918	gstk-1	1.0047	0.0628006	B0310.3	1.44694	0.00108236
abt-4	1.23423	0.000947178		ilys-3	1.83145	0.00655416	F21C10.10	1.004	0.0103547	F41G4.8	1.44659	0.0017308
C48B4.1	1.17593	0.000947178		W01A8.2	1.83053	0.0094433	C39D10.11	1.00353	0.144003	F54C9.3	1.44596	0.00242545
pcp-2	1.84339	0.000947178		D1086.10	1.83028	0.0065273	C34D10.2	1.00243	0.259037	trpa-2	1.44256	0.00108236
F44G3.10	2.1276	0.000947178		ZK1320.2	1.83008	0.00613736	Y95B8A.6	1.00184	0.181173	C15C7.5	1.43616	0.00198506
srr-6	1.62656	0.000947178		itx-1	1.82986	0.00706163	H02F09.3	0.999516	0.03552	H20E11.3	1.43226	0.00624245
hpo-6	3.73493	0.000947178		msp-36	1.82951	0.033236	msd-4	0.998806	0.0938983	F39G3.5	1.43217	0.00114736
C54D10.13	2.27381	0.000947178		W01D2.1	1.827	0.0109721	F21F8.2	0.99674	0.133282	C33H5.13	1.43053	0.00674029
valv-1	2.59869	0.000947178		D2045.8	1.82617	0.00723291	cyp-29A2	0.994994	0.0510383	sma-2	1.43031	0.00343014
Y69A2AL.2	3.18952	0.000947178		F28F5.6	1.82564	0.0381791	cpz-2	0.994472	0.0975004	pqn-31	1.42947	0.0018023
fbxa-150	1.58568	0.000947178		C25A1.4	1.82518	0.0102119	maoc-1	0.993147	0.00804858	F11F1.6	1.42641	0.00530796
T24A6.7	3.83718	0.000947178		rpl-26	1.82288	0.00744217	unc-64	0.988582	0.148804	F14H12.3	1.42601	0.00427016
C18H9.6	1.22794	0.000947178		pab-1	1.82281	0.00690932	gbh-1	0.988135	0.166869	flp-1	1.42252	0.00268894
Y54G2A.49	2.35813	0.000947178		C50B8.3	1.82229	0.00962367	C17B7.4	0.985587	0.0583049	F36F2.2	1.4221	0.00610425
D2007.1	1.04312	0.00531842		eef-1A.2	1.82105	0.00631076	W02B12.1	0.9816	0.0272382	C17B7.10	1.42209	0.00260419
H43E16.1	2.58416	0.000947178		cpz-2	1.81818	0.021401	tag-253	0.9794	0.0814807	cdf-2	1.4202	0.00188614
T26H5.9	3.73677	0.000947178		ssq-3	1.81714	0.0237072	msp-40	0.977932	0.0472849	F21G4.1	1.41811	0.00559065
oac-20	1.14957	0.000947178		F13G11.3	1.81588	0.00703689	C32D5.6	0.977564	0.0956946	tep-1	1.41438	0.00196177
Y34B4A.6	1.17772	0.000947178		Y39C12A.2	1.81586	0.010837	mab-31	0.976387	0.047337	ZK418.7	1.41046	0.00234089
clec-84	2.06711	0.000947178		fbxa-108	1.8135	0.0157496	msp-50	0.975845	0.0321451	srsx-34	1.41025	0.0023979
tth-1	1.24416	0.000947178		R01B10.4	1.81318	0.0211174	T19H5.6	0.97557	0.071343	nhr-99	1.40898	0.00564214
R03G8.3	1.70222	0.000947178		fipr-22	1.81161	0.0215406	lips-10	0.975395	0.0655072	F20A1.10	1.408	0.006543
C10C5.2	4.23871	0.000947178		T01G9.2	1.81052	0.00587452	F36G3.3	0.969217	0.620338	C26E1.2	1.40685	0.00345854
tba-7	1.66863	0.000947178		K08C9.7	1.81039	0.00857611	C31H5.6	0.968595	0.0929301	C05B5.8	1.40617	0.00435398
irg-3	4.92579	0.000947178		rps-20	1.80905	0.0169467	F52H3.5	0.968282	0.13997	T19B10.2	1.4044	0.00271149
F35E12.8	3.92309	0.000947178		rps-17	1.80841	0.0101694	ZK484.5	0.967794	0.144003	fipr-1	1.40196	0.0188287
W02A2.9	1.8045	0.000947178		rps-29	1.80838	0.0119586	ugt-4	0.965733	0.205702	dod-6	1.40052	0.00261057
fbxa-31	1.58397	0.000947178		H29C22.1	1.80811	0.00666689	F53C11.3	0.96499	0.065432	F47B8.3	1.39996	0.00313667
H03A11.2	1.30743	0.000947178		T07A9.9	1.80741	0.0232009	Y75B8A.4	0.962636	0.0688199	C54D10.3	1.39707	0.00977135
F25A2.1	4.20585	0.000947178		F58A4.2	1.80692	0.00840768	F56H9.2	0.961712	0.0410369	M03A1.8	1.39261	0.00422169
gba-1	0.653958	0.0577784		rpl-22	1.80611	0.00749597	vglu-2	0.961188	0.104228	R06F6.6	1.39187	0.00581501
C29F3.7	1.62301	0.000947178		gln-2	1.80592	0.0460669	F08F1.4	0.960467	0.133122	lips-10	1.39133	0.038069
lec-11	2.16019	0.000947178		T12G3.4	1.80468	0.00587452	C06E4.8	0.957115	0.166023	Y116A8B.4	1.39117	0.00177356
fbxa-89	2.14956	0.00632705		K10D11.5	1.80467	0.320406	Y45F10D.6	0.95688	0.107291	F48G7.12	1.39101	0.0255073
fbxa-37	1.76928	0.000947178		H19N07.3	1.80413	0.012238	C37C3.12	0.955582	0.599289	Y42G9A.3	1.39057	0.0047232
K01F9.2	2.01632	0.000947178		ssp-10	1.79768	0.0457073	F59F4.1	0.955277	0.0382967	cex-2	1.39053	0.00171287
lys-3	2.17292	0.000947178		rps-0	1.79635	0.00951141	ssp-10	0.95309	0.0924861	F16B4.2	1.38788	0.00211914
lys-2	3.85142	0.000947178		F59H6.3	1.79541	0.0101999	F19C7.2	0.953016	0.0660147	VZK822L.2	1.38574	0.00106907
T01D3.6	4.0676	0.000947178		R09D1.11	1.79412	0.0390451	F27E5.1	0.952956	0.0552365	unc-64	1.38386	0.00245599
C33H5.13	1.90569	0.000947178		K06G5.1	1.79397	0.00626832	nhr-58	0.952522	0.33113	R11D1.3	1.38078	0.00410814
pgp-5	4.30469	0.000947178		rpl-15	1.79341	0.00774926	Y41G9A.5	0.950742	0.376122	pgp-7	1.37973	0.00371823
F53A9.8	4.54268	0.000947178		arrd-8	1.79226	0.367581	upb-1	0.95053	0.0727087	clec-62	1.37909	0.00306741
F53A9.6	1.98982	0.000947178		ndx-6	1.79197	0.015368	Y7A9C.11	0.949367	0.0660147	flp-12	1.37441	0.00261057
F53A9.7	1.82529	0.000947178		rpl-35	1.79082	0.00811835	Y53H1B.2	0.949181	0.095648	Y55F3AM.10	1.37169	0.00213176
F53A9.1	3.24988	0.000947178		F52C6.13	1.79037	0.0120011	ssq-3	0.944982	0.0615764	F18G5.6	1.36915	0.00212849
F53A9.2	3.22429	0.000947178		rps-7	1.78881	0.00974305	mdl-1	0.942217	0.0688199	F20A1.1	1.36865	0.00491861
ZK1290.14	1.84646	0.000947178		C44E12.1	1.78849	0.0107585	C13C4.6	0.941035	0.0729119	D2063.1	1.36778	0.00198506
clec-66	2.96836	0.000947178		sip-1	1.78821	0.00587452	Y77E11A.2	0.940087	0.122186	C50B8.4	1.3668	0.00666345
F10E9.12	2.05665	0.000947178		fat-1	1.78709	0.00589707	C29F4.2	0.939028	0.104228	nhr-180	1.36623	0.00131203
K08D8.4	3.27749	0.000947178		MTCE.23	1.78674	0.00587452	asp-2	0.938773	0.512866	tag-243	1.36501	0.00109537
K08D8.4	3.13207	0.000947178		T19H12.2	1.78362	0.005971	T13F2.9	0.938705	0.159682	C13C4.6	1.36486	0.00420079
fbxa-127	3.10673	0.000947178		rpl-1	1.78358	0.00883554	his-71	0.938131	0.0557209	fip-5	1.36281	0.00482741
srz-99	2.83947	0.000947178		F10G8.9	1.78356	0.0114061	C35C5.8	0.938003	0.0428042	F47B8.2	1.35568	0.00119279
Y37H2A.14	4.77491	0.000947178		tsp-2	1.78296	0.220469	Y59C2A.1	0.936448	0.11646	sma-4	1.35511	0.00225736
oac-3	2.69193	0.00366533		K09H11.1	1.78198	0.0137994	VC5.2	0.933196	0.0230306	W01F3.2	1.35286	0.00226788
T06E6.15	2.06152	0.003081		ZC204.12	1.78159	0.00587452	clec-54	0.932478	0.0468366	hsp-70	1.34678	0.0719401
dod-24	5.58362	0.000947178		rps-19	1.78143	0.0110024	C53A3.1	0.931267	0.564821	Y62F5A.10	1.34611	0.0028289
tsp-1	4.86998	0.000947178		lec-2	1.78137	0.00620405	oac-14	0.926666	0.1929	fipr-2	1.34599	0.00186726
fbxa-128	3.89891	0.000947178		W03F11.1	1.78059	0.00695973	Y18D10A.23	0.925585	0.0876607	sru-22	1.3445	0.0026044
F31F7.1	1.60706	0.000947178		rps-24	1.77973	0.00891204	C53B7.3	0.92528	0.101699	Y116A8C.29	1.34247	0.00223063
arrd-7	0.835899	0.0166884		F43C9.2	1.77903	0.00644621	catp-7	0.923852	0.0768603	coel-1	1.34083	0.00179853
Y75B8A.28	1.75911	0.000947178		msp-49	1.77863	0.0268221	msp-64	0.922642	0.119555	K12C11.6	1.33717	0.00379532
C44H9.5	1.00803	0.000947178		tps-1	1.77808	0.0282251	Y69E1A.2	0.92212	0.0806462	F58A6.1	1.33591	0.00904478
C08E8.4	4.56816	0.000947178		clec-67	1.77619	0.125205	T28B8.1	0.921798	0.136803	F46C3.6	1.33459	0.00259685
M28.8	2.56399	0.000947178		cyp-14A5	1.77577	0.0289747	pqn-44	0.921439	0.13213	C49F5.7	1.33393	0.00849329
F39G3.5	1.242	0.000947178		rpl-41	1.77498	0.00748511	skr-19	0.92046	0.107282	numr-1	1.33316	0.0118698
pme-5	1.41387	0.00242805		rrn-3.1	1.77446	0.00587452	C12D8.9	0.920413	0.690738	Y95B8A.6	1.33205	0.00186726
T04F8.7	2.37216	0.000947178		F26A3.1	1.77443	0.00753918	Y53C12B.7	0.918802	0.0938236	F53F4.13	1.32921	0.0228203
F57B9.3	4.2453	0.00728876		rpl-34	1.7733	0.00934789	F08F3.4	0.916881	0.0358794	F23F1.6	1.32654	0.00338614
C49C8.5	2.13845	0.000947178		pmp-2	1.77241	0.0525018	msp-33	0.915682	0.0423551	R07C12.1	1.32612	0.00422012
C05B5.5	2.161	0.000947178		ceeh-1	1.77122	0.00795299	F26A3.4	0.91533	0.0629188	oac-46	1.32602	0.00179853
Y9C9A.8	1.8163	0.000947178		fat-2	1.7702	0.0061176	ZK380.5	0.911719	0.0970472	fbxa-157	1.32576	0.00396017
F49F1.6	3.43432	0.000947178		rps-9	1.77007	0.0104286	srx-21	0.911079	0.724624	pgal-1	1.32508	0.00880747
F49F1.7	1.73565	0.000947178		msp-31	1.76994	0.0478305	ttr-54	0.910271	0.0599447	nhr-18	1.32445	0.0023979
F49F1.1	2.07736	0.000947178		rpl-32	1.76911	0.00817388	F36A2.10	0.909596	0.0727087	tth-1	1.32407	0.00179853
clec-265	2.64416	0.000947178		F55B11.4	1.76825	0.0172273	C45B2.2	0.908568	0.225075	sulp-8	1.32392	0.00215241
T24B8.5	2.08394	0.000947178		rpl-38	1.76824	0.00795637	C47D12.5	0.906627	0.0592603	B0238.12	1.32206	0.00187242
lec-10	1.42454	0.000947178		far-6	1.76728	0.00592351	acl-7	0.905073	0.057645	F47E1.2	1.32117	0.00213813
F17C11.11	2.10304	0.000947178		W04D2.5	1.76633	0.0121033	cyp-14A5	0.905066	0.123061	cnc-7	1.32066	0.0122552
twk-28	1.79603	0.00856701		ZC477.5	1.7663	0.00631193	K01A2.10	0.902417	0.103362	B0272.4	1.31631	0.0199572
pbo-4	0.987103	0.000947178		rps-23	1.76583	0.00995679	spp-20	0.901302	0.518811	Y69A2AR.25	1.31488	0.00221116
Y40D12A.2	1.67506	0.000947178		B0564.3	1.76557	0.00599954	myo-3	0.901187	0.058171	Y46D2A.1	1.31473	0.00238748
C50F4.9	2.36268	0.000947178		Y58A7A.4	1.76501	0.341612	B0507.3	0.899401	0.0528566	ugt-2	1.31065	0.00593917
F40F4.6	1.53597	0.000947178		fib-1	1.76468	0.00913206	glt-5	0.896227	0.159341	Y82E9BR.23	1.30478	0.0051049
ugt-16	2.66743	0.000947178		pmp-1	1.76402	0.0978936	nhr-180	0.894708	0.11646	F22H10.2	1.3043	0.00342023
fbxa-59	2.42298	0.000947178		msp-37	1.76181	0.0524031	ccg-1	0.89371	0.173595	F53C11.1	1.30365	0.00276989
tat-2	0.556479	0.114429		C01A2.4	1.76156	0.00599954	M04D5.3	0.890713	0.134018	C49G7.10	1.30331	0.102486
fbxa-74	2.72492	0.000947178		ech-8	1.76082	0.030985	clec-49	0.890066	0.0486131	R05G6.10	1.30311	0.00169761
F22H10.2	2.38947	0.000947178		F56D2.5	1.76069	0.295617	asm-1	0.890031	0.102794	R07C12.2	1.30169	0.0121896
F39E9.1	1.23986	0.0353685		ssq-2	1.76033	0.0270918	dhs-31	0.888887	0.0672002	C12D8.9	1.30136	0.413229
sri-36	15.7746	0.000947178		cpi-2	1.75973	0.00587452	faah-2	0.888549	0.198271	catp-3	1.29981	0.00547346
Y94H6A.10	2.88299	0.000947178		alx-1	1.75929	0.00587452	Y57G11A.2	0.888317	0.210276	C05D9.9	1.29926	0.00527503
F56D2.5	2.50225	0.000947178		K10D11.2	1.75913	0.0313202	tre-5	0.888191	0.13237	fbxa-79	1.29738	0.00232372
T05F1.9	4.08143	0.000947178		pgp-6	1.75861	0.330751	F43C9.2	0.887924	0.0459445	ora-1	1.29716	0.00899978
ifd-2	1.65905	0.000947178		sma-4	1.75747	0.00625765	F59E11.7	0.887854	0.360067	tag-196	1.29625	0.0020578
linc-40	2.4445	0.003081		C37A2.7	1.75737	0.00932421	F53A9.2	0.887769	0.0903312	ZK669.2	1.2961	0.00394652
F13A7.11	1.81182	0.000947178		T19C4.5	1.7561	0.0184873	cbp-1	0.8869	0.0295038	F54F3.4	1.29333	0.0152642
C03B1.14	1.63391	0.000947178		W09C5.1	1.75604	0.0140108	srsx-34	0.885068	0.0086636	pgp-11	1.29311	0.00894525
F47D12.6	2.04271	0.000947178		eif-3.D	1.75598	0.00832349	F26F12.3	0.884242	0.115044	F13D12.3	1.29201	0.00250174
oac-14	2.15028	0.000947178		T23F11.1	1.75534	0.00790973	rpr-1	0.884221	0.219518	Y43F8A.3	1.2911	0.00397466
lec-8	1.66309	0.000947178		dhs-6	1.75499	0.00903048	acs-16	0.883741	0.284437	zip-5	1.28936	0.00918835
F55G1.15	1.12458	0.00424549		Y59H11AM.1	1.75474	0.040954	Y40B10A.9	0.883184	0.26205	F14B8.5	1.28903	0.00299895
swt-6	1.70847	0.000947178		rpl-12	1.75464	0.013612	C38C3.4	0.882991	0.0730509	dhp-1	1.28891	0.00270009
trpl-2	1.24439	0.00172993		prx-5	1.75429	0.0229777	C44E12.1	0.882599	0.0816671	C28C12.4	1.28877	0.0017138
fbxa-53	2.31854	0.000947178		his-71	1.75416	0.00587452	Y62F5A.10	0.881859	0.0422175	cdo-1	1.28818	0.00143421
klf-3	1.16242	0.000947178		nhr-55	1.75174	0.00658433	cls-1	0.880827	0.0586706	tnt-4	1.28739	0.00301571
Y94H6A.2	4.61209	0.003081		K07A1.13	1.751	0.0184116	tsp-10	0.88016	0.282795	R10D12.1	1.28695	0.00214255
T19D12.1	1.22815	0.000947178		ZK813.1	1.7508	0.012169	nspd-1	0.879857	0.136962	F25E5.8	1.28432	0.00380736
haf-7	1.47597	0.000947178		his-1	1.7508	0.00587452	clec-86	0.878564	0.347058	hsp-16.41	1.28366	0.0428766
Y46D2A.2	2.0222	0.000947178		C10G11.9	1.75063	0.0736968	R11H6.4	0.877568	0.0547947	F55C9.6	1.28302	0.00515411
T19D12.4	3.15151	0.000947178		M04F3.4	1.75053	0.00699565	trx-3	0.872645	0.205062	oac-58	1.28137	0.00180797
math-37	0.947142	0.0917135		Y42G9A.3	1.74667	0.00587452	F09F7.7	0.872214	0.0487387	M04D5.3	1.28092	0.00123645
tag-234	3.47655	0.000947178		ZC434.8	1.74659	0.0095632	skr-4	0.870175	0.0583049	C35A5.6	1.28012	0.00222978
pqn-89	1.19508	0.000947178		cey-2	1.74466	0.00587452	C14A6.10	0.869215	0.0342332	lipl-2	1.27989	0.00759676
fbxa-24	1.6625	0.000947178		K11D12.12	1.74443	0.011397	nlp-27	0.868787	0.131649	ifd-2	1.27752	0.00513343
F54E2.1	2.05971	0.000947178		rpl-39	1.74415	0.00790977	nhr-55	0.868754	0.0422627	pmt-1	1.27547	0.0182564
arrd-24	1.47939	0.0737303		ZK370.4	1.74407	0.008218	Y105E8B.7	0.868402	0.0164152	H06I04.6	1.27381	0.0028357
F28B4.3	1.20662	0.000947178		R05G6.10	1.74377	0.0146333	daf-22	0.868097	0.0592603	K08D8.4	1.27232	0.00909299
F23H12.3	2.11683	0.000947178		R09B3.3	1.7437	0.0137267	Y42G9A.3	0.866104	0.033743	F41B4.2	1.26827	0.00245399
K05B2.4	0.95384	0.0207606		snb-1	1.74316	0.00587452	srp-2	0.865974	0.0781073	fmo-1	1.26714	0.00211039
C06E1.7	2.79941	0.000947178		cey-3	1.74301	0.0076267	F41C3.8	0.865902	0.167438	fipr-7	1.26619	0.0199394
C50F7.5	3.65479	0.000947178		daf-22	1.74281	0.022003	K06A5.2	0.86536	0.132958	F18C5.10	1.26591	0.00365546
E02C12.8	3.08663	0.000947178		ZK822.2	1.74203	0.0201058	C31B8.4	0.862571	0.0806172	F40F8.4	1.26563	0.0102324
C16D9.4	2.134	0.000947178		polg-1	1.74125	0.0102828	pqn-92	0.862417	0.238384	F10C2.3	1.26556	0.00279333
K10D11.3	2.99289	0.000947178		F07H5.10	1.74108	0.005971	pmp-2	0.862271	0.0806172	math-41	1.26388	0.00560316
ZK1290.10	3.5115	0.000947178		D1086.7	1.74093	0.00852457	Y49E10.16	0.862109	0.0501629	nspc-17	1.26148	0.00275375
clec-67	3.30762	0.000947178		ppw-1	1.74093	0.00587452	C31B8.8	0.860832	0.262905	K02A11.4	1.26146	0.0314442
C06E4.8	1.32715	0.012065		ttm-1	1.74078	0.0271432	C14B1.3	0.860212	0.0956946	C08G9.1	1.2612	0.00197199
Y58A7A.3	2.88383	0.000947178		prmt-1	1.74069	0.00587452	aakg-4	0.859544	0.0670127	math-27	1.26108	0.00324396
C31B8.7	0.993365	0.0166884		ech-4	1.74035	0.00615973	Y69A2AR.25	0.859526	0.188967	ZC443.4	1.26067	0.00211701
ZK287.9	1.61069	0.000947178		ulp-3	1.73981	0.0510491	W05H9.1	0.858802	0.342258	C25D7.5	1.26054	0.00139666
B0244.6	2.08426	0.000947178		rps-13	1.73905	0.00772468	F47E1.2	0.858382	0.09327	cyp-32A1	1.26004	0.010603
F39E9.22	1.36838	0.00242805		W01A11.1	1.73867	0.014422	C30F12.3	0.856714	0.159471	nspc-18	1.25746	0.00299771
hum-8	1.22413	0.000947178		R144.5	1.73803	0.0104078	scl-6	0.855987	0.611728	tba-7	1.25354	0.00176919
fbxa-14	2.08784	0.000947178		cpn-1	1.73702	0.00587452	lec-2	0.854586	0.0801603	C08B6.3	1.2534	0.00606582
K10B2.2	1.48882	0.000947178		C17G1.2	1.73672	0.00689753	Y105C5A.24	0.854485	0.118577	R07B7.6	1.2533	0.00863409
lipl-1	0.896529	0.0209846		gsp-3	1.7357	0.0368243	irg-2	0.854432	0.275565	abf-6	1.25259	0.0164742
C18A11.1	1.94326	0.000947178		C27D9.2	1.73496	0.282657	dhs-28	0.853864	0.0459023	ZK1128.7	1.24959	0.00565436
H34I24.2	1.37772	0.000947178		vps-2	1.73432	0.00587452	sod-4	0.853763	0.0542948	Y50E8A.1	1.24752	0.00319513
F35E12.9	2.74796	0.000947178		rpl-14	1.73389	0.0122659	F40F8.5	0.852498	0.180124	T10H9.8	1.2467	0.0111744
fbxa-162	3.73196	0.000947178		R11D1.1	1.73377	0.0106158	B0403.6	0.852046	0.0615764	M7.8	1.24646	0.00265474
cul-6	2.22043	0.000947178		W02B12.1	1.73183	0.00599954	C30E1.9	0.851982	0.0991306	cbp-1	1.24535	0.00296827
F09A5.2	2.1756	0.000947178		baf-1	1.73113	0.00631126	C25A8.2	0.85193	0.106227	ugt-4	1.24454	0.00403973
F43C1.7	3.32392	0.000947178		F02E9.5	1.72972	0.00587452	fipr-21	0.851268	0.123037	F26E4.7	1.24375	0.00232868
ZK418.6	1.26743	0.000947178		clec-54	1.72895	0.0287364	R02D5.3	0.850894	0.372222	nspc-13	1.24279	0.00739885
sox-4	1.50507	0.000947178		Y59E9AL.2	1.7286	0.057748	F17C11.11	0.850848	0.0958185	C32D5.12	1.24231	0.00496866
F01D5.1	1.41093	0.000947178		ifd-2	1.72749	0.0824671	Y54G2A.52	0.850421	0.114042	ttr-45	1.2415	0.00249242
F01D5.5	1.52605	0.000947178		T14E8.1	1.72719	0.0124139	nrf-5	0.849748	0.0806172	skr-3	1.23629	0.0043532
Y22D7AR.7	2.36493	0.0138714		rpl-25.2	1.72685	0.0104286	ubc-23	0.849618	0.118549	C36E8.4	1.2357	0.00694357
B0462.5	2.30811	0.000947178		rpl-6	1.72621	0.0127942	C34C12.7	0.84957	0.0350565	F35C11.6	1.23507	0.00650819
F54D1.6	0.983977	0.000947178		clec-150	1.72557	0.00690932	nekl-2	0.848606	0.202765	acs-16	1.2345	0.00319658
C38H2.2	1.53166	0.000947178		dct-11	1.72538	0.00587452	cnc-10	0.84805	0.118852	ttr-51	1.23437	0.00293212
ugt-31	2.81317	0.000947178		rpl-30	1.72534	0.0118124	clec-7	0.847566	0.077334	F10D2.10	1.23284	0.00332569
Y22D7AL.15	2.54816	0.000947178		plp-1	1.72525	0.00637749	F40H6.6	0.846067	0.0693337	W02C12.2	1.23181	0.00387996
srd-64	2.34208	0.0183467		nhr-61	1.72448	0.00623106	C42D4.1	0.845212	0.360127	ZK1037.6	1.23171	0.00643496
T28H10.3	1.95225	0.000947178		K12B6.9	1.72415	0.0102637	F09F7.6	0.843079	0.448311	Y48A6B.7	1.23002	0.00926979
ZK6.11	1.5654	0.000947178		asb-1	1.72406	0.00944758	nhl-1	0.842265	0.178367	Y45F10D.6	1.22944	0.0287929
F45D3.4	2.34595	0.000947178		F48C1.9	1.72312	0.0310518	emb-9	0.841918	0.124472	nhr-134	1.22703	0.00318304
cpr-3	4.32337	0.000947178		rpl-7A	1.72284	0.00733021	F45E4.5	0.841673	0.223182	F20C5.4	1.22532	0.0659998
ech-9	2.16558	0.000947178		abcf-2	1.72208	0.0182266	F17C11.6	0.841572	0.124168	ZK1055.7	1.22346	0.0123042
K10D11.2	3.66942	0.00531842		alh-5	1.72116	0.0185086	Y34F4.5	0.840938	0.057645	F32A5.4	1.22282	0.00217445
dod-17	2.60534	0.000947178		F36A2.7	1.72054	0.00705361	F32A11.3	0.839838	0.132765	F53F8.4	1.22128	0.00522233
K10D11.6	2.40313	0.000947178		msp-50	1.7202	0.0223341	dpf-2	0.837882	0.132765	F13E9.15	1.21964	0.00247494
K10D11.5	1.89937	0.000947178		Y50D4A.5	1.71899	0.0223676	tth-1	0.837853	0.216692	nhr-195	1.21962	0.00222197
Y22D7AR.2	1.67589	0.000947178		his-60	1.71789	0.00587452	W03F9.4	0.836022	0.235488	flp-27	1.21758	0.00547009
clec-4	3.81931	0.000947178		rps-28	1.7176	0.0127021	ttr-32	0.835319	0.313797	twk-25	1.217	0.0027198
F55G11.4	2.99275	0.000947178		hex-1	1.71748	0.00649428	R06C1.6	0.834979	0.060671	zig-3	1.21564	0.00232372
F55G11.2	3.83239	0.000947178		ucr-2.3	1.71736	0.0065395	F53F10.1	0.831939	0.183813	lgc-22	1.21496	0.00729827
F55G11.8	3.29212	0.000947178		Y45F3A.9	1.71699	0.00909911	nspd-6	0.830647	0.100962	ptr-23	1.21218	0.00196177
F19C7.1	1.79987	0.000947178		cpg-2	1.71655	0.00615973	ctg-2	0.830005	0.0580005	F15A4.6	1.21071	0.00659857
F08G5.6	3.11357	0.000947178		F25H2.15	1.71645	0.00587452	W04B5.1	0.828787	0.122345	C05B5.9	1.21062	0.0045426
F53B2.8	4.17109	0.000947178		dhs-11	1.71583	0.0140961	tyr-4	0.823524	0.302678	acs-3	1.20958	0.00163385
clec-85	1.61804	0.000947178		gpdh-2	1.71553	0.0064623	nas-37	0.823227	0.111257	tag-38	1.20812	0.00709365
clec-173	1.43789	0.000947178		nasp-1	1.71536	0.005971	aqp-8	0.822677	0.0595672	T23F4.2	1.20737	0.00985474
C28G1.5	0.932643	0.0089721		R08C7.2	1.71382	0.00587452	fat-6	0.821564	0.0376988	F55H12.4	1.20495	0.00258492
F14F9.4	3.0666	0.000947178		Y62H9A.5	1.71372	0.00822324	unc-15	0.821384	0.0725967	bath-47	1.20268	0.0487141
F14F9.3	2.92036	0.00242805		skpt-1	1.7125	0.00792108	C06G8.1	0.821249	0.288729	R11F4.1	1.20259	0.00292086
C29F9.4	2.73249	0.000947178		Y73E7A.1	1.71226	0.00975321	C07A4.3	0.821096	0.0615764	Y73B6BL.35	1.20144	0.00252998
fbxa-60	2.25874	0.000947178		C05D11.5	1.71187	0.0489207	paf-2	0.819477	0.14321	mfb-1	1.19812	0.00229796
T24C4.8	3.85717	0.000947178		ssq-1	1.71148	0.033485	K10D11.2	0.818969	0.332773	F58F9.7	1.19746	0.0212737
T24C4.4	5.98957	0.000947178		rpl-43	1.71102	0.0109111	M03B6.5	0.817804	0.0662287	T18D3.7	1.1965	0.00183644
ugt-18	3.85342	0.000947178		tct-1	1.71079	0.0100037	alh-5	0.814848	0.0645481	fat-3	1.19573	0.0120481
E03H4.8	2.81582	0.000947178		aqp-1	1.71027	0.0130507	F53F8.4	0.81461	0.0557209	sptf-2	1.19497	0.00579985
C45B11.2	4.26986	0.000947178		spp-5	1.70989	0.00589707	nhr-42	0.813662	0.145452	clec-265	1.19455	0.0122822
fbxa-105	2.56899	0.000947178		syp-1	1.70975	0.00844607	nhr-32	0.812331	0.127981	F41E6.5	1.19414	0.00422169
oac-31	2.5227	0.000947178		rpl-4	1.70918	0.00825049	dct-14	0.811271	0.64085	srw-86	1.19187	0.00378945
C06B3.7	4.8657	0.000947178		ZK1320.9	1.70892	0.00987638	sss-1	0.810999	0.202854	Y39B6A.5	1.189	0.0108002
C32H11.4	5.20565	0.000947178		rpl-37	1.70848	0.00934789	cpna-1	0.810608	0.222032	F39G3.4	1.18664	0.00213509
C32H11.9	8.6181	0.000947178		K01G5.5	1.70832	0.0121964	unc-51	0.810134	0.241375	C44H9.6	1.18619	0.00818787
fbxa-190	1.55695	0.000947178		dhc-1	1.70752	0.00587452	ftn-2	0.810011	0.218413	lips-16	1.18599	0.00352028
F35E12.5	7.20965	0.000947178		D1054.11	1.70737	0.0178046	Y32F6A.4	0.809511	0.0659337	sulp-2	1.18477	0.00239724
F27E5.9	2.86442	0.000947178		ZK669.3	1.70697	0.00615973	fat-5	0.808925	0.200126	ZK1055.6	1.18397	0.00163385
K08D8.5	1.48247	0.000947178		rpl-24.2	1.70647	0.00726909	R13H9.5	0.806828	0.224468	C18E9.9	1.18362	0.00838147
ttm-4	0.913313	0.000947178		ssp-11	1.70581	0.0678415	T14E8.1	0.804836	0.145851	H40L08.2	1.1807	0.0404396
clec-41	2.17765	0.000947178		F19C6.2	1.70578	0.0339381	T23B3.5	0.803962	0.252175	C39H7.4	1.18049	0.0117392
nhr-112	2.42791	0.000947178		rpl-27	1.70565	0.0120011	C52E2.4	0.803574	0.112143	nspc-19	1.18042	0.00179853
B0024.4	6.92539	0.000947178		T01D3.5	1.70497	0.00834535	lips-16	0.802089	0.128871	fbxa-37	1.17886	0.00183644
W04B5.3	1.11905	0.000947178		R11H6.4	1.70452	0.0139847	gsp-3	0.801865	0.223773	B0281.3	1.1786	0.0069619
ets-9	1.33298	0.000947178		Y102A11A.3	1.70372	0.0182675	spp-18	0.799462	0.0509842	R03G8.3	1.1785	0.00141856
F16C3.2	1.74251	0.000947178		K10C8.3	1.70358	0.00625751	snb-2	0.799177	0.155853	ZK131.11	1.1782	0.00472402
spp-18	1.51865	0.000947178		Y54G2A.36	1.70353	0.00620405	dct-1	0.798255	0.134018	B0513.9	1.17795	0.00188811
Y43F8B.14	2.90321	0.000947178		F43H9.4	1.70347	0.0331221	clec-264	0.797619	0.161931	C11G10.1	1.17752	0.00172311
C49C3.9	3.25215	0.000947178		rpl-28	1.70347	0.00689489	ssq-2	0.797615	0.0912386	klf-3	1.17448	0.0140901
R02C2.7	1.89462	0.000947178		ZC513.7	1.70311	0.00615973	tab-1	0.7974	0.634155	sbt-1	1.17425	0.00426827
K06A4.7	1.2555	0.000947178		C04G2.8	1.70276	0.0921198	cyp-32A1	0.79681	0.25439	T06D8.1	1.17207	0.00352329
fbxa-19	1.36827	0.000947178		rpl-2	1.70268	0.0138935	spp-5	0.796783	0.0179193	ttr-20	1.17192	0.00921996
fbxa-80	1.75555	0.000947178		rpl-19	1.70242	0.00785136	C09D4.2	0.796157	0.0340369	H05L03.3	1.1719	0.00234089
H20E11.1	1.6175	0.000947178		C04G2.9	1.70164	0.0739603	C27A7.1	0.796009	0.143331	F13B6.1	1.1711	0.0105883
ttr-23	1.67035	0.000947178		dpy-17	1.70161	0.00587452	pqn-11	0.794865	0.701793	hsp-12.6	1.16981	0.00385938
fbxa-15	2.53779	0.00424549		sas-6	1.70118	0.00615973	lgc-28	0.794081	0.0592603	cyp-13A1	1.16974	0.00268871
fbxa-79	1.92235	0.000947178		VC5.2	1.70097	0.00861083	F13H10.6	0.793868	0.37112	myo-2	1.16955	0.0193009
Y82E9BL.18	2.26658	0.000947178		Y48A6B.9	1.70004	0.0397553	C33G8.2	0.792508	0.385638	nspc-16	1.16936	0.00326732
nhr-50	1.09433	0.00424549		F14D2.11	1.69998	0.0143678	faah-3	0.791876	0.0902766	pgp-14	1.16919	0.00397311
K11H12.4	3.48597	0.000947178		nhr-117	1.6998	0.0358818	prx-13	0.791791	0.104228	str-163	1.16829	0.00245626
K11H12.3	2.84199	0.000947178		rps-21	1.69975	0.0082568	gsp-4	0.791102	0.154816	C25E10.5	1.16629	0.00927343
best-5	2.20295	0.000947178		C17H12.8	1.699	0.0164326	sma-2	0.790935	0.177002	F16G10.15	1.16526	0.00546731
ZK896.3	1.56882	0.003081		F38A5.7	1.69742	0.00934789	C17B7.10	0.790305	0.117646	fbxa-150	1.16174	0.0314162
clec-186	1.52942	0.000947178		vit-5	1.69734	0.00685962	nhr-19	0.788095	0.0422627	skr-19	1.16067	0.00492953
ZK896.4	1.80594	0.000947178		bath-42	1.69679	0.011771	prx-5	0.786829	0.0887654	C29F3.7	1.16034	0.00572117
ugt-44	2.79487	0.000947178		pbs-3	1.69637	0.00587452	nspd-5	0.786334	0.325754	egl-15	1.16007	0.00183644
T23F4.2	1.23445	0.000947178		F26F4.8	1.69578	0.0114424	unc-54	0.785379	0.079203	Y22D7AR.6	1.15986	0.00163569
Y38H6C.9	2.73442	0.000947178		R53.5	1.69524	0.005971	ZK938.1	0.785361	0.135883	F09F9.1	1.15845	0.00341416
C17H12.6	5.53979	0.000947178		C32D5.8	1.6939	0.00587452	gln-2	0.784432	0.210276	C05D11.5	1.15561	0.0713188
C17H12.8	1.98345	0.000947178		rpl-20	1.69334	0.0117485	tcer-1	0.78362	0.523628	Y75B8A.28	1.14975	0.00189591
Y53C12B.7	2.16554	0.000947178		rps-3	1.69322	0.00702055	nape-1	0.781011	0.0821901	nhr-247	1.14851	0.00755302
cebp-1	1.71667	0.000947178		C42D8.1	1.6931	0.00819383	ceeh-2	0.780593	0.303651	nhr-184	1.14802	0.0101391
irg-2	3.63171	0.000947178		crn-2	1.69303	0.00655416	asp-1	0.778493	0.196453	Y60C6A.1	1.14778	0.00412214
C49G7.7	5.58938	0.000947178		C50F4.8	1.6926	0.0140866	R07B7.6	0.775324	0.153106	C38C3.4	1.14657	0.00218667
F53C11.1	2.1828	0.000947178		ctns-1	1.69221	0.00597749	B0513.9	0.774908	0.18127	nlp-21	1.14571	0.013596
C05B5.9	1.71929	0.0369752		eef-1A.1	1.69185	0.0173666	F08A7.1	0.774808	0.0371283	C32H11.3	1.14489	0.00978364
Y43C5A.3	1.52507	0.000947178		B0348.2	1.69174	0.23286	acdh-10	0.773118	0.0877175	fipr-5	1.14431	0.0313385
F13B6.1	0.540429	0.418581		frm-10	1.6906	0.00587452	cyp-33C4	0.771477	0.177362	nhr-178	1.14381	0.00228493
F54B8.4	3.50091	0.000947178		psf-1	1.69021	0.0110719	Y52E8A.4	0.770059	0.054442	Y41E3.5	1.1436	0.0108333
F35E12.4	5.44809	0.000947178		rpl-17	1.69014	0.00811005	C18H9.1	0.769926	0.490806	K07E1.1	1.14259	0.0215999
Y39A3A.4	2.78094	0.000947178		csn-5	1.68988	0.00625751	his-11	0.769053	0.0486131	R13D11.10	1.14034	0.0053134
C05C12.4	0.776006	0.0113518		lbp-7	1.68965	0.00741743	C29G2.6	0.767629	0.157212	flp-8	1.13968	0.00178777
W09G12.7	1.17361	0.00582928		F54D7.7	1.68918	0.00741109	F59A7.9	0.767535	0.118941	K07G5.5	1.13922	0.0138326
Y45G5AM.3	1.40147	0.000947178		apl-1	1.68852	0.00599954	C25F9.11	0.766771	0.16959	fbxa-143	1.13751	0.00198506
clec-71	2.70286	0.000947178		msp-38	1.68831	0.0433336	nspd-4	0.766582	0.236714	K09C4.1	1.1366	0.00760969
Y38C1AA.6	1.4624	0.000947178		Y75B8A.31	1.68752	0.0122535	Y57A10A.26	0.766132	0.163378	F58A3.3	1.13379	0.00362457
C18H7.11	4.01765	0.000947178		rpl-11.1	1.68717	0.00729605	Y69A2AR.7	0.765857	0.194016	gstk-2	1.13136	0.00352329
clec-63	2.02431	0.000947178		rps-26	1.68702	0.00925715	Y57G11C.46	0.764887	0.218387	math-38	1.13044	0.031821
F08G2.5	3.93366	0.000947178		tre-3	1.68695	0.0106557	K05F6.10	0.76399	0.163529	F09E5.14	1.12852	0.00602388
F33H12.7	6.65898	0.000947178		mdt-28	1.68647	0.00587452	C50D2.1	0.76289	0.152161	M60.7	1.1279	0.00307425
nhr-63	1.56108	0.000947178		Y17D7B.4	1.68624	0.0277893	C27B7.7	0.762858	0.185134	W02F12.2	1.12716	0.00199445
F54H5.2	1.98564	0.00172993		ubl-1	1.68616	0.00884927	T10E9.4	0.761769	0.296121	F43H9.4	1.1264	0.00596684
T25D10.1	1.02261	0.00366533		ZK484.5	1.68609	0.0441587	fbxa-91	0.759671	0.0955815	nmgp-1	1.12597	0.00296135
F46G10.4	1.125	0.000947178		H22K11.2	1.68556	0.00895447	Y38C1AA.7	0.75897	0.197812	Y54G2A.49	1.12538	0.033726
fil-1	2.03329	0.000947178		vit-2	1.68534	0.00769922	F41G3.10	0.758692	0.0997797	K06G5.1	1.12372	0.00751906
ZK418.7	1.57332	0.000947178		rps-11	1.68534	0.00795637	clp-4	0.755496	0.200175	nspc-20	1.12133	0.00719311
M02H5.8	2.10455	0.000947178		snr-6	1.6849	0.00709431	fbxa-108	0.754995	0.0837465	exc-5	1.12072	0.0165467
nhr-98	1.13278	0.012065		eef-1G	1.68422	0.012991	csq-1	0.754557	0.22432	C28G1.5	1.11556	0.00389739
nhr-203	0.681187	0.0719486		iff-1	1.68403	0.00760711	T03F7.7	0.752939	0.334631	C02F4.4	1.11515	0.00296934
C51E3.10	2.69597	0.000947178		Y45G5AM.9	1.68398	0.005971	F07C3.9	0.751883	0.188036	R02D5.7	1.11492	0.00390245
VZK822L.2	1.68297	0.0124694		ttr-34	1.68259	0.0137983	twk-25	0.751777	0.0592401	math-24	1.11468	0.00744985
H02F09.3	3.63613	0.000947178		Y82E9BR.3	1.68112	0.00907139	T22C8.6	0.75164	0.0615764	C02F12.3	1.11389	0.00189777
pme-4	2.21655	0.000947178		C01B10.6	1.68093	0.00587452	nhr-18	0.750798	0.0960754	C25E10.4	1.11383	0.00371823
gst-22	2.09515	0.000947178		mlc-4	1.67995	0.00587452	Y87G2A.16	0.748603	0.0383832	F43G6.8	1.11349	0.0141852
fbxa-18	4.37123	0.0124694		F32D8.12	1.67989	0.00781958	aat-6	0.748281	0.101552	C30E1.9	1.11247	0.00290227
fbxa-88	3.71164	0.000947178		rps-8	1.67972	0.00717739	cpt-1	0.746819	0.247144	F48E3.8	1.10927	0.00228493
srj-29	4.5813	0.0506355		C25F9.11	1.67965	0.24552	C05D11.5	0.746791	0.116455	R102.2	1.10715	0.0139057
cdr-4	2.26486	0.000947178		fkb-6	1.67831	0.00637749	ssq-1	0.74639	0.0486758	cyp-34A7	1.10682	0.00352374
clec-174	5.86988	0.000947178		rpl-24.1	1.67734	0.00639743	nhr-110	0.744912	0.109167	Y57G11C.40	1.10631	0.00982468
nspc-16	1.27987	0.00815658		rpl-7	1.67724	0.00625765	clec-50	0.7437	0.12258	dod-17	1.1047	0.00694131
gst-14	2.77112	0.000947178		mesp-1	1.67684	0.00674286	nex-2	0.741461	0.358552	F08B12.4	1.10115	0.00294529
ZK1055.7	1.23781	0.000947178		rps-12	1.67672	0.00689753	Y105C5A.8	0.740907	0.31261	F46G10.2	1.10071	0.00296187
T23E7.6	4.47568	0.000947178		Y53F4B.4	1.67557	0.0125467	bath-47	0.740328	0.270447	Y53H1B.2	1.09992	0.00830932
C01G10.17	4.9854	0.161143		Y25C1A.13	1.67545	0.00770906	Y51H4A.5	0.740123	0.0423551	far-3	1.09958	0.0323793
H06I04.6	1.57906	0.000947178		Y110A7A.7	1.67537	0.00960464	tbc-6	0.73945	0.0912386	Y40B10A.6	1.09949	0.0496917
ZK856.5	0.966203	0.0520016		rhi-1	1.67533	0.0103344	Y22D7AR.6	0.738856	0.13997	F16B4.4	1.09817	0.00393111
F14F9.6	3.25218	0.343816		cey-4	1.67497	0.00825143	K10B3.6	0.7387	0.201406	ikb-1	1.09728	0.0595879
cyp-35A3	2.02155	0.000947178		ife-1	1.67463	0.00993524	sbt-1	0.738331	0.140269	elt-7	1.09692	0.00419258
R08E3.2	1.53023	0.000947178		mxl-2	1.67403	0.00625751	F42G4.5	0.738179	0.0450531	T23F2.4	1.09332	0.0177087
F47B8.10	1.39642	0.00934658		rps-25	1.67291	0.00702285	acl-12	0.737934	0.055908	T12A7.6	1.09135	0.00183644
bcmo-2	1.49933	0.000947178		acdh-7	1.67234	0.00599954	B0564.3	0.736695	0.10615	M163.1	1.09075	0.00352329
clec-2	5.45464	0.517211		ZC581.3	1.67216	0.00736223	F49D11.6	0.735613	0.620951	K08D8.6	1.0894	0.00639926
clec-209	0.845514	0.237407		C37H5.6	1.67195	0.00741743	btb-9	0.735586	0.144003	F26G1.2	1.08857	0.00332343
T16G1.4	1.50116	0.000947178		C09B9.1	1.67132	0.00850964	nhr-90	0.73552	0.0771126	W06G6.11	1.08728	0.00764833
fbxa-87	2.03375	0.000947178		ubq-2	1.67097	0.0108756	cyn-2	0.735452	0.0624691	C05B5.2	1.08577	0.00593996
ins-19	5.33523	0.211883		T27F2.4	1.67063	0.377443	ubh-1	0.735328	0.0633082	ZK899.1	1.08571	0.00384452
pqn-60	1.12112	0.0077245		rps-5	1.67028	0.0196719	F10E9.12	0.733394	0.566094	C18H9.6	1.0853	0.0196094
zip-5	1.63774	0.000947178		spp-10	1.66986	0.00699986	str-163	0.733226	0.150523	C10C5.4	1.08439	0.010293
linc-37	5.71022	0.211883		C10G8.4	1.66964	0.00883126	Y54G2A.49	0.732194	0.388614	F42C5.4	1.08379	0.00235741
ver-2	1.30877	0.00815658		taf-5	1.6696	0.0133418	M176.8	0.731848	0.280891	Y58A7A.5	1.08166	0.00665428
ZC328.3	1.71878	0.0089721		aipl-1	1.66951	0.0101694	K03D7.9	0.731709	0.735041	lin-1	1.08157	0.00346401
F52E1.14	0.721532	0.0264268		C56A3.6	1.66943	0.00939257	Y58A7A.3	0.73064	0.438368	C52E2.4	1.08137	0.00184027
ttr-21	0.824277	0.0113518		ZK632.10	1.66896	0.00602524	flp-18	0.730191	0.118941	Y45G5AM.3	1.07866	0.00268059
tpra-1	1.73649	0.00480729		F18C5.10	1.66817	0.00587452	itx-1	0.729748	0.280363	syx-2	1.07855	0.0039234
C53B7.3	1.35359	0.000947178		F23C8.6	1.66784	0.00587452	F56D2.5	0.72968	0.347444	fil-1	1.07836	0.00483019
C18C4.5	0.982962	0.000947178		D1054.10	1.66779	0.0131424	gtl-1	0.729564	0.111042	F46E10.11	1.07718	0.00321649
lipl-2	2.10991	0.000947178		spp-23	1.66742	0.0785716	F11A5.15	0.726264	0.210812	nhr-103	1.07598	0.00179853
W02G9.4	1.81223	0.000947178		msp-63	1.66737	0.0489507	F36A2.3	0.725911	0.144319	fut-2	1.07588	0.0058451
cyp-13A10	0.772203	0.0789069		sod-4	1.66733	0.00966648	C41G11.1	0.724036	0.244424	F09F7.5	1.07441	0.00252953
gstk-1	0.569102	0.0630362		ZK632.9	1.66725	0.00587452	Y47D3A.32	0.7239	0.144784	ttr-54	1.07383	0.00248121
gst-20	1.23608	0.000947178		elpc-4	1.66725	0.00758846	F59A7.7	0.723127	0.206163	pdf-1	1.0736	0.00226788
F19B10.13	1.99101	0.00480729		rps-18	1.66718	0.00772688	R05H10.1	0.721538	0.176443	vglu-2	1.06959	0.00289695
ZK1320.2	0.983334	0.000947178		F21F3.6	1.66717	0.00701095	D1086.12	0.719852	0.0961197	F58E6.7	1.06884	0.0515107
R09E12.9	1.24883	0.00856701		immt-2	1.6664	0.00809403	ptr-3	0.719172	0.178921	nhr-98	1.06811	0.00312603
F52H2.3	1.12739	0.00424549		trx-3	1.6649	0.131486	math-45	0.717491	0.130587	C49C8.5	1.06752	0.0188674
F20C5.4	1.22836	0.000947178		smg-8	1.6648	0.0065395	pgal-1	0.717369	0.0615961	Y71G12B.2	1.06628	0.00344337
dct-17	6.11243	0.000947178		F53F4.10	1.66478	0.00807258	C32D5.12	0.716474	0.0964783	ZC443.1	1.06614	0.0146607
F59C6.11	1.09862	0.000947178		M01F1.3	1.66377	0.00852457	Y119D3B.13	0.716143	0.0889686	fbxa-46	1.06576	0.014101
C17F4.7	0.939017	0.0299517		gln-6	1.66366	0.00622731	fbxa-46	0.715925	0.146455	K11D12.9	1.06516	0.0023938
fbxa-29	1.51474	0.000947178		rps-16	1.66365	0.00726615	cdh-5	0.714976	0.157398	ZK550.2	1.06459	0.00268894
nep-14	1.92982	0.000947178		rpl-36	1.66325	0.0137509	Y50D4A.5	0.713761	0.071913	F11A5.15	1.06444	0.00481301
nlp-39	4.25878	0.000947178		pdr-1	1.66324	0.00786121	C07E3.3	0.713388	0.452279	asp-6	1.06426	0.0154308
Y47H9C.1	4.01251	0.000947178		rps-14	1.66322	0.00650764	nhr-103	0.712985	0.136803	C27B7.7	1.06313	0.00181326
gst-38	6.06403	0.000947178		msp-33	1.66167	0.0478305	H32K16.2	0.712325	0.103362	pho-4	1.06137	0.00304755
ZK863.8	1.04151	0.000947178		K07C5.4	1.66155	0.00786121	C29F7.2	0.711649	0.453914	nhr-57	1.06081	0.00350683
F56D5.3	1.68252	0.000947178		gstk-1	1.66153	0.0152234	B0303.11	0.711028	0.342681	lact-2	1.05618	0.00211195
F48C1.9	2.2961	0.000947178		Y97E10AL.2	1.6613	0.00766274	T04F8.8	0.708533	0.234594	F17C11.2	1.05539	0.00593822
aman-3	1.50978	0.000947178		C42C1.10	1.66128	0.00744351	T23G11.1	0.707301	0.386279	C27A7.8	1.05442	0.00227565
C50B8.5	1.17674	0.00582928		C05D11.1	1.66123	0.010458	F16G10.15	0.706897	0.0676911	F42C5.10	1.05286	0.00389599
ugt-54	1.58955	0.000947178		K07H8.10	1.66121	0.00817388	C24A11.1	0.706362	0.227599	asm-1	1.05282	0.00162144
cyp-32B1	1.62028	0.000947178		C47D12.5	1.66107	0.029255	F09F9.1	0.706248	0.156386	T01G6.10	1.05224	0.00794548
nhr-232	1.52013	0.000947178		acdh-11	1.661	0.00771164	F45E10.2	0.705926	0.08822	fipr-4	1.04791	0.011343
hex-2	1.16678	0.000947178		C56A3.8	1.66081	0.00661801	lec-11	0.705723	0.0806172	nhr-90	1.04756	0.00743954
snb-2	1.56986	0.000947178		C18A11.1	1.66077	0.00690932	ssp-11	0.704822	0.269295	kgb-1	1.04687	0.00610322
F14B8.6	1.16304	0.000947178		T27A3.4	1.65976	0.0704756	C18E9.9	0.704405	0.219937	snb-2	1.04529	0.0129235
dod-21	9.46772	0.000947178		puf-11	1.65943	0.00587452	C15C6.2	0.702946	0.232597	tag-253	1.04286	0.00596778
ZK6.8	1.16539	0.0117037		C13B4.1	1.65912	0.00655416	W01B11.6	0.701152	0.248433	arrd-24	1.04071	0.00388943
C28G1.6	1.16888	0.00424549		C06B3.7	1.65875	0.307067	C33H5.13	0.700535	0.256027	ZK287.9	1.04059	0.00348601
K05F1.1	1.63359	0.0077245		ant-1.1	1.65858	0.00701685	Y66D12A.13	0.70046	0.0924861	Y57G11C.46	1.04052	0.123493
clec-3	3.18722	0.000947178		ngp-1	1.65707	0.0157751	nhr-35	0.70009	0.118719	C32H11.4	1.04036	0.0168022
F15E11.12	2.25574	0.000947178		mel-47	1.65675	0.00692672	asns-2	0.699267	0.0912437	W05H9.3	1.03989	0.00384156
math-27	1.40097	0.003081		R53.1	1.65617	0.0105642	clec-145	0.699157	0.157653	Y75B8A.4	1.03845	0.0772478
C08E8.2	12.3987	0.000947178		rla-0	1.65541	0.00790977	R09E10.6	0.696928	0.342258	T03F7.7	1.03755	0.00673465
C18E9.9	1.53	0.000947178		F28H7.3	1.65514	0.00811746	R10D12.1	0.696704	0.0792436	daf-14	1.03709	0.00176919
Y77E11A.2	0.972085	0.00172993		rme-2	1.65457	0.00737104	skr-3	0.696476	0.0806172	inx-15	1.03602	0.00527629
ZC247.1	0.997103	0.00172993		R02F2.1	1.65403	0.00979611	K08C9.2	0.69569	0.260454	R06C1.6	1.03559	0.00196671
fipr-2	0.781672	0.00582928		Y7A9C.11	1.654	0.0655297	ugt-44	0.695598	0.540561	Y42G9A.1	1.03478	0.0106633
sodh-2	1.77049	0.0209846		csq-1	1.65359	0.00599954	Y71H2AL.1	0.695101	0.2632	fbxa-23	1.0345	0.00545247
scav-1	0.706383	0.0163375		inx-8	1.65294	0.00599954	M7.8	0.693221	0.126016	fbxa-59	1.03449	0.0372389
Y51A2D.13	1.79212	0.000947178		aly-3	1.65287	0.00625113	clec-243	0.691531	0.589959	ZK822.4	1.03346	0.0162221
nfm-1	1.01475	0.000947178		F15D4.2	1.65273	0.00786121	ant-1.3	0.691196	0.144784	cnc-8	1.03238	0.0291477
LLC1.2	0.910445	0.000947178		gyg-2	1.65257	0.00620405	str-176	0.690941	0.530263	nspc-14	1.03176	0.00487432
pqn-62	0.860423	0.00815658		Y54H5A.2	1.65218	0.015754	dhs-21	0.690922	0.0616793	T22C8.6	1.03162	0.0017339
C25H3.10	1.16993	0.000947178		W02F12.5	1.6518	0.00852457	nhr-101	0.690196	0.145835	F42G2.2	1.03048	0.00653934
far-7	1.30083	0.000947178		mlh-1	1.65139	0.0119464	T08B6.4	0.68959	0.400136	C04G6.5	1.03022	0.00376901
F49F1.5	2.57124	0.000947178		htz-1	1.6508	0.005971	lys-3	0.689308	0.675999	C54C6.7	1.02999	0.00211914
ccf-1	2.06828	0.00424549		F20A1.9	1.65043	0.0215279	oac-46	0.689121	0.0905862	W03F8.6	1.02881	0.00254912
F56A4.2	0.797878	0.0332989		col-63	1.64979	0.00712495	F56C11.6	0.689024	0.611997	C10C5.5	1.02874	0.00663689
C56G3.2	1.05269	1		lbp-9	1.64884	0.00864735	Y38F1A.1	0.688251	0.104497	Y39B6A.23	1.02837	0.0104658
Y73F4A.2	1.27994	0.000947178		msp-40	1.64828	0.0343265	C29F9.4	0.687985	0.540259	nspc-9	1.02694	0.0100842
F55H12.3	1.01259	0.000947178		F07E5.5	1.64759	0.0090535	F52D1.2	0.687741	0.130781	F47E1.4	1.02643	0.00422704
gba-2	1.65517	0.00531842		W09C3.7	1.64702	0.0326092	E04F6.8	0.687216	0.0700353	Y110A7A.21	1.02395	0.00355846
Y54G2A.45	0.912685	0.000947178		F25H2.5	1.64666	0.0102119	coel-1	0.687012	0.287061	Y44A6C.1	1.02357	0.00179853
fbxa-34	1.39269	0.0077245		rfl-1	1.64646	0.00643131	apl-1	0.686999	0.198265	fbxa-99	1.02311	0.004798
R08E3.1	1.54693	0.00172993		prdx-3	1.64638	0.00774213	F42G8.8	0.686704	0.306743	itx-1	1.01946	0.0114417
T20B3.1	0.749183	0.0335363		ubq-1	1.64601	0.00587452	sams-5	0.685914	0.353172	fbxa-69	1.01923	0.00177356
ttm-5	1.07913	0.000947178		ZC373.2	1.64567	0.0182992	sma-5	0.685707	0.0727087	F53F10.1	1.01674	0.0051797
H20E11.2	2.04007	0.0131851		C08F11.11	1.64563	0.005971	F53B6.4	0.684686	0.21144	nhr-214	1.01605	0.343059
Y51F10.7	1.46657	0.000947178		ZK1320.3	1.64543	0.00587452	C45B2.8	0.682358	0.227371	oac-57	1.01603	0.0193181
M04C3.1	1.45294	0.000947178		Y41G9A.10	1.64521	0.00650824	W02D7.8	0.6816	0.0726536	R09B5.11	1.01547	0.00697594
M04C3.1	2.5924	0.000947178		hip-1	1.64517	0.00626832	daao-1	0.681339	0.149696	Y48A6B.9	1.0148	0.0112148
spp-2	2.31793	0.000947178		B0035.18	1.6449	0.00770906	col-129	0.681322	0.563752	vap-1	1.01176	0.00466752
gst-5	3.0818	0.000947178		T27F7.1	1.64472	0.00631126	nhr-179	0.68003	0.0573654	F45D3.3	1.01109	0.00308447
gst-40	1.49069	0.000947178		Y49A3A.3	1.6443	0.0142488	C50E10.1	0.678123	0.16959	T04C12.3	1.01015	0.00570029
stdh-2	4.35644	0.000947178		K02B7.3	1.64387	0.00780645	F41G3.18	0.677918	0.0671524	cpr-4	1.00881	0.0280521
D1053.3	1.33508	0.000947178		msp-64	1.64346	0.0655074	F48G7.12	0.677091	0.34775	Y54G2A.46	1.00817	0.00429443
gst-39	0.989474	0.00366533		Y54H5A.1	1.64288	0.0103592	R07B7.5	0.676391	0.0595672	C07A9.8	1.00649	0.00545944
gst-31	2.79514	0.000947178		ekl-1	1.64274	0.00623106	Y69E1A.1	0.675846	0.225463	F56D6.8	1.005	0.0130498
Y32F6A.4	1.01121	0.000947178		F21C10.4	1.64236	0.327426	clec-150	0.675822	0.153667	C07H4.1	1.00388	0.0114757
ZK1025.3	2.90567	0.00815658		cpt-1	1.64178	0.0134742	R10E9.2	0.67514	0.303355	pes-4	1.00331	0.00511194
spp-8	1.2108	0.000947178		psd-1	1.64113	0.00587452	ZC412.10	0.675129	0.0489217	C05B5.5	1.00158	0.00821636
linc-162	13.1034	0.000947178		gln-5	1.64094	0.005971	ZC477.7	0.675004	0.356216	nhr-96	1.00086	0.0141467
ugt-35	3.95466	1		eef-1B.2	1.64072	0.0086626	Y106G6H.4	0.673747	0.144175	R102.1	1.00043	0.00249214
cyp-13A5	3.63332	0.000947178		C18F10.7	1.64054	0.00599954	C26E1.3	0.673317	0.135945	nhr-6	0.999942	0.0322282
cyp-13A6	1.89246	0.000947178		ads-1	1.6405	0.0166849	F45H7.6	0.673149	0.244177	tag-209	0.999757	0.0610189
obr-3	1.6488	0.0089721		trx-2	1.64024	0.00781866	col-135	0.671803	0.0645481	nhr-131	0.997574	0.00535589
clec-9	13.4162	0.000947178		ced-6	1.64001	0.00690932	F32A5.4	0.671009	0.227778	crm-1	0.997335	0.0147943
cyp-14A5	0.798637	0.0077245		Y66H1A.5	1.6396	0.00826326	lgg-2	0.67089	0.0420641	cal-1	0.997062	0.00296135
T22F3.8	1.57427	0.0089721		F10G8.6	1.63947	0.014186	F07F6.8	0.670071	0.0572428	H32K16.2	0.996609	0.00221224
K06A9.1	1.81641	0.00242805		F32A11.3	1.6391	0.13274	tnc-2	0.669961	0.0688199	D1046.5	0.995758	0.00610425
K06A9.1	1.27174	0.003081		atp-3	1.63878	0.00890359	F47E1.4	0.668496	0.353986	nlp-10	0.993426	0.0510103
fhod-1	0.883096	0.000947178		lbp-1	1.63827	0.00587452	ptr-23	0.66823	0.143157	Y38F1A.8	0.991594	0.00329345
ifc-2	1.21114	0.00172993		C17E4.11	1.63797	0.016072	ZK945.7	0.666757	0.37158	srh-49	0.990696	0.495988
B0302.5	0.919984	0.003081		B0361.8	1.63768	0.0105121	Y50E8A.1	0.665606	0.180068	F36D1.7	0.98994	0.0125148
pqn-97	3.80703	0.117209		F30A10.9	1.63766	0.0136183	F54D1.6	0.664922	0.212997	prx-11	0.986543	0.0890832
F48G7.5	1.05187	0.0640528		Y69A2AR.32	1.63704	0.00825507	T24C2.5	0.664556	0.0486131	cpr-1	0.986457	0.0178729
K04F1.9	1.23828	0.00582928		C44B12.1	1.63687	0.00822273	zig-3	0.664017	0.212342	thn-1	0.984665	0.0198074
F35E12.6	2.43462	0.000947178		Y102A5C.2	1.63675	0.00952563	B0554.4	0.663901	0.69197	ncr-1	0.98439	0.00411156
arl-7	2.51287	0.003081		ZK512.2	1.63668	0.0200431	mak-2	0.663888	0.0792436	D2007.1	0.984382	0.00199445
Y51H4A.25	2.49988	0.000947178		ima-2	1.63661	0.00679395	nhr-80	0.663844	0.286168	K10B4.3	0.983809	0.0230734
math-26	0.809627	0.0089721		vit-6	1.63643	0.00625751	C10G11.8	0.663589	0.265457	vhp-1	0.983509	0.0461817
F27E11.1	1.48595	0.00424549		rpl-23	1.63634	0.00656333	K11E4.2	0.663106	0.0592401	scl-3	0.983493	0.00352329
R07B7.6	1.54504	0.000947178		npl-4.1	1.63583	0.00649428	msp-63	0.663051	0.16377	C25E10.12	0.981271	0.00885271
lbp-7	1.42147	0.000947178		K08E3.10	1.63544	0.0104237	col-104	0.662385	0.0305424	nhr-212	0.981083	0.00273221
fbxa-161	13.4196	0.000947178		rpl-31	1.63535	0.00674585	F47B8.3	0.662151	0.125952	dct-17	0.97979	0.0359724
C12D12.1	2.12933	0.000947178		cyn-1	1.63512	0.0111165	F46C3.6	0.660999	0.0900712	F26A3.4	0.979138	0.0226537
C12D12.1	1.58975	0.00728876		E04D5.1	1.63444	0.005971	glct-6	0.660282	0.166883	lec-7	0.977796	0.00359973
clec-68	5.26259	0.517211		C44E4.4	1.6338	0.00655416	frm-7	0.65922	0.276895	C48B4.1	0.977121	0.255745
B0563.5	1.49713	0.0149404		egl-45	1.63334	0.00930749	ZK1307.1	0.658782	0.125476	F37C12.10	0.977107	0.00342141
cyp-35D1	3.00727	0.000947178		Y94H6A.10	1.63312	0.0417705	tmem-135	0.658337	0.0551205	C05C12.4	0.976332	0.00883257
F14H3.12	1.35814	0.00172993		C39D10.7	1.63198	0.00650764	T28A11.20	0.657794	0.100877	mpk-2	0.975862	0.0110509
C29F7.2	1.04964	0.000947178		cct-4	1.63158	0.00710748	ZK596.1	0.657605	0.0645481	F22B7.9	0.975377	0.00315654
col-135	1.3669	0.000947178		rpl-21	1.63126	0.00710748	ugt-31	0.657331	0.0810828	nekl-2	0.97478	0.0161625
clec-17	1.97068	0.000947178		Y106G6D.8	1.63089	0.0140708	fbxa-140	0.657232	0.200126	T07G12.5	0.973678	0.00331772
M01G12.9	2.32338	0.000947178		crn-1	1.63076	0.00671342	fat-4	0.656983	0.103362	T11B7.5	0.973168	0.00631912
C41G7.8	2.30527	0.000947178		F10B5.2	1.63034	0.0121204	C42D8.1	0.656687	0.299131	oig-4	0.972953	0.00198506
F47B8.4	3.57514	0.000947178		rfc-1	1.63013	0.00826276	K08E3.10	0.655831	0.102514	T10B10.8	0.972406	0.00442054
T07G12.5	2.46656	0.00172993		F27C1.2	1.63009	0.00744695	F32H2.7	0.654416	0.238384	B0303.11	0.970949	0.00286855
F13E6.4	0.87993	0.00531842		par-5	1.62999	0.00652923	nspd-7	0.653125	0.173913	moe-3	0.969533	0.00234878
F35E12.9	2.19705	0.52073		K08D12.6	1.62785	0.00643131	ceh-37	0.65299	0.0727087	ceh-37	0.968883	0.00584225
fbxa-163	4.95118	0.00242805		nape-2	1.62719	0.0355815	T21H3.1	0.652952	0.0419064	pin-2	0.968636	0.00358548
nhr-237	1.2514	0.00934658		Y45F10B.3	1.62698	0.0111897	F21H7.5	0.652911	0.206163	F59C6.14	0.96838	0.00558478
pgp-1	1.08916	0.000947178		C41G7.9	1.62636	0.00867465	msp-32	0.652775	0.202261	F45E10.2	0.967899	0.00379532
F28F5.6	1.47924	0.000947178		vha-6	1.62575	0.0124139	ifb-2	0.652426	0.133461	M01H9.4	0.967156	0.00259852
Y54G2A.52	1.40059	0.000947178		clec-49	1.62562	0.0276621	Y38F1A.8	0.652184	0.236259	srp-2	0.964722	0.0236232
F01D5.2	3.28696	0.000947178		sars-1	1.62541	0.0104611	ZK546.3	0.650766	0.30847	F41G3.18	0.96444	0.00637141
F01D5.3	1.99288	0.000947178		eef-1B.1	1.62469	0.00626832	let-2	0.650489	0.225547	nas-11	0.964182	0.00670345
F46B3.1	0.722536	1		dars-1	1.62462	0.00838544	dur-1	0.650473	0.32689	M176.8	0.962831	0.00256385
B0403.3	1.29206	0.00531842		acl-14	1.62354	0.00599954	Y53G8AR.7	0.648768	0.321318	ugt-44	0.961497	0.0122117
nspe-2	1.52367	0.017027		C41G7.6	1.62351	0.0240805	ZK822.2	0.648518	0.139083	tyr-5	0.960812	0.0178662
F54C9.3	1.35915	0.000947178		Y40B1B.7	1.62228	0.0191642	R09B5.11	0.648174	0.247232	ghi-1	0.95629	0.007215
oac-57	2.70841	0.000947178		cdc-48.2	1.62204	0.00587452	Y20C6A.4	0.647173	0.145452	F35E12.10	0.955871	0.16797
clc-1	2.6096	0.00632705		klp-16	1.62201	0.00615973	F17C11.2	0.645476	0.0938236	Y110A2AL.9	0.954558	0.00697009
C45E5.4	0.514972	0.189374		Y65B4BR.5	1.6218	0.0149044	W02D7.11	0.645342	0.304902	C28G1.6	0.954318	0.0170317
tag-199	0.99575	0.00366533		Y37E3.11	1.62049	0.00786121	M60.7	0.644984	0.164728	nspc-7	0.954245	0.0135319
cyp-34A2	0.84101	0.0559495		puf-3	1.62046	0.00625751	grsp-2	0.644675	0.394665	F13E9.14	0.953351	0.0151785
rrn-3.56	2.8094	0.000947178		Y48G8AL.15	1.61988	0.0199764	F48E3.8	0.64457	0.171628	K04F1.9	0.952769	0.0123221
rrn-2.1	1.14499	0.000947178		K08F11.6	1.61968	0.00826302	nuc-1	0.644476	0.21597	K02A11.3	0.952524	0.00565051
mpk-2	2.77439	0.000947178		pas-3	1.61936	0.00726651	Y51B9A.9	0.644256	0.560875	glo-3	0.952046	0.00211701
F55G11.6	13.9846	0.000947178		F59B2.3	1.61919	0.0077495	W02D9.5	0.643993	0.151476	fbxa-55	0.949114	0.00227766
crp-1	1.52895	0.003081		cap-1	1.61867	0.00643863	egl-3	0.642637	0.156437	wht-1	0.949087	0.00331772
dct-17	5.02835	0.000947178		fbxa-122	1.61839	0.0129656	ttr-23	0.642573	0.172352	F08G5.3	0.948566	0.0033945
dct-17	6.45035	0.000947178		Y47H9C.14	1.6178	0.0131608	gstk-2	0.642295	0.276895	H14E04.1	0.947311	0.00350278
gst-13	1.05234	0.000947178		nhr-90	1.61735	0.00639743	gem-4	0.641701	0.287023	B0238.1	0.947082	0.00212849
C35B8.4	1.13164	0.000947178		Y17G7B.10	1.61727	0.00671342	rfs-1	0.641435	0.322539	M01G12.9	0.945955	0.00522072
C54C6.7	1.78966	0.000947178		Y66H1A.4	1.61725	0.0187626	C14C6.2	0.641339	0.162207	K08D9.4	0.945216	0.0436145
K09C4.1	1.83721	0.000947178		ubxn-6	1.61704	0.0140648	mca-1	0.641029	0.0895384	Y106G6D.6	0.944948	0.00461622
pgp-7	5.73465	0.00480729		rnr-1	1.61676	0.00928899	kel-1	0.639854	0.237297	C34D1.4	0.944497	0.00398583
nhr-99	1.65197	0.000947178		acs-19	1.6166	0.00587452	acox-1	0.639627	0.0895936	R13H4.5	0.94348	0.00851052
cyp-35A2	1.43427	0.000947178		JC8.2	1.61647	0.00839039	F52H3.6	0.639222	0.203218	nhr-193	0.943031	0.00717759
cyp-35A1	2.70261	0.0982762		ZK484.1	1.61633	0.0086626	K08B5.2	0.638411	0.277053	ttr-33	0.942601	0.0294318
R02D5.3	2.82168	0.000947178		R12E2.13	1.61532	0.00794642	E04D5.4	0.638303	0.125473	grsp-2	0.942295	0.00397704
nape-1	1.42761	0.000947178		C35D10.17	1.61528	0.00981549	Y71F9B.9	0.638221	0.292853	K02G10.1	0.94204	0.00229635
C39H7.4	1.00096	0.000947178		srp-7	1.61515	0.00587452	ttr-26	0.636741	0.58368	C16B8.3	0.941241	0.0157557
ubc-8	0.890528	0.0077245		his-68	1.61488	0.00708669	W06B4.2	0.63629	0.0548751	F21F8.4	0.938591	0.0333374
Y40B10B.1	1.71247	0.0135284		H01G02.1	1.6148	0.00587452	mec-17	0.635841	0.08627	F14B8.6	0.938557	0.00835436
C07D8.5	13.0265	0.000947178		his-67	1.6146	0.00587452	F42C5.4	0.635357	0.114589	M03B6.5	0.938533	0.00299161
C07D8.2	3.38883	1		rps-4	1.61435	0.00639743	C09D4.1	0.635113	0.121179	Y71G12B.5	0.9363	0.471631
oac-32	3.67696	0.000947178		pyp-1	1.61429	0.00766804	ZK1290.5	0.635006	0.287487	W01B11.6	0.935306	0.00803238
cyp-35C1	0.777609	0.00632705		F22D6.9	1.61411	0.0161557	tax-6	0.634876	0.104207	C44E12.1	0.93484	0.00619174
mtl-1	1.96563	0.000947178		C44B12.5	1.61391	0.00587452	F32H5.3	0.633209	0.0779204	cyp-13A10	0.93304	0.00411979
Y54E2A.4	0.84957	0.000947178		gln-3	1.61361	0.016785	clec-123	0.632188	0.273407	F47B8.8	0.93291	0.00189591
asah-1	1.13443	0.000947178		T08B2.12	1.61236	0.111222	fipr-7	0.631159	0.330307	acs-7	0.93282	0.0506083
W08E12.3	1.3616	0.00366533		F45G2.7	1.61221	0.0101497	C39H7.4	0.630739	0.0459023	F13H6.1	0.931404	0.00649408
C32H11.3	2.63024	0.003081		hyl-1	1.61163	0.0186804	Y46G5A.20	0.630621	0.189446	clec-84	0.929802	0.00346303
srz-15	11.8557	1		F28H1.1	1.61149	0.0434429	flp-14	0.629814	0.132241	F38B7.2	0.929256	0.00343014
crn-2	2.34086	0.000947178		F25H2.12	1.61138	0.02125	D1086.7	0.628801	0.10809	F28E10.5	0.928445	0.00420748
itx-1	0.839159	0.000947178		F48G7.12	1.61098	0.0424305	cdf-2	0.628336	0.222044	cyp-33C5	0.927702	0.00432336
Y19D10A.12	7.95747	1		C16C10.4	1.61051	0.00758699	F15G9.1	0.628307	0.188163	sptf-1	0.926762	0.0026044
nit-1	1.81727	0.000947178		T27E4.7	1.60998	0.0138019	F47B8.4	0.628222	0.266866	F43C9.2	0.923394	0.00776749
F27E5.1	1.65264	0.000947178		C35A5.8	1.60987	0.00896601	math-27	0.627619	0.154816	Y73B6BL.44	0.923218	0.00220829
Y51B9A.9	1.38911	0.00728876		mcm-4	1.6097	0.00719194	Y43F8A.2	0.62684	0.287487	sma-3	0.921736	0.00681409
F17B5.8	1.1433	0.0654449		C16A3.4	1.60955	0.0075788	fbxa-219	0.626642	0.0882502	C33G8.4	0.920514	0.0145431
fbxa-136	1.76946	0.003081		sig-7	1.60916	0.0072256	Y41D4B.17	0.626337	0.366324	egal-1	0.920083	0.00511076
cat-4	1.92789	0.00680229		dod-3	1.60886	0.0123608	F49C12.6	0.626136	0.0472849	fbxa-54	0.919962	0.0177412
ugt-10	2.01424	0.00728876		eef-2	1.60882	0.0161494	fip-2	0.625606	0.105709	R09D1.11	0.919749	0.00681846
nhr-178	1.6351	0.00480729		hil-3	1.60873	0.0062069	F10C1.9	0.625527	0.356943	F53C11.9	0.919529	0.00424947
R12G8.1	1.40701	0.003081		cyc-2.1	1.60834	0.00685962	nhr-212	0.625474	0.16959	zig-6	0.918961	0.00715719
Y19D10B.7	13.2727	0.000947178		dhs-9	1.60828	0.00631126	T16A9.5	0.625231	0.318554	C49G9.2	0.91876	0.0181948
Y65B4BR.1	3.39092	0.000947178		D2096.11	1.60768	0.0076267	pde-4	0.62517	0.172671	ZC116.1	0.918686	0.00299771
gst-8	4.80819	0.00531842		ZK688.9	1.60755	0.00616277	B0310.3	0.625109	0.122341	tyr-1	0.918319	0.00559731
gst-6	2.14415	0.000947178		rpl-9	1.60752	0.00623106	W01A8.2	0.623819	0.0624691	dve-1	0.917616	0.0048173
gfi-1	1.07787	0.000947178		nhr-122	1.6075	0.00692672	hlh-11	0.623111	0.427816	T28A11.5	0.91663	0.00291802
clec-163	4.69575	0.211883		C34C12.4	1.60746	0.0134571	C50F4.9	0.623006	0.523628	pef-1	0.913712	0.00260876
B0457.6	0.900613	0.00582928		faah-3	1.60719	0.0153039	C08E8.4	0.622101	0.379342	F26F12.3	0.913432	0.00343014
nhr-45	0.833654	0.00728876		rad-51	1.60698	0.00625765	hsp-12.6	0.621956	0.260583	Y8A9A.2	0.912923	0.0126865
cyp-33C7	0.921646	0.0145946		cat-4	1.60689	0.00791053	F43C9.1	0.621901	0.427009	F59E11.5	0.912224	0.00607404
fbxa-61	1.61362	0.000947178		hum-1	1.60625	0.00587452	swm-1	0.621571	0.0956946	K01A2.10	0.912119	0.00917213
cdr-1	4.17009	0.000947178		pas-5	1.60534	0.00759688	ptr-22	0.62117	0.182124	F23H12.3	0.910616	0.00869677
tag-80	1.28473	0.00242805		Y38E10A.17	1.60433	0.162688	maa-1	0.620331	0.267484	T03F1.11	0.909733	0.00630269
C01G10.6	1.55742	0.000947178		F36A2.10	1.60296	0.143175	C54D10.3	0.61764	0.056571	nhr-110	0.908078	0.0123042
C01G10.5	4.0925	0.000947178		R02F2.4	1.60242	0.00921825	ttr-24	0.616631	0.0877175	lgg-1	0.907623	0.00577398
lips-5	1.35451	0.00242805		F15D3.7	1.60202	0.00733021	exc-5	0.616144	0.479471	T02C5.1	0.907495	0.0100005
clec-125	1.90331	0.000947178		ZK1128.4	1.60196	0.00644621	pes-7	0.616022	0.142186	T28A11.20	0.907467	0.0042775
skr-4	1.66353	0.000947178		C54G4.7	1.60175	0.00766804	F14F9.5	0.615698	0.140307	skr-4	0.905815	0.00690968
Y34B4A.9	1.81416	0.000947178		B0285.3	1.60175	0.00631126	pgp-7	0.614596	0.0618036	C37H5.2	0.905455	0.00447822
fbxa-98	1.38202	0.0600029		hil-6	1.60159	0.00616277	H35B03.1	0.613609	0.251735	prx-12	0.902801	0.0125733
K05F1.10	1.84785	0.000947178		ZK131.11	1.60103	0.00587452	T02C5.1	0.613529	0.251332	T01E8.1	0.902769	0.0027198
lmp-2	1.31132	0.003081		T05F1.2	1.60092	0.00587452	F19C7.4	0.613136	0.136514	clec-83	0.902324	0.00606165
ZK180.6	1.09485	0.00242805		T28F3.8	1.60091	0.00718638	ZK593.2	0.612227	0.12481	abt-4	0.901993	0.00426095
cyp-37B1	3.23905	0.000947178		mlc-2	1.60025	0.00708669	B0361.9	0.611567	0.114267	W04B5.2	0.901714	0.00257092
C54C8.12	16.8619	0.000947178		F09F7.6	1.59975	0.0131268	scl-22	0.611527	0.297529	siah-1	0.900306	0.0199151
ins-4	1.98868	0.00172993		R01B10.6	1.59939	0.0179885	nhr-64	0.610955	0.278466	phat-6	0.899508	0.00857652
D2045.8	0.898257	0.0189436		Y46G5A.20	1.59822	0.1895	F42G2.2	0.609685	0.0904916	K08B5.2	0.898944	0.0257223
K07B1.8	1.16771	0.000947178		pptr-1	1.59772	0.00587452	col-147	0.609642	0.807164	T27E4.7	0.898447	0.00993374
cyp-35A4	2.58327	0.00242805		Y51H4A.24	1.5971	0.00677207	ttr-5	0.609296	0.162884	bar-1	0.896644	0.00591035
gst-16	1.0264	0.00480729		fbxc-45	1.59693	0.0117318	Y116A8C.29	0.607192	0.259142	F49C12.6	0.894236	0.00222197
gst-12	2.57491	0.000947178		T24B8.2	1.59677	0.0104947	W02D9.6	0.606155	0.13237	F35C11.4	0.893842	0.00417328
gst-24	1.26588	0.000947178		Y17G9B.4	1.59656	0.0184733	F08B4.3	0.604538	0.324029	C52A10.1	0.893598	0.00295507
sdz-8	1.03051	0.00424549		irg-1	1.59653	0.36532	oig-4	0.60233	0.26205	C03G6.17	0.891937	0.0153301
C55A6.7	1.21851	0.000947178		rib-1	1.5964	0.00737104	ttr-8	0.601741	0.438368	C50D2.1	0.891827	0.0692724
C40H1.8	1.89345	0.000947178		pqbp-1.2	1.5963	0.00615973	Y6E2A.7	0.601695	0.728605	ugt-1	0.891353	0.0473914
ugt-8	1.25313	0.000947178		C27B7.2	1.59593	0.0189772	F49C12.15	0.601436	0.260993	flp-5	0.888128	0.00609641
ugt-13	1.30271	0.000947178		Y62H9A.6	1.59583	0.0141802	catp-4	0.600569	0.376424	acl-12	0.887625	0.00422648
H23N18.4	1.2475	0.0581437		gst-13	1.5956	0.00901115	Y32F6B.1	0.600025	0.43857	C14C6.2	0.887184	0.0491484
T25B6.5	1.00003	1		let-721	1.59553	0.00615973	nhr-109	0.599748	0.181168	F54E2.1	0.88691	0.00507642
Y102A11A.3	1.21721	0.000947178		tag-349	1.59551	0.00708669	Y106G6H.1	0.598732	0.0428055	Y4C6B.2	0.88552	0.00558766
ugt-37	1.48563	0.0089721		aldo-2	1.59516	0.00587452	B0457.2	0.598546	0.110586	Y66D12A.13	0.885124	0.0517529
clec-74	5.42718	0.000947178		C48E7.7	1.59499	0.128258	B0513.5	0.597523	0.136148	T25D10.1	0.884112	0.0291116
spp-21	14.955	0.000947178		T20B12.7	1.59468	0.00781107	ttr-51	0.597353	0.454415	nhr-170	0.880522	0.00511756
T25C12.3	1.24722	0.000947178		F39B2.7	1.59462	0.0158111	T19B10.2	0.596653	0.436993	F25E5.5	0.879711	0.00352329
fbxa-33	2.04007	0.000947178		Y69E1A.2	1.59452	0.0515168	T10B5.7	0.595575	0.120457	C30G7.4	0.87641	0.0117816
F59D6.3	0.829638	0.050175		F52C6.3	1.59401	0.0318394	ttr-7	0.594779	0.296358	ZC247.1	0.875554	0.00931315
col-145	2.46824	0.000947178		F54D5.4	1.59393	0.00915294	F35D11.3	0.594278	0.241005	F58H1.7	0.875458	0.00950844
ghi-1	1.54945	0.000947178		T23G11.7	1.59377	0.00770716	F27C1.1	0.59408	0.379156	B0403.6	0.875292	0.0168191
Y73C8C.10	1.74316	0.0904674		MTCE.11	1.59377	0.00940407	F47B8.8	0.594029	0.148525	D2021.4	0.873136	0.0185759
C14C6.5	0.902269	0.000947178		cpg-3	1.59365	0.0128441	T12B3.3	0.592452	0.117239	cyp-29A2	0.871818	0.0228988
gtl-1	1.07372	0.000947178		msp-32	1.59292	0.115955	ZK813.1	0.592026	0.334631	nhl-1	0.87133	0.00645431
F36F2.2	1.03683	0.000947178		F49E12.1	1.5928	0.0065825	W06H8.5	0.591125	0.0615961	R102.11	0.871006	0.002634
pho-9	1.58912	0.000947178		paqr-1	1.59227	0.0226993	egl-15	0.590285	0.105795	sma-1	0.870586	0.00249214
lec-12	1.12261	0.00242805		asna-1	1.59221	0.00613035	H22K11.2	0.590247	0.137738	ceeh-2	0.870305	0.0276193
F48A11.2	13.3114	0.0077245		K08D10.12	1.59177	0.0161999	Y102A11A.3	0.589645	0.273344	K01F9.2	0.869766	0.00503486
tts-1	2.10832	0.000947178		K06A5.2	1.59126	0.0630296	F09F7.5	0.589214	0.167039	K07D4.9	0.868897	0.00505922
T23F11.6	1.47131	0.000947178		pas-2	1.59122	0.0122659	mnm-2	0.58888	0.10019	ZK863.8	0.868095	0.0040454
C01G10.4	5.23133	0.0419696		pus-1	1.59093	0.011397	C25G4.6	0.588255	0.464045	Y77E11A.2	0.867979	0.00921996
fbxa-100	0.846444	1		F49C12.9	1.59052	0.00857611	H34I24.2	0.587176	0.123455	C50F4.1	0.867957	0.00608912
drh-2	0.893149	0.00172993		trt-1	1.59045	0.00872885	clec-79	0.585141	0.372226	F47B8.10	0.865672	0.124416
cyp-13A7	3.46777	0.0131851		pbs-7	1.59021	0.00848094	C45B2.3	0.585132	0.500683	F08F3.4	0.863794	0.00461978
Y26D4A.3	4.89869	0.0835271		ubh-1	1.59011	0.0279771	F40E3.5	0.584502	0.189384	lbp-5	0.863536	0.0233515
dct-17	5.41594	0.00172993		rpt-3	1.58941	0.0061176	Y71H2B.1	0.584136	0.200175	C25A8.2	0.862691	0.00417326
dhs-9	1.05935	0.000947178		memb-2	1.58911	0.0079795	snf-5	0.583933	0.33869	T04C12.7	0.862182	0.00305154
Y39B6A.22	11.352	1		F44E7.4	1.58895	0.0160576	cri-2	0.583902	0.353056	aex-3	0.861567	0.00311178
K10C2.3	1.80265	0.00172993		lin-24	1.58889	0.00587452	rmd-3	0.583725	0.240302	cnc-3	0.861245	0.017494
Y48A6B.9	0.731109	0.0314525		F07A5.2	1.58886	0.127698	T27A1.2	0.583027	0.218387	C54D1.7	0.861152	0.00822971
H02F09.2	3.21816	0.306057		aak-1	1.58829	0.0221298	scav-1	0.582918	0.0528942	sru-23	0.860469	0.00238144
F11D11.3	5.20294	0.0255157		ula-1	1.58826	0.00950368	clec-67	0.582773	0.104497	Y106G6D.8	0.857464	0.00513343
T12D8.5	1.62729	0.000947178		alh-7	1.58809	0.0065328	Y110A7A.7	0.582165	0.09327	F35B12.9	0.857424	0.00668853
C34D10.2	1.37257	0.000947178		mcm-5	1.58794	0.00719194	Y38E10A.17	0.581709	0.354469	oat-1	0.856819	0.00794548
R08C7.12	1.5158	0.00728876		san-1	1.58771	0.00599954	C45G9.9	0.581652	0.346345	catp-7	0.85659	0.011666
F59A6.10	0.942128	0.0241992		C05D2.10	1.58727	0.00636894	F08G5.3	0.58072	0.105757	T05H4.15	0.856342	0.00390245
nspe-1	0.919075	0.00934658		tba-2	1.58708	0.0062069	kgb-1	0.580574	0.212336	F15B9.6	0.856069	0.011914
pqn-31	1.31232	0.00632705		haf-2	1.58686	0.005971	F41E6.5	0.580433	0.222422	C27D6.12	0.854774	0.0100321
F10A3.1	0.825145	0.534969		rpl-3	1.58664	0.0288694	F14F9.3	0.579029	0.337676	CD4.1	0.854606	0.00370614
gst-33	1.14985	0.0319351		C49C3.5	1.58591	0.0346725	T07A9.9	0.578775	0.179852	Y57A10B.1	0.8534	0.0033865
swt-7	0.741958	0.010984		lin-53	1.58523	0.00636854	F42E8.2	0.578442	0.329369	F59C6.11	0.853173	0.00438244
spp-3	0.587405	0.0460287		hcp-2	1.58519	0.00648034	flp-24	0.576791	0.0956946	spp-8	0.851462	0.0325148
tni-1	0.593203	0.0426593		eif-3.E	1.585	0.0244295	ccch-1	0.576717	0.222044	Y40C5A.1	0.850236	0.00686069
K12H4.7	0.768419	0.0101885		C53B4.6	1.58488	0.0284594	M163.1	0.576658	0.177673	ech-8	0.849921	0.0321281
gst-30	0.873802	0.0980203		lec-10	1.58467	0.077716	Y38H8A.3	0.576484	0.330427	ZK402.3	0.849837	0.013402
F13D12.6	0.554975	0.346656		cps-6	1.58383	0.0115669	scl-5	0.575073	0.123089	F27D9.2	0.847897	0.0156701
F41E6.11	0.697965	0.136815		pch-2	1.58374	0.0136741	F28E10.5	0.574679	0.135945	nlp-1	0.843862	0.0191399
fbxa-84	0.621338	0.325717		K10B4.3	1.58371	0.0420961	F13H8.1	0.573666	0.206921	lgc-28	0.843664	0.0165274
cdr-2	0.702584	0.0358828		K08E3.5	1.58355	0.00587452	skr-20	0.573182	0.239865	fbxa-87	0.842219	0.00283154
asp-3	0.590565	0.131195		nduf-2.2	1.58327	0.0114504	acdh-7	0.573177	0.0971042	M02B1.2	0.840792	0.0042466
C50B6.7	0.580297	0.0887613		tbb-2	1.58277	0.00701685	acdh-8	0.573054	0.212843	nspc-5	0.840306	0.0507215
F25D1.5	0.875602	0.0585762		F42H10.6	1.5827	0.0139951	T21G5.4	0.572806	0.273719	ZK836.3	0.839342	0.00503317
hsp-12.3	0.575527	0.260004		rpn-7	1.58253	0.00620405	F58A6.9	0.572218	0.342258	C49A1.10	0.838764	0.0115478
col-157	0.711114	0.252859		col-95	1.58215	0.0226292	flp-12	0.571276	0.211531	cri-2	0.838487	0.0162876
ugt-26	0.756616	0.00680229		C43H8.2	1.58203	0.0141544	C36B1.11	0.57006	0.734888	F21F8.2	0.838167	0.0608787
grd-6	0.50984	0.346554		tag-174	1.58203	0.00934789	F32B6.4	0.569143	0.222422	cnc-11	0.837165	0.0102849
arf-1.1	1.93146	0.199919		kel-3	1.58172	0.00599954	R01B10.3	0.569023	0.210085	rpr-1	0.83654	0.0178659
F54E2.4	0.710885	0.219286		rab-6.1	1.58152	0.00772468	ras-2	0.568662	0.217093	F54D5.4	0.83632	0.0476549
pqn-54	0.99025	0.220619		ttr-5	1.58145	0.0152457	W03D8.9	0.568622	0.522764	pghm-1	0.835216	0.0158999
pgp-8	1.12238	0.0177322		npl-4.2	1.58077	0.0139711	F37C12.10	0.568524	0.055908	tag-224	0.834158	0.00295038
ZK669.4	17.9277	1		ZK1127.5	1.58068	0.0171799	fbxa-156	0.568353	0.162684	C26E1.3	0.83363	0.00466947
abu-1	0.989961	0.234024		F59C6.12	1.58052	0.0175167	twk-33	0.567647	0.176443	K06B9.6	0.833387	0.00336455
clec-172	1.15118	0.174853		rpb-4	1.58043	0.00846224	tat-2	0.567551	0.0929301	faah-6	0.833204	0.0169522
C04G6.2	0.615853	0.597964		C01G10.8	1.58018	0.00792852	F59A6.12	0.567476	0.048377	K02A6.3	0.833105	0.0115964
dct-5	0.817046	0.281532		T06D8.9	1.57976	0.00587452	gsto-3	0.566994	0.212997	ncam-1	0.83303	0.0256512
gst-7	0.718132	0.0131851		H24K24.3	1.57923	0.00649428	fipr-1	0.566792	0.241035	ZC204.12	0.832865	0.0234339
T24C2.5	1.11304	0.00856701		cts-1	1.57917	0.00744351	srw-86	0.566382	0.078435	T27C5.8	0.832273	0.00722305
ugt-19	0.701179	0.0701561		F25H2.4	1.5783	0.00625765	sax-1	0.566263	0.0983286	T06E6.10	0.832058	0.00353525
sir-2.3	0.514366	0.354576		gsp-4	1.57818	0.0581983	tsp-2	0.565786	0.571318	ZC581.3	0.831936	0.00451104
T06E4.10	0.623053	0.197272		T26G10.1	1.57809	0.00706143	Y48G9A.9	0.565459	0.332773	ubc-23	0.831793	0.0112535
F57F4.4	1.42321	0.0249628		T10E9.4	1.57808	0.136749	Y15E3A.4	0.565323	0.354016	nhx-9	0.830937	0.00486824
C45B2.2	0.510362	0.211764		dna-2	1.57742	0.00587452	tag-10	0.565033	0.278078	C03B1.14	0.830569	0.0240321
C42D4.3	0.870447	0.017027		F27C8.6	1.57709	0.00587452	D2021.4	0.563596	0.114806	sod-4	0.829905	0.00272152
Y19D10B.1	8.94361	1		rbg-1	1.57675	0.013795	F56D5.6	0.563186	0.274582	clec-63	0.829844	0.00530301
K12D9.1	1.76152	1		F45F2.9	1.57623	0.0298317	D1086.1	0.562855	0.194016	T24B8.4	0.829722	0.00253612
C08B6.4	0.650741	0.211133		B0495.5	1.57575	0.00807258	nhr-193	0.562571	0.297077	C02F5.7	0.829496	0.00681922
C08B6.4	0.845452	0.0667112		nspd-6	1.57563	0.0440259	F10G2.1	0.562325	0.276895	fbxa-3	0.829294	0.00231317
Y75B8A.3	0.741804	0.0309285		W03D8.9	1.5753	0.0875074	msd-2	0.56186	0.222325	ttr-32	0.829005	0.0390672
ech-1	0.50709	0.340472		pir-1	1.57478	0.0115414	C05B5.8	0.561489	0.358589	K10B3.6	0.828877	0.00365213
Y54G2A.36	0.633427	0.0532623		Y45G5AM.3	1.57376	0.0130605	col-163	0.560159	0.69913	F52E1.5	0.827212	0.0104378
dpy-1	0.55011	0.38016		F35G12.5	1.57321	0.00930749	K05B2.4	0.559809	0.258825	pqn-44	0.827086	0.0256654
T26H5.8	1.75858	0.0665329		scc-3	1.57303	0.005971	ZK484.1	0.559778	0.13227	F53C3.13	0.826386	0.00861466
dpy-1	0.613684	0.366354		C18B2.4	1.57294	0.0320121	faah-1	0.557841	0.149153	W05H9.1	0.825881	0.00658922
Y64H9A.2	0.922236	0.02672		W05F2.3	1.57244	0.00599954	W02C12.2	0.557102	0.295801	ccg-1	0.82573	0.00759676
wrt-9	0.504729	0.314082		F54D5.11	1.5724	0.00784908	F59H6.3	0.557099	0.14402	paf-2	0.824849	0.0151487
W02D7.11	2.74246	0.524703		rla-1	1.57176	0.00710748	asm-3	0.555827	0.132765	fbxa-156	0.824266	0.0111262
cyp-13A8	1.4736	0.143343		M18.3	1.57136	0.0106557	htas-1	0.554722	0.385638	C35E7.9	0.823923	0.0123504
bbs-2	0.582688	0.254751		pbs-6	1.57135	0.00587452	T26C12.1	0.554613	0.417243	nhr-146	0.823651	0.0102434
C02E7.7	1.10649	0.000947178		nars-1	1.57089	0.00587452	Y66H1A.5	0.554243	0.0697083	W04B5.1	0.823209	0.0678151
dpy-17	21.0149	1		F35G12.2	1.5708	0.00955164	col-139	0.554226	0.249986	E04F6.4	0.822819	0.00717759
spp-12	2.0364	1		lat-1	1.57065	0.0113698	T27E7.1	0.553639	0.274256	ZK688.2	0.82173	0.0185285
hsp-12.6	1.84705	0.041285		Y65B4BR.1	1.57062	0.00639743	Y54G2A.10	0.553138	0.0688199	Y6E2A.7	0.820753	0.411344
ugt-33	0.966818	0.155078		his-72	1.5703	0.00617195	T24F1.3	0.552056	0.147876	Y52E8A.3	0.820109	0.00229635
F21E9.2	0.50242	0.50386		C30H6.8	1.5699	0.00712334	Y51H4A.7	0.551696	0.243837	C31C9.6	0.820055	0.0472296
W08E12.6	0.746682	0.127626		mai-2	1.56964	0.00608058	F55G1.15	0.551668	0.048377	F13B6.2	0.819374	0.0334325
ugt-34	2.22115	0.0551745		R12E2.1	1.56944	0.0065825	F26G1.2	0.551609	0.218387	T10G3.1	0.819153	0.00335582
pqn-71	0.565834	0.150313		otub-1	1.56924	0.0065825	F13E6.4	0.551316	0.278466	cdr-4	0.818701	0.00362457
cyp-33C2	0.985391	0.264248		T06A10.2	1.56903	0.00922828	F23F12.13	0.55108	0.137638	C15H9.11	0.818253	0.0190205
C14A11.2	0.523035	0.247887		mbf-1	1.56858	0.00589707	clec-73	0.550648	0.315918	F08D12.2	0.818175	0.0352368
				F53A9.7	1.56856	0.189436	M7.12	0.550047	0.285025	F35H8.2	0.817607	0.00244398
				nst-1	1.56841	0.0126278	nhr-79	0.54965	0.0792436	nhr-177	0.816464	0.0251258
				T05E11.3	1.56801	0.00587452	K06B9.6	0.549299	0.321318	bcc-1	0.815662	0.00753791
				cpf-1	1.56797	0.00795637	mpk-2	0.549297	0.0634312	ctl-2	0.814774	0.041362
				cpg-1	1.56762	0.00589707	B0334.3	0.548942	0.0947039	D1053.3	0.814322	0.0171832
				B0035.13	1.56755	0.00689753	fbxa-157	0.548765	0.185552	W05B10.4	0.814023	0.0121795
				rla-2	1.56748	0.0104774	ZK265.3	0.548733	0.320255	Y75B8A.29	0.813729	0.0289285
				F52E1.13	1.56733	0.0127942	kgb-2	0.548301	0.219518	glct-6	0.813373	0.0113657
				cbd-1	1.56715	0.00587452	Y43C5A.2	0.54736	0.234588	C39D10.11	0.813045	0.00580585
				R08D7.2	1.56712	0.0225746	T06E6.10	0.546805	0.347058	mec-17	0.811607	0.16141
				F49C12.11	1.56697	0.00839039	F54D5.3	0.546622	0.115558	VC5.2	0.810132	0.00483442
				asg-1	1.56665	0.0117299	Y47H9C.1	0.546279	0.118549	Y42A5A.3	0.808782	0.00368185
				Y67H2A.4	1.56649	0.0173225	T19H5.4	0.545783	0.123547	galt-1	0.807281	0.0658499
				C44E4.5	1.56645	0.00852457	fbxa-21	0.545772	0.136962	F55G1.15	0.807228	0.0265169
				Y39G10AR.20	1.56632	0.00689753	F47B8.2	0.545578	0.317243	tbc-6	0.806698	0.00350278
				Y32F6A.4	1.56629	0.015914	H36L18.2	0.545058	0.0615764	C32H11.1	0.806512	0.0809963
				C35B8.3	1.5662	0.00937774	F25E5.5	0.544669	0.206149	C07A4.3	0.805787	0.00259464
				ZK546.3	1.56613	0.120364	F53F1.6	0.544316	0.444448	F55G11.8	0.805412	0.00717759
				his-24	1.56591	0.0203426	K01D12.15	0.543993	0.377778	ZK673.1	0.805274	0.0311929
				vps-28	1.56583	0.00587452	mfb-1	0.543945	0.200145	C24G6.6	0.804669	0.0146376
				F09G2.8	1.5658	0.00786446	C16D9.3	0.543499	0.660897	C18C4.5	0.804409	0.00322556
				rars-1	1.56571	0.0114424	C29F9.3	0.543409	0.202463	F11D5.5	0.803459	0.00385344
				F58E10.3	1.56569	0.0087187	C01B10.6	0.543357	0.251401	dod-23	0.79973	0.00994355
				bir-2	1.56542	0.00643131	R05D3.3	0.541952	0.374031	R07G3.8	0.799121	0.00409421
				C25G4.6	1.56496	0.0589759	nhr-56	0.541196	0.104228	nhr-43	0.799119	0.0137226
				D1007.10	1.56492	0.0106557	fipr-4	0.540773	0.297552	nhr-203	0.796645	0.00567067
				pri-1	1.56462	0.0129656	M117.1	0.540326	0.327181	nhr-56	0.794569	0.00341422
				R12E2.2	1.56461	0.0126865	ZK1240.2	0.539734	0.04917	F59F4.1	0.794231	0.011488
				T08B2.4	1.56446	0.00777772	K12C11.7	0.539383	0.188884	Y73F8A.11	0.794227	0.00300731
				ercc-1	1.56414	0.00707976	F07A5.2	0.538687	0.473537	cpz-2	0.794119	0.0912775
				dut-1	1.56406	0.00765459	F52F10.2	0.53707	0.384374	T28H10.2	0.793977	0.0172253
				alh-11	1.56404	0.00599954	W02B12.12	0.536641	0.356943	lys-2	0.793241	0.0234849
				W09G3.1	1.56394	0.0120353	Y44A6C.1	0.53647	0.222422	F49F1.5	0.790996	0.00579785
				scav-3	1.56389	0.00637749	dct-11	0.535742	0.360575	C06G3.5	0.790825	0.0151597
				ftr-1	1.56373	0.0210737	B0280.17	0.535624	0.473644	flp-22	0.790393	0.0257195
				abcf-3	1.56371	0.0079248	F13A7.1	0.534877	0.283492	fbxa-82	0.790172	0.00664242
				msd-4	1.56348	0.0724286	sss-2	0.534491	0.325754	bath-38	0.790145	0.00441309
				C27F2.4	1.56338	0.0196592	ZK6.8	0.534177	0.0506484	str-176	0.789632	0.135445
				fbxa-197	1.56331	0.0283159	acdh-4	0.534174	0.198169	C30F12.3	0.789258	0.016508
				C08B11.6	1.56319	0.00969177	ZC204.12	0.533899	0.172923	Y45G12C.1	0.788789	0.0123011
				K03B4.1	1.56309	0.00896601	C25E10.12	0.5336	0.316535	B0563.7	0.786736	0.00287198
				F21H7.5	1.563	0.0603252	Y38H6C.17	0.532572	0.315578	F09F9.3	0.78661	0.00988723
				Y54G9A.7	1.56267	0.0167542	kin-14	0.532315	0.200126	pqn-25	0.786459	0.00880886
				C15C7.5	1.56258	0.144561	F17H10.2	0.532088	0.218457	C32D5.6	0.785737	0.0539183
				C14B1.2	1.56172	0.00817388	T04B2.5	0.53155	0.337729	Y32B12C.1	0.785543	0.0248358
				C25H3.12	1.56082	0.0114424	F54D7.2	0.530672	0.0509842	ZK180.7	0.78509	0.00902246
				T05H4.10	1.56025	0.0136741	B0379.7	0.530123	0.351718	aakg-4	0.784661	0.00343014
				F44E2.8	1.56022	0.0062069	nac-2	0.529115	0.0902766	C14B1.3	0.783172	0.00487876
				alh-3	1.56021	0.00766575	tag-76	0.52828	0.533934	F52E1.2	0.781521	0.00488995
				snr-3	1.56017	0.0086626	C34H4.1	0.527627	0.10019	Y40B10A.9	0.780499	0.00670517
				tag-298	1.56	0.00956738	F21F3.6	0.526713	0.0673886	C44F1.1	0.779917	0.00359496
				emb-9	1.55966	0.00689489	ZK673.2	0.526489	0.300257	flp-17	0.779912	0.00307937
				apc-10	1.55952	0.00708669	kel-8	0.525421	0.161877	C03H5.4	0.779898	0.0211407
				Y54E5A.5	1.55941	0.0141288	K06G5.1	0.523861	0.287892	K02B7.3	0.779631	0.00584225
				rpa-2	1.55902	0.00640916	D1046.5	0.523765	0.104501	frm-2	0.778077	0.0222368
				nhr-8	1.55885	0.248632	C11G10.1	0.523723	0.105757	fbxa-80	0.777719	0.0129811
				T24H10.4	1.55864	0.00587452	F53H10.2	0.523517	0.138481	nhr-109	0.777475	0.00527414
				ttr-16	1.55833	0.00589707	W03F8.6	0.52347	0.0757618	lys-8	0.776489	0.00910818
				Y54G9A.5	1.55821	0.00810119	bar-1	0.523226	0.127559	cyp-33A1	0.775574	0.0393235
				ucr-1	1.55808	0.00639743	C45G9.4	0.522658	0.390231	F46C5.10	0.775007	0.0371989
				Y39A1A.7	1.55775	0.0160569	K04H4.5	0.522653	0.368822	btb-9	0.774708	0.0160987
				Y71F9AL.4	1.55772	0.0104055	F32D1.11	0.522545	0.28669	K12B6.9	0.774692	0.00786428
				daz-1	1.55761	0.00890359	nhr-21	0.522377	0.159406	Y38C1AA.6	0.774263	0.00595695
				ZC247.1	1.55752	0.011559	fbxa-6	0.52191	0.0628006	K09C6.9	0.7739	0.067403
				R119.3	1.55736	0.020993	fbxa-122	0.521542	0.143157	gst-35	0.773171	0.0157278
				C30G4.7	1.55735	0.00625162	T28A11.5	0.521494	0.258295	C14C11.4	0.77196	0.102819
				T24D1.2	1.55732	0.00923534	siah-1	0.521395	0.248107	fbxc-23	0.771748	0.00331772
				skr-2	1.55732	0.00744217	C25E10.10	0.521306	0.350974	nhr-19	0.770326	0.00326421
				rps-30	1.55708	0.0117781	F07E5.4	0.521124	0.365617	K06A4.7	0.769452	0.00411156
				cars-1	1.55708	0.00715485	T22F7.1	0.520826	0.417243	srg-34	0.766889	0.0181754
				C47G2.4	1.55671	0.00795637	nhr-63	0.520812	0.34734	T27D12.1	0.765187	0.00937678
				ZK177.8	1.5566	0.00625751	T05E11.9	0.520609	0.168618	W01A11.7	0.762744	0.00546312
				F44E2.6	1.55654	0.005971	F46G10.2	0.518888	0.113968	C23H3.9	0.762491	0.0276321
				fln-1	1.55614	0.0353281	clec-66	0.518781	0.428185	F08G2.8	0.762377	0.0095848
				klp-15	1.55605	0.00652923	ncs-2	0.518432	0.292759	F41C3.1	0.761562	0.004338
				umps-1	1.55593	0.00587452	nlp-2	0.518205	0.289057	F59C6.2	0.760353	0.356033
				C27B7.5	1.55513	0.00587452	T23F2.4	0.517943	0.276895	T14E8.1	0.760272	0.0669093
				C42C1.11	1.55482	0.00587452	C50F2.5	0.517641	0.417243	hmit-1.3	0.759948	0.0443511
				R10E9.2	1.55449	0.0717976	ttr-45	0.516959	0.547592	K08B4.7	0.759359	0.0153991
				C02D5.4	1.55405	0.0117648	hex-1	0.515823	0.474676	D1086.12	0.758654	0.00663038
				nmy-2	1.55385	0.005971	C30F12.1	0.515338	0.0688199	cyp-34A5	0.758359	0.0125138
				F58F9.3	1.55383	0.011965	sox-2	0.514926	0.266343	mdl-1	0.757752	0.00417569
				eif-3.I	1.55366	0.0167212	Y37B11A.3	0.51482	0.200126	C54F6.5	0.757681	0.0200173
				F46G10.1	1.55349	0.0064623	Y54E10BR.4	0.514166	0.13237	Y119D3B.13	0.757681	0.00483165
				Y41D4A.6	1.55345	0.0138954	pho-4	0.513978	0.198169	fbxa-115	0.756912	0.0154742
				kin-10	1.55333	0.00690438	W03F11.1	0.513882	0.563708	F55G1.12	0.755449	0.00688486
				C04F12.5	1.55309	0.0133799	nspd-3	0.513507	0.358293	nhr-135	0.755192	0.00430145
				T05E12.3	1.5528	0.0347106	cki-1	0.512038	0.222995	flp-4	0.755169	0.00655552
				cey-1	1.55237	0.00797872	sulp-2	0.51202	0.330221	clec-65	0.754911	0.00948264
				F46B6.12	1.55224	0.00616277	C39H7.1	0.511209	0.416206	nex-2	0.754673	0.00735855
				Y38C1AA.7	1.5521	0.0980199	Y37D8A.5	0.510405	0.402189	nhr-153	0.75464	0.0173226
				pas-6	1.55136	0.00671342	Y32F6A.5	0.510141	0.452022	nob-1	0.754607	0.00653071
				C49F5.7	1.55133	0.0302498	B0302.5	0.51013	0.123037	nmur-4	0.753245	0.0783661
				ubc-16	1.55107	0.00765623	F41C3.1	0.510128	0.0912386	F14F9.5	0.753144	0.0165112
				F43E2.7	1.55079	0.00615973	cyp-34A4	0.509279	0.0892559	Y41G9A.5	0.752849	0.0195778
				D2089.3	1.55074	0.0146291	mlc-3	0.508927	0.549821	Y106G6H.4	0.752681	0.00385965
				dpf-5	1.55002	0.00599954	T24C4.4	0.508316	0.67016	C27A7.1	0.752597	0.0128395
				sss-1	1.54986	0.17048	F22B7.9	0.508026	0.140269	clec-173	0.752197	0.0185945
				C53H9.2	1.54975	0.00690932	sth-1	0.507646	0.0806172	C25F9.14	0.75129	0.0347808
				F19F10.12	1.54972	0.00825221	Y37D8A.2	0.507571	0.107216	nhr-183	0.749746	0.00390986
				C25H3.7	1.54947	0.00625751	F34H10.3	0.507347	0.131312	arrd-7	0.74882	0.0166036
				Y110A7A.9	1.54936	0.00756466	str-88	0.507281	0.0628006	nlt-1	0.748629	0.0460488
				nft-1	1.54935	0.00615973	F26F4.2	0.507074	0.416606	C07E3.9	0.748398	0.00685282
				daf-21	1.54918	0.00915294	C06G8.3	0.506492	0.262605	nas-37	0.74719	0.0929741
				T08B2.11	1.54912	0.0236251	ZK550.5	0.506016	0.328652	flp-19	0.746981	0.0195922
				Y39B6A.37	1.54848	0.00655416	T28F3.8	0.505892	0.312828	cht-1	0.744214	0.00869368
				acl-9	1.54797	0.00737104	nhr-3	0.505343	0.333921	E04F6.8	0.742443	0.0118022
				atp-5	1.54794	0.00789337	clec-166	0.504933	0.308541	C32E12.4	0.742269	0.00505922
				F15B9.10	1.54763	0.00710748	W04B5.2	0.504715	0.123033	C25E10.8	0.74216	0.016911
				dph-3	1.54745	0.0122535	cpr-2	0.504511	0.363063	F58F9.3	0.741999	0.0119367
				atg-3	1.54712	0.00615973	B0379.2	0.504065	0.386279	lin-42	0.741949	0.508804
				K07A1.9	1.54708	0.018495	C46H11.2	0.504062	0.323236	acs-14	0.741837	0.0447798
				clpp-1	1.54681	0.0109018	ras-1	0.503836	0.222044	F11C7.2	0.74143	0.0254377
				F25H5.8	1.54671	0.00643772	ift-74	0.503536	0.902421	vab-9	0.74123	0.0130114
				wee-1.3	1.54669	0.00701771	gpa-17	0.503185	0.376431	tag-343	0.740974	0.00339554
				T05H10.7	1.54649	0.00795637	F26E4.7	0.502232	0.334821	nhr-225	0.740205	0.0177087
				ced-12	1.54642	0.00877331	F11D5.5	0.502223	0.358552	ZK1307.2	0.73993	0.0278342
				K08E3.4	1.54621	0.00587452	fipr-5	0.501534	0.370767	apl-1	0.739063	0.010293
				F42G2.2	1.54565	0.00587452	clec-55	0.501523	0.117646	F07C6.2	0.738797	0.0370817
				W05F2.6	1.54549	0.00923173	K08C7.6	0.500729	0.0929566	flp-3	0.738281	0.0113559
				sac-1	1.54537	0.0065395	ZK1307.2	0.500243	0.160458	F41G3.1	0.737706	0.00557177
				T16H12.4	1.5451	0.00643863	cyp-34A2	0.499594	0.0929301	C46H11.2	0.737435	0.0230404
				C27H6.3	1.54451	0.016177				nlp-11	0.73602	0.00854789
				W06G6.11	1.54412	0.00744217				F19B2.5	0.73553	0.00466855
				akt-1	1.54395	0.00613261				C36B1.13	0.735173	0.018872
				C55A6.1	1.54385	0.00619365				Y69H2.10	0.734961	0.00614453
				Y48E1C.2	1.54379	0.0103023				C03D6.1	0.734349	0.0379709
				Y50D4A.2	1.54348	0.00766274				C28G1.2	0.733659	0.0147256
				vps-20	1.54337	0.0084912				ifb-2	0.732444	0.0186585
				tag-264	1.54319	0.00961185				his-71	0.732081	0.0102358
				T16A9.5	1.54301	0.134132				nlp-2	0.731412	0.107391
				clec-87	1.54277	0.00807258				Y32F6B.1	0.731136	0.00779369
				pgl-1	1.54247	0.00625751				clec-5	0.731068	0.0565862
				C39E9.11	1.54236	0.00744217				Y39C12A.1	0.729535	0.0183292
				prdx-6	1.5423	0.0134571				btb-21	0.72836	0.00296827
				K09H9.2	1.54208	0.0116143				F26F12.5	0.7281	0.00601004
				mig-6	1.54129	0.00933644				tcer-1	0.727048	0.0331665
				czw-1	1.54128	0.00679395				nhr-211	0.726892	0.0120574
				pho-5	1.54071	0.0174751				F13E9.11	0.726619	0.0377781
				C03H5.2	1.54052	0.00977662				F09F7.6	0.725126	0.0133337
				skr-19	1.54048	0.0086626				D1044.7	0.724985	0.00770615
				qars-1	1.5402	0.00677207				F53A9.9	0.724506	0.00571368
				asns-2	1.53975	0.00718664				B0457.2	0.724355	0.0123532
				ddo-3	1.53966	0.00956086				F17H10.2	0.724288	0.0123504
				elpc-3	1.53931	0.00881262				Y57A10A.14	0.724275	0.00296892
				kbp-4	1.53918	0.00877068				flp-11	0.724197	0.00332528
				rsa-1	1.53909	0.00599954				srg-7	0.724135	0.506849
				C04F5.8	1.53906	0.0147883				K02C4.5	0.723364	0.0209594
				ZK688.3	1.53889	0.0138702				Y105C5A.24	0.723024	0.00644445
				F21F3.4	1.53829	0.00770244				T24F1.3	0.72226	0.00910818
				K04G7.1	1.53792	0.00615973				K09E4.4	0.722164	0.00607415
				ttr-54	1.53787	0.00637749				math-39	0.721996	0.00296102
				dnc-2	1.53758	0.00708669				T14G11.1	0.7218	0.0359871
				ran-1	1.5372	0.00671613				fbxa-92	0.72139	0.00876208
				vrk-1	1.5369	0.0111793				zig-7	0.719371	0.110045
				clec-50	1.53667	0.005971				W06F12.2	0.718807	0.0318623
				pqn-89	1.53665	0.0954457				clec-174	0.718699	0.0100543
				K11H12.8	1.53664	0.00690932				F59B1.8	0.718183	0.0176706
				F32E10.5	1.53649	0.00650764				F13E9.13	0.717687	0.0105068
				B0303.3	1.53603	0.00623106				Y47H9C.1	0.71695	0.0368506
				sec-16	1.53602	0.0245647				sid-2	0.716935	0.0137668
				kars-1	1.53555	0.0240915				nhr-162	0.716599	0.00385938
				snap-1	1.53545	0.00770019				F19F10.3	0.715489	0.0274068
				T13F2.2	1.53507	0.00856506				cyp-34A2	0.715332	0.0140421
				his-64	1.53494	0.0141288				trpa-1	0.714684	0.00697872
				C46A5.6	1.53491	0.0198356				C13E3.1	0.714296	0.0037768
				ugt-31	1.53487	0.013795				F28E10.2	0.714207	0.0354541
				nspd-2	1.53472	0.0967439				Y54G2A.32	0.713461	0.00481301
				hmg-1.1	1.53471	0.00812526				plc-2	0.712885	0.0108737
				F13B12.1	1.53454	0.00687767				sre-21	0.712219	0.554666
				rnp-5	1.53428	0.00839392				F46A8.1	0.71196	0.00571368
				R02D3.8	1.53387	0.00615973				T28H11.8	0.711494	0.0042296
				R11H6.2	1.53343	0.00587452				K10D11.3	0.709745	0.0575129
				M28.5	1.53321	0.0071054				F41H10.5	0.70845	0.00406744
				C03B8.2	1.53297	0.00744351				C45B11.2	0.708331	0.00493854
				C44E4.1	1.53294	0.005971				F25E2.3	0.704742	0.00833463
				lig-4	1.53285	0.0147845				ttr-8	0.703793	0.0126709
				T04G9.7	1.53247	0.00874261				W02D7.11	0.70363	0.0172049
				his-31	1.53219	0.00587452				isl-1	0.70292	0.00397254
				snr-2	1.53208	0.00939257				nhr-107	0.702142	0.00910851
				T25G3.3	1.53204	0.0191858				Y73F4A.3	0.70212	0.00383016
				clec-222	1.532	0.0136918				D1054.5	0.70191	0.0123532
				ZK813.3	1.53198	0.0113281				fbxa-147	0.701367	0.523849
				dhs-21	1.53187	0.0283761				phat-4	0.700901	0.0116875
				W02D9.7	1.53183	0.0123203				nfm-1	0.700172	0.00829897
				W02D3.1	1.53179	0.0218603				nlp-15	0.697529	0.00842504
				C06A5.8	1.53156	0.005971				nlp-20	0.69733	0.0749373
				rod-1	1.53155	0.0120167				C34E11.4	0.696116	0.0819649
				F40A3.3	1.53134	0.0120786				ZK353.2	0.69559	0.0115944
				spr-2	1.53118	0.0069984				inx-16	0.695434	0.00547346
				ttr-15	1.531	0.00689753				pho-8	0.695165	0.00977614
				cct-1	1.5308	0.00934789				F02E11.7	0.695018	0.00305793
				hipr-1	1.53051	0.0160832				K03D7.9	0.694658	0.402777
				tag-179	1.5303	0.0405691				H41C03.1	0.694582	0.015438
				Y54G2A.18	1.52994	0.00952563				F52D1.2	0.69451	0.00438244
				C53A3.2	1.52991	0.0735188				Y34F4.1	0.694219	0.00766255
				rpn-10	1.52987	0.00649428				K02F3.9	0.693861	0.0369173
				egg-5	1.52968	0.00587452				ZC395.4	0.693062	0.0517529
				K02F3.9	1.52953	0.012903				T28A11.16	0.692428	0.00514569
				E_BE45912.2	1.52947	0.024163				C04H5.9	0.691217	0.0317833
				Y57G11B.5	1.52935	0.0081146				T28F3.9	0.690464	0.0102952
				ZK430.7	1.52903	0.0159548				Y51B9A.9	0.690463	0.00511756
				Y57E12AL.6	1.52902	0.00625751				R05A10.2	0.690395	0.0108002
				E02D9.1	1.52894	0.00708669				lec-8	0.689149	0.0599339
				K10C9.3	1.52875	0.00587452				M01B2.6	0.688864	0.0178978
				F32E10.6	1.52837	0.00951153				F36F2.1	0.688706	0.00715606
				tbg-1	1.52831	0.0076559				F32H5.3	0.688323	0.0078959
				ZC168.3	1.52819	0.00678471				lec-10	0.687663	0.00935403
				ivd-1	1.52819	0.00809403				K12C11.7	0.68721	0.0139149
				R02F2.7	1.52813	0.0137464				F47B10.2	0.687173	0.0312535
				lsy-13	1.52777	0.00797308				C45B2.8	0.686418	0.0560384
				stam-1	1.52775	0.00615973				C33G8.2	0.684518	0.00679806
				T22F3.11	1.52767	0.00587452				nhr-182	0.683182	0.00619174
				atp-2	1.5276	0.00685985				nlp-3	0.683143	0.00609726
				Y59A8B.10	1.52755	0.005971				C27H2.2	0.682652	0.004567
				arx-7	1.52742	0.00743552				nac-2	0.6824	0.00549937
				arrd-13	1.52704	0.00594689				C26D10.4	0.682195	0.0142041
				tbh-1	1.52649	0.0102119				lrp-1	0.682108	0.00588566
				pat-10	1.52626	0.00625821				K08D8.5	0.681504	0.14514
				K08F4.2	1.52573	0.00587452				Y39B6A.27	0.681319	0.00876399
				Y106G6H.16	1.52538	0.0186438				C06B8.11	0.680473	0.252709
				F59C6.5	1.52509	0.0188176				C51E3.10	0.679799	0.0743256
				F52C6.12	1.52504	0.00625751				T11G6.7	0.679016	0.425577
				hmg-5	1.52486	0.00738616				ugt-7	0.677714	0.00425013
				Y37D8A.11	1.52481	0.00626832				C12D8.2	0.677291	0.0464555
				ggtb-1	1.5246	0.00726676				T19C3.4	0.676461	0.00440337
				rpt-2	1.52446	0.00623106				C06B8.2	0.676256	0.0179737
				Y37H9A.5	1.52445	0.00785904				F52E10.4	0.676136	0.0165737
				F35G2.2	1.52432	0.00587452				Y41E3.6	0.675936	0.00748463
				F11G11.5	1.52421	0.00587452				nlp-9	0.675693	0.0133486
				pcn-1	1.52411	0.00795637				F59A7.9	0.675205	0.00610353
				C27A12.7	1.52399	0.00708669				ZK470.2	0.674805	0.0246657
				atp-4	1.52342	0.00772626				F27E11.1	0.673841	0.00405435
				Y71H2B.1	1.52317	0.00718664				nhr-206	0.673752	0.00666798
				Y59C2A.3	1.52317	0.00968026				K03A11.5	0.672987	0.0348612
				ZK637.2	1.52304	0.00882052				Y82E9BR.21	0.672927	0.0190092
				ttll-5	1.52288	0.0102407				scl-22	0.67286	0.0663677
				fic-1	1.52275	0.00678471				scrm-4	0.672592	0.00950844
				F44D12.4	1.5225	0.124447				thn-2	0.672588	0.0944113
				T09F3.4	1.52247	0.0172028				Y48G8AL.13	0.672238	0.016059
				C29F4.2	1.52243	0.0346725				B0222.3	0.672026	0.00385938
				rpn-3	1.52237	0.00776468				F15D4.4	0.671611	0.00498259
				M116.2	1.52199	0.00587452				nhr-45	0.671483	0.0541721
				nhr-247	1.52197	0.436252				maoc-1	0.670951	0.109922
				Y110A7A.4	1.52195	0.00655416				F36G9.3	0.67081	0.00595724
				chs-1	1.52195	0.00587452				C31B8.7	0.66975	0.00875808
				K08E4.3	1.52169	0.00587452				Y73F4A.2	0.669717	0.0567165
				cpg-8	1.52168	0.00587452				fbxa-38	0.669713	0.00685183
				dhs-22	1.52164	0.0188501				dlc-3	0.669496	0.00645526
				hel-1	1.52154	0.0065825				F44F4.1	0.669359	0.0516577
				T05E11.9	1.5215	0.00587452				ttr-27	0.66915	0.00910963
				F22H10.2	1.52143	0.35795				F19B10.13	0.667879	0.0257961
				F37F2.2	1.5213	0.0133312				abt-2	0.667787	0.00397067
				C39E9.12	1.52095	0.00589707				ZK380.5	0.667588	0.0998813
				hmp-1	1.52087	0.0245624				swm-1	0.666688	0.0397266
				snr-5	1.52073	0.00916283				tyr-6	0.666514	0.027036
				unc-15	1.52046	0.020485				T09B9.2	0.664726	0.00438653
				cln-3.2	1.5202	0.0104286				C06G8.3	0.664584	0.0630694
				lars-1	1.51969	0.00626529				E02C12.8	0.663988	0.0122117
				Y18D10A.23	1.51923	0.00615973				C31B8.8	0.661828	0.210068
				mrg-1	1.51896	0.00661778				F30B5.7	0.66169	0.0234339
				C17E4.3	1.51894	0.00587452				klp-4	0.660314	0.056888
				VF13D12L.1	1.51857	0.00832349				T28B4.4	0.660001	0.0314162
				Y43E12A.3	1.51853	0.00673401				flp-24	0.659989	0.0416471
				C34C12.7	1.51835	0.0131472				Y41C4A.13	0.659613	0.0171905
				T20F5.3	1.51825	0.0097349				B0563.8	0.65941	0.00431081
				fbxa-101	1.51818	0.0171074				sulp-4	0.658522	0.00517247
				W02F12.1	1.51802	0.0235925				C53C7.5	0.656935	0.0349033
				R12C12.7	1.51802	0.0158111				F49E2.5	0.656577	0.0452724
				dnc-1	1.51789	0.00734701				F13D12.10	0.655754	0.00447237
				F17E9.4	1.5178	0.0296712				Y105C5B.5	0.655458	0.182905
				sago-2	1.51778	0.0103401				Y69A2AR.12	0.655305	0.00337194
				T23E7.6	1.51745	0.0341205				W02G9.4	0.654984	0.0926852
				thk-1	1.51709	0.00683147				F22H10.3	0.654668	0.0225563
				F46H5.3	1.51702	0.0064985				T05E11.2	0.654519	0.0254479
				F55B11.2	1.51691	0.0354915				W03G11.3	0.65412	0.00657965
				mxl-1	1.51672	0.00625765				C34D10.2	0.653331	0.185366
				F26G1.1	1.51665	0.0312203				cwn-2	0.652369	0.0072281
				T07C4.3	1.51656	0.00587452				sgk-1	0.652117	0.0790419
				gsr-1	1.51642	0.00615973				twk-8	0.65062	0.00385938
				riok-1	1.5161	0.0263588				T19D7.6	0.650523	0.0058547
				T03F1.7	1.5161	0.0100933				F59A7.7	0.648884	0.00522681
				cyb-1	1.51608	0.00649428				Y71F9B.9	0.64833	0.0228463
				skr-20	1.51605	0.0192402				ccch-1	0.646777	0.0130517
				R01B10.3	1.51605	0.0109535				F59F3.4	0.645854	0.0474692
				W08E12.3	1.51603	0.0073638				T07D1.2	0.645725	0.016149
				F52C12.6	1.51575	0.0210371				C25F9.10	0.645144	0.0239307
				ndx-9	1.5152	0.00712334				C36A4.11	0.644268	0.00406668
				T10C6.5	1.51514	0.0187626				Y94H6A.2	0.644069	0.0142417
				crt-1	1.51514	0.00587452				puf-9	0.64375	0.0124386
				abi-1	1.51494	0.00587452				nhr-121	0.642688	0.0199702
				F48E8.3	1.5143	0.00892724				fbxa-21	0.642412	0.0124144
				B0513.4	1.51417	0.00923534				T20G5.4	0.642127	0.00887844
				W02B12.15	1.51416	0.00869975				F42A10.7	0.641702	0.443877
				eif-3.B	1.51416	0.014371				glb-10	0.641663	0.00484864
				C30E1.9	1.51404	0.0114424				F46G10.1	0.639132	0.0280079
				F08F8.10	1.51383	0.0104611				F55G11.4	0.638795	0.0175137
				F55G1.6	1.5138	0.00744217				F35D11.3	0.638461	0.0332616
				F17C11.7	1.51358	0.00973036				ser-4	0.638281	0.00899474
				F35G2.1	1.51348	0.00780481				T28D6.7	0.638044	0.0151623
				sars-2	1.51336	0.00741109				W10G11.19	0.637957	0.024881
				C18E3.5	1.51336	0.00938103				K01A2.5	0.637592	0.0101854
				W02D9.5	1.51312	0.0820259				ipp-5	0.637203	0.0249885
				Y57A10A.29	1.51274	0.0250442				C34C12.7	0.637187	0.0425045
				K09E4.3	1.51272	0.0181531				F48F7.5	0.637114	0.0113965
				rpt-1	1.51248	0.005971				W10G11.1	0.636691	0.00883438
				B0035.16	1.51092	0.0173314				klp-11	0.63631	0.00834413
				ZK177.4	1.51081	0.0475062				F34H10.3	0.634802	0.02022
				R186.7	1.51018	0.00599954				F58A3.4	0.634287	0.00993214
				C25A1.1	1.50984	0.0190852				W10C8.6	0.633732	0.00711133
				frm-7	1.50976	0.00913837				aqp-2	0.632972	0.00558478
				cyn-13	1.50974	0.00934789				C50F2.5	0.631854	0.170499
				ced-1	1.50952	0.030025				hlh-30	0.63181	0.00632572
				mau-8	1.50951	0.0195585				avr-15	0.631475	0.00943056
				C06A6.4	1.50911	0.00639743				F01D5.8	0.631161	0.0147467
				C29F7.2	1.50895	0.0140248				K10H10.10	0.630846	0.0173853
				rmd-2	1.5088	0.0128168				K09H9.8	0.630536	0.0236256
				npp-21	1.50858	0.00587452				Y73B6BL.36	0.629959	0.0081486
				T23G7.3	1.50856	0.0173447				K10D6.4	0.629863	0.015874
				jtr-1	1.50854	0.00795637				Y9C9A.8	0.628847	0.00440045
				sel-9	1.50846	0.00778888				F20B10.3	0.627201	0.0177397
				B0491.6	1.50835	0.0178893				C44H9.4	0.626313	0.0161949
				fars-3	1.50822	0.00608058				zig-2	0.626207	0.00699361
				ZK1058.3	1.5082	0.0163921				tir-1	0.625975	0.0211788
				K12C11.7	1.50818	0.00768791				nhr-21	0.625849	0.0125361
				nspd-1	1.50807	0.0681337				ZK1251.5	0.625608	0.369718
				pqn-70	1.50797	0.00934789				ric-19	0.62517	0.00641015
				C05C8.1	1.50777	0.00772175				Y43E12A.2	0.624049	0.00847551
				ZK380.5	1.50763	0.0325103				cbn-1	0.623952	0.00741893
				xpc-1	1.50734	0.0112179				cgt-1	0.623833	0.00840025
				mdt-4	1.50721	0.0152508				R02E4.3	0.623749	0.0126854
				H21P03.2	1.50709	0.00987495				C09D4.2	0.623599	0.0279721
				tag-299	1.50699	0.0106557				kpc-1	0.62354	0.0257623
				T02H6.11	1.50694	0.007682				gpa-6	0.62343	0.353434
				hke-4.1	1.50689	0.00637749				nas-31	0.623281	0.0244413
				vps-37	1.50683	0.00587452				T16H12.9	0.622643	0.00603064
				puf-12	1.50661	0.0432537				W02B12.13	0.622496	0.0127923
				arrd-7	1.50654	0.213451				eps-8	0.622151	0.0152601
				ZK809.3	1.50647	0.00882052				fos-1	0.621918	0.00460792
				R10D12.9	1.50565	0.0212493				cyp-13A3	0.62043	0.0288313
				T10F2.4	1.50473	0.00626514				mltn-12	0.62028	0.00639488
				T06D8.5	1.50468	0.018269				K11D9.3	0.618735	0.0311197
				C30H6.7	1.50436	0.00854316				prx-13	0.617988	0.0574707
				F46H5.7	1.50431	0.0327131				F46C8.3	0.617041	0.00704657
				ubc-14	1.50419	0.00772468				C37C3.7	0.617011	0.0172071
				F45D3.3	1.50419	0.0133298				C07A9.12	0.616624	0.015384
				cyk-4	1.50403	0.005971				K03H1.5	0.616392	0.0071027
				ins-7	1.50397	0.00639743				F30A10.11	0.616186	0.0126309
				taf-13	1.50363	0.00655416				fbxa-77	0.615775	0.0205185
				ugt-23	1.50345	0.00587452				K10G4.3	0.615239	0.0105962
				sams-5	1.50328	0.113931				T28B8.1	0.614804	0.0375693
				C02F5.6	1.50317	0.00807258				W10C8.4	0.614613	0.022893
				W01A8.5	1.50303	0.00689753				C18A3.10	0.614446	0.0240296
				oxi-1	1.5028	0.0103056				F13H8.1	0.613453	0.00446165
				rpn-11	1.50262	0.00587452				nhr-137	0.612742	0.0372782
				T04D3.8	1.50244	0.00770906				math-22	0.612235	0.0266846
				F40F8.11	1.50237	0.00689753				tax-6	0.611003	0.0193666
				C04G6.4	1.50231	0.0149963				T23B12.8	0.610804	0.0380414
				mrps-5	1.50224	0.0103407				T20D4.10	0.609981	0.00998351
				clec-223	1.50211	0.0129542				C01C10.2	0.609505	0.104455
				T22C1.3	1.50206	0.00795637				fmo-3	0.608963	0.0604585
				syx-18	1.50196	0.00615973				C29F7.1	0.608952	0.0415685
				E02H1.1	1.50196	0.0256106				Y110A2AL.3	0.608906	0.0183183
				B0511.12	1.50181	0.00872125				F44A2.3	0.608454	0.0285206
				C56C10.9	1.50159	0.0143081				snf-12	0.608352	0.0057204
				F42A10.6	1.50147	0.0438238				Y48G9A.9	0.607341	0.140077
				T20B12.3	1.50133	0.0171348				lact-5	0.606979	0.00902246
				sna-1	1.50115	0.00587452				gcy-15	0.606965	0.0182725
				bath-36	1.50084	0.0692376				B0285.6	0.606864	0.00493588
				obr-1	1.50084	0.0138019				R09A8.5	0.606717	0.0108002
				rnp-2	1.50081	0.0105549				F13B12.2	0.606164	0.055125
				rnp-6	1.50076	0.00599954				nhr-202	0.605919	0.00948731
				H20J04.9	1.50057	0.0126772				dep-1	0.605472	0.0443447
				hoe-1	1.50011	0.00709431				egl-3	0.60454	0.0496162
				Y69A2AR.1	1.49992	0.0079795				F09F7.7	0.603427	0.0356286
				T07F8.4	1.49987	0.0065395				F28H1.1	0.60301	0.00925301
				pnk-1	1.49986	0.0127942				spp-21	0.602772	0.00709365
				F56H1.6	1.49957	0.00797308				T02B11.4	0.602626	0.0219192
				C50B8.1	1.49943	0.00599954				W05E10.1	0.602237	0.0403411
				Y23H5A.2	1.49921	0.00784096				T05B11.1	0.601817	0.0157836
				F12F6.1	1.49885	0.00587452				gar-3	0.601275	0.00527946
				T01C3.9	1.49883	0.00587452				C05D10.4	0.601038	0.033744
				unc-108	1.49876	0.00587452				otpl-3	0.599612	0.00550785
				srp-2	1.49866	0.0336428				W10G11.3	0.599095	0.0153927
				F46F11.7	1.49839	0.0126094				K04A8.1	0.597941	0.0314005
				stl-1	1.49837	0.0220447				F27E5.7	0.596639	0.0100926
				C01F6.9	1.49817	0.00623812				F08G2.5	0.596631	0.015538
				R11A5.4	1.49809	0.00805826				T02B11.3	0.596604	0.471347
				C05C10.7	1.49782	0.00925054				nhr-59	0.594841	0.0048453
				C01G5.5	1.49761	0.0139925				ZC328.3	0.594639	0.0383004
				F42G8.10	1.4973	0.0108166				Y69H2.2	0.593508	0.00901252
				ragc-1	1.4971	0.00666689				Y113G7B.14	0.593333	0.0431076
				F12F6.7	1.49687	0.0114443				F44D12.2	0.593261	0.142292
				dnj-23	1.49685	0.00599954				Y71H2B.4	0.593122	0.265319
				C10G11.8	1.49658	0.105838				W07B8.4	0.592512	0.0301854
				knl-2	1.49656	0.00587452				C49H3.12	0.592053	0.0197292
				B0361.9	1.49642	0.00817388				dhs-5	0.591378	0.0369398
				C23H3.3	1.49628	0.0174266				Y69A2AR.7	0.59134	0.0236232
				his-62	1.49619	0.020881				ZK1240.2	0.590647	0.0396226
				ZK1127.3	1.49571	0.00766326				ZK813.4	0.590366	0.00693674
				C32D5.3	1.49565	0.00650764				nhr-120	0.590344	0.0048173
				W07E11.1	1.4956	0.00690932				clec-17	0.590166	0.0392667
				rpn-8	1.49556	0.00619191				ins-17	0.589815	0.0265513
				iftb-1	1.4949	0.00995412				K01C8.1	0.589572	0.0179159
				unc-57	1.4948	0.00886122				snf-11	0.589293	0.00978174
				mdt-29	1.49424	0.054848				drag-1	0.588878	0.0307771
				puf-5	1.494	0.00639743				B0284.1	0.588814	0.0166339
				secs-1	1.49399	0.0151547				ZC239.16	0.588709	0.0165199
				C07E3.9	1.49392	0.0187341				gst-13	0.58842	0.305453
				F22D6.8	1.49383	0.0225939				T28A11.2	0.586499	0.0149389
				gei-17	1.4938	0.0111476				sox-4	0.586427	0.019097
				T22D1.5	1.49375	0.00599954				gtl-2	0.58603	0.00726278
				ttr-2	1.49334	0.00594984				T03E6.12	0.585102	0.502399
				tbb-1	1.49309	0.00639743				twk-46	0.585006	0.0356642
				C12D8.1	1.49281	0.00785136				egl-21	0.584819	0.0279062
				cct-6	1.49274	0.00766326				Y57G11C.22	0.583632	0.00901055
				upb-1	1.49218	0.00599954				Y52B11A.12	0.583081	0.00502735
				F22B3.4	1.49199	0.00587452				dod-24	0.581702	0.205922
				C28H8.3	1.49199	0.0139568				fbxa-29	0.581459	0.0050104
				C14A6.10	1.49187	0.005971				T22F3.12	0.581181	0.0171295
				lrr-1	1.49177	0.00995933				nspc-10	0.580502	0.0379784
				F56G4.6	1.49177	0.0385819				Y42G9A.2	0.579592	0.0251
				ges-1	1.49165	0.0401847				thn-3	0.578856	0.00647331
				cyn-7	1.49133	0.0124808				T05E7.4	0.578748	0.0640344
				T05B9.1	1.49123	0.0207943				Y17D7B.2	0.578176	0.0255553
				T09A5.9	1.49121	0.00692672				ech-1	0.57801	0.0422375
				F58H1.3	1.49113	0.0107763				K02D7.5	0.576688	0.00942361
				riok-3	1.49107	0.00742019				pqn-94	0.576199	0.0279955
				lig-1	1.49104	0.00863263				ceeh-1	0.576009	0.323249
				F26F4.5	1.49104	0.0261113				sox-2	0.575386	0.00859362
				prg-1	1.491	0.00779441				Y54E5A.1	0.575367	0.0359732
				F20D1.3	1.49087	0.00599954				pmk-3	0.575026	0.0162949
				viln-1	1.49065	0.030113				F48C5.1	0.574134	0.0128747
				syp-3	1.49057	0.00727281				pvf-1	0.573838	0.00537029
				egg-3	1.49044	0.00615973				nhr-128	0.573821	0.0117502
				Y54E5A.6	1.49036	0.0123203				lpr-2	0.573754	0.0162817
				dph-1	1.49022	0.0118711				math-36	0.573361	0.0580947
				T28B11.1	1.49014	0.0178263				F52E4.5	0.573231	0.0288443
				cyld-1	1.49013	0.0113513				nhr-42	0.572969	0.0547335
				F53B6.4	1.49001	0.0638351				ZK593.2	0.572875	0.0654761
				Y71H2AM.5	1.48988	0.00934789				apm-1	0.57261	0.0296141
				Y48G8AL.7	1.48956	0.0129855				prx-1	0.572523	0.0463976
				mars-1	1.48944	0.00916283				gtl-1	0.572463	0.0968764
				his-45	1.48928	0.0284793				clec-218	0.572201	0.0109345
				pdi-1	1.48919	0.00587452				C56E10.3	0.572184	0.0165583
				Y52B11A.9	1.48903	0.00671342				brp-1	0.571821	0.0169624
				cct-2	1.48902	0.0133278				F09F3.8	0.571483	0.0109893
				hop-1	1.48871	0.005971				fbxa-188	0.570666	0.0112535
				K03B4.2	1.48842	0.0133085				aex-1	0.570424	0.0753909
				C24B9.3	1.48821	0.0138531				flp-20	0.570404	0.0124596
				Y43F4B.9	1.48806	0.0101694				dur-1	0.570402	0.0466274
				T23D8.3	1.48795	0.0109717				Y82E9BR.13	0.570147	0.0144903
				D1086.11	1.48768	0.0094583				M04C9.1	0.569717	0.00652582
				ndc-80	1.48763	0.00689753				lys-1	0.569294	0.0116353
				mdh-1	1.4873	0.00587452				nlp-27	0.568687	0.0178413
				mppb-1	1.48722	0.00881262				ZK262.2	0.568622	0.0486831
				mdt-19	1.48713	0.0140642				R01H2.7	0.568618	0.0194786
				let-2	1.48712	0.0108358				Y34F4.5	0.568462	0.0701252
				lars-2	1.48685	0.0186093				msi-1	0.56835	0.00688362
				nuo-2	1.48683	0.0144323				F16B3.3	0.568332	0.00974417
				Y23H5A.3	1.4866	0.00587452				unc-82	0.568199	0.00560573
				zwl-1	1.48656	0.00587452				ttr-24	0.567547	0.200444
				C31B8.4	1.48654	0.0422302				T01C3.11	0.567465	0.0127984
				K07E8.7	1.48654	0.00793128				Y43F8B.21	0.566635	0.0119844
				cyk-1	1.48648	0.008242				fbxa-85	0.565777	0.0109747
				sec-12	1.48638	0.00587452				C34C12.1	0.56487	0.570182
				ndx-7	1.48633	0.0180061				C34F6.11	0.563718	0.0470338
				nhr-99	1.48622	0.005971				F10E7.9	0.563578	0.00572393
				Y76A2B.5	1.48568	0.0100933				lfe-2	0.563537	0.044756
				his-74	1.48551	0.00639743				T13H5.6	0.563485	0.0267537
				Y38H6A.3	1.48524	0.0105102				F32D1.11	0.563326	0.0118717
				ZK616.5	1.48516	0.0119471				nnt-1	0.562706	0.0270378
				dpy-23	1.48507	0.00815284				gst-20	0.562175	0.0247852
				F55F3.2	1.48471	0.00727281				H20E11.1	0.562015	0.217879
				tag-304	1.4846	0.011504				pqn-37	0.561576	0.0433274
				Y71F9AL.8	1.4844	0.0239422				C17H12.6	0.561563	0.0308495
				Y41D4B.11	1.48433	0.0117299				F10A3.17	0.56132	0.0487244
				B0001.5	1.48424	0.0126865				R11H6.4	0.560167	0.0502298
				T14G10.7	1.48402	0.00676177				twk-33	0.558572	0.0298946
				cap-2	1.48401	0.0159205				F20A1.6	0.558045	0.0364495
				mei-1	1.48365	0.00608058				Y4C6B.3	0.557821	0.0176469
				ZK616.6	1.4836	0.00615973				F59A6.12	0.557529	0.0639352
				ZK1128.1	1.48324	0.00891044				F32A5.9	0.557085	0.068796
				lsm-1	1.48315	0.00587452				gsto-3	0.55627	0.0104407
				Y56A3A.18	1.48259	0.012746				egl-23	0.553983	0.00611662
				F53F4.11	1.48257	0.0192966				Y43F8B.14	0.553016	0.00528159
				cpf-2	1.48255	0.00708399				sgca-1	0.552563	0.036591
				C35E7.8	1.4825	0.031385				Y34F4.4	0.552339	0.025549
				vha-18	1.48241	0.00743277				cyp-35B2	0.552191	0.00969945
				F38E1.9	1.48228	0.00872885				maa-1	0.551942	0.0104123
				toca-2	1.48221	0.00692672				alh-5	0.551572	0.190081
				prk-1	1.48209	0.023652				nekl-3	0.551249	0.00687319
				T14B4.1	1.482	0.00768178				srw-21	0.551194	0.59802
				bath-28	1.4818	0.0114765				Y43D4A.7	0.551129	0.0187505
				ZK858.5	1.48164	0.0437431				B0563.5	0.55102	0.0211788
				Y14H12B.1	1.48149	0.0134378				F07C6.3	0.549452	0.0319326
				rps-2	1.48127	0.0355228				E03H4.8	0.549449	0.0110263
				sph-1	1.481	0.00698771				gst-24	0.549265	0.0283506
				F46F11.8	1.481	0.0117648				ZK84.1	0.549229	0.305384
				W04B5.3	1.48091	0.0386539				T23B12.11	0.548845	0.043321
				R11H6.5	1.48041	0.00708669				cki-1	0.54864	0.0143628
				snr-4	1.48039	0.0120143				F30A10.14	0.548489	0.209401
				R107.2	1.48034	0.00712334				nspc-11	0.548375	0.0263491
				K12H6.2	1.48033	0.0213432				hot-6	0.547324	0.00750074
				C49A9.9	1.48022	0.015275				B0416.7	0.547251	0.0204262
				rict-1	1.48002	0.00626832				T07D3.4	0.547223	0.153416
				T01C3.2	1.47934	0.0103344				H12D21.6	0.545488	0.0141754
				M05D6.2	1.47904	0.00625751				Y46H3A.4	0.545398	0.0205772
				ZK1225.7	1.47878	0.0126521				F11D5.7	0.545215	0.048798
				nuo-6	1.47876	0.0247261				nas-33	0.544882	0.0133714
				E04F6.8	1.47873	0.0069984				fbxa-6	0.544759	0.182129
				him-18	1.47844	0.00991365				C01C4.3	0.544617	0.0123504
				myo-3	1.47843	0.00937813				C38C10.3	0.544104	0.141232
				C44B7.5	1.47808	0.0129659				Y48A6B.8	0.543685	0.00611417
				pqbp-1.1	1.47795	0.00711956				nhr-275	0.543607	0.00700579
				hdac-6	1.47748	0.0114608				Y53G8AM.5	0.542509	0.104534
				pqn-96	1.47698	0.0140277				T27F6.8	0.541555	0.01862
				pssy-2	1.47668	0.00587452				abts-2	0.541187	0.0627547
				smc-5	1.47665	0.00654682				R186.1	0.540795	0.027764
				F47D12.6	1.47642	0.0749013				unc-43	0.540465	0.175567
				thoc-3	1.47635	0.00662674				C53D5.2	0.540377	0.0102766
				C44E4.3	1.47632	0.0104611				C53C11.2	0.539843	0.0151596
				Y75B8A.29	1.47621	0.0770569				nlp-6	0.539622	0.0268441
				C24H12.4	1.47604	0.0137831				M01G12.14	0.539504	0.0102945
				C14B1.6	1.47599	0.0115627				ttr-7	0.539164	0.0707467
				Y53G8AR.7	1.47588	0.0492292				K12C11.3	0.539128	0.0393837
				Y54F10AR.2	1.47588	0.00689489				ZK675.3	0.539044	0.00605053
				Y53F4B.14	1.47567	0.00722926				F54D5.3	0.538744	0.110691
				mei-2	1.47557	0.0102119				nhr-53	0.538642	0.00679519
				Y37D8A.19	1.47551	0.0198634				K11E4.2	0.538403	0.00846403
				ZK632.4	1.47551	0.00766575				F49H12.7	0.538056	0.00722305
				rnp-4	1.4754	0.0128168				nhr-133	0.537684	0.00759969
				mca-1	1.47533	0.0256844				F31C3.6	0.537249	0.0250843
				cpt-2	1.47526	0.0106537				F47G9.4	0.536097	0.0475179
				R05H5.3	1.47495	0.00770906				K09H11.1	0.535643	0.159124
				F33G12.2	1.4748	0.0100572				nhr-54	0.53554	0.00812858
				pdp-1	1.47468	0.00809669				W02D9.10	0.535303	0.0414635
				Y37B11A.2	1.47431	0.016275				fbxa-15	0.535259	0.0314843
				sand-1	1.47402	0.0062069				F01D5.5	0.534938	0.0154999
				T24F1.2	1.47402	0.00690932				F37C4.5	0.534561	0.0337127
				F09G2.2	1.47382	0.00692672				M04G7.1	0.534133	0.0265788
				Y67H2A.2	1.4738	0.00692672				odr-10	0.534013	0.0130305
				F41E6.9	1.47374	0.00587452				F26A1.9	0.534013	0.0111434
				dnj-18	1.4737	0.00710748				Y54G2A.41	0.533981	0.0809831
				inx-14	1.47297	0.0062069				fbxa-90	0.533429	0.043321
				lgg-3	1.47291	0.00615973				rcn-1	0.532985	0.0181957
				nspd-4	1.47282	0.105692				lact-4	0.532415	0.0170253
				Y48C3A.20	1.47213	0.0184333				F21C10.3	0.532216	0.040034
				T20G5.14	1.47204	0.0159089				Y40B10A.7	0.531286	0.0742324
				T12D8.10	1.47204	0.0116774				nhr-32	0.53088	0.0203488
				upp-1	1.47184	0.00619692				T27A10.6	0.530875	0.0413545
				C50F4.16	1.47134	0.0179355				tsp-13	0.530245	0.155162
				ubh-2	1.47125	0.00863263				T19C3.5	0.53001	0.0073562
				H43I07.1	1.47097	0.0454071				C54G10.4	0.529921	0.0271394
				sir-2.4	1.47092	0.00972433				C49A9.3	0.529582	0.249883
				sqv-4	1.47087	0.00895447				insc-1	0.5287	0.0187877
				D2030.4	1.47081	0.00807095				B0554.5	0.528691	0.0227406
				emb-27	1.47009	0.00767099				tag-278	0.528657	0.0213591
				smr-1	1.46999	0.00709431				nhr-94	0.528638	0.0107151
				csn-6	1.4697	0.0164255				K10D11.6	0.528552	0.0229643
				Y5F2A.4	1.46964	0.00865841				D2062.6	0.528304	0.240229
				F55A3.3	1.46957	0.00589707				mnm-2	0.52824	0.0298319
				air-1	1.46951	0.00587452				pgp-4	0.527801	0.0425958
				F54D1.6	1.46948	0.199336				fig-1	0.527767	0.0681867
				vps-33.2	1.46942	0.0101694				tbc-18	0.526682	0.0134913
				sod-2	1.46941	0.00599954				C07B5.4	0.526173	0.0134574
				F21D5.3	1.46921	0.0474917				F46C3.2	0.526122	0.0480474
				F25B5.5	1.4692	0.0180162				D1086.17	0.525986	0.151115
				Y54E5B.2	1.46905	0.0217812				Y106G6E.4	0.524751	0.0403397
				ral-1	1.46901	0.00772175				W03F9.4	0.524747	0.0545455
				F43D2.1	1.46898	0.00640916				Y57E12AR.1	0.524486	0.00768501
				tars-1	1.46896	0.00758699				D1007.19	0.524409	0.0228033
				let-70	1.46881	0.0165472				nhr-79	0.524024	0.0379124
				T04A8.8	1.46871	0.00883069				haf-7	0.524021	0.0182062
				C35D10.2	1.46846	0.100568				C26G2.2	0.522796	0.0109043
				lpl-1	1.4683	0.0172254				T23G11.1	0.521997	0.225752
				Y69A2AR.28	1.46818	0.00684371				skr-5	0.521841	0.0628497
				nasp-2	1.468	0.00977478				try-7	0.521013	0.830229
				C02F5.3	1.46799	0.00934789				rga-5	0.52085	0.0327029
				adr-2	1.46795	0.00770716				C06C3.11	0.520704	0.00860705
				asm-3	1.46778	0.0693836				F10D7.1	0.51984	0.00900265
				larp-5	1.46768	0.00587452				F26D11.12	0.519571	0.01323
				C18A3.3	1.46748	0.00891204				F54F3.2	0.519518	0.0497612
				cyn-10	1.46673	0.0081				F08G2.4	0.518593	0.102696
				C33A12.1	1.4667	0.0321153				pes-7	0.518286	0.0374127
				vps-33.1	1.4666	0.052923				acs-22	0.517142	0.493074
				drr-2	1.46648	0.0129088				srj-14	0.516501	0.0123099
				rrn-2.1	1.46587	0.00587452				T20G5.8	0.516324	0.00908782
				ZK856.8	1.46584	0.00968026				F56C11.6	0.516268	0.102016
				F08F8.9	1.4655	0.00726909				glc-2	0.51621	0.0561466
				F53F1.3	1.4653	0.0137729				R08D7.7	0.5159	0.081564
				pdhk-2	1.46525	0.00861929				Y57G7A.1	0.515784	0.0111135
				ril-1	1.46525	0.00744217				nhr-199	0.51554	0.127971
				ril-2	1.46518	0.013814				C49C8.3	0.515207	0.0601882
				F54C8.4	1.46509	0.00819601				F55A11.6	0.514753	0.120946
				alh-8	1.46493	0.00587452				F21C10.10	0.514353	0.137305
				pgl-2	1.46431	0.0141011				tyr-4	0.513801	0.0298133
				F28C6.4	1.46427	0.0185171				Y105C5B.7	0.513194	0.0166951
				tdp-1	1.46406	0.00623106				eat-2	0.513012	0.0104012
				F52H3.6	1.46377	0.164153				F02A9.1	0.513011	0.0221824
				B0336.7	1.46374	0.00619692				F36H12.3	0.512957	0.123347
				F10C2.4	1.46359	0.00631076				catp-2	0.512595	0.0373573
				wht-2	1.46352	0.00708399				mak-2	0.511367	0.00733015
				dpy-30	1.46349	0.0121462				F52E1.14	0.511037	0.161803
				erl-1	1.46348	0.0137264				F40H7.12	0.510842	0.0545396
				lpd-6	1.46347	0.047057				sem-4	0.510835	0.0194163
				F26F4.12	1.46318	0.00955164				F09C6.1	0.509268	0.0249795
				pbs-2	1.46317	0.00587452				B0302.5	0.509178	0.0156091
				act-4	1.46313	0.005971				ZC84.4	0.50917	0.0203116
				Y67D2.7	1.46308	0.0188325				srh-116	0.508605	0.512546
				stim-1	1.463	0.0122535				C15B12.4	0.507933	0.0181948
				MTCE.31	1.46294	0.0152593				C36C5.12	0.507417	0.0327879
				B0304.4	1.46282	0.0104452				Y17D7B.3	0.507019	0.0459585
				ZC395.10	1.46258	0.00842555				ckb-1	0.506367	0.0142681
				clec-41	1.46257	0.0539873				rbf-1	0.506335	0.0465558
				K08D8.6	1.46252	0.249085				mig-13	0.505543	0.0155245
				F10C5.2	1.46245	0.00692672				F40F12.8	0.505535	0.0770902
				sdha-2	1.4624	0.00898916				M04C9.4	0.505366	0.0188386
				F53E4.1	1.46227	0.0159096				akt-2	0.50384	0.0297018
				clpf-1	1.46218	0.00822324				K08D10.10	0.503715	0.120576
				prg-2	1.46186	0.0081				Y41E3.22	0.503704	0.0247016
				E01A2.1	1.46149	0.00667966				B0507.2	0.503701	0.108854
				F54E12.2	1.46147	0.00666689				C39B5.10	0.502697	0.0135549
				gpd-1	1.46136	0.00599954				E02A10.4	0.50268	0.0155317
				snr-1	1.46128	0.0101293				Y12A6A.2	0.502401	0.010301
				rpb-5	1.46106	0.00856915				F32G8.3	0.50235	0.150687
				xpg-1	1.46089	0.00933395				F42C5.3	0.501871	0.0389129
				T04H1.5	1.46081	0.0116012				F08A7.1	0.501366	0.0972691
				dnc-5	1.46071	0.00981549				F14H3.12	0.500942	0.518835
				pfd-1	1.46069	0.0117781				T19A6.4	0.500858	0.0219888
				zer-1	1.46058	0.00587452				K02E10.6	0.500855	0.0331844
				F10G7.5	1.46035	0.0208433				pbo-5	0.500776	0.0522603
				B0365.1	1.46013	0.0132236				ins-22	0.500308	0.0771811
				fbxc-47	1.46011	0.0414855				R09D1.10	0.500104	0.0165931
				cco-2	1.45997	0.00817388				T19H5.4	0.499653	0.0449076
				byn-1	1.45948	0.00820195
				F42F12.3	1.45946	0.0117648
				Y50D4C.3	1.45945	0.023132
				F36D4.5	1.45892	0.00628768
				cpsf-4	1.45874	0.0116799
				elpc-2	1.45868	0.0174758
				T01B7.5	1.45861	0.00846872
				C42C1.8	1.45855	0.00613261
				T05G5.9	1.45834	0.00615973
				D1014.4	1.45802	0.00770244
				Y38A10A.6	1.45802	0.00877634
				dpf-4	1.45794	0.010458
				T09F3.2	1.45786	0.0124809
				htp-3	1.45779	0.0090772
				C50D2.5	1.45776	0.00754582
				Y47G6A.21	1.45748	0.0081687
				C33C12.9	1.45746	0.0272347
				T07C12.9	1.45744	0.0233884
				arx-4	1.45739	0.00587452
				lpd-9	1.4573	0.00708669
				msh-2	1.45715	0.0121645
				dao-5	1.45713	0.00643131
				phip-1	1.45691	0.00680578
				F54C4.4	1.45677	0.0267157
				egg-2	1.45659	0.00708669
				vps-39	1.45644	0.00587452
				W04D2.4	1.45635	0.00646958
				C14C10.2	1.45628	0.0343781
				tag-77	1.45617	0.011258
				F57B10.3	1.45566	0.0136297
				C34C6.4	1.45559	0.0177534
				rad-23	1.45535	0.0113328
				ddx-23	1.45508	0.00833917
				F35G12.12	1.45504	0.00662199
				his-2	1.4547	0.00706163
				rpt-5	1.45469	0.00650824
				dhs-12	1.45468	0.0185052
				cogc-5	1.45468	0.00772175
				nmt-1	1.4546	0.00587452
				mtm-9	1.45458	0.00899018
				dnj-16	1.45444	0.00649428
				eif-3.K	1.4544	0.0107622
				lmn-1	1.45421	0.00929106
				F43G9.1	1.45391	0.00814706
				Y39A3CL.3	1.45389	0.0189772
				rab-39	1.45388	0.0107796
				M18.6	1.45354	0.00744217
				C08F8.3	1.45325	0.0105229
				Y62E10A.10	1.45316	0.00877331
				H36L18.2	1.45267	0.00587452
				Y66D12A.15	1.45251	0.00855134
				Y56A3A.11	1.45239	0.0123445
				puf-7	1.45239	0.00587452
				dnc-4	1.45236	0.00733021
				fipp-1	1.45218	0.00887717
				rsp-2	1.45212	0.005971
				npp-2	1.45206	0.01037
				T20D3.5	1.45196	0.0170821
				F32D1.5	1.45188	0.0113047
				cct-5	1.45187	0.00674585
				egg-4	1.45181	0.00625765
				rpb-3	1.45175	0.00830939
				F46C5.9	1.45173	0.00884927
				B0361.3	1.4517	0.00845003
				C30F12.4	1.45141	0.00765623
				clk-2	1.45121	0.0087027
				odr-4	1.4512	0.00708669
				C45G3.5	1.4511	0.00863263
				T08G11.1	1.45099	0.0138873
				C01G10.7	1.45079	0.0104078
				ant-1.3	1.45068	0.0391059
				ears-2	1.45052	0.0860037
				polq-1	1.45036	0.0216673
				ant-1.4	1.4503	0.0111511
				mtm-6	1.44944	0.0133213
				F59A3.12	1.44944	0.00655416
				C16C8.12	1.4492	0.0122719
				K01C8.7	1.4491	0.0119991
				C35D10.13	1.44866	0.0064341
				K01G5.8	1.44856	0.00850851
				his-37	1.44849	0.008622
				rbg-2	1.44846	0.0065825
				ZK1236.7	1.44846	0.0104214
				set-22	1.4484	0.00676748
				flh-1	1.44835	0.00587452
				icd-1	1.44823	0.014471
				Y65B4A.1	1.4482	0.005971
				ndx-3	1.44819	0.0222953
				Y48C3A.18	1.448	0.0227358
				rpl-11.2	1.44762	0.0213767
				ZK632.5	1.44758	0.0107052
				pbs-4	1.44757	0.00639743
				C37H5.5	1.4474	0.00754922
				M04B2.2	1.44733	0.0133124
				wht-7	1.44729	0.00934789
				F01F1.11	1.44726	0.0217829
				srp-1	1.44712	0.00737104
				C56C10.11	1.44649	0.0192219
				his-59	1.44644	0.00587452
				T23B12.6	1.44635	0.023355
				T10C6.6	1.446	0.00689489
				E04F6.9	1.44598	0.00615973
				nrf-5	1.44596	0.0335558
				nol-5	1.44592	0.0100037
				Y51H4A.15	1.44582	0.0160421
				aap-1	1.44579	0.0123264
				hsp-1	1.44577	0.0065825
				Y47G6A.14	1.44572	0.0106408
				sna-2	1.4455	0.00589707
				mes-2	1.44547	0.0146333
				act-1	1.44523	0.0105549
				C02B10.4	1.44519	0.0130371
				T10B11.6	1.44502	0.0121254
				F54D5.9	1.44493	0.0154696
				fut-3	1.44488	0.00890124
				F35E12.4	1.44472	0.459803
				Y54G11A.3	1.44468	0.00631126
				ZK863.4	1.44446	0.0129465
				ubc-25	1.44438	0.00689796
				C08A9.10	1.44414	0.0106557
				R12E2.12	1.44413	0.0103401
				C16C8.13	1.4441	0.00772468
				apc-16	1.44389	0.0086626
				Y54E10A.10	1.44376	0.00691608
				T05H4.6a	1.44373	0.00615973
				W05G11.6	1.4435	0.00587452
				Y74C9A.3	1.44348	0.00877634
				phb-1	1.44344	0.0201023
				ZK792.5	1.44333	0.0320208
				nmy-1	1.44317	0.00797308
				F52C9.7	1.44316	0.00708669
				Y87G2A.7	1.44301	0.00807258
				exos-9	1.44296	0.00692672
				cdk-8	1.44271	0.00969656
				C25H3.9	1.44268	0.00744695
				T09A5.5	1.44268	0.011098
				B0464.9	1.44253	0.00839039
				mcm-6	1.4425	0.00925225
				B0001.4	1.44242	0.00629001
				coq-6	1.44228	0.0179885
				pqn-59	1.44208	0.00709431
				acdh-3	1.44205	0.0245113
				pri-2	1.44205	0.0107796
				T23B3.1	1.44202	0.0108266
				Y55D9A.2	1.44199	0.00754816
				M03C11.6	1.44182	0.0263183
				ubh-3	1.44177	0.0109776
				uev-1	1.44173	0.00626832
				uri-1	1.44169	0.00734701
				F10B5.8	1.44166	0.00619365
				C16C10.2	1.44152	0.00940835
				T28D9.4	1.44133	0.00599954
				D1037.1	1.44129	0.00736223
				plk-3	1.44126	0.00589707
				F16B4.4	1.44124	0.00655416
				ZK1098.2	1.44096	0.00737104
				rpl-25.1	1.4409	0.0114141
				Y18H1A.2	1.44073	0.00726909
				lec-6	1.44046	0.137572
				K07C11.3	1.44024	0.0296621
				cup-5	1.44003	0.00639743
				F02D8.4	1.44	0.0127924
				F55A11.7	1.43981	0.02125
				mut-2	1.43976	0.00772688
				tag-322	1.43975	0.0129437
				ZK973.11	1.4397	0.00615973
				F54D7.6	1.43968	0.0114451
				eif-1.A	1.43962	0.011559
				ruvb-2	1.43944	0.0197911
				C27H6.8	1.4394	0.0121268
				bpl-1	1.43932	0.00710748
				exo-3	1.43922	0.0117108
				Y48A6B.3	1.43908	0.0112591
				ZK829.7	1.43906	0.0171348
				C23G10.2	1.43905	0.00762333
				Y49F6B.9	1.43895	0.00639743
				pas-4	1.43815	0.00637749
				K12H4.3	1.438	0.0120011
				pie-1	1.43792	0.005971
				R09B3.2	1.43772	0.0269616
				F39E9.22	1.43761	0.496852
				his-40	1.43753	0.00587452
				Y105C5B.5	1.43742	0.0197938
				ben-1	1.43737	0.0062069
				ZC155.4	1.43722	0.00689753
				R53.4	1.43706	0.0121254
				F33D4.5	1.43698	0.0133085
				H27M09.1	1.43655	0.0065395
				chch-3	1.43644	0.00587452
				vig-1	1.43643	0.021889
				C30B5.2	1.43614	0.00652923
				B0495.6	1.43569	0.00661778
				mdt-20	1.43545	0.0170417
				sbp-1	1.43538	0.00708669
				Y74C10AL.2	1.43517	0.00587452
				C01G8.6	1.43503	0.0117485
				Y52E8A.2	1.43481	0.024486
				acs-13	1.43457	0.00801245
				T13H5.5	1.43427	0.0101235
				glh-1	1.43413	0.00840245
				tut-1	1.43413	0.00846049
				cab-1	1.43399	0.0101054
				F56D2.2	1.43384	0.0119762
				F54D7.2	1.43381	0.00817388
				F42G9.6	1.43369	0.0159491
				F13G3.10	1.43367	0.0246086
				F59F4.2	1.43366	0.00587452
				F52C9.3	1.43345	0.0136741
				Y39G10AR.9	1.43335	0.00811189
				F55A3.2	1.43321	0.0127942
				F14H3.6	1.43316	0.00587452
				F44G4.2	1.43299	0.0065825
				C50E3.5	1.43285	0.0067246
				F32A5.9	1.43232	0.0141324
				R151.2	1.43229	0.00629001
				T13F2.9	1.43218	0.15031
				atg-9	1.43211	0.0120996
				tdc-1	1.43181	0.00587452
				mac-1	1.4318	0.0297746
				F43G6.11	1.43179	0.035643
				eri-5	1.43165	0.015004
				Y34D9A.1	1.43161	0.0064623
				lsm-3	1.43132	0.00742019
				drr-1	1.43115	0.0110146
				C05D11.7	1.43065	0.0161674
				Y57A10A.26	1.43053	0.00771596
				cdk-7	1.43041	0.00708508
				C40H1.6	1.43041	0.00717739
				rba-1	1.4304	0.00863263
				K06H7.3	1.43015	0.00587452
				mmcm-1	1.4301	0.00854495
				F56C11.3	1.42988	0.0197623
				C06E1.9	1.42948	0.00744577
				C55A6.10	1.42933	0.0298475
				C25A1.5	1.42923	0.00815193
				W02B12.11	1.42911	0.00674909
				mat-1	1.42895	0.0102062
				C15C8.7	1.42867	0.0123391
				ears-1	1.42864	0.0256372
				lec-4	1.42844	0.00587452
				Y75B8A.4	1.42823	0.0287061
				pgam-5	1.42809	0.0062069
				K07F5.15	1.4279	0.0106557
				C16C8.11	1.42778	0.0158272
				hrp-1	1.42744	0.00588109
				F39B2.3	1.42744	0.0171375
				dhs-30	1.4274	0.031943
				F52E1.14	1.42723	0.00844607
				F36A2.2	1.42714	0.00718638
				K07C5.2	1.42713	0.056487
				pph-6	1.42712	0.0069984
				C01G8.1	1.42706	0.00587452
				wdr-5	1.42695	0.00608995
				F53F4.14	1.42677	0.0126011
				C07H6.2	1.42664	0.00977662
				frg-1	1.42648	0.0215511
				R31.2	1.42638	0.0109487
				mdt-22	1.42633	0.0093634
				tag-65	1.4263	0.0163921
				cif-1	1.42629	0.00772626
				pfn-1	1.42629	0.00587452
				F53F10.2	1.42623	0.0124116
				T24A6.1	1.42623	0.0188439
				F26A1.1	1.42616	0.010699
				mdt-15	1.42609	0.0238487
				F08F1.9	1.42601	0.0159089
				Y45G5AM.7	1.42594	0.0119979
				F32A7.4	1.42576	0.016143
				F55A12.10	1.42556	0.0110475
				ufd-3	1.42546	0.00715485
				cgt-3	1.42539	0.0114071
				C24D10.6	1.42531	0.018436
				arx-2	1.42528	0.00731629
				nhr-49	1.42525	0.0138629
				Y66D12A.8	1.42521	0.00772175
				F54F7.3	1.42515	0.0267677
				cyn-11	1.42514	0.00650764
				K07H8.2	1.42511	0.005971
				C50F2.3	1.42506	0.0297338
				glh-2	1.42489	0.0065273
				rad-50	1.42487	0.0103056
				R05H5.4	1.42485	0.00961185
				F54C4.1	1.42479	0.00778827
				pqn-24	1.42478	0.0183044
				ntp-1	1.42462	0.0195786
				F40F8.1	1.42452	0.00655416
				clec-91	1.42449	0.00615973
				F07F6.7	1.42446	0.0274123
				unc-60	1.42432	0.00599954
				Y51H1A.3	1.4243	0.00708669
				mus-81	1.42422	0.0310161
				pyc-1	1.42416	0.00623106
				tag-72	1.42415	0.0107807
				atg-7	1.42415	0.00587452
				cnx-1	1.42403	0.0227358
				F33H1.3	1.42398	0.0369616
				fbxa-95	1.42382	0.0132669
				pqn-52	1.42378	0.0217517
				fnta-1	1.4237	0.0104611
				nduf-5	1.42353	0.0199092
				inx-9	1.42337	0.0181714
				C08B11.8	1.42329	0.00756466
				T01C3.3	1.42273	0.00647772
				D2030.3	1.42262	0.0104611
				F59E10.3	1.42262	0.0067246
				F26H11.6	1.42248	0.0158111
				adbp-1	1.42245	0.0117485
				cup-2	1.4224	0.00626832
				coq-2	1.42237	0.0356411
				npp-14	1.4223	0.00897979
				B0024.13	1.42225	0.00782594
				acl-6	1.42214	0.00919487
				F42C5.10	1.42201	0.0433657
				F44E5.1	1.422	0.0085877
				B0495.9	1.42185	0.00797308
				mtss-1	1.42184	0.00975321
				K07A1.1	1.4218	0.0121445
				C37C3.9	1.42146	0.0062858
				C24G6.6	1.42145	0.0138267
				clec-265	1.42143	0.325506
				Y106G6A.4	1.42097	0.214465
				ran-3	1.42093	0.00764164
				T07F10.3	1.42083	0.00999512
				W07G4.5	1.42075	0.0529766
				E01G4.3	1.42071	0.00587452
				cyl-1	1.42059	0.0301186
				hars-1	1.4205	0.0102119
				eak-7	1.42042	0.00715485
				abcf-1	1.42027	0.0115017
				F46F11.1	1.41999	0.0394691
				B0041.5	1.41966	0.00613685
				Y53G8AL.2	1.41925	0.0378762
				pptr-2	1.41907	0.00662674
				Y17G7B.3	1.41882	0.042746
				F47D12.9	1.41867	0.00678471
				clec-69	1.41829	0.198327
				T20F5.6	1.41821	0.00736223
				ZK1307.9	1.41818	0.00655416
				cpsf-2	1.41812	0.0249476
				Y61A9LA.11	1.41809	0.0101411
				ZK637.6	1.41784	0.00861698
				ned-8	1.41753	0.00587452
				C50F4.14	1.41737	0.00692967
				his-61	1.41726	0.00792899
				C33H5.8	1.41711	0.00797316
				ero-1	1.41703	0.0477584
				Y39B6A.34	1.41703	0.0230937
				cdk-1	1.41683	0.00793986
				dph-2	1.41651	0.0162641
				clh-1	1.41647	0.0282757
				F11E6.1	1.41641	0.0109964
				pro-2	1.41639	0.0148293
				Y71G12B.1	1.41627	0.021968
				vps-32.1	1.41609	0.00587452
				pgs-1	1.41584	0.0100933
				rfc-4	1.41578	0.0115414
				exl-1	1.41574	0.00786121
				Y71G12B.10	1.41552	0.00753845
				C03C10.4	1.41551	0.00968251
				unc-94	1.41544	0.0245138
				C47B2.2	1.41525	0.00694912
				ify-1	1.41511	0.00599954
				T01E8.1	1.41508	0.00674286
				C34D4.3	1.41498	0.147422
				F52F12.7	1.41488	0.00718638
				atg-16.2	1.41464	0.0136935
				Y48G9A.11	1.41448	0.0245152
				slx-1	1.41442	0.00690932
				F53A9.2	1.41437	0.413957
				ztf-28	1.41421	0.00744695
				C54G6.1	1.41419	0.0148134
				daf-18	1.4141	0.0141669
				set-29	1.41397	0.0108266
				T12G3.5	1.4138	0.0200535
				ets-4	1.41366	0.00602524
				prdx-2	1.41361	0.00866879
				K04G2.11	1.41361	0.049549
				F58B3.6	1.41359	0.00718638
				rpb-6	1.41314	0.0203683
				K04F10.3	1.41311	0.00698737
				unc-54	1.41311	0.0104611
				F53F4.3	1.41297	0.00655416
				R05H5.5	1.41277	0.0134077
				Y97E10AR.7	1.41277	0.00810119
				rrbs-1	1.41265	0.0219116
				ZK836.2	1.41238	0.0166093
				crml-1	1.41212	0.00587452
				pms-2	1.41211	0.011889
[truncated: 4,823 more rows]

## Sheet: Supplementary File 2d
Term	GeneRatio	Q value	geneID	Observed
response to topologically incorrect protein GO:0035966	0.25	8.3e-15	abu-10/abu-8/cdr-4/ckb-2/col-109/D2096.6/dsc-4/gad-3/gale-1/hsp-4/lec-8	11
IRE1-mediated unfolded protein response GO:0036498	0.14	2.9e-10	cdr-4/ckb-2/col-109/dsc-4/gad-3/gale-1/lec-8	7
defense response to Gram-positive bacterium GO:0050830	0.09	0.0098	gale-1/lec-8	2
ubiquitin-dependent ERAD pathway GO:0030433	0.044	0.063	hsp-4	1
gonad morphogenesis GO:0035262	0.046	0.063	gale-1	1
response to biotic stimulus GO:0009607	0.49	0.07	cdr-4/gale-1/lec-8	3
biological process involved in interspecies interaction between organisms GO:0044419	0.49	0.07	cdr-4/gale-1/lec-8	3
defense response GO:0006952	0.49	0.07	cdr-4/gale-1/lec-8	3
basal plasma membrane GO:0009925	0.058	0.07	dsc-4	1
pharynx development GO:0060465	0.059	0.07	abu-8	1
metal cluster binding GO:0051540	0.06	0.07	gad-3	1
unfolded protein binding GO:0051082	0.061	0.07	hsp-4	1
cuticle development GO:0042335	0.066	0.07	gale-1	1
DNA-binding transcription factor binding GO:0140297	0.073	0.07	hsp-4	1
flavin adenine dinucleotide binding GO:0050660	0.09	0.07	gad-3	1

## Sheet: Supplementary File 2e
upregulated genes by HK-OP50 (HK-OP50 vs OP50)		up genes pmk-1 dependent (409) from Fletcher et al., 2019		Common elements in upgenes pmk-1-dependent up by HK-OP50
gene_name		ZK896.5		ZK896.5
clec-2		ZK742.4		ZK287.9
K10D11.2		ZK287.9		ZK1037.6
F43G6.7		ZK250.13		Y97E10AR.1
R07E3.2		ZK1290.10		Y55F3BR.11
F55G11.7		ZK1127.12		Y51H4A.25
Y46G5A.28		ZK1098.1		Y45F10D.6
T04D3.8		ZK1037.6		Y43E12A.3
clec-163		zip-5		Y37A1A.2
fipr-13		Y9C9A.8		Y105C5A.8
F21E9.2		Y97E10AR.2		VZK822L.2
F36H1.11		Y97E10AR.1		ttr-59
gadr-2		Y7A9C.1		T24E12.5
sdz-9		Y73F4A.2		T24B8.5
fbxb-42		Y73B6A.1		T12G3.4
nspd-7		Y71G12B.6		T05A7.1
F56H6.2		Y71G12B.32		T04C12.7
grd-17		Y6B3B.9		T03F7.7
C04C11.25		Y69A2AR.25		swt-6
T25B6.5		Y62H9A.15		sulp-5
Y71H2AM.25		Y55F3BR.11		sta-2
col-84		Y54G2A.10		sqv-5
srpr-2.2		Y51H4A.25		slc-17.6
clec-45		Y51F10.4		rnp-8
Y38E10A.3		Y50D4A.4		R05H10.1
C28C12.1		Y47D3B.12		R04D3.2
ZC334.7		Y46D2A.2		pzf-1
F10D2.8		Y45F10D.6		pgp-6
B0563.9		Y43F8B.1		pgp-5
clec-47		Y43E12A.3		pcp-2
C54F6.17		Y42H9AR.5		nlp-29
VZK822L.2		Y42G9A.3		mul-1
B0348.10		Y39G8B.10		K10H10.10
T19D12.10		Y37B11A.2		K10D11.2
srh-61		Y37A1A.2		K08D8.5
ugt-35		Y32F6A.4		K05B2.4
ule-1		Y26D4A.21		hrg-4
fbxb-18		Y17G7B.8		hrg-1
clec-3		Y11D7A.10		hil-1
Y71A12B.15		Y105E8A.25		H06A10.1
vrp-1		Y105E8A.20		gpx-1
ZC239.20		Y105C5A.8		gale-1
fbxb-10		wdr-23		fipr-26
T28F4.3		W10G11.2		fbxa-89
C04G6.7		W05E10.1		fbxa-210
C37C3.17		W02G9.4		F55G11.7
F15E6.4		W02D7.5		F48C1.9
T11F9.10		VZK822L.2		F35E12.6
str-262		vrk-1		F31F7.1
W08E12.6		vms-1		F12A10.1
gly-14		vab-8		F11C7.6
F14D2.5		upp-1		ech-9
fbxb-1		ugt-55		drd-50
efn-3		ugt-40		dod-22
sdz-7		ugt-22		D2007.1
-		ubr-5		cyp-13B1
F41E7.20		twk-28		ctsa-2
F58E6.8		ttr-8		comt-4
C05H8.4		ttr-59		coel-1
ins-7		ttr-26		cnc-4
Y73B6BL.37		ttr-23		clec-85
F11A5.5		tni-3		clec-74
btb-8		tmem-231		clec-72
C13C4.12		tir-1		clec-67
F12E12.1		tbh-1		clec-45
C17E7.12		tag-290		clec-2
his-67		tag-260		clec-186
Y60C6A.2		tag-140		clec-125
C45H4.14		T28B4.4		cat-4
R02E4.3		T28B11.1		C55A6.6
C50E3.11		T24E12.5		C50F4.1
F19B10.2		T24B8.5		C45B2.1
M117.6		T24B8.3		C33H5.13
T28F4.7		T20D3.2		C32H11.9
clec-230		T19H5.4		C29F3.7
bath-4		T19D12.3		C17H12.8
T27A8.2		T16G1.6		C17H12.6
Y22D7AR.7		T12G3.4		C15A11.7
Y64H9A.2		fbxa-70		C06B3.6
F19F10.13		T12B3.4		best-1
ins-2		T10H9.8		B0546.4
F43G6.10		T08G5.15		B0416.7
Y116A8C.19		T05H4.4		B0416.7
oac-32		T05B11.4
sri-36		T05A7.1
Y49F6C.8		T04C12.7
C02E7.7		T04C12.3
clec-74		T03F7.7
Y39A3B.7		T02B5.1
kreg-1		T02B11.3
fat-5		T01C3.11
M03B6.4		swt-6
K04A8.21		sur-7
C50E3.12		sulp-8
fbxb-84		sulp-5
Y39C12A.2		sul-3
C32H11.9		str-131
Y106G6D.2		stdh-2
F09F3.8		sta-2
Y41D4B.14		srx-68
fbxc-34		srsx-34
lfor-1		sqv-5
rrn-3.56		sqst-5
Y25C1A.6		spp-11
fbxb-103		somi-1
snpc-3.2		slc-17.6
col-33		skn-1
cpg-3		sft-4
oac-6		set-1
F55G11.2		rnp-8
R12E2.7		rin-1
rgs-9		rft-1
col-173		rbd-1
chil-18		R13H4.2
M02E1.4		R11G1.2
F23A7.1		R05H10.1
C54E10.11		R05G6.10
ZK380.t2		R05D8.7
sdz-37		R04D3.2
D1005.5		R03G8.3
irg-5		pzf-1
puf-3		pud-2.1
hrg-2		ptrn-1
puf-5		ptr-13
R09D1.12		ptps-1
rme-2		psa-3
C10F3.15		pqn-92
F54E7.6		pqn-31
C50E3.13		pqn-18
oac-20		pnk-1
Y53G8AM.5		pgp-6
F40G9.15		pgp-5
Y66D12A.6		pgp-14
skpo-1		pgp-10
zeel-1		pcp-2
T25E4.1		pcm-1
dod-17		pbo-4
F48C1.9		pat-12
nlp-25		pan-1
fkh-3		ogt-1
C35E7.8		oac-59
F13A7.12		oac-5
F25H5.8		oac-3
linc-72		nspa-5
fbxb-66		npr-8
fbxb-100		nlp-5
skr-15		nlp-29
F32D1.7		nhr-88
C04G6.5		nhr-54
atf-8		nhr-34
fbxb-45		nhr-28
W06D11.3		nhr-228
ZK1037.6		nhr-128
F59H6.2		nhr-125
C17H12.8		nhr-107
K02F6.7		ncx-6
ptr-16		nas-5
K04G2.10		mul-1
C17E7.9		mtp-18
icmt-1		mtm-6
44623		mltn-10
C45B2.1		mig-2
cnc-2		mca-1
ZK287.9		M04G7.3
C45B2.8		M01F1.8
drd-50		lron-9
tbx-9		lit-1
cyp-35B1		lips-5
nas-38		lin-65
Y105C5B.5		lim-9
col-65		let-23
C02E7.6		lat-1
ent-5		lag-1
F18E3.12		ksr-2
F54D10.7		kin-20
F14H3.4		K11D12.13
Y39B6A.10		K10H10.10
ugt-18		K10D11.6
era-1		K10D11.3
pgp-5		K10D11.2
nas-15		K09H9.5
T24B8.5		K09C4.4
dhs-11		K09C4.1
Y65A5A.2		K08D8.5
ztf-28		K08B5.1
cpg-2		K05B2.4
R12E2.15		K04F1.9
egg-3		K03B8.8
F21C10.11		K02D10.4
Y43E12A.3		irld-53
Y23H5B.8		irld-35
arrd-8		irk-3
hrg-1		ipla-1
clec-125		hxk-3
ech-9		hum-2
skr-8		hrg-4
Y71F9AL.7		hrg-1
pzf-1		hoe-1
htp-2		hmp-2
M151.7		hlh-11
col-74		hint-3
C49F5.3		hil-1
F41F3.3		H24G06.1
F53A9.8		H23N18.6
F08F3.6		H20E11.2
R04D3.2		H20E11.1
C27D9.1		H14A12.5
try-1		H06A10.1
C50F7.5		gst-5
ttr-50		gst-25
Y46G5A.8		gst-21
sams-5		gst-14
col-97		gpx-1
R04D3.4		gly-18
T24C2.2		glb-33
Y110A2AL.2		gba-2
clec-91		gana-1
R12E2.14		gale-1
Y39A3A.4		fut-6
nlp-32		frm-9
cyp-33A1		frm-2
fbxb-72		fmo-2
Y49F6B.9		fkh-7
B0205.14		fipr-26
acs-2		fipr-22
T06D4.1		fil-1
pgp-6		fer-1
K05B2.4		fcd-2
anr-32		fbxc-7
F46E10.2		fbxa-94
F55G11.4		fbxa-89
ZK180.5		fbxa-83
T06E4.14		fbxa-78
clec-265		fbxa-210
irg-6		fbxa-190
dod-22		fbxa-127
T01D3.6		F59E11.5
hch-1		F59C6.16
C35A5.10		F58H1.3
col-62		F58G11.4
nspe-7		F56C4.4
ech-1.1		F55G11.7
cdc-25.3		F55G11.6
col-109		F55G1.15
F44F1.6		F54E4.3
dpy-3		F54C8.7
T25E12.6		F54C8.6
fbxa-215		oct-1
T22B7.3		F52B11.5
K08D8.5		F49H6.13
acdh-6		F49F1.7
col-14		F48C1.9
clec-85		btb-21
F15A4.10		F46H5.7
cyp-33D3		F44G3.10
K03D3.2		F42G8.10
ZK177.1		F42G4.5
C47D12.5		F42C5.4
lrx-1		F39E9.1
far-3		F37H8.3
puf-6		F37C12.10
C33H5.13		F37A4.2
skr-12		F36G9.3
F54D5.4		F35E12.6
lys-2		F35E12.10
gln-6		F35B12.3
gst-30		F32A5.8
K06A4.7		F31F7.1
nlp-29		F28H6.8
W05F2.6		F27D9.12
F53A9.6		F25B4.8
cey-3		F25A2.1
dod-24		F22B8.4
F55G11.8		F20D6.11
puf-11		F18E9.3
gyg-2		F17C11.10
hsp-12.1		F14H3.12
C54F6.5		F12A10.1
fbxa-89		F11C7.6
ztf-25		F09E5.14
col-48		F08G5.3
F11A5.9		F01D5.5
sod-5		eri-9
lbp-1		epg-4
W06B4.1		enpl-1
Y47D7A.13		egl-6
col-77		egl-13
R04D3.3		ech-9
ogr-2		E02A10.3
dct-17		drd-50
smf-3		dop-3
trcs-1		dod-22
meg-2		dod-21
Y48A6B.9		dnc-1
W02D7.11		dhhc-4
F14H3.6		del-6
Y39B6A.1		deb-1
lpr-7		daf-16
fipr-26		D2030.2
Y57A10A.5		D2007.1
htp-3		D1086.5
meg-1		D1086.2
C05C10.5		D1086.18
comt-4		D1007.3
cpg-1		cyp-44A1
T20D4.7		cyp-35A5
clec-88		cyp-35A4
cyb-2.2		cyp-35A3
clec-196		cyp-13B1
Y18D10A.11		cyp-13A6
C18D11.6		cyp-13A3
Y47H9C.1		cyn-6
neg-1		cutl-16
F16B4.4		ctsa-2
T01C3.3		ctl-3
cpar-1		csp-2
skr-10		crh-1
C17H12.6		comt-4
cyb-2.1		comt-2
fbxa-136		coel-1
mop-25.3		cnc-4
Y24F12A.4		clec-85
dpy-17		clec-74
clx-1		clec-72
col-58		clec-71
nas-6		clec-68
F20B10.3		clec-67
ZC155.4		clec-64
ceh-83		clec-58
cyp-13B1		clec-45
ZC308.4		clec-2
ZC434.8		clec-186
C35A5.6		clec-173
otpl-8		clec-143
F14H12.3		clec-139
B0304.2		clec-125
cut-2		cld-9
ugt-36		ckb-4
lgc-21		chat-1
T22D1.5		cfp-1
Y47D3B.6		ced-1
F14D2.15		cdkl-1
B0304.4		cat-4
gna-2		cas-2
clec-62		C55A6.6
fbxc-50		C53B7.3
oac-14		C52E2.5
sip-1		C51E3.10
C08F8.3		C50F4.1
rgs-11		C49H3.12
mct-5		C49G9.2
col-125		C48E7.1
ekl-7		C45G9.6
cbd-1		C45B2.1
srh-2		C45B11.6
arrd-1		C44C1.6
wago-1		C35B1.2
mei-2		C34H4.1
T05D4.2		C34C6.7
rga-3		C33H5.13
syp-2		C33D9.9
H10E21.4		C32H11.9
dhs-18		C32H11.1
C42C1.8		C32C4.1
EEED8.3		C31B8.7
lsy-27		C29F7.2
D2063.1		C29F3.7
skr-9		C27F2.10
ins-11		C23G10.11
egg-5		C17H12.8
C44B9.3		C17H12.6
K12D12.5		C17B7.10
asfl-1		C16H3.3
F53A9.7		C15H9.11
F55G1.7		C15A11.7
Y41C4A.32		C14H10.3
-		C14C11.4
hil-4		C13C4.6
clec-4		C13B4.1
szy-4		C10A4.10
nos-1		C08F11.13
W08E12.3		nhr-151
wago-4		C06B3.6
col-104		C06A8.8
ZK829.9		C05D9.9
skr-14		C05D12.1
C41G7.3		C05D10.4
C01B4.7		C05B5.5
clec-67		C02B10.5
Y49E10.4		brp-1
skr-7		blos-2
C49C8.5		best-1
Y46G5A.7		srd-14
asp-14		B0546.4
apx-1		B0416.7
F18E3.11		B0393.8
ptr-22		B0310.3
syp-4		B0034.1
col-113		B0001.8
fbxa-170		avr-15
puf-8		atg-13
flh-3		arrd-24
C01G8.1		ard-1
Y46H3A.4		apb-1
F10D11.6		acox-5
C45B2.2		acox-1
Y110A2AR.1		abts-3
clec-87		aat-6
R06B9.5		aakg-1
glp-1
gpdh-1
T05F1.2
Y43F8B.3
cey-2
cpg-8
cpg-4
F33E11.2
nspb-12
nlp-34
frk-1
mex-6
puf-7
Y87G2A.2
vglu-2
C08B6.4
fbxc-44
clec-78
C17E7.4
Y41G9A.10
F07H5.10
Y14H12B.2
Y87G2A.16
gln-5
Y11D7A.7
pos-1
F36H5.10
phat-5
clec-41
col-130
F19B10.10
B0284.3
F54F7.6
C49G7.12
spo-11
T12G3.6
ZK896.5
spsb-2
glc-1
immt-2
nspe-1
F16C3.2
ZK1053.4
T05H10.4
btb-6
F12A10.1
F58H1.2
dpy-14
egg-6
clc-1
C53C11.2
F18A1.7
Y73B6BL.23
clec-66
cnc-6
F31B9.3
tag-234
glh-4
ZK662.2
C30F12.3
C29F3.7
F08G12.5
F54B8.4
R144.10
E04F6.8
F25D1.5
pid-1
ZC190.6
F56F11.4
sqt-3
spn-4
C01G6.3
glh-2
gba-1
rnp-8
E02C12.6
tag-297
R74.2
F56C9.6
glf-1
ZK896.4
F02E8.4
C06A1.4
clec-266
Y60C6A.3
meg-3
F09E10.15
set-32
Y71G12B.2
Y75B8A.28
abu-10
hmg-3
C14B1.9
fbxa-107
T02B11.6
Y4C6B.4
nos-2
cht-1
pgl-1
sepa-1
T21C9.13
Y37A1A.2
lonp-2
clec-17
maoc-1
C38D4.4
C06G1.1
dpy-7
prom-1
C31H1.8
ZK1320.3
meg-4
dao-2
C25E10.5
col-115
Y111B2A.2
F27E5.7
lron-2
ttr-51
F53F8.3
Y55F3BR.2
F55A11.8
F35B3.4
grl-21
ptr-2
C14C11.2
ZK970.7
pqn-71
C39H7.2
R10E9.3
gpd-1
gld-3
Y18H1A.9
T24C4.4
C33A11.2
F26G1.5
phg-1
oac-31
htp-1
trx-3
Y54G9A.5
F53C11.3
toca-2
W05F2.3
F20G2.5
cyp-32B1
deps-1
Y65B4BL.4
mul-1
C30G12.6
Y45F10D.6
grl-16
ugt-19
fbxc-51
memi-1
elli-1
nas-10
T10E10.4
clec-63
T07A5.5
qua-1
abu-8
hpo-6
T09B9.1
T06D8.10
F30H5.3
C29A12.1
set-22
sun-1
him-14
dsb-2
fbxc-36
Y54F10AM.11
prx-11
hrg-7
hphd-1
set-24
C08E8.4
D2030.7
E01G6.1
ego-1
clec-65
ZC395.5
C10C5.2
nlp-28
Y56A3A.33
col-111
Y106G6D.1
cpb-3
K02B7.3
C35E7.5
K08H2.3
F56C9.3
gpx-1
F36A2.3
Y71F9AL.2
F13D12.5
gsto-1
F26G5.1
zif-1
lpr-3
nhr-11
Y58A7A.4
D2096.6
cnc-11
inx-22
cpt-5
C06A5.8
C25H3.1
C35A5.3
F22H10.3
lips-1
F18E3.13
grsp-2
mex-1
Y77E11A.2
F20C5.10
nlp-26
D1081.7
Y54G11A.3
gld-1
pals-23
syx-4
C08E8.3
pph-4.2
B0261.7
ZK550.6
grsp-1
hil-5
R07B7.2
R08F11.4
oma-2
ces-2
ndx-8
C55B7.11
B0238.9
T17H7.7
clec-187
ugt-44
gst-33
scrm-4
far-7
T19B10.2
nhr-112
daf-6
col-165
B0024.4
DY3.8
dct-16
C42D4.3
T05H10.3
F55C12.19
K07F5.12
F59G1.8
Y54E10A.12
ugt-31
F56C11.6
Y42H9B.3
fog-2
F35C11.5
lips-15
F28H1.4
F58G11.3
F43C1.7
hrg-4
him-3
C18H9.5
R13H4.8
gei-14
W09G12.7
daz-1
F57B10.4
F54D10.5
gla-3
T01D1.3
F53C11.1
F49F1.5
alg-5
nhr-53
T05A7.1
zim-2
T04C12.7
sulp-5
slc-17.6
C37A5.6
pcp-2
D2021.4
mom-2
C06E4.3
tsp-1
C18H7.1
K01A6.4
Y43D4A.5
pie-1
R13A5.7
C08F1.10
W06D11.1
dhs-23
EEED8.15
C55B6.1
lgc-22
npax-2
lec-6
Y22D7AL.15
W02A2.9
fbxa-38
plk-2
sygl-1
fmo-4
edg-1
dhrs-4
R05H10.1
sto-1
T09F5.12
clec-83
glh-3
T21H3.1
D2007.1
F32D8.7
cyp-34A7
B0403.5
heri-1
hrde-1
Y51F10.2
H06A10.1
F26D11.12
T19H12.2
tbb-6
C26F1.1
F55B11.4
ugt-16
odc-1
fbxc-32
Y106G6H.6
col-121
F21C10.10
har-2
T05B9.1
set-9
mex-5
lam-3
ctl-2
Y53G8B.2
C06B8.7
K11H12.4
maph-1.2
mbtr-1
B0205.13
T07D3.9
inx-21
F28F9.3
T10B11.8
ubc-8
C49F5.7
asp-6
nas-30
pgl-3
H02F09.3
B0285.3
W03F9.4
lys-8
tbc-6
plpp-1.2
kca-1
Y71H2B.4
F53A9.1
ucr-2.3
T02G5.14
C15A11.7
acds-10
W01F3.2
coel-1
clec-186
flh-1
C35C5.8
W09G10.9
F26G1.2
dhs-14
lips-10
C48B4.9
M28.8
T23B12.5
pho-8
cyp-13A10
dhs-28
kbp-4
acs-20
Y73B3A.1
F01D5.1
mtl-1
inx-3
nhr-211
icl-1
C36A4.11
T11B7.2
T07D10.8
irg-1
ckb-2
C35C5.9
C27B7.9
oma-1
C31C9.2
acs-11
T28H10.3
mlt-11
Y39G8B.9
T27F6.8
T16G1.5
Y95B8A.2
F08F8.4
vet-2
ptr-4
W08A12.2
F23F12.12
ttr-37
Y47H10A.5
fbxa-24
F58A6.1
daf-22
H11E01.2
F59B10.4
abhd-3.1
sdha-2
F45F2.11
Y17G7B.10
irg-3
D2005.4
bath-41
T23F2.3
T26H5.9
C49G7.10
Y40B10B.1
R09E12.9
cyp-35A2
Y37A1B.5
F35G12.5
pals-24
tts-1
tsp-2
R05D7.5
maa-1
D1086.9
cyn-9
got-2.1
atg-9
tre-5
nhr-119
cpg-7
fubl-4
fbxa-210
F54D5.9
ZK616.5
sdz-8
nasp-2
pgph-3
Y38F2AR.12
acox-1.1
Y87G2A.25
tag-244
Y37D8A.16
Y48G1A.2
cut-3
Y52B11A.8
F46A8.13
F44F4.3
lys-3
F48D6.4
C25H3.10
aqp-8
cdc-25.1
let-99
K10H10.10
F32D8.11
endu-2
K07A1.17
ani-2
T24E12.5
F21H7.12
mlcd-1
EEED8.14
C34H4.2
fat-7
cyk-7
far-4
dhhc-10
ZK84.1
F40E3.5
irg-4
R09B5.11
impt-1
cav-1
ugt-29
ttr-45
nnt-1
clec-72
F22H10.2
F11C7.6
C46A5.6
C41D11.9
pssy-2
E03H4.8
pigv-1
pals-27
F30F8.1
T07C4.3
chs-1
gad-3
F13D12.3
F35H8.2
Y43F8C.3
Y25C1A.13
gpx-2
cnc-4
C37A5.3
F28C10.3
C37C3.9
gpdh-2
valv-1
C30B5.6
cyp-35B2
F22F7.2
Y55F3BR.11
K01A2.10
T13F2.6
spl-2
F35E12.6
B0454.6
Y51H4A.25
asp-3
bcmo-2
dhs-9
cng-1
nlp-50
rom-1
R10D12.1
C25A11.2
F14F9.4
M02H5.8
ram-2
pals-26
ZK1320.2
C18H9.6
xnd-1
cpz-1
C23H4.6
acox-3
C11G10.1
C50D2.1
drr-1
tag-120
tofu-1
K07E8.6
twk-34
cbp-2
C06A5.6
H41C03.1
cTel55X.1
emre-1
cyp-13A12
lys-1
noah-2
C42D8.1
gem-4
set-5
T28B8.1
fbxc-41
Y38E10A.14
K06A9.2
bath-47
cat-4
F32D8.12
dpy-2
nhr-3
fbxa-37
ttr-7
C50F4.9
W09D10.4
fbxa-69
F32H5.1
mrp-7
inx-11
oef-1
T25F10.3
vamp-7
cyp-13A5
F25E2.3
B0416.7
cyp-33C4
R148.5
cup-16
C31H5.4
C15H9.4
gpd-4
catp-1
abu-14
hxk-1
Y58A7A.3
srr-6
acs-17
ugt-54
srw-86
spp-2
col-107
swt-6
Y60A3A.19
aex-5
F32H5.3
44805
C09H10.5
M162.5
Y111B2A.3
acdh-10
asm-1
Y73C8B.1
ZK1320.9
Y34D9A.8
cpt-1
DH11.2
C09E9.1
F53A2.9
Y110A2AL.4
lec-9
hil-7
col-101
T23B12.8
faah-6
Y54G11A.7
Y71G10AR.4
mek-1
K10D3.6
Y54G2A.45
Y57E12AR.1
ddo-1
F47E1.2
Y51A2D.13
cup-14
E04F6.9
nas-9
clp-9
nhr-101
nhr-13
Y97E10AR.1
sedl-1
lst-1
R04B5.5
T20B3.1
acbp-1
abhd-14
Y54G2A.11
C44B7.12
C18A11.3
nduf-2.2
B0001.7
D1046.2
F52E4.5
F42G2.2
ugt-13
F59A7.2
lpr-2
klc-1
str-176
fmo-3
gtf-2E1
T04C4.1
plin-1
Y48G8AL.13
fat-6
Y73B6BL.31
K02D7.1
B0238.12
C55A6.6
Y34F4.5
ZK822.5
F21D5.1
mei-1
C06B3.6
ZC443.3
acdh-7
C36B1.11
C36B1.14
nhl-3
F52E1.14
thk-1
T12G3.4
sta-2
K01G5.8
mrp-5
T01C8.2
W04A8.4
F41G3.6
lid-1
ctsa-2
T22F3.11
nac-1
K06G5.1
Y57A10A.31
dhs-30
Y95B8A.6
pod-1
nhr-243
cbp-3
ceeh-2
C46H11.2
hex-5
ZK673.2
cyp-33C8
siah-1
ZK1055.7
ima-1
gbh-1
F43G6.8
cyb-1
T26C5.3
mlh-1
ZK370.4
Y53F4B.39
F26F12.3
kel-20
T04D3.5
C05D2.11
F17C11.4
tsp-10
memo-1
B0272.4
gstk-2
Y39E4B.6
F09C8.1
F54D5.3
dod-19
gst-7
T03F7.7
ari-1.4
F58B3.6
nhr-21
Y105C5A.8
dvc-1
Y69A2AR.3
acdh-11
F18C5.10
nhr-202
K01A2.5
acs-19
xbx-6
swt-7
Y54G2A.52
ZK1290.14
ech-8
gfat-1
nlp-31
Y71F9B.9
C09B8.4
glt-5
F41E6.5
Y43C5A.3
henn-1
cyp-32A1
hil-1
nhr-206
ltah-1.2
nhr-131
cox-7C
Y75B8A.3
lec-8
C50F4.1
acd-2
tasp-1
exc-6
F34H10.3
nlp-24
hic-1
dct-1
mom-5
C16B8.3
tat-4
F53B2.8
polg-1
K09F6.9
ttr-15
ikb-1
cutl-23
gale-1
rrf-2
hsp-4
dif-1
K09E4.4
sodh-1
nipa-1
unc-71
misc-1
R05A10.1
clp-7
B0410.3
dab-1
dcar-1
Y71H2AM.13
Y65B4A.2
daf-18
pck-2
ttr-59
tts-2
spg-20
pdxk-1
dsc-4
paf-2
oac-46
C14A11.2
W07G4.5
F27D9.2
rmd-2
ipla-6
ZK973.1
aqp-1
dhs-6
tam-1
B0546.4
F46G10.1
psd-1
col-39
nhr-96
C17C3.1
dod-3
F13C5.1
best-1
nfx-1
msh-6
B0001.2
scl-2
ZK632.4
Y44A6C.1
F35E12.9
C18A11.1
F41C3.2
M05B5.4
clp-4
pyk-2
ZK355.2
nmad-1
epg-6
Y53F4B.45
srr-4
ephx-1
T05E11.9
F25B5.3
F37A8.5
prx-13
obr-1
acs-7
allo-1
atg-16.2
pmp-2
K07D4.9
F10D7.5
F48F7.5
W06F12.2
F19C7.1
ced-6
alh-4
F26H9.5
acdh-9
cdr-4
M176.4
mak-1
W01A11.1
T06D8.9
tric-1B.1
spsb-1
uda-1
lem-4
nuaf-3
zfp-3
nhr-274
fbxl-1
ape-1
Y56A3A.18
sqv-5
gcl-1
pccb-1
T19D12.4
F31C3.6
Y41E3.8
Y53C10A.5
cpr-3
F15D3.6
natc-2
ttr-41
T10F2.2
F31F7.1
jmjd-2
nhr-61
F32B5.6
nex-2
lgg-2
ttr-6
acs-14
B0334.3
let-721
M7.12
sax-1
C06A5.3
T26A8.4
tag-304
Y48A6B.7
F22D6.2
gsr-1
obr-4
F59B1.2
his-71
ctn-1
acaa-2
lgg-1
