# Supplementary material for: UPRER–immunity axis acts as physiological food evaluation system that promotes aversion behavior in sensing low-quality food
Source: eLife. 2024 Sep 5;13:RP94181. doi: 10.7554/eLife.94181 (PMC11377039; doi:10.7554/eLife.94181)
Supplement: Supplementary file 3. [file elife-94181-supp3.xlsx]

## Sheet: Supplementary File 3a
Screening data for E. coli mutant keio library.
Methods:The bacteria were then heat-killed following our established protocol 24, and 150 ul of the heat-killed the mutant E. coli was spread onto 3.5 cm NGM plates. Synchronized L1 worms carrying UPRER reporter (Phsp-4::GPF) were seeded and cultured for 24h at 20℃. The fluorescence was then examined by using an Olympus MVX10 dissecting microscope, progressive screening three times. next, an 4th …
1st screening by UPRER marker						2nd screening by UPRER marker based on 1st					3rd screening by UPRER marker based on 2nd					immunity marker screening based on 3rd					avoidance screening based on immunity marker screening
Plate	Row	Col	gene name	level of ER stress		Plate	Row	Col	gene name		Plate	Row	Col	gene name		Plate	Row	Col	gene name		Plate	Row	Col	gene name
69	A	3	yojL	☆☆☆☆☆☆☆		9	B	10	yfbR		9	B	10	yfbR		9	B	10	yfbR		9	B	10	yfbR
55	B	1	modB	☆☆☆☆☆		11	A	1	eutP		12	A	1	eutP		12	A	1	eutP
55	D	1	ybhL	☆☆☆☆☆		13	B	1	yeeE		14	B	1	yeeE		14	B	1	yeeE
9	B	10	yfbR	☆☆☆☆		17	H	1	yciS		17	H	1	yciS		17	H	1	yciS
51	D	3	edd	☆☆☆☆		21	G	8	yejH		26	H	10	yliG		63	F	1	pspD
51	C	6	hcaF	☆☆☆☆		25	H	10	yliG		55	B	10	mglC		67	A	1	yjgX
53	G	3	nfo	☆☆☆☆		25	H	12	wcaJ		63	F	1	pspD		67	G	5	ykgC
53	B	10	sspB	☆☆☆☆		27	E	1	asmA		67	A	1	yjgX		67	H	2	hisL
69	G	1		☆☆☆☆		27	E	7	crcB		67	F	4	ligT		73	D	11	yaeI
21	G	8	yejH	☆☆☆		37	A	9	yjcD		67	G	5	ykgC
23	E	3	ycgM	☆☆☆		67	A	1	yjgX		67	G	7	ssuC
27	E	7	crcB	☆☆☆		67	F	4	ligT		67	G	8	dsbB
55	B	5	sapB	☆☆☆		67	G	5	ykgC		67	H	2	hisL
59	B	1	mtr	☆☆☆		67	B	6	ykiB		69	H	3	yfgG
67	D	1	yjiQ	☆☆☆		67	H	6	nmpC		73	D	11	yaeI
89	D	2	yjiP	☆☆☆		67	G	8	dsbB		74	A	3	yjgX
89	A	8	yhjX	☆☆☆		67	D	9	ymjB		74	D	10	yfdI
13	D	3		development		67	G	10	ynfN		74	D	5	yjjA
11	H	11	yecR	death		69	C	4	rimM		82	C	11	yeeV
69	C	4	rimM	☆☆☆☆☆☆		69	H	4	exo		89	D	9	ypfH
9	A	10	yfbP	☆☆☆☆☆		73	A	3	yjgX
15	D	1		☆☆☆☆☆		73	D	5	yjjA
15	E	1	yneG	☆☆☆☆☆		73	D	10	yfdI
15	F	1	yneK	☆☆☆☆☆		73	D	11	yaeI
15	E	2	yagB	☆☆☆☆☆		81	A	8	ybcL
15	F	3	yahE	☆☆☆☆☆		81	B	8	ychE
35	A	6	yhfX	☆☆☆☆☆		81	C	11	yeeV
51	F	4	napC	☆☆☆☆☆		83	H	11	phnH
53	E	8	ycgE	☆☆☆☆☆		87	E	11	ygeO
53	B	9	mlrA	☆☆☆☆☆		89	D	2	yjiP
67	D	11		☆☆☆☆☆		89	A	8	yhjX
87	C	6		☆☆☆☆☆		89	D	9	ypfH
15	H	8		☆☆☆☆
15	E	10	ybiU	☆☆☆☆
43	A	5	pdxH	☆☆☆☆
51	A	12	malS	☆☆☆☆
51	D	12	mtlD	☆☆☆☆
51	F	12	grxC	☆☆☆☆
55	B	10	mglC	☆☆☆☆
55	F	11	rbsC	☆☆☆☆
65	E	2	asnB	☆☆☆☆
67	D	9	ymjB	☆☆☆☆
67	G	12	yedO	☆☆☆☆
79	H	12	xerD	☆☆☆☆
83	H	1	ydfE	☆☆☆☆
87	B	7	pcnB	☆☆☆☆
9	D	4	dacB	☆☆☆
11	C	10	yebO	☆☆☆
17	G	9	ydjM	☆☆☆
23	B	11	mdtK	☆☆☆
29	C	12	ruvB	☆☆☆
57	D	11	yqeG	☆☆☆
57	H	11	pitB	☆☆☆
69	B	6	ygfT	☆☆☆
73	D	11	yaeI	☆☆☆
11	H	10	yobB	☆☆
15	A	1	ydcE	☆☆
15	H	2	yagU	☆☆
21	F	9	yfbB	☆☆
25	H	10	yliG	☆☆
31	E	9	ycgY	☆☆
51	G	2	rsxE	☆☆
53	F	4	purN	☆☆
55	C	4	nhaB	☆☆
55	B	8	chbB	☆☆
55	C	8	ydjE	☆☆
55	F	8		☆☆
55	H	8	znuB	☆☆
55	B	9	araF	☆☆
57	F	2	ytfF	☆☆
63	F	1	pspD	☆☆
63	A	6	rfaE	☆☆
67	E	4		☆☆
67	B	6	ykiB	☆☆
73	C	6	ygfA	☆☆
73	D	10	yfdI	☆☆
87	F	11	prfB	☆☆
25	H	12	wcaJ	☆（develo[ment)
5	B	2	glnG	☆
5	C	2	glnL	☆
5	B	3	dcuR	☆
9	D	3	ygeY	☆
9	A	4	agaR	☆
9	F	11	yfdX	☆
11	A	1	eutP	☆
11	A	3	yfjK	☆
11	G	4	ygaM	☆
11	C	12	yedD	☆
13	A	4	yccE	☆
13	A	6	ycfT	☆
13	G	6	ymfQ	☆
13	G	7	yciC	☆
13	B	8	yciG	☆
15	C	1	yddG	☆
15	E	4	yaiW	☆
15	A	9	ybfB	☆
17	H	1	yciS	☆
21	H	5	yagS	☆
21	D	6	ymdB	☆
25	A	1		☆
25	A	2	yedL	☆
25	A	3	yqcA	☆
25	A	5		☆
25	E	10	ybiV	☆
25	F	11	ycaJ	☆
25	E	12	yccW	☆
27	A	1	wcaI	☆
27	C	1	wcaE	☆
27	E	1	asmA	☆
27	B	5		☆
27	F	5	ygcO	☆
27	F	6	rof	☆
27	A	7	cof	☆
27	C	7	uspG	☆
27	D	9	yffI	☆
27	B	12	yajO	☆
37	H	2	cbrC	☆
37	A	9	yjcD	☆
37	B	9	yjcE	☆
41	E	4	aspC	☆
45	A	2	flhB	☆
45	C	3	fliK	☆
45	C	6	rfaG	☆
45	A	7	rffD	☆
47	A	1	gspG	☆
47	E	1	fkpA	☆
47	E	2	yahI	☆
49	C	2	ymcE	☆
49	G	6	rihA	☆
49	A	11	hyaB	☆
57	B	4	queA	☆
57	G	5	selD	☆
57	E	6	hyfD	☆
57	F	8	ptsH	☆
57	H	8	crr	☆
57	D	9	acrD	☆
57	B	11	fucP	☆
65	C	3	mdoH	☆
65	D	3	oppC	☆
67	A	1	yjgX	☆
67	H	2	hisL	☆
67	A	3	pheL	☆
67	H	3		☆
67	F	4	ligT	☆
67	H	4		☆
67	G	5	ykgC	☆
67	G	6		☆
67	H	6	nmpC	☆
67	A	7	citF	☆
67	C	7	tolB	☆
67	E	7	hcr	☆
67	G	7	ssuC	☆
67	C	8	ycdN	☆
67	G	8	dsbB	☆
67	F	10	ynfO	☆
67	G	10	ynfN	☆
67	A	11	ynfF	☆
67	E	11	ydhX	☆
69	H	1		☆
69	H	3	yfgG	☆
69	H	4	exo	☆
69	H	5	yqeC	☆
69	F	6		☆
69	H	7	hybF	☆
69	F	9	yhaO	☆
71	D	8	yhhL	☆
73	A	3	yjgX	☆
73	D	5	yjjA	☆
73	C	7	yqhG	☆
81	A	8	ybcL	☆
81	B	8	ychE	☆
81	C	11	yeeV	☆
81	B	12	yehD	☆
81	C	12	setB	☆
81	G	12	yfdP	☆
83	A	1	yfdY	☆
83	C	1	yfgI	☆
83	G	1	ycgZ	☆
83	C	7	yjaA	☆
83	H	7	yjiZ	☆
83	C	8	astC	☆
83	H	8	ecpD	☆
83	B	10	rfaC	☆
83	B	11	glcG	☆
83	D	11	sgbE	☆
83	E	11	phnO	☆
83	H	11	phnH	☆
83	G	12	wbbJ	☆
83	H	12	glf	☆
87	A	2		☆
87	C	2	yrfD	☆
87	D	2	yrdA	☆
87	D	3	yjiA	☆
89	D	9	ypfH	☆
89	E	9	ygcW	☆
89	A	10	rplA	☆
89	B	11	lpxL	☆
89	E	11	proY	☆
