# Supplementary material for: UPRER–immunity axis acts as physiological food evaluation system that promotes aversion behavior in sensing low-quality food
Source: eLife. 2024 Sep 5;13:RP94181. doi: 10.7554/eLife.94181 (PMC11377039; doi:10.7554/eLife.94181)
Supplement: Supplementary file 4. [file elife-94181-supp4.xlsx]

## Sheet: all sample data
								HK-K12				HK-yfbR				Live-K12				LB broth				sample mix
Index	Compounds	Class I	Class II	Q1 (Da)	Molecular Weight (Da)	Ionization model	Formula	HK1	HK2	HK3	HK4	HY1	HY2	HY3	HY4	Con1	Con2	Con3	Con4	LB1	LB2	LB3	LB4	mix01	mix02	mix03	mix04	cpd_ID	HMDB	Pubchem CID	CAS	ChEBI	Metlin	kegg_map
FDATN00982	Prilocaine hydrochloride	-	-	530.297	256.135	[2M+NH4]+	C13H21ClN2O	56323000	53600000	53643000	51737000	56405000	40983000	60703000	57109000	938110	783820	981750	1069700	3948900	1722300	3713200	1790100	16592000	17395000	15468000	17267000	-	-	92163	1786-81-8	-	-	--
FDATN01012	Sodium cholate	-	-	431.276	430.27	[M+H]+	C24H39NaO5	9	9	9	9	9	9	9	9	54526	38124	45024	50115	28316	34070	34816	17858	59479	79119	60995	80317	-	-	23668194	361-09-1	-	-	--
FDATN01410	Sodium Demethylcantharidate	-	-	229.121	230.13	[M-H]-	C8H8Na2O5	179580	291100	239030	282580	153040	190900	157790	195390	4424800	2732900	1101100	3025300	257990	432740	342290	283560	1144500	1011300	876270	831160	-	-	8519	13114-29-9	-	-	--
FDATN01519	D-Phenylalanine	-	-	164.073	165.08	[M-H]-	C9H11NO2	19653000	20828000	20462000	22818000	19412000	19286000	21264000	22836000	8718200	8011100	7859600	8198600	13875000	18752000	13559000	16208000	11836000	10584000	12765000	12457000	C02265	-	71567	673-06-3	-	-	ko00360,ko01100,ko04742
FDATP01029	Lidocaine hydrochloride	-	-	558.326	270.149	[2M+NH4]+	C14H23ClN2O	8885600	12166000	7825600	11682000	20812000	11431000	22154000	20148000	473580	436040	316950	510820	811840	858430	1843100	818610	4193700	4847700	5344100	5445800	-	-	6314	73-78-9	-	-	--
FDATP01700	3,4-Diaminopyridine	-	-	110.07	109.064	[M+H]+	C5H7N3	2750700	1554800	1137800	2634300	1235200	2939900	2142900	1223300	2648500	2672000	1705000	2695800	1542100	1315300	2579200	3186700	1526500	2461800	2369300	3138100	-	-	5918	54-96-6	-	-	--
FDATP01936	VitaMin U	-	-	266.658	199.7	[M-2H+3Na]+	C6H14ClNO2S	247060	261620	333640	283240	294560	244680	233280	266110	489480	438620	766550	578890	720370	981640	686440	656630	378990	278330	297980	333090	-	-	14220	3493-12-7	-	-	--
Lmhp001732	L-Prolyl-L-Phenylalanine	-	-	329.078	263.139	[M-2H+3Na]+	C14H18N2O3	5512500	4650000	4438600	6396400	5656700	4717300	6732700	7236600	86137	66859	90725	74544	2627600	3557700	3323200	2126900	1890100	2003000	2029500	2314300	-	-	6351946	13589-02-1	-	-	--
MADN0597	Aspartyl valine	-	-	253.083	232.106	[M+Na-2H]-	C9H16N2O5	207850	144780	214560	214890	163630	204600	133840	170820	41922	47876	25988	67971	63595	36056	56196	64335	61207	48063	70054	78901	-	-	-	13433-04-0	-	-	--
MADP0544	(+/-)-High Proline	-	-	281.147	129.078	[2M+Na]+	C6H11NO2	641920	667040	440400	529020	614410	430240	712350	699300	76014	45014	53603	53906	375470	558970	545440	414300	259380	208760	248020	293690	-	HMDB29444	-	56879-46-0	-	-	--
MADP0557	Proline Hydroxyproline	-	-	229.118	228.11	[M+H]+	C10H16N2O4	17596000	18093000	18021000	19639000	18519000	18501000	21048000	19533000	326970	372880	554890	596540	9654500	9185400	12519000	11101000	7858900	6785600	7918200	7744100	0	HMDB06695	-	18684-24-7	74767	-	--
MEDL00326	DL-Arginine	-	-	175.118	174.112	[M+H]+	C6H14N4O2	101930000	127860000	119540000	111940000	137590000	103290000	107740000	125440000	2206300	2069000	3157100	2645500	2281900	3075000	2098800	2515700	29446000	18927000	23313000	27302000	C02385	-	232	-	-	-	--
MEDL00369	Glu-Phe	-	-	293.113	294.122	[M-H]-	C14H18N2O5	92555	103580	79476	103220	60852	42874	61983	64662	13190000	5085100	7165900	5927700	1409800	3868300	1230900	1605100	3552200	3364900	3892900	4103000	-	HMDB0029156	18653118	-	-	-	--
MEDL00375	Glu-Trp	-	-	316.129	333.132	[M+H-H2O]+	C16H19N3O5	1751500	1982300	1900400	2330700	2214300	1492000	2148200	2243200	71991	57531	100440	85440	1264700	1953900	1751100	1204800	846460	1109100	1226600	2376600	-	HMDB0028830	100094	-	73512	-	--
MEDL00392	1-Oleoyl-sn-glycero-3-phosphocholine	-	-	522.359	521.348	[M+H]+	C26H52NO7P	9685200	6024200	6982100	11121000	26402000	17017000	28614000	24964000	621040	346860	415900	357440	83234	166770	227490	99144	5408900	4993000	4806600	5198000	-	HMDB0002815	16081932	19420-56-5	28610	184	--
MEDL00401	Confertifoline	-	-	233.155	234.162	[M-H]-	C15H22O2	28187	29508	32904	27569	30890	35668	37508	35121	35125	28783	29517	29923	34237	30414	34008	29271	34778	37215	41009	38967	C09376	-	435751	1811-23-0	-	-	--
MEDL01764	Maritimetin	-	-	285.035	286.048	[M-H]-	C15H10O6	333270	339740	351410	353410	357360	363820	363780	372640	394740	375640	382700	405400	344030	351900	360520	337310	372760	338510	381790	397290	C08720	HMDB0029711	5281292	576-02-3	-	-	--
MEDL01829	Isothankunic acid	-	-	469.33	504.346	[M+H-2H2O]+	C30H48O6	19572	15825	14059	15845	77660	52038	74145	62323	17961	19034	18052	23033	13475	16544	11490	10133	82384	85123	75937	84184	-	HMDB0040772	12302703	22882-19-5	-	-	--
MEDL01837	Nordihydrocapsiate	-	-	293.175	294.183	[M-H]-	C17H26O4	1518900	1328900	1637200	1163700	949350	1039000	1248100	853280	1235000	787240	1068000	1153600	745630	903800	1004100	1012100	798890	754620	805200	856770	-	HMDB0034779	9817607	220012-53-3	-	-	--
MEDL01867	[6]-Shogaol	-	-	277.183	276.173	[M+H]+	C17H24O3	178380	75051	39191	261180	23439	49545	370400	122480	22720	21810	21906	22114	20915	26357	21946	14320	508780	660180	552340	493330	C10494	HMDB0137236	5281794	555-66-8	-	-	--
MEDL01999	9,10,18-Trihydroxystearic acid	-	-	353.231	332.256	[M-2H+Na]-	C18H36O5	41540	35082	51837	47870	122990	79554	99764	122450	24034	19974	21277	19293	22822	32137	17328	27869	51859	60138	58459	50904	C19621	HMDB0034295	5282938	496-86-6	-	-	--
MEDL02258	Nordihydrocapsaicin	-	-	294.205	293.199	[M+H]+	C17H27NO3	1984100	2050700	2023700	2150800	2084900	2052000	1999300	2031800	2014700	2113500	2213100	2234800	2043900	2320400	2380700	2113800	2149200	2180200	2072000	2316500	C20216	HMDB0036328	168836	28789-35-7	-	-	--
MEDL02262	Trehalose 6-phosphate	-	-	421.072	422.083	[M-H]-	C12H23O14P	219350	326530	188630	235980	52782	54759	52480	62707	511820	332270	370180	350150	234740	154760	164850	101670	244900	190150	245180	184780	C00689	HMDB0001124	122336	4484-88-2	18283	6019	ko00500,ko01100,ko04723
MEDL02569	1,7-Dihydroxyxanthone	-	-	227.03	228.042	[M-H]-	C13H8O4	39785	26888	41532	45339	150070	98954	212010	165410	20317	19922	14702	15970	105810	126700	111960	87352	52690	55251	62641	69364	C10061	HMDB0030724	5281631	529-61-3	4946	-	--
MEDL02641	Moracin M	-	-	241.048	242.058	[M-H]-	C14H10O4	25876000	24595000	23622000	22636000	19076000	21393000	21049000	19614000	4007900	5500300	4520000	4555000	20769000	20742000	22138000	22822000	6424900	6538800	7256500	8156200	-	HMDB0033307	185848	56317-21-6	-	-	--
MEDL02667	Perlolyrine	-	-	265.097	264.09	[M+H]+	C16H12N2O2	1028000	752200	1134800	1251000	3153900	2208500	2985400	3249000	180410	156240	185820	131680	150400	178440	195950	134800	793000	884250	943200	1065600	C09231	HMDB0030327	160179	29700-20-7	610215	-	--
MEDL02681	6-Deoxyfagomine	-	-	132.101	131.095	[M+H]+	C6H13NO2	13738000	13419000	14025000	14809000	5814700	11129000	10490000	12137000	2250000	1386500	1761900	1979500	21842000	22921000	21289000	19047000	7879500	7134300	9990200	8973300	-	HMDB0036382	57449463	197449-09-5	-	-	--
MEDL02717	12-Oxo-10E-Dodecenoic Acid	-	-	228.16	212.141	[M+NH4-2H]-	C12H20O3	65363	59291	54886	70588	59821	43022	62322	69511	3673.6	5348.4	4223.4	5405.6	68261	86992	72828	56450	31890	24370	34109	40328	C16309	HMDB0037326	5312889	65410-38-0	19144	-	ko00592
MEDN0005	L-Threonine	Amino acid and Its metabolomics	Amino acids	118.05	119.058	[M-H]-	C4H9NO3	1036300	845310	1181500	1001900	540020	968240	467880	635470	42977	63834	45541	49885	136630	109260	177670	156190	248570	175000	185410	188930	C00188	HMDB0000167	6288	72-19-5	16857	32	ko00260,ko00261,ko00290,ko00860,ko00970,ko01100,ko01230,ko02010,ko04974,ko04978
MEDN0009	L-Aspartic Acid	Amino acid and Its metabolomics	Amino acids	132.03	133.038	[M-H]-	C4H7NO4	4894900	5039500	5619800	4214200	2778600	3844500	2489300	2783200	4252300	4126800	3554200	4025800	71241000	69637000	69168000	74055000	18356000	17250000	17998000	19259000	C00049	HMDB0000191	5960	56-84-8	17053	5206	ko00220,ko00250,ko00260,ko00261,ko00270,ko00300,ko00340,ko00410,ko00760,ko00770,ko00970,ko01100,ko01200,ko01210,ko01230,ko02010,ko04080,ko04974,ko05230
MEDN0027	3-N-Methyl-L-Histidine	Amino acid and Its metabolomics	Amino acid derivatives	169	187.096	[M-NH4]-	C7H13N3O3	54157	65014	42867	45059	9	9	9	9	214440	217320	153850	199310	1646300	2003800	2147200	2289300	833160	805270	886720	904420	C01152	HMDB0000479	64969	368-16-1	27596	5466	ko00340,ko01100
MEDN0028	4-Hydroxy-glutamic acid	Amino acid and Its metabolomics	Amino acid derivatives	162.04	163.032	[M-H]-	C5H9NO5	33181	30265	38470	41055	9	9	72193	58372	70633	59513	29982	87459	216640	352260	273230	332970	81643	60910	72232	75077	C03079	-	-	3913-68-6	-	-	--
MEDN0032	Allantoin	Organic acid And Its derivatives	Organic acid And Its derivatives	157.036	158.044	[M-H]-	C4H6N4O3	563630	640640	503900	477990	388860	337280	443600	490880	3581600	3780900	4773100	3503500	912290	943190	1680500	1409600	2743500	2762800	2968700	2758900	C01551	HMDB0000462	204	97-59-6	15676	89	--
MEDN0036	Ala-Ala	Amino acid and Its metabolomics	Small Peptide	159.077	160.085	[M-H]-	C6H12N2O3	223040	312620	225330	290090	83531	87981	78488	88708	360860	492320	241110	148990	410810	435420	423140	508550	363020	271590	258860	267880	C00993	HMDB0003459	5460362	923-16-0	16576	6937	ko01100
MEDN0053	N-Acetylaspartate	Amino acid and Its metabolomics	Amino acid derivatives	174.04	175.048	[M-H]-	C6H9NO5	67698	101640	68639	68592	78092	58973	81412	65279	46546	27237	33441	56869	2349600	2959700	2609700	2510700	346310	386910	411650	401860	C01042	HMDB0000812	65065	997-55-7	21547	5776	ko00250,ko01100
MEDN0056	N-Acetyl-L-Leucine	Amino acid and Its metabolomics	Amino acid derivatives	172.097	173.105	[M-H]-	C8H15NO3	1624100	1660300	1527100	1709200	1392000	1188900	1400300	1530700	1044500	1609200	1183100	735800	7772100	8846000	6205900	7787200	2257300	1913300	2137000	2010400	C02710	HMDB0011756	70912	1188-21-2	17786	-	--
MEDN0061	N-Phenylacetylglycine	Amino acid and Its metabolomics	Amino acid derivatives	192.066	193.074	[M-H]-	C10H11NO3	119650	101940	109050	113510	113150	91887	114630	118720	23586	15296	15769	8137	105470	138530	132590	93195	55478	45980	53509	54760	C05598	HMDB0000821	68144	500-98-1	27480	4237	ko00360
MEDN0062	N-Propionylglycine	Amino acid and Its metabolomics	Amino acids	130.05	131.058	[M-H]-	C5H9NO3	3321000	2993000	3020200	3367100	2998600	3231600	3067700	3274400	577850	494700	551760	535140	3176000	3385700	2952300	3081700	1699000	1521300	1689200	1895600	-	HMDB0000783	98681	21709-90-0	89836	5749	--
MEDN0065	O-Phospho-L-Serine	Amino acid and Its metabolomics	Amino acid derivatives	184.001	185.009	[M-H]-	C3H8NO6P	9	9	19760	34758	9	9	9	16202	448340	242730	119140	319510	9	9	9	9	65104	59261	69727	82572	C01005	HMDB0000272	68841	407-41-0	15811	5270	ko00260,ko00270,ko00970,ko01100,ko01200,ko01230
MEDN0086	Terephthalic Acid	Benzene and substituted derivatives	Phenolic acids	165.019	166.027	[M-H]-	C8H6O4	1344500	1286300	1388500	1287200	1429400	1497300	1229100	1459900	1410900	1516000	1166500	1075300	761880	652410	855920	1069100	1268200	1209400	1367700	1776600	C06337	HMDB0002428	7489	100-21-0	15702	6676	ko01100
MEDN0098	2-Picolinic Acid	Heterocyclic compounds	Pteridines and derivatives	122.024	123.032	[M-H]-	C6H5NO2	1934300	1730900	1741300	2167900	1445500	1544700	1458000	1596700	2406000	2358000	3771500	2494600	12390000	18208000	11123000	11875000	5404300	5285000	5427600	5633000	C10164	HMDB0002243	1018	98-98-6	28747	-	ko00380,ko01100
MEDN0120	Dulcitol	Carboxylic acids and derivatives	Sugar alcohols	181.071	182.079	[M-H]-	C6H14O6	14713	19149	32262	14065	31329	29611	41058	28665	729470	995480	1200800	1040400	36296	16234	30551	19791	574090	489420	577840	624750	C01697	HMDB0000107	11850	608-66-2	16813	5148	ko00052,ko01100
MEDN0128	4-Hydroxy-3-methoxybenzaldehyde	Benzene and substituted derivatives	Phenolics	151.04	152.047	[M-H]-	C8H8O3	66107	44869	55211	56311	61199	50833	64709	74041	32987	36201	35814	21023	21408	18637	25557	26192	28319	20110	22487	32287	C00755	HMDB0012308	1183	121-33-5	18346	-	ko01100
MEDN0134	Thiamine Pyrophosphate（TPP）	CoEnzyme and vitamins	CoEnzyme and vitamins	424.037	425.045	[M-H]-	C12H19N4O7P2S	9	5191	5238	9	9	9	9	9	47336	77767	34573	36839	9	9	9	9	9253.8	17584	16142	16404	C00068	HMDB0001372	1132	154-87-0	9532	2832	ko00010,ko00020,ko00280,ko00620,ko00640,ko00730,ko01100,ko04977
MEDN0140	Xanthine	Nucleotide And Its metabolomics	Nucleotide and Its metabolomics	151.026	152.033	[M-H]-	C5H4N4O2	3612400	1689200	2435000	4378800	5429400	6942400	5998300	6507100	7780900	3599100	8267600	4328900	24398000	31762000	17147000	30110000	7740700	6764400	6794200	8156200	C00385	HMDB0000292	1188	69-89-6	17712	82	ko00230,ko00232,ko01100
MEDN0146	5-Hydroxymethyluracil	Nucleotide And Its metabolomics	Nucleotide and Its metabolomics	141.03	142.038	[M-H]-	C5H6N2O3	137160	169260	153690	131210	154530	132460	193470	152080	45984	78622	66110	46031	349120	434600	443630	491950	168680	146850	155410	160100	C03088	HMDB0000469	78168	4433-40-3	16964	5456	--
MEDN0149	7-Methylxanthine	Nucleotide And Its metabolomics	Nucleotide and Its metabolomics	165.041	166.049	[M-H]-	C6H6N4O2	7481.3	2378.6	5772.9	6376.3	2544.2	9	9	9	54745	30651	49660	25731	26540	39828	25348	43063	27069	23045	28359	28823	C16353	HMDB0001991	68374	552-62-5	48991	-	ko00232,ko01100
MEDN0153	Adenosine 5'-Monophosphate	Nucleotide And Its metabolomics	Nucleotide and Its metabolomics	346.055	347.063	[M-H]-	C10H14N5O7P	303960	561620	174360	558160	56502	59897	38635	36729	1000500	674050	730700	655280	489830	447890	515650	401960	391090	375860	411030	394400	C00020	HMDB0000045	6083	61-19-8	16027	5111	ko00230,ko01100,ko01523,ko04022,ko04024,ko04068,ko04150,ko04151,ko04152,ko04211,ko04740,ko04742,ko04923,ko04924,ko04925,ko04927,ko04928,ko04934,ko05012,ko05032
MEDN0158	Deoxyguanosine	Nucleotide And Its metabolomics	Nucleotide and Its metabolomics	266.089	267.097	[M-H]-	C10H13N5O4	53101	51355	33344	59202	16313	27623	12347	20181	57268	43501	39766	41400	45728	74904	94198	64945	39643	37282	40037	49906	C00330	HMDB0000085	187790	961-07-9	17172	3395	ko00230,ko01100,ko02010
MEDN0159	Flavin Adenine Dinucleotide(FAD)	Nucleotide And Its metabolomics	Nucleotide and Its metabolomics	784.149	785.157	[M-H]-	C27H33N9O15P2	101290	115040	58886	111780	21412	17503	17227	26730	715630	606390	576770	675970	1062800	1489000	1414000	1039600	510200	549660	684570	688390	C00016	HMDB0001248	643975	146-14-5	16238	6106	ko00740,ko01100,ko04977
MEDN0165	Inosine 5'-monophosphate	Nucleotide And Its metabolomics	Nucleotide and Its metabolomics	347.041	348.047	[M-H]-	C10H13N4O8P	19890	36851	17673	38636	9	9	9	9	74827	53240	59228	59513	41817	34306	43706	27254	24978	23100	38789	35232	C00130	HMDB0000175	135398640	3249-92-1	17202	5196	ko00230,ko01100,ko01523,ko04742
MEDN0168	Thymidine	Nucleotide And Its metabolomics	Nucleotide and Its metabolomics	241.082	242.09	[M-H]-	C10H14N2O5	5887.9	7828.2	3423.8	3886.5	9	9	9	9	9009.6	9191.1	8955.1	6721.9	6637.3	12940	7803.7	6749.3	11384	11028	11331	13734	C00214	HMDB0000273	5789	50-89-5	17748	3375	ko00240,ko01100
MEDN0171	Uridine	Nucleotide And Its metabolomics	Nucleotide and Its metabolomics	243.065	244.07	[M-H]-	C9H12N2O6	118200	113050	89582	117790	50989	45947	55566	68169	214170	260600	239110	205310	459490	541160	418000	443820	187570	195930	191250	209380	C00299	HMDB0000296	6029	58-96-8	16704	90	ko00240,ko01100,ko02010
MEDN0195	Pyridoxal 5'-Phosphate	Heterocyclic compounds	Pteridines and derivatives	246.017	247.025	[M-H]-	C8H10NO6P	9	9	9	9	9	9	9	9	2457600	1967000	1937200	2602000	1264700	2490600	2140600	1945600	734250	601530	1127600	962680	C00018	HMDB0001491	1051	54-47-7	18405	6275	ko00730,ko00750,ko01100,ko04977
MEDN0198	Citric Acid	Organic acid And Its derivatives	Organic acid And Its derivatives	173.009	192.027	[M-H2O-H]-	C6H8O7	2375200	2487800	2322000	2495400	2409800	2542900	2590600	2701500	87750	78960	55999	65407	70625	122180	66811	83271	858570	832030	757520	865310	C00158	HMDB0000094	311	77-92-9	30769	124	ko00020,ko00250,ko00630,ko01100,ko01200,ko01210,ko01230,ko04742,ko04922,ko05230
MEDN0201	Succinic Acid	Organic acid And Its derivatives	Organic acid And Its derivatives	117.019	118.027	[M-H]-	C4H6O4	1122500	1162500	1118100	1103200	911780	852690	920660	1004400	770990	396830	385640	756310	3034600	2791200	3363200	2544000	1096100	1103500	1151500	1223000	C00042	HMDB0000254	1110	110-15-6	-	-	ko00020,ko00190,ko00250,ko00310,ko00350,ko00360,ko00620,ko00630,ko00640,ko00650,ko00760,ko00920,ko01100,ko01200,ko04024,ko04727,ko04922,ko05230
MEDN0206	Citramalic Acid	Organic acid And Its derivatives	Organic acid And Its derivatives	147.029	148.1	[M-H]-	C5H8O5	68100	63865	62323	78599	60428	51173	45389	64997	78520	43098	45147	59776	250760	239700	204950	148490	181690	186690	226790	229380	C00815	HMDB0000426	1081	597-44-4	15584	5415	--
MEDN0209	Tryptamine	Tryptamines,Cholines,Pigments	Tryptamines	159.092	160.1	[M-H]-	C10H12N2	99829	85400	96221	81161	389340	289220	391450	415720	40578	49718	64093	62037	171890	149040	171480	142670	146940	141550	156190	162580	C00398	HMDB0000303	1150	61-54-1	16765	-	ko00380,ko01100,ko04080
MEDN0210	1,5-Anhydro-D-Glucitol	Carboxylic acids and derivatives	Sugar alcohols	163.061	164.069	[M-H]-	C6H12O5	9	9	9	9	9	9	9	9	22281	23042	27765	29309	18894	17843	18378	28266	16796	21343	19877	32223	C07326	HMDB0002712	64960	154-58-5	16070	3775	--
MEDN0211	D-Arabitol	Carboxylic acids and derivatives	Sugar alcohols	151.061	152.069	[M-H]-	C5H12O5	29699	13926	17933	13382	7561.1	12902	10688	7784.9	101280	146900	86571	82725	220000	276990	286220	231690	158760	126090	143320	155550	C01904	HMDB0000568	827	488-82-4	18333	5551	ko00040,ko01100
MEDN0220	D-Glucose	Carboxylic acids and derivatives	Sugars	179.057	180.063	[M-H]-	C6H12O6	290380	300670	296260	256600	223980	243770	247680	268120	846390	863220	691170	760610	532640	664440	620070	521500	465760	431080	465400	505990	C00031	HMDB0000122	5793	50-99-7	4167	133	ko00010,ko00030,ko00052,ko00500,ko00520,ko00524,ko01100,ko02010,ko04066,ko04068,ko04152,ko04742,ko04910,ko04911,ko04917,ko04922,ko04930,ko04931,ko04932,ko04933,ko04973,ko04976,ko04978,ko05230
MEDN0222	D-Melezitose	Carboxylic acids and derivatives	Sugars	503.161	504.169	[M-H]-	C18H32O16	9	9	9	9	9	9	9	4134.4	155300	153110	101300	110410	9	9	9	9	46263	46297	35717	27468	C08243	HMDB0011730	92817	597-12-6	6731	-	--
MEDN0224	D-Trehalose	Carboxylic acids and derivatives	Sugars	341.108	342.116	[M-H]-	C12H22O11	5445.4	4758.9	10206	8699	286830	212450	260740	276190	266990	189960	123960	139020	21532	18244	16307	15764	70813	66971	81852	70742	C01083	HMDB0000975	7427	99-20-7	16551	5913	ko00500,ko01100,ko02010
MEDN0226	D-Erythronolactone	Aldehyde,Ketones,Esters	Esters	117.019	118.027	[M-H]-	C4H6O4	31594	33662	36701	32276	45627	42523	35449	29175	30001	18618	22879	15879	35857	26277	33043	44843	35567	21129	37995	20598	-	HMDB0000349	5325915	15667-21-7	87625	5338	--
MEDN0227	D-Glucose 6-Phosphate	Carboxylic acids and derivatives	Phosphate sugars	259.022	260.03	[M-H]-	C6H13O9P	120780	120750	132370	95965	120070	201060	154280	158490	42854000	27432000	26454000	44390000	2036100	2361900	1200900	1719000	10821000	10191000	10861000	11415000	C00092	HMDB0001401	439958	56-73-5	4170	145	ko00500,ko00524,ko00562,ko01100,ko04911,ko04917,ko04918,ko04931,ko04973,ko05230
MEDN0235	N-Acetyl-D-Glucosamine	Carboxylic acids and derivatives	Sugar derivatives	220.082	221.09	[M-H]-	C8H15NO6	182570	164800	185880	232810	275030	238080	266510	229690	270580	266430	241080	238100	268930	297070	225810	260230	255180	198450	260060	292510	C00140	HMDB0000215	439174	7512-17-6	506227	3356	ko00520,ko01100,ko02010
MEDN0237	D-Glucoronic Acid	Carboxylic acids and derivatives	Sugar acids	193.036	194.043	[M-H]-	C6H10O7	9	9	9	9	9	9	9	9	67327	58813	70872	66774	31936	9	27980	28412	61132	55516	56491	51775	-	-	65041	6556-12-3	-	-	--
MEDN0239	D-Gluconic Acid	Carboxylic acids and derivatives	Sugar acids	195.051	196.058	[M-H]-	C6H12O7	5533	5837.4	6370.7	4361.9	3916.6	5208.2	5203.5	6653.7	856830	1026000	712530	745080	14011	15269	28997	12322	305810	290000	316620	305580	C00257	HMDB0000625	10690	526-95-4	33198	345	ko00030,ko01100,ko01200
MEDN0240	L-Gulonolactone	Carboxylic acids and derivatives	Sugar acids	177.04	178.048	[M-H]-	C6H10O6	14285	14143	11333	5526.5	7766.9	16721	12517	2719.7	32167	25727	28983	20564	173920	147700	71923	220350	91153	67892	65560	67789	C01040	HMDB0003466	439373	1128-23-0	17587	-	ko00053,ko01100
MEDN0244	Orotic Acid	CoEnzyme and vitamins	CoEnzyme and vitamins	155.009	156.017	[M-H]-	C5H4N2O4	66875	62959	55676	83245	41826	47114	56720	40517	2094500	1680600	1625600	2162600	11680000	8836200	7682400	6803800	2457900	2497400	2663100	2652900	C00295	HMDB0000226	967	65-86-1	16742	318	ko00240,ko01100
MEDN0245	Pantothenate	CoEnzyme and vitamins	CoEnzyme and vitamins	218.103	219.1	[M-H]-	C9H17NO5	1754600	1895200	1668000	1992800	1500500	1362700	1524200	1832500	3918200	3544900	3251700	3487900	17458000	21192000	21577000	18036000	5359800	4541200	5328000	6174900	C00864	HMDB0000210	988	79-83-4	46905	-	ko00410,ko00770,ko01100,ko04977
MEDN0266	Indole-3-Carboxaldehyde	Heterocyclic compounds	Indole and Its derivatives	144.045	145.053	[M-H]-	C9H7NO	221220	182770	200490	219590	239080	217510	299300	291140	8018.8	9764.3	7632.1	8131.3	107430	120940	113340	83450	91763	91140	98892	102600	C08493	HMDB0029737	10256	487-89-8	343043	-	--
MEDN0280	2-Aminoethanesulfonic Acid	Organic acid And Its derivatives	Sulfonic acids	124.007	125.015	[M-H]-	C2H7NO3S	92024	48442	79739	90396	47072	45246	115050	115930	89911	107520	88769	83991	36851	28423	33347	25292	97111	106420	80985	71860	C00245	HMDB0000251	1123	107-35-7	15891	31	ko00120,ko00430,ko00920,ko01100,ko02010,ko04080
MEDN0283	2-Hydroxybutanoic Acid	Organic acid And Its derivatives	Organic acid And Its derivatives	103.04	104.047	[M-H]-	C4H8O3	117420	117290	125560	139210	137490	115100	143910	132940	589660	949530	1305400	1182700	1839700	1473100	1013600	1317100	858760	928780	855080	953230	C05984	HMDB0000008	11266	600-15-7	1148	3783	ko00640
MEDN0284	2-Hydroxyisocaproic Acid	Organic acid And Its derivatives	Organic acid And Its derivatives	131.071	132.079	[M-H]-	C6H12O3	67027	71090	57779	79103	33596	26001	30074	35194	43677	38937	17015	55580	428470	541350	516680	395770	109110	92741	110720	96263	-	HMDB0000665	92779	498-36-2	59783	5635	--
MEDN0285	2-Methylsuccinic Acid	Organic acid And Its derivatives	Organic acid And Its derivatives	131.036	132.042	[M-H]-	C5H8O4	9779.3	11594	12963	10777	12000	7951.9	9240.8	16763	384180	415300	404190	435070	5071700	6765600	6624700	6435500	1856000	1668800	1926600	1946600	C08645	HMDB0001844	10349	498-21-5	91315	6344	--
MEDN0293	3-Hydroxypropanoic Acid	Organic acid And Its derivatives	Organic acid And Its derivatives	89.0239	90.032	[M-H]-	C3H6O3	19533	20520	24371	25312	36132	43161	42849	38170	235780	86532	121720	378240	12722	9	16550	4551.3	95011	87566	79466	83793	C01013	HMDB0000700	68152	503-66-2	33404	5668	ko00240,ko00410,ko00640,ko01100,ko01200
MEDN0299	Adipic Acid	Organic acid And Its derivatives	Organic acid And Its derivatives	145.05	146.058	[M-H]-	C6H10O4	41420	29312	38214	21701	25677	20522	40817	63869	54177	61418	48432	52490	39211	37912	37725	33279	43863	43212	47988	47678	C06104	HMDB0000448	196	124-04-9	30832	115	ko01100
MEDN0300	Azelaic Acid	Organic acid And Its derivatives	Organic acid And Its derivatives	187.097	188.105	[M-H]-	C9H16O4	757780	735460	796550	755890	729850	730770	848980	765930	1106300	1131300	1018100	1072900	840600	878710	805390	842630	1086900	1029800	1054800	1010600	C08261	HMDB0000784	2266	123-99-9	48131	5750	--
MEDN0305	Creatine	Organic acid And Its derivatives	Organic acid And Its derivatives	130.062	131.07	[M-H]-	C4H9N3O2	9	9	9	9	9	9	9	9	45834	31586	36183	43362	723860	781240	680230	561190	124490	118160	114260	133130	C00300	HMDB0000064	586	57-00-1	16919	7	ko00260,ko00330,ko01100
MEDN0314	Glutaric Acid	Organic acid And Its derivatives	Organic acid And Its derivatives	131.036	132.042	[M-H]-	C5H8O4	9779.3	11594	12963	10777	12000	7951.9	9240.8	16763	384180	415300	404190	435070	5071700	6765600	6624700	6435500	1856000	1668800	1926600	1946600	C00489	HMDB0000661	743	110-94-1	17859	3254	ko00071,ko00310,ko01100
MEDN0323	Kynurenic Acid	Amino acid and Its metabolomics	Amino acid derivatives	188.035	189.043	[M-H]-	C10H7NO3	187190	198860	171660	213450	168980	127500	179030	186300	91981	91907	84009	98445	14157000	17624000	13371000	12108000	2274900	2186000	2092100	2515000	C01717	HMDB0000715	3845	492-27-3	18344	5683	ko00380,ko01100
MEDN0325	L-Lactic Acid	Organic acid And Its derivatives	Organic acid And Its derivatives	89.0239	90.0317	[M-H]-	C3H6O3	19533	20520	24371	25312	36132	43161	42849	38170	235780	86532	121720	378240	12722	9	16550	4551.3	95011	87566	79466	83793	C00186	HMDB0000190	107689	79-33-4	422	5205	ko00010,ko00051,ko00620,ko00640,ko01100,ko04024,ko04066,ko04922,ko05230
MEDN0333	Malonicacid	Organic acid And Its derivatives	Organic acid And Its derivatives	103.04	104.011	[M-H]-	C3H4O4	117420	117290	125560	139210	137490	115100	143910	132940	589660	949530	1305400	1182700	1839700	1473100	1013600	1317100	858760	928780	855080	953230	C00383	HMDB0000691	867	141-82-2	30794	3237	ko00061,ko00240,ko00410,ko01100,ko01212
MEDN0338	Phenyllactate(Pla)	Organic acid And Its derivatives	Organic acid And Its derivatives	165.055	166.063	[M-H]-	C9H10O3	526670	561510	451300	548050	168070	156890	165660	184600	2325300	2386700	2201600	2039100	6364200	8726000	5193500	5417400	2245600	2230200	2368600	2353700	C01479	HMDB0000779	3848	828-01-3	25998	5745	--
MEDN0340	Pyrrole-2-Carboxylic Acid	Organic acid And Its derivatives	Organic acid And Its derivatives	110.024	111.032	[M-H]-	C5H5NO2	12903	18250	14857	17145	17136	14652	16878	18106	31914	29516	32644	29396	20598	21011	20748	18107	24323	20955	22642	26301	C05942	HMDB0004230	12473	634-97-9	36751	3787	ko00330
MEDN0343	Shikimic Acid	Organic acid And Its derivatives	Organic acid And Its derivatives	173.045	174.053	[M-H]-	C7H10O5	58009	58695	63642	65598	65737	60859	62765	83017	9	9	9	9	33067	32855	25202	25605	18505	23390	15590	23854	C00493	HMDB0003070	8742	138-59-0	16119	338	ko00400,ko01100,ko01230
MEDN0344	Subericacid	Organic acid And Its derivatives	Organic acid And Its derivatives	173.081	174.089	[M-H]-	C8H14O4	38436	34749	34918	39762	41769	45501	36184	38648	67038	68827	65699	57933	75996	57288	60267	63626	65028	49841	59473	63179	C08278	HMDB0000893	10457	505-48-6	9300	4243	--
MEDN0352	O-Phosphorylethanolamine	GP	PE	140.011	141.019	[M-H]-	C2H8NO4P	400180	464060	377970	443620	389910	494420	474310	481380	87364	85662	52016	73775	49756	38822	39972	71317	176490	148470	140860	170840	C00346	HMDB0000224	1015	1071-23-4	17553	5233	ko00564,ko00600,ko01100,ko04071
MEDN0356	LPS(22:6/0:0)	GP	LPS	568.268	569.275	[M-H]-	C28H44NO9P	97689	100670	107970	88406	97067	137160	101970	122650	109880	114130	116990	116780	119250	133440	131850	117270	116620	112470	126200	132470	-	-	-	-	-	-	--
MEDN0362	LPE(18:1/0:0)	GP	LPE	478.293	479.301	[M-H]-	C23H46NO7P	282540	252950	236750	338540	1312500	1385000	1504000	1795000	19294	12374	9284.6	13691	228280	285840	232030	192660	340450	345590	272630	436880	-	HMDB0011506	53480949	-	74971	-	--
MEDN0364	LPE(18:0/0:0)	GP	LPE	480.309	481.317	[M-H]-	C23H48NO7P	502550	459090	410080	442350	1345800	1382900	1614000	1786100	39698	24558	25678	32507	37164	57891	48030	45319	618760	608910	671410	708070	-	HMDB0011130	9547068	-	75036	-	--
MEDN0366	LPE(16:0/0:0)	GP	LPE	452.278	453.286	[M-H]-	C21H44NO7P	410340	367820	329740	421980	599060	656120	776790	848440	35320	22809	23643	29999	94973	127410	108660	88722	303020	304400	325070	342870	-	-	-	-	-	-	--
MEDN0368	LPE(14:0/0:0)	GP	LPE	424.246	425.254	[M-H]-	C19H40NO7P	588280	519430	474800	664180	1105300	1003200	1272100	1303600	18871	8717.2	12584	14837	41795	64239	51390	44122	308550	280510	323730	352290	-	-	-	-	-	-	--
MEDN0376	9,10-DiHOME	FA	Oxidized lipids	313.238	314.246	[M-H]-	C18H34O4	20317	12681	14960	15552	16253	16509	22632	22058	11326	9682.2	7448.9	7363.3	5954.4	8272.6	8356.6	4594.9	18222	17280	22229	23375	C14828	HMDB0004704	9966640	-	-	-	ko00591
MEDN0380	FFA(16:1)	FA	FFA	253.217	254.2	[M-H]-	C16H30O2	5651600	2460000	2615300	6071100	10158000	9114800	6937000	9751800	141590	67870	24926	44187	485910	1150300	571680	401770	7342100	4441700	8621300	8265300	C08362	HMDB0003229	445638	373-49-9	28716	188	ko00061
MEDN0381	FFA(16:0)	FA	FFA	255.232	256.24	[M-H]-	C16H32O2	12597000	20860000	19489000	9524600	16006000	20216000	22533000	24199000	2530100	3780800	7584600	5598200	1511600	9546700	6146600	4985400	4628700	17067000	14106000	13807000	C00249	HMDB0000220	985	57-10-3	15756	187	ko00061,ko00062,ko00071,ko01040,ko01100,ko01212
MEDN0383	FFA(18:2)	FA	FFA	279.232	280.24	[M-H]-	C18H32O2	372190	178350	157050	412770	877650	743760	590440	775680	4233.9	3854	6653.6	7084	10017	6131.8	7727.2	4783.3	257600	228820	199250	170670	C01595	HMDB0000673	5280450	60-33-3	17351	191	ko00591,ko01040,ko01100
MEDN0385	FFA(12:0)	FA	FFA	199.17	200.17	[M-H]-	C12H24O2	1279900	953250	1201900	1297800	1442700	1412900	1536800	1772800	74942	71063	66105	84188	71549	88317	65425	68120	480430	461140	508270	524130	C02679	HMDB0000638	3893	143-07-7	30805	5611	ko00061,ko01100
MEDN0391	DHA	FA	Oxidized lipids	327.232	328.24	[M-H]-	C22H32O2	541140	448190	453140	563760	340290	353530	375290	499380	24726	19514	22058	17805	21470	31402	22648	10170	169090	169680	215650	210750	C06429	HMDB0002183	445580	6217-54-5	28125	3457	ko01040
MEDN0403	Urocanic Acid	Organic acid And Its derivatives	Organic acid And Its derivatives	137.035	138.043	[M-H]-	C6H6N2O2	13927	12680	12501	14780	13526	9573.3	25068	9900	127610	119190	119070	131890	102870	132310	95103	114220	68994	59258	54750	72798	C00785	HMDB0000301	736715	104-98-3	30817	298	ko00340,ko01100
MEDN0410	4-Hydroxybenzaldehyde	Benzene and substituted derivatives	Benzene and substituted derivatives	121.029	122.037	[M-H]-	C7H6O2	635060	629900	603290	704410	1332900	1287800	1595600	1569400	122010	115820	106690	112500	175780	304250	209750	222130	414520	418480	456330	476740	C00633	HMDB0011718	126	123-08-0	17597	-	ko01100
MEDN0415	2-(Formylamino)Benzoic Acid	Benzene and substituted derivatives	Phenolic acids	164.035	165.043	[M-H]-	C8H7NO3	396540	358130	377210	382290	386200	400340	540790	499560	225490	254730	227310	292650	1097800	1443400	1090700	1050300	530900	496180	512840	548990	C05653	HMDB0004089	101399	3342-77-6	36575	-	ko00380,ko01100
MEDN0417	(Rs)-Mevalonic Acid	Organic acid And Its derivatives	Organic acid And Its derivatives	147.066	148.074	[M-H]-	C6H12O4	78600	70091	85158	85918	86119	76483	83452	92555	9	9	9	9	63657	61944	55657	52381	34529	34912	29401	27945	C00418	HMDB0000227	449	150-97-0	25351	127	ko00900,ko01100,ko04216
MEDN0419	Uridine 5-Monophosphate	Nucleotide And Its metabolomics	Nucleotide and Its metabolomics	323.028	324.036	[M-H]-	C9H13N2O9P	158130	224110	114820	170460	26926	29184	25225	32128	536850	295210	310110	193790	254330	155790	198960	139930	142380	120100	160300	141930	C00105	HMDB0000288	6030	58-97-9	16695	-	ko00240,ko01100
MEDN0432	5-Hydroxyhexanoic Acid	Organic acid And Its derivatives	Organic acid And Its derivatives	131.071	132.079	[M-H]-	C6H12O3	3384600	3515800	2892800	3481500	1753100	1592600	1783600	1855000	10776000	9582700	8705700	7550300	41250000	60356000	39661000	39609000	10696000	10303000	11128000	11855000	-	HMDB0000525	170748	185956-02-9	131434	5510	--
MEDN0434	Β-Pseudouridine	Nucleotide And Its metabolomics	Nucleotide and Its metabolomics	243.062	244.07	[M-H]-	C9H12N2O6	838240	814740	574830	850660	276640	291250	291920	342580	1528400	1677900	1578700	1785600	2357100	2602200	2190600	2545000	1364200	1415800	1414200	1599500	C02067	HMDB0000767	15047	1445-07-4	17802	5734	ko00240,ko01100
MEDN0445	Orotidine	Nucleotide And Its metabolomics	Nucleotide and Its metabolomics	287.052	288.059	[M-H]-	C10H12N2O8	9	9	9	9	9	9	9	9	39830	40022	44146	38898	325780	321520	336390	207450	77074	56588	74388	64156	C01103	HMDB0000788	92751	314-50-1	25722	5754	ko00240,ko01100
MEDN0461	D-Sedoheptuiose 7-Phosphate	Carboxylic acids and derivatives	Phosphate sugars	287.017	425.93	[M-Ba]-	C7H13BaO10P	32178	36943	34077	34361	42934	51613	58730	34689	58164	52687	62485	53230	38462	24511	35871	33694	45050	57234	45673	44468	C00281	HMDB0001068	22833559	2646-35-7	15721	-	--
MEDN0463	D-Fructose 6-Phosphate-Disodium Salt	Carboxylic acids and derivatives	Phosphate sugars	259	304.1	[M-2Na+H]-	C6H11Na2O9P	82083	69612	52360	50754	81893	123840	85955	93197	15970000	10637000	10289000	17228000	893290	1124700	550430	708580	4308700	4153100	4378300	4296600	-	-	22812950	26177-86-6	-	-	--
MEDN0478	Aminomalonic Acid	Organic acid And Its derivatives	Organic acid And Its derivatives	118.014	119.022	[M-H]-	C3H5NO4	3931900	4048300	3898900	3991300	3019500	3015500	3303100	3557100	2642900	1494900	1366800	2828400	11610000	10242000	11870000	8847800	4087400	3919700	4128100	4208700	C00872	HMDB0001147	100714	1068-84-4	17475	-	--
MEDN0480	Dl-Glyceraldehyde3-Phosphate	Organic acid And Its derivatives	Phosphoric acids	168.99	169.998	[M-H]-	C3H7O6P	9	9	9	9	9	9	9	9	6015100	3780400	1190600	8415900	9	65773	95978	62636	796860	656520	1011700	1129400	C00661	HMDB0001112	729	591-59-3	17138	3294	--
MEDN0485	D-Fructose-1,6-Biphosphate-Trisodium Salt	Carboxylic acids and derivatives	Phosphate sugars	339	405.942	[M-3Na+2H]-	C6H11Na3O12P2	86612	94246	48977	53073	41886	63400	52916	71720	4282400	3104600	1422500	5663400	46525	21977	37579	37145	547010	427710	621190	536880	-	-	129893469	81028-91-3	-	-	--
MEDN0494	8,15-Dihete	FA	FFA	335.222	336.23	[M-H]-	C20H32O4	2933800	921640	794320	3981400	3880400	3244200	2085600	3066600	115970	45229	9051.5	32697	395910	932630	453390	260020	3967600	1727900	4313900	4112500	-	HMDB0010219	53480358	80234-65-7	88456	-	--
MEDN0496	N-Acetylmethionine	Amino acid and Its metabolomics	Amino acid derivatives	190.054	191.062	[M-H]-	C7H13NO3S	31331	30692	29807	29411	23800	20294	25533	30981	50788	98013	79095	43213	385280	355380	265840	302010	84072	77631	90073	93918	C02712	HMDB0011745	6180	65-82-7	165927	-	--
MEDN0498	Ribulose-5-Phosphate	Carboxylic acids and derivatives	Phosphate sugars	229.011	230.019	[M-H]-	C5H11O8P	1263000	1477900	1153600	1111600	299980	544370	366190	322380	25069000	15444000	8513000	11795000	1363800	1762900	1285500	1238200	3583700	3182200	3305700	4010300	C00117	HMDB0000618	439184	4300-28-1	17363	-	ko00030,ko00230,ko00440,ko00750,ko01100,ko01200,ko01230,ko04918
MEDN0499	Argininosuccinic acid	Organic acid And Its derivatives	Organic acid And Its derivatives	289.115	290.123	[M-H]-	C10H18N4O6	351290	487680	307170	241600	112420	117460	98928	120990	12915000	10421000	6923400	10580000	1054900	984310	1029800	1122900	3861600	3475900	3421700	4057000	C03406	HMDB0000052	16950	2387-71-5	15682	5115	ko00220,ko00250,ko01100,ko01230
MEDN0502	2-Deoxyribose 1-Phosphate	Carboxylic acids and derivatives	Phosphate sugars	213.016	214.024	[M-H]-	C5H11O7P	15302	25593	9	9	14619	13293	16056	13346	127930	147810	186450	144670	612750	578760	1047300	486100	225310	191190	169680	221030	C00672	HMDB0001351	439287	17210-42-3	28542	6182	ko00030,ko00240,ko01100
MEDN0506	N-Acetylglucosamine 1-Phosphate	Carboxylic acids and derivatives	Phosphate sugars	300.048	301.056	[M-H]-	C8H16NO9P	9	9	9	9	9	9	9	9	233530	396380	301020	280960	55672	9	9	72301	249760	227820	233450	269870	C04256	HMDB0001367	440272	6866-69-9	7125	6194	--
MEDN0523	Indole-3-lactic acid	Heterocyclic compounds	Indole and Its derivatives	204.066	205.074	[M-H]-	C11H11NO3	12052	8087.5	7900.1	12343	9	9	9	9	9	9	5739.9	5624.4	64185	66613	63662	30883	8307	7633.4	14157	14883	C02043	HMDB0000671	92904	1821-52-9	24813	5641	--
MEDN0533	Xanthosine	Nucleotide And Its metabolomics	Nucleotide and Its metabolomics	283.068	284.076	[M-H]-	C10H12N4O6	64498	49439	60031	65074	267590	182740	249350	335980	1036900	1016600	1589400	1487000	11157000	18713000	12356000	7400600	5859800	5123300	5842000	6047600	C01762	HMDB0000299	3408	146-80-5	18107	3408	ko00230,ko00232,ko01100,ko02010
MEDN0537	ADP-ribose	Nucleotide And Its metabolomics	Nucleotide and Its metabolomics	558.064	559.072	[M-H]-	C15H23N5O14P2	3486000	4354400	2710100	3755600	656960	747660	560830	687820	1148900	778330	1029500	960310	649290	509300	559850	583380	1572600	1345000	1219800	1276200	C00301	HMDB0001178	6059	20762-30-5	16960	6059	ko00230,ko01100
MEDN0538	UDP-glucose	Nucleotide And Its metabolomics	Nucleotide and Its metabolomics	565.047	566.055	[M-H]-	C15H24N2O17P2	447930	541240	389330	660440	561800	709570	634580	688350	31493000	25587000	20980000	18045000	5801400	3677800	4570800	4274300	11987000	9847200	10822000	10841000	C00029	HMDB0000286	5278	133-89-1	46229	-	ko00040,ko00052,ko00053,ko00240,ko00500,ko00520,ko00524,ko00561,ko01100
MEDN0554	2-(4-Hydroxyphenyl)ethanol	Benzene and substituted derivatives	Benzene and substituted derivatives	137.06	138.068	[M-H]-	C8H10O2	433760	324720	418920	357860	320730	328540	417570	449910	850200	997600	746630	964330	2709100	3731100	3093000	2504600	1009600	973110	1100800	1156100	C06044	HMDB0004284	7044	501-94-0	1879	7044	ko00350,ko01100
MEDN0555	Hydroxyphenyllactic acid	Organic acid And Its derivatives	Organic acid And Its derivatives	181.05	182.058	[M-H]-	C9H10O4	106380	133720	84884	130700	38645	25741	41518	47998	387710	400310	388560	373020	3118100	5094600	3198100	3391000	693040	702620	825110	883440	C03672	HMDB0000755	5723	306-23-0	17385	5723	--
MEDN0562	Indole-3-carbinol	Heterocyclic compounds	Indole and Its derivatives	146.061	147.068	[M-H]-	C9H9NO	50438	50493	48918	55577	40973	42349	56577	53360	19259	16333	14742	20162	114390	124670	104380	106810	49056	55470	52464	47922	-	HMDB0005785	-	700-06-1	24814	-	--
MEDN0570	L-Erythrulose	Carboxylic acids and derivatives	Sugars	119.034	120.042	[M-H]-	C4H8O4	204500	205190	198460	238720	203920	178360	237880	225420	28660	16459	25959	16461	212740	257550	232940	220320	93367	121600	107320	123980	C02045	HMDB0006293	5460032	533-50-6	27913	-	--
MEDN0579	N-lactoyl-phenylalanine	Amino acid and Its metabolomics	Amino acid derivatives	236.092	237.1	[M-H]-	C12H15NO4	441190	427950	419090	467560	499920	380620	496990	530290	18219	16528	19275	25479	135920	81529	112670	54854	151250	147650	171080	172070	-	HMDB0062175	102199091	-	-	-	--
MEDN0586	N-Acetyl-L-alanine	Amino acid and Its metabolomics	Amino acid derivatives	130.05	131.058	[M-H]-	C5H9NO3	560860	496130	548120	532880	575520	532240	590130	606000	47332	68449	58778	52631	575440	641270	440910	581780	250690	264300	288310	299000	-	HMDB0000766	88064	97-69-8	40992	5733	--
MEDN0588	Glycerophosphoric acid	Organic acid And Its derivatives	Phosphoric acids	171.006	172.014	[M-H]-	C3H9O6P	35837000	37883000	32266000	27688000	14533000	30450000	15680000	17730000	43703000	39915000	29458000	24175000	5834400	5651500	4402800	5961000	22315000	18595000	18428000	22805000	C02979	HMDB0000126	754	57-03-4	15978	5161	--
MEDN0593	D-Malic acid	Organic acid And Its derivatives	Organic acid And Its derivatives	133.014	134.022	[M-H]-	C4H6O5	82237	119620	52144	121510	30976	17796	35577	36081	710570	199970	275920	540260	1279300	2947500	1099700	2480100	874720	938400	1116700	1192400	C00497	HMDB0031518	92824	636-61-3	30796	-	ko00650,ko01100
MEDN0602	deoxyguanosine 5'-monophosphate(dGMP)	Nucleotide And Its metabolomics	Nucleotide and Its metabolomics	346.055	347.063	[M-H]-	C10H14N5O7P	303960	561620	174360	558160	56502	59897	38635	36729	1000500	674050	730700	655280	489830	447890	515650	401960	391090	375860	411030	394400	C00362	HMDB0001044	65059	902-04-5	16192	-	ko00230,ko01100
MEDN0604	Tetradecanedioic acid	FA	FFA	257.175	258.183	[M-H]-	C14H26O4	24874	21989	25555	19549	27204	24311	23609	24259	32337	35744	33773	34754	26154	27225	30871	23346	28452	31189	28126	37115	C11002	HMDB0000872	13185	821-38-5	76308	5833	--
MEDN0615	Carbamoyl phosphate	Organic acid And Its derivatives	Phosphoric acids	139.975	140.983	[M-H]-	CH4NO5P	806690	755270	685760	905610	1267500	1460300	1344200	1468600	128760	132050	92320	111870	77287	108300	63307	123490	377920	308620	369380	387850	C00169	HMDB0001096	278	590-55-6	17672	6002	ko00220,ko00230,ko00240,ko00250,ko00910,ko01100,ko01200,ko01230
MEDN0622	Porphobilinogen	Organic acid And Its derivatives	Organic acid And Its derivatives	225.088	226.095	[M-H]-	C10H14N2O4	2864200	2712400	2909900	2345900	2236600	2625900	2559200	2542500	2813400	3948100	3920800	3476700	3014200	2870500	2387200	2382800	1961200	2229400	2268000	2378900	C00931	HMDB0000245	1021	487-90-1	-	-	ko00860,ko01100
MEDN0624	5'-Adenylyl sulfate(APS)	Nucleotide And Its metabolomics	Nucleotide and Its metabolomics	426.012	427.02	[M-H]-	C10H14N5O10PS	14911	17082	12025	19313	9	9	9	9	623040	199020	218010	447100	86433	188680	301740	166480	50066	78423	134830	146190	C00224	HMDB0001003	10238	485-84-7	17709	5933	ko00230,ko00261,ko00920,ko01100
MEDN0632	N-Oleoyl Glycine	Alcohol and amines	Amines	338.27	339.277	[M-H]-	C20H37NO3	46671	40047	49348	43375	39198	37130	40880	39546	45955	45943	48582	43298	46854	50532	54939	49698	41853	46301	45075	50800	-	HMDB0013631	6436908	2601-90-3	73723	-	--
MEDN0636	Ginkgoic acid	Organic acid And Its derivatives	Organic acid And Its derivatives	345.243	346.251	[M-H]-	C22H34O3	47762	52726	36963	36779	118140	74855	136580	117130	76477	64135	28275	57990	48269	41833	38391	38038	47513	69144	41086	73415	C10794	HMDB0033897	5317600	22910-60-7	-	-	--
MEDN0649	Anthranilic acid	Benzene and substituted derivatives	Phenolic acids	136.04	137.048	[M-H]-	C7H7NO2	96287	97685	75912	98440	113750	98982	126980	133350	9	9	9	9	121210	165670	138320	109440	52778	45902	61823	63533	C00108	HMDB0001123	227	118-92-3	30754	6018	ko00380,ko00400,ko01100,ko01230
MEDN0656	Indoleacetaldehyde	Heterocyclic compounds	Indole and Its derivatives	158.061	159.068	[M-H]-	C10H9NO	873570	680410	770060	786020	3313400	2434800	3333500	3462900	365300	423080	542000	467890	1288000	1381800	1465800	1222800	1258900	1240100	1210800	1297500	C00637	HMDB0001190	800	2591-98-2	18086	6068	ko00380,ko01100
MEDN0658	Hexadecanedioic acid	FA	FFA	285.207	286.214	[M-H]-	C16H30O4	113630	100540	94398	105270	63800	63168	66622	76603	49848	57069	53931	49962	59310	58470	61895	50244	56217	61121	55859	70032	C19615	HMDB0000672	10459	505-54-4	73722	5642	ko01100
MEDN0678	Ethylsalicylate	Organic acid And Its derivatives	Organic acid And Its derivatives	165.055	166.063	[M-H]-	C9H10O3	5591800	5177600	5703300	4650800	4435900	4751000	4763800	4828000	5611400	7621600	6597100	6518700	5763900	5403200	4484000	5174500	3775600	4125400	4407900	4315800	-	HMDB0029817	8365	118-61-6	-	-	--
MEDN0682	Octadecanamide	Alcohol and amines	Amines	282.28	283.288	[M-H]-	C18H37NO	31898	36626	31933	27902	25204	18587	23676	22391	46100	47499	34606	29104	40936	29284	36683	38484	30319	31458	29121	30499	C13846	HMDB0034146	31292	124-26-5	34900	-	--
MEDN0689	2,5-Furandicarboxylicacid	Organic acid And Its derivatives	Organic acid And Its derivatives	154.998	156.006	[M-H]-	C6H4O5	3704700	3403300	4069000	3821000	3255000	3648100	3874700	3708900	2890700	3377100	2977800	3406500	3623200	3351200	3242000	3655200	3516600	3285900	3346900	3475300	C20450	HMDB0004812	76720	3238-40-2	84212	7076	--
MEDN0739	4-Hydroxybenzyl alcohol	Benzene and substituted derivatives	Benzene and substituted derivatives	123.045	124.052	[M-H]-	C7H8O2	24956	25068	25010	29948	8878.1	13109	11837	16147	26638	40033	41726	41879	2625.7	8150.4	13369	5052	33911	26672	37255	30224	C17467	HMDB0011724	125	623-05-2	67410	-	--
MEDN0741	Methanesulfonic acid	Organic acid And Its derivatives	Sulfonic acids	94.9803	95.9881	[M-H]-	CH4O3S	302190	361670	294040	315280	273500	213500	323800	283480	43483	37962	32306	69518	1084600	1058900	1115900	919030	384330	352260	364760	338140	C11145	-	6395	75-75-2	-	-	ko00920,ko01100
MEDN0748	Methylparaben	Benzene and substituted derivatives	Phenolic acids	151.04	152.047	[M-H]-	C8H8O3	42781	30299	40663	44224	32408	38308	45364	46191	15514	17683	12561	14482	32915	33494	31714	23039	26151	24720	27185	29890	-	HMDB0032572	7456	99-76-3	31835	-	--
MEDN0765	11,12-EET	FA	Oxidized lipids	319.227	320.235	[M-H]-	C20H32O3	1849.3	1715.2	2243.4	1174.1	2113	2336.8	3035.8	3351.6	7106.1	5282.6	5936.1	4842	10247	14965	14551	8515.8	6604.5	8183.6	10108	12320	-	-	-	123931-40-8	-	-	--
MEDN0766	11-deoxy PGE1	FA	Oxidized lipids	337.238	338.246	[M-H]-	C20H34O4	67885	62046	62693	72268	49039	52681	57593	59003	44390	47815	45303	49767	47371	51276	42830	46386	42870	51675	50960	58774	-	-	5283055	37786-00-8	-	-	--
MEDN0783	9,10-EpOME	-	-	295.227	296.235	[M-H]-	C18H32O3	94637	86767	85398	73797	100330	112890	92963	89246	138550	150790	120670	159010	147990	153590	157320	147440	104460	117460	147960	121800	-	-	-	-	-	-	--
MEDN0811	FFA(9:0)	FA	FFA	157.123	158.131	[M-H]-	C9H18O2	16086	13473	14955	17872	13785	15536	11975	14048	16251	16632	9997.5	12422	17556	12257	16946	6177	14786	12904	12059	12363	C01601	HMDB0000847	8158	112-05-0	29019	5810	--
MEDN0818	N-acetyl-beta-alanine	Amino acid and Its metabolomics	Amino acid derivatives	130.05	131.058	[M-H]-	C5H9NO3	589410	583220	624850	560380	647030	533440	596480	725190	67311	81715	56540	62220	657380	919470	520330	530320	290270	310570	315460	331510	C01073	HMDB0061880	76406	3025-95-4	16682	-	ko00410
MEDN0820	3-Hydroxyglutaric acid	Organic acid And Its derivatives	Organic acid And Its derivatives	147.029	148.037	[M-H]-	C5H8O5	28008	30638	39306	45967	20763	24425	26215	22003	32465	11571	20634	23950	112640	237190	114370	161290	77565	95259	97362	74735	-	HMDB0000428	181976	638-18-6	-	5417	--
MEDN0822	Cysteine glutathione disulfide	Amino acid and Its metabolomics	Small Peptide	425.08	426.088	[M-H]-	C13H22N4O8S2	191220	196560	183710	125290	56070	57402	56890	67420	657200	245070	387820	280110	46023	33995	35338	46741	785300	810550	813760	964460	-	HMDB0000656	53477713	13081-14-6	143243	5628	--
MEDN0827	N-acetylornithine	Amino acid and Its metabolomics	Amino acid derivatives	173.093	174.1	[M-H]-	C7H14N2O3	8631200	8304500	8411600	9311600	8792500	8568600	9432300	9203800	284810	271880	216850	214250	277480	252050	285490	277970	2969800	2866500	2647300	2925200	C00437	HMDB0003357	439232	6205-08-9	16543	-	ko00220,ko01100,ko01210,ko01230
MEDN0832	D-Glucosamine 6-Phosphate	Carboxylic acids and derivatives	Phosphate sugars	258.038	259.151	[M-H]-	C6H14NO8P	10174	11462	7982.8	10816	9	9987.7	11154	10519	84473	81761	79987	107160	478900	348910	405890	466790	246540	215900	249560	289090	C00352	HMDB0001254	439217	3616-42-0	15873	6111	ko00250,ko00520,ko01100,ko04931
MEDN0833	3-Dehydroshikimate	Organic acid And Its derivatives	Organic acid And Its derivatives	171.029	172.037	[M-H]-	C7H8O5	203050	178060	174960	223620	197120	171100	256320	208340	53770	44205	52898	65521	108310	147420	101530	93706	86917	71474	89116	78647	C02637	HMDB0000390	439774	2922-42-1	-	5379	ko00400,ko01100,ko01230
MEDN0844	Stachyose	Carboxylic acids and derivatives	Sugars	665.216	666.222	[M-H]-	C24H42O21	9	9	9	9	9	9	9	9	75021	121420	36150	62071	17607	9062	19715	13370	40824	47002	40024	35563	C01613	HMDB0003553	439531	470-55-3	17164	6951	ko00052,ko01100
MEDN0848	Indole-3-Ethanol	Benzene and substituted derivatives	Benzene and substituted derivatives	160.076	161.084	[M-H]-	C10H11NO	217250	175590	193370	211310	67532	54600	67772	79244	8957.5	6058.5	6932.9	6536.3	3241.4	3757	2836.3	2667.2	42724	45654	50512	41709	C00955	HMDB0003447	10685	526-55-6	17890	6932	ko00380
MEDN0856	2',4'-Dihydroxyacetophenone	Benzene and substituted derivatives	Benzene and substituted derivatives	151.04	152.047	[M-H]-	C8H8O3	42781	30299	40663	44224	32408	38308	45364	46191	15514	17683	12561	14482	32915	33494	31714	23039	26151	24720	27185	29890	C03663	HMDB0029659	6990	89-84-9	18414	-	--
MEDN1006	Uric acid	Organic acid And Its derivatives	Organic acid And Its derivatives	167.021	168.028	[M-H]-	C5H4N4O3	243350	208310	174430	251410	123990	129770	141380	135630	44230	28956	65691	42909	210170	217640	144520	266250	89154	89997	108610	107470	C00366	HMDB0000289	1175	69-93-2	17775	88	ko00230,ko01100,ko04976
MEDN1009	3-hydroxyphenylacetic acid	Organic acid And Its derivatives	Organic acid And Its derivatives	151.04	152.047	[M-H]-	C8H8O3	9399.6	12490	10153	12361	7116.4	5157.8	10236	7995.3	513520	549940	497490	530560	294900	403720	281050	283970	312740	289710	325450	326720	C05593	HMDB0000440	12122	621-37-4	17445	5429	ko00350,ko00360,ko01100
MEDN1012	7-Methylguanine	Nucleotide And Its metabolomics	Nucleotide and Its metabolomics	164.057	165.065	[M-H]-	C6H7N5O	9	9	9	4405.9	9	9	9	9	5565.6	7705	6477.7	3669.8	24076	36038	24643	31931	15993	13330	14342	11023	C02242	HMDB0000897	135398679	578-76-7	28664	-	--
MEDN1017	3-(4-Hydroxyphenyl)-Propionic Acid	Benzene and substituted derivatives	Phenolic acids	165.055	166.063	[M-H]-	C9H10O3	5888100	5592000	6032700	5865900	5703800	6517100	6311600	6342300	6789800	7227300	6486100	6432100	6360000	6685600	6141400	6122600	6364300	5905200	6514800	6438500	C01744	HMDB0002199	10394	501-97-3	32980	4148	--
MEDN1022	5,6-Dimethylbenzimidazole	Heterocyclic compounds	Heterocyclic compounds	145.077	146.084	[M-H]-	C9H10N2	143390	110510	130070	109670	510590	461870	518040	527520	66539	79099	83517	79988	169850	177710	199350	191800	185690	187990	214540	215000	C03114	HMDB0003701	675	582-60-5	15890	-	ko00740,ko00860,ko01100
MEDN1035	13(R)-HODE	FA	Oxidized lipids	295.2	296.235	[M-H]-	C18H32O3	79600	53702	78670	76419	179570	153540	106810	191490	15078	15402	10536	18330	13123	14753	17208	11916	47595	48282	51525	53659	-	-	13723970	10219-69-9	-	-	--
MEDN1045	2-Amino-4,6-pteridinediol	Nucleotide And Its metabolomics	Nucleotide and Its metabolomics	178.038	179.044	[M-H]-	C6H5N5O2	194630	184200	122320	207790	21406	39256	32422	35330	117560	62539	91885	61651	67698	88065	64662	80556	74937	68995	85554	88118	-	-	135403800	119-44-8	-	-	--
MEDN1054	Tetranor-12(R)-HETE	FA	Oxidized lipids	265.18	266.188	[M-H]-	C16H26O3	2392300	3644300	3452400	2623900	5923800	4749600	7760700	6388900	2223100	5228900	2806500	2235700	2260000	2859400	2894300	2645500	3847600	5011700	4281100	4570100	-	-	90469827	135271-51-1	-	-	--
MEDN1055	D-Calcium Pantothenate	CoEnzyme and vitamins	CoEnzyme and vitamins	437.214	438.221	[M-H]-	C18H34N2O10	10634	14425	8446.3	17153	6648	6059.5	8446.2	11855	70687	77128	73491	81875	1575500	1848900	2567100	1474800	138400	154740	130210	154720	-	-	443753	137-08-6	-	-	--
MEDN1056	Iminodiacetic acid	Organic acid And Its derivatives	Organic acid And Its derivatives	132.03	133.037	[M-H]-	C4H7NO4	4282700	4189800	4824800	4663700	2683200	3605000	2473200	2499900	3394300	3519500	3539700	3267300	62959000	59261000	56434000	65514000	16077000	14303000	16653000	18313000	C19911	HMDB0011753	8897	142-73-4	24786	-	--
MEDN1066	Gly-Val	Amino acid and Its metabolomics	Small Peptide	173.093	174.1	[M-H]-	C7H14N2O3	148030	87967	159140	135150	91778	105110	134620	180550	7331.9	6083.7	8585.8	8915.7	17953	28560	20117	21949	21165	18327	22356	19595	-	HMDB0028854	2724807	1963-21-9	73922	-	--
MEDN1076	N6-isopentene adenine	Nucleotide And Its metabolomics	Nucleotide and Its metabolomics	202.109	203.117	[M-H]-	C10H13N5	41658	38444	35205	42749	84018	72019	80799	84497	11750	12278	9430.4	9199.7	71007	74735	79548	71027	38130	30388	34389	38605	-	-	92180	2365-40-4	-	-	--
MEDN1078	cis-EODA	FA	Oxidized lipids	297.243	298.251	[M-H]-	C18H34O3	410080	408930	494540	462840	456240	455980	454230	467350	434700	412410	420430	413900	422180	471470	422530	412380	421110	405940	455580	457410	C19418	HMDB0061650	119250	2443-39-2	85661	-	--
MEDN1087	UDP-D-galactose	Carboxylic acids and derivatives	Sugars	565.047	566.055	[M-H]-	C15H24N2O17P2	447930	541240	389330	660440	561800	709570	634580	688350	31493000	25587000	20980000	18045000	5801400	3677800	4570800	4274300	11987000	9847200	10822000	10841000	C00052	HMDB0000302	18068	2956-16-3	67119	5291	ko00052,ko00520,ko01100
MEDN1092	4-acetoxyphenol	Benzene and substituted derivatives	Phenolics	151.026	152.047	[M-H]-	C8H8O3	2375800	1200800	1673700	3197800	4113300	4463300	4433500	4389600	5807700	2557700	4658900	3392800	18169000	18092000	13044000	23236000	5372400	4393900	5251500	5762900	C13636	-	96009	3233-32-7	-	-	ko01100
MEDN1108	1,6-anhydro-β-D-glucose	Carboxylic acids and derivatives	Sugars	161.045	162.053	[M-H]-	C6H10O5	12205	17170	11069	5666.9	4428.8	8841.7	7632.8	7828.1	189870	185490	159070	173760	25254	26821	9409.2	5733.9	65725	60909	72515	78453	-	HMDB0000640	724705	498-07-7	30997	5613	--
MEDN1112	16-Hydroxyhexadecanoic acid	FA	FFA	271.227	272.235	[M-H]-	C16H32O3	258010	197550	213830	244630	493310	408210	633610	607400	150620	166880	175120	97573	385480	453320	439730	334890	323320	339340	340380	341950	-	HMDB0006294	10466	506-13-8	55328	-	--
MEDN1117	Uridine-5'-diphospho-N-acetylgalactosamine disodium salt	Nucleotide And Its metabolomics	Nucleotide and Its metabolomics	606.074	607.082	[M-H]-	C17H27N3O17P2	55812	66091	40465	59857	48685	46915	49805	48771	586490	355140	348690	345930	91050	81684	59576	51259	252330	203910	219920	228960	C00203	HMDB0000290	445675	528-04-1	16264	5281	ko00520,ko01100
MEDN1119	Trans dehydrorosinone	Aldehyde,Ketones,Esters	Ketones	287.201	288.209	[M-H]-	C19H28O2	9	9	9	9	9	9	3138.3	2351.8	9696.3	9455.7	8614.5	11769	10311	15546	12133	9352.2	12114	12598	13544	12711	-	-	5881	53-43-0	-	-	--
MEDN1125	N,N′-dicyclohexylcarbodiimide	Alcohol and amines	Polyamines	205.17	206.178	[M-H]-	C13H22N2	19801000	17406000	19523000	19812000	46424000	34725000	30409000	46757000	12311000	11506000	11508000	11411000	12157000	12070000	11457000	12267000	16181000	15309000	18707000	17527000	-	-	10868	538-75-0	-	-	--
MEDN1139	DL-2-hydroxystearic acid	FA	FFA	299.259	300.266	[M-H]-	C18H36O3	28604	32196	34511	21765	29156	29655	49012	60016	17965	23243	30363	6403.8	8536.8	27593	17717	15474	18775	33546	40766	40387	-	-	69417	629-22-1	-	-	--
MEDN1145	P-chlorophenylalanine	Benzene and substituted derivatives	Phenolic acids	198.032	199.04	[M-H]-	C9H10ClNO2	651500	643350	736650	667170	671490	729440	659040	721450	561120	603850	595230	584440	470730	451210	460980	518390	540460	525860	599420	606740	-	-	4652	7424-00-2	-	-	--
MEDN1148	2-hydroxyhexadecanoic acid	FA	FFA	271.227	272.235	[M-H]-	C16H32O3	258010	197550	213830	244630	493310	408210	633610	607400	150620	166880	175120	97573	385480	453320	439730	334890	323320	339340	340380	341950	-	HMDB0031057	92836	764-67-0	75972	-	--
MEDN1149	N-hexadecyl hydroxyproline	Amino acid and Its metabolomics	Amino acid derivatives	709.61	355.309	[2M-H]-	C21H41NO3	55893	34070	44696	87260	524460	550180	567600	699460	9	9	9	9	1898.9	3947.9	1623.3	1204.7	89483	70770	92554	101630	-	-	66690736	76652-69-2	-	-	--
MEDN1159	FFA(15:1)	FA	FFA	239.201	240.209	[M-H]-	C15H28O2	188500	288150	355730	153250	150860	120190	248130	217310	422220	576080	548870	71482	163070	132380	105730	64976	331260	339610	344270	393640	-	-	5312411	84743-29-3	-	-	--
MEDN1167	4-Hydroxybenzoic Acid	Benzene and substituted derivatives	Phenolic acids	137.024	138.032	[M-H]-	C7H6O3	494900	490110	453000	437920	368290	454800	442250	494150	976730	1068200	920390	1124900	3151800	4413600	3386200	2710000	1228100	1003000	1224400	1137700	C00156	HMDB0000500	135	99-96-7	30763	5486	ko00130,ko00790,ko01100
MEDN1183	Multifidol	Benzene and substituted derivatives	Phenolics	209.081	210.089	[M-H]-	C11H14O4	15648	10691	10232	9258.4	8166.9	11521	12710	9881.5	19028	21393	19374	18704	9819.7	10712	11993	13212	17847	16092	14524	11998	C10709	-	12892	125074-06-8	-	-	--
MEDN1212	7alpha,12beta-Dihydroxy-5alpha-cholan-24-oic acid	Tryptamines,Cholines,Pigments	Cholines	783.6	392.293	[2M-H]-	C24H40O4	9	9	9	9	9	9	9	9	12619	3758.8	9251	2857.6	9	9	9	9	11053	13241	15627	11184	-	-	5283842	-	-	-	--
MEDN1213	2-(4-hydroxyphenyl) propionate	Benzene and substituted derivatives	Phenolic acids	165.06	166.063	[M-H]-	C9H10O3	591480	603100	473090	566700	188410	176480	184830	211140	2370500	2630000	2394500	2269600	7080100	9890200	5760000	5689700	2471500	2299600	2616100	2637700	-	HMDB0041683	102526	938-96-5	-	-	--
MEDN1224	Bis(1-inositol) -3,1'-phosphate 1-phosphate	Alcohol and amines	Alcohols	501	502.049	[M-H]-	C12H24O17P2	9	9	9	9	9	9	9	9	20223	19256	24449	31029	2461.9	3553.2	2984.4	2812.7	4760.4	5745.4	6623.9	6432.9	C19799	-	53262311	-	-	-	ko00562
MEDN1226	2-amino-4-oxovaleric acid	Organic acid And Its derivatives	Organic acid And Its derivatives	130.05	131.058	[M-H]-	C5H9NO3	589410	583220	624850	560380	647030	533440	596480	725190	67311	81715	56540	62220	657380	919470	520330	530320	290270	310570	315460	331510	C03341	-	6184	4439-83-2	-	-	ko00472,ko01100
MEDN1235	L-2-amino-6-oximelic acid	Organic acid And Its derivatives	Organic acid And Its derivatives	188.057	189.064	[M-H]-	C7H11NO5	309870	313270	287810	335200	354670	289670	337890	325870	1571300	1103800	1215400	1430800	7319000	6430200	5748300	6079800	2248900	2037700	2193300	2044700	C03871	-	194695	75650-93-0	-	-	ko00300,ko01100,ko01230
MEDN1236	Cyclic ADP ribose	Nucleotide And Its metabolomics	Nucleotide and Its metabolomics	540.1	541.061	[M-H]-	C15H21N5O13P2	169290	179770	105190	154950	31509	41199	36471	39598	5479400	4265100	4694700	4558300	2654800	2891900	2707100	2792100	2503000	2375500	2702900	2967900	C13050	-	583439	119340-53-3	-	-	ko04020,ko04921,ko04970,ko04972
MEDN1239	5-O-(1-carboxyvinyl) -3-phosphate	Organic acid And Its derivatives	Phosphoric acids	323.028	324.025	[M-H]-	C10H13O10P	528260	792040	412900	764830	86941	107480	98633	118800	1741900	1076300	1296900	919460	755150	551990	694090	648450	543880	518030	527720	596730	C01269	-	439463	89771-75-5	-	-	ko00400,ko01100,ko01230
MEDN1241	2-(α-D-mannosyl) -3-phosphate glyceride	Alcohol and amines	Amines	347.038	348.046	[M-H]-	C9H17O12P	113120	218210	70378	199160	21034	10653	22146	21496	418580	265970	332950	312910	216450	224830	215480	187830	174040	156060	172450	150330	C11516	-	13686	-	-	-	ko00051,ko01100
MEDN1246	3-(pyrazol-1-yl) -L-alanine	Amino acid and Its metabolomics	Amino acid derivatives	154.062	155.069	[M-H]-	C6H9N3O2	1866300	1758100	1813200	1974700	1540600	1497100	1506000	1680600	5757600	4026400	4242700	4703100	3714700	4535400	3728400	3356300	2755000	2678100	2832300	3020400	C01162	-	151491	2734-48-7	-	-	--
MEDN1247	1-pyrroline-4-hydroxy-2-carboxylate	Heterocyclic compounds	Heterocyclic compounds	128.035	129.043	[M-H]-	C5H7NO3	629990	619840	687050	679550	751520	650640	729600	735340	21211	31421	30975	27534	270720	298730	288950	281220	198120	170310	217470	214490	C04282	HMDB0002234	440282	9054-77-7	16352	6564	ko00330,ko01100
MEDN1270	LPE(22:6/0:0)	GP	LPE	524.279	525.286	[M-H]-	C27H44NO7P	38330	27390	26155	30930	20356	22994	44512	55153	20282	18387	12896	14893	9083	7414.4	9198	6454.7	19379	16915	17421	26467	-	-	-	-	-	-	--
MEDN1271	LPE(0:0/20:2)	GP	LPE	504.311	505.317	[M-H]-	C25H48NO7P	23784	17193	13474	27108	104760	91279	101110	152980	9	9	125.52	9	9	9	9	9	16707	15975	20702	19489	-	-	-	-	-	-	--
MEDN1272	LPE(20:2/0:0)	GP	LPE	504.311	505.317	[M-H]-	C25H48NO7P	23784	17193	13474	27108	104760	91279	101110	152980	9	9	125.52	9	9	9	9	9	16707	15975	20702	19489	-	-	-	-	-	-	--
MEDN1276	LPE(20:4/0:0)	GP	LPE	500.28	501.286	[M-H]-	C25H44NO7P	50991	20020	27902	38017	980840	774150	1061800	1235700	15062	3561.1	6163.5	4786.2	9	9	9	9	232550	237050	252860	275140	-	-	-	-	-	-	--
MEDN1279	LPE(0:0/18:0)	GP	LPE	480.309	481.317	[M-H]-	C23H48NO7P	502550	459090	410080	442350	1345800	1382900	1614000	1786100	39698	24558	25678	32507	37164	57891	48030	45319	618760	608910	671410	708070	-	-	-	-	-	-	--
MEDN1282	LPE(0:0/18:2)	GP	LPE	476.279	477.286	[M-H]-	C23H44NO7P	731350	718940	614080	916270	7764500	6991000	9010000	11086000	39807	29065	29051	30290	15237	24339	21619	16354	830170	723090	1031600	781770	-	-	-	-	-	-	--
MEDN1285	LPE(0:0/16:0)	GP	LPE	452.278	453.286	[M-H]-	C21H44NO7P	410340	367820	329740	421980	599060	656120	776790	848440	35320	22809	23643	29999	94973	127410	108660	88722	303020	304400	325070	342870	-	-	-	-	-	-	--
MEDN1287	LPE(0:0/16:1)	GP	LPE	450.264	451.27	[M-H]-	C21H42NO7P	84518000	76717000	63160000	91219000	172920000	164230000	173870000	159350000	1013000	315370	331380	410560	63685000	87937000	69271000	64474000	118200000	115170000	122950000	131570000	-	-	-	-	-	-	--
MEDN1288	Glycine linoleate	GL	DG	336.254	337.262	[M-H]-	C20H35NO3	5505.8	7868.9	9947.7	10863	30693	6875.8	10797	13765	1636.1	1982.6	1289.9	1569.6	2742.2	2155.6	3402.9	2278.8	3025.3	3679	4860.2	3633.3	-	-	-	-	-	-	--
MEDN1302	D-Inositol-1,4-diphosphate	Alcohol and amines	Alcohols	338.988	339.996	[M-H]-	C6H14O12P2	9	9	9	9	9	9	9	9	3329800	1436700	972360	4491300	81029	115750	126920	40409	370060	456070	696060	519660	-	-	439444	74465-19-3	-	-	--
MEDN1312	2-hydroxyphenylacetic acid	Organic acid And Its derivatives	Organic acid And Its derivatives	151	152.047	[M-H]-	C8H8O3	70887	70069	63081	66555	63825	54265	67874	71728	80019	79361	74248	86934	78017	150650	105930	103640	74627	69925	74945	85751	C05852	HMDB0000669	11970	614-75-5	28478	5639	ko00360,ko01100
MEDN1315	4-Hydroxy-3-methylbenzoic acid	Organic acid And Its derivatives	Organic acid And Its derivatives	151	152.047	[M-H]-	C8H8O3	70887	70069	63081	66555	63825	54265	67874	71728	80019	79361	74248	86934	78017	150650	105930	103640	74627	69925	74945	85751	-	HMDB0004815	68138	499-76-3	85239	-	--
MEDN1320	2-Hydroxy-2-methylbutyric acid	Organic acid And Its derivatives	Organic acid And Its derivatives	117	118.063	[M-H]-	C5H10O3	91311	92910	83847	94833	48791	52299	57075	63249	36861	30752	33130	41175	307690	358510	288200	234110	78901	70288	80971	89389	-	HMDB0001987	95433	3739-30-8	68454	6416	--
MEDN1328	(S)-Leucic acid	Organic acid And Its derivatives	Organic acid And Its derivatives	131	132.079	[M-H]-	C6H12O3	488180	496720	402600	497470	254940	230550	264040	279890	1553400	1432600	1251500	1081900	5919600	8842500	5719100	5409100	1505400	1474600	1627900	1690700	-	HMDB0000746	83697	13748-90-8	44510	5714	--
MEDN1332	Adenosine-5'-Diphosphoglucose	Nucleotide And Its metabolomics	Nucleotide and Its metabolomics	588	589.082	[M-H]-	C16H25N5O15P2	24445	34684	18688	22021	4724.1	8910.2	7136.5	11023	41765	27400	29047	21241	9	9	9	9	24881	14301	13767	15063	-	-	16218835	102129-65-7	-	-	--
MEDN1398	8-Aminooctanoic Acid	Organic acid And Its derivatives	Organic acid And Its derivatives	158.119	159.126	[M-H]-	C8H17NO2	20797	17939	17267	21059	70776	64385	80855	78697	12841	6318.9	11832	13365	32296	32737	35715	29964	27414	28671	29417	29552	-	-	66085	1002-57-9	-	-	--
MEDN1406	Tridecanedioic acid	FA	FFA	243.161	244.167	[M-H]-	C13H24O4	73893	69441	73045	71030	100950	67680	125240	63148	81929	105470	79710	98554	104590	75070	78112	73999	103440	100900	115850	113500	-	-	10458	505-52-2	-	-	--
MEDN1410	N-Palmitoylglycine	Amino acid and Its metabolomics	Amino acid derivatives	312.256	313.262	[M-H]-	C18H35NO3	85683	65069	78178	98316	153650	118000	166340	170740	53048	51295	60908	45574	69764	74964	64184	59240	114570	102940	107440	106320	-	HMDB0013034	151008	2441-41-0	479285	-	--
MEDN1415	13(S)-HOTrE(γ)	FA	Oxidized lipids	293.212	294.219	[M-H]-	C18H30O3	48765	37875	28959	22829	10266	15576	26976	22987	8580.3	13927	10682	10550	11688	14095	9747.7	13942	13781	15847	15069	12210	-	-	5282971	74784-20-6	-	-	--
MEDN1426	9(S),12(S),13(S)-TriHOME	FA	Oxidized lipids	329.233	330.241	[M-H]-	C18H34O5	55112	46469	44231	58273	56656	47141	54976	72025	192540	141460	148380	167030	42996	51291	51667	35059	160960	150970	165720	178550	C14833	HMDB04708	9858729	97134-11-7	34506	-	ko00591
MEDN1475	Sorbitol 6-phosphate	Carboxylic acids and derivatives	Phosphate sugars	523.082	262.045	[2M-H]-	C6H15O9P	9	9	9	9	9	9	9	9	11830000	9228800	11673000	17444000	146730	109500	117940	100180	1455500	1325900	1397500	1428100	C01096	HMDB0005831	152306	20479-58-7	743019	-	ko00051,ko01100
MEDN1476	Allantoic acid	Amino acid and Its metabolomics	Amino acid derivatives	175.046	176.054	[M-H]-	C4H8N4O4	9	9	9	9	9	9	9	9	14019	14804	15537	7354.4	188220	210160	180480	184460	24617	30166	34974	28596	C00499	HMDB0001209	203	99-16-1	30837	343	ko00230,ko01100
MEDN1477	D-Mannitol 1-phosphate	Carboxylic acids and derivatives	Phosphate sugars	523.083	262.045	[2M-H]-	C6H15O9P	82436	52360	92211	67697	297180	600690	306460	561200	68821000	57117000	60717000	83360000	3266600	1476200	1646400	1107800	23563000	17861000	20706000	22322000	C00644	HMDB0001530	130418	15806-48-1	16298	6302	ko00051,ko01100
MEDN1478	Glu-Gln	Amino acid and Its metabolomics	Small Peptide	274.104	275.112	[M-H]-	C10H17N3O6	434930	489160	634460	434040	653660	597370	534970	572500	44568	36100	18189	39750	166660	192420	152750	143220	215630	279220	287610	231270	C05283	-	150914	-	-	-	--
MEDN1479	N-palmitoyl taurine	Organic acid And Its derivatives	Sulfonic acids	362.235	363.244	[M-H]-	C18H37NO4S	756220	509980	834170	953760	2596900	1640200	2541000	2543400	15441	9178.3	11835	7903.9	120780	180950	171880	112560	413370	389260	418930	446990	-	-	14504290	83982-06-3	-	-	--
MEDN1480	N-Arachidonoyl-L-Alanine	Amino acid and Its metabolomics	Amino acid derivatives	374.267	375.277	[M-H]-	C23H37NO3	200110	124980	190100	268630	510980	345820	614030	601520	2589.8	2103.8	2372.7	2052.3	42204	60923	56571	38057	128350	111350	122060	106830	-	-	40846579	401941-73-9	-	-	--
MEDN1484	Ethionamide	Heterocyclic compounds	Pteridines and derivatives	165.041	166.056	[M-H]-	C8H10N2S	2778100	2514500	2880900	2270600	2204100	2306400	2451700	2391900	2776500	3766000	3443800	3195900	2924400	2867000	2180900	2533600	1937800	2053700	2105100	2181400	-	-	-	536-33-4	-	-	--
MEDN1485	Glycerophospho-N-Arachidonoyl Ethanolamine	GP	LPE	500.277	501.285	[M-H]-	C25H44NO7P	3083000	2911400	3191300	3258600	2433500	2370500	2678700	2973100	2435200	2152000	2458900	2411000	2066400	2210100	1923900	2061900	3246300	3461300	3639800	3533700	-	-	-	201738-25-2	-	-	--
MEDN1490	FFA(16:2)	FA	FFA	251.201	252.209	[M-H]-	C16H28O2	9141.6	6606.9	7364.5	6999	3976.6	12450	12297	14759	10205	9672	8820.7	9089.3	13815	10872	9789.5	9230.4	11101	10123	11404	13977	-	-	-	-	-	-	--
MEDN1492	(R)-(-)-Mandelic acid	Organic acid And Its derivatives	Organic acid And Its derivatives	151.041	152.047	[M-H]-	C8H8O3	9	9	9	9	9	9	9	9	64789	69740	65515	66358	36631	52203	45834	42113	41691	36457	39127	42707	-	HMDB0062635	11914	611-71-2	17656	-	--
MEDN1493	(R)-3-Hydroxybutanoic acid	Organic acid And Its derivatives	Organic acid And Its derivatives	103.041	104.047	[M-H]-	C4H8O3	11164	9684.9	10077	10535	15786	9571	9658.7	12303	53276	64289	91105	86027	110030	100010	81406	101180	65429	61850	54411	82654	-	HMDB0000011	92135	625-72-9	17066	-	--
MEDN1499	2-Hydroxyhexanoic acid	Organic acid And Its derivatives	Organic acid And Its derivatives	131.071	132.079	[M-H]-	C6H12O3	3384600	3515800	2892800	3481500	1753100	1592600	1783600	1855000	10776000	9582700	8705700	7550300	41250000	60356000	39661000	39609000	10696000	10303000	11128000	11855000	-	HMDB0001624	99824	6064-63-7	86542	6332	--
MEDN1501	2'-O-methyluridine	Nucleotide And Its metabolomics	Nucleotide and Its metabolomics	257.08	258.085	[M-H]-	C10H14N2O6	9	9	9	9	9	9	9	9	70916	73868	61740	61032	16602	20894	19620	19363	25011	22325	22513	31761	-	HMDB0240328	102212	2140-76-3	-	-	--
MEDN1504	3-Hydroxycinnamic acid	Organic acid And Its derivatives	Organic acid And Its derivatives	163.044	164.047	[M-H]-	C9H8O3	55011	49652	49510	49095	49808	54901	52820	51144	58104	55031	60667	53818	53497	53502	56029	50079	55273	50660	55056	51282	-	HMDB0001713	637541	14755-02-3	32357	305	--
MEDN1513	5-Hydroxy-2'-deoxyuridine	Nucleotide And Its metabolomics	Nucleotide and Its metabolomics	243.065	244.07	[M-H]-	C9H12N2O6	118200	113050	89582	117790	50989	45947	55566	68169	214170	260600	239110	205310	459490	541160	418000	443820	187570	195930	191250	209380	-	-	96622	5168-36-5	-	-	--
MEDN1516	6-Hydroxyflavone (6-HF)	Benzene and substituted derivatives	Benzene and substituted derivatives	237.056	238.063	[M-H]-	C15H10O3	30008	23445	7038.9	42245	9	9	19022	48108	9	10691	9	9	3698.8	9	9	9	12062	11147	13086	11542	C14137	HMDB0141530	72279	6665-83-4	34472	-	--
MEDN1518	Acetylvaline	Amino acid and Its metabolomics	Amino acid derivatives	158.084	159.09	[M-H]-	C7H13NO3	24686	29025	28081	29667	18731	17817	21781	25008	83944	84725	82461	69280	344650	469500	328860	355320	113730	96736	105940	102970	-	HMDB0011757	66789	96-81-1	-	-	--
MEDN1527	Cyclo(his-pro)	Amino acid and Its metabolomics	Small Peptide	233.104	234.112	[M-H]-	C11H14N4O2	445340	369050	360510	538090	367060	365980	400910	437710	9	9	9	9	215250	295360	254070	336110	91131	80171	96021	127480	C05302	-	449094	53109-32-3	-	-	ko00140
MEDN1530	D-(+)-Cellobiose	Carboxylic acids and derivatives	Sugars	103.04	342.116	[M-H]-	C12H22O11	117420	117290	125560	139210	137490	115100	143910	132940	589660	949530	1305400	1182700	1839700	1473100	1013600	1317100	858760	928780	855080	953230	-	HMDB0000055	10712	528-50-7	36217	3480	--
MEDN1532	D-Galacturonic Acid	Carboxylic acids and derivatives	Sugar acids	193.036	194.043	[M-H]-	C6H10O7	9	9	9	9	9	9	9	9	67327	58813	70872	66774	31936	9	27980	28412	61132	55516	56491	51775	C00333	HMDB0002545	439215	685-73-4	47962	6713	ko00040,ko00053,ko00520,ko01100,ko02010
MEDN1533	Dimethylmalonic acid	Organic acid And Its derivatives	Organic acid And Its derivatives	131.036	132.042	[M-H]-	C5H8O4	9779.3	11594	12963	10777	12000	7951.9	9240.8	16763	384180	415300	404190	435070	5071700	6765600	6624700	6435500	1856000	1668800	1926600	1946600	-	HMDB0002001	11686	595-46-0	111517	6425	--
MEDN1538	GalactinolHydrate	Carboxylic acids and derivatives	Sugar alcohols	103.04	342.116	[M-H]-	C12H22O11	117420	117290	125560	139210	137490	115100	143910	132940	589660	949530	1305400	1182700	1839700	1473100	1013600	1317100	858760	928780	855080	953230	-	HMDB0005826	439451	3687-64-7	17505	-	--
MEDN1539	Genipin	Heterocyclic compounds	Heterocyclic compounds	225.077	226.084	[M-H]-	C11H14O5	5302.6	4482.3	4432.9	5938.5	2492.4	4570.1	4238.7	9	53600	59346	46908	46202	76755	89214	59305	75613	30717	37755	42949	45293	C09780	HMDB0035830	442424	6902-77-8	-	-	--
MEDN1542	Glycogen	Carboxylic acids and derivatives	Sugars	665.216	666.222	[M-H]-	C24H42O21	9	9	9	9	9	9	9	9	75021	121420	36150	62071	17607	9062	19715	13370	40824	47002	40024	35563	-	HMDB0000757	439177	9005-79-2	28087	160	--
MEDN1548	Val-Ala	Amino acid and Its metabolomics	Small Peptide	187.097	188.116	[M-H]-	C8H16N2O3	101310	95956	114130	101490	113690	97415	108970	110320	156080	154750	139740	152620	120120	120300	105530	104400	144540	131290	146020	139890	-	-	6992638	27493-61-4	-	-	--
MEDN1554	Isethionic acid	Organic acid And Its derivatives	Sulfonic acids	124.996	125.999	[M-H]-	C2H6O4S	7731.9	7305	8079.5	6466	9	9	9	9	24286	13257	18011	26904	49807	64795	52165	57239	25384	29480	25763	19403	C05123	HMDB0003903	7866	1562-00-1	1157	6987	ko00430,ko01100
MEDN1567	Phosphonoacetic acid	Organic acid And Its derivatives	Phosphoric acids	138.554	139.987	[M-H]-	C2H5O5P	39316	53044	43706	43024	9	9	9	9	1820400	1402100	937770	1129700	376560	342560	203280	476760	752550	730380	602930	790970	C02380	HMDB0004110	546	4408-78-0	15732	7018	ko00983,ko04976
MEDN1576	Sucrose 6′-monophosphate	Carboxylic acids and derivatives	Phosphate sugars	421.051	422.083	[M-H]-	C12H23O14P	48020	9	9	9	9	9	9	9	417170	393120	456140	375560	117980	124420	116540	104500	191380	177060	157740	167880	-	-	439762	36064-19-4	-	-	--
MEDN1586	Thymidine-5'-phosphate(dTMP)	Nucleotide And Its metabolomics	Nucleotide and Its metabolomics	321.051	322.057	[M-H]-	C10H15N2O8P	246520	345050	190650	276840	30887	40790	31185	49945	402250	307100	356760	342100	102200	88469	127890	94498	373090	330260	383250	384210	-	HMDB0001227	9700	365-07-1	17013	6092	--
MEDN1595	Xanthosine-5'-monophosphate	Nucleotide And Its metabolomics	Nucleotide and Its metabolomics	363.035	364.042	[M-H]-	C10H13N4O9P	13883	17636	14016	17802	9	9	9	9	66536	49835	85801	56622	245580	194780	341460	192700	175330	168120	249710	205980	-	HMDB0001554	73323	25899-70-1	15652	-	--
MEDN1602	3-Deoxyguanosine	Nucleotide And Its metabolomics	Nucleotide and Its metabolomics	266.089	267.097	[M-H]-	C10H13N5O4	39942	44018	30787	24722	4764	19322	10895	24397	61995	38759	36124	49127	43862	69097	85693	47452	31900	26299	47340	44507	-	HMDB0000085	135440068	3608-58-0	17172	3395	--
MEDN1604	3-hydroxy-tetradecanoic acid	Organic acid And Its derivatives	Organic acid And Its derivatives	243.195	244.204	[M-H]-	C14H28O3	68404000	61253000	59266000	74825000	41683000	46236000	48632000	58117000	469590	380880	240840	240750	380040	424710	351600	281380	22110000	20753000	23839000	25387000	-	HMDB0010731	16064	1961-72-4	42539	-	--
MEDN1606	Acetanilide	Benzene and substituted derivatives	Benzene and substituted derivatives	134.061	135.068	[M-H]-	C8H9NO	69462	82498	66178	73634	30389	31878	31746	33187	471470	444350	446000	362240	1948900	2865100	2027200	2218300	604630	614750	614770	661760	C07565	HMDB0001250	904	103-84-4	28884	6107	--
MEDN1612	Cytidine 2',3'-cyclic monophosphoric acid	Nucleotide And Its metabolomics	Nucleotide and Its metabolomics	304.034	305.041	[M-H]-	C9H12N3O7P	124580	99951	121440	106430	84585	108690	133790	124440	206840	202900	194150	200740	32817	33492	33302	30643	132650	133680	122880	133980	C02354	HMDB0011691	91746159	633-90-9	-	-	ko00240,ko01100
MEDN1614	D-Arabinose 5-phosphate	Carboxylic acids and derivatives	Phosphate sugars	229.011	230.019	[M-H]-	C5H11O8P	1386400	1542400	1230200	1178800	267720	573320	413060	402540	29050000	16189000	9303400	13796000	1496300	2171200	1350800	1274300	4137100	4049800	3334100	4236900	C01112	HMDB0011734	188324	13137-52-5	16241	-	ko01100
MEDN1615	Ile-Pro-Ile	Amino acid and Its metabolomics	Small Peptide	340.223	341.231	[M-H]-	C17H31N3O4	696360	621410	694400	715480	449110	527870	369860	609880	9	9	9	9	9	112830	118540	69897	190440	172730	220010	216750	-	-	94701	90614-48-5	-	-	--
MEDN1621	Isocitric acid	Organic acid And Its derivatives	Organic acid And Its derivatives	173.009	192.027	[M-H2O-H]-	C6H8O7	2375200	2487800	2322000	2495400	2409800	2542900	2590600	2701500	87750	78960	55999	65407	70625	122180	66811	83271	858570	832030	757520	865310	C00311	HMDB0000193	1198	320-77-4	30887	3328	ko00020,ko00630,ko01100,ko01200,ko01210,ko01230,ko04922,ko05230
MEDN1631	UDP-xylose	Carboxylic acids and derivatives	Sugars	535.035	536.044	[M-H]-	C14H22N2O16P2	9	9	9	9	9	9	9	9	103120	97346	83119	76020	2951	3877	9	9	27537	26386	22126	22062	C00190	HMDB0001018	19235	3616-06-6	16082	5948	ko00520,ko01100
MEDN1639	Glu-Thr	Amino acid and Its metabolomics	Small Peptide	229.082	248.101	[M-H2O-H]-	C9H16N2O6	1545800	1392400	1647100	1425900	1099500	1197500	1165600	1355200	139100	122520	111820	137300	1092200	1110900	1007500	782520	551580	461970	526450	572530	-	HMDB0028829	6998031	6875-80-5	73510	-	--
MEDN1653	D-Glucose 1,6-bisphosphate	Carboxylic acids and derivatives	Phosphate sugars	338.989	339.996	[M-H]-	C6H14O12P2	6512.5	8480.1	8862	14809	9109.4	6012.2	8137.5	10829	375000	239620	207840	537620	21748	18738	23706	17230	62335	69557	99843	96694	C01231	HMDB0003514	5459969	10139-18-1	18148	-	ko00500,ko01100
MEDN1654	Gemfibrozil	Benzene and substituted derivatives	Benzene and substituted derivatives	249.15	250.157	[M-H]-	C15H22O3	62321	49603	96523	78683	13814000	9045900	436380	18449000	69589	52401	37255	39849	51752	45888	38492	36794	1723300	1494000	1615800	1716500	C07020	HMDB0015371	3463	25812-30-0	5296	-	--
MEDN1669	N-AcetyTryptophan	Amino acid and Its metabolomics	Amino acid derivatives	245.093	246.1	[M-H]-	C13H14N2O3	5290.3	4375.2	4434.8	5623.2	5871.1	3945.2	4785.5	5391.9	2619.3	9549.2	8124.2	3899.7	6809.5	12179	10584	5751.3	3549.4	6856	6857.2	7647.6	-	HMDB0013713	-	1218-34-4	74640	-	--
MEDN1675	2-Deoxyribose-5'-phosphate	Nucleotide And Its metabolomics	Nucleotide and Its metabolomics	213.017	214.024	[M-H]-	C5H11O7P	9	9	9	9	16936	25745	48673	9	9	29108	25899	7849	30159	23627	36995	26582	27121	25645	16202	26282	C00673	-	-	102916-66-5	-	-	ko00030,ko01100
MEDN1678	Uridine 5′-diphosphoglucuronic acid	Nucleotide And Its metabolomics	Nucleotide and Its metabolomics	578.9	580.034	[M-H]-	C15H22N2O18P2	9	9	9	9	9	9	9	9	1052100	588440	564540	770760	208700	301010	252290	192020	257530	225500	392540	363260	C00167	HMDB0000935	17473	2616-64-0	17200	5884	ko00040,ko00053,ko00520,ko01100
MEDN1686	L-threo-3-Methylaspartate	Amino acid and Its metabolomics	Amino acid derivatives	146.047	147.053	[M-H]-	C5H9NO4	6721200	7015400	6972900	7249000	5979400	5976000	5762500	5579900	622410	543210	592870	506020	2205300	3906100	2632800	2985100	1968400	1783600	2204200	2256600	C03618	-	-	6061-13-8	-	-	ko00630,ko00660,ko01100,ko01200
MEDN1706	3-(2-Hydroxyphenyl)propanoic acid	Benzene and substituted derivatives	Phenolic acids	165.055	166.063	[M-H]-	C9H10O3	5888100	5592000	6032700	5865900	5703800	6517100	6311600	6342300	6789800	7227300	6486100	6432100	6360000	6685600	6141400	6122600	6364300	5905200	6514800	6438500	-	HMDB0033752	873	495-78-3	16104	-	--
MEDN1710	Palatinose	Heterocyclic compounds	Heterocyclic compounds	341.108	342.116	[M-H]-	C12H22O11	9	9	9	9	9	9	9	9	26598	46871	27090	39109	6001.4	9	9	9	14775	15243	15563	15217	-	-	439559	58166-27-1	-	-	--
MEDP0006	Glycine	Amino acid and Its metabolomics	Amino acids	76	75.032	[M+H]+	C2H5NO2	732000	788970	990180	670710	806120	913330	732530	829380	524980	705250	694930	655800	42828	66208	40273	29611	434840	383720	331530	408450	C00037	HMDB0000123	750	56-40-6	15428	20	ko00120,ko00230,ko00260,ko00310,ko00440,ko00480,ko00630,ko00730,ko00860,ko00970,ko01100,ko01200,ko01230,ko02010,ko04080,ko04721,ko04974,ko04978,ko05230
MEDP0007	L-Cystine	Amino acid and Its metabolomics	Amino acids	241	240.024	[M+H]+	C6H12N2O4S2	32340	37113	55273	19175	80497	50481	46029	61279	599230	744060	493630	624750	36922	15902	17452	18484	619840	777290	650080	633690	C00491	HMDB0000192	67678	56-89-3	16283	5207	ko00270,ko01100,ko02010,ko04216,ko04974
MEDP0009	L-Tyrosine	Amino acid and Its metabolomics	Amino acids	182.1	181.074	[M+H]+	C9H11NO3	394820	366300	500730	413400	394820	357640	426430	287080	173970	134910	167460	162320	558610	631250	558720	504120	265690	257730	355090	426420	C00082	HMDB0000158	6057	60-18-4	17895	34	ko00130,ko00261,ko00350,ko00360,ko00400,ko00730,ko00970,ko01100,ko01210,ko01230,ko04728,ko04916,ko04917,ko04974,ko05012,ko05030,ko05031,ko05034,ko05230
MEDP0010	L-Arginine	Amino acid and Its metabolomics	Amino acids	175	174.112	[M+H]+	C6H14N4O2	50838000	47895000	50963000	46158000	48733000	55217000	57519000	51991000	794580	853760	381240	682280	276350	351260	759160	556970	9406500	15343000	11985000	12245000	C00062	HMDB0000517	6322	74-79-3	16467	5502	ko00220,ko00261,ko00330,ko00472,ko00970,ko01100,ko01230,ko02010,ko04150,ko04974,ko05014,ko05142,ko05146,ko05230
MEDP0011	L-Lysine	Amino acid and Its metabolomics	Amino acids	147	146.106	[M+H]+	C6H14N2O2	27063000	22742000	29087000	24052000	74167000	67955000	85599000	73049000	13503000	10977000	11194000	9768800	112970000	46640000	59005000	37051000	22691000	31963000	25932000	29254000	C00047	HMDB0000182	5962	56-87-1	18019	5200	ko00300,ko00310,ko00780,ko00970,ko01100,ko01210,ko01230,ko02010,ko04974
MEDP0012	L-Ornithine	Amino acid and Its metabolomics	Amino acids	133	168.067	[M-Cl]+	C5H13ClN2O2	1173700	793910	877120	1138200	942160	1018400	1089100	967250	587940	490370	512730	674570	162090	168670	180210	139960	352700	444890	361600	471860	C00077	HMDB0000214	6262	3184-13-2	15729	27	ko00220,ko00330,ko00472,ko00480,ko01100,ko01210,ko01230,ko02010
MEDP0013	L-Alanine	Amino acid and Its metabolomics	Amino acids	90.048	89.048	[M+H]+	C3H7NO2	33718000	37751000	42999000	33776000	35752000	34891000	30426000	35009000	4624100	5616000	4717900	4712100	2836100	3697800	2704100	1979100	9981900	7878200	8098100	8523900	C00041	HMDB0000161	5950	56-41-7	16977	-	ko00250,ko00270,ko00430,ko00450,ko00970,ko01100,ko01200,ko01230,ko02010,ko04122,ko04974,ko04978,ko05230
MEDP0015	L-Citrulline	Amino acid and Its metabolomics	Amino acids	176.1	175.096	[M+H]+	C6H13N3O3	1739100	1608900	1997100	1639300	1654800	1627900	1670300	1823700	212160	216830	171860	182900	123050	221790	145800	107250	270430	299260	250430	299390	C00327	HMDB0000904	9750	372-75-8	16349	16	ko00220,ko01100,ko01230
MEDP0016	L-Glutamic Acid	Amino acid and Its metabolomics	Amino acids	148.1	147.053	[M+H]+	C5H9NO4	27765000	18786000	23649000	23970000	18027000	27345000	29988000	15403000	4327100	5841300	4966100	5470600	4631200	6627500	4788300	6795100	8604800	8787400	9761500	10192000	C00025	HMDB0000148	33032	56-86-0	16015	5174	ko00220,ko00250,ko00330,ko00340,ko00430,ko00471,ko00480,ko00524,ko00630,ko00650,ko00660,ko00860,ko00910,ko00970,ko01100,ko01200,ko01210,ko01230,ko02010,ko04068,ko04072,ko04080,ko04216,ko04540,ko04713,ko04720,ko04721,ko04723,ko04724,ko04727,ko04730,ko04742,ko04964,ko04974,ko05014,ko05016,ko05017,ko05030,ko05031,ko05033,ko05034,ko05230
MEDP0017	L-Histidine	Amino acid and Its metabolomics	Amino acids	156.1	155.07	[M+H]+	C6H9N3O2	9925400	10765000	11869000	9526000	10000000	9039200	8669100	8991300	16986000	12467000	14588000	13989000	9035300	14517000	10815000	10475000	9693300	9989100	9487300	10353000	C00135	HMDB0000177	6274	71-00-1	15971	21	ko00340,ko00410,ko00970,ko01100,ko01230,ko02010,ko04974,ko05230
MEDP0020	L-Methionine	Amino acid and Its metabolomics	Amino acids	150	149.051	[M+H]+	C5H11NO2S	163110	206310	307960	243190	176730	179450	268510	169180	93946	59031	72049	78535	305930	276600	264830	255160	144540	146230	150890	197460	C00073	HMDB0000696	6137	63-68-3	16643	5664	ko00270,ko00970,ko01100,ko01210,ko01230,ko01523,ko04974,ko04978,ko05230
MEDP0021	L-Phenylalanine	Amino acid and Its metabolomics	Amino acids	166	165.079	[M+H]+	C9H11NO2	97328000	100500000	102400000	94376000	89250000	93875000	95950000	93090000	36641000	47949000	47872000	47309000	96406000	102070000	99073000	102490000	73045000	72964000	75002000	83317000	C00079	HMDB0000159	6140	63-91-2	17295	28	ko00360,ko00400,ko00970,ko01100,ko01210,ko01230,ko02010,ko04974,ko04978,ko05230
MEDP0022	L-Proline	Amino acid and Its metabolomics	Amino acids	116.1	115.063	[M+H]+	C5H9NO2	50159000	47169000	55388000	44979000	35646000	41847000	54041000	40311000	5145200	4760100	3383800	4219700	22895000	27211000	24718000	26344000	18160000	17220000	20051000	21230000	C00148	HMDB0000162	145742	147-85-3	17203	29	ko00330,ko00970,ko01100,ko01230,ko02010,ko04974,ko04978,ko05230
MEDP0024	L-Serine	Amino acid and Its metabolomics	Amino acids	106	105.043	[M+H]+	C3H7NO3	1857900	1730300	2560300	1473300	1090400	1760600	739880	1254600	236350	267900	311010	282580	69725	106550	114840	66082	400530	360820	339580	356880	C00065	HMDB0000187	5951	56-45-1	17115	5203	ko00260,ko00261,ko00270,ko00600,ko00630,ko00920,ko00970,ko01100,ko01200,ko01230,ko02010,ko04071,ko04974,ko04978,ko05230
MEDP0025	L-Tryptophan	Amino acid and Its metabolomics	Amino acids	205.1	204.09	[M+H]+	C11H12N2O2	6040100	4947300	5754100	5670500	53043000	34512000	56351000	66899000	2763200	3029100	4526700	4582500	23202000	28660000	38068000	22075000	12429000	15122000	18024000	31325000	C00078	HMDB0000929	6305	73-22-3	16828	5879	ko00260,ko00380,ko00400,ko00970,ko01100,ko01210,ko01230,ko04361,ko04726,ko04974,ko04978,ko05143,ko05230
MEDP0026	L-Valine	Amino acid and Its metabolomics	Amino acids	118.1	117.079	[M+H]+	C5H11NO2	2591900	2567600	2696300	2696000	2051000	2263200	2374000	2381000	406870	265030	452580	407760	3675200	5324800	3761900	3667100	1562000	1497600	1701200	1753800	C00183	HMDB0000883	6287	72-18-4	16414	5842	ko00280,ko00290,ko00311,ko00770,ko00970,ko01100,ko01210,ko01230,ko02010,ko04974,ko04978,ko05230
MEDP0028	(5-L-Glutamyl)-L-Amino Acid	Amino acid and Its metabolomics	Small Peptide	219	218.09	[M+H]+	C8H14N2O5	110550	222050	131520	267160	100960	195610	184990	165070	1710600	2195500	2352700	2886500	86233	151550	74172	88026	722340	750330	832760	980340	C03740	HMDB0006248	440103	5875-41-2	50619	-	ko00480,ko01100
MEDP0035	5-Hydroxy-L-Tryptophan	Amino acid and Its metabolomics	Amino acid derivatives	221.1	220.085	[M+H]+	C11H12N2O3	75039	76674	83928	76849	114500	84861	102620	101770	9	9	9	9	275830	418400	310510	254480	94422	64130	80440	96892	C00643	HMDB0015571	439280	56-69-9	17780	-	ko00380,ko01100,ko04361,ko04726
MEDP0036	5-Oxoproline	Amino acid and Its metabolomics	Amino acid derivatives	130	129.043	[M+H]+	C5H7NO3	1563400	1294300	2001700	1363400	2570000	1521900	1791100	1642200	452310	410060	407930	480550	10315000	11490000	10875000	8089200	2026500	1826000	2156800	2928800	C02237	HMDB0000805	499	149-87-1	-	-	ko00471,ko01100
MEDP0037	Asp-phe	Amino acid and Its metabolomics	Small Peptide	281.3	280.106	[M+H]+	C13H16N2O5	9	9	9	9	9	9	9	9	172160	109240	137820	105220	108280	132590	114370	115510	69992	105680	74377	67584	-	HMDB0000706	93078	13433-09-5	73830	5674	--
MEDP0039	Betaine	Others	Others	118.1	117.079	[M+H]+	C5H11NO2	1340900	1124800	1361600	1305300	1064300	1212100	1484500	1124100	2545100	2874200	2322100	2438800	12907000	14784000	14447000	15030000	6523000	6345400	7016500	8177100	C00719	HMDB0000043	247	107-43-7	17750	287	ko00260,ko01100,ko02010
MEDP0043	Glutathione Oxidized	Amino acid and Its metabolomics	Small Peptide	613.152	612.152	[M+H]+	C20H32N6O12S2	1166400	1513700	892470	1329300	140950	187240	198060	170300	1027000	53892	212600	204520	1380300	1691600	1037400	731410	678670	712730	726500	1363100	-	-	65359	121-24-4	-	-	--
MEDP0044	Glutathione Reducedform	Amino acid and Its metabolomics	Small Peptide	308	307.084	[M+H]+	C10H17N3O6S	250050	209060	269030	202500	156940	63868	132560	117790	29446000	9239100	12694000	16593000	1097000	1189300	1257200	1382900	6143300	5963600	8097900	7028000	C00051	HMDB0000125	124886	70-18-8	16856	44	ko00270,ko00480,ko01100,ko02010,ko04216,ko04918,ko04976
MEDP0045	Glyc-Pro	Amino acid and Its metabolomics	Small Peptide	173.2	172.085	[M+H]+	C7H12N2O3	29316	45123	32555	23095	54668	26784	26283	55179	93665	82068	141950	87248	7250.8	5449.4	11284	9	74631	59483	54370	64145	-	HMDB0000721	79101	704-15-4	70744	-	--
MEDP0047	Histamine	Alcohol and amines	Polyamines	112.08	111.08	[M+H]+	C5H9N3	135640	144080	131270	92184	76853	121770	108130	66227	1617000	1805500	2616300	1351200	207720	193530	125840	129380	640970	558600	500180	623540	C00388	HMDB0000870	774	51-45-6	18295	68	ko00340,ko01100,ko04080,ko04664,ko04721,ko04750,ko04971,ko04974,ko05310
MEDP0051	L-Cystathionine	Amino acid and Its metabolomics	Amino acid derivatives	223	222.067	[M+H]+	C7H14N2O4S	264640	216190	291190	230450	418300	468280	290460	358780	4991.3	9	9	9	8960.3	11249	9	9	27265	55375	40557	38783	C02291	HMDB0000099	439258	56-88-2	17482	39	ko00260,ko00270,ko01100,ko01230
MEDP0052	L-Cysteine	Amino acid and Its metabolomics	Amino acids	122.02	121.02	[M+H]+	C3H7NO2S	13679000	13735000	16314000	14339000	13596000	16959000	11638000	14185000	11928000	15227000	12226000	12035000	1976000	3409000	1775000	1796200	6719300	6159200	4899000	6983600	C00097	HMDB0000574	5862	52-90-4	17561	5556	ko00260,ko00270,ko00311,ko00430,ko00480,ko00730,ko00770,ko00920,ko00970,ko01100,ko01200,ko01230,ko04122,ko04216,ko04974,ko05230
MEDP0054	L-Glutamine	Amino acid and Its metabolomics	Amino acids	147.069	146.069	[M+H]+	C5H10N2O3	24429000	19015000	26848000	21862000	66876000	63469000	80899000	66775000	12413000	10073000	10781000	9421100	109960000	43968000	51222000	34803000	20140000	27316000	18788000	25872000	C00064	HMDB0000641	5961	56-85-9	18050	5614	ko00220,ko00230,ko00240,ko00250,ko00471,ko00630,ko00750,ko00910,ko00970,ko01100,ko01230,ko02010,ko04724,ko04727,ko04964,ko04974,ko04978,ko05230
MEDP0055	L-Homocitrulline	Amino acid and Its metabolomics	Amino acids	190.1	189.111	[M+H]+	C7H15N3O3	451770	341870	276210	506170	255820	438200	407280	288220	437540	382370	227420	278740	615890	1126100	892260	942350	370190	446950	414720	385190	C02427	HMDB0000679	65072	1190-49-4	17443	46	--
MEDP0056	L-Homocystine	Amino acid and Its metabolomics	Amino acids	269	268.055	[M+H]+	C8H16N2O4S2	111510	139340	188680	155440	131950	162470	166200	144850	9	9	9	9	191880	224950	197480	248490	78816	43551	40390	59638	C01817	HMDB0000676	69382	626-72-2	89698	-	ko00270
MEDP0058	L-Saccharopine	Amino acid and Its metabolomics	Amino acids	277	276.132	[M+H]+	C11H20N2O6	5669000	6314100	6015900	5506600	4773800	6529900	6011200	4542200	2004500	2505900	2296200	3532400	604630	917180	778670	665420	1607100	1848600	1578700	1908500	C00449	HMDB0000279	160556	997-68-2	16927	383	ko00300,ko00310,ko01100,ko01230
MEDP0061	N,N-Dimethylglycine	Amino acid and Its metabolomics	Amino acid derivatives	104	103.063	[M+H]+	C4H9NO2	7603100	6444800	6773500	6786100	6029300	8232900	7468500	6102400	4672500	6383500	4384200	5152100	3273000	3144500	2888600	2949600	4540900	4449300	4638800	4804400	C01026	HMDB0000092	673	1118-68-9	17724	277	ko00260,ko01100
MEDP0062	N6-Acetyl-L-Lysine	Amino acid and Its metabolomics	Amino acid derivatives	189.116	188.116	[M+H]+	C8H16N2O3	562050	554900	433390	480320	396570	589010	521500	493060	3898500	3233700	2721900	3771400	2644900	2451800	2789300	2308600	1670500	2108900	1673500	2059800	C02727	HMDB0000206	92832	692-04-6	17752	5216	ko00310,ko01100
MEDP0064	N-Acetylcysteine	Amino acid and Its metabolomics	Amino acid derivatives	164	163.03	[M+H]+	C5H9NO3S	428670	458280	418730	369190	333500	396830	333150	318950	343900	388490	367390	352450	303460	306730	275220	275060	425270	303940	296900	406260	C06809	HMDB0001890	12035	616-91-1	28939	784	--
MEDP0065	N-Acetyl-L-Glutamic Acid	Amino acid and Its metabolomics	Amino acid derivatives	190.1	189.064	[M+H]+	C7H11NO5	405020	356500	483860	317980	490320	446170	458670	464000	2143600	2056400	1712200	2462500	4140300	6054600	5764000	6021900	2248800	2660000	3253900	3922100	C00624	HMDB0001138	185	1188-37-0	17533	-	ko00220,ko01100,ko01210,ko01230
MEDP0066	N-Acetyl-L-Tyrosine	Amino acid and Its metabolomics	Amino acid derivatives	224.1	223.085	[M+H]+	C11H13NO4	129710	137530	117230	140590	119850	136900	129190	133770	454130	515360	682090	408170	644730	538570	568220	352580	344360	330920	322980	292400	C01657	HMDB0000866	68310	537-55-3	21563	-	--
MEDP0071	Gly-Leu	Amino acid and Its metabolomics	Amino acid derivatives	189.1	188.116	[M+H]+	C8H16N2O3	14742000	15031000	13394000	14864000	16606000	13198000	17101000	18191000	567420	321960	202830	409700	30429	72401	50849	57912	3329400	4655500	4454300	4381100	C02155	HMDB0000759	92843	869-19-2	73514	5727	--
MEDP0075	Nα-Acetyl-L-Arginine	Amino acid and Its metabolomics	Amino acid derivatives	217.1	216.122	[M+H]+	C8H16N4O3	233510	242650	244200	222230	227740	198470	189010	234210	219700	231860	241730	208680	229360	208600	210920	184110	194770	252790	208590	209620	-	HMDB0004620	67427	155-84-0	40521	-	--
MEDP0078	Phe-Phe	Amino acid and Its metabolomics	Small Peptide	313.4	312.147	[M+H]+	C18H20N2O3	80448	74049	76006	77714	70181	41931	85075	85303	10418	5368.1	5623.7	3964.1	59308	124990	55402	64545	33323	39203	39766	43585	-	HMDB0013302	65104	2577-40-4	356630	-	--
MEDP0079	S-(5-Adenosy)-L-Homocysteine	Amino acid and Its metabolomics	Amino acid derivatives	385	384.122	[M+H]+	C14H20N6O5S	255150	238280	199420	320840	264820	217890	265620	278710	18579	15802	10095	19469	18476	21136	39367	22908	108590	89658	80133	109530	C00021	HMDB0000939	439155	979-92-0	16680	296	ko00270,ko01100,ko01230
MEDP0081	Serotonin	Tryptamines,Cholines,Pigments	Tryptamines	177	176.095	[M+H]+	C10H12N2O	282290	253190	197560	287190	183730	174500	224090	403090	9	9	9	9	146890	175850	169760	112370	69943	118940	80555	151450	C00780	HMDB0000259	5202	50-67-9	-	-	ko00380,ko01100,ko04024,ko04080,ko04361,ko04540,ko04721,ko04726,ko04742,ko04750,ko04976
MEDP0082	S-Sulfo-L-Cysteine	Amino acid and Its metabolomics	Amino acid derivatives	202.2	200.977	[M+H]+	C3H7NO5S2	1078900	652210	608580	815600	373300	788510	831040	513480	6552.3	24026	61718	49903	106100	40446	60790	49229	163620	122350	93614	277090	C05824	HMDB0000731	115015	1637-71-4	27891	-	ko00270,ko01100,ko01230
MEDP0083	Trans-4-Hydroxy-L-Proline	Amino acid and Its metabolomics	Amino acid derivatives	132.058	131.058	[M+H]+	C5H9NO3	293940	267990	303460	296470	226950	292970	217040	243170	13685000	13698000	11413000	12685000	37086	9	9	9	4431100	4285400	3923600	3779500	C01157	HMDB0000725	5810	51-35-4	18095	257	ko00330,ko01100,ko02010
MEDP0084	Trimethylamine N-Oxide	Alcohol and amines	Amines	76	75.0684	[M+H]+	C3H9NO	139160	133190	143220	123810	152010	172510	78687	111370	144670	214180	145180	149840	26984	22475	23764	12672	65782	55585	58220	78803	C01104	HMDB0000925	1145	1184-78-7	15724	5876	ko01100
MEDP0085	Tyramine	Benzene and substituted derivatives	Benzene and substituted derivatives	138.084	137.084	[M+H]+	C8H11NO	26185000	21962000	28168000	24396000	28153000	19056000	25475000	25329000	9	9	9	9	58136000	67396000	66751000	72501000	18973000	18377000	22199000	23711000	C00483	HMDB0000306	5610	51-67-2	15760	60	ko00350,ko01100,ko04080,ko04974
MEDP0086	Urea	Alcohol and amines	Amines	61	60.032	[M+H]+	CH4N2O	151760	170870	187030	180140	115820	114330	169090	137280	177570	194640	108770	177520	367580	382570	349060	348600	283920	211090	250480	291930	C00086	HMDB0000294	1176	57-13-6	16199	6	ko00220,ko00230,ko00240,ko00330,ko00780,ko01100,ko02010,ko05120
MEDP0101	P-Coumaric Acid	Benzene and substituted derivatives	Phenolic acids	165.047	164.047	[M+H]+	C9H8O3	3523500	3340500	4384200	3171400	4198000	2470000	2868300	2961500	1710600	1358600	1430000	1701200	3288200	5406600	4184500	5407300	3137000	3245900	2989000	3867600	C00811	HMDB0002035	637542	501-98-4	32374	6450	ko00130,ko00350,ko01100
MEDP0114	Phthalic Acid	Benzene and substituted derivatives	Phenolic acids	167.027	166.027	[M+H]+	C8H6O4	132060	139400	141820	115750	147240	84969	160240	119210	19192	9	13400	11697	116500	128780	134650	106500	62515	67708	64334	83727	C01606	HMDB0002107	1017	88-99-3	29069	6489	ko01100,ko02010
MEDP0115	1,4-Dihydro-1-Methyl-4-Oxo-3-Pyridinecarboxamide	Heterocyclic compounds	Pteridines and derivatives	153.06	152.059	[M+H]+	C7H8N2O2	2941600	887650	4050900	1193700	8255200	3158400	5166400	4448300	5432000	7371900	5324300	9343100	8641400	27633000	10268000	20021000	6407700	8498800	15062000	19487000	C05843	HMDB0004194	440810	769-49-3	27838	-	ko00760,ko01100
MEDP0119	6-Hydroxynicotinic Acid	CoEnzyme and vitamins	CoEnzyme and vitamins	140	139.027	[M+H]+	C6H5NO3	40320	41944	14047	27886	35895	21697	24349	36721	9	9233.5	18753	10000	72019	59645	71845	45876	24176	26441	24120	30127	C01020	HMDB0002658	72924	5006-66-6	16168	-	ko00760,ko01100
MEDP0120	Theobromine	Nucleotide And Its metabolomics	Nucleotide and Its metabolomics	181	180.065	[M+H]+	C7H8N4O2	25727	27604	15422	19197	94644	50235	78654	62601	18316	12052	16444	5188.1	39677	45836	41939	31110	30107	31323	19671	19546	C07480	HMDB0002825	5429	83-67-0	28946	1456	ko00232,ko01100
MEDP0125	Choline	Tryptamines,Cholines,Pigments	Cholines	105.11	104.108	[M+H]+	C5H14NO+	352050	313760	363990	307600	275130	362640	370060	339950	277300	381140	223500	292500	202960	98748	137540	137930	194360	247780	134320	255660	C00114	HMDB0000097	305	62-49-7	15354	56	ko00260,ko00564,ko01100,ko02010,ko04725,ko04976,ko05231
MEDP0126	1,5-Diaminopentane	Alcohol and amines	Polyamines	103	102.116	[M+H]+	C5H14N2	1076400	1374200	1224300	1276100	1165800	1241700	1166500	918300	3277100	4181300	4325500	4837400	1478100	2045900	1727300	1703200	2021900	2519800	2202200	2603200	C01672	HMDB0002322	273	462-94-2	18127	3236	ko00310,ko00480,ko01100,ko04974
MEDP0127	Putrescine	Alcohol and amines	Polyamines	89	88.1	[M+H]+	C4H12N2	9	9	9	9	9	9	9	9	17994000	20841000	18511000	19640000	2442100	2319800	2257000	2366400	9562700	10824000	10064000	12177000	C00134	HMDB0001414	1045	110-60-1	17148	3226	ko00330,ko00472,ko00480,ko01100,ko02010,ko04974
MEDP0136	Protocatechuic Acid	Benzene and substituted derivatives	Phenolics	155	154.027	[M+H]+	C7H6O4	44603	34031	43216	55416	31190	32130	48065	41920	9	9	9	9	57256	48131	47234	46267	25307	16477	23612	14423	C00230	HMDB0001856	72	99-50-3	36062	6350	ko01100
MEDP0143	Biotin	CoEnzyme and vitamins	CoEnzyme and vitamins	245.09	244.088	[M+H]+	C10H16N2O3S	1720400	2061000	1977300	1827700	2201800	1879800	1945900	2082700	101140	100680	85886	80671	1941800	2049900	2352300	1585400	859510	1074300	880960	1094700	C00120	HMDB0000030	171548	58-85-5	15956	243	ko00780,ko01100,ko02010,ko04977
MEDP0146	1-Methyladenine	Nucleotide And Its metabolomics	Nucleotide and Its metabolomics	150.3	149.07	[M+H]+	C6H7N5	620550	650040	710860	779560	538860	640470	716920	704570	231570	231380	205340	273980	1057700	1331100	1018700	1222800	471160	552010	493810	574060	C02216	HMDB0011599	78821	5142-22-3	18083	-	--
MEDP0148	1-Methylxanthine	Nucleotide And Its metabolomics	Nucleotide and Its metabolomics	167.1	166.049	[M+H]+	C6H6N4O2	27662	16469	8867.6	13208	9	9	9	9	147390	207690	180960	165040	96953	138320	116130	127910	148570	81817	128820	173420	-	HMDB0010738	80220	6136-37-4	68444	-	--
MEDP0149	2'-Deoxyadenosine-5'-Monophosphate	Nucleotide And Its metabolomics	Nucleotide and Its metabolomics	332	331.068	[M+H]+	C10H14N5O6P	148330	269160	56692	174850	19982	83636	31971	60731	6291200	4766300	4558000	6099400	1857100	2369800	3203400	1403600	2876500	2996700	3029900	2928700	C00360	HMDB0000905	12599	653-63-4	17713	3461	ko00230,ko01100
MEDP0150	2'-Deoxyinosine	Nucleotide And Its metabolomics	Nucleotide and Its metabolomics	253.1	252.086	[M+H]+	C10H12N4O4	736010	978570	477290	708120	154860	193170	136860	236200	2418500	1934800	1035800	1253700	707870	1114300	927840	581470	737260	1046800	996170	954410	C05512	HMDB0000071	65058	890-38-0	28997	3383	ko00230,ko01100,ko02010
MEDP0151	2-Hydroxy-6-Aminopurine	Nucleotide And Its metabolomics	Nucleotide and Its metabolomics	152.1	151.049	[M+H]+	C5H5N5O	3355900	3108600	2793300	2976100	3001700	2740700	3299600	3469300	1464200	837330	1192800	1198000	4573200	5234200	5054900	4118800	2390200	2322600	2388200	2581100	-	HMDB0000403	76900	3373-53-3	62462	5392	--
MEDP0152	3'-Aenylic Acid	Nucleotide And Its metabolomics	Nucleotide and Its metabolomics	348	347.063	[M+H]+	C10H14N5O7P	10618000	16444000	6594200	14893000	1753300	1659400	1290900	1616800	25655000	22296000	26615000	28526000	12435000	10120000	13947000	10922000	10342000	11847000	10163000	14638000	C01367	HMDB0003540	41211	84-21-9	28931	-	ko00230,ko01100
MEDP0155	5-Methylcytosine	Nucleotide And Its metabolomics	Nucleotide and Its metabolomics	126.1	125.059	[M+H]+	C5H7N3O	32989	42390	30482	22435	13815	22417	11045	17318	9	11577	6412.9	8333	17746	20803	18218	12266	8486.4	11193	9034.6	9657.5	C02376	HMDB0002894	65040	554-01-8	27551	3247	ko00240,ko01100
MEDP0156	5-Methyluridine	Nucleotide And Its metabolomics	Nucleotide and Its metabolomics	259.085	258.085	[M+H]+	C10H14N2O6	9	9	9	9	9	9	9	9	237200	164640	177530	103330	556890	1192800	364330	401490	360670	259810	289280	334360	-	HMDB0000884	445408	1463-10-1	45996	5843	--
MEDP0158	8-Hydroxyguanosine	Nucleotide And Its metabolomics	Nucleotide and Its metabolomics	300.1	299.087	[M+H]+	C10H13N5O6	1168200	1304700	774970	1086400	254820	307470	282610	214660	213720	93922	126980	121820	274460	233980	310530	230000	305520	292810	256800	139020	-	HMDB0002044	65131	3868-31-3	1177182	-	--
MEDP0159	Adenine	Nucleotide And Its metabolomics	Nucleotide and Its metabolomics	136.1	135.055	[M+H]+	C5H5N5	1865300	2286600	1838900	1994200	668380	985340	918310	677920	14445000	10427000	10786000	9511100	8052100	9829100	8210700	6386700	6356300	5628300	7337800	8657500	C00147	HMDB0000034	190	73-24-5	16708	85	ko00230,ko01100
MEDP0160	Adenosine	Nucleotide And Its metabolomics	Nucleotide and Its metabolomics	268.097	267.097	[M+H]+	C10H13N5O4	91560000	100310000	74994000	86531000	23624000	29364000	28802000	32567000	76117000	49918000	65485000	56317000	109090000	150070000	115810000	90603000	79210000	71208000	70658000	71522000	C00212	HMDB0000050	60961	58-61-7	16335	86	ko00230,ko01100,ko02010,ko04022,ko04024,ko04071,ko04080,ko04270,ko04923,ko04924,ko05012,ko05032,ko05034
MEDP0161	Adenosine 5'-Diphosphate	Nucleotide And Its metabolomics	Nucleotide and Its metabolomics	428	427.029	[M+H]+	C10H15N5O10P2	165710	210720	153240	154830	31228	71958	66689	48365	3813000	3064200	2017700	3400000	1088400	1707200	1802100	1283500	2284100	2000600	2785200	2994800	C00008	HMDB0001341	6022	58-64-0	16761	6175	ko00190,ko00230,ko01100,ko04068,ko04080,ko04142,ko04152,ko04611,ko04714,ko04742,ko04924,ko05012,ko05014
MEDP0163	Cytidine	Nucleotide And Its metabolomics	Nucleotide and Its metabolomics	244.086	243.086	[M+H]+	C9H13N3O5	233880	265010	138920	213440	75778	81272	70377	105540	3008300	921280	492520	1292100	1913100	2862100	1430700	1462400	820250	1018000	965520	858140	C00475	HMDB0000089	6175	65-46-3	17562	3376	ko00240,ko01100,ko02010
MEDP0164	Cytidine-5-Monophosphate	Nucleotide And Its metabolomics	Nucleotide and Its metabolomics	324	323.052	[M+H]+	C9H14N3O8P	7560200	8574400	4695200	7241600	564710	1014000	736270	653310	4426000	4201100	1794200	3065200	838740	815560	663700	766740	1443000	1743300	1600400	1673700	C00055	HMDB0000095	6131	63-37-6	17361	5143	ko00240,ko01100
MEDP0165	Cytosine	Nucleotide And Its metabolomics	Nucleotide and Its metabolomics	112	111.043	[M+H]+	C4H5N3O	9	9	9	9	9	9	9	9	583420	257890	292410	373920	487000	957150	694320	603050	285690	258580	324470	304710	C00380	HMDB0000630	597	71-30-7	16040	283	ko00240,ko01100
MEDP0167	Guanosine	Nucleotide And Its metabolomics	Nucleotide and Its metabolomics	284.092	283.092	[M+H]+	C10H13N5O5	78712000	82583000	51908000	68331000	16327000	18192000	18184000	22014000	17603000	7190300	15065000	10653000	25696000	45493000	34728000	28927000	30179000	25474000	29020000	27328000	C00387	HMDB0000133	6802	118-00-3	16750	87	ko00230,ko01100,ko02010
MEDP0168	Guanosine 3',5'-Cyclic Monophosphate	Nucleotide And Its metabolomics	Nucleotide and Its metabolomics	346.2	345.047	[M+H]+	C10H12N5O7P	3986000	2995100	4603300	4501400	16048000	13355000	16344000	18156000	321540	663740	394040	268010	278370	305780	544420	243460	3231400	3216200	3247500	3664600	C00942	HMDB0001314	24316	7665-99-8	16356	6152	ko00230,ko01100,ko04022,ko04270,ko04540,ko04611,ko04713,ko04714,ko04730,ko04740,ko04744,ko04921,ko04923,ko04924,ko04925,ko04970,ko04976
MEDP0169	Guanosine-5'-monophosphate	Nucleotide And Its metabolomics	Nucleotide and Its metabolomics	364	363.058	[M+H]+	C10H14N5O8P	1438900	2163900	1081900	1387300	198800	185260	165760	192580	1153000	809280	809750	867980	75461	77135	72808	58933	555810	576980	574670	931000	C00144	HMDB0001397	135398631	85-32-5	17345	6216	ko00230,ko01100,ko01523,ko04022,ko04740,ko04742,ko04744
MEDP0170	Hypoxanthine	Nucleotide And Its metabolomics	Nucleotide and Its metabolomics	137	136.039	[M+H]+	C5H4N4O	9	9	9	9	1416700	1160700	1458600	1189900	2445000	3292800	3079600	3998700	2607900	2420100	2917900	3180400	2650200	2450600	3285700	3329000	C00262	HMDB0000157	790	68-94-0	17368	83	ko00230,ko01100
MEDP0171	Inosine	Nucleotide And Its metabolomics	Nucleotide and Its metabolomics	269.08	268.081	[M+H]+	C10H12N4O5	23167000	27714000	17996000	21877000	5554000	6806000	6315700	7751000	16068000	10862000	13565000	15006000	28047000	45413000	32681000	24664000	19101000	18612000	16319000	16754000	C00294	HMDB0000195	135398641	58-63-9	17596	84	ko00230,ko01100,ko02010
MEDP0173	Nicotinic Acid Adenine Dinucleotide	Nucleotide And Its metabolomics	Nucleotide and Its metabolomics	664.11	663.109	[M+H]+	C21H27N7O14P2	796280	941670	591140	710530	215120	154430	186650	189060	34382000	22891000	26367000	28277000	13931000	19959000	18123000	13453000	19648000	18101000	18073000	23522000	C00003	HMDB0000902	5893	53-84-9	15846	5858	ko00190,ko00730,ko00760,ko00983,ko01100,ko04152,ko04211,ko04212,ko04925,ko04977
MEDP0174	Purine	Nucleotide And Its metabolomics	Nucleotide and Its metabolomics	121	120.044	[M+H]+	C5H4N4	1630000	1616000	1649600	1772500	1652100	1625000	1644800	1729500	867920	667390	537760	839190	1740400	2107900	1725700	1758400	984440	1131200	1306700	1273700	C15587	HMDB0001366	1044	120-73-0	17258	6193	--
MEDP0177	Thymine	Nucleotide And Its metabolomics	Nucleotide and Its metabolomics	127	126.043	[M+H]+	C5H6N2O2	315140	528320	279960	404500	237700	174010	180420	238460	8697200	7864500	11347000	11483000	16903000	17514000	17237000	15551000	18731000	17145000	15891000	17448000	C00178	HMDB0000262	1135	65-71-4	-	-	ko00240,ko01100
MEDP0178	Uracil	Nucleotide And Its metabolomics	Nucleotide and Its metabolomics	113.027	112.027	[M+H]+	C4H4N2O2	455550	559980	417340	363940	294550	195450	242950	220960	3075400	2565400	2857800	2888200	2283200	2719300	2412300	2415100	1697600	1842500	2190700	2402400	C00106	HMDB0000300	1174	66-22-8	17568	258	ko00240,ko00410,ko00770,ko01100
MEDP0180	Β-Nicotinamide Mononucleotide	Nucleotide And Its metabolomics	Nucleotide and Its metabolomics	335.1	334.057	[M+H]+	C11H15N2O8P	35310	36254	24291	23944	17720	53890	46605	34249	7159000	12522000	4693700	5435600	536480	244110	336690	295150	1184300	1491500	1350600	1276700	C00455	HMDB0000229	14180	1094-61-7	16171	5238	ko00760,ko01100
MEDP0209	Cis-Aconitic Acid	Organic acid And Its derivatives	Organic acid And Its derivatives	175.016	174.016	[M+H]+	C6H6O6	63697	73447	58777	77835	57125	74533	55192	85228	51477	62804	63175	41199	50464	54236	61059	59819	68267	51917	54269	54898	C00417	HMDB0000072	643757	585-84-2	32805	5130	ko00020,ko00630,ko00660,ko01100,ko01210
MEDP0212	N-Acetyl-5-Hydroxytryptamine	Tryptamines,Cholines,Pigments	Tryptamines	219	218.106	[M+H]+	C12H14N2O2	9	9	9	9	9	9	9	9	643540	504490	557650	482370	735870	768040	801100	706600	357950	408550	540630	507760	C00978	HMDB0001238	903	1210-83-9	17697	366	ko00380,ko01100
MEDP0218	D-Mannitol	Carboxylic acids and derivatives	Sugar alcohols	183.08	182.079	[M+H]+	C6H14O6	14246	11022	16484	11178	7867.3	12548	24193	17099	1587800	1814800	827700	2419200	21647	17720	10235	13696	424730	718710	535860	601240	C00392	HMDB0000765	6251	69-65-8	16899	142	ko00051,ko01100,ko02010
MEDP0224	D-Fructose	Carboxylic acids and derivatives	Sugars	181	180.063	[M+H]+	C6H12O6	781520	848180	982710	612560	590840	562050	550960	324850	3259000	4748600	3875900	2937900	1520500	1718200	2172300	1701100	2403000	2970500	2329000	2833700	C10906	HMDB0062538	5984	57-48-7	48095	-	--
MEDP0229	Lactose	Carboxylic acids and derivatives	Sugars	365.106	342.116	[M+Na]+	C12H22O11	153480	134700	136440	208120	2820900	2089000	3532900	1993400	1490400	655060	1014000	944030	221050	9	286830	171640	540670	397750	534820	729420	C00243	HMDB0000186	84571	63-42-3	36219	267	ko00052,ko01100,ko02010,ko04973
MEDP0234	D-Glucono-1,5-Lactone	Carboxylic acids and derivatives	Sugar acids	179.048	178.048	[M+H]+	C6H10O6	290410	310930	301290	215340	277620	221430	240240	273770	162930	184750	285620	242050	290580	206300	274290	241570	328490	219130	124800	359080	C00198	HMDB0000150	7027	90-80-2	16217	353	ko00030,ko01100,ko01200
MEDP0240	Pyridoxine	CoEnzyme and vitamins	CoEnzyme and vitamins	170.1	169.074	[M+H]+	C8H11NO3	499550	424720	447880	405020	705310	373960	575700	553270	2098000	1756400	1597000	1569900	1038900	1292000	612620	1411100	897100	1113400	1066800	1267300	C00314	HMDB0000239	1054	65-23-6	-	-	ko00750,ko01100
MEDP0242	Nicotinamide	CoEnzyme and vitamins	CoEnzyme and vitamins	123.1	122.1	[M+H]+	C6H6N2O	40181000	55667000	29084000	41684000	12838000	13659000	12315000	13786000	412720	849230	872440	831930	107110	205990	97976	178070	2889400	2782400	2583800	1642100	C00153	HMDB0001406	936	98-92-0	17154	1497	ko00760,ko01100,ko04212,ko04977
MEDP0246	Nicotinic Acid	CoEnzyme and vitamins	CoEnzyme and vitamins	124	123.032	[M+H]+	C6H5NO2	3746900	4323400	3855100	4198000	2634500	3333300	3140500	3593100	7168100	6988200	12261000	11472000	27376000	38001000	31078000	18797000	16424000	11363000	12065000	16295000	C00253	HMDB0001488	938	59-67-6	15940	6272	ko00760,ko01100,ko05133
MEDP0250	Riboflavin	CoEnzyme and vitamins	CoEnzyme and vitamins	377	376.138	[M+H]+	C17H20N4O6	11642000	11529000	6920800	12478000	5415200	5641500	6468100	5582900	10724000	12952000	10677000	12914000	11523000	14020000	12039000	11532000	14128000	15915000	13968000	19298000	C00255	HMDB0000244	493570	83-88-5	-	-	ko00740,ko01100,ko02010,ko04977
MEDP0251	Trigonelline	CoEnzyme and vitamins	CoEnzyme and vitamins	138	137.048	[M+H]+	C7H7NO2	158970	159290	86258	152180	160810	212810	171280	113540	83494	86815	57585	126400	196550	222150	235590	186980	116470	111350	132420	180540	C01004	HMDB0000875	5570	535-83-1	18123	273	ko00760
MEDP0270	3-Indolebutyric Acid	Heterocyclic compounds	Indole and Its derivatives	204.1	203.095	[M+H]+	C12H13NO2	6337700	6380500	6525400	6586000	6583100	6702000	7523400	7022200	6235000	6243600	7081200	6244300	5821800	6051300	6280900	5496000	6682500	6041200	5979000	4942600	C11284	HMDB0002096	8617	133-32-4	33070	6485	--
MEDP0275	Indole-3-Acetic Acid	Heterocyclic compounds	Indole and Its derivatives	176.1	175.063	[M+H]+	C10H9NO2	1135900	1065500	1207300	915690	6150000	4751300	5932800	5067600	464670	462220	678900	377260	2375200	2269700	2756200	1923200	1548700	1761300	1199100	1015100	C00954	HMDB0000197	802	87-51-4	16411	5211	ko00380,ko01100
MEDP0281	1,3-Diaminopropane	Alcohol and amines	Amines	75	74.084	[M+H]+	C3H10N2	31735	32864	30985	33506	29860	36002	27884	27017	93844	90403	99674	75317	166250	186830	191510	196130	74139	69965	81419	87885	C00986	HMDB0000002	428	109-76-2	15725	5081	ko00260,ko00330,ko00410,ko01100
MEDP0282	1,3-Dimethyluric Acid	Amino acid and Its metabolomics	Amino acid derivatives	197	196.06	[M+H]+	C7H8N4O3	83092	92899	86042	81230	92598	103840	147380	109510	9	9	9	9	119350	123980	115160	92682	45938	45255	52134	62794	-	HMDB0001857	70346	944-73-0	68447	2822	--
MEDP0295	4-Acetamidobutyric Acid	Organic acid And Its derivatives	Organic acid And Its derivatives	146.074	145.074	[M+H]+	C6H11NO3	176910	212120	210040	249860	185040	201780	173590	167470	245560	851860	840770	510640	2132400	2418800	2102900	1895700	856480	770780	677310	860280	C02946	HMDB0003681	18189	3025-96-5	17645	-	ko00330,ko01100
MEDP0296	4-Guanidinobutyric Acid	Organic acid And Its derivatives	Organic acid And Its derivatives	146.085	145.085	[M+H]+	C5H11N3O2	273450	190990	226050	247900	153910	157530	179770	85798	1639200	1718300	1006900	1447600	1288500	2020400	1628200	1477400	729980	979680	778000	759050	C01035	HMDB0003464	500	463-00-3	15728	6938	ko00330,ko01100
MEDP0297	5-Aminovaleric Acid	Amino acid and Its metabolomics	Amino acid derivatives	118.2	117.079	[M+H]+	C5H11NO2	21340	15316	22737	12702	13509	16422	15353	12149	231850	231990	185840	228070	1007600	1619100	2249200	1848900	501310	652810	645390	795050	C00431	HMDB0003355	138	660-88-8	15887	6902	ko00310,ko00330,ko01100
MEDP0298	6-Aminocaproic Acid	Amino acid and Its metabolomics	Amino acid derivatives	132.095	131.095	[M+H]+	C6H13NO2	2021600	2055200	2461800	2169800	2070100	1965600	2267300	2020900	436850	374000	496770	423280	2447900	3042200	2541400	2248200	1290400	1250400	1453000	1632800	C02378	HMDB0001901	564	60-32-2	16586	-	ko01100
MEDP0305	Creatinine	Organic acid And Its derivatives	Organic acid And Its derivatives	114.059	113.059	[M+H]+	C4H7N3O	72318	154370	111140	77151	95062	84667	68420	128230	87355	81493	121380	75704	89912	122710	82483	59487	122550	74658	68856	78871	C00791	HMDB0000562	588	60-27-5	16737	8	ko00330,ko01100
MEDP0307	Dl-2-Aminooctanoic Acid	Organic acid And Its derivatives	Organic acid And Its derivatives	160.126	159.126	[M+H]+	C8H17NO2	9	9	9	9	13389	9	9	9	52081	40595	31932	51227	55642	89891	54853	49678	29594	43451	46773	54183	-	HMDB0000991	69522	644-90-6	75145	5923	--
MEDP0308	Dodecanedioic Aicd	FA	FFA	231.152	230.152	[M+H]+	C12H22O4	10599	12831	14628	6211.1	14671	12418	16717	9256.6	16690	23947	28182	17220	21039	14114	22918	11658	20925	18796	31028	23579	C02678	HMDB0000623	12736	693-23-2	4676	5596	--
MEDP0313	Guanidineacetic Acid	Organic acid And Its derivatives	Organic acid And Its derivatives	118.1	117.054	[M+H]+	C3H7N3O2	24786	15065	20210	9755.8	17864	20060	19464	13432	253280	265100	219510	152030	913080	1683200	2251800	2120800	558880	742540	692400	882650	C00581	HMDB0000128	763	352-97-6	16344	5163	ko00260,ko00330,ko01100
MEDP0315	Hippuric Acid	Organic acid And Its derivatives	Organic acid And Its derivatives	180.1	179.058	[M+H]+	C9H9NO3	110530	133180	115930	138110	142930	103190	125940	132110	14124	16246	15193	15158	82682	100890	72470	74409	72603	63132	45588	70462	C01586	HMDB0000714	464	495-69-2	18089	1301	ko00360,ko01100
MEDP0318	Kinurenine	Amino acid and Its metabolomics	Amino acid derivatives	209.1	208.085	[M+H]+	C10H12N2O3	91798	80242	71866	82577	79345	83035	102040	74172	9	9	9	9	373690	343200	399870	321070	59177	62361	92276	109750	C00328	HMDB0000684	161166	343-65-7	16946	72	ko00380,ko01100,ko05143
MEDP0321	L-Dihydroorotic Acid	Organic acid And Its derivatives	Organic acid And Its derivatives	159	158.033	[M+H]+	C5H6N2O4	8876100	11710000	11395000	8860400	11182000	7670100	10060000	12600000	8714900	8751900	7693500	9451700	11795000	12806000	9490400	8167900	7584500	8713200	9785100	11238000	C00337	HMDB0003349	439216	5988-19-2	17025	6899	ko00240,ko01100
MEDP0322	L-Homoserine	Organic acid And Its derivatives	Organic acid And Its derivatives	120.065	119.058	[M+H]+	C4H9NO3	824100	722770	886090	796420	468160	782890	481570	547800	93580	125290	110670	89044	98978	144770	23325	34615	223770	174800	185840	207130	C00263	HMDB0000719	12647	672-15-1	15699	5687	ko00260,ko00270,ko00300,ko00920,ko01100,ko01230
MEDP0325	Maleic Acid	Organic acid And Its derivatives	Organic acid And Its derivatives	117.011	116.011	[M+H]+	C4H4O4	3693000	3128500	2814800	3294900	2467600	3327300	2794700	2517200	314820	212000	239740	271260	1298300	1445400	1318300	1162600	836970	1214600	1256300	1170800	C01384	HMDB0000176	444266	110-16-7	18300	-	ko00350,ko00650,ko00760,ko01100
MEDP0326	N'-Formylkynurenine	Amino acid and Its metabolomics	Amino acid derivatives	237.1	236.08	[M+H]+	C11H12N2O4	13906	31541	37376	26034	113300	99694	148950	95235	128980	132000	108320	181960	2609700	2712200	2586700	2254400	379550	452290	486920	511880	C02406	HMDB0001200	910	1022-31-7	18377	-	--
MEDP0336	LPC(0:0/14:0)	GP	LPC	468.3	467.301	[M+H]+	C22H46NO7P	447000	344260	405650	587750	1407500	1220100	1349600	1247300	17691	2423.8	7489.5	6582.1	5868.5	7244	2663.1	4635.8	376330	314800	368510	349790	-	HMDB0010379	460604	20559-16-4	64489	-	--
MEDP0338	LPC(16:0/0:0)	GP	LPC	496.33	495.332	[M+H]+	C24H50NO7P	6917600	6449000	5642700	7864400	16044000	13163000	19090000	15863000	1993500	1220800	1283100	1302900	96960	141940	147480	101650	4430100	4675000	4336800	4723800	-	HMDB0010382	460602	17364-16-8	72998	-	--
MEDP0362	Neopterin	Heterocyclic compounds	Pteridines and derivatives	254.08	253.081	[M+H]+	C9H11N5O4	18901	27402	6509.7	25890	9	9	9	3479.6	824280	774780	813110	762920	9	9	4838	11303	247130	279100	242720	234250	C05926	HMDB0000845	4455	2009-64-5	-	248	ko00790
MEDP0367	γ-Aminobutyric Acid	Amino acid and Its metabolomics	Amino acid derivatives	104.06	103.063	[M+H]+	C4H9NO2	335120	317860	332480	338250	158750	190570	192060	126110	29980000	29601000	25079000	23991000	396800	165070	713670	1020300	12368000	15096000	13431000	16771000	C00334	HMDB0000112	119	56-12-2	16865	-	ko00250,ko00330,ko00410,ko00650,ko00760,ko01100,ko04024,ko04080,ko04721,ko04723,ko04727,ko04742,ko04915,ko04929,ko05032,ko05033
MEDP0369	4-(Aminomethyl)-5-(Hydroxymethyl)-2-Methylpyridin-3-Ol	Heterocyclic compounds	Pteridines and derivatives	169.09	168.09	[M+H]+	C8H12N2O2	396280	336970	311160	387670	131830	224520	240280	141440	67537	68677	39341	43976	313870	166390	212380	289580	131620	145470	162480	257640	C00534	HMDB0001431	1052	85-87-0	16410	238	ko00750,ko01100,ko04977
MEDP0371	Acetaminophen Glucuronide	Alcohol and amines	Amines	328.1	327.095	[M+H]+	C14H17NO8	25469	8398.5	22239	4703.1	27753	12014	22153	24146	100370	84761	87708	93006	26788	55671	43324	26596	89394	86233	82398	91543	-	HMDB0010316	83944	16110-10-4	32636	-	--
MEDP0373	N-Acetylglycine	Amino acid and Its metabolomics	Amino acid derivatives	118	117.043	[M+H]+	C4H7NO3	10191000	8199900	12113000	9900500	8371800	10758000	12473000	8839800	32396000	37635000	32157000	34183000	150800000	160510000	169080000	173320000	92139000	74460000	84267000	99278000	-	HMDB0000532	10972	543-24-8	40410	5517	--
MEDP0374	Cyclic Amp	Nucleotide And Its metabolomics	Nucleotide and Its metabolomics	330	329.053	[M+H]+	C10H12N5O6P	17569000	17658000	21632000	16863000	42157000	32388000	45068000	42892000	249910	798470	259660	218290	371580	563140	442620	311310	10281000	8057200	9917800	9493500	C00575	HMDB0000058	6076	60-92-4	17489	5120	ko00230,ko01100,ko01522,ko04010,ko04014,ko04015,ko04020,ko04022,ko04024,ko04062,ko04072,ko04114,ko04211,ko04213,ko04261,ko04270,ko04340,ko04361,ko04371,ko04540,ko04611,ko04670,ko04710,ko04713,ko04714,ko04720,ko04723,ko04724,ko04725,ko04726,ko04727,ko04728,ko04740,ko04742,ko04750,ko04910,ko04911,ko04912,ko04913,ko04914,ko04915,ko04916,ko04918,ko04919,ko04921,ko04922,ko04923,ko04924,ko04925,ko04926…
MEDP0378	N6-Succinyl Adenosine	Nucleotide And Its metabolomics	Nucleotide and Its metabolomics	384	383.108	[M+H]+	C14H17N5O8	3029600	2608300	2782000	2598000	3278900	1914400	3078400	3017500	322910	410220	502750	564540	1067400	2134900	981850	915950	990170	1454300	1228100	1858900	-	HMDB0000912	20849086	4542-23-8	71169	5867	--
MEDP0380	2-(Dimethylamino)Guanosine	Nucleotide And Its metabolomics	Nucleotide and Its metabolomics	312	311.123	[M+H]+	C12H17N5O5	120960	129280	93329	139090	63232	69917	45443	53187	26778	22253	18028	27620	424290	676360	313360	253180	94978	99272	122370	141060	-	HMDB0004824	92919	2140-67-2	19289	7086	--
MEDP0382	8-Hydroxy-2-Deoxyguanosine	Nucleotide And Its metabolomics	Nucleotide and Its metabolomics	284	283.092	[M+H]+	C10H13N5O5	85480000	127150000	91588000	69686000	30579000	8456300	34533000	19259000	36732000	5926600	20715000	15220000	54576000	54425000	59280000	24062000	48244000	26896000	41959000	50439000	-	HMDB0003333	73318	88847-89-6	40304	6890	--
MEDP0384	Isoxanthopterin	Heterocyclic compounds	Pteridines and derivatives	180.04	179.044	[M+H]+	C6H5N5O2	224440	183350	85776	182420	35584	65199	38768	61930	247710	208560	190220	184800	100810	137310	123060	99711	146210	144190	178790	316000	C03975	HMDB0000704	10729	529-69-1	16713	5672	--
MEDP0386	N-Acetylthreonine	Amino acid and Its metabolomics	Amino acid derivatives	162	161.069	[M+H]+	C6H11NO4	32258	48008	38856	25324	40301	40424	41361	54526	61078	52317	48722	55646	202000	228730	171200	133110	73681	73301	100560	130100	-	HMDB0062557	152204	17093-74-2	45826	-	--
MEDP0387	L-Homoarginine	Amino acid and Its metabolomics	Amino acids	189	188.127	[M+H]+	C7H16N4O2	49358	23709	25682	47706	14561	24904	50087	38584	3091100	2752900	2424800	3474200	308350	321060	333910	339190	655210	736860	714520	1128600	C01924	HMDB0000670	9085	156-86-5	27747	5640	--
MEDP0389	Pantetheine	CoEnzyme and vitamins	CoEnzyme and vitamins	279.13	278.13	[M+H]+	C11H22N2O4S	133240000	134900000	124600000	133850000	140260000	129000000	126780000	119590000	134440000	136540000	136490000	135280000	126310000	131320000	139030000	128020000	124460000	134580000	136840000	133250000	C00831	HMDB0003426	479	496-65-1	16753	6928	ko00770
MEDP0390	Hypoxanthine-9-β-D-Arabinofuranoside	Nucleotide And Its metabolomics	Nucleotide and Its metabolomics	269.08	268.081	[M+H]+	C10H12N4O5	23167000	27714000	17996000	21877000	5554000	6806000	6315700	7751000	16068000	10862000	13565000	15006000	28047000	45413000	32681000	24664000	19101000	18612000	16319000	16754000	-	HMDB0003040	46874582	7013-16-3	705435	3022	--
MEDP0393	Pyridoxine 5'-Phosphate	CoEnzyme and vitamins	CoEnzyme and vitamins	250	249.04	[M+H]+	C8H12NO6P	16775	16607	23863	29830	9816.3	6723.2	19902	15851	713100	469230	497440	387750	61430	68058	66445	67818	196850	217320	221080	259990	C00627	HMDB0001319	1055	447-05-2	28803	6156	ko00750,ko01100
MEDP0395	DL-Pipecolic Acid	Organic acid And Its derivatives	Organic acid And Its derivatives	130	129.079	[M+H]+	C6H11NO2	1634200	1499400	1832900	1875100	1581400	1495500	1943900	1411900	489820	579740	293050	499020	11882000	11458000	11799000	9737000	2638900	2359800	1869900	3518200	C00408	HMDB0000716	439227	3105-95-1	30913	5684	ko00310,ko01100
MEDP0396	2'-Deoxycytidine-5'-Monophosphate	Nucleotide And Its metabolomics	Nucleotide and Its metabolomics	308	307.057	[M+H]+	C9H14N3O7P	82225	82772	45834	97192	26894	34827	35313	28860	563920	371900	162260	298880	75321	50571	135920	58344	142640	159770	153350	150480	C00239	HMDB0001202	13945	1032-65-1	15918	6078	ko00240,ko01100
MEDP0401	5'-Deoxy-5'-(Methylthio) Adenosine	Nucleotide And Its metabolomics	Nucleotide and Its metabolomics	298	297.09	[M+H]+	C11H15N5O3S	51654000	57660000	38558000	51370000	13198000	20413000	17335000	20354000	7230000	5480900	8143000	6648300	8660500	9648800	9275800	9611000	14363000	16825000	15998000	22509000	C00170	HMDB0001173	439176	2457-80-9	17509	3425	ko00270,ko01100
MEDP0403	Deoxycytidine	Nucleotide And Its metabolomics	Nucleotide and Its metabolomics	228	227.091	[M+H]+	C9H13N3O4	42195	22669	8941.2	16115	9	9	9	9	191370	88215	161930	144130	195920	655860	298640	184900	113700	175330	151510	155310	C00881	HMDB0000014	13711	951-77-9	15698	3367	ko00240,ko01100,ko02010
MEDP0404	Sarcosine	Amino acid and Its metabolomics	Amino acids	90	89.048	[M+H]+	C3H7NO2	904910	1086300	1280600	843770	1305900	890900	889550	1436700	1062000	1109000	997920	870100	848800	943760	1131500	925750	1145200	883750	871320	1081400	C00213	HMDB0000271	1088	107-97-1	15611	51	ko00260,ko00330,ko01100
MEDP0409	Cys-Gly	Amino acid and Its metabolomics	Small Peptide	179	178.041	[M+H]+	C5H10N2O3S	9	9	9	9	9	9	9	9	1440300	2361500	1630300	996630	9	9	9	9	127300	108450	102170	108720	C01419	HMDB0000078	439498	19246-18-5	4047	5134	ko00480,ko01100
MEDP0425	Imidazoleacetic acid	Heterocyclic compounds	Indole and Its derivatives	127.1	126.043	[M+H]+	C5H6N2O2	121390	98834	91319	69340	130240	105970	158990	95724	1695300	1513700	1047800	1479900	1130800	970410	2455100	2142200	737250	1056700	839300	1012700	C02835	HMDB0002024	96215	645-65-8	16974	6445	ko00340,ko01100
MEDP0430	2-Aminoadipic Acid	Organic acid And Its derivatives	Organic acid And Its derivatives	162.1	161.069	[M+H]+	C6H11NO4	259220	265310	163870	144150	235640	325590	173910	122940	1851800	1714700	1580600	1423500	37935000	29122000	25732000	25106000	10894000	12537000	11187000	11649000	C00956	HMDB0000510	469	542-32-5	37024	5496	ko00300,ko00310,ko00311,ko01100,ko01210,ko01230
MEDP0434	LPC(17:0/0:0)	GP	LPC	510.1	509.348	[M+H]+	C25H52NO7P	4747000	5273600	5698400	4796200	5502800	5224200	5380600	5944900	5377000	5793300	5710700	5326100	5848000	5743800	5796100	6060200	5387100	6012000	5915300	6616000	-	HMDB0012108	24779463	50930-23-9	74340	-	--
MEDP0442	Sn-Glycero-3-Phosphocholine	Tryptamines,Cholines,Pigments	Cholines	258.2	257.103	[M+H]+	C8H20NO6P	2652200	2016800	3244200	1458300	2879500	4056300	2811700	2472300	4315000	4261800	1933900	2462600	429320	199980	453260	655400	631740	1893700	1294100	1193700	C00670	HMDB0000086	71920	28319-77-9	16870	370	ko00564,ko00565,ko05231
MEDP0450	P-Aminobenzoate	Benzene and substituted derivatives	Phenolic acids	138	137.048	[M+H]+	C7H7NO2	130540	120640	112960	113870	142950	100610	149270	131330	9	9	9	9	26158	45748	42671	24824	32632	55855	66268	65060	C00568	HMDB0001392	978	150-13-0	30753	3261	ko00790,ko01100
MEDP0453	Indole	Heterocyclic compounds	Indole and Its derivatives	118	117.058	[M+H]+	C8H7N	572190	431970	619730	427320	3603200	2778400	3754900	2604900	196110	273260	489640	176800	1627900	1731300	2056500	1329500	1199500	993100	745670	1598500	C00463	HMDB0000738	798	120-72-9	16881	286	ko00380,ko00400,ko01100,ko04974
MEDP0457	5-Aminolevulinate	Organic acid And Its derivatives	Organic acid And Its derivatives	132.058	131.058	[M+H]+	C5H9NO3	293940	267990	303460	296470	226950	292970	217040	243170	13685000	13698000	11413000	12685000	37086	9	9	9	4431100	4285400	3923600	3779500	C00430	HMDB0001149	137	106-60-5	17549	6037	ko00260,ko00860,ko01100,ko02010
MEDP0461	2-Methylguanosine	Nucleotide And Its metabolomics	Nucleotide and Its metabolomics	298.1	297.107	[M+H]+	C11H15N5O5	1668200	1744800	1263400	1229300	466820	432220	497250	562080	1639700	1005600	1266300	1545700	3540400	5358200	3969400	2924400	1989000	1823700	1767200	2148200	-	HMDB0005862	135501934	2140-77-4	19702	-	--
MEDP0494	LPC(15:0/0:0)	GP	LPC	482.3	481.317	[M+H]+	C23H48NO7P	675600	560680	561000	784720	1160300	1023100	1267800	1120900	73741	71710	73567	73923	59056	54512	65844	48142	297550	294300	329140	336560	-	HMDB0010381	-	-	580912	-	--
MEDP0495	LPC(0:0/18:2)	GP	LPC	520.33	519.332	[M+H]+	C26H50NO7P	84236	17697	44322	57580	72293	111860	110250	84623	22811	9263	11712	17745	10553	9266.4	12091	7721.4	83130	84164	80961	85376	-	-	-	-	-	-	--
MEDP0510	Carnitine C2:0	FA	CAR	204.122	203.116	[M+H]+	C9H17NO4	85792	114780	136830	80345	93668	88340	105880	106550	889840	1070700	897850	994390	358270	352380	598180	445170	445530	557910	507470	645620	C02571	HMDB0000201	1	14992-62-2	57589	-	ko04931
MEDP0514	Thiamine	CoEnzyme and vitamins	CoEnzyme and vitamins	265.111	265.112	[M]+	C12H17N4OS+	181420	165730	178700	228250	159880	247180	265030	189450	104130	57670	50577	75255	1251600	453530	761660	577800	345730	222020	229040	413000	C00378	HMDB0000235	1130	59-43-8	18385	5242	ko00730,ko01100,ko02010,ko04122,ko04977
MEDP0518	DL-Stachydrine	Organic acid And Its derivatives	Organic acid And Its derivatives	144.102	179.071	[M-Cl]+	C7H14ClNO2	45717	91011	130460	75979	59731	47696	56734	156850	1275800	683350	809300	1260200	263270	96489	419810	298000	341490	547090	454370	458480	-	-	44150282	4136-37-2	-	-	--
MEDP0519	L-Norleucine	Amino acid and Its metabolomics	Amino acids	132.102	131.095	[M+H]+	C6H13NO2	1166300	1028600	996180	856790	7987800	5511800	7525800	6240100	429630	564850	1024100	562310	2694200	3276100	3849400	2636300	2333100	2170600	1858000	3236000	C01933	HMDB0001645	6334	327-57-1	18347	6334	--
MEDP0523	DL-Carnitine	FA	CAR	162.112	161.105	[M+H]+	C7H15NO3	104510	110040	139430	91781	121880	124650	122340	81547	3234800	2642300	1812300	2568700	222180	123430	215970	240400	656180	774820	683560	888280	C00318	HMDB0000062	2724480	541-15-1	16347	52	ko04714,ko04976
MEDP0526	6-Dimethylaminopurine	Nucleotide And Its metabolomics	Nucleotide and Its metabolomics	164.086	163.086	[M+H]+	C7H9N5	776910	951130	682370	952820	700310	576890	663400	705880	929700	960070	669260	1070300	8017700	7814300	6650000	6123900	1819000	2118600	1856400	2322200	-	HMDB0000473	3134	938-55-6	60281	5460	--
MEDP0529	Indole-3-acetamide	Heterocyclic compounds	Indole and Its derivatives	175.079	174.079	[M+H]+	C10H10N2O	693770	577910	671620	698670	766920	583330	766090	780970	74891	60410	63900	98487	1833700	2719900	2184100	1941500	747630	498550	578220	543170	C02693	HMDB0029739	397	879-37-8	16031	-	ko00380,ko01100
MEDP0530	15-deoxy-δ-12,14-PGJ2	FA	Oxidized lipids	317.204	316.204	[M+H]+	C20H28O3	9	9	9	9	9	9	9	9	66406	26895	78979	74842	9	9	9	9	122120	172050	148930	185840	C14717	HMDB0005079	5311211	87893-55-8	34159	-	ko00590
MEDP0537	LPC(O-16:0/2:0)	GP	LPC	524.36	523.364	[M+H]+	C26H54NO7P	3246200	2819000	2484300	3330700	8725100	7014400	11658000	8961800	1178000	897100	1259500	1213400	972100	989970	1057100	1025000	2484400	2860500	2359700	2393600	-	HMDB0062195	108156	74389-68-7	44811	-	--
MEDP0545	2-Pyrrolidinone	Heterocyclic compounds	Heterocyclic compounds	86.0528	85.0528	[M+H]+	C4H7NO	2230900	2233400	2602300	2704700	3085300	3230100	2910000	2672700	117810	364690	385750	206080	2936300	5223300	3457100	3486800	1746100	1438900	1249900	1761000	-	HMDB0002039	12025	616-45-5	36592	6452	--
MEDP0574	Oleamide	Alcohol and amines	Amines	282.272	281.272	[M+H]+	C18H35NO	1215200	642570	664900	311540	404080	533790	1215900	1708800	1804100	1232200	371650	314250	358800	340640	1334000	1180000	190520	218050	177390	224270	C19670	HMDB0002117	5283387	301-02-0	116314	-	--
MEDP0576	N1-Acetylspermine	Organic acid And Its derivatives	Organic acid And Its derivatives	245.226	244.226	[M+H]+	C12H28N4O	120190	129940	173910	113730	108790	137950	141570	133350	9	15721	17146	11255	178610	201570	154760	134610	80630	77541	70179	72369	C02567	HMDB0001186	916	25593-72-0	17312	3369	--
MEDP0584	Pterine	Heterocyclic compounds	Pteridines and derivatives	164.049	163.049	[M+H]+	C6H5N5O	59041	43686	54522	60452	47640	50619	27359	55309	327840	346980	347710	308960	100570	113260	74860	96739	166530	181690	133670	110310	C00715	HMDB0000802	73000	2236-60-4	18265	5766	--
MEDP0592	3-Dehydrosphinganine	SL	SM	300.282	299.282	[M+H]+	C18H37NO2	643000	449870	575740	623510	384220	548420	2061800	546720	266780	233540	374460	222850	1416000	1651700	1500900	1314300	632320	632720	555450	676210	C02934	HMDB0001480	439853	16105-69-4	17862	3428	ko00600,ko01100
MEDP0598	2'-Hydroxy-5'-methylacetophenone	Benzene and substituted derivatives	Benzene and substituted derivatives	151.068	150.068	[M+H]+	C9H10O2	848140	985270	769300	1263200	1216500	1387500	676660	1381500	267430	204170	189930	193450	1492000	2545100	1685200	1197300	701180	750830	786450	730590	-	HMDB0032592	15068	1450-72-2	-	-	--
MEDP0601	Spermidine	Alcohol and amines	Polyamines	146.158	145.158	[M+H]+	C7H19N3	197410	241800	188800	192000	108440	134590	98793	52898	4661700	5840800	4737800	5613900	3339900	3629200	3896000	4137100	2612000	2506400	2633500	2706400	C00315	HMDB0001257	1102	124-20-9	16610	254	ko00330,ko00410,ko00480,ko01100,ko02010,ko04976
MEDP0611	N-Acetyl-L-Histidine	Amino acid and Its metabolomics	Amino acid derivatives	198.08	197.08	[M+H]+	C8H11N3O3	141450	226550	123720	156110	145050	148240	169320	114770	1134800	1658500	1561500	672750	396840	329810	405600	322560	370000	450760	387240	422720	C02997	HMDB0032055	273260	2497-02-1	16437	-	--
MEDP0627	Isonicotinic acid	Organic acid And Its derivatives	Organic acid And Its derivatives	124.032	123.032	[M+H]+	C6H5NO2	7708000	5831000	3249200	3590900	2023400	3265000	3481000	1622000	8016200	11860000	15349000	17382000	17687000	14378000	18969000	37634000	25508000	25956000	50343000	65431000	C07446	HMDB0060665	5922	55-22-1	6032	-	ko00983
MEDP0637	Phe-Pro	Amino acid and Its metabolomics	Amino acid derivatives	263.132	262.132	[M+H]+	C14H18N2O3	2511200	3666500	3897600	3868500	3691600	3556000	3387200	3538400	663570	547450	784980	668640	2119800	3510500	2677000	2183000	1812600	1946200	2431000	1754700	-	HMDB0011177	7020642	7669-65-0	74750	-	--
MEDP0638	LPE(16:1/0:0)	GP	LPE	452.27	451.27	[M+H]+	C21H42NO7P	1988800	1857200	1495600	2382400	44894000	44292000	48861000	54081000	105730	18503	22228	30608	4223800	6256900	6404700	4314600	13130000	14709000	13360000	16625000	-	HMDB0011504	52925129	-	-	-	--
MEDP0646	2,3-Dihydrobenzofuran	Heterocyclic compounds	Heterocyclic compounds	121.06	120.058	[M+H]+	C8H8O	53903	37428	43956	27653	31227	22743	28129	33443	20735	23397	39791	31434	38061	57326	26307	30937	34985	32315	51676	60787	-	HMDB0013815	10329	496-16-2	87607	-	--
MEDP0654	2-Phenylacetamide	Benzene and substituted derivatives	Benzene and substituted derivatives	136	135.068	[M+H]+	C8H9NO	384550	350480	406030	296040	315190	319650	404190	358090	67797	61040	59036	49335	655000	1193100	980250	755290	302270	299990	307500	350240	C02505	HMDB0010715	7680	103-81-1	16562	-	ko00360,ko01100
MEDP0658	Ethyl dodecanoate	Alcohol and amines	Amines	229.1	228.209	[M+H]+	C14H28O2	772610	896780	896990	918570	891710	973480	1042200	893580	888000	978700	733320	928980	908370	871770	1024200	910580	940970	856620	971740	1194800	-	HMDB0033788	7800	106-33-2	-	-	--
MEDP0664	L- Tyrosine methyl ester	Amino acid and Its metabolomics	Amino acid derivatives	196.2	195.09	[M+H]+	C10H13NO3	9	9	9	9	9	9	9	9	624970	462920	677180	662720	1350600	2041100	1794900	1300000	807600	787790	849290	908020	C03404	HMDB0029217	70652	1080-06-4	17215	-	--
MEDP0669	3-Chloroaniline	Benzene and substituted derivatives	Benzene and substituted derivatives	128.1	127.019	[M+H]+	C6H6ClN	4009400	4115200	4084900	4246800	4034200	4263000	4215100	4262700	4202600	3846900	4334600	4019800	4307500	4300300	4493600	4308200	3924400	4160700	4136400	4338500	-	-	7932	108-42-9	-	-	--
MEDP0677	Butylamine	Alcohol and amines	Amines	74.1	73.0891	[M+H]+	C4H11N	250660	195870	218690	223110	134250	201000	150610	129200	33434	60973	32664	35800	39393	61960	27632	24477	67713	57947	52343	55277	-	HMDB0031321	8007	109-73-9	43799	-	--
MEDP0682	Hydroxyacetone	Aldehyde,Ketones,Esters	Ketones	75.1	74.0368	[M+H]+	C3H6O2	806460	868360	960780	730370	1042300	778100	772970	874430	923210	1244800	1088800	987910	631850	898580	889750	935510	817660	725670	881480	890060	C05235	HMDB0006961	8299	116-09-6	27957	-	ko00640,ko01100
MEDP0685	Methylcysteine	Amino acid and Its metabolomics	Amino acids	136.2	135.035	[M+H]+	C4H9NO2S	9762500	12020000	11071000	9703000	8069600	7315300	8985500	6972000	25868000	20042000	16124000	19224000	17333000	30396000	20881000	21454000	16123000	12753000	18462000	20980000	-	HMDB0002108	24417	1187-84-4	45658	6490	--
MEDP0691	Ethylparaben	Organic acid And Its derivatives	Organic acid And Its derivatives	167.3	166.063	[M+H]+	C9H10O3	61600	59607	51011	45452	47534	45697	51037	50336	44025	57996	61997	58947	52391	59250	53076	54634	17190	24790	29222	25354	-	HMDB0032573	8434	120-47-8	-	-	--
MEDP0692	Triethylamine	Others	Hydrocarbon derivatives	102	101.12	[M+H]+	C6H15N	587800	433970	636880	669110	361660	517190	565410	631860	192400	9	9	9	670070	1069500	980530	811630	389750	392840	398990	491390	C14691	HMDB0032539	8471	121-44-8	35026	-	--
MEDP0729	Barbituric acid	Heterocyclic compounds	Heterocyclic compounds	129	128.022	[M+H]+	C4H4N2O3	404260	386220	541940	297400	544510	473340	395340	480630	438140	316740	283940	297250	1769100	1855600	3243500	2878800	854080	1044600	954070	1125100	C00813	HMDB0041833	6211	67-52-7	16294	-	ko00240,ko01100
MEDP0745	Creosol	Benzene and substituted derivatives	Phenolics	139.2	138.068	[M+H]+	C8H10O2	2403300	2939200	1799900	2614500	757100	976460	1323800	1280600	294400	254970	353430	339560	290160	322530	357750	305950	638620	646460	687800	778910	-	HMDB0032136	7144	93-51-6	-	-	--
MEDP0765	3-(Methylthio)-1-propanol	Alcohol and amines	Alcohols	107.045	106.045	[M+H]+	C4H10OS	9	9	9	9	9	9	9	9	677070	606640	815280	797680	660970	905190	861690	568650	454780	538780	490800	520710	-	HMDB0031716	10448	505-10-2	49019	-	--
MEDP0789	2-Pentyl-3-phenyl-2-propenal	Aldehyde,Ketones,Esters	Aldehydes	203.4	202.136	[M+H]+	C14H18O	40422	35106	60805	23401	39141	46853	68037	39766	27233	46499	34957	38113	31225	36274	27016	34022	31134	54824	58431	53741	C12288	HMDB0031313	1712058	122-40-7	32318	-	--
MEDP0792	PYRROLIDINE	Heterocyclic compounds	Heterocyclic compounds	72.3	71.0735	[M+H]+	C4H9N	1560900	1516000	1520600	1526900	1117800	1291400	1342300	1321300	278950	189850	288290	260760	2252900	2837400	2205100	2214800	956420	1010800	870590	1024300	-	HMDB0031641	31268	123-75-1	33135	-	--
MEDP0798	1-Naphthylamine	Benzene and substituted derivatives	Benzene and substituted derivatives	144.1	143.073	[M+H]+	C10H9N	388340	367300	496990	380070	491610	392540	404000	502220	289820	345590	376990	354590	392280	314340	405700	326830	385690	302070	361020	291300	C14790	-	8640	134-32-7	-	-	ko00980
MEDP0821	6-Methylnicotinamide	Heterocyclic compounds	Pteridines and derivatives	137.1	136.064	[M+H]+	C7H8N2O	348560	212140	268580	325270	334670	445040	389730	399960	1150500	1044800	1398500	1430500	4199400	9077000	6621700	4774400	2288600	2438400	2136100	2598500	-	HMDB0013704	96351	6960-22-1	88954	-	--
MEDP0823	(R)-2-Hydroxy-3-phenylpropionic acid	Organic acid And Its derivatives	Organic acid And Its derivatives	167	166.063	[M+H]+	C9H10O3	2013000	2104900	2542000	1840800	2019500	2392100	1961100	2021200	2969100	3120600	3038000	3186600	2190900	2502100	2361800	2513100	2386800	2357600	2472100	2868300	C05607	HMDB0000563	643327	7326-19-4	43065	5547	ko00360,ko01100
MEDP0849	Nα-Acetyl-L-glutamine	Amino acid and Its metabolomics	Amino acid derivatives	189.1	188.183	[M+H]+	C7H12N2O4	2020900	1582300	1625300	1917800	1621800	1782100	1985900	1423700	4957100	4246200	3317200	4034900	3174400	4288200	4515100	3918800	2872600	3154600	2787300	3970600	-	HMDB0006029	25561	2490-97-3	21553	-	--
MEDP0859	Gly-Phe	Amino acid and Its metabolomics	Amino acid derivatives	223.2	222.1	[M+H]+	C11H14N2O3	10753000	13897000	14958000	19078000	10724000	13550000	14895000	20522000	86292	14407	44193	39211	27252	23491	50403	20472	4680000	3485300	2391400	3617800	-	HMDB0028848	92953	3321-03-7	-	-	--
MEDP0868	N-Methylalanine	Amino acid and Its metabolomics	Amino acid derivatives	104	103.063	[M+H]+	C4H9NO2	7603100	6444800	6773500	6786100	6029300	8232900	7468500	6102400	4672500	6383500	4384200	5152100	3273000	3144500	2888600	2949600	4540900	4449300	4638800	4804400	-	HMDB0094692	5288725	3913-67-5	17519	-	--
MEDP0873	3'-UMP	Nucleotide And Its metabolomics	Nucleotide and Its metabolomics	369	368	[M+H]+	C9H11N2Na2O9P	54385	33540	18820	15252	29145	19687	46041	47832	189300	203170	185190	138910	62513	74037	130190	55984	84007	78047	81318	100410	C01368	HMDB0060282	71295921	35170-03-7	28895	-	ko00240,ko01100
MEDP0878	N-Methyl-L-Glutamate	Amino acid and Its metabolomics	Amino acid derivatives	162.1	161.069	[M+H]+	C6H11NO4	259220	265310	163870	144150	235640	325590	173910	122940	1851800	1714700	1580600	1423500	37935000	29122000	25732000	25106000	10894000	12537000	11187000	11649000	C01046	HMDB0062660	439377	35989-16-3	16440	-	ko01100
MEDP0879	N-Methyl-D-Aspartic Acid	Amino acid and Its metabolomics	Amino acid derivatives	148.06	147.053	[M+H]+	C5H9NO4	55877	43541	77048	39061	102910	136560	82591	61252	383860	342550	390160	445500	2497400	3386600	2750500	2508900	876020	942770	838800	939030	C12269	HMDB0002393	22880	6384-92-5	31882	6662	--
MEDP0880	N-Alpha-Acetyl-L-Asparagine	Amino acid and Its metabolomics	Amino acid derivatives	175.3	174.064	[M+H]+	C6H10N2O4	13143000	15053000	16367000	13801000	17773000	15605000	14864000	17216000	280950	369570	284220	422330	249630	392980	373520	355300	3125500	3502100	3002500	3616900	-	HMDB0006028	99715	4033-40-3	-	-	--
MEDP0881	Phosphocholine	Nucleotide And Its metabolomics	Nucleotide and Its metabolomics	185.1	184.074	[M+H]+	C5H15NO4P	239370	341890	252280	181260	192930	206120	108890	275670	2573300	3690600	3665300	3417900	1666000	1289600	1237700	1405800	2230500	1616600	2270500	1950700	C00588	HMDB0001565	1014	107-73-3	18132	6326	ko00564,ko01100,ko05231
MEDP0882	Thiamine Monophosphate	Heterocyclic compounds	Heterocyclic compounds	345	345.079	[M]+	C12H18N4O4PS	70765	83141	60188	86405	15976	5607.7	18956	13851	107280	102190	116920	107590	506400	401280	802320	801300	210350	176770	209290	331530	C01081	HMDB0002666	3382778	273724-21-3	37574	3488	ko00730,ko01100
MEDP0883	2,4-Dihydroxypteridine	Heterocyclic compounds	Pteridines and derivatives	165.3	164.033	[M+H]+	C6H4N4O2	154200	131260	90317	160750	70695	72480	84702	91540	223500	165970	165380	240770	166790	199900	192690	162660	117900	148970	93192	179520	C03212	-	10250	487-21-8	-	-	--
MEDP0886	N-Amidino-L-Aspartate	Amino acid and Its metabolomics	Amino acid derivatives	176.4	175.059	[M+H]+	C5H9N3O4	9	9	9	9	9	9	9	9	9	35997	9	9	346160	382570	199970	292320	64540	67910	82987	72957	C03139	HMDB0003157	439918	6133-30-8	17072	10	--
MEDP0891	L-Tryptophanamide	Amino acid and Its metabolomics	Amino acid derivatives	204.3	203.106	[M+H]+	C11H13N3O	45387	50440	51033	32593	262550	202070	279890	229650	11439	24432	37226	19426	115100	110530	131090	92408	66900	79383	49698	66695	C00977	HMDB0013318	439356	20696-57-5	791437	-	--
MEDP0892	Catechol	Benzene and substituted derivatives	Phenolics	111.1	110.037	[M+H]+	C6H6O2	2720300	2883900	3282200	3005900	3049700	3325100	3099100	2965600	2827800	3304000	3398200	3576400	3087100	2559600	3324700	3430500	2757700	3346800	3166700	3335200	C00090	HMDB0000957	289	120-80-9	18135	282	ko01100
MEDP0894	3-Methoxytyramine	Benzene and substituted derivatives	Phenolics	168.1	167.095	[M+H]+	C9H13NO2	199320	193110	208240	226500	201030	220600	207720	195560	100880	80435	76112	103580	201120	250960	233260	229970	118520	129870	157070	164980	C05587	HMDB0000022	1669	1477-68-5	742324	5094	ko00350,ko01100,ko04728
MEDP0898	Pyridoxal	Heterocyclic compounds	Pteridines and derivatives	168.3	167.058	[M+H]+	C8H9NO3	132350	101840	67591	108850	92063	60001	64044	83289	2002900	1762700	2114600	1749600	654970	1075700	763280	838800	840730	1121200	1244700	1129200	C00250	HMDB0001545	1050	66-72-8	17310	6312	ko00750,ko01100,ko04977
MEDP0899	3-Methyladenine	Nucleotide And Its metabolomics	Nucleotide and Its metabolomics	150.3	149.07	[M+H]+	C6H7N5	620550	650040	710860	779560	538860	640470	716920	704570	231570	231380	205340	273980	1057700	1331100	1018700	1222800	471160	552010	493810	574060	C00913	HMDB0011600	1673	5142-23-4	38635	-	--
MEDP1001	Delta-Hexalactone	Aldehyde,Ketones,Esters	Esters	115.075	114.068	[M+H]+	C6H10O2	60706	77711	87520	119240	55496	62128	55574	81072	54333	141750	196570	113640	130970	153150	94129	69867	79636	144190	154550	113420	-	HMDB0000453	13204	823-22-3	589927	5442	--
MEDP1003	1-Hydroxylamino-2-phenylethane	Benzene and substituted derivatives	Benzene and substituted derivatives	120.073	137	[M-H2O+H]+	C8H11NO	7225900	7531500	6720600	7580200	6956400	7080200	6866000	7345000	2937100	2906600	2994400	3420500	7530900	8314100	6995500	6929800	5775700	4490300	5297400	5215300	-	-	165091	3217-93-4	-	-	--
MEDP1010	Coenzyme II (β-NADP)	Nucleotide And Its metabolomics	Nucleotide and Its metabolomics	744	743.075	[M+H]+	C21H28N7O17P3	9	9	9	9	9	9	9	9	377050	310370	368040	449160	233680	324320	285550	501840	190500	238770	238440	285810	C00006	HMDB0000217	5885	53-59-8	18009	5227	ko00480,ko00760,ko00983,ko01100,ko04918,ko04925
MEDP1011	D-(+)-sucrose	Carboxylic acids and derivatives	Sugars	365.106	342.116	[M+Na]+	C12H22O11	153480	134700	136440	208120	2820900	2089000	3532900	1993400	1490400	655060	1014000	944030	221050	9	286830	171640	540670	397750	534820	729420	C00089	HMDB0000258	5988	57-50-1	-	-	ko00052,ko00500,ko01100,ko02010,ko04742,ko04973
MEDP1013	γ-L-Glutamate-Cysteine	Amino acid and Its metabolomics	Small Peptide	251.06	250.062	[M+H]+	C8H14N2O5S	9	9	9	9	9	9	9	9	703290	586300	604440	585480	367390	356110	351460	417230	488480	557730	653890	424340	C00669	HMDB0001049	123938	636-58-8	17515	5966	ko00480,ko01100,ko04216
MEDP1018	5'-Deoxyadenosine	Nucleotide And Its metabolomics	Nucleotide and Its metabolomics	252	251.102	[M+H]+	C10H13N5O3	5505000	6622600	4061500	4810200	907800	1292600	1125600	1456100	20946000	11702000	9834600	9856500	5340400	7403200	7279000	4451300	7817000	7430300	6246800	8076600	-	HMDB0001983	439182	4754-39-6	17319	-	--
MEDP1022	Threoninyl-Phenylalanine	Amino acid and Its metabolomics	Small Peptide	267.124	266.127	[M+H]+	C13H18N2O4	43808	77166	65282	90009	68776	88877	102050	138550	60742	66271	97055	86665	73635	81651	73573	52319	38630	69569	60198	56642	-	HMDB0029068	4099799	-	-	-	--
MEDP1033	Benzaldehyde	Benzene and substituted derivatives	Benzene and substituted derivatives	107.048	106.042	[M+H]+	C7H6O	6302700	6350300	5821300	7101500	6804200	6456700	6207700	6653500	3154000	2829100	2513400	3081600	7193300	8970200	6883600	7156100	3717100	4630200	5093300	5196400	C00193	HMDB0006115	240	100-52-7	17169	-	--
MEDP1035	alpha-hexylcinnamaldehyde	Benzene and substituted derivatives	Benzene and substituted derivatives	217.159	216.151	[M+H]+	C15H20O	110530	83760	105660	99381	85640	79297	56660	140840	50589	53692	57164	59939	39841	57439	39080	40492	73684	50009	60838	56074	-	HMDB0031736	1550884	101-86-0	55365	-	--
MEDP1040	N-(2-hydroxyethyl)stearamide	Alcohol and amines	Amines	328.319	327.314	[M+H]+	C20H41NO2	56959	35793	43625	59616	83642	109400	120420	112770	18543	11433	34217	24003	32091	63547	48462	87706	51040	70573	89426	72926	-	-	27902	111-57-9	-	-	--
MEDP1046	Triphenyl phosphate	Aldehyde,Ketones,Esters	Esters	327.077	326.071	[M+H]+	C18H15O4P	78895	84352	40849	68208	50247	38789	72309	56277	50774	73617	71821	56567	70170	54958	62762	70376	89676	61991	78933	76498	C14235	-	8289	115-86-6	-	-	--
MEDP1051	Sphingosine	SL	SM	300.282	299.282	[M+H]+	C18H37NO2	643000	449870	575740	623510	384220	548420	2061800	546720	266780	233540	374460	222850	1416000	1651700	1500900	1314300	632320	632720	555450	676210	C00319	HMDB0000252	5280335	123-78-4	16393	392	ko00600,ko01100,ko04071,ko04210,ko04217
MEDP1060	Hydroxyquinoline	Heterocyclic compounds	Heterocyclic compounds	146.051	145.053	[M+H]+	C9H7NO	120210	127180	125900	87685	793120	551730	712710	615680	67675	72784	119340	79232	280980	318560	338590	272760	239260	236490	181130	305830	C19434	-	1923	148-24-3	-	-	--
MEDP1061	DL-O-tyrosine	Amino acid and Its metabolomics	Amino acids	166	165.079	[M+H]+	C9H11NO2	97328000	100500000	102400000	94376000	89250000	93875000	95950000	93090000	36641000	47949000	47872000	47309000	96406000	102070000	99073000	102490000	73045000	72964000	75002000	83317000	C02057	HMDB0006050	994	150-30-1	91038	-	--
MEDP1063	Indole-5-carboxylic acid	Heterocyclic compounds	Indole and Its derivatives	162.045	161.048	[M+H]+	C9H7NO2	51412	51697	52830	44209	43725	55744	70036	65816	96006	111860	103630	119390	1026600	1445700	1002400	923210	223670	237910	224230	258580	-	-	74280	1670-81-1	-	-	--
MEDP1064	9-Fluorenol	Alcohol and amines	Alcohols	183.077	182.073	[M+H]+	C13H10O	242200	274040	293990	292430	248310	260030	311700	313630	268980	277400	239380	289220	241000	282530	271720	213370	156110	164350	150850	346800	-	HMDB0059803	74318	1689-64-1	16904	-	--
MEDP1067	Palmitoyl N-isopropylamide	Alcohol and amines	Amines	320.298	297.303	[M+Na]+	C19H39NO	2803400	1811700	2703800	3343600	197610	231180	5786400	315680	152370	164310	224170	148820	171660	152870	174290	155550	734540	856000	908870	941350	-	-	5063962	189939-61-5	-	-	--
MEDP1073	6-O-methylguanine	Nucleotide And Its metabolomics	Nucleotide and Its metabolomics	166.063	165.065	[M+H]+	C6H7N5O	1698300	1832700	1457100	1703200	1000900	811390	1055900	1086700	546040	434220	431180	438900	1314200	1253800	1383400	1172900	977920	848650	859410	949790	-	-	65275	20535-83-5	-	-	--
MEDP1076	Kojibiose	Others	Others	325.111	342.116	[M-H2O+H]+	C12H22O11	15732	13666	11484	14194	195290	89221	124710	177920	953450	707840	1221600	1003000	71823	32385	58305	58910	237480	234740	209460	279690	C19632	HMDB0011742	164939	2140-29-6	33020	-	--
MEDP1077	2'-O-methyladenosine	Nucleotide And Its metabolomics	Nucleotide and Its metabolomics	348.1	281.112	[M+H]+	C11H15N5O4	11463000	17870000	7235400	13579000	1581600	2021200	1396300	2041700	24698000	19823000	30469000	20485000	9992200	10746000	14419000	11930000	14364000	13922000	13315000	14283000	C04779	HMDB0004326	102213	2140-79-6	119928	-	--
MEDP1083	Oxypurinol	Nucleotide And Its metabolomics	Nucleotide and Its metabolomics	153	152.033	[M+H]+	C5H4N4O2	2286800	2541000	1274100	1676700	572240	485700	517010	684690	495520	242120	404690	334720	1391200	2706400	1290000	1275700	876670	913840	1064400	1111500	C07599	HMDB0000786	135398752	2465-59-0	28315	5752	--
MEDP1093	Allopurinol	Nucleotide And Its metabolomics	Nucleotide and Its metabolomics	137.048	136.038	[M+H]+	C5H4N4O	429220	287590	229830	378470	369190	639060	564190	584410	2039800	1913600	1970300	2149200	5044700	10318000	7975700	5982200	3899700	3225500	2894000	2981400	-	HMDB0014581	135401907	315-30-0	40279	-	--
MEDP1097	MG(18:2/0:0/0:0)	GL	MG	355	354.277	[M+H]+	C21H38O4	93648	98548	86647	95854	99922	79296	69343	63844	84975	134850	108450	66664	86788	104910	79236	89489	97910	131960	106200	153860	-	-	5365676	3443-82-1	-	-	--
MEDP1100	2-Aminomethylpyrimidine	Nucleotide And Its metabolomics	Nucleotide and Its metabolomics	110.07	109.064	[M+H]+	C5H7N3	3489600	3473700	3653700	3388800	3165800	3093900	3242300	3454700	5086500	3835900	3572800	3883500	2622300	3861100	3321400	2930400	2962100	2995700	2827400	2714400	-	-	17848325	372118-67-7	-	-	--
MEDP1123	D-Turanose	Others	Others	325.111	342.116	[M-H2O+H]+	C12H22O11	15732	13666	11484	14194	195290	89221	124710	177920	953450	707840	1221600	1003000	71823	32385	58305	58910	237480	234740	209460	279690	C19636	-	54301978	547-25-1	-	-	--
MEDP1126	(R)-(-)-2-phenylglycine	Amino acid and Its metabolomics	Amino acid derivatives	120.073	137.084	[M-H2O+H]+	C8H11NO	7225900	7531500	6720600	7580200	6956400	7080200	6866000	7345000	2937100	2906600	2994400	3420500	7530900	8314100	6995500	6929800	5775700	4490300	5297400	5215300	-	-	2724025	56613-80-0	-	-	--
MEDP1127	1-acetylindole	Heterocyclic compounds	Indole and Its derivatives	160.1	159.068	[M+H]+	C10H9NO	167010	152430	172890	164640	639590	560350	688530	620290	98399	111020	118950	86764	289670	304160	268180	266710	220560	258070	278720	245480	-	-	68470	576-15-8	-	-	--
MEDP1138	1-methylhistamine	Alcohol and amines	Polyamines	126.101	125.095	[M+H]+	C6H13Cl2N3	90617	60575	73149	56103	57267	49920	83030	54935	87888	78183	41694	50103	37650	41267	60293	75186	90705	76711	66986	79671	C05127	HMDB0000898	11957601	6481-48-7	29009	5854	ko00340,ko01100
MEDP1139	Linoleylethanolamide	Alcohol and amines	Amines	324.288	323.282	[M+H]+	C20H37NO2	37148	22580	38942	45012	104330	65542	102140	111560	3685.8	3422.4	4757.5	4188.8	11816	18266	18155	19098	39940	29689	29171	25234	-	-	5283446	68171-52-8	-	-	--
MEDP1144	L-Isoleucine	Amino acid and Its metabolomics	Amino acids	132.092	131.095	[M+H]+	C6H13NO2	120400000	124020000	109920000	124630000	58100000	100660000	87127000	126450000	14933000	12057000	13737000	22426000	153380000	191250000	176690000	152780000	83110000	81707000	53941000	68337000	C00407	HMDB0000172	6306	73-32-5	17191	5193	ko00280,ko00290,ko00970,ko01100,ko01210,ko01230,ko02010,ko04974,ko04978,ko05131,ko05230
MEDP1148	LTE4	FA	Oxidized lipids	440.237	439.239	[M+H]+	C23H37NO5S	2003.3	3416.9	1837.4	2666.1	6488.7	3959	14296	15324	12237	8257	10150	9010	1334.1	3311.2	3551.3	2784.7	37388	31849	34628	31630	C05952	HMDB0002200	5280879	75715-89-8	15650	-	ko00590,ko01100,ko04080,ko04664
MEDP1161	Creatine phosphate	Nucleotide And Its metabolomics	Nucleotide and Its metabolomics	212.043	211.036	[M+H]+	C4H10N3O5P	5120.5	16033	28629	16654	17297	8394.1	12122	9660	110730	131690	137550	135150	57782	37972	61927	55173	69186	83612	70968	102450	C02305	HMDB0001511	587	67-07-2	17287	6288	ko00330,ko01100
MEDP1162	1-Methylguanine	Nucleotide And Its metabolomics	Nucleotide and Its metabolomics	166.063	165.065	[M+H]+	C6H7N5O	1698300	1832700	1457100	1703200	1000900	811390	1055900	1086700	546040	434220	431180	438900	1314200	1253800	1383400	1172900	977920	848650	859410	949790	C04152	HMDB0003282	3778	938-85-2	21803	3778	--
MEDP1163	Palmitoyl-EA	Alcohol and amines	Amines	298.3	297.267	[M+H]+	C18H35NO2	9	9	9	9	38096	27915	28408	44849	9	9	9	9	1508600	2258100	2125600	1687800	277150	323280	303200	305970	-	-	54428293	94421-67-7	-	-	--
MEDP1170	9-octadecenal	Aldehyde,Ketones,Esters	Aldehydes	313.3	266.261	[M+H]+	C18H34O	456660	441580	474220	414420	457220	551390	664990	564420	218720	186790	147610	151460	472280	358090	349690	412480	362040	390490	379150	568830	-	HMDB0030965	5283381	5090-41-5	417823	-	--
MEDP1177	N-Methyl-α-aminoisobutyric acid	Amino acid and Its metabolomics	Amino acid derivatives	235.2	117.079	[2M+H]+	C5H11NO2	11508000	12280000	12957000	10429000	12055000	12465000	13541000	12966000	26372000	32499000	15781000	25456000	169860000	149940000	159620000	179930000	84098000	101980000	101420000	111470000	-	HMDB0002141	75725	2566-34-9	134261	6508	--
MEDP1183	N-Acetylcadaverine	Alcohol and amines	Polyamines	145.1	144.126	[M+H]+	C7H16N2O	1611100	1614500	1177100	1563600	510480	887090	511180	964690	1821600	2602000	2431400	2488500	12942000	25434000	12034000	19094000	3314100	3299300	2991300	3834400	-	HMDB0002284	189087	32343-73-0	88824	-	--
MEDP1193	Flavin Single Nucleotide(FMN)	Nucleotide And Its metabolomics	Nucleotide and Its metabolomics	457.102	456.105	[M+H]+	C17H21N4O9P	1427300	1181500	1012900	1717400	170140	89175	157350	117360	1782300	1602800	1788900	2117300	2291300	3364800	3358900	2679800	1669500	2023300	2082400	1570600	C00061	HMDB0001520	3361	146-17-8	17621	6295	ko00190,ko00740,ko01100,ko04977
MEDP1196	Biotinamide	Alcohol and amines	Polyamines	244.108	243.104	[M+H]+	C10H17N3O2S	9	9	9	9	9	9	9	9	173550	106360	115100	93382	66981	61783	61268	44859	44019	51138	73607	46116	C01893	HMDB0001458	5006	6929-42-6	16615	6255	--
MEDP1197	Hypotaurocyamine	Alcohol and amines	Polyamines	152	151.042	[M+H]+	C3H9N3O2S	5191000	5023600	3419600	4196200	1091100	1190300	1190900	1721500	1161900	678810	706400	784980	1699100	2833700	2314500	1699100	1640600	1844300	1583700	1828000	C02419	-	11062553	1119-54-6	-	-	--
MEDP1202	5'-deoxy-5'-fluoroadenosine	Nucleotide And Its metabolomics	Nucleotide and Its metabolomics	270.1	269.092	[M+H]+	C10H12FN5O3	2954800	3444200	2355000	3263600	818240	1058700	956830	840780	2988300	1756300	2312400	2022800	4233900	6496900	4676700	3314100	2168500	2496900	2133500	2700300	C19766	-	448403	731-98-6	-	-	--
MEDP1203	(1R, 6S) -6-amino-5-oxocyclohexyl-2-ene-1-carboxylic acid ester	Aldehyde,Ketones,Esters	Esters	156.1	155.058	[M+H]+	C7H9NO3	51624000	57671000	62693000	51533000	52061000	47080000	48090000	44834000	93507000	68473000	75073000	77410000	45675000	68031000	57060000	51757000	52471000	54995000	48900000	61356000	C19831	-	49852389	-	-	-	ko01100
MEDP1212	1,3-Dicyclohexylurea	Alcohol and amines	Polyamines	225.196	224.189	[M+H]+	C13H24N2O	227610	251900	253250	220840	283830	242270	228110	239130	225630	270380	261270	253290	237770	253690	247360	271240	227930	257300	257710	253920	-	-	4277	2387-23-7	-	-	--
MEDP1221	PC(O-16:0/O-1:0)	GP	PC-O	496.3	495.369	[M+H]+	C25H54NO6P	18333000	16032000	14236000	19681000	37182000	31433000	43213000	37077000	5202500	3387400	3760900	3798600	271840	361880	369490	324430	10826000	11752000	10828000	12093000	-	-	-	-	-	-	--
MEDP1242	4-tert-butylbenzoic acid	Benzene and substituted derivatives	Phenolic acids	179.106	178.099	[M+H]+	C11H14O2	688600	556110	566600	527590	371650	413160	396320	319180	511340	654250	487650	503600	424720	302520	370290	338360	202070	184370	159590	220090	C14535	-	17395535	98-73-7	-	-	--
MEDP1246	2,4-diacetamino-2,4,6-triphenoxy-D-mannopyranose	Carboxylic acids and derivatives	Sugar derivatives	247.1	246.122	[M+H]+	C10H18N2O5	9	9	9	9	9	9	9	9	544820	305360	344090	510860	497570	731160	639660	375100	342410	228160	306130	224330	C20424	-	163312161	-	-	-	ko00520,ko01100
MEDP1247	1-deoxyvaleric acid	Organic acid And Its derivatives	Organic acid And Its derivatives	235.2	234.162	[M+H]+	C15H22O2	1229700	1120600	1179800	1158200	1002900	1216600	1188100	1078000	1046200	1088800	1149500	1098000	911560	1035800	1058600	1150000	1167100	1245400	1326800	1785800	C20404	-	71448993	-	-	-	ko01100
MEDP1251	2-Mercaptobenzothiazole	Heterocyclic compounds	Heterocyclic compounds	167.994	166.986	[M+H]+	C7H5NS2	74681	71208	77078	64335	67357	65718	66877	64318	33289	38014	27635	35043	47966	70259	70066	49926	68713	44272	41847	56122	C14437	-	17395437	149-30-4	-	-	--
MEDP1260	Menadione-9	Benzene and substituted derivatives	Benzene and substituted derivatives	785.6	784.616	[M+H]+	C56H80O2	9	9	9	9	9	9	9	9	102190	52466	69257	61808	9	9	9	9	101310	108760	117030	128620	C21526	-	6289935	523-39-7	-	-	--
MEDP1273	10-deoxyformamycin	Others	Others	454.3	453.309	[M+H]+	C25H43NO6	1728800	1783200	1423300	1826600	2516900	2700800	2992500	3103000	192740	102800	143770	181270	443900	660370	589680	493190	1326500	1493200	1591300	1644800	C11994	-	14155	11091-33-1	-	-	ko01100
MEDP1274	(4Z, 7Z, 10Z, 13Z, 16Z, 19Z) -Eicosahexaenoate	Aldehyde,Ketones,Esters	Esters	357.3	356.272	[M+H]+	C24H36O2	16422	11469	9485.7	15201	26449	18232	26421	23267	666920	389860	526810	435960	5824.3	9	9	9	795990	858510	835460	808120	C16185	-	47205493	81926-94-5	-	-	--
MEDP1276	Guanine	Nucleotide And Its metabolomics	Nucleotide and Its metabolomics	152.1	151.049	[M+H]+	C5H5N5O	3355900	3108600	2793300	2976100	3001700	2740700	3299600	3469300	1464200	837330	1192800	1198000	4573200	5234200	5054900	4118800	2390200	2322600	2388200	2581100	C00242	HMDB0000132	764	73-40-5	16235	315	ko00230,ko01100
MEDP1288	Chrysophanol	Benzene and substituted derivatives	Benzene and substituted derivatives	255.056	254.058	[M+H]+	C15H10O4	188480	167410	174870	173360	169240	177000	169450	181370	9	9	9	9	80230	113640	97472	71895	51385	66138	68266	73509	C10315	HMDB0030670	10208	481-74-3	3687	-	--
MEDP1292	3'-Dephosphocoenzyme A	CoEnzyme and vitamins	CoEnzyme and vitamins	688.147	687.149	[M+H]+	C21H35N7O13P2S	9	9	9	9	9	9	9	9	8395100	2625800	4014600	5648400	14389000	14899000	20852000	13738000	5099900	4662200	7657800	7990100	C00882	HMDB0001373	439335	3633-59-8	15468	3689	ko00770,ko01100
MEDP1294	Leu-Gly	Amino acid and Its metabolomics	Small Peptide	189.114	188.116	[M+H]+	C8H16N2O3	578220	1513600	1527300	4713900	23078000	6797500	24720000	13273000	377640	143380	211640	291950	144080	235780	204990	171960	3496700	2368400	2854400	2895200	-	-	79070	615-82-7	-	-	--
MEDP1295	Cytarabine	Nucleotide And Its metabolomics	Nucleotide and Its metabolomics	244.083	243.086	[M+H]+	C9H13N3O5	216180	200420	152930	203550	112580	58063	77680	97687	2111000	749380	998350	676750	1794500	4036300	3116500	1713700	609450	928390	1608400	1075700	C02961	HMDB0015122	6253	147-94-4	28680	-	--
MEDP1304	Piperidone	Heterocyclic compounds	Heterocyclic compounds	170.1	169.11	[M+H]+	C9H15NO2	82593	107310	162000	100160	83312	52334	100690	119170	406300	258800	173000	66344	92190	145670	212680	155730	71619	62953	64222	76453	C17730	-	96024060	28186	-	-	--
MEDP1307	(2S, 3S) -3-methylphenylalanine	Amino acid and Its metabolomics	Amino acid derivatives	180.101	179.095	[M+H]+	C10H13NO2	29916	47394	42515	55708	50153	33813	58133	29716	175970	165390	198010	154960	504490	559720	559550	385760	295530	159110	234890	298550	C20895	-	854352	25488-25-9	-	-	--
MEDP1316	MG(0:0/16:0/0:0)	GL	MG	331.274	330.304	[M+H]+	C19H38O4	1172600	1170500	1246800	1079700	1240100	1698200	1714900	2003900	1764300	1178700	1258500	1771900	1935000	1005500	1406200	2087800	1525500	2454000	1673400	2563800	-	-	-	-	-	-	--
MEDP1333	LPC(0:0/20:4)	GP	LPC	544.331	543.332	[M+H]+	C28H50NO7P	295100	124470	170910	264490	372150	274280	552570	718580	43174	8189.9	16446	25289	10123	7090.6	8639.2	24273	328370	315710	324820	277600	-	-	-	-	-	-	--
MEDP1334	LPC(20:4/0:0)	GP	LPC	544.331	543.332	[M+H]+	C28H50NO7P	295100	124470	170910	264490	372150	274280	552570	718580	43174	8189.9	16446	25289	10123	7090.6	8639.2	24273	328370	315710	324820	277600	-	-	-	-	-	-	--
MEDP1337	LPC(18:0/0:0)	GP	LPC	524.363	523.364	[M+H]+	C26H54NO7P	1257700	1143500	986450	1399900	3645500	1961700	4103000	3669900	224430	173610	149950	203510	332330	451240	412790	344220	928790	1149800	1166500	1076600	-	HMDB0010384	497299	-	73858	-	--
MEDP1339	LPC(18:1/0:0)	GP	LPC	522.347	521.348	[M+H]+	C26H52NO7P	10158000	6137200	6834500	11699000	23842000	18886000	27770000	26623000	407160	276380	383150	327080	122080	179520	185700	91443	4657600	4970200	4458100	4607700	-	HMDB0010385	53480465	3542-29-8	86255	-	--
MEDP1341	LPC(18:2/0:0)	GP	LPC	520.33	519.332	[M+H]+	C26H50NO7P	588980	196670	270500	558710	622640	852010	944180	987420	813750	470360	566570	439350	29752	25569	47743	15654	400440	409340	478790	459170	-	HMDB0010386	11005824	-	28733	-	--
MEDP1346	LPC(0:0/16:0)	GP	LPC	496.331	495.332	[M+H]+	C24H50NO7P	18176000	15845000	14118000	18789000	37588000	31511000	45939000	37136000	5471600	3318300	3847500	3664400	274060	355080	383980	303310	11185000	10711000	10467000	12400000	-	-	-	-	-	-	--
MEDP1356	Shinorine	Amino acid and Its metabolomics	Amino acid derivatives	333.128	332.122	[M+H]+	C13H20N2O8	1577800	1696200	1412100	1744000	9	1651200	1226300	924160	707050	1019700	1179800	658380	1629800	1533200	1335100	1213600	985420	948080	1429600	1231600	-	HMDB0039002	-	73112-73-9	-	-	--
MEDP1358	mycosporine-glutaminol	Amino acid and Its metabolomics	Amino acid derivatives	303	302.32	[M+H]+	C13H22N2O6	9	9	9	9	9	9	9	9	1380900	1200700	1898000	1257700	9	9	9	9	1337700	1231900	1370000	1278000	-	-	101835613	-	-	-	--
MEDP1360	Mycosporine glycine	Amino acid and Its metabolomics	Amino acid derivatives	246.1	245.09	[M+H]+	C10H15NO6	139640	42142	70339	101230	38409	169230	117070	33427	930750	1250400	777080	1151700	46129	16257	88576	119300	914600	1371000	1332500	1809400	-	-	14444486	65318-21-0	-	-	--
MEDP1367	Ala-Tyr	Amino acid and Its metabolomics	Small Peptide	253.118	252.111	[M+H]+	C12H16N2O4	308770	324920	199550	262540	57619	89334	70382	81303	1011300	508710	479360	514150	261260	353790	358380	270730	398040	347520	338140	361680	-	-	572319	-	-	-	--
MEDP1371	Carnitine C23:5	FA	CAR	488.373	488.373	[M+H]+	C30H49NO4	348400	294690	278030	310370	115170	120280	147310	157610	118340	82538	76306	125650	29977	43284	26943	35111	269840	313890	278790	278450	-	-	-	-	-	-	--
MEDP1373	Carnitine C22:2	FA	CAR	480.405	480.405	[M+H]+	C29H53NO4	1701600	1164900	1157000	1244300	5145100	5273200	5853800	6210400	93659	64959	57395	67973	1012700	1346200	1161300	972500	1470000	1661900	1618900	1865300	-	-	-	-	-	-	--
MEDP1387	Carnitine C19:2	FA	CAR	438.358	438.358	[M+H]+	C26H47NO4	782340	899480	901170	798250	1194300	1105300	1007200	984620	1175800	1366000	1278500	1177300	1640600	1600200	1581800	1603700	907770	880970	925600	1050900	-	-	-	-	-	-	--
MEDP1388	Carnitine C18:3-OH	FA	CAR	438.3	438.321	[M+H]+	C25H43NO5	171980	159150	139320	226290	180630	169660	209250	251450	28177	15421	19215	22308	6601.1	7945.8	7375.8	2716.8	142870	154690	130040	122650	-	-	-	-	-	-	--
MEDP1394	Carnitine C15:DC	FA	CAR	416.339	416.339	[M+H]+	C22H41NO6	31242	27104	33893	44956	11467	13279	27886	14328	14602	11387	9090.8	18023	14237	16479	7972.7	13444	8904.6	10046	7394.9	13068	-	-	-	-	-	-	--
MEDP1424	Carnitine C9:0	FA	CAR	302.2	302.233	[M+H]+	C16H31NO4	139330	122330	133790	169260	144360	110980	155920	177040	9	9	9	9	117050	174460	170730	96471	69276	65240	70254	68098	-	-	-	-	-	-	--
MEDP1446	Octadecadienamide	Alcohol and amines	Amines	280.264	279.256	[M+H]+	C18H33NO	382330	219020	188970	61785	97738	126590	350690	397010	377600	269680	143530	79932	42271	94274	349080	284410	70152	66966	77515	71770	-	-	-	-	-	-	--
MEDP1458	FFA(22:7)	FA	FFA	327.2	326.224	[M+H]+	C22H30O2	27415	31026	33907	29579	32551	15855	26784	30449	24721	40643	30169	21570	24787	24278	28506	25508	26123	24499	27022	31916	-	-	-	-	-	-	--
MEDP1465	(2S,3S)-butane-2,3-diol	Alcohol and amines	Alcohols	73.064	90.0681	[M-H2O+H]+	C4H10O2	665140	701760	757890	709310	501220	516050	618780	592110	120340	135840	167370	165810	1185000	1395300	1078100	1035800	428450	427320	452000	520180	-	-	439888	19132-06-0	-	-	--
MEDP1466	Ureidosuccinic acid	Amino acid and Its metabolomics	Amino acid derivatives	177	176.13	[M+H]+	C5H8N2O5	125940	53258	90774	130650	432300	455170	439840	248010	244870	255550	176120	219500	9	9	7490.7	13136	91556	119810	121490	197110	C00438	HMDB0000828	93072	13184-27-5	15859	5791	ko00240,ko00250,ko01100
MEDP1467	5-Methyl-2'-deoxycytidine	Nucleotide And Its metabolomics	Nucleotide and Its metabolomics	242	241.106	[M+H]+	C10H15N3O4	9	9	9	9	9	9	9	9	18360	21391	20922	15565	11820	9	9	9	21915	20863	21588	18654	C03592	HMDB0002224	440055	838-07-3	27964	-	--
MEDP1468	Pantothenol	CoEnzyme and vitamins	CoEnzyme and vitamins	206	205.25	[M+H]+	C9H19NO4	9	9	9	9	9	9	9	9	53605	231640	53294	66430	9	9	9	9	31524	24101	44828	38487	C05944	HMDB0004231	4678	16485-10-2	895821	7032	ko00770
MEDP1470	Diethyl 2-methyl-3-oxosuccinate	Aldehyde,Ketones,Esters	Aldehydes	203	202.2	[M+H]+	C9H14O5	44770	42497	39813	33762	52205	45855	46114	45164	38912	42684	33691	42213	32697	37379	34882	39332	36601	38097	36345	28036	-	HMDB0032306	97750	759-65-9	16879	-	--
MEDP1472	N'-Methyl-2-pyridone-5-carboxamide	Heterocyclic compounds	Pteridines and derivatives	153	152.059	[M+H]+	C7H8N2O2	9	9	9	9	9	9	18857	6799.2	40992	27947	56850	46087	216070	416050	398730	214780	186310	222440	181010	212370	-	HMDB0004193	69698	701-44-0	27410	7025	--
MEDP1484	Quinoline-4-carboxylic acid	Organic acid And Its derivatives	Organic acid And Its derivatives	174	173.17	[M+H]+	C10H7NO2	38149	52933	62775	64580	41843	35396	46308	56256	29401	41416	18368	16251	1037200	1582700	1210800	1047100	276940	226640	220780	225400	C06414	-	10243	486-74-8	-	-	--
MEDP1485	2-(2-Benzothiazolylthio)ethanol	Alcohol and amines	Alcohols	212	211.3	[M+H]+	C9H9NOS2	142080	109720	138070	149340	334080	255740	413520	392850	29697	24583	23572	23726	802920	1194300	1171200	707970	249940	255000	286590	279400	-	-	20790	4665-63-8	-	-	--
MEDP1488	SDMA	Organic acid And Its derivatives	Organic acid And Its derivatives	203	202.25	[M+H]+	C8H18N4O2	891430	864170	1086800	897600	1269400	1231400	1051100	1245700	3119300	2694800	2211800	2260500	377550	667580	600260	517570	866070	927460	947330	1112100	-	HMDB0003334	169148	30344-00-4	25682	6891	--
MEDP1490	Cis-4-Hydroxy-D-Proline	Amino acid and Its metabolomics	Amino acid derivatives	132	131.058	[M+H]+	C5H9NO3	9	9	9	9	9	9	9	9	4515000	4671700	4252700	4765400	9	9	9	9	1200300	1753600	1797100	1954500	C03440	HMDB0060460	440014	2584-71-6	16231	-	ko00330,ko01100
MEDP1493	N6-methyladenosine	Nucleotide And Its metabolomics	Nucleotide and Its metabolomics	282.119	281.112	[M+H]+	C11H15N5O4	921460	910720	859030	905040	464990	409480	532320	435990	455020	360290	371110	235480	354560	730110	522980	311010	438060	465530	538850	462390	-	HMDB0004044	102175	1867-73-8	21891	-	--
MEDP1494	N-Acetyl-D-Galactosamine	Alcohol and amines	Amines	222	221.09	[M+H]+	C8H15NO6	14178	30143	9660	16820	9	9	9	9	169910	213550	143430	178840	33053	81405	67671	60512	105350	100240	94597	143610	C01132	HMDB0000212	92164	1811-31-0	40356	5222	ko00052,ko01100
MEDP1506	Leu-Val	Amino acid and Its metabolomics	Small Peptide	231	230.163	[M+H]+	C11H22N2O3	52029000	58760000	50502000	69053000	98886000	92037000	139070000	116850000	172900	72252	94663	156990	530800	678620	689170	370060	20116000	27899000	27788000	22110000	-	HMDB0029131	6993116	13588-95-9	-	-	--
MEDP1507	Phe-Asn	Amino acid and Its metabolomics	Small Peptide	280	279.122	[M+H]+	C13H17N3O4	35808	19665	20009	39346	106430	59817	130560	62402	12613	4468.5	9940.8	15738	111940	561990	263370	217560	84357	81853	89546	122090	-	-	10468817	-	-	-	--
MEDP1508	Phe-Met	Amino acid and Its metabolomics	Small Peptide	297	296.119	[M+H]+	C14H20N2O3S	9	9	9	9	9	9	9	9	3355600	1084400	2077300	1607400	312620	879870	301720	393400	909820	1003300	873830	855700	-	-	7010506	15080-84-9	-	-	--
MEDP1509	Glu-Met	Amino acid and Its metabolomics	Small Peptide	279	278.094	[M+H]+	C10H18N2O5S	408710	553110	479520	492260	447530	281630	456130	512220	13707000	4282800	7429800	5369100	3450400	8756100	4268600	3324000	3939400	3924800	3441000	4076600	-	HMDB0028825	6426949	4423-22-7	73507	-	--
MEDP1511	Met-Glu	Amino acid and Its metabolomics	Small Peptide	279	278.094	[M+H]+	C10H18N2O5S	408710	553110	479520	492260	447530	281630	456130	512220	13707000	4282800	7429800	5369100	3450400	8756100	4268600	3324000	3939400	3924800	3441000	4076600	-	-	7015689	14517-44-3	-	-	--
MEDP1512	Phe-Val	Amino acid and Its metabolomics	Small Peptide	265	264.147	[M+H]+	C14H20N2O3	709690	834060	912160	921750	1628300	1528900	2741100	2626200	314570	322280	218500	218120	713640	846100	414520	464480	886960	909280	745650	801630	-	HMDB0029008	4096934	-	-	-	--
MEDP1527	Carnitine C16:2-OH Isomer 1	FA	CAR	412.306	411.298	[M+H]+	C23H41NO5	68743	58254	52239	69118	148830	126580	175720	189100	15373	5891.8	9464	13593	9	9	9	9	68677	69360	54990	59061	-	-	-	-	-	-	--
MEDP1529	Carnitine C18:1-OH	FA	CAR	442.353	441.345	[M+H]+	C25H47NO5	13113	10872	10618	11514	15796	14260	12793	18082	9	9	9	9	9	9	9	9	11268	15999	12535	7242.1	-	-	-	-	-	-	--
MEDP1585	Ala-Glu	-	-	253.061	218.09	[M+Cl]-	C8H14N2O5	186940	155880	173820	220920	213350	167140	215580	269430	10491	14163	9457.2	13873	46340	53156	49492	45582	73367	69284	75562	81408	C20958	-	128841	13187-90-1	-	-	--
MEDP1604	Indole-3-acetonitrile	-	-	157.075	156.069	[M+H]+	C10H8N2	868200	850300	875210	952560	2985900	2016600	3631200	3532500	248850	274270	354820	380650	1021600	1066300	1075400	803530	1006300	959160	1025400	820020	C02938	HMDB06524	351795	771-51-7	17566	-	ko00380,ko01100
MEDP1614	Isopentenyl pyrophosphate	-	-	515.006	246.006	[2M+Na]+	C5H12O7P2	135240000	120460000	136350000	138860000	155780000	148730000	147800000	147100000	338350	286970	390410	393970	34818000	53554000	62913000	67438000	10945000	11386000	10288000	11622000	C00129	HMDB0001347	1195	358-71-4	16584	6181	ko00900,ko01100,ko04216
MEDP1616	Pro-Ala	-	-	373.21	186.1	[2M+H]+	C8H14N2O3	9	9	9	9	9	9	9	9	2785100	2768400	3461100	2939800	9	9	9	9	1683900	2291100	2306900	2631600	-	-	6347578	6422-36-2	-	-	--
MEDP1617	L-(+)-Gulose	-	-	203.052	180.063	[M+Na]+	C6H12O6	204660	254360	225180	136470	273430	99493	177310	135430	2555700	3051400	3043800	4895100	1007900	506230	972060	1381100	1275700	1215800	2790900	1662200	C15923	-	10130220	6027-89-0	-	-	ko00053
MEDP1644	Aniline	Alcohol and amines	Amines	94.065	93.0578	[M+H]+	C6H7N	116580	103990	108140	134130	126320	106730	109080	123910	96906	75626	44961	104140	204490	230780	137480	136710	90877	86847	113940	169290	C00292	HMDB0003012	6115	62-53-3	17296	489	--
MEDP1647	2-Amino-1-phenylethanol	Alcohol and amines	Alcohols	138.091	137.084	[M+H]+	C8H11NO	21171000	15863000	22511000	18416000	23706000	15983000	22109000	20125000	64052	28888	15541	15058	41229000	69586000	62218000	54555000	11242000	15052000	18971000	21236000	C02735	HMDB0001065	1000	7568-93-6	16343	59	--
MEDP1654	1-Methyladenosine	Nucleotide And Its metabolomics	Nucleotide and Its metabolomics	282.119	281.112	[M+H]+	C11H15N5O4	921460	910720	859030	905040	464990	409480	532320	435990	455020	360290	371110	235480	354560	730110	522980	311010	438060	465530	538850	462390	C02494	-	27476	15763-06-1	-	-	--
MEDP1656	Carnitine C16-OH	FA	CAR	416.337	415.33	[M+H]+	C23H45NO5	45880	34781	41484	41422	19818	24014	37294	16793	16813	16222	17581	15624	15150	17763	13679	12494	10745	16211	10730	16108	-	HMDB0013336	71464553	195207-76-2	-	-	--
MEDP1657	PC(O-16:0/0:0)	GP	PC-O	482.36	481.353	[M+H]+	C24H52NO6P	1154100	1660500	917860	1471700	8773700	4377700	1946100	2118100	28559	20988	33494	35644	43495	57020	65224	40478	900620	882310	853510	921880	C13903	-	162126	52691-62-0	-	-	--
MEDP1658	LPC(O-18:1/0:0)	GP	LPC	508.376	507.369	[M+H]+	C26H54NO6P	663880	346370	562650	783710	1356700	902260	1325500	1617200	9	9	9	9	27302	33166	38916	20281	316110	270430	299850	230280	-	-	24779510	87907-66-2	-	-	--
MEDP1662	NE,NE,NE-TRIMETHYLLYSINE	Amino acid and Its metabolomics	Amino acid derivatives	189.159	188.153	[M+H]+	C9H20N2O2	712040	695280	711530	726830	750600	685980	816880	692920	6135500	5180100	5423500	4854000	3613700	4551200	4463200	4318300	2798100	3297500	2784100	3430500	C03793	-	40120	-	-	-	ko00310,ko01100
MEDP1663	N,N-Dimethylarginine	Amino acid and Its metabolomics	Amino acid derivatives	203.15	202.143	[M+H]+	C8H18N4O2	954190	629710	933430	834570	1200300	1492000	1291800	933690	3136300	3222400	4381000	3352200	748480	954340	671000	731600	1253600	1035600	714570	1288400	C03626	HMDB0001539	123831	30315-93-6	17929	6309	--
MEDP1664	Glu-Leu-Arg	Amino acid and Its metabolomics	Small Peptide	417.245	416.238	[M+H]+	C17H32N6O6	9	9	9	9	9	9	9	9	877640	971930	911130	946200	35779	57911	45439	37374	359150	326100	537420	414270	-	-	-	-	-	-	--
MEDP1666	Leu-Val-Ser	Amino acid and Its metabolomics	Small Peptide	318.202	317.195	[M+H]+	C14H27N3O5	1608600	1829200	1631900	1483400	1878600	1353100	2091800	2177800	1279000	980940	1343700	1369300	264320	439000	324770	221080	955490	1046600	1131300	1122000	-	-	-	-	-	-	--
MEDP1667	Phe -Glu	Amino acid and Its metabolomics	Small Peptide	295.127	294.122	[M+H]+	C14H18N2O5	2012500	2266300	1878300	1866900	2404000	1516900	2218000	2618300	81263	78959	91196	122110	152560	461330	253330	244530	729070	768790	680810	755750	-	-	151134	3617-45-6	-	-	--
MEDP1668	Leu-Ala-Val	Amino acid and Its metabolomics	Small Peptide	302.207	301.2	[M+H]+	C14H27N3O4	223390	246340	187120	292540	418100	227510	557220	402140	9	9	9	9	9	9	9	9	227130	212390	178200	218110	-	-	-	-	-	-	--
MEDP1670	Gly-Gly-Phe	Amino acid and Its metabolomics	Small Peptide	280.129	279.122	[M+H]+	C13H17N3O4	426030	346240	377620	218230	203230	247050	222440	304710	104800	110170	74967	159280	50246	80770	43419	52518	134290	127720	199140	111010	-	-	6993373	6234-26-0	-	-	--
MEDP1671	Glu Glu Ile	Amino acid and Its metabolomics	Small Peptide	390.185	389.18	[M+H]+	C16H27N3O8	1438900	1476600	1654000	1751700	1344900	1305600	1358300	1430100	182750	159380	185780	205050	94519	188790	306680	146230	477880	553890	496610	511640	-	-	-	-	-	-	--
MEDP1672	Leu-Leu-Glu	Amino acid and Its metabolomics	Small Peptide	374.228	373.221	[M+H]+	C17H31N3O6	56207	74259	47543	82508	147790	47902	223590	125680	36612	45994	30159	29262	95514	93561	55605	51999	118840	118050	89905	68662	-	-	484684	20274-83-3	-	-	--
MEDP1673	Ile-Ile-Thr	Amino acid and Its metabolomics	Small Peptide	346.232	345.226	[M+H]+	C16H31N3O5	9	9	9	9	9	9	9	783180	707350	377780	586540	515910	64494	87359	38486	23350	207620	214940	168550	225670	-	-	-	-	-	-	--
MEDP1674	Val-Val-Val	Amino acid and Its metabolomics	Small Peptide	316.222	315.216	[M+H]+	C15H29N3O4	9	9	9	9	9	9	9	9	310750	239930	268270	180830	415760	510480	414200	360070	115030	153970	208900	195380	-	-	7015201	185350-24-7	-	-	--
MEDP1680	Thr-Leu-Ile	Amino acid and Its metabolomics	Small Peptide	346.233	345.226	[M+H]+	C16H31N3O5	41500	55407	39701	45669	65605	41577	73207	31079	111530	133210	134020	104400	110890	74187	57327	67400	59443	69876	94935	50294	-	-	-	-	-	-	--
MEDP1685	Phytosphingosine	SL	SM	318.3	317.293	[M+H]+	C18H39NO3	9	9	9	9	9	9	9	9	137170	143170	178080	174930	22122	40409	38172	37850	104990	102340	90630	117250	C12144	HMDB0004610	122121	554-62-1	46961	7066	ko00600,ko01100
MEDP1686	LPE(15:0/0:0)	GP	LPC	440.277	439.27	[M+H]+	C20H42NO7P	9812300	9556100	8412700	11249000	7180100	7292500	9586800	10335000	656940	426460	585560	658180	178760	351270	252450	280920	5361800	6164400	5411000	6177600	-	HMDB0011502	52925150	-	-	-	--
MEDP1691	LPC(0:0/17:0)	GP	LPC	510.353	509.348	[M+H]+	C25H52NO7P	7690400	8194400	7554800	7769300	8327300	8347200	7793900	8778700	8278100	7497100	8032400	8010200	8540700	8384100	8726100	8892700	8377500	8442500	9003100	9335300	-	-	-	-	-	-	--
MEDP1692	LPC(0:0/15:0)	GP	LPC	482.322	481.317	[M+H]+	C23H48NO7P	348170	263590	260870	345280	804680	767180	628030	592390	4287.1	11636	15655	10195	21159	17515	21000	15506	146310	156890	197540	187470	-	-	-	108273-89-8	-	-	--
MEDP1699	LPC(0:0/16:1)	GP	LPC	494.315	493.317	[M+H]+	C24H48NO7P	248980	223690	203470	326710	1082200	710590	990340	1124700	7972.9	6071.4	5724.9	4010.1	3765.3	4995.2	4740.2	2569.2	310240	297140	305300	270850	-	-	-	-	-	-	--
MEDP1700	LPC(0:0/18:0)	GP	LPC	524.363	523.364	[M+H]+	C26H54NO7P	2669500	2380300	2059000	2359700	7237700	5262200	8721700	8193700	845180	752470	960740	903570	826190	849610	847250	971550	2114200	2007900	1992900	2444900	-	-	-	-	-	-	--
MEDP1701	LPC(0:0/18:1)	GP	LPC	522.347	521.348	[M+H]+	C26H52NO7P	3118700	2080300	2613100	3561300	8718100	7037700	9334500	9168700	92442	44385	59064	32404	49795	106570	103890	42465	2738700	2482100	2614600	2534900	-	-	-	-	-	-	--
MEDP1703	Methyldopa	Amino acid and Its metabolomics	Amino acid derivatives	212.1	211.21	[M+H]+	C10H13NO4	41564	35745	50267	65352	22536	44234	37768	14794	100270	84100	53817	146100	29291	21078	28618	30659	32239	70548	53044	47049	-	HMDB0011754	38853	555-30-6	61058	-	--
MEDP1705	(E)-Guggulsterone	CoEnzyme and vitamins	CoEnzyme and vitamins	313.217	312.209	[M+H]+	C21H28O2	625270	535440	466060	682180	724690	776790	955110	916910	34372	38776	20770	43971	137750	175470	160340	143210	382840	439170	462600	436620	-	-	6439929	39025-24-6	-	-	--
MEDP1706	(Z)-Guggulsterone	CoEnzyme and vitamins	CoEnzyme and vitamins	313.217	312.209	[M+H]+	C21H28O2	379000	320420	287510	323300	473830	495120	626080	683970	48932	42292	30388	72396	73031	149960	89347	75188	356760	374130	393830	369730	-	-	6450278	95975-55-6	-	-	--
MEDP1712	1-Methylguanosine	Nucleotide And Its metabolomics	Nucleotide and Its metabolomics	298.114	297.107	[M+H]+	C11H15N5O5	1219100	1391200	965800	1130700	397310	301610	378500	458560	1279200	806860	1011900	1263000	2528800	3628100	2679700	1959500	1352200	1303000	1369000	1482700	-	HMDB0001563	96373	2140-65-0	19062	6324	--
MEDP1713	1-Methylinosine	Nucleotide And Its metabolomics	Nucleotide and Its metabolomics	283.104	282.096	[M+H]+	C11H14N4O5	78136	79677	78480	86112	36684	26897	42919	40951	59594	41787	34010	47702	103500	290690	133130	137220	70757	109440	133680	137850	C12317	HMDB0002721	65095	2140-73-0	19065	3780	--
MEDP1714	2'-Deoxyadenosine	Nucleotide And Its metabolomics	Nucleotide and Its metabolomics	270.968	269.112	[M+H]+	C10H15N5O4	2014400	1677000	1696100	1576600	1438500	1686800	1471500	1716500	1211900	1500200	1244200	1173200	1214800	1409900	1522300	1813800	1970500	1300100	863460	1565300	C03363	HMDB0000101	9549172	16373-93-6	17256	3382	--
MEDP1719	2'-O-methylguanosine	Nucleotide And Its metabolomics	Nucleotide and Its metabolomics	298.114	297.107	[M+H]+	C11H15N5O5	1219100	1391200	965800	1130700	397310	301610	378500	458560	1279200	806860	1011900	1263000	2528800	3628100	2679700	1959500	1352200	1303000	1369000	1482700	-	-	135406950	2140-71-8	-	-	--
MEDP1720	2-Phenylglycine	Amino acid and Its metabolomics	Amino acid derivatives	152.065	151.063	[M+H]+	C8H9NO2	67008	41461	82755	59967	57642	31414	38592	37751	108940	67539	115710	132160	556830	1058100	738020	964650	278760	312170	282100	322730	-	HMDB0002210	3866	2835-06-5	55484	6549	--
MEDP1723	3-Amino-2-piperidinone	Heterocyclic compounds	Heterocyclic compounds	115.086	114.079	[M+H]+	C5H10N2O	1589100	1569800	1843200	1841600	1979600	1790700	1865500	1530700	195940	192730	285590	236370	2134200	2018100	1760500	2038000	1059100	740140	872300	1026400	C00182	HMDB0000323	5200225	1892-22-4	76341	5312	ko04922
MEDP1724	3-Amino-4-methylpentanoic acid	Organic acid And Its derivatives	Organic acid And Its derivatives	132.102	131.095	[M+H]+	C6H13NO2	261440	230580	307960	230160	254270	181030	354210	289170	125280	99240	102890	111490	327680	302160	242890	262400	235330	156430	226590	150510	-	HMDB0003640	193411	5699-54-7	86261	-	--
MEDP1735	2,6-Diamino-5-hydroxyhexanoic acid	Amino acid and Its metabolomics	Amino acid derivatives	163.108	162.1	[M+H]+	C6H14N2O3	9	10649	9	9	12211	6439.2	7373.2	15784	1908900	1890000	2265800	2829400	16063	27655	15442	20843	844750	604770	813350	730800	C16741	-	1029	13204-98-3	-	-	ko00310,ko01100
MEDP1740	Acrylamide	Alcohol and amines	Amines	72.043	71.0371	[M+H]+	C3H5NO	945000	976260	1335200	805050	941890	756200	712740	1169000	146580	155440	155380	137390	1513400	2669700	1277300	1565700	625310	659780	651230	676500	C01659	HMDB0004296	6579	79-06-1	28619	-	--
MEDP1741	Agmatine	Alcohol and amines	Polyamines	131.129	130.122	[M+H]+	C5H14N4	574700	500990	551180	610170	431280	637340	501980	332810	1187100	1509400	1779300	1428500	8040500	4333100	6308400	8790400	3370600	2563700	2708200	3518500	C00179	HMDB0001432	199	306-60-5	17431	3523	ko00330,ko01100
MEDP1742	Ala-Phe	Amino acid and Its metabolomics	Small Peptide	237.124	236.116	[M+H]+	C12H16N2O3	751800	1154000	1060900	1373500	3363900	2310900	3414300	2756400	73337	21556	38660	35740	193420	51849	61532	43106	569380	456990	592520	603210	C05770	HMDB0028694	96814	3061-90-3	73807	-	ko00860,ko01100
MEDP1744	Astaxanthin	Others	Others	597.01	596.387	[M+H]+	C40H52O4	152820	169160	168630	146270	176880	164610	184430	155590	214600	214940	223040	204180	237240	233690	229910	209570	208570	210680	223550	259050	C08580	HMDB0002204	5281224	472-61-7	40968	3671	--
MEDP1748	Cyromazine	Heterocyclic compounds	Heterocyclic compounds	167.104	166.097	[M+H]+	C6H10N6	170490	121180	110470	117310	54774	53595	80986	85876	15233	17450	15508	13335	91261	101130	86207	79070	76224	49858	82931	55848	-	HMDB0029862	47866	66215-27-8	30260	-	--
MEDP1749	Cytidine-5'-diphosphate	Nucleotide And Its metabolomics	Nucleotide and Its metabolomics	426.986	403.018	[M+Na]+	C9H15N3O11P2	3668200	4545300	4740300	3573600	3194000	4461100	4534800	3027100	1409500	1487900	1817400	1494200	6767300	6743500	6994500	6955800	3271000	3760300	3590900	4959500	-	-	6132	63-38-7	-	-	--
MEDP1750	L-Allothreonine	Amino acid and Its metabolomics	Amino acid derivatives	120.065	119.058	[M+H]+	C4H9NO3	824100	722770	886090	796420	468160	782890	481570	547800	93580	125290	110670	89044	98978	144770	23325	34615	223770	174800	185840	207130	-	HMDB0004041	99289	28954-12-3	28718	7007	--
MEDP1753	D-Glucosaminic acid	Carboxylic acids and derivatives	Sugar acids	196.082	195.074	[M+H]+	C6H13NO6	124040	58467	100190	42988	26608	67246	94607	102260	36222	20526	25479	26887	84876	143680	57581	107150	43879	89338	74549	27768	C03752	-	73563	3646-68-2	-	-	ko00030
MEDP1764	Harmaline	Benzene and substituted derivatives	Benzene and substituted derivatives	215.12	214.111	[M+H]+	C13H14N2O	19031	23508	16869	21489	8257.4	9665	6644.3	9116.1	208450	204520	206510	169020	539280	655500	500310	673340	204180	207880	216810	245840	C06536	HMDB0030310	3564	304-21-2	28172	-	--
MEDP1766	Val-Tyr	Amino acid and Its metabolomics	Small Peptide	281.16	280.142	[M+H]+	C14H20N2O4	207920	310160	118740	367550	1539100	771860	2188300	1449800	28602	19543	21767	11487	9	76286	25048	51112	277750	296860	266270	288640	-	-	7009555	3061-91-4	-	-	--
MEDP1770	Jasmone	Aldehyde,Ketones,Esters	Ketones	165.128	164.12	[M+H]+	C11H16O	69670	37527	70876	38224	42726	24955	30444	36348	35933	23669	32198	41624	14626	35698	40730	25960	26880	25712	34274	21995	C08490	HMDB0035601	1549018	488-10-8	-	-	--
MEDP1771	Ala-gln	Amino acid and Its metabolomics	Small Peptide	218.115	217.106	[M+H]+	C8H15N3O4	40129	56154	108570	45237	107820	115730	100180	123910	21571	17253	23852	27684	9	9	9	9	22627	14218	15195	30598	-	HMDB0028685	123935	39537-23-0	73788	-	--
MEDP1777	L-Methionine sulfoxide	Amino acid and Its metabolomics	Amino acid derivatives	166.053	165.046	[M+H]+	C5H11NO3S	1219700	1009800	896050	967890	446070	979020	1173600	514450	59332	131050	53383	106120	37970	77786	17479	48913	159960	155620	187700	201080	-	HMDB0002005	158980	3226-65-1	17016	6428	--
MEDP1778	L-Norvaline	Amino acid and Its metabolomics	Amino acids	118.087	117.079	[M+H]+	C5H11NO2	54210000	55213000	57986000	47669000	46699000	46279000	48231000	52430000	7523900	8349000	9679200	8547100	70999000	103400000	76871000	79395000	33346000	37808000	38809000	34335000	C01826	-	65098	6600-40-4	-	-	--
MEDP1786	N1,N8-diacetylspermidine	Heterocyclic compounds	Heterocyclic compounds	230.18	229.179	[M+H]+	C11H23N3O2	167180	220460	170600	254180	62182	114370	98006	107970	298600	352740	333910	235730	5934700	6885400	6054600	6567900	1586400	1497900	1677000	1809600	-	HMDB0041947	389613	82414-35-5	-	-	--
MEDP1788	N4-Acetylcytidine triphosphate	Nucleotide And Its metabolomics	Nucleotide and Its metabolomics	526.431	524.995	[M+H]+	C11H18N3O15P3	3400800	3468300	2900200	3407500	3556000	3540700	3167100	3039000	3209500	4057500	2954800	3399000	3291500	2836000	2959600	3365800	2694300	2877900	2864800	4251300	-	-	90117875	-	-	-	--
MEDP1789	N6-methyl-2'-deoxyadenosine	Nucleotide And Its metabolomics	Nucleotide and Its metabolomics	266.125	265.117	[M+H]+	C11H15N5O3	21197	15065	7848.5	14225	14737	8947.8	9	9	86841	71870	33583	28466	9	9	9	50116	135920	118640	155030	137760	C03795	-	168948	2002-35-9	-	-	--
MEDP1791	Nicotinamide riboside (chloride)	Nucleotide And Its metabolomics	Nucleotide and Its metabolomics	255.097	290.067	[M-Cl]+	C11H15ClN2O5	36422	47714	51935	27163	7639.5	17730	6397.4	21674	3868500	3193500	1458900	3014300	1409100	1183400	2255200	1618400	1351500	2701200	2403100	2306700	-	HMDB0000855	90480033	23111-00-4	15927	5818	--
MEDP1795	Palmitoylethanolamide（(PEA）	Alcohol and amines	Amines	300.291	299.5	[M+H]+	C18H37NO2	134210	139480	156410	207680	312470	216300	370460	317040	121300	94410	138090	143000	1674400	2776600	2272100	1743900	580510	604760	514790	611270	C16512	HMDB0002100	4671	544-31-0	71464	-	ko04080
MEDP1802	Stachydrine	Organic acid And Its derivatives	Organic acid And Its derivatives	144.106	143.095	[M+H]+	C7H13NO2	73095	48398	143380	54614	22321	43732	37051	27008	169290	208360	211080	127220	117400	140490	97704	125210	97867	140020	196350	146650	C10172	HMDB0004827	115244	471-87-4	35280	7089	--
MEDP1829	Cyperotundone	Aldehyde,Ketones,Esters	Ketones	219.017	218.33	[M+H]+	C15H22O	65194	87320	80474	90917	93979	111710	69574	81868	100600	94320	135270	103020	88681	103330	104610	87249	102220	113750	121170	139790	-	-	12308614	3466-15-7	-	-	--
MEDP1836	Nootkatone	Aldehyde,Ketones,Esters	Ketones	219.176	218.335	[M+H]+	C15H22O	19391	24725	31176	24756	18838	40998	22951	31111	22448	30720	41469	36368	25580	19538	34460	26536	31774	36274	44435	47502	C17914	-	1268142	4674-50-4	-	-	--
MEDP1841	Zerumbone	Aldehyde,Ketones,Esters	Ketones	219.177	218.33	[M+H]+	C15H22O	99388	75473	73758	79591	103520	112260	81825	95411	128440	140640	135170	113940	122540	112270	129540	140430	129170	139270	109880	133940	C20262	-	5470187	471-05-6	-	-	--
MEDP1844	alpha-D-Glucopyranoside, beta-D-fructofuranosyl	Carboxylic acids and derivatives	Sugars	343.123	342.116	[M+H]+	C12H22O11	2569.4	2252.5	5898.5	9	20475	16065	14971	17784	247960	180640	57042	160520	2252.5	8979.3	4083.5	1671.3	16515	13041	22769	15045	-	-	1115	1192061-43-0	-	-	--
MEDP1850	Arg-Leu	Amino acid and Its metabolomics	Small Peptide	288.202	345.224	[M+H]+	C12H25N5O3	230050	216820	162080	257970	410460	264750	342800	227560	1222500	921770	919750	1266400	260760	362590	378030	378320	551140	549690	473620	645390	-	HMDB0028713	6992563	1188-24-5	73815	-	--
MEDP1851	Asp-Tyr	Amino acid and Its metabolomics	Small Peptide	297.108	296.101	[M+H]+	C13H16N2O6	9	9360	6293.9	9	27742	37925	9	9	123680	83491	95258	179610	198250	325880	231470	136120	72344	85876	83315	101600	-	HMDB0028765	152455	22840-03-5	-	-	--
MEDP1855	DL-Aminopimelic acid	Organic acid And Its derivatives	Organic acid And Its derivatives	176.091	175.084	[M+H]+	C7H13NO4	228720	189470	225190	217540	165830	80080	209240	178060	190400	230180	280370	379110	11383000	18732000	11043000	11398000	2212700	1838500	1601900	2627400	-	HMDB0034252	101122	627-76-9	64305	-	--
MEDP1857	Eicosanoyl-EA	Organic acid And Its derivatives	Organic acid And Its derivatives	356.352	355.345	[M+H]+	C22H45NO2	19032000	27048000	22893000	30066000	9212000	11258000	36328000	10212000	9436200	10482000	13356000	9581200	8692400	5931200	7967000	9908900	13411000	14920000	16236000	18317000	-	-	3787294	94421-69-9	-	-	--
MEDP1859	Gln-Phe	Amino acid and Its metabolomics	Small Peptide	276.13	293.138	[M-H2O+H]+	C14H19N3O4	28649000	28702000	26979000	30465000	27049000	22852000	30252000	28215000	465650	558620	732520	665320	26567000	31502000	30783000	24282000	12862000	12344000	12638000	12925000	-	HMDB0028804	57288566	92327-75-8	-	-	--
MEDP1860	Glu-Leu	Amino acid and Its metabolomics	Small Peptide	261.143	260.137	[M+H]+	C11H20N2O5	691850	782330	819240	846620	635470	524640	796650	787360	49105000	22408000	28877000	25181000	6191000	12523000	8574600	7933700	10576000	13308000	11179000	12285000	-	HMDB0028823	4524287	2566-39-4	73506	-	--
MEDP1861	Glu-Tyr	Amino acid and Its metabolomics	Small Peptide	311.123	310.116	[M+H]+	C14H18N2O6	156340	174020	140890	87411	151630	106260	131370	104160	9772500	5111600	8380800	8356100	1828500	4605800	1858900	1834700	3528600	3647400	4768600	5530700	-	HMDB0028831	515717	3422-39-7	73513	-	--
MEDP1863	Gly-His	Amino acid and Its metabolomics	Small Peptide	195.084	212.091	[M+H-H2O]+	C8H12N4O3	155030	97757	113120	135130	103290	138180	80389	107540	468990	478230	610560	513770	25203	86152	32710	23358	242300	221450	215280	270070	-	HMDB0028843	417360	-	-	-	--
MEDP1868	Gly-Tyr	Amino acid and Its metabolomics	Small Peptide	239.098	364.064	[M+H]+	C11H14N2O4	8597000	9045000	8930700	8774300	9782200	7956100	11581000	10604000	37309	52586	30115	37517	44830	43280	32856	43771	3030800	2623000	3264300	3316800	-	HMDB0028853	92829	658-79-7	73517	-	--
MEDP1869	His-Leu	Amino acid and Its metabolomics	Small Peptide	251.15	261.143	[M+H-H2O]+	C12H20N4O3	3974400	6158700	3958300	6164000	4834700	5060500	7253800	5465000	111190	200980	186420	131120	5351500	6618900	7685400	4382200	1893400	2267400	2874800	2678900	C05010	HMDB0028889	189008	7763-65-7	-	-	--
MEDP1870	Ile-Lys	Amino acid and Its metabolomics	Small Peptide	260.195	259.19	[M+H]+	C12H25N3O3	8942400	9200700	6681400	9134300	14586000	13215000	23770000	20384000	2260700	1994000	2189000	2686100	5513500	8307100	6447600	6954000	5572700	7517100	7352500	6843400	-	HMDB0028912	44298547	-	-	-	--
MEDP1871	Ile-Met	Amino acid and Its metabolomics	Small Peptide	263.149	262.135	[M+H]+	C11H22N2O3S1	9	9	9	9	9	9	9	9	671710	327280	418650	356860	104260	240680	226370	158720	187110	242490	168200	182360	-	HMDB0028913	7020106	42384-14-5	-	-	--
MEDP1873	Leu-Pro-Tyr	Amino acid and Its metabolomics	Small Peptide	392.212	391.211	[M+H]+	C20H29N3O5	18620000	17254000	16298000	20376000	15096000	14459000	14726000	17201000	69396	54946	54605	58175	431800	928360	1521900	736860	5183600	4697500	5929200	6574200	-	HMDB0007179	11234718	65886-80-8	77129	-	--
MEDP1875	LPE(17:1/0:0)	GP	LPE	466.285	465.286	[M+H]+	C22H44NO7P	13379000	13546000	12331000	15085000	9197600	8488800	10195000	9596700	466900	221810	228650	306010	3613700	4494900	3715200	3730200	7736800	8069800	8021800	10321000	-	-	42607464	-	-	-	--
MEDP1876	Methyl nicotinic acid	CoEnzyme and vitamins	CoEnzyme and vitamins	138.053	137.048	[M+H]+	C7H7NO2	9	9	9	9	9	9	9	9	539050	400300	821820	512170	1466600	2728000	1201800	1120900	835040	939110	779570	902850	D04991	HMDB0029806	7151	93-60-7	451700	-	--
MEDP1882	Phe-Leu	Amino acid and Its metabolomics	Small Peptide	261.16	251.15	[M+H-H2O]+	C15H22N2O3	1151700	1221000	1145200	1253900	1324000	898090	1239100	1355300	18558	14904	20527	19939	504000	507020	523410	340320	397750	429850	455290	457080	-	-	-	3303-55-7	-	-	--
MEDP1884	Pro-His	Amino acid and Its metabolomics	Small Peptide	235.117	252.122	[M+H-H2O]+	C11H16N4O3	26635000	26654000	28020000	30869000	27111000	22677000	29804000	27425000	1358900	1053400	1155400	1421200	23476000	23647000	27055000	19667000	10820000	9778700	12931000	12970000	-	HMDB0029019	18218235	100896-87-5	-	-	--
MEDP1885	Pro-Ile	Amino acid and Its metabolomics	Small Peptide	211.14	228.147	[M+H-H2O]+	C11H20N2O3	1663200	1673800	1823200	2047700	1916600	1486000	1819700	1576400	243880	242920	302760	298690	2494100	3689300	3269600	2354700	1149700	1130100	1244000	1290500	-	-	7079600	-	-	-	--
MEDP1886	Pro-Val	Amino acid and Its metabolomics	Small Peptide	215.139	214.132	[M+H]+	C10H18N2O3	4642800	4838600	5400100	4653200	5924700	4786400	5725300	4190100	227350	256050	279090	340560	821660	2145200	1817600	1377500	1747100	1504300	1516400	1997800	-	HMDB0029030	152307	20488-27-1	-	-	--
MEDP1888	Ser-Leu	Amino acid and Its metabolomics	Small Peptide	219.133	233.149	[M+H]+	C9H18N2O4	466140	507590	562660	623560	544750	428090	453990	504650	8885300	7799100	8847100	10061000	23297000	26429000	22131000	18963000	8603300	8557500	9679500	9579300	-	HMDB0029043	7015695	6665-16-3	74815	-	--
MEDP1889	Ser-Phe	Amino acid and Its metabolomics	Small Peptide	253.118	522.357	[M+H]+	C12H16N2O4	646090	488380	465590	572950	405430	337600	550840	690440	94729	137630	124330	176800	2767000	2567900	2068700	1782400	636590	588830	614510	772760	-	HMDB0029046	7009598	16875-28-8	71029	-	--
MEDP1894	Tyr-Leu	Amino acid and Its metabolomics	Small Peptide	295.161	294.158	[M+H]+	C15H22N2O4	390840	666040	530060	660640	3228100	1398200	3885400	2718100	131880	81583	46835	89746	124290	264550	95737	141810	534100	501790	614070	580550	-	HMDB0029109	87071	17355-10-1	-	-	--
MEDP1895	Tyr-Phe	Amino acid and Its metabolomics	Small Peptide	311.139	311.139	[M+H-H2O]+	C18H20N2O4	1491300	1369600	1444700	1727000	1523800	1166300	1579000	1742700	26105	26004	28463	22723	413300	494110	504400	330540	630540	598570	575880	593350	-	HMDB0029112	3421919	17355-11-2	-	-	--
MEDP1897	2-Hydroxy-2-methylbutanenitrile	Others	Others	100.075	99.0684	[M+H]+	C5H9NO	115160	78026	119750	107150	57380	73820	106240	86190	85059	85563	73421	87135	144920	197870	243500	190810	131970	89628	116320	114030	C11118	HMDB0060309	97823	4111-08-4	60908	-	--
MEDP1898	3-Hydroxyphenylurea	Benzene and substituted derivatives	Benzene and substituted derivatives	153.065	152.059	[M+H]+	C7H8N2O2	4094500	4056300	4187000	3840000	5098100	5213100	4897200	4143900	5294200	5404600	5939500	5280200	3183000	3270900	3719100	3570800	4253500	3850200	4268400	4718300	C05842	-	12796	701-82-6	-	-	ko00760,ko01100
MEDP1900	Caffeine	Heterocyclic compounds	Heterocyclic compounds	195.088	194.08	[M+H]+	C8H10N4O2	29550	21524	41325	43229	45183	14980	44530	26124	33358	36402	28445	25592	33039	35725	81738	43579	32470	40700	44181	53146	C07481	HMDB0001847	2519	58-08-2	27732	1455	ko00232,ko01100
MEDP1903	LPE(0:0/20:4)	GP	LPE	544.331	543.332	[M+H]+	C28H50NO7P	9	9	9	9	9	9	9	9	303870	379340	374250	500300	138050	159260	198380	113030	89579	146580	118100	234170	-	HMDB0011487	53480936	83799-24-0	72741	-	--
MEDP1904	LPE(18:2/0:0)	GP	LPE	478.325	477.286	[M+H]+	C23H44NO7P	1492100	1085200	784340	1344700	15087000	11018000	10998000	22241000	458840	346340	548650	545290	32239	9	9	9	13259000	11611000	10434000	9216900	-	HMDB0011517	42607465	652149-09-2	64395	-	--
MEDP1913	N(Alpha)-Acetyl-Epsilon-(2-Propenal)Lysine	Amino acid and Its metabolomics	Small Peptide	243.13	242.127	[M+H]+	C11H18N2O4	11676000	14125000	14167000	11307000	15186000	11496000	14193000	14560000	972660	892650	1149400	1295200	16409000	24968000	21520000	16601000	7356400	8088600	8199400	7868900	-	-	6438822	99124-74-0	-	-	--
MEDP1914	N-(1-Deoxy-1-fructosyl)phenylalanine	Amino acid and Its metabolomics	Amino acid derivatives	358	327.131	[M+H]+	C15H21NO7	49922	45878	66607	35509	51552	43426	55214	62126	60222	71070	37969	44808	68814	46621	62247	59941	21538	22877	25769	29674	-	HMDB0037846	101039148	87251-83-0	-	-	--
MEDP1916	N-Acetyl-L-phenylalanine	Amino acid and Its metabolomics	Amino acid derivatives	208.095	207.1	[M+H]+	C11H13NO3	768350	790620	801880	862720	794130	597220	813860	855290	408940	551740	639570	508730	5350400	7120700	4661600	5158100	1277700	1402200	1629400	1529200	C03519	HMDB0000512	74839	2018-61-3	16259	5498	ko00360,ko01100
MEDP1918	Farnesylacetone	Aldehyde,Ketones,Esters	Ketones	263	262.4	[M+H]+	C18H30O	242620	139170	139480	39599	67454	89467	251560	246890	227050	158040	91866	70000	40249	70633	278190	175470	53963	50380	50682	52872	-	-	1711945	-	-	-	--
MEDP1919	Cyclo(Pro-Leu)	Amino acid and Its metabolomics	Small Peptide	211	210.27	[M+H]+	C11H18N2O2	7047700	7275600	7048200	7952300	6950100	6280900	7980100	8014500	419750	332220	491170	414520	7357100	9334500	9070500	6862300	3169900	3935300	3216300	4483300	-	HMDB0034276	102892	2873-36-1	133094	-	--
MEDP1923	Cyclo(Phe-Glu)	Amino acid and Its metabolomics	Small Peptide	277.119	276.112	[M+H]+	C14H16N2O4	566000	574600	552520	484650	565810	511670	621200	613130	59352	103720	110160	95479	642290	733430	701870	582620	277800	394850	349880	348220	-	-	-	-	-	-	--
MEDP1924	Cyclo(Pro-Glu)	Amino acid and Its metabolomics	Small Peptide	227.09	227.103	[M+H]+	C10H14N2O4	748040	866380	892630	941410	1050000	679780	969990	886860	261160	188250	291010	215570	1031700	1293900	1220700	958810	603610	587390	542690	677340	-	-	-	-	-	-	--
MEDP1926	Cyclo(Pro-Phe)	Amino acid and Its metabolomics	Small Peptide	245.12	245.128	[M+H]+	C14H16N2O2	10079000	10600000	10483000	11926000	10679000	9118200	11057000	11884000	490040	500610	536560	588790	7937800	9978400	9142600	6781400	5828900	5565300	5966500	5473500	C11847	-	-	3705-26-8	-	-	--
MEDP1927	Cyclo(Pro-Pro)	Amino acid and Its metabolomics	Small Peptide	195.113	194.106	[M+H]+	C10H14N2O2	980400	962640	998340	838890	949320	858510	1023900	795620	699120	682140	701650	749240	1405400	1425900	1318800	1225100	972080	917070	967030	1062900	-	-	-	6708-06-1	-	-	--
MEDP1928	Cyclo(Pro-Val)	Amino acid and Its metabolomics	Small Peptide	197.129	196.122	[M+H]+	C10H16N2O2	10098000	13282000	13076000	12623000	13840000	13086000	13349000	14594000	768890	682140	723340	800570	14697000	17974000	15060000	14368000	6083200	7191500	6408800	6984500	-	-	-	5654-87-5	-	-	--
MEDP1929	Cyclo(Ser-Pro)	Amino acid and Its metabolomics	Small Peptide	185.093	184.086	[M+H]+	C8H12N2O3	11075000	11818000	11702000	13896000	15199000	11672000	12191000	10394000	1030200	1168600	1158600	1168500	13782000	12402000	14914000	13884000	7226100	6644200	5372600	7026200	-	-	-	-	-	-	--
MEDP1930	Cyclo(Tyr-Ala)	Amino acid and Its metabolomics	Small Peptide	235.108	234.1	[M+H]+	C12H14N2O3	2755600	2353400	2708100	2720300	2633300	2626400	2596300	2755300	152800	163920	161300	142490	3443600	3487200	3546000	2521600	1442900	1158700	1571200	1334700	-	-	-	21754-26-7	-	-	--
MEDP1931	Cyclo(Tyr-Leu)	Amino acid and Its metabolomics	Small Peptide	261.16	260.152	[M+H]+	C15H20N2O2	1210900	1076500	965210	1375300	1376000	991420	1300300	1354000	28291	26201	27284	25240	568550	540410	614190	389490	473910	444140	441260	436640	-	-	-	82863-65-8	-	-	--
MEDP1932	Cyclo(Val-Ala)	Amino acid and Its metabolomics	Small Peptide	171.113	170.105	[M+H]+	C8H14N2O2	1027600	879580	984740	1065600	1101500	1061100	1028400	1043000	181760	169650	163710	163320	636680	778330	717890	725520	581490	461130	477470	587030	-	-	-	15136-27-3	-	-	--
MEDP1933	Cyclopentylglycine	Amino acid and Its metabolomics	Amino acid derivatives	144.098	143.095	[M+H]+	C7H13NO2	9	9	9	9	9	9	9	9	133940	95001	87229	120560	1365200	1619800	1250300	1488100	549350	483320	569550	677190	-	-	-	2521-84-8	-	-	--
MEDP1935	Ile-Asp	Amino acid and Its metabolomics	Small Peptide	247.129	246.121	[M+H]+	C10H18N2O5	10563	21226	26784	5355.4	9	9	9	9	536680	588400	465580	637450	826830	1310700	1151400	748300	223790	299070	426360	276590	-	HMDB0028903	-	-	-	-	--
MEDP1936	L-Aspartic acid-O-diglucoside	Amino acid and Its metabolomics	Small Peptide	458.1	457.143	[M+H]+	C16H27NO14	15982	29049	23615	13344	102510	85999	77308	128040	7979	13387	35685	9379.7	19490	9648.8	18022	27343	38194	30705	39395	40602	-	-	-	-	-	-	--
MEDP1937	Leu-Leu	Amino acid and Its metabolomics	Small Peptide	245.18	245.186	[M+H]+	C12H24N2O3	218520	260090	314310	189750	147890	84428	269610	124910	146130	104580	100370	104620	224720	264740	244720	183750	218350	161850	164680	204860	-	-	-	3303-31-9	-	-	--
MEDP1942	N-MethyTrans-4-Hydroxy-Proline	Amino acid and Its metabolomics	Amino acid derivatives	146.081	145.074	[M+H]+	C6H11NO3	33827	25432	40753	19789	13338	21453	24591	24166	60998	59388	37302	51675	23525	66706	21413	34444	36453	43079	29691	26256	-	-	-	4252-82-8	-	-	--
MEDP1943	O-Acetyl-L-serine	Amino acid and Its metabolomics	Amino acid derivatives	148.06	147.053	[M+H]+	C5H9NO4	55877	43541	77048	39061	102910	136560	82591	61252	383860	342550	390160	445500	2497400	3386600	2750500	2508900	876020	942770	838800	939030	C00979	HMDB0003011	99478	5147-00-2	17981	3270	ko00270,ko00920,ko01100,ko01200,ko01230,ko04122
MEDP1945	Pro-Leu	Amino acid and Its metabolomics	Small Peptide	229.15	229.154	[M+H]+	C11H20N2O3	9912300	10331000	9770100	12102000	11012000	12406000	18938000	17108000	656020	644380	950280	825070	2626800	6180500	6425900	5523800	4539200	4856600	5544600	5621300	-	-	-	52899-07-7	-	-	--
MEDP1947	Ser-Ile	Amino acid and Its metabolomics	Small Peptide	219.135	218.127	[M+H]+	C9H18N2O4	523400	632370	524150	610330	522820	388330	478380	520140	8962700	7906600	8863500	10016000	22890000	26461000	22351000	19264000	8369900	8955600	9208900	9405600	-	-	-	91086-51-0	-	-	--
MEDP1950	2'-Deoxyinosine-5'-monophosphate	Nucleotide And Its metabolomics	Nucleotide and Its metabolomics	333.052	332.052	[M+H]+	C10H13N4O7P	24168	57731	34729	25489	7385.9	3099.3	9959.9	19421	24547000	20313000	19655000	18437000	41109	77309	108200	86962	3471000	4199800	3898500	4088800	C06196	HMDB0006555	-	3393-18-8	28806	-	ko00230
MEDP1953	Eritadenine	Heterocyclic compounds	Pteridines and derivatives	254.08	253.081	[M+H]+	C9H11N5O4	18901	27402	6509.7	25890	9	9	9	3479.6	824280	774780	813110	762920	9	9	4838	11303	247130	279100	242720	234250	-	-	-	23918-98-1	-	-	--
MEDP1954	N6-(2-Hydroxyethyl)adenosine	Nucleotide And Its metabolomics	Nucleotide and Its metabolomics	312	311.123	[M+H]+	C12H17N5O5	120960	129280	93329	139090	63232	69917	45443	53187	26778	22253	18028	27620	424290	676360	313360	253180	94978	99272	122370	141060	-	-	-	4338-48-1	-	-	--
MEDP1955	3'-Deoxyadenosine	Nucleotide And Its metabolomics	Nucleotide and Its metabolomics	252	251.102	[M+H]+	C10H13N5O3	5505000	6622600	4061500	4810200	907800	1292600	1125600	1456100	20946000	11702000	9834600	9856500	5340400	7403200	7279000	4451300	7817000	7430300	6246800	8076600	C08431	-	-	73-03-0	-	-	--
MEDP1956	2-Aminopurine	Nucleotide And Its metabolomics	Nucleotide and Its metabolomics	136.062	135.054	[M+H]+	C5H5N5	13369000	16778000	12055000	15564000	3234800	4988700	4727800	4477200	16590000	6931100	11285000	10048000	13489000	37109000	21843000	12986000	12701000	13895000	12094000	13491000	-	-	-	452-06-2	-	-	--
MEDP1958	2-Hydroxyadenosine	Nucleotide And Its metabolomics	Nucleotide and Its metabolomics	284	283.092	[M+H]+	C10H13N5O5	85480000	127150000	91588000	69686000	30579000	8456300	34533000	19259000	36732000	5926600	20715000	15220000	54576000	54425000	59280000	24062000	48244000	26896000	41959000	50439000	C08432	-	-	1818-71-9	-	-	--
MEDP1959	N6-(4-hydroxybenzyl)adnine riboside	Nucleotide And Its metabolomics	Nucleotide and Its metabolomics	242.102	241.096	[M+H]+	C12H11N5O	81160	103900	108480	102220	65468	96526	81649	71133	92368	73256	90908	80063	89130	87339	67905	79515	75871	97586	97989	41915	-	-	-	-	-	-	--
MEDP1961	Ribosyladenosine	Nucleotide And Its metabolomics	Nucleotide and Its metabolomics	400.146	399.139	[M+H]+	C15H21N5O8	11513	31899	27300	34834	9	9	9	9	60877	106050	88661	65736	91115	72514	105180	60588	83796	63443	98330	137860	-	-	-	-	-	-	--
MEDP1963	S-(Methyl)glutathione	Amino acid and Its metabolomics	Amino acid derivatives	322.107	321.099	[M+H]+	C11H19N3O6S	35948	41682	39105	20938	27127	20954	31987	41950	336590	109760	168440	135590	104500	87464	101290	83244	83625	76289	58710	98971	C11347	-	-	2922-56-7	-	-	--
MEDP1966	S-Allyl-L-cysteine	Amino acid and Its metabolomics	Amino acid derivatives	162.058	161.051	[M+H]+	C6H11NO2S	7049.9	2810.7	3760.2	9	9	9	9	9	351470	310040	297430	230060	681580	482260	441420	309520	184160	203490	182270	135800	C16759	-	-	21593-77-1	-	-	--
MEDP1968	L-Lysine-Butanoic Acid	Amino acid and Its metabolomics	Amino acid derivatives	235.1	234.158	[M+H]+	C10H22N2O4	15011000	13973000	15747000	12738000	13899000	15663000	16552000	13718000	34662000	45196000	22791000	35092000	209570000	170630000	165770000	193530000	112000000	119170000	126120000	140000000	-	-	-	80407-71-2	-	-	--
MEDP1970	L-Methionine methyl ester	Amino acid and Its metabolomics	Amino acid derivatives	164.074	163.067	[M+H]+	C6H13NO2S	9	9	9	9	9	9	9	9	209460	169630	201780	263840	426030	564000	701500	252730	249380	290870	219570	185890	-	-	-	10332-17-9	-	-	--
MEDP1973	D-Proline betaine	Amino acid and Its metabolomics	Amino acid derivatives	144.102	144.092	[M]+	C7H14NO2+	15283	31059	10359	16791	9	25020	9	12213	41686	67729	48348	65275	38703	51420	41069	32346	64133	41674	80015	96631	C21514	-	-	1195-94-4	-	-	--
MEDP1982	2-Methyl-1-Pyrroline	Heterocyclic compounds	Heterocyclic compounds	84.08	83.0735	[M+H]+	C5H9N	545810	533610	467170	561170	1735700	1011500	1358400	1525200	359180	388610	341020	335960	2176900	911040	902840	817140	691010	417780	569660	525550	C20808	-	70103	872-32-2	-	-	--
MEDP1986	Glu-Pro	Amino acid and Its metabolomics	Small Peptide	227.1	244.106	[M+H-H2O]+	C10H16N2O5	1580300	1500100	1582200	1618100	1818300	1542200	1534200	1264900	364520	247100	414950	510900	2000600	2527900	2136300	1732600	731250	839760	984660	1163400	-	HMDB0028827	11218768	41745-47-5	73508	-	--
MEDP1987	His-Val	Amino acid and Its metabolomics	Small Peptide	237.132	254.138	[M+H-H2O]+	C11H18N4O3	2622000	2418700	2391300	2743700	2663100	2176900	2901800	2419900	313160	311960	323640	371510	2218000	3087700	2554200	2579900	1286400	1311000	1271000	1299600	-	HMDB0028898	7021870	76019-15-3	-	-	--
MEDP1988	Hydroxyurea	Others	Others	123.043	76.0273	[M+HCOO+2H]+	CH4N2O2	2444400	2069600	1105000	1718100	783150	1724400	1874200	2276700	290020	320320	636430	255280	3339700	5657400	4200600	4153600	1913200	2071000	2026900	2354500	C07044	HMDB0015140	3657	127-07-1	44423	-	ko01100
MEDP1990	Melibiose	Carboxylic acids and derivatives	Sugars	381.078	342.116	[M+K]+	C12H22O11	179820	114950	142780	140490	89608	147580	104680	85168	77184	73656	46154	87748	166420	200190	219570	195080	146330	169250	186980	207610	C05402	HMDB0000048	440658	585-99-9	-	-	ko00052,ko01100,ko02010
MEDP1991	N6-Isopentenyladenosine	Nucleotide And Its metabolomics	Nucleotide and Its metabolomics	336.167	335.159	[M+H]+	C15H21N5O4	706020	583190	683990	738440	346960	364400	383790	423480	44325	36059	43275	45810	572460	1106600	624330	530750	344090	360900	366850	441960	-	-	24405	7724-76-7	-	-	--
MEDP1996	N-Formylglycine	Amino acid and Its metabolomics	Amino acids	104.034	103.027	[M+H]+	C3H5NO3	8268400	7804900	9231900	8057500	7897100	8794600	8542700	8686300	3951800	4878900	3104400	4448700	3241500	2819300	4355500	2633200	3148400	4830500	4413000	4376700	-	-	75606	2491-15-8	-	-	--
MEDP1998	2,3-Diaminopropionic acid	Amino acid and Its metabolomics	Amino acids	105.066	104.059	[M+H]+	C3H8N2O2	9	9	9	9	9	9	9	9	185150	223080	107690	156560	9	9	9	9	63344	90335	88867	69954	-	-	364	515-94-6	-	-	--
MEDP2001	D-Pyroglutamic acid	Amino acid and Its metabolomics	Amino acids	130.05	129.043	[M+H]+	C5H7NO3	3461900	3360200	3770000	2943500	4963100	3509300	4151200	2612300	709640	1110600	551670	889270	15454000	17655000	15812000	15915000	5438900	5382500	4641700	4173200	-	-	439685	4042-36-8	-	-	--
MEDP2002	Aminolevulinic acid	Organic acid And Its derivatives	Organic acid And Its derivatives	132.066	131.058	[M+H]+	C5H9NO3	126850	70681	79032	84411	110890	99264	84793	54068	4277900	4434700	3655900	4852900	14525	23489	8401.5	19688	1545200	1304400	1536200	1569200	-	HMDB0001149	137	5451-09-2	17549	6037	--
MEDP2003	D-Ornithine	Amino acid and Its metabolomics	Amino acids	133.097	132.09	[M+H]+	C5H12N2O2	2816900	2792200	3051600	2992100	2983700	3476800	3799700	3135800	1801400	1291500	1435700	1662500	506880	492080	614830	496320	951340	1418000	1135900	1309800	-	-	71082	348-66-3	-	-	--
MEDP2007	3-Methyloxindole	Heterocyclic compounds	Indole and Its derivatives	148.076	147.068	[M+H]+	C9H9NO	9	9	9	9	9	9	9	9	15066	32020	23431	31807	28097	33106	21067	20015	45836	54038	45246	68133	-	HMDB0004186	150923	1504-06-9	28254	7024	--
MEDP2008	2-Hydroxy-4-(methylthio)butyric acid	Organic acid And Its derivatives	Organic acid And Its derivatives	151.042	150.035	[M+H]+	C5H10O3S	35094	53597	28152	50567	38478	72285	35126	56597	36321	28764	39540	32209	32777	31423	27884	32717	38468	23987	30767	29284	-	HMDB0037115	11427	583-91-5	-	-	--
MEDP2040	Ancitabine	Heterocyclic compounds	Heterocyclic compounds	226.083	225.075	[M+H]+	C9H11N3O4	6237.9	9	9	9	3848	4386.2	8248.2	2564.7	18165	19600	5916.6	16329	11259	3114	9	11225	11221	3742	9352.5	9982.6	-	-	25051	10212-25-6	-	-	--
MEDP2047	N-Acetyl-Asp-Glu	Amino acid and Its metabolomics	Small Peptide	305.098	304.091	[M+H]+	C11H16N2O8	9	9	9	9	9	9	9	9	329230	297950	259810	390960	354180	370500	512910	401610	185180	208730	204530	248770	-	HMDB0001067	188803	3106-85-2	95120	-	--
MEDP2058	Phenethylamine	Alcohol and amines	Amines	122.1	121.089	[M+H]+	C8H11N	43793000	42389000	42985000	45391000	40733000	39365000	46263000	34234000	42929	9	9	9	81580000	114940000	113610000	99174000	22761000	24477000	30361000	28407000	C05332	HMDB0012275	1001	64-04-0	18397	-	ko00360,ko01100
MEDP2105	3,6,9,12,15,18,21-Heptaoxatricosane-21,23-diol	-	-	388.253	370.22	[M+NH4]+	C16H34O9	1347500	1307500	1389400	1165800	1403300	1272000	1597100	2029000	867950	1090800	906280	916500	973170	857360	739100	845740	544080	471850	481990	745420	-	-	-	5117-19-1	-	-	--
MW0000053	1,2,3,4-Tetrahydro-b-carboline-1,3-dicarboxylic acid	-	-	259.075	1465.1	[M-H]-	C13H12N2O4	2445600	2319300	2374000	2660900	2596500	2092600	2626600	2809500	172920	145660	159700	171390	2694400	3517200	2850300	2412800	1207600	1194200	1342900	1386400	-	HMDB0032102	151564	-	-	-	--
MW0000118	Ajmalicine	-	-	353.186	352.179	[M+H]+	C21H24N2O3	9	9	9	9	9	9	9	9	139800	162110	87714	79167	9	9	9	9	173260	165620	171450	196710	C09024	-	441975	483-04-5	-	-	ko01100
MW0000147	Berberine	-	-	336.123	336.123	[M+H]+	[C20H18NO4]+	16318	17423	20114	28376	17983	21134	17593	21078	17248	18131	22793	33281	17348	12200	17163	20200	15046	18481	18543	17127	C00757	HMDB0003409	2353	2086-83-1	16118	3471	ko04152
MW0000205	Cytochalasin A	-	-	460.243	477.252	[M+H-H2O]+	C29H35NO5	12902000	10515000	9992000	14666000	13338000	11773000	14802000	16650000	596120	402020	538420	612290	101800	160310	159010	113430	5986200	6222100	5550200	5506100	C19953	-	5458383	14110-64-6	-	-	--
MW0000206	Cytochalasin B	-	-	462.263	479.267	[M+H-H2O]+	C29H37NO5	16721	18920	16311	20666	38580	55333	64728	78634	60407	39906	47394	41693	10313	17268	12269	8688.6	158490	181720	182590	194520	C19954	-	5311281	14930-96-2	-	-	--
MW0000235	Dihydromorphine	-	-	597.285	287.152	[2M+Na]+	C17H21NO3	5573900	5962200	5057000	5104900	6525200	4558300	6427100	5918600	208810	132860	204490	183870	5193100	5792700	5788400	3867500	2276300	2704300	2493900	2748300	-	HMDB0060548	25126776	509-60-4	-	-	--
MW0000300	Ibogaine	-	-	352.236	310.205	[M+CH3CN+H]+	C20H26N2O	479240	454760	453440	501560	492560	485480	449650	468260	502130	485410	547930	483150	462340	552480	502210	497140	507730	511280	467950	565300	-	-	197060	83-74-9	-	-	--
MW0000391	Palmatine	-	-	352.155	351.147	[M+H]+	C21H21NO4	16343	16583	21837	19638	18397	19844	22748	21734	19142	18009	19621	19229	11692	13735	18294	10519	19171	14863	14506	15525	C05315	-	19009	3486-67-7	-	-	--
MW0000398	Pilocarpine	-	-	243.092	208.121	[M+Cl]-	C11H16N2O2	28698	33483	36143	36863	31109	39706	32544	31956	28170	37392	26716	20776	31232	36638	26658	24468	29078	31212	32700	39188	C07474	HMDB0015217	5910	92-13-7	8207	-	--
MW0000400	Piperolactam A	-	-	264.066	265.074	[M-H]-	C16H11NO3	455380	436450	494190	487670	446450	471260	481460	519930	485240	554130	444070	471470	533350	584820	569060	513570	486570	442840	549900	584990	-	HMDB0033060	3081016	112501-42-5	-	-	--
MW0000420	Ranitidine	-	-	315.149	314.141	[M+H]+	C13H22N4O3S	534370	561630	548500	473040	549030	551170	557200	530220	553830	574310	599480	640320	649700	701320	747400	641000	578040	595740	586880	587600	D00422	HMDB0001930	3001055	66357-35-5	8776	2249	--
MW0000445	Sinomenine	-	-	328.15	329.163	[M-H]-	C19H23NO4	160290	155520	159230	185310	185610	140470	189770	204980	25890	18695	20634	26998	210420	296490	220850	177450	91460	69811	101580	92477	-	-	5149465	115-53-7	-	-	--
MW0000450	Sparteine	-	-	286.205	234.21	[M+Cl+NH3]-	C15H26N2	130220	124650	123320	171090	163900	122610	134180	136320	132950	160150	155910	124300	125410	113290	124440	111500	135360	117650	150940	144740	-	-	16212687	6160-12-9	-	-	--
MW0000453	strychnine N-oxide	-	-	718.361	350.163	[2M+NH4]+	C21H22N2O3	3352200	4271600	3216800	3645600	3741500	2586100	3621100	4405900	87933	28151	83111	78421	1331300	1685400	1881900	954470	993170	1011400	1055600	1243600	-	-	211510	23257-79-6	-	-	--
MW0000492	Yohimbine	-	-	355.2	354.194	[M+H]+	C21H26N2O3	2706100	2109700	2823200	2398200	1257500	1233600	1463100	1534200	608080	545920	653460	580630	1002300	1339800	1261900	1071700	899560	1005100	852230	1345600	C09256	HMDB0015464	8969	146-48-5	10093	-	--
MW0000781	(E)-7-[2-Morpholin-4-yl-3-oxo-5-[(4-phenylphenyl)methoxy]cyclopentyl]hept-4-enoic acid	-	-	478.258	477.252	[M+H]+	C29H35NO5	9	9	9	9	9	9	9	9	1047300	902110	883040	763720	9	9	9	9	1087800	1024400	1050700	926620	-	-	6435402	-	-	-	--
MW0000973	[6]-Gingerol	-	-	277.179	294.183	[M+H-H2O]+	C17H26O4	483520	422470	531800	375230	277940	302490	352560	249850	334700	244120	299810	360810	256500	294540	317500	335620	243110	242840	258170	295950	C10462	HMDB0005783	442793	23513-14-6	-	-	--
MW0001057	1-(2,4-Dichlorophenyl)-2-(1-imidazolyl)ethanol	-	-	275.02	256.017	[M+F]-	C11H10Cl2N2O	3291200	3263500	3264400	3670300	3627200	2950700	3738000	4248600	146560	149090	142460	158330	2904000	3776800	3057600	2629900	1548000	1440900	1584000	1595900	-	-	32238	24155-42-8	-	-	--
MW0001492	14-Methoxy-4,4-bisnor-4,8,11,13-podocarpatetraen-3-one	-	-	243.134	242.131	[M+H]+	C16H18O2	4030200	4065400	4664200	4441800	4897500	5165600	4073800	5228800	4687600	4834900	4472100	4304100	4000100	3676000	4023500	4558600	4505000	4370600	4009600	2307700	-	-	6708585	-	-	-	--
MW0001677	1-Nitropyrene	-	-	263.081	247.063	[M+NH4-2H]-	C16H9NO2	232730	197920	272340	266340	297790	292840	290500	331950	7722.5	4097.6	4952	3355.4	194010	210140	178510	163680	107210	83368	111520	105280	C14421	-	21694	5522-43-0	-	-	--
MW0001718	1-Trifluoromethoxyphenyl-3-(1-propionylpiperidin-4-yl)urea	-	-	360.15	359.146	[M+H]+	C16H20F3N3O3	9466.2	5015.6	8213.7	8647.1	20349	8653.2	65712	15806	13465	25170	21621	43342	9	9	9	9	78086	76622	86235	101080	-	-	44142782	1222780-33-7	-	-	--
MW0002151	2,3-Dihydro-2,3-dihydroxy-4-(4-hydroxyphenyl)-1H-phenalen-1-one	-	-	613.181	1366.99	[2M+H]+	C19H14O4	236340	268410	247180	279400	291550	318680	303980	347560	240570	246750	273240	384360	287420	288990	302200	250420	311990	221610	298100	329960	-	HMDB0032848	73121825	-	-	-	--
MW0002271	2,4-Dihydroxybenzophenone	-	-	213.055	214.063	[M-H]-	C13H10O3	9380	11569	13868	9976.2	14025	15570	8318.3	13903	12749	16566	11339	13466	13537	15353	16344	12175	16867	17164	15009	25855	C14215	-	8572	131-56-6	-	-	--
MW0002287	2,4-Dinitrophenol	-	-	183.004	184.012	[M-H]-	C6H4N2O5	11877	14106	18331	11559	14710	13742	15053	15593	16209	16275	12177	15308	16450	19145	14441	12125	13461	13397	18343	18642	C02496	-	1493	25550-58-7	-	-	--
MW0002412	2,6-Di-tert-butyl-1,4-benzenediol	-	-	221.153	1226.83	[M-H]-	C14H22O2	20327	25391	24309	23277	27488	21487	23760	27423	26834	28020	27882	32117	27191	25738	27112	27424	25568	24771	27485	24024	-	HMDB0040178	75550	-	-	-	--
MW0002415	2,6-Di-tert-butyl-4-hydroxymethylphenol	-	-	219.174	236.178	[M+H-H2O]+	C15H24O2	14718000	15477000	14608000	13758000	11349000	12997000	10669000	10507000	15243000	16131000	16733000	17401000	15952000	16744000	17823000	17233000	14881000	16937000	16036000	19125000	-	HMDB0032048	6929	88-26-6	-	-	--
MW0002985	2-Cyano-3-[3-ethoxy-4-hydroxy-5-[(phenylthio)methyl]phenyl]-2-propenamide	-	-	353.099	354.104	[M-H]-	C19H18N2O3S	16035	21549	14146	15331	1824.7	2067.9	2961.1	2540.9	306400	365540	278450	324500	1663800	2568000	1326500	1435800	335270	295440	393550	390860	-	-	5276	107761-24-0	-	-	--
MW0003087	2-hydroxy-2-[4-hydroxy-3-(3-methylbut-2-en-1-yl)phenyl]acetic acid	-	-	281.077	236.105	[M-H+2Na]+	C13H16O4	21700	20520	20675	24928	14603	10182	45381	15675	17858	17799	13067	23794	446380	763460	659500	443720	83173	82877	81985	96339	C12457	HMDB0135908	443851	-	31112	-	--
MW0003565	3,3'-Dimethoxybenzidine	-	-	489.25	244.121	[2M+H]+	C14H16N2O2	1547500	1359900	1491400	1708200	1752400	1577500	1815900	1719100	16398	9009.5	15869	5956.5	1352500	1586900	1021700	802350	502070	459180	562730	501820	C19231	-	8411	119-90-4	-	-	--
MW0004094	3-Methoxy-4-hydroxyphenylglycolaldehyde	-	-	203.039	182.058	[M-2H+Na]-	C9H10O4	426680	299010	382680	356280	3640700	2242900	3417800	3806400	135980	139770	189110	195800	1063500	1118800	1504500	1074900	705060	681330	885970	873450	C05583	HMDB0004061	440729	-	-	-	ko00350,ko01100
MW0004159	3-O-Methylgallic acid	-	-	151.027	184.037	[M+H-2H2O]+	C8H8O5	905280	891110	922220	860800	954610	913900	877590	801400	849190	949000	911130	959850	991580	897410	915570	904970	875750	907610	937260	999630	C05616	-	19829	3934-84-7	-	-	--
MW0004446	4,4'-Methylenebis(2-methylaniline)	-	-	273.169	226.147	[M+HCOO+2H]+	C15H18N2	9	9	9	9	9	9	9	9	1343900	1322200	1144300	845150	30981	36787	26445	29636	497440	503640	524180	512060	C19260	-	13283	838-88-0	-	-	--
MW0004972	4-Fluoro-3-nitrobenzotrifluoride	-	-	208	209.01	[M-H]-	C7H3F4NO2	222930	210200	234760	235120	232450	250200	252220	254360	286290	316770	298960	284200	221990	229870	221220	242700	248940	246530	275120	278070	-	-	67778	367-86-2	-	-	--
MW0005909	9,10-Phenanthrenequinone	-	-	253.022	208.052	[M-H+2Na]+	C14H8O2	5438700	5682900	5670400	5432100	5514000	6230100	5697800	5877800	5496100	5298200	5577800	5514200	4553500	4478400	4799300	4331500	5519700	5046500	4913900	2597600	C03243	-	6763	84-11-7	-	-	--
MW0006009	Alprenolol	-	-	250.176	249.173	[M+H]+	C15H23NO2	3438100	3229900	2864900	3484600	1728200	1772900	1619900	2235100	123070	103220	106160	99413	1169700	1623000	1785600	1218700	1327800	1284100	1346900	1476000	D07156	HMDB0015004	2119	122259-67-0	51211	-	--
MW0006069	Antimycin A1	-	-	547.262	548.273	[M-H]-	C28H40N2O9	9	9	9	9	9	9	9	9	165900	122760	121010	138190	9	9	9	9	170900	143740	165720	167980	C11339	-	12550	1397-94-0	-	-	--
MW0006166	Benzamidine	-	-	167.086	120.069	[M+HCOO+2H]+	C7H8N2	7474200	7670500	8388400	7975800	7411900	8608900	8788900	8132400	8619000	8518200	9442300	8977500	8398100	8317700	9220200	9343500	8453000	8765400	8898100	9797300	C01784	-	2332	618-39-3	-	-	--
MW0006175	Benzeneacetamide, N-[5-(1-methylethyl)-2-thiazolyl]-	-	-	261.105	260.098	[M+H]+	C14H16N2OS	316790	314120	285960	354810	345040	323350	408770	407940	3101200	3706000	3838300	5793400	2831800	3427600	3144100	2133100	5759200	5053500	5726400	6239300	-	-	16760027	267654-00-2	-	-	--
MW0006308	Benzyl ethyl ether	-	-	119.085	1479.11	[M+H-H2O]+	C9H12O	467230	575360	484160	473850	515350	652420	427800	574720	1845300	1959700	2124600	1851900	2010000	3327500	2228100	1273400	1538800	1413800	1545500	1545700	-	HMDB0031312	10873	-	-	-	--
MW0006346	Betaxolol	-	-	325.247	307.215	[M+NH4]+	C18H29NO3	7716.8	28805	29118	17970	5936.2	7667.3	10336	23173	31817	21600	13334	5823.6	10581	17829	35979	16965	8193	4852.2	7999.1	10525	C06849	HMDB0014341	2369	63659-18-7	3082	-	--
MW0006389	Bisphenol A diglycidyl ether	-	-	387.18	340.167	[M+HCOO+2H]+	C21H24O4	23440	565880	4854800	45000	226600	232190	16973000	39638	9	9	9	9	9	9	9	9	1157400	1125800	1008200	1353500	C14348	HMDB0032737	2286	1675-54-3	-	-	--
MW0006551	Chloroxuron	-	-	289.076	290.082	[M-H]-	C15H15ClN2O2	1332600	1229700	1452900	1369800	1443700	1492600	1484000	1536800	1503400	1421100	1371500	1619500	1584800	1706500	1587900	1593700	1366600	1399500	1719300	1684400	-	-	16115	1982-47-4	-	-	--
MW0006597	Citalopram	-	-	340.187	324.164	[M-H+NH3]-	C20H21FN2O	187350	177480	172240	203850	227330	171700	215120	256920	12174	9549.8	10226	13098	378820	534750	402080	386620	113930	109340	111900	112830	C07572	HMDB0005038	2771	59729-33-8	77397	1781	ko00982
MW0006655	Crotamiton	-	-	204.139	203.131	[M+H]+	C13H17NO	185200	164320	198330	154790	175630	249260	207840	189580	479110	439190	394400	461570	443900	495250	407920	384800	257070	275110	416580	395980	D01381	HMDB0014410	688020	124236-29-9	31439	-	--
MW0006686	Cymiazole	-	-	265.098	218.088	[M+HCOO+2H]+	C12H14N2S	366770	278380	359910	413760	453280	449560	412180	467410	15930	10115	13466	10534	277230	303290	283060	250010	175010	178270	165460	92811	-	-	43714	61676-87-7	-	-	--
MW0006708	Dapsone	-	-	247.058	248.062	[M-H]-	C12H12N2O2S	118520	132380	106920	114050	35725	42320	34773	36830	782680	929980	721850	797980	1198200	1349600	1089200	1131500	607150	551200	672150	744590	C07666	HMDB0014395	2955	80-08-0	4325	-	--
MW0006883	Dioctyl phthalate	-	-	457.231	390.277	[M-2H+3Na]+	C24H38O4	1843900	2192300	1361100	2707100	1200600	1767500	2179300	2490600	23937	20500	36611	34242	2997600	3548400	2643100	1591700	548270	849830	726770	646650	C14227	-	8346	117-81-7	-	-	--
MW0006891	Diphenidol	-	-	327.241	309.209	[M+NH4]+	C21H27NO	180610	124200	139810	173130	148630	117000	181690	202180	9669.8	4860.3	6551.4	4265.3	94433	110650	98612	77332	53187	68150	65490	81372	C06961	HMDB0015361	3055	972-02-1	4638	-	--
MW0006902	Diphenylmethylphosphine oxide	-	-	263.082	216.07	[M+HCOO+2H]+	C13H13OP	306610	237280	335940	372600	412040	368110	353570	647960	9	9	9	9	258170	296130	272080	219320	125440	125430	117490	81977	-	-	75041	2129-89-7	-	-	--
MW0007182	Fluometuron	-	-	231.069	232.082	[M-H]-	C10H11F3N2O	426200	408960	446180	432540	460470	491230	482630	491630	485480	491790	418060	470730	432180	439270	412970	468210	422770	407690	464570	447780	C18853	-	16562	2164-17-2	-	-	--
MW0007237	Gentian Violet	-	-	372.243	372.244	[M+H]+	C25H30N3	1767900	1222100	1801800	2297500	139730	186080	3811400	154230	112430	154020	157710	142470	129950	123680	130060	130250	534530	543600	583830	654150	-	HMDB0014550	3468	7438-46-2	77181	-	--
MW0007291	Halopemide	-	-	415.129	416.142	[M-H]-	C21H22ClFN4O2	9	9	9	9	9	9	9	9	9	5478.3	7216.3	17838	32685	62463	61285	24945	28449	36145	28109	31602	D02665	-	65490	59831-65-1	-	-	--
MW0007392	Irbesartan	-	-	427.222	428.232	[M-H]-	C25H28N6O	159080	152470	157950	189410	175670	126400	196280	199940	5433.9	4293.1	5302.2	6600.8	113470	158550	138500	111130	55296	52364	67066	65217	C07469	HMDB0015163	3749	138402-11-6	5959	-	--
MW0007484	Leonurine	-	-	358.16	311.148	[M+HCOO+2H]+	C14H21N3O5	464790	472150	448080	496990	432680	398180	512640	508610	96147	106160	103770	94782	762670	1025400	954820	771920	307170	327290	387030	376250	C16985	-	161464	24697-74-3	-	-	--
MW0007503	Lidocaine	-	-	235.181	234.173	[M+H]+	C14H22N2O	7956300	7635300	6916800	7686000	8275500	8729100	8409700	7024000	8175900	8510400	7751100	7947300	7471600	8964500	8819000	7382700	7111700	8237600	7608800	8328700	C07073	HMDB0014426	3676	137-58-6	6456	-	ko00982
MW0007800	Metolachlor	-	-	284.138	283.134	[M+H]+	C15H22ClNO2	428670	389000	298620	509470	386880	330900	432260	443200	280840	244170	289750	260890	185790	262540	238670	148210	431920	347710	414470	480250	C10953	-	4169	51218-45-2	-	-	--
MW0008096	N-(2-Phenylphenyl)-8-[4-(3-pyridinyl)-1-triazolyl]octanamide	-	-	440.24	439.237	[M+H]+	C27H29N5O	22321	25600	22591	30629	26033	31277	31049	47027	144180	100080	117200	168930	16419	35458	27544	27140	229370	198110	199870	221090	-	-	44819697	1202580-59-3	-	-	--
MW0009118	N-Methylanthranilic acid	-	-	134.06	151.063	[M+H-H2O]+	C8H9NO2	538810	442990	514650	544910	556270	555050	494280	539090	69904	55865	56655	63047	373530	464090	433360	384140	305580	307590	272310	249210	C03005	HMDB0032609	67069	119-68-6	16394	-	--
MW0009167	Norverapamil	-	-	439.254	440.268	[M-H]-	C26H36N2O4	36731	25497	31503	34818	38544	29247	45032	53781	3919.2	3130	9	4283.5	9	9	9	9	18369	21504	17208	24299	-	HMDB0060540	104972	67018-85-3	-	-	--
MW0009240	Octoxinol	-	-	363.32	250.193	[M+H]+	C16H26O2	1210200	1318400	1349500	1340400	1390900	1459100	1398200	1301200	1340500	1356100	1420700	1336000	1599100	1568000	1557200	1478100	1388700	1272000	1398100	1597300	C11623	HMDB0038380	5590	2315-67-5	-	-	--
MW0009333	Paradol	-	-	277.18	278.188	[M-H]-	C17H26O3	208560	168210	188530	192770	92113	92120	157230	101580	92085	138350	118370	91538	83866	111430	99607	103170	73950	80104	81406	80327	C10482	HMDB0030801	94378	27113-22-0	-	-	--
MW0009360	Pentoxifylline	-	-	277.125	278.138	[M-H]-	C13H18N4O3	9	9	9	9	9	9	9	9	482420	624280	564020	435830	2303800	1335300	1391000	1611500	1111500	970440	1198400	1183700	C07424	HMDB0014944	4740	6493-05-6	127029	-	--
MW0009461	Phytanic acid	-	-	381.298	312.303	[M+Na+HCOOH]+	C20H40O2	223630	256650	310010	262420	144140	229450	243500	276280	20164	16939	14887	16279	19716	26599	15003	8339	163500	186690	215830	238780	C01607	HMDB0000801	26840	14721-66-5	16285	5765	--
MW0009469	Pioglitazone	-	-	355.112	356.119	[M-H]-	C19H20N2O3S	9	9	9	9	9	9	9	9	64034	74953	68269	52794	303030	213770	224330	242840	156180	145830	179000	182370	C07675	HMDB0015264	4829	111025-46-8	8228	-	--
MW0009478	Piperidine, 4-(5H-dibenzo[a,d]cyclohepten-5-ylidene)-1-[4-(2H-tetrazol-5-yl)butyl]-	-	-	398.231	397.227	[M+H]+	C25H27N5	15383000	14619000	12915000	17570000	33088000	31677000	36993000	40811000	1140100	789280	911540	1276300	251120	333770	250220	191520	11482000	10859000	10586000	11940000	-	-	11741525	162640-98-4	-	-	--
MW0009531	Promethazine	-	-	586.31	284.135	[2M+NH4]+	C17H20N2S	1149500	1078400	1078200	1270000	1212700	1007100	1393200	1238700	25580	33139	39522	46313	599040	547910	627620	405540	518750	455810	499300	443650	C07404	HMDB0015202	4927	60-87-7	8461	-	--
MW0009760	Spectinomycin	-	-	665.314	332.158	[2M+H]+	C14H24N2O7	847450	881140	672230	1110000	1648000	716890	1791800	1303900	31110	21217	33883	46463	823880	804070	953890	396010	351530	389700	346240	525680	C02078	HMDB0015055	15541	1695-77-8	9215	-	--
MW0009775	Sudan I	-	-	247.087	248.095	[M-H]-	C16H12N2O	137750	110750	148590	140020	150990	157060	145940	174180	8143.4	7201.9	7434.8	4572.5	106100	109900	94543	87000	73451	67489	72083	74693	C19525	-	13297	842-07-9	-	-	ko05204
MW0009787	Sulfadimethoxine	-	-	309.072	310.074	[M-H]-	C12H14N4O4S	4107.7	3792.4	9	9	9	9	9	9	54196	66230	34466	48373	9	9	9	9	39605	34647	36630	46234	D01142	HMDB0015621	5323	1037-50-9	32161	-	--
MW0009807	Sulfapyridine	-	-	268.061	249.057	[M+F]-	C11H11N3O2S	1426200	1429800	1594100	1445000	1417500	1689600	1428000	1456800	1804500	1990700	1626800	1622600	1264500	1160300	1173800	1360100	1521200	1304000	1656100	1760100	D02434	HMDB0015028	5336	144-83-2	132842	-	--
MW0009970	Tribenzylamine N-oxide	-	-	607.334	303.162	[2M+H]+	C21H21NO	7152400	7147900	5659000	9012000	10055000	6073500	11378000	11014000	439330	277210	305660	367120	2746900	1362000	2585700	1063200	2974800	3339500	3409800	3631400	-	-	3624962	6852-46-6	-	-	--
MW0010009	Undecanamide, N-cyclopropyl-11-(2-hexyl-5-hydroxyphenoxy)-	-	-	459.358	417.324	[M+CH3CN+H]+	C26H43NO3	376200	324120	222400	455630	1978000	1690100	2158600	2275300	181870	158600	150920	269640	268070	346730	371940	241000	2136000	2649000	2211200	1895800	-	-	11495398	869376-90-9	-	-	--
MW0010012	Uralenneoside	-	-	285.061	1437.07	[M-H]-	C12H14O8	9	9	9	9	9	9	9	9	22711	24252	29886	32895	832510	1035100	1156300	1205800	338670	313690	444820	442580	-	HMDB0041272	53462251	-	-	-	--
MW0010040	Vanylglycol	-	-	149.059	184.074	[M+H-2H2O]+	C9H12O4	12802000	13030000	13759000	11933000	12234000	11216000	13045000	12592000	3994300	6101000	5840900	5928400	12761000	13612000	12921000	13594000	9237400	9602700	8703300	9410100	C05594	HMDB0001490	10805	67423-45-4	846276	6274	ko00350,ko01100
MW0010041	Vardenafil	-	-	489.235	488.221	[M+H]+	C23H32N6O4S	4037500	4469200	3913300	4643100	4420200	3783500	4418900	4492900	176540	124530	160810	207580	1767900	1345500	1606300	1033100	1723100	1955800	2138900	1821200	D08668	HMDB0015000	135400189	224785-90-4	46295	-	--
MW0010986	(25S)-7-Dafachronic acid	-	-	415.321	414.313	[M+H]+	C27H42O3	9	9	9	9	9	9	9	9	87060	68903	98373	89061	25396	39017	28642	26293	249700	247920	203970	259140	C21077	-	23583984	949004-12-0	-	-	ko04212
MW0011067	(2R)-2,4-Dihydroxy-3,3-dimethylbutanoic acid	-	-	147.066	148.074	[M-H]-	C6H12O4	117320	132380	106710	133270	58951	59690	66710	74421	3697400	3355500	2888100	3024900	3042500	4615900	2921900	3290200	1769900	1769300	1881700	1805100	C00522	-	439251	1112-33-0	-	-	ko00770,ko01100
MW0011581	(R)-1-O-[b-D-Glucopyranosyl-(1->6)-b-D-glucopyranoside]-1,3-octanediol	-	-	469.226	1451.08	[M-H]-	C20H38O12	68777	75541	63281	77342	87466	64595	89754	90106	9	9	9	9	74959	90415	78521	58274	36674	35701	42654	38925	-	HMDB0032799	131751313	-	-	-	--
MW0011818	1-(9Z-hexadecenoyl)-glycero-3-phosphate	-	-	448.246	1507.14	[M-H+CH3CN]-	C19H37O7P	470130	434090	430390	555790	924680	937460	1037000	1088400	25296	14186	17484	25631	40256	67646	59724	39482	322580	282160	341730	329600	-	HMDB0062323	52929751	-	75070	-	--
MW0011898	1,2-Dioctanoyl-sn-glycerol	-	-	327.252	344.256	[M+H-H2O]+	C19H36O5	577080	524810	591690	540130	1313800	1261100	1180100	1561000	61025	86705	78962	88053	72243	81875	83774	80052	412240	435430	451550	419460	-	HMDB0116368	148879	60514-48-9	76979	-	--
MW0011983	10,20-Dihydroxyeicosanoic acid	-	-	327.281	1310.93	[M+H-H2O]+	C20H40O4	132170	113770	122510	129880	63986	67588	59471	74438	60847	55478	50698	62491	26439	27955	38814	39894	108970	136190	107420	141160	-	HMDB0031923	14259007	-	-	-	--
MW0012016	10-Hydroxymyristic acid methyl ester	-	-	257.212	1423.05	[M-H]-	C15H30O3	2527900	2058000	2102300	2827500	1847900	1806900	2055500	2563500	16840	22719	14078	11164	5737.6	3261.3	6689.8	7949.9	694320	629790	729090	747230	-	HMDB0031061	101533769	-	-	-	--
MW0012368	14,15-Leukotriene E4	-	-	462.221	439.239	[M+Na]+	C23H37NO5S	9	9	9	9	9	9	9	9	94537	47033	60025	57879	9	9	9	9	53593	47703	53127	60466	-	-	52921882	1000852-57-2	-	-	--
MW0012473	15-Ketoprostaglandin E1	-	-	353.229	352.225	[M+H]+	C20H32O5	832540	918770	942890	792200	892220	861320	913830	888250	848640	868840	862600	855830	904810	947220	1009400	914530	919870	860690	883450	972750	C04654	HMDB0001320	5280710	22973-19-9	15548	6157	--
MW0012491	15-OxoEDE	-	-	321.246	322.251	[M-H]-	C20H34O3	10534000	7722700	8412000	9853700	8149700	9057700	9782700	9979800	203250	168140	183220	157640	94280	188520	156430	123260	3053600	2506100	2722300	2946500	-	-	53394271	105835-44-7	-	-	--
MW0012521	16,16-dimethyl-PGE2	-	-	379.245	380.256	[M-H]-	C22H36O5	360550	343120	681860	563720	586780	484480	519070	652730	214220	219040	183560	212170	215370	233690	234480	184810	298270	291920	379470	301680	-	-	5283066	39746-25-3	-	-	--
MW0012553	16-Glucuronide-estriol	-	-	463.206	464.205	[M-H]-	C24H32O9	97701	68680	102070	79760	75799	89284	112940	90936	99066	96151	93778	103710	109450	114700	99296	92676	79636	108910	97739	107870	C05504	HMDB0006766	122281	1852-50-2	766	-	ko00140
MW0012793	1-eicosanoyl-glycero-3-phosphate	-	-	931.608	1479.11	[2M-H]-	C23H47O7P	7713600	6621900	6143300	8305500	10601000	10611000	11790000	11737000	387710	225090	205700	312900	725320	1239400	906180	771450	4577000	4572100	4800400	5485500	-	HMDB0062315	52929752	-	74939	-	--
MW0012805	1-Heptadecanoylglycerophosphoethanolamine	-	-	468.311	467.301	[M+H]+	C22H46NO7P	12173000	13079000	9798500	11646000	16519000	17613000	19672000	20713000	596160	406480	529900	481510	419330	921110	725700	698190	9710300	9589200	9155200	9084200	-	HMDB0061691	52925149	-	84490	-	--
MW0012817	1-Hexadecyl lysophosphatidic acid	-	-	433.221	396.264	[M+K-2H]-	C19H41O6P	168650	134410	153250	228090	240350	217580	247960	294150	28267	19327	28526	18563	17938	32407	23379	22202	105670	97691	116390	111420	-	HMDB0062325	11825433	52603-03-9	63818	-	--
MW0012827	1-Hexanol arabinosylglucoside	-	-	395.196	1451.08	[M-H]-	C17H32O10	3369400	3216700	3119700	3699500	3475600	3126200	3578100	3890400	210420	178110	194090	210650	4420700	5202600	4490500	3678600	1703900	1586400	1691300	1824900	-	HMDB0031689	131751182	-	-	-	--
MW0012829	1-Hydroxy Vitamin D2	-	-	413.348	412.334	[M+H]+	C28H44O2	283150	221290	224040	377880	637540	520710	787720	807230	5549	13275	9552.9	7228.7	35551	47344	47583	33638	160360	155280	130030	164590	C08211	-	5281107	54573-75-0	-	-	--
MW0012861	1-Myristoyl-2-hydroxy-sn-glycero-3-phosphoethanolamine	-	-	849.503	425.254	[2M-H]-	C19H40NO7P	31813	26246	24194	45058	135990	123360	149990	188610	8145.5	4196.8	6027.2	15250	9	9	9	9	81132	101520	109650	102810	-	HMDB0011500	9547070	123060-40-2	84299	-	--
MW0012978	1-Palmitoylglycerol	-	-	331.285	330.277	[M+H]+	C19H38O4	153000	133130	135100	121560	121780	156210	253370	217840	75087	67959	52700	53783	158390	123610	105690	179120	96281	119340	115170	171870	-	-	14900	542-44-9	-	-	--
MW0013013	1-Stearoylglycerophosphoserine	-	-	506.29	525.307	[M-H2O-H]-	C24H48NO9P	2658900	2249200	2090300	2870700	5012200	4860400	5641300	5897100	1370000	1061200	994670	1609700	227870	314970	236060	181270	4264000	3991100	4492700	4632500	-	HMDB0061698	74819135	-	-	-	--
MW0013069	2,2,4,4,-Tetramethyl-6-(1-oxopropyl)-1,3,5-cyclohexanetrione	-	-	237.114	1310.93	[M-H]-	C13H18O4	9	9	9	9	9	9	9	9	844830	812560	641650	516950	14635	23127	16094	17049	307930	278900	333750	346970	-	HMDB0033191	100958560	-	-	-	--
MW0013139	2,4-Dihydroxyheptadec-16-ynyl acetate	-	-	309.242	326.246	[M+H-H2O]+	C19H34O4	80722	83254	87300	104760	101160	87854	69683	92319	82329	77520	67498	107060	87195	93307	88112	91158	86921	102730	93677	74644	-	HMDB0031048	3952079	-	920054	-	--
MW0013226	20-hydroxy N-Arachidonoyl Taurine	-	-	426.226	427.239	[M-H]-	C22H37NO5S	9	9	9	9	9	9	9	9	17460	9977.7	11077	12559	1821.7	5020	1907.6	1918.8	38298	37882	37677	43248	-	-	53394637	-	-	-	--
MW0013368	28-Homobrassinolide	-	-	493.358	1577.22	[M-H]-	C29H50O6	103220	101170	111020	108730	102870	99073	112470	94740	108990	120250	105820	112910	128690	111160	126940	118890	90034	88500	98219	109470	-	HMDB0030423	11038340	-	-	-	--
MW0013661	2-Stearoylglycerophosphoglycerol	-	-	549.253	1376.97	[M+K-2H]-	C24H49O9P	8328100	8860600	8681200	8785700	4716100	4529900	6108900	6145500	5427700	3905500	3906800	5075800	1694700	1761200	1519800	1233300	9717000	7410600	7748500	10576000	-	HMDB0061703	45479454	-	-	-	--
MW0013836	3,4-Dimethyl-5-Propyl-2-Furantridecanoic Acid	-	-	349.276	350.282	[M-H]-	C22H38O3	40639	14398	15293	44388	27353	30151	17086	20974	9	9	9	9	3364.9	11888	4687.2	2434.9	42931	24739	49127	56071	-	HMDB0112078	71374382	-	-	-	--
MW0013896	3a,7a,12a,19-Tetrahydroxy-5b-cholanoic acid	-	-	407.281	659.861	[M+H-H2O]+	C24H40O6	9	9	9	9	9	9	9	9	31865	25768	33557	24972	9	9	9	9	19443	21155	26981	21549	-	HMDB0000340	5283905	-	-	5329	--
MW0014077	3-Hydroxy-8'-apo-epsilon-caroten-8'-al	-	-	415.318	1447.05	[M+H-H2O]+	C30H40O2	9	9	9	9	9	9	9	9	104310	43207	75705	76332	60537	116760	80498	45151	162080	126290	174090	182820	-	HMDB0036885	131752080	-	-	-	--
MW0014116	3-hydroxypristanic acid	-	-	313.278	1437.07	[M-H]-	C19H38O3	9	9	9	9	9	9	9	9	4042.4	4739.6	4744.5	3499.6	3330.3	4972.1	1780.9	1281.4	11557	11834	10918	10859	-	HMDB0061651	71346921	-	-	-	--
MW0014120	3-Hydroxysintaxanthin	-	-	429.32	1324.94	[M+H-H2O]+	C31H42O2	618860	774860	750990	737040	835280	652330	726040	748920	700640	670630	748760	746500	688960	741870	655280	783180	639440	686950	604030	672220	-	HMDB0035641	131751826	-	-	-	--
MW0014427	4-Androsten-17β-ol-3-one glucosiduronate	-	-	511.276	464.241	[M+HCOO+2H]+	C25H36O8	126660	157230	118720	138400	126090	101170	195260	148930	9	9	9	9	2342600	2768000	2343300	1779400	394370	373960	378050	411460	C11134	HMDB0003193	108192	1180-25-2	28835	2794	ko00140
MW0014545	4-O-Methylmelleolide	-	-	432.237	1381	[M+NH4]+	C24H30O6	3067000	2003900	2890600	3259100	1005200	1606500	1943800	895380	1043500	1115600	1029400	1043500	1195800	1604900	907210	957370	728380	803510	742830	1148700	-	HMDB0037039	180718	-	-	-	--
MW0014708	5-Androstene-3β,17β-diol	-	-	325.199	290.225	[M+Cl]-	C19H30O2	12668000	12034000	12245000	12724000	10687000	11381000	11495000	12145000	241170	190580	120860	137190	198060	230960	192130	151440	7697500	7238000	7894100	7943000	C04295	HMDB0003818	10634	521-17-5	2710	6983	ko00140,ko04913
MW0015053	6-Maleimidocaproic acid	-	-	176.073	211.084	[M+H-2H2O]+	C10H13NO4	758300	468350	783500	689930	3430600	2157400	3882200	3794500	282170	368200	507550	481340	1315400	1090300	1591500	936010	1395600	1218300	1154600	904540	-	-	573683	55750-53-3	-	-	--
MW0015167	7alpha-Hydroxy-3-oxo-4-cholestenoate	-	-	429.303	430.308	[M-H]-	C27H42O4	9	9	9	9	9	9	9	9	8847.6	6384.2	6521.2	7653.1	3761.2	5528.3	3865.1	2627.6	16053	13143	14425	14070	C17337	HMDB0012458	3081085	115538-85-7	83036	-	ko00120
MW0015184	7-Dehydrocholesterol	-	-	421.293	384.339	[M-2H+K]-	C27H44O	9	9	9	9	9	9	9	9	77406	49056	55244	68107	35530	41044	44839	33598	82424	73542	106090	87103	C01164	HMDB0000032	439423	434-16-2	17759	5101	ko00100,ko00981,ko01100
MW0015225	7-Oxo-11-dodecenoic acid	-	-	211.134	212.141	[M-H]-	C12H20O3	19918	21042	19658	22334	75485	63094	21384	77527	18836	21120	16968	12058	16271	20870	16063	17879	22345	22880	22724	23617	-	-	4374065	54921-60-7	-	-	--
MW0015313	8-Geranyl-7-hydroxycoumarin	-	-	299.165	298.157	[M+H]+	C19H22O3	156550	125880	116840	162730	54773	61113	58101	64699	33975	48783	27399	16323	11558	6842.3	12644	9483.2	33922	36547	43378	39884	C21495	-	71694409	23660-05-1	-	-	--
MW0015657	All-trans-Pentaprenyl diphosphate	-	-	537.254	518.256	[M+F]-	C25H44O7P2	4223500	3722700	2985400	4236800	5378000	5602700	6624800	6672200	387910	247000	231200	299210	949060	1295900	1007400	925210	2931900	3097800	3166500	3551200	C04217	HMDB0012231	5280659	-	16818	-	--
MW0015775	Androsta-1,4-diene-3,17-dione	-	-	321.132	284.178	[M-2H+K]-	C19H24O2	938180	901720	915310	929230	770780	873170	808370	814180	945260	1014500	868130	867560	862930	911280	822860	883720	879390	771130	966430	1035400	C20144	HMDB0003422	13472	897-06-3	40799	-	ko01100
MW0015906	Armillarin	-	-	867.372	1390.99	[2M+K]+	C24H30O6	2989000	1104500	2240900	2062000	146750	165060	364090	163800	1230900	1217600	1413100	1427000	1197900	2403500	1291300	1398300	447880	465900	450300	134010	-	HMDB0039380	134206	-	-	-	--
MW0016016	Avocadene acetate	-	-	346.298	328.261	[M+NH4]+	C19H36O4	9	9	9	9	9	9	9	9	256550	228130	229140	206930	154810	226580	225680	132770	399070	392850	385630	459740	-	HMDB0031043	25107527	24607-09-8	967297	-	--
MW0016112	beta-Doradecin	-	-	603.386	1348.94	[M+Na]+	C40H52O3	60895	68368	67813	69376	63778	38714	71675	55997	81598	80034	53277	79427	69438	66747	46339	67323	107510	135990	121390	114010	-	HMDB0039143	-	-	-	-	--
MW0016150	beta-Sitostenone	-	-	413.374	412.371	[M+H]+	C29H48O	648460	608520	572710	692870	1470500	1042100	1870400	1614000	40579	34598	46831	25293	40546	69818	68442	63950	340820	348460	375210	453840	-	HMDB0033934	60123241	-	-	-	--
MW0016314	Camelledionol	-	-	441.334	1310.93	[M+H]+	C29H44O3	89656	97730	96165	114060	120110	153300	129760	128410	112690	148630	126270	144710	161990	181170	135930	157020	108070	146300	164620	201240	-	HMDB0035730	131751856	-	-	-	--
MW0017207	Citronellyl acetate	-	-	216.195	198.162	[M+NH4]+	C12H22O2	55853	58540	60372	68905	59842	57237	76523	74387	92140	96158	106170	90381	132920	166270	167360	153850	114000	102060	106220	115670	C12298	HMDB0034160	9017	150-84-5	-	-	--
MW0017222	Citroxanthin	-	-	570.459	552.433	[M+NH4]+	C40H56O	3373400	2915900	3533500	3222500	3898400	3398300	2895400	2561700	3374500	3570000	2604600	3020100	3029200	2875700	2787200	3130500	2774800	2894500	2786900	3790500	C08605	HMDB0036869	5281246	515-06-0	-	-	--
MW0049037	Cortolone	-	-	403.183	366.241	[M-2H+K]-	C21H34O5	546340	367110	576410	633230	1357700	803870	1302500	1481700	7252.7	1998.3	4863.6	2162.3	93156	140730	122500	73167	287800	261840	343480	351700	C05481	HMDB0003128	160499	516-42-7	3899	3175	ko00140
MW0049213	Demethylphylloquinone	-	-	473.273	436.334	[M-2H+K]-	C30H44O2	6830300	4488700	6936400	7684500	2470000	3359400	6141500	2845600	2473700	2302900	1949300	2095900	2290800	2793400	1838600	1864000	1543200	1740600	1637100	2034900	C13309	HMDB0004649	11954010	-	-	-	ko00130,ko01100
MW0052352	Digitoxin	-	-	787.42	764.435	[M+Na]+	C41H64O13	492580	631060	530240	701120	819500	496860	776830	739160	9	9	9	9	422440	513910	412370	330720	211630	195230	263460	220440	C06955	HMDB0015468	441207	-	28544	-	--
MW0052412	Dimethylallyl diphosphate	-	-	280.98	246.006	[M+Cl]-	C5H12O7P2	337010	333620	308040	407610	265320	210820	359390	391860	812350	703760	617820	688500	2748000	3557600	3285400	3755800	1126400	909160	1081300	1242200	C00235	HMDB0001120	647	358-72-5	16057	6016	ko00900,ko01100
MW0052501	Dydrogesterone	-	-	313.212	312.209	[M+H]+	C21H28O2	54954	53332	51921	38994	51579	56792	49115	56014	45357	41091	39369	41104	74512	36935	64026	69806	65250	67562	63014	114800	D01217	HMDB0014522	9051	-	31527	-	--
MW0052578	Eplerenone	-	-	432.249	414.204	[M+NH4]+	C24H30O6	9	9	9	9	9	9	9	9	102940	73242	79138	81256	9	9	9	9	150950	159070	115580	175310	C12512	HMDB0014838	443872	-	31547	-	--
MW0052658	Estradiol valerate	-	-	355.227	356.235	[M-H]-	C23H32O3	34314	38204	34414	32704	34988	38802	39247	43105	36640	37917	37114	32892	37568	36827	32223	32236	37974	36675	40323	38425	C12859	-	13791	979-32-8	-	-	--
MW0052699	Ethyl 3-hydroxytridecanoate	-	-	257.215	1381	[M-H]-	C15H30O3	9	9	9	16459	9	9	9	9	112830	82591	82177	83365	203140	278390	288210	181340	164930	139030	191530	191520	-	HMDB0059866	575914	-	87428	-	--
MW0052888	Fasciculic acid B	-	-	654.453	1296.91	[M+NH4]+	C36H60O9	41130	38371	26411	53663	49973	52677	49546	52091	9	9	9	9	9	9	9	9	25683	44110	28086	15107	-	HMDB0036438	14506482	-	-	-	--
MW0053732	Glycerophospho-N-Oleoyl Ethanolamine	-	-	981.6	479.301	[2M+Na]+	C23H46NO7P	164520	105590	116550	124470	5668800	4685000	6264100	7212400	114400	80937	49515	177040	241710	238790	181760	188670	6001800	5845200	5140100	5107500	-	-	53393982	201738-24-1	-	-	--
MW0053735	Glycerophospho-N-palmitoylethanolamine	-	-	476.28	453.286	[M+Na]+	C21H44NO7P	68379	67968	70817	96551	3362200	2932300	2828800	3707000	12311	9	9	9	9	28167	30195	13966	1775800	1890500	1850600	1698900	-	-	53393933	100575-09-5	-	-	--
MW0053753	Glycochenodeoxycholic acid 7-sulfate	-	-	576.286	529.271	[M+H+HCOOH]+	C26H43NO8S	9	9	9	9	9	9	9	9	735780	503870	599090	614900	9	9	9	9	820740	966720	862670	716700	C15559	HMDB0002496	11954205	-	52031	6701	--
MW0053831	Hecogenin	-	-	431.318	430.308	[M+H]+	C27H42O4	9	9	9	9	9	9	9	9	123370	109710	118510	120720	70978	74608	78797	64583	300960	340380	295960	310650	C08902	-	91453	467-55-0	-	-	--
MW0054315	Leukotriene A4	-	-	358.237	318.219	[M-H+CH3CN]-	C20H30O3	9	9	9	9	9	9	9	9	25875	22207	21221	22845	24714	26224	29588	17092	51647	44140	54290	57424	C00909	HMDB0001337	5280383	72059-45-1	15651	3449	ko00590,ko01100,ko04726
MW0054447	Lucyoside K	-	-	631.384	1212.82	[M-H]-	C36H56O9	622030	554720	618330	497850	497690	442180	443610	423610	934260	916260	857730	872320	388210	380900	344340	296030	777600	539300	578180	614050	-	HMDB0041353	14020482	-	-	-	--
MW0054480	Lyngbic acid	-	-	279.194	256.204	[M+Na]+	C15H28O3	8228400	8068300	7299600	7768300	8334600	7700700	7377100	6974700	7448500	8314900	8267400	7745700	7563300	7505900	7845800	7756400	7417500	7668900	7523100	7337500	-	-	11065049	-	-	-	--
MW0054771	Mesaconitine	-	-	632.313	631.299	[M+H]+	C33H45NO11	3084300	3710900	2983500	4042700	3422100	2342400	4089700	3403800	88741	106350	115100	132560	2244100	2945600	2529300	1780100	1221600	1345600	1426800	1567500	-	-	23641113	2752-64-9	-	-	--
MW0054902	Methyl myristoleate	-	-	258.243	240.209	[M+NH4]+	C15H28O2	26097	14335	24266	20966	101410	133990	175920	194380	517600	404090	635020	524300	1163400	1661600	1563700	1053800	1934800	2093700	2020300	1889500	-	-	5352674	56219-06-8	-	-	--
MW0054949	Methylprednisolone succinate	-	-	473.214	474.225	[M-H]-	C26H34O8	6157300	4430000	6774800	7680600	2133500	3127500	5573200	2654400	2236700	2105200	1719200	2042300	2264800	2651300	1665700	1988100	1567300	1500400	1696300	1917400	D05000	-	16923	2921-57-5	-	-	--
MW0054976	MG(0:0/20:1(11Z)/0:0)	-	-	451.267	806.736	[M-2H+3Na]+	C23H44O4	6690200	7596300	7003200	6920500	5936400	6177600	6580900	6392700	6824500	7690700	7615200	6567000	7275700	7228800	7891400	7734500	7681600	7292900	6850400	7021200	-	HMDB0011543	53480963	-	-	-	--
MW0055015	MG(15:0/0:0/0:0)	-	-	315.253	764.689	[M-H]-	C18H36O4	127850	129770	144880	123480	130090	145810	135440	109170	207650	232350	208030	223680	190110	177430	229450	237690	179300	196310	186390	215110	-	HMDB0011563	46879024	-	-	-	--
MW0055139	Muricatacin	-	-	285.242	1395.02	[M+H]+	C17H32O3	1258400	1124000	1082100	1178900	1082300	986020	1287000	1064600	1152500	1186100	1100600	974630	1033200	1026800	998810	949220	2793700	2485000	2729900	2358500	-	HMDB0038685	10016749	-	-	-	--
MW0055214	N,2,3-Trimethyl-2-(1-methylethyl)butanamide	-	-	172.17	1296.91	[M+H]+	C10H21NO	53449	56603	66358	62278	38149	49119	59229	62288	26941	25747	31063	22797	33603	56299	54180	42122	42627	37933	35788	54257	-	HMDB0036195	65300	-	-	-	--
MW0055215	N,N-Bis(2-hydroxyethyl)dodecanamide	-	-	288.254	287.246	[M+H]+	C16H33NO3	477740	258680	1705500	837990	121150	372530	596950	284840	34125	40058	38460	39347	135120	605720	91580	88966	276490	289390	267620	293760	-	HMDB0032358	8430	120-40-1	-	-	--
MW0055334	N-Octanoylsphingosine	-	-	408.378	425.387	[M+H-H2O]+	C26H51NO3	122490	222260	216490	207340	278620	196380	184300	191080	153660	140850	141700	122440	151960	136150	153440	148620	163950	127320	128850	145570	-	-	5702614	74713-59-0	-	-	--
MW0055412	N-Stearoyltaurine	-	-	414.264	391.276	[M+Na]+	C20H41NO4S	140200	126480	119270	130700	328130	206700	402280	324620	7244.5	9	9	9	11691	12887	14527	12394	87121	60946	79427	82231	-	-	168274	63155-80-6	-	-	--
MW0055430	Oct-1-en-3-yl 6-O-pentopyranosylhexopyranoside	-	-	440.251	422.215	[M+NH4]+	C19H34O10	497870	556940	507820	592160	506800	458140	570360	594910	20038	14983	16027	21870	288880	211650	273700	159960	226710	270510	286030	265560	-	HMDB0032960	24094121	-	-	-	--
MW0055515	Oxfendazole	-	-	314.06	315.068	[M-H]-	C15H13N3O3S	652820	659540	674010	624140	665900	742170	711690	691540	882740	979290	792340	803860	670170	648660	665680	741660	795030	698900	788000	805810	D05291	HMDB0031812	40854	53716-50-0	35812	-	--
MW0056732	Palmitelaidic acid	-	-	272.258	254.225	[M+NH4]+	C16H30O2	9	9	9	9	9	9	9	9	92747	88951	94430	100920	120120	177900	140070	137000	179230	147180	147150	145000	-	HMDB0012328	5282745	10030-73-6	59265	-	--
MW0056751	Palmitoylserinol	-	-	330.302	329.293	[M+H]+	C19H39NO3	15158	9356.1	8621	12206	18631	9386.5	18233	17249	535450	418500	473700	544110	256270	350000	335370	228570	404850	425080	444020	447950	-	HMDB0013654	9862307	126127-31-9	-	-	--
MW0062242	Prostaglandin E2 p-acetamidophenyl ester	-	-	468.276	485.278	[M+H-H2O]+	C28H39NO6	90861	85396	91011	117200	333580	320180	379690	401710	125310	112700	120380	125520	73338	92745	66601	67118	442610	498310	472410	500220	-	-	23424546	57790-52-0	-	-	--
MW0062283	Prostratin	-	-	409.205	390.204	[M+F]-	C22H30O6	221550	187430	222630	211440	225440	222630	254230	290090	236690	264310	325480	260980	354980	387830	351070	346910	250230	215470	280090	290170	C20197	-	454217	60857-08-1	-	-	--
MW0063221	Psychosine	-	-	508.347	461.335	[M+HCOO+2H]+	C24H47NO7	9	9	9	9	9	9	9	9	83236	78431	80799	97689	49098	65969	46125	44272	97289	102160	88204	94003	-	HMDB0000648	91746255	2238-90-6	16874	5620	--
MW0063351	Ricinoleic acid methyl ester	-	-	313.272	312.266	[M+H]+	C19H36O3	112490	95074	98494	120270	89471	94361	98396	109600	116170	82851	85684	94794	106440	123980	82815	109070	82671	115560	123280	115580	-	-	5354133	141-24-2	-	-	--
MW0063433	Santonin	-	-	262.146	246.126	[M+NH4-2H]-	C15H18O3	301310	261950	247170	311650	296880	231570	306040	364540	4345.3	3782.3	4540.8	4518.4	143000	180360	151190	122750	105970	102650	114300	122100	C02206	-	221071	481-06-1	-	-	--
MW0063596	Sorbitan monopalmitate	-	-	385.293	402.298	[M+H-H2O]+	C22H42O6	2169700	2032300	2117400	2308400	1930000	1908100	2258300	2502400	78657	78223	67009	72666	68732	93376	76507	85861	695580	828400	807970	749190	-	HMDB0029887	14927	26266-57-9	-	-	--
MW0063665	Stearoyl-L-carnitine	-	-	448.334	427.366	[M+Na-2H]-	C25H49NO4	22348	15498	20953	16659	20363	21357	25199	19989	21856	21879	18316	17623	20075	22048	20317	20785	21751	19783	16158	22473	-	HMDB0000848	52922056	25597-09-5	84644	5811	--
MW0063704	Sulfaphenazole	-	-	313.071	314.084	[M-H]-	C15H14N4O2S	91272	84020	97524	91546	84873	114960	100640	106490	146750	185200	158720	160410	63190	59986	71477	79393	116030	118020	135790	135680	D01954	HMDB0015667	5335	526-08-9	77780	-	--
MW0063802	Tetradecanal	-	-	254.25	1240.85	[M+CH3CN+H]+	C14H28O	24368	27399	23318	19391	49389	66829	82981	84276	44659	29268	29938	23145	153300	242130	213670	177420	53347	67131	70691	59012	-	HMDB0034283	31291	124-25-4	84067	-	--
MW0102841	Toxin T2 tetrol	-	-	297.133	298.142	[M-H]-	C15H22O6	301130	283100	314480	492110	222270	236740	320420	233890	197880	259780	265610	186960	235060	272980	197710	170480	234780	204630	212290	239170	-	HMDB0036159	9904331	34114-99-3	-	-	--
MW0102918	Triamcinolone	-	-	441.197	394.179	[M+HCOO+2H]+	C21H27FO6	142380	130820	157620	159220	132570	152610	158460	176270	144620	122500	148320	109920	105790	126450	108160	85940	155510	148660	113770	90504	D00385	HMDB0014758	31307	-	9667	-	--
MW0102923	Tricaproin	-	-	409.255	386.267	[M+Na]+	C21H38O6	491760	489410	506190	543640	460730	587830	523450	351070	570900	545600	502400	659360	595270	536710	578110	570170	383990	442220	523330	471390	-	HMDB0031125	12131	621-70-5	77386	-	--
MW0103120	Vitamin K	-	-	468.39	450.35	[M+NH4]+	C31H46O2	916200	806620	782720	683120	813300	915340	816260	707750	924110	830890	704770	759560	693340	889020	821850	832540	673430	733570	700780	984880	C02059	HMDB0003555	5280483	79083-00-4	18067	7027	ko00130,ko01100,ko04977
MW0103159	xi-5-Hydroxydodecanoic acid	-	-	215.165	1198.8	[M-H]-	C12H24O3	17123	10934	26491	27067	17575	39264	25824	29447	62881	50884	60332	52000	50545	85261	67146	48223	70942	79825	86226	91919	-	HMDB0040169	24520	-	-	-	--
MW0103256	β-Estradiol 3-sulfate	-	-	351.133	352.134	[M-H]-	C18H24O5S	52430	36224	53402	32463	26788	32956	37017	18572	35594	25451	33166	34244	22069	28393	28040	29521	19884	24973	22338	27842	-	-	54254881	-	-	-	--
MW0103376	3'-O-Methylguanosine	-	-	296.102	126.104	[M-H]-	C11H15N5O5	10423	12973	7767.6	11187	9	8332.6	4347	5588.6	1729200	1596200	1574200	1608400	719690	1103300	701200	931350	746500	607970	819590	858190	-	HMDB0006038	135742509	-	70867	-	--
MW0103550	dTDP-D-glucose	-	-	563.066	386.355	[M-H]-	C16H26N2O16P2	9	9	6767.7	9	9	9	9	9	767180	676600	627750	548180	15714	28270	18591	18729	328090	296870	271690	335290	-	HMDB0001328	439324	-	35248	6163	--
MW0103669	Thioinosinic acid	-	-	404.043	364.024	[M-H+CH3CN]-	C10H13N4O7PS	32184	26104	22389	33206	10966	15256	33649	19798	9390100	3242200	5613100	5235200	698450	600040	623920	628840	3040200	2264700	3173400	2582000	C04646	HMDB0060416	3034391	53-83-8	2332	-	ko00983
MW0103674	Thymidine-5'-diphosphate	-	-	401.016	402.023	[M-H]-	C10H16N2O11P2	16883	9186	9	9	9	9	9	9	94671	67903	66646	103190	8662.3	9097.8	13246	14608	43206	52390	49666	37284	C00363	HMDB0001274	164628	491-97-4	18075	6129	ko00240,ko01100
MW0103694	UDP-N-acetylmuraminate	-	-	678.096	679.103	[M-H]-	C20H31N3O19P2	9	17046	9	17529	9	9	9	9	1731400	1059500	1082800	1506600	1020000	1647100	1581600	1216600	955760	723940	1071000	816880	-	HMDB0011720	1169	-	88385	-	--
MW0103714	Zalcitabine	-	-	210.088	211.096	[M-H]-	C9H13N3O3	360800	307700	326340	360120	347840	311320	329360	355350	34673	24553	31602	23243	309490	353520	395750	302190	139300	133840	178400	183270	C07207	HMDB0015078	24066	7481-89-2	10101	-	ko04976
MW0103804	(-)-Indolactam V	-	-	641.329	301.179	[2M+K]+	C17H23N3O2	6537000	7758900	6704000	8563600	10174000	5737300	10236000	11140000	360970	347980	359820	455740	6112700	5496700	6289200	3655200	3576900	3683700	3559900	3953600	-	-	105000	90365-57-4	-	-	--
MW0103875	(2S)-2-Isopropyl-3-oxosuccinate	-	-	214.082	174.053	[M-H+CH3CN]-	C7H10O5	9	9	9	9	9	9	9	9	79050	61222	59233	49076	71064	83451	72114	68362	165900	133370	126660	140920	C04236	HMDB0012149	5462259	-	1467	-	ko00290,ko01100,ko01210
MW0103901	(3R)-3-Hydroxy-2-oxo-4-phosphonooxybutanoate	-	-	194.962	213.988	[M-H2O-H]-	C4H7O8P	9	9	9	9	9	9	9	9	1866400	2332400	642920	2267100	2221800	2842300	3190200	673540	2789800	2907300	2504100	2506200	C06054	HMDB0006801	21145142	-	27951	-	ko00750,ko01100
MW0104000	(S)-2-Acetyl-2-hydroxybutanoic acid	-	-	181.03	146.058	[M+Cl]-	C6H10O4	15873	15046	15996	13851	13146	13577	10778	11856	13572	13681	12247	10425	8301.9	8837.3	12258	10973	4719.4	11730	13126	9673.7	C06006	HMDB0006900	440875	-	27681	-	ko00290,ko01100,ko01210,ko01230
MW0104191	1,3-Thiazolidine-4-carboxylic acid	-	-	134.026	133.02	[M+H]+	C4H7NO2S	9	9	9	9	9	9	9	9	5271800	2629600	8227200	5784200	673460	748100	675270	601950	5767600	4646400	6334900	5883300	D08601	-	9934	444-27-9	-	-	--
MW0104380	2,2,4-Trimethyl-1,3-pentanediol diisobutyrate	-	-	309.203	286.214	[M+Na]+	C16H30O4	97681	110980	98690	84448	102500	70607	78317	74127	77463	91556	89622	81238	76831	78342	72543	83890	71176	85006	85924	96935	-	HMDB0059777	23284	6846-50-0	-	-	--
MW0104564	2-amino-4-({1-[(carboxymethyl)-C-hydroxycarbonimidoyl]-2-{[(4S)-4,10,14,16-tetrahydroxy-5,9,11,13,13-pentamethyl-2-[1-(2-methyl-1,3-thiazol-4-yl)prop-1-en-2-yl]-12-oxo-1-azacyclohexadec-1(16)-en-5-yl]sulfanyl}ethyl}-C-hydroxycarbonimidoyl)butanoic acid	-	-	796.36	813.365	[M+H-H2O]+	C37H59N5O11S2	327790	400270	352210	445920	476860	329480	500510	493990	21978	21670	13390	13907	202820	182620	230100	91605	178990	166870	175390	187940	-	HMDB0127539	131833877	-	-	-	--
MW0104842	2-Phthalimidoglutaric acid	-	-	293.079	277.059	[M+NH4-2H]-	C13H11NO6	94903	101180	87256	96500	53318	43266	58900	66107	13242000	4946200	6599200	6320200	1314300	3932300	1085800	1570500	3516900	2965700	4065200	3797500	-	-	92225	6349-98-0	-	-	--
MW0105006	3-Dehydroquinic acid	-	-	189.033	190.048	[M-H]-	C7H10O6	4018.7	7001.6	8781.8	4465.5	3937	6006.3	2948.7	6381	2199600	1285100	1312000	1297800	50012	65149	48112	54352	688550	658290	697420	624660	C00944	HMDB0012710	439351	10534-44-8	17947	-	ko00400,ko01100,ko01230
MW0105037	3-Hydroxycapric acid	-	-	187.134	188.141	[M-H]-	C10H20O3	42789	39602	33533	45637	34663	32966	38643	49619	36561	31040	52963	34878	18509	15478	11359	13991	35111	33278	37534	37769	-	HMDB0002203	26612	19526-23-9	132983	6544	--
MW0105120	3-Oxododecanoic acid	-	-	213.149	214.157	[M-H]-	C12H22O3	11314	13053	12291	9971.4	10282	7922.1	13005	14544	21824	14723	12029	13729	13869	18103	21355	14005	20795	21043	25401	26462	C02367	HMDB0010727	439717	-	18037	-	--
MW0105424	Acetylleucine	-	-	174.111	173.105	[M+H]+	C8H15NO3	158610	187260	128550	164940	57017	51072	63409	61844	687920	694590	745760	641500	4053700	6841700	4166200	4081900	1144800	1174800	1138000	1349300	D07350	-	1995	99-15-0	-	-	--
MW0105573	Ala-Val-OH	-	-	315.084	296.101	[M+F]-	C13H16N2O6	193410	174790	164320	233140	40635	52087	49318	75235	9	9	9	9	2731600	2678900	3649200	1872600	564380	430030	515690	587910	-	-	-	-	-	-	--
MW0105602	Amastatin	-	-	473.26	474.269	[M-H]-	C21H38N4O8	6115700	6401100	5644700	6814300	8366200	5913400	8080100	8782600	191550	117740	170510	145620	624130	1089000	1555300	1079000	2193100	2111000	2006200	2217900	C01552	-	439518	67655-94-1	-	-	--
MW0105789	Asn Phe Arg	-	-	436.229	435.223	[M+H]+	C19H29N7O5	5042600	5867000	4586200	6798000	6562700	5277100	6987900	6666900	157520	165180	173420	262490	3975400	4285100	4181800	3600100	1992800	1662900	2795700	2901000	-	-	-	-	-	-	--
MW0105871	Asp Phe Arg	-	-	437.206	436.207	[M+H]+	C19H28N6O6	4039600	5988000	3199300	7102800	14229000	7687000	18358000	17040000	52404	24824	49738	40133	927210	2257500	851580	1010800	2505200	3175000	3419500	3385200	-	-	-	-	-	-	--
MW0106013	Benzeneacetamide, N-[(1S)-2-[[(7S)-6,7-dihydro-5-methyl-6-oxo-5H-dibenz[b,d]azepin-7-yl]amino]-1-methyl-2-oxoethyl]-3,5-difluoro-alpha-hydroxy-, (alphaS)-	-	-	480.176	479.166	[M+H]+	C26H23F2N3O4	248930	306550	291920	299670	390260	242760	388450	353280	10743	5843.1	10000	10238	313400	399760	367790	250480	119150	120190	119440	141800	-	-	10435235	209984-57-6	-	-	--
MW0106016	Benzoic acid, 3-[[(3-carboxycyclohexyl)amino]carbonyl]-4-[3-[4-(4-phenoxybutoxy)phenyl]propoxy]-	-	-	588.265	589.268	[M-H]-	C34H39NO8	9	9	9	9	9	9	9	9	198740	125480	153580	108860	9	9	9	9	189900	163870	205290	217300	-	-	53394034	712313-33-2	-	-	--
MW0106258	Cys His Arg	-	-	415.183	414.18	[M+H]+	C15H26N8O4S1	9	9	9	9	9	9	9	9	2018300	1921300	2253300	2185300	9	9	9	9	768630	985650	1031400	857860	-	-	-	-	-	-	--
MW0106267	Cys Ser	-	-	191.049	208.052	[M+H-H2O]+	C6H12N2O4S1	9	9	9	9	9	9	9	9	3396000	1499300	2325300	2159000	30358	48775	39045	31390	451340	693710	857410	949500	-	-	-	-	-	-	--
MW0106360	D-Arginine	-	-	387.187	174.112	[2M+K]+	C6H14N4O2	9	9	9	9	9	9	9	9	25486000	24173000	27352000	25308000	594130	461940	475830	330810	10806000	12860000	11231000	14017000	C00792	HMDB0003416	71070	157-06-2	15816	6924	ko00472,ko01100
MW0106379	D-erythro-Imidazolylglycerol phosphate	-	-	259.004	238.035	[M+Na-2H]-	C6H11N2O6P	9	9	9	9	31831	11087	9	9	2953900	2267400	638270	4165600	369120	735370	386940	93221	1372900	1408900	1648200	1270400	-	-	4150434	36244-87-8	-	-	--
MW0106389	D-Galactonic acid	-	-	217.031	196.058	[M-2H+Na]-	C6H12O7	360890	414010	308260	311330	187870	165520	203300	180630	421900	402460	616910	464000	2112900	2165600	2189700	1823700	918320	959980	1148800	1164600	C00880	HMDB0000565	128869	576-36-3	16534	3336	ko00052,ko01100
MW0106553	D-Pantethine	-	-	553.233	554.244	[M-H]-	C22H42N4O8S2	352820	442960	451500	709520	1104900	358030	2452400	1020200	110300	90864	108780	128390	110190	45866	65451	35635	305390	278910	327270	361630	-	HMDB0003828	452306	-	31959	-	--
MW0106794	gamma-L-Glutamylputrescine	-	-	286.141	217.143	[M+Na+HCOOH]+	C9H19N3O3	9	9	9	9	9	9	9	9	14296000	10091000	18859000	11167000	9	9	9	9	6877800	5634700	5978600	8182200	C15699	HMDB0012230	20841830	-	48005	-	ko00330,ko01100
MW0106883	Glu Ala Lys	-	-	347.195	346.185	[M+H]+	C14H26N4O6	367320	421700	280740	321730	845770	367030	972440	756190	2511900	2476100	2363900	2676300	853640	1417400	1060300	727820	1302300	1291100	1248400	1282200	-	-	-	-	-	-	--
MW0106892	Glu Asp Ile	-	-	376.173	375.164	[M+H]+	C15H25N3O8	5137700	5238600	5476600	5231100	2867000	4617300	3866400	3732800	433780	180600	517630	315560	493110	1248300	1020600	284480	1567700	1363200	1778500	1504400	-	-	-	-	-	-	--
MW0106909	Glu Ile Ser	-	-	330.165	347.169	[M+H-H2O]+	C14H25N3O7	4414700	4634100	4414100	4211800	5072700	4118600	4867300	4486200	1757400	2196300	2981200	1980200	12140000	14115000	13541000	11108000	3121200	3999600	4593600	4612200	-	-	-	-	-	-	--
MW0106912	Glu Leu Lys	-	-	371.229	388.232	[M+H-H2O]+	C17H32N4O6	484230	517990	505870	533580	550080	443460	505250	507790	626070	633280	876520	721320	2511800	4940100	3106900	2368400	819910	994050	979360	1161700	-	-	-	-	-	-	--
MW0106915	Glu Met	-	-	261.09	278.094	[M+H-H2O]+	C10H18N2O5S1	6810900	7050600	7134600	6771400	7077900	4818600	6976900	7165700	20969000	9675900	15489000	12457000	10802000	14591000	11879000	7258100	8709400	9294600	9810900	9354800	-	-	-	-	-	-	--
MW0106922	Glu Pro Lys	-	-	419.214	372.201	[M+HCOO+2H]+	C16H28N4O6	9	9	9	9	9	9	9	9	4712400	3564500	4825500	4098900	9	9	9	9	1373800	1744900	2092900	1877300	-	-	-	-	-	-	--
MW0106936	Glu Val Val	-	-	346.196	345.19	[M+H]+	C15H27N3O6	260820	241740	258920	268230	233610	155170	153800	170880	3039900	2416000	3478700	3653100	6067700	8038100	7980700	5727600	2665900	2566500	2859300	2889100	-	-	-	-	-	-	--
MW0106937	Glu-Ala	-	-	201.088	218.09	[M+H-H2O]+	C8H14N2O5	11407000	12831000	13469000	11788000	12940000	11366000	14682000	12961000	428210	447230	396540	599000	11634000	14734000	13460000	11489000	4271500	4419400	5653900	6129500	-	HMDB0003764	6992506	21064-18-6	73849	-	--
MW0106942	Glu-Asn	-	-	279.133	261.096	[M+NH4]+	C9H15N3O6	6277100	7527100	6618000	8342500	12630000	9041300	12417000	13111000	37908	57009	41596	50563	63417	200850	133540	199760	2848300	3086200	3066800	3347100	-	HMDB0028814	13655621	36314-37-1	-	-	--
MW0106961	Glu-His	-	-	267.109	284.112	[M+H-H2O]+	C11H16N4O5	2411600	2185400	2426900	2132100	2186100	2127300	2373300	1702400	4881600	3483200	7466000	5411800	7249800	9488400	6686000	6401700	3029300	2751800	2645300	3306400	-	HMDB0028821	9921875	21435-29-0	-	-	--
MW0106969	Glu-Lys	-	-	274.142	275.148	[M-H]-	C11H21N3O5	31173	47122	23644	40900	70586	30852	76608	79900	446330	398840	436800	327170	62385	79459	57387	64251	594190	478560	620960	676980	-	HMDB0004207	7015704	-	73521	-	--
MW0107077	Gly Leu Met	-	-	639.328	319.157	[2M+H]+	C13H25N3O4S1	11201	9	9	9	9	9	9	9	3955700	3330600	3590400	3801500	9	28892	9	18982	2524500	2352900	2379400	2953700	-	-	-	-	-	-	--
MW0107089	Gly Pro Glu	-	-	343.162	301.127	[M+CH3CN+H]+	C12H19N3O6	8882.6	10016	7160.3	15616	8441	13060	23138	15210	4261400	4156700	5591700	4997500	8133.1	19700	7074	20056	4393700	2998700	4355600	4361100	-	-	-	-	-	-	--
MW0107101	Gly Val Lys	-	-	366.209	302.195	[M+CH3CN+Na]+	C13H26N4O4	9	9	9	9	9	9	9	9	163300	88998	115570	161360	63549	43361	43238	48080	93856	78875	85545	84681	-	-	9817869	71227-72-0	-	-	--
MW0107105	Gly-Arg	-	-	501.234	231.133	[2M+K]+	C8H17N5O3	9	9	9	9	9	9	9	9	535780	439520	590970	446750	9	9	9	9	170210	175010	204170	220980	-	HMDB0028835	6426706	18635-55-7	-	-	--
MW0107237	Hexylglutathione	-	-	390.169	391.178	[M-H]-	C16H29N3O6S	961180	874140	953330	930460	485840	644600	341880	667000	9	9	9	9	20314	48304	42308	35029	198930	192210	236720	209680	C02886	-	97536	24425-56-7	-	-	--
MW0107250	His Gln	-	-	328.096	283.128	[M-H+2Na]+	C11H17N5O4	9	9	9	9	9	9	9	9	2560000	2330600	2530700	1883200	1035900	1213700	1090500	871270	1440500	1806900	1908100	1949700	-	-	-	-	-	-	--
MW0107257	His His Lys	-	-	465.196	420.223	[M-H+2Na]+	C18H28N8O4	9	9	9	9	9	9	9	9	4129500	4282600	4511400	4276300	9	9	9	20326	4206200	4551300	5380800	5766600	-	-	-	-	-	-	--
MW0107269	His Phe Arg	-	-	459.244	458.239	[M+H]+	C21H30N8O4	7786700	6742200	7884100	7079400	4982300	6403000	3839400	5700600	108660	81032	76390	73876	2750300	4103700	3660600	3264600	2316900	2627900	2359400	2792400	-	-	-	-	-	-	--
MW0107274	His Thr Lys	-	-	385.216	384.212	[M+H]+	C16H28N6O5	9	9	9	9	9	9	9	9	568530	443350	701860	608160	138060	193950	201290	151100	305960	252050	216510	209870	-	-	-	-	-	-	--
MW0107278	His Tyr Arg	-	-	475.241	474.234	[M+H]+	C21H30N8O5	412160	421500	477740	389800	584870	416930	539160	505630	18599	16787	14523	19253	678700	864820	732740	340940	223110	278280	294310	225430	-	-	-	-	-	-	--
MW0107280	His Val Arg	-	-	474.254	410.239	[M+CH3CN+Na]+	C17H30N8O4	1478700	1861600	1699900	2361900	3483800	1843300	3360700	2962500	9	9	9	9	154000	243350	271650	170430	605250	672550	700810	743170	-	-	-	-	-	-	--
MW0107294	His-Cys	-	-	534.19	258.079	[2M+NH4]+	C9H14N4O3S	8420200	7577600	5716300	10007000	8960900	8960300	7029600	10162000	378350	965210	381150	936140	2688600	7021200	1691700	4973900	755860	2924100	3416200	3225000	-	HMDB0028882	15294281	-	-	-	--
MW0107323	His-Phe	-	-	285.135	302.138	[M+H-H2O]+	C15H18N4O3	4161700	3854500	3744300	4656300	3971100	3273600	4337700	5221100	182640	166270	264550	217540	2728600	2790800	3430700	1699700	1763500	1808200	1817400	1836900	-	HMDB0028892	7021872	16874-81-0	-	-	--
MW0107401	Hydroxyprolyl-Isoleucine	-	-	227.138	1437.07	[M+H-H2O]+	C11H20N2O4	9	9	9	9	9	9	9	9	2091900	2293000	2479000	2409500	9	9	9	9	1364000	1560000	1594200	1357500	-	HMDB0028866	61157357	-	-	-	--
MW0107407	Hydroxyprolyl-Threonine	-	-	213.087	1451.08	[M-H2O-H]-	C9H16N2O5	120340	109800	127830	114550	141020	110640	138450	162290	15073	15280	13153	17876	84242	116030	105700	96685	48630	42954	64160	56038	-	HMDB0028873	61158058	-	-	-	--
MW0107423	Ile Ala	-	-	203.138	1507.14	[M+H]+	C9H18N2O3	66186	49017	57308	79712	67307	76383	65648	37671	2539100	1947200	2319000	2113600	1966100	2025600	2123100	1602100	1672400	1480500	1476300	1533200	-	HMDB0028900	7009577	24787-73-3	-	-	--
MW0107441	Ile His	-	-	251.152	268.154	[M+H-H2O]+	C12H20N4O3	28919000	31569000	29063000	25513000	33479000	28085000	34184000	37837000	1153300	1193100	1286700	1500800	26854000	41111000	35047000	29719000	15865000	14243000	14357000	16731000	-	-	-	-	-	-	--
MW0107478	Ile-Asn	-	-	226.12	245.138	[M-H2O-H]-	C10H19N3O4	368480	366790	361130	395790	335560	313440	355190	400650	16989	13303	9	9	318210	383410	322810	303790	128130	126230	172160	177090	-	HMDB0028902	7016079	59652-59-4	-	-	--
MW0107576	Isoleucyl-Tyrosine	-	-	606.348	402.143	[2M+NH4]+	C20H22N2O7	1218900	1347300	1089000	1484600	1759700	1131500	1642800	1926200	29609	25151	47203	34275	308000	405340	321260	180980	525070	391260	469050	538060	-	HMDB0028919	7408195	-	-	-	--
MW0107607	Kainic acid	-	-	212.1	213.1	[M-H]-	C10H15NO4	15219	21868	14145	16156	9045.2	8205.2	7901.3	11370	3497.8	2341.3	2964	9	47823	71540	57188	47442	13530	11410	15003	10811	C12819	-	10255	487-79-6	-	-	--
MW0107645	L-Agaridoxin	-	-	270.11	1451.08	[M+NH4-2H]-	C11H14N2O5	9	9	9	9	9	9	9	9	1920300	1592600	1415500	1787000	9	9	9	9	935790	580790	733790	670400	-	HMDB0029445	131750870	-	-	-	--
MW0107699	Leu Ala	-	-	185.127	202.132	[M+H-H2O]+	C9H18N2O3	2826600	2637400	2970400	2650300	2963900	2631600	2934600	2679900	233130	266140	307300	317260	3139300	3145400	3266300	2949600	1415900	1460000	1570600	1506700	-	-	-	-	-	-	--
MW0107712	Leu Asp Gly	-	-	321.176	303.143	[M+NH4]+	C12H21N3O6	122060	102320	151240	103710	142180	89174	130930	99880	146330	100930	113350	110760	868850	1387400	759830	879880	288820	366280	454620	399240	-	-	-	-	-	-	--
MW0107719	Leu Glu	-	-	261.143	260.137	[M+H]+	C11H20N2O5	5095100	5662900	5445400	5205000	5399300	5822300	6394000	8964000	764820	669560	666900	620430	101130	263970	134870	131560	1795100	1985900	1999500	1710400	-	-	22820363	-	-	-	--
MW0107745	Leu Phe	-	-	574.37	278.163	[2M+NH4]+	C15H22N2O3	1950200	2192000	1659800	2296000	2448800	1944900	3027700	2894500	37978	47393	64932	50824	771920	905740	785200	637180	763820	742980	942810	957410	-	-	-	-	-	-	--
MW0107746	Leu Phe Asn	-	-	393.209	392.206	[M+H]+	C19H28N4O5	189560	174930	237100	188140	190040	261970	221040	222920	175100	202560	248330	185620	163340	124920	187060	233590	206440	233650	197590	255510	-	-	-	-	-	-	--
MW0107747	Leu Phe Asp	-	-	394.195	393.19	[M+H]+	C19H27N3O6	9	9	9	9	9	9	9	9	396650	260330	240830	229190	9	9	9	9	147970	139110	183300	175840	-	-	-	-	-	-	--
MW0107759	Leu Thr Asp	-	-	389.203	347.169	[M+CH3CN+H]+	C14H25N3O7	9	9	9	9	9	9	9	9	984860	876010	1012700	894720	1648200	1946400	1597200	940770	486390	459390	395850	644900	-	-	-	-	-	-	--
MW0107857	Levetiracetam	-	-	171.112	170.106	[M+H]+	C8H14N2O2	1035700	1412900	1441600	1350000	1611900	1405700	1720400	1817200	165070	196820	245260	146030	1685600	2183700	1913600	1443400	749300	722660	810920	758690	C07841	HMDB0015333	5284583	102767-28-2	352567	-	--
MW0107891	Lisinopril	-	-	444.187	405.226	[M+K]+	C21H31N3O5	447160	509670	488720	712270	618070	477320	661000	771480	15286	16295	18361	26490	214380	253820	232020	164760	179230	213120	213580	336140	D08131	HMDB0001938	5362119	76547-98-3	43755	1009	--
MW0108016	Lys Pro Glu	-	-	373.208	372.201	[M+H]+	C16H28N4O6	9	9	58423	60485	119390	126260	132840	81346	1672000	1396700	1777000	1988100	51306	97398	57701	61406	1615800	1118400	1101100	1767800	-	-	-	-	-	-	--
MW0108024	Lys Trp Lys	-	-	461.286	460.28	[M+H]+	C23H36N6O4	28472000	32854000	24956000	32982000	40086000	27741000	47565000	48653000	1127700	994540	1200600	1135700	12901000	7913100	12294000	5929400	12778000	13670000	13325000	12637000	-	-	-	-	-	-	--
MW0108038	Lys-Asp	-	-	262.141	261.132	[M+H]+	C10H19N3O5	9	9	9	9	9	9	9	9	531010	484030	666600	478020	9	9	9	9	377320	414240	514620	429450	-	HMDB0028947	6426943	20556-18-7	-	-	--
MW0108041	Lys-Cys	-	-	288.076	249.115	[M+K]+	C9H19N3O3S	83435	50156	59319	70078	60647	121830	126410	141850	4150800	2567700	4041300	3406000	129500	128490	139840	110580	1325500	1532800	1514500	1731300	-	HMDB0028948	71816170	106325-92-2	-	-	--
MW0108053	Lys-Gly-OH	-	-	310.101	311.112	[M-H]-	C13H17N3O6	9	9	9	9	9	9	9	9	307550	292030	224840	322690	9	9	9	9	216430	113420	172140	181800	-	-	7022320	-	-	-	--
MW0108071	Lys-Pro	-	-	226.157	243.158	[M+H-H2O]+	C11H21N3O3	12281000	11301000	17537000	13004000	11736000	10067000	12354000	12631000	1377500	1190200	1773400	1345500	17719000	20951000	21421000	16487000	6200200	6525900	9334200	10305000	-	HMDB0028959	171204	52766-27-5	-	-	--
MW0108438	N-(4-Aminobenzoyl)-β-alanine	-	-	191.085	208.085	[M+H-H2O]+	C10H12N2O3	9	9	9	9	9	9	9	9	132390	162580	162270	128290	845680	503590	647140	442730	399470	363160	456770	523910	-	HMDB0060757	719629	7377-08-4	-	-	--
MW0108558	N1-Acetylspermidine	-	-	188.175	187.168	[M+H]+	C9H21N3O	603210	765620	569480	681240	309640	414410	291340	322500	18767000	21841000	22758000	17417000	11121000	20550000	14893000	18976000	11640000	9602200	8026100	10661000	C00612	HMDB0001276	496	-	17927	3323	--
MW0108589	N5-(1-Iminoethyl)-L-ornithine	-	-	385.193	173.116	[2M+K]+	C7H15N3O2	9	9	9	9	9	9	9	9	558920	422960	675330	512190	116100	109610	146960	122220	359520	286460	222960	233280	-	-	107984	36889-13-1	-	-	--
MW0108592	N5-Acetyl-N2-gamma-L-glutamyl-L-ornithine	-	-	605.278	1475.08	[2M-H]-	C12H21N3O6	9	9	9	9	9	9	9	9	288930	206800	261130	228030	9	9	9	9	43881	55977	60661	56460	-	HMDB0039423	131752643	-	-	-	--
MW0108623	N-Acetylglucosaminylasparagine	-	-	316.114	335.133	[M-H2O-H]-	C12H21N3O8	90742	80726	84854	114370	86724	82877	95527	111050	825940	740950	700060	685590	2529800	2767400	2440200	2175400	836960	636350	720350	830260	C04540	HMDB0000489	123826	2776-93-4	17261	5476	--
MW0108686	Nateglinide	-	-	318.207	317.199	[M+H]+	C19H27NO3	1044600	833150	1039000	1197100	973530	786930	963580	1036200	11266	4598.8	8567.4	6369.8	121800	186600	201660	103390	394000	427600	387520	449670	C12508	HMDB0014869	5311309	105816-04-4	146727	-	--
MW0108819	N-lactoyl-Tryptophan	-	-	275.105	1479.11	[M-H]-	C14H16N2O4	3486600	3577300	3351400	3634500	3680600	2884600	3768900	4100200	150470	148280	162790	167120	2759600	3754900	3195800	2427800	1498300	1454500	1582500	1584100	-	HMDB0062178	-	-	-	-	--
MW0108897	N-Palmitoyl-L-serine phosphoric acid	-	-	422.231	423.239	[M-H]-	C19H38NO7P	4907800	4036900	3993000	5588200	13341000	11821000	14940000	16910000	944340	662730	658540	920730	312020	395640	304190	236460	5830500	5744200	6019200	6219100	-	-	6610239	155915-46-1	-	-	--
MW0108917	N-Succinyl-L-glutamic 5-semialdehyde	-	-	271.093	231.074	[M-H+CH3CN]-	C9H13NO6	9	9	9	9	9	9	9	9	1364100	919320	1041900	1073300	4944800	6716600	6030700	5155600	1420300	976160	1396300	1395900	C05932	HMDB0001180	440848	-	27657	6061	ko00330,ko01100
MW0108922	N-Tigloylglycine	-	-	202.044	157.074	[M-H+2Na]+	C7H11NO3	7086700	7745700	7012300	8593000	6773900	8814000	8132200	8387000	7648500	7924300	7961300	5930600	7209500	7990900	8313000	6651800	6865400	7655600	7300000	6911100	-	HMDB0000959	6441567	35842-45-6	73018	4246	--
MW0109002	Ophthalmic acid	-	-	290.137	289.127	[M+H]+	C11H19N3O6	67057	55144	150360	86655	79667	50350	85204	93244	18741000	17602000	14398000	17261000	102440	94365	87606	80424	5948300	9968200	11005000	9819100	C21016	HMDB0005765	7018721	-	84058	-	ko00270,ko01100
MW0109070	Pentyl acetate	-	-	259.194	1310.93	[2M-H]-	C7H14O2	8124.8	6624.1	7570.6	5747.3	21850	9703.9	65681	22961	8388.1	9386.7	6653.3	11353	51845	62596	65406	45579	30807	25594	27671	27935	-	HMDB0039095	12348	-	-	-	--
MW0109115	Phe Ile Lys	-	-	424.292	406.258	[M+NH4]+	C21H34N4O4	892790	833060	1017500	879180	521420	593980	396220	662100	9	9	9	9	45176	122150	85932	107170	207730	194910	197190	209950	-	-	-	-	-	-	--
MW0109119	Phe Leu Lys	-	-	407.264	406.258	[M+H]+	C21H34N4O4	19139	32262	33832	21354	48678	33316	68090	49265	1079200	757880	1111800	839620	9965.4	9	16877	11491	669770	617840	693200	789050	-	-	-	-	-	-	--
MW0109120	Phe Lys	-	-	340.18	293.174	[M+HCOO+2H]+	C15H23N3O3	14821000	15418000	11278000	11881000	17160000	12484000	17601000	17528000	334610	365530	388970	512220	9196100	10120000	9586800	8193600	6090900	4775600	5953200	5896300	-	-	22822835	-	-	-	--
MW0109128	Phe Pro Ala	-	-	334.176	333.169	[M+H]+	C17H23N3O4	618930	544930	534290	644110	573160	542880	622120	564170	9	9	9	9	207580	247790	253190	210630	253540	199360	193270	200230	-	-	-	-	-	-	--
MW0109129	Phe Pro Glu	-	-	392.181	391.174	[M+H]+	C19H25N3O6	10675000	10702000	11338000	10033000	5509500	7308100	3978800	6512000	40334	21381	21752	30918	313040	635100	730160	514170	2371000	2450600	2460300	2860700	-	-	-	-	-	-	--
MW0109164	Phe-Gln	-	-	276.135	293.138	[M+H-H2O]+	C14H19N3O4	16991000	23825000	20627000	22825000	23567000	20899000	25506000	25271000	453050	518990	591410	500390	23052000	27640000	26137000	21070000	8515200	10285000	10991000	10569000	-	-	11779156	-	-	-	--
MW0109170	Phe-Gly	-	-	223.108	222.1	[M+H]+	C11H14N2O3	7024700	11312000	9030800	10408000	12756000	10189000	16604000	22342000	91285	70977	110620	80705	337840	319490	281280	326500	3551600	3298000	2631000	3361300	-	-	6992303	721-90-4	-	-	--
MW0109192	Phenyl dihydrogen phosphate	-	-	193.008	174.008	[M+F]-	C6H7O4P	30025	28470	30773	31483	25065	33878	35259	36359	39742	39583	41778	36251	30275	23978	32208	26885	34486	28949	35601	36127	C02734	-	12793	701-64-4	-	-	--
MW0109198	Phenylalanyl-Arginine	-	-	681.32	1549.19	[2M+K]+	C15H23N5O3	78323	79430	36125	114770	93645	32833	108200	55764	9	9	9	9	98858	94569	99576	61241	19844	23891	54561	45708	-	HMDB0028989	150903	1238-09-1	-	-	--
MW0109230	Phe-Thr	-	-	555.244	266.127	[2M+Na]+	C13H18N2O4	7240300	7639500	6531800	8220200	8499100	6570900	8614200	9584100	186910	135300	216110	204190	5774400	7004100	6873500	4993300	3221200	3137900	3129800	3847000	-	HMDB0029005	10445608	-	-	-	--
MW0109236	Phe-Tyr	-	-	311.138	328.142	[M+H-H2O]+	C18H20N2O4	1502100	1415200	1362900	1928200	1642500	1247200	1727400	1833200	21163	17535	24316	14703	351510	531150	495490	361260	452960	531130	476180	606610	-	HMDB0029007	515709	17355-18-9	-	-	--
MW0109259	Phosphonic acid, P-[(3R)-3-amino-4-[(3-hexylphenyl)amino]-4-oxobutyl]-	-	-	685.343	342.171	[2M+H]+	C16H27N2O4P	206680	260810	240530	203510	271880	150560	271340	299970	7813.9	5715.4	5246.6	12698	82518	49765	75849	39991	52944	97286	102740	98962	-	-	6857802	909725-61-7	-	-	--
MW0109280	Pirimiphos-ethyl	-	-	380.139	333.128	[M+HCOO+2H]+	C13H24N3O3PS	343090	322010	381030	439130	513090	484590	451270	504020	9	9	9	9	294920	349940	320970	263590	179760	151030	151630	72280	C19012	-	31957	23505-41-1	-	-	--
MW0109315	Pro His Arg	-	-	472.239	408.223	[M+CH3CN+Na]+	C17H28N8O4	890110	884760	1053200	926480	599950	880190	586390	763280	305500	321820	319300	393460	21241000	42565000	44609000	38999000	5351200	5118200	6514700	5871900	-	-	-	-	-	-	--
MW0109317	Pro Ile	-	-	229.154	228.147	[M+H]+	C11H20N2O3	2762200	3203300	3877500	4376000	4105400	3061700	3857900	4253600	309360	260390	399790	372020	6303700	8702800	7258500	6199600	2180900	2607100	2476800	2344000	-	-	-	-	-	-	--
MW0109329	Pro Phe	-	-	525.266	262.132	[2M+H]+	C14H18N2O3	29840000	35329000	36559000	39569000	31788000	23812000	32972000	34958000	855030	759750	801670	968100	27278000	32711000	31009000	20477000	14187000	15251000	13177000	16600000	-	-	-	-	-	-	--
MW0109331	Pro Phe Leu	-	-	376.222	375.216	[M+H]+	C20H29N3O4	13121000	14752000	12303000	13341000	15637000	10928000	16336000	13992000	380910	283270	417610	467940	3746700	6380600	4919600	3054000	4634500	4681600	5095400	5799500	-	-	-	-	-	-	--
MW0109334	Pro Ser	-	-	185.092	202.095	[M+H-H2O]+	C8H14N2O4	9143700	12051000	11368000	10213000	13006000	8912500	11940000	13729000	1085000	1073300	1203900	1225700	13995000	16773000	14995000	11269000	4723700	4915400	5297900	7371200	-	-	-	-	-	-	--
MW0109339	Pro Tyr	-	-	261.144	278.127	[M+H-H2O]+	C14H18N2O4	720670	684200	733300	684090	659880	509260	772670	492800	36256000	16917000	26331000	19623000	6843200	13969000	8211000	5140600	10396000	10703000	10858000	11507000	-	-	-	-	-	-	--
MW0109351	Pro-Asn	-	-	212.103	229.106	[M+H-H2O]+	C9H15N3O4	10056000	7795400	9865000	9684200	10964000	9519300	10176000	10406000	1067400	1101100	1069600	1237900	13306000	17683000	14625000	12431000	5059100	5453300	5704400	6205400	-	-	7408193	107856-82-6	-	-	--
MW0109360	Pro-Gln	-	-	312.117	243.122	[M+Na+HCOOH]+	C10H17N3O4	17415	9	9	9	9	9	9	9	1819500	1380500	1246900	1627100	9	9	9	9	487210	678520	908190	821490	-	-	7408110	18668-08-1	-	-	--
MW0109380	Prolylalanine	-	-	373.21	186.1	[2M+H]+	C8H14N2O3	59159	40413	70886	53544	54227	51772	54308	80589	1381700	1290300	1648600	1537100	89385	119160	93686	81300	692350	791450	677850	891190	-	HMDB0029010	44369241	-	-	-	--
MW0109396	Prolyl-Tyrosine	-	-	277.124	1549.19	[M-H]-	C14H18N2O4	9	9	9	9	9	9	9	9	356760	291610	252590	235970	4373300	4058300	4558700	4580000	2665500	2356800	2818200	3019400	-	HMDB0029029	152264	-	-	-	--
MW0109401	Pro-Met	-	-	229.1	246.104	[M+H-H2O]+	C10H18N2O3S	3979900	3754400	3282200	2995100	3418400	3138600	3627900	2763600	320010	305380	364230	328270	6117100	6471200	6449800	6084000	1916100	2266300	2384900	1986100	-	-	7408173	52899-08-8	-	-	--
MW0109429	Propyl propane thiosulfonate	-	-	227.092	1465.1	[M-H]-	C11H16O5	11887	9004.9	13958	10554	13877	15609	13462	10455	7817.6	12236	9699.3	11206	10725	11160	12221	12612	8480.4	7385.6	7025.6	11821	-	HMDB0032496	358296	-	-	-	--
MW0109436	Pro-Thr	-	-	199.108	216.111	[M+H-H2O]+	C9H16N2O4	1041400	1091700	1243400	1188200	1381400	922240	1367300	1401700	279420	220700	354160	300790	1939300	3115700	2485500	2060000	780440	721030	689030	902620	-	HMDB0029027	18218237	-	-	-	--
MW0109456	Pyridinoline	-	-	427.18	165.065	[M-H]-	C18H28N4O8	9	9	9	9	9	9	9	9	50142	49208	47748	54405	9	9	9	9	25236	24892	34163	28407	-	HMDB0000851	105068	-	88539	5814	--
MW0109630	Ser Phe Arg	-	-	409.219	408.212	[M+H]+	C18H28N6O5	214970	265450	260730	275490	320740	263760	306970	371860	1584700	1774600	2174100	1672400	691890	873480	696790	331880	651760	840360	875220	1169800	-	-	-	-	-	-	--
MW0109642	Ser Val	-	-	205.119	204.111	[M+H]+	C8H16N2O4	103090	96784	123790	82738	131470	89734	128610	102800	9167300	7264600	11138000	8695800	12215000	15561000	13669000	11428000	5365000	6917800	8746500	9454000	-	-	-	-	-	-	--
MW0109654	Ser-Cys	-	-	275.01	208.052	[M-2H+3Na]+	C6H12N2O4S	403310	356590	417100	298610	310070	350710	428400	621160	285300	261040	265830	417710	400990	697780	526000	540490	252630	331520	282350	383790	-	HMDB0029036	18218239	-	-	-	--
MW0109784	Syndesine	-	-	304.151	1376.97	[M-H]-	C12H23N3O6	9	27101	24198	15716	31607	20036	23638	37129	48626	44637	56482	44036	32574	44149	49087	30495	59114	54717	66578	53086	-	HMDB0039161	85790439	-	-	-	--
MW0109867	Thr Glu Lys	-	-	377.202	376.196	[M+H]+	C15H28N4O7	1384100	1431100	1102600	1411500	1610300	1291100	1815600	1961700	602250	564120	824250	750800	1197200	2119000	1552700	1266700	1372100	1184300	1311000	1438700	-	-	-	-	-	-	--
MW0109883	Thr Lys Glu	-	-	377.203	376.196	[M+H]+	C15H28N4O7	9	9	9	9	9	9	9	9	1770800	1522600	1905000	1763300	9	9	9	9	1468400	1101500	1243100	1559500	-	-	129753	122605-96-3	-	-	--
MW0109942	Threoninyl-Threonine	-	-	267.123	1423.05	[M+HCOO+2H]+	C8H16N2O5	2433200	2536800	2784900	2313700	2474800	2218400	2379300	2077300	4869200	4001100	9026900	5342500	6474000	10512000	7031600	6924800	3358300	2592800	3193300	3705900	-	HMDB0029071	11321969	96337-78-9	-	-	--
MW0110053	Trp Asn	-	-	654.31	318.133	[2M+NH4]+	C15H18N4O4	1173000	1315000	910680	1603400	2377900	819420	3866500	2329900	66053	56657	67595	95110	1151900	1137400	1651100	1111700	465400	669670	691080	880100	-	-	-	-	-	-	--
MW0110104	Trp-Cys	-	-	308.103	307.099	[M+H]+	C14H17N3O3S	1200600	1009200	1010600	1318700	834590	610990	1101200	880850	10998	13796	13792	13441	331250	374250	387620	298310	259980	308290	288670	436400	-	HMDB0029080	46937906	-	-	-	--
MW0110107	Trp-Gln	-	-	313.125	332.148	[M-H2O-H]-	C16H20N4O4	9	9	9	9	9	9	9	9	42833	33654	25829	28934	500320	535890	571650	516180	291500	279850	330630	381190	-	HMDB0029081	25187914	-	-	-	--
MW0110174	Tumonoic Acid A	-	-	338.231	339.241	[M-H]-	C19H33NO4	9	9	9	9	33867	22731	21265	24797	70048	68537	66648	56627	146090	210150	208900	135220	250910	194750	234730	256040	-	-	10854587	-	-	-	--
MW0110184	Tyr Ala Lys	-	-	427.218	380.206	[M+HCOO+2H]+	C18H28N4O5	1785400	2119800	2202500	2204600	1943500	1880300	2113500	1921000	1814900	1787600	1688800	1901500	47588000	62957000	66140000	46957000	11970000	11570000	10984000	11640000	-	-	-	-	-	-	--
MW0110212	Tyr Met Arg	-	-	486.254	468.215	[M+NH4]+	C20H32N6O5S1	2715400	2903900	2730500	3089000	3071900	2465400	2701900	3215300	114850	66597	93994	85590	1763200	2203500	2226100	1731400	1105000	1036100	1424400	1190400	-	-	-	-	-	-	--
MW0110217	Tyr Pro Phe	-	-	472.203	425.195	[M+HCOO+2H]+	C23H27N3O5	2105700	2324000	1923900	2297300	2062800	1638500	2485000	2695000	110640	94377	152210	118660	2317100	2476400	2504500	1871700	1043500	882070	994040	919440	-	-	4670740	72122-59-9	-	-	--
MW0110221	Tyr Ser Val	-	-	409.209	367.174	[M+CH3CN+H]+	C17H25N3O6	9	9	9	9	9	9	9	6300.2	466580	417060	614420	602420	9	9	9	9	228060	263560	276380	299870	-	-	-	-	-	-	--
MW0110223	Tyr Thr Lys	-	-	428.248	410.217	[M+NH4]+	C19H30N4O6	29756000	40942000	29158000	40857000	62491000	49502000	83470000	71089000	80792	9	9	9	497690	388930	1042800	446790	14393000	15130000	17967000	19522000	-	-	-	-	-	-	--
MW0110231	Tyr Val Gln	-	-	455.212	408.201	[M+HCOO+2H]+	C19H28N4O6	4993800	5854400	5525100	6573400	6341000	4855900	6142500	6120000	1524800	1307600	1399700	1653400	7876200	11700000	10083000	6921100	3882800	3409300	3350300	3797900	-	-	-	-	-	-	--
MW0110232	Tyr Val Lys	-	-	431.231	408.237	[M+Na]+	C20H32N4O5	184570	236610	175830	252760	342790	245750	407600	339660	7091.1	12254	14905	11811	122610	99080	134260	47641	106000	99943	78916	89677	-	-	-	-	-	-	--
MW0110287	Tyrosyl-Isoleucine	-	-	277.155	294.158	[M+H-H2O]+	C15H22N2O4	3012800	2819800	2687900	3708200	3112500	2649300	3171100	3069600	67008	53590	83286	80534	1128600	1326000	1427800	1169200	1268400	1089900	1262800	1268200	-	HMDB0029108	7019110	40829-32-1	-	-	--
MW0110292	Tyrosyl-Proline	-	-	261.124	1395.02	[M+H-H2O]+	C14H18N2O4	7461600	8607700	8265700	7831300	6100300	6809000	8310800	6915800	180350	230910	296850	272180	7907600	9779900	9600200	6946600	3950200	3581700	3887600	4092900	-	HMDB0029113	9795637	-	-	-	--
MW0110293	Tyrosyl-Serine	-	-	268.103	1395.02	[M+]+	C12H16N2O5	9438800	9860900	7067800	6750800	2260800	2530400	2730700	2971600	9373200	5099600	6933400	6789100	13043000	19840000	13093000	10541000	5951300	6829600	7906600	7686200	-	HMDB0029114	18218253	-	-	-	--
MW0110301	Tyr-Pro	-	-	277.121	278.127	[M-H]-	C14H18N2O4	322440	325510	322110	361920	305820	289500	299330	365860	9	9	9	9	59247	104650	104170	73474	85002	81509	90298	91933	-	-	11902950	51871-47-7	-	-	--
MW0110304	Tyr-Ser	-	-	284.124	268.106	[M+NH4-2H]-	C12H16N2O5	9	9	9	9	9	9	9	9	611180	498440	464640	561930	9	9	9	9	241980	210900	261830	288760	-	HMDB0029114	54564570	13588-99-3	-	-	--
MW0110317	Tyr-Val	-	-	578.316	280.142	[2M+NH4]+	C14H20N2O4	5792100	6603300	4660900	6456200	7946100	5906700	9586600	8215100	121220	58218	65543	125480	171100	171300	351960	119820	1973200	2170400	2168300	2473100	-	-	7009560	17355-09-8	-	-	--
MW0110355	Val Lys	-	-	228.171	245.174	[M+H-H2O]+	C11H23N3O3	3300200	3258700	3045200	3801800	2874100	3928500	3836900	3835400	196750	161760	183970	120070	4928900	6852100	10001000	6206300	2008000	2010600	2115300	1815600	-	-	-	-	-	-	--
MW0110362	Val Phe Lys	-	-	439.252	392.242	[M+HCOO+2H]+	C20H32N4O4	73756000	67425000	83371000	70892000	30339000	48828000	24157000	39087000	198410	117430	185000	172240	7537700	7713700	9623300	7502300	20598000	18747000	23101000	21801000	-	-	-	-	-	-	--
MW0110363	Val Pro Arg	-	-	371.243	370.233	[M+H]+	C16H30N6O4	1753300	1621700	1210100	1747300	864820	1385700	1579200	1108600	160950	116240	241500	258550	20313000	28603000	26030000	16622000	6113300	6519200	5395600	6317500	-	-	-	-	-	-	--
MW0110364	Val Pro Leu	-	-	328.223	327.216	[M+H]+	C16H29N3O4	144700000	136010000	150960000	140540000	91710000	97199000	71519000	108740000	379830	409090	342010	288610	1509700	3603400	12269000	3586300	34959000	38900000	36615000	39833000	-	-	-	-	-	-	--
MW0110375	Val Tyr Asp	-	-	413.204	395.169	[M+NH4]+	C18H25N3O7	125060	164570	133380	147690	156710	87573	158490	150300	133150	159380	162780	159850	6562300	9528500	8443700	5830200	1220600	1239200	1338300	1398400	-	-	-	-	-	-	--
MW0110396	Valganciclovir	-	-	353.15	354.165	[M-H]-	C14H22N6O5	9	9	9	9	9	9	9	9	415190	338520	362000	369380	27006	44163	33468	23837	162310	138660	164100	182250	D02495	HMDB0015548	135413535	175865-60-8	63635	-	--
MW0110451	Valyl-Serine	-	-	431.212	204.111	[2M+Na]+	C8H16N2O4	3288700	3537500	3133200	3063700	3378600	2626800	4251000	4479000	32928	9	41823	52640	162660	463750	404660	335640	1192900	1102600	1091600	1221600	-	HMDB0029136	139506	-	-	-	--
MW0110483	Zanamivir	-	-	351.135	332.133	[M+F]-	C12H20N4O7	6297500	6739800	7313400	6730900	6693300	6827500	6728700	6776300	2544100	2235600	2330900	1915800	1147100	1633100	994350	2747800	2300500	1704600	2995700	2970500	-	HMDB0014698	58753595	139110-80-8	50663	-	--
MW0110770	3-(Dimethylamino)propionic acid	-	-	257.147	117.079	[2M+Na]+	C5H11NO2	1541500	822430	1324400	1972700	2167200	2007900	3186200	1745700	117010	136400	98181	80993	18793000	14806000	32219000	22651000	3093500	2758000	2855500	3063700	-	-	25201408	-	-	-	--
MW0110977	Dehydrophytosphingosine	-	-	316.285	1451.08	[M+H]+	C18H37NO3	673000	678740	671780	806060	751550	632660	643700	544340	692060	697610	746070	720210	642980	699850	661610	659550	820200	707590	702780	811030	-	HMDB0038057	14757419	-	-	-	--
MW0110992	Dicyclohexylamine	-	-	228.195	181.183	[M+HCOO+2H]+	C12H23N	3368700	3912700	3242200	3681400	3558900	3348700	3790000	3099400	3482400	3198500	3458700	3843300	3576300	3128900	3764800	3354200	3494700	3781100	3896400	4556900	C14686	-	7582	101-83-7	-	-	--
MW0111024	Eicosapentaenoyl ethanolamide	-	-	346.272	345.267	[M+H]+	C22H35NO2	39664	33255	28758	34430	39419	37235	37058	38611	31048	30359	26067	50871	41039	44882	34579	25928	45321	33212	27382	44077	-	HMDB0013649	5283450	109001-03-8	71467	-	--
MW0111083	Memantine	-	-	226.179	179.167	[M+HCOO+2H]+	C12H21N	435760	458970	492290	434360	436870	452940	474920	425350	546700	579180	505440	487440	579130	482080	614430	483320	493620	500990	469760	552900	C13736	HMDB0015177	4054	19982-08-2	64312	-	--
MW0111163	N,N-Dimethylaniline	-	-	281.139	121.089	[2M+K]+	C8H11N	4177000	1878600	4540700	3810800	667310	631410	2347900	701450	175510	313140	293340	266690	373550	430190	340520	358320	926980	1256600	1120900	1262600	C02846	HMDB0001020	949	121-69-7	16269	5949	--
MW0111327	Tribenuron-methyl	-	-	418.081	395.09	[M+Na]+	C15H17N5O6S	129750	144250	128860	157310	130900	131400	135160	151840	6929.8	6377.9	7924.9	11166	79949	94234	107410	73248	66069	77776	72385	86786	C10962	-	153909	101200-48-0	-	-	--
MW0111798	1-Deoxy-D-xylulose 5-phosphate	-	-	248.996	214.024	[M+Cl]-	C5H11O7P	254080	140560	230850	145880	545940	548340	453550	599880	407570	565080	530520	640820	1437800	1411800	1167400	748060	951420	740660	808120	871160	C11437	HMDB0001213	443201	190079-18-6	16493	6085	ko00730,ko00900,ko01100
MW0111840	1-Methylcyclohexanol	-	-	246.244	114.104	[2M+NH4]+	C7H14O	40547000	27636000	45175000	31486000	3813800	5457800	62125000	4628400	4253300	4097300	5235200	4386000	4550500	4734300	4069600	5002600	12578000	13492000	12564000	14323000	-	HMDB0059693	11550	590-67-0	-	-	--
MW0111849	1-Palmitoylglycerone 3-phosphate	-	-	424.243	408.228	[M+NH4-2H]-	C19H37O7P	12832000	11255000	9979900	14242000	29370000	23872000	31226000	34165000	7028900	4755500	5143500	7847400	963280	1293600	978290	834580	23039000	19685000	22830000	23738000	C01192	HMDB0062190	167650	-	17868	-	--
MW0112029	2-[4-(3-Hydroxypropyl)-2-methoxyphenoxy]-1,3-propanediol 1-glucoside	-	-	417.177	1324.94	[M-H]-	C19H30O10	44826	45845	45685	41920	44245	54013	46566	42616	4624	4544.2	4786.4	4777.8	49763	55959	52671	50001	26280	29108	31103	29876	-	HMDB0040353	131752798	-	-	-	--
MW0112967	4-(Methylnitrosamino)-1-(3-pyridyl)-1-butanone	-	-	259.089	207.101	[M+Cl+NH3]-	C10H13N3O2	4890.6	5195.2	8124.1	5935.3	21043	9627	65186	18620	7686.2	8024.2	5166.2	9769.5	51403	77976	65453	49266	24691	25416	30500	30875	C16453	HMDB0011603	47289	64091-91-4	32692	-	ko00980,ko05204
MW0113148	4-Oxo-4-(3-pyridyl)butanal	-	-	200.029	163.063	[M+Cl]-	C9H9NO2	71442	79227	96733	83962	83738	88226	79209	85669	64482	71845	68453	69545	59240	53903	63740	70723	70469	63784	72510	73730	C19567	HMDB0062406	115084	76014-80-7	66879	-	ko00760,ko00980,ko01100,ko05204
MW0113558	6-[5-(2-{[3-(3,4-dimethoxyphenyl)-1-hydroxyprop-2-en-1-ylidene]amino}ethyl)-2-methoxyphenoxy]-3,4,5-trihydroxyoxane-2-carboxylic acid	-	-	532.185	533.19	[M-H]-	C26H31NO11	180910	166760	154500	206410	160170	134050	142630	189220	9	9	9	9	16587	22989	15086	15010	45107	47422	52389	52209	-	HMDB0135497	131839074	-	-	-	--
MW0113956	Bebeerine	-	-	595.284	594.273	[M+H]+	C36H38N2O6	16991	22924	15809	42371	26550	12683	37309	32966	9	9	9	9	110530	155770	155620	96100	15447	20110	19888	16462	C09352	-	12300019	477-60-1	-	-	--
MW0113978	beta-D-Fructofuranose	-	-	89.0243	180.063	[M-2H]-	C6H12O6	9	6341.4	4988.3	5439.5	6851.7	5507.2	6872	8620.2	48693	32867	23568	67175	2734.7	9	4086.6	9	13295	11675	24892	25379	C02336	HMDB0000660	439709	53188-23-1	28645	135	ko00520
MW0114056	Cellulose, microcrystalline	-	-	741.303	1465.1	[2M+H]+	C14H26O11	9	9	9	9	9	9	9	9	2316800	802970	1491900	1780800	9	9	9	9	389940	286740	390760	318250	-	HMDB0032197	14055602	-	62968	-	--
MW0114146	Cymorcin diglucoside	-	-	489.203	1409.03	[M-H]-	C22H34O12	720880	1372400	716190	1289300	3220900	1118900	3944700	2929700	51385	41119	65880	87966	191700	313800	250340	277940	520520	510040	700900	652010	-	HMDB0039386	131752626	-	-	-	--
MW0114218	D-Glucono-1,5-lactone 6-phosphate	-	-	238.993	258.014	[M-H2O-H]-	C6H11O9P	2217300	2349800	1904200	2096000	1561300	1642900	1521400	1516000	9219000	9419200	7936900	8761100	2340700	2357600	2148600	2424100	6851900	6692300	6684600	7081300	C01236	HMDB0001127	439452	-	16938	6022	ko00030,ko01100,ko01200
MW0114363	Dronedarone	-	-	555.291	556.297	[M-H]-	C31H44N2O5S	13209	6115.8	14290	9124.1	24877	46842	34274	25021	690680	467030	530050	454860	9	9	9	9	556180	618040	627100	723210	D02537	-	208898	141626-36-0	-	-	--
MW0114405	Erythritol	-	-	121.044	122.058	[M-H]-	C4H10O4	8027000	6726900	7953100	7517800	7959500	8222800	7979000	8943300	7286300	8189300	7749200	7755200	5390900	5229700	5213500	5289100	6753500	7054300	6732400	7769600	C00503	HMDB0002994	222285	149-32-6	17113	140	ko02010
MW0114413	Ethanol	-	-	131.048	46.0419	[2M+K]+	C2H6O	22199000	23202000	22167000	20831000	21200000	18687000	23071000	20325000	7151600	10079000	9649200	10122000	21735000	22134000	23774000	21660000	15636000	15469000	15474000	16326000	C00469	HMDB0000108	702	64-17-5	16236	3203	ko00010,ko01100,ko04750,ko05034
MW0114423	Ethoxyethoxyethanol	-	-	135.096	134.094	[M+H]+	C6H14O3	712580	818120	874510	674160	653280	721310	655080	519330	683580	705970	671770	635590	520080	544600	468400	542280	526190	760380	639990	445860	D08904	-	8146	111-90-0	-	-	--
MW0114582	Heptaethylene glycol	-	-	344.227	326.194	[M+NH4]+	C14H30O8	1411200	1409700	1151900	1304100	1324300	1400100	1693300	1361800	873780	696810	904680	883730	870140	999010	1038300	780070	454800	483650	483380	634820	-	HMDB0061835	79718	5617-32-3	44748	-	--
MW0114590	Hexaethylene glycol	-	-	300.202	282.168	[M+NH4]+	C12H26O7	1915800	1808600	1757000	1390900	1675000	1550800	1794600	1743100	1365900	1095500	1362400	1788000	1224000	1766800	1711400	1629600	574080	672830	503450	867680	-	HMDB0061822	17472	2615-15-8	49793	-	--
MW0114880	Monohydroxyperhexiline	-	-	294.284	1352.97	[M+H]+	C19H35NO	429980	457110	404160	542270	218660	225040	241700	281480	213850	162430	185080	233010	84244	94962	63283	45572	423310	486180	427610	419350	-	HMDB0060644	46781856	-	-	-	--
MW0114889	Muscone	-	-	285.243	238.23	[M+HCOO+2H]+	C16H30O	9	9	9	9	9	9	9	9	15626	11289	13365	11272	5324.5	9	2886.4	2765.6	31159	31581	26299	41717	-	HMDB0034181	10947	541-91-3	-	-	--
MW0115062	Oleana-1,9(11)-dien-28-oic acid, 2-cyano-3,12-dioxo-	-	-	490.291	491.304	[M-H]-	C31H41NO4	9	9	9	9	9	9	9	9	19624	13435	16209	19836	9	9	9	9	46218	67386	65727	65712	D09584	-	400010	218600-44-3	-	-	--
MW0115115	Phenethyl rutinoside	-	-	448.224	430.184	[M+NH4]+	C20H30O10	111520	110220	110990	149170	136790	106650	127580	115360	9	9	9	9	41305	46417	53926	18976	55362	46992	38539	62366	-	HMDB0032622	14312558	-	-	-	--
MW0115120	Phenyl beta-D-galactopyranoside	-	-	255.089	256.095	[M-H]-	C12H16O6	9	9	9	9	9	9	9	9	62617	46465	43474	59905	61836	68911	73364	59349	33821	26231	43192	40767	C02578	-	102336	2818-58-8	-	-	--
MW0115152	Pisatoside	-	-	242.068	1338.96	[M-H2O-H]-	C10H15NO7	9	9	9	9	9	9	9	9	7763.1	5422.1	9	9	885830	1269300	677460	933710	180790	156130	200750	188630	-	HMDB0039127	12314351	-	-	-	--
MW0115268	Semilepidinoside A	-	-	335.129	1451.08	[M-H]-	C16H20N2O6	9	9	9	9	9	9	9	9	1931.9	6222.6	7664.2	12582	245300	239790	293890	191110	73190	72317	73578	79046	-	HMDB0033107	131751375	-	-	-	--
MW0115318	Streptomycin	-	-	582.274	581.266	[M+H]+	C21H39N7O12	9	9	9	9	9	9	9	9	1011500	854880	1075400	1152400	9	9	9	9	638650	714540	621950	642360	C00413	HMDB0015214	19649	3810-74-0	17076	-	ko01100
MW0115400	trans-5-O-(4-Coumaroyl)-D-quinic acid	-	-	390.089	338.1	[M+Cl+NH3]-	C16H18O8	323060	316300	302060	322850	268450	258360	258270	334610	9	9	9	9	9	14926	19182	9	81368	68573	86270	100150	C12208	-	6441280	-	-	-	--
MW0115880	(3-amino-1H-1,2,4-triazol-5-yl)methanol	-	-	97.0451	114.054	[M+H-H2O]+	C3H6N4O	1261200	930970	772290	1005800	664460	906390	685710	704580	545810	582190	763860	950010	698650	548780	566710	666340	1605500	1581500	608390	1123600	-	-	222697	-	-	-	--
MW0115901	(3R,3aR,7aS)-3-Butylhexahydro-1(3H)-isobenzofuranone	-	-	195.139	1493.13	[M-H]-	C12H20O2	71656	61968	72750	65056	71153	69430	73638	70043	66340	68967	65035	60664	65266	63876	69579	47983	72563	63736	73462	86330	-	HMDB0034903	12367055	-	-	-	--
MW0116137	[(1S,2R,5S,7S,8R,11S,14S)-11-Hydroxy-7-(2-hydroxypropan-2-yl)-1,2-dimethyl-6-oxa-23-azahexacyclo[12.10.0.02,11.05,10.016,24.017,22]tetracosa-9,16(24),17,19,21-pentaen-8-yl] acetate	-	-	480.276	1423.05	[M+H]+	C29H37NO5	205310	180660	202970	194930	235790	194750	343310	363280	9	9	29557	36533	9	9	9	9	112850	154430	143240	111540	-	HMDB0038569	38348556	-	-	-	--
MW0116274	1-(2,3-Dihydro-1H-pyrrolizin-5-yl)-1,4-pentanedione	-	-	204.099	1451.08	[M-H]-	C12H15NO2	3756900	3605400	3928600	3969200	3821700	4000200	3974800	4262400	4153600	4030600	3943800	4214400	4625900	5041000	4603900	4624900	3736700	3735200	4366100	4542600	-	HMDB0040046	86127012	-	-	-	--
MW0116587	1,2-Bis(2-pyridyl)ethylene	-	-	183.091	182.084	[M+H]+	C12H10N2	871750	761720	1087700	1433000	2453700	1991500	3412300	2470000	281850	315460	251290	411890	1034000	1769200	1436800	1112800	838140	1263800	946220	1120800	-	-	5374802	1437-15-6	-	-	--
MW0116782	1-[3-(4-Decoxyphenoxy)-2-oxopropyl]-3-methoxycarbonylindole-5-carboxylic acid	-	-	522.248	523.257	[M-H]-	C30H37NO7	199980	153490	148500	187950	137600	137430	162020	182080	9	9	9	9	7351.5	15524	8163	8295.7	63930	61027	76275	81786	-	-	11670893	-	-	-	--
MW0117158	1-Hydroxytacrine	-	-	261.123	214.111	[M+HCOO+2H]+	C13H14N2O	9	9	9	9	9	9	9	9	5288000	4781100	5501000	5512800	9	9	9	9	2899700	3485400	3356800	3401000	-	HMDB0060963	3655	124027-47-0	-	-	--
MW0117297	1-Pyrrolidinecarboxaldehyde	-	-	98.0654	1310.93	[M-H]-	C5H9NO	9424600	8745000	9232100	9415800	9526200	10229000	10050000	9624700	9868200	10192000	9554000	9600100	9326300	10146000	8714100	9114500	9692000	9298800	9075900	9002800	-	HMDB0034587	77372	-	-	-	--
MW0119311	3-[1-[3-(Dimethylamino)propyl]-5-methoxy-1H-indol-3-yl]-4-(1H-indol-3-yl)-1H-pyrrole-2,5-dione	-	-	441.199	442.2	[M-H]-	C26H26N4O3	1886200	1989600	1857100	2064600	2120800	1573800	2196300	2346300	51225	38951	40768	58384	849480	1095900	883800	767030	622830	576630	690410	669900	-	-	3499	133053-19-7	-	-	--
MW0119893	4-(3-Pyridin-2-YL-1H-pyrazol-4-YL)quinoline	-	-	543.211	272.106	[2M-H]-	C17H12N4	9	9	9	9	9	9	9	9	181550	181870	121920	77042	9	9	9	9	30523	26194	30417	29506	-	-	447966	396129-53-6	-	-	--
MW0119986	4-(Methylnitrosamino)-1-(3-pyridyl)-1-butanol	-	-	419.241	209.116	[2M+H]+	C10H15N3O2	382240	490620	451170	524020	211730	250550	974670	207850	235660	270520	201040	284610	200220	184840	219830	224900	370070	396570	324300	421210	C19574	HMDB0041809	104856	76014-81-8	-	-	ko00980,ko05204
MW0120164	4-Acetoxy-2-hexyltetrahydrofuran	-	-	213.149	1310.93	[M-H]-	C12H22O3	9	9	9	9	9	9	9	9	18990	12782	9	9	108710	146460	80021	96664	43366	44747	53329	56793	-	HMDB0037398	61457	-	-	-	--
MW0120752	5-(2'-Carboxyethyl)-4,6-Dihydroxypicolinate	-	-	226.035	244.028	[M-H]-	C9H9NO6	66511	67583	74088	98328	70615	63566	77636	79093	9	9	9	9	58452	72016	55597	69286	26943	20769	34291	30527	-	HMDB0006794	54690914	-	-	-	--
MW0121074	5-Acetylamino-6-formylamino-3-methyluracil	-	-	245.077	226.07	[M+F]-	C8H10N4O4	9	9	9	9	39829	22849	45347	41282	30010	33543	19293	35602	17439	47443	19788	18396	28581	23505	30914	20463	C16365	HMDB0011105	108214	85438-96-6	32643	-	ko00232,ko01100
MW0121653	5-Methyl-THF	-	-	477.217	459.187	[M+NH4]+	C20H25N7O6	8558300	9987600	8362400	8740900	10285000	6730900	12808000	10735000	2905500	2576600	2650700	2562000	3138000	4194100	6323900	2893100	4260900	4605000	4557300	4642600	-	-	135415868	134-35-0	-	-	--
MW0122192	6-Hydroxy-1H-indole-3-acetamide	-	-	237.087	1409.03	[M+HCOO+2H]+	C10H10N2O2	3501500	3675800	3516100	3619300	4623100	4207400	5238900	5722000	931740	1054700	817280	1159000	34945000	54248000	38459000	34972000	6611000	7997400	8251000	8150200	-	HMDB0031173	286538	-	563250	-	--
MW0122715	Aceclidine	-	-	170.116	169.11	[M+H]+	C9H15NO2	65762	90017	124130	64470	55908	46821	79672	81242	220870	155800	111720	36452	64558	91545	141520	126620	30731	57070	34325	52409	D02750	-	1979	827-61-2	-	-	--
MW0122742	Acrimarine I	-	-	564.202	1366.99	[M-H]-	C34H31NO7	1302600	860350	770440	1261100	236070	174390	254840	303020	159700	117150	117740	164680	37961	43179	36835	29078	977590	703000	669790	698400	-	HMDB0040387	102145465	-	-	-	--
MW0122761	Aldehyde Reactive Probe	-	-	330.129	331.131	[M-H]-	C12H21N5O4S	66894	55873	63590	72724	97918	118010	127740	125040	354290	282850	346460	394500	1274200	1960300	1525600	1344500	590670	566490	569360	588340	-	-	91886087	627090-10-2	-	-	--
MW0122805	Alprazolam	-	-	309.087	308.083	[M+H]+	C17H13ClN4	3014100	2486400	2709400	3632300	4744400	3442700	4732600	5318700	85834	65240	56489	61131	124270	156670	146830	99437	1167500	1283600	1319000	1679800	C06817	HMDB0014548	2118	-	2611	-	--
MW0122904	Arachidonoylserotonin	-	-	461.319	462.325	[M-H]-	C30H42N2O2	1227900	1229200	1272200	1227600	1252300	1372200	1391100	1322900	1360700	1412300	1489400	1444000	1522500	1575300	1475800	1388300	1461400	1361800	1594100	1463400	-	-	10027372	187947-37-1	-	-	--
MW0123149	Brassica napus non-fluorescent chlorophyll catabolite 3	-	-	629.266	1409.03	[M-H]-	C34H38N4O8	36218	39395	35139	42655	36841	29432	50116	41642	9	9	9	3566.5	22620	34281	24256	14566	16533	14911	14955	12830	-	HMDB0040917	100917761	-	-	-	--
MW0123182	Butopyronoxyl	-	-	225.11	226.12	[M-H]-	C12H18O4	365970	338040	341910	351340	278490	291250	313990	325190	83386	95786	113790	99439	123270	128590	110600	116890	166910	174900	201640	226250	C19142	-	10760	532-34-3	-	-	--
MW0123196	Calcimycin	-	-	522.257	523.268	[M-H]-	C29H37N3O6	9	9	9	9	9	9	9	9	46090	27874	29078	34421	9	9	9	9	27199	26642	26495	30639	C11309	-	40486	52665-69-7	-	-	--
MW0123290	Cetylpyridinium	-	-	304.3	303.293	[M+H]+	C21H37N	15150000	95081000	31507000	52486000	302050000	297550000	289550000	326160000	1487600	1092400	688460	802960	41312000	1186000	1399700	2180300	89169000	97784000	85972000	96609000	D07666	-	2683	7773-52-6	-	-	--
MW0123569	desmethylastemizole	-	-	445.231	444.233	[M+H]+	C27H29FN4O	9	9	9	9	9	9	9	9	88460	57420	61745	71325	9	9	9	9	75886	88344	73326	86082	-	HMDB0061013	155805	73736-50-2	-	-	--
MW0123573	desmethylclomipramine	-	-	342.168	300.139	[M+CH3CN+H]+	C18H21ClN2	572160	488120	588250	565940	482710	442650	398750	433920	513580	403330	610110	572500	416750	541350	649840	526470	485930	504830	553140	703920	-	HMDB0060947	622606	303-48-0	124969	-	--
MW0123594	Diacetylfusarochromanone	-	-	375.163	1419.02	[M-H]-	C19H24N2O6	9	9	9	9	9	9	9	9	68150	53892	44196	57502	72658	53786	52193	70940	55354	47663	50435	56374	-	HMDB0038971	131752502	-	-	-	--
MW0123679	Dihydropteroate	-	-	335.092	314.113	[M-2H+Na]-	C14H14N6O3	9	9	9	9	9	9	9	9	4096.1	3782.3	5913.8	16556	213150	202880	318490	196430	81506	68108	48939	81182	C00921	HMDB0001412	135398662	-	4581	6228	ko00790,ko01100
MW0123745	DL-α-Lipoic acid	-	-	251.014	206.044	[M-H+2Na]+	C8H14O2S2	6471300	7167100	7421600	7330000	7179900	7923200	7814900	7355500	6619600	6190600	6795300	6293500	5380000	5098200	6044300	4977300	7104600	6478900	5429900	3085700	C00725	-	864	1077-28-7	-	-	--
MW0123750	Dodemorph	-	-	299.305	281.272	[M+NH4]+	C18H35NO	195020	372690	198390	1051400	2528400	2329100	2550600	2225100	22903	26191	31168	21952	35157	26336	32950	27944	546700	532250	442810	527300	C18786	-	61899	1593-77-7	-	-	--
MW0123752	Donepezil	-	-	379.212	379.215	[M+]+	C24H29NO3	333100	391200	377300	342510	326000	265350	256860	271250	441440	437730	414800	386790	406320	394050	402230	410420	380080	346470	353290	436500	D07869	HMDB0005041	3152	120014-06-4	53289	-	--
MW0123812	Ellipticine	-	-	245.107	246.116	[M-H]-	C17H14N2	413610	271420	433960	425960	1936400	981670	2800800	1783700	41969	37599	28727	22946	21583	26202	26207	20024	310310	318240	324610	346970	C09154	-	3213	519-23-3	-	-	--
MW0124096	Famprofazone	-	-	400.236	377.247	[M+Na]+	C24H31N3O	1250000	1064800	1044900	1511700	2692100	2490400	3151100	3399900	9	9	9	9	14474	27840	21061	13703	715300	731030	701660	784430	-	HMDB0041891	3326	22881-35-2	-	-	--
MW0124124	Flindersine	-	-	226.081	227.095	[M-H]-	C14H13NO2	1026500	997600	1043100	1058300	1063600	1098200	1104700	1167900	1122800	1178900	1045900	1207900	1247700	1309500	1275300	1216900	1075000	1037400	1351900	1352200	C10679	-	68230	523-64-8	-	-	--
MW0124142	Fluphenazine	-	-	438.183	437.175	[M+H]+	C22H26F3N3OS	201310	200190	203240	180280	194820	171610	218390	213820	11531	6780.5	5301.8	8762.5	65594	35573	60536	21363	116110	91994	78861	97917	C07010	HMDB0014761	3372	69-23-8	5123	-	--
MW0124434	Indoramin	-	-	695.406	347.2	[2M+H]+	C22H25N3O	94916	94916	97442	93923	105670	80762	96499	99158	9	9	9	9	483240	634760	704150	403330	101790	97134	85991	102010	D04531	-	33625	26844-12-2	-	-	--
MW0124442	Iproniazide	-	-	226.122	179.106	[M+HCOO+2H]+	C9H13N3O	2149100	2458800	2600900	2512600	1995200	2446100	2279100	1851700	2238100	2235900	2223800	2041900	1833900	1687300	1597200	1769000	2053800	2178900	1888400	1235200	C11777	-	3748	54-92-2	-	-	--
MW0124473	Isolinderanolide	-	-	335.258	1324.94	[M-H]-	C21H36O3	3600700	992520	909860	4585300	4536700	3902000	2366900	3692700	129840	49028	16650	32209	539550	1148100	476220	309970	4374700	2059800	4714600	4610300	-	HMDB0038105	24991154	-	-	-	--
MW0124676	Linagliptin	-	-	962.499	472.234	[2M+NH4]+	C25H28N8O2	2049900	2308800	1650100	2600300	3132000	1745800	3785700	3219000	47142	48860	71242	50440	570370	258700	509210	169350	657640	679590	685540	837980	D09566	-	10096344	668270-12-0	-	-	--
MW0124733	Macluraxanthone	-	-	393.134	394.142	[M-H]-	C23H22O6	957590	414970	301280	1037000	1596100	1663200	1186300	1486000	20793	11936	4334.4	7725.9	88921	204810	103450	70394	1224100	751570	1372100	1453000	C10076	-	5281646	5848-14-6	-	-	--
MW0124747	Mangiferin	-	-	423.095	422.085	[M+H]+	C19H18O11	9	9	9	9	9	9	9	9	941890	1051100	1292900	1013900	476460	642910	665530	398280	883520	922330	863790	827020	C10077	HMDB0034410	5281647	4773-96-0	6682	-	--
MW0124758	Marbofloxacin	-	-	361.137	362.139	[M-H]-	C17H19FN4O4	76369	80432	68172	87515	91742	51400	95182	115070	23048	17037	20602	22785	552230	880270	731180	433060	89377	77035	94924	99453	D08156	-	60651	115550-35-1	-	-	--
MW0124785	Mepiprazole	-	-	305.157	304.145	[M+H]+	C16H21ClN4	9	9	9	9	9	9	9	9	899350	791150	823100	957240	9	9	9	9	351180	388900	423210	327310	-	-	71897	20326-12-9	-	-	--
MW0125188	Mirtazapine	-	-	264.158	265.158	[M-H]-	C17H19N3	438220	445730	455430	465890	434540	498830	507710	515470	503090	537630	426390	529860	584320	579240	568250	564000	459530	414220	533700	481910	C07570	HMDB0014514	4205	61337-67-5	6950	-	--
MW0125198	Molinate	-	-	188.104	187.103	[M+H]+	C9H17NOS	3996200	4059200	4210600	3979500	4157200	3929900	4167600	4174800	4103600	4542700	4529200	4314000	4522500	4779200	5259700	4321900	4173100	4148300	4360300	5649400	C11086	-	16653	2212-67-1	-	-	--
MW0125355	N-(3-acetamidopropyl)pyrrolidin-2-one	-	-	183.114	1493.13	[M-H]-	C9H16N2O2	295720	309960	317500	319160	359380	294450	335930	373830	23876	20459	19789	25350	274440	374370	283170	263210	144620	139100	139030	150870	-	HMDB0061384	129397	-	133185	-	--
MW0125788	Nialamide	-	-	299.148	298.143	[M+H]+	C16H18N4O2	753670	586220	631030	1125100	523860	544910	690150	439450	261430	318090	366310	264450	455890	471330	470400	284700	401330	445300	358060	375520	D07337	-	4472	51-12-7	-	-	--
MW0125834	Nitroxoline	-	-	257.112	190.038	[M-2H+3Na]+	C9H6N2O3	1539000	1918800	1836900	1774700	2059100	2228000	1626300	2199000	2014900	2090800	1904400	1880100	1637800	1653400	1714700	1662600	1819400	1816700	1710500	721060	D07245	HMDB0015491	19910	4008-48-4	67121	-	--
MW0125835	Nizatidine	-	-	332.123	331.114	[M+H]+	C12H21N5O2S2	814910	737580	701840	853860	890720	626350	771800	799080	25070	22324	34922	28910	186070	206130	213920	137920	321240	306660	303750	253310	C07270	HMDB0014723	3033637	76963-41-2	127604	-	--
MW0125903	N-Oxyclozapine	-	-	343.129	342.125	[M+H]+	C18H19ClN4O	609630	525050	509570	836300	856410	418810	1330000	735580	633410	1064300	791890	604090	3289000	2012000	2469000	1986000	2048700	1576400	1909000	1960800	-	HMDB0060900	135445691	34233-69-7	-	-	--
MW0126017	Paliperidone	-	-	449.2	426.207	[M+Na]+	C23H27FN4O3	173320	133720	130870	114760	130090	160680	180880	158920	360430	287910	338260	347810	4993300	5422100	6045000	4147600	1028100	1039200	968700	1095800	D05339	HMDB0015396	115237	144598-75-4	83804	-	--
MW0126054	Pefloxacin N-oxide	-	-	348.134	1348.94	[M-H]-	C17H20FN3O4	931410	692970	782090	944280	892120	803540	949390	1091800	7915.5	5485.4	6799	8016.9	84440	103700	86871	71644	309670	277220	301030	345560	-	HMDB0060613	134898	-	-	-	--
MW0126095	Pheniramine	-	-	481.324	240.163	[2M+H]+	C16H20N2	9	9	9	9	9	9	9	9	242020	166510	254170	255350	9	9	9	9	253830	229210	251310	317860	D08355	HMDB0015557	4761	86-21-5	308661	-	--
MW0126232	Probenazole	-	-	287.049	223.03	[M+CH3CN+Na]+	C10H9NO3S	490010	549410	519640	571020	572600	558430	584800	593280	460540	419670	452590	457600	471240	517340	556730	483160	510410	494650	494560	621500	C18483	-	91587	27605-76-1	-	-	--
MW0126295	Pyrazine-2-carboxylic acid	-	-	125.04	124.027	[M+H]+	C5H4N2O2	5854200	6510800	6399100	6802000	6601600	7080600	7827300	6982200	9011500	8399400	9340300	8230400	5829700	4171000	5702200	5306400	7206700	5927200	6059900	7223000	C19915	HMDB0059734	1047	98-97-5	71311	-	--
MW0126399	Quinomethionate	-	-	234.999	233.992	[M+H]+	C10H6N2OS2	253360	249880	274030	285410	241190	280810	273800	266150	271210	269560	249950	232920	195000	185300	183130	174490	224110	271330	211910	161810	C14514	-	17109	2439-01-2	-	-	--
MW0126446	Rhynchophylline	-	-	385.211	384.205	[M+H]+	C22H28N2O4	1231200	1501400	1276300	1414200	1002200	1136700	1094700	1125800	971730	1403900	1330900	1256000	1261000	1178400	1299200	1457700	1249300	1134700	1332900	1296600	C09236	-	5281408	76-66-4	-	-	--
MW0126450	Riboflavin reduced	-	-	329.086	455.234	[M-H-H2O]-	C15H16N4O6	2597800	2818600	1885600	2709900	693760	799290	941270	1047700	2183300	1223200	1505000	1640400	2666700	3745100	2728500	2657600	1847300	1723500	1857500	2231200	-	HMDB0001557	22833571	-	-	6322	--
MW0126453	Riesling acetal	-	-	242.175	1451.08	[M+NH4-2H]-	C13H22O3	1356200	1394500	1502000	1405400	1422700	1334500	1367300	1431000	1748500	1773400	1519700	1505200	1664400	1568000	1573300	1671300	1424300	1289700	1666700	1738600	-	HMDB0037562	57473083	-	-	-	--
MW0126489	Rutaecarpine	-	-	286.102	287.106	[M-H]-	C18H13N3O	1865600	1776500	2001900	1926900	1911600	1966900	1972900	2073500	2056000	2145500	1871800	2123800	2254300	2282500	2282800	2168100	1951400	1847200	2274900	2438700	C09238	HMDB0042010	65752	84-26-4	-	-	--
MW0126509	Sancuso	-	-	313.198	312.195	[M+H]+	C18H24N4O	344800	339250	287310	442260	268950	337090	433590	377500	20056	12244	18951	16695	49293	60505	53835	58284	141130	164730	139420	157280	C07023	HMDB0015026	5284566	109889-09-0	154547	-	--
MW0126622	Tanakamine	-	-	218.12	1338.96	[M-H]-	C13H17NO2	331440	315780	342150	340450	313120	401170	333870	349410	341920	335020	326950	317910	314310	280480	243410	281210	327120	291980	317990	325810	-	HMDB0033429	101417302	-	-	-	--
MW0126735	Tetrahydro-L-biopterin	-	-	500.27	241.117	[2M+NH4]+	C9H15N5O3	9	9	9	9	9	9	9	9	3096200	2862600	2968800	2927700	49702000	48464000	45381000	32997000	6735000	6886200	6834300	8217300	C00272	HMDB0000027	135398654	69056-38-8	15372	5098	ko00790,ko01100,ko05418
MW0126809	Ticagrelor	-	-	523.2	522.186	[M+H]+	C23H28F2N6O4S	315950	342900	281090	328640	296000	276150	399950	333770	17470	13670	26428	16166	343900	503220	368930	383830	146760	121000	208770	195760	D09017	HMDB0015702	9871419	274693-27-5	68558	-	--
MW0126843	trans-Epoxysuccinyl-L-leucylamido(4-guanidino)butane	-	-	380.192	357.201	[M+Na]+	C15H27N5O5	594220	527190	545850	494980	587060	528540	535830	590360	4535600	3407000	4481300	3422100	22653000	28237000	23761000	18295000	4578100	4212300	5414000	5704800	C01341	-	123985	66701-25-5	-	-	--
MW0127041	β-Hydroxyethyltheophylline	-	-	242.119	224.091	[M+NH4]+	C9H12N4O3	579340	606590	743240	622310	596600	725910	758560	593340	661510	637910	724680	579190	653110	610340	752400	687220	664590	703760	672670	412380	D07933	-	1892	519-37-9	-	-	--
MW0127042	β-Lapachone	-	-	265.081	242.094	[M+Na]+	C15H14O3	1110700	1324800	1389500	1031000	692440	438760	2739800	703450	526160	530400	363600	337490	12949000	19139000	18804000	12739000	4804100	4970000	5413800	4660100	C10367	-	3885	4707-32-8	-	-	--
MW0127350	4-Hydroxyphenyl thiocyanate	-	-	150.002	151.009	[M-H]-	C7H5NOS	364580	317600	330460	339110	342400	360650	351530	373750	387510	405230	368920	362140	385160	406770	392050	398200	369920	339240	420260	371160	-	HMDB0040578	220327	3774-52-5	-	-	--
MW0127744	(+)-(1R,2R)-1,2-Diphenylethane-1,2-diol	-	-	232.136	214.099	[M+NH4]+	C14H14O2	9	9	9	9	9	9	9	9	40473	30421	39387	36866	9	9	9	9	41866	33886	37958	43364	C16015	HMDB0012111	853019	-	50014	-	--
MW0129706	1,7-Bis(4-hydroxyphenyl)-5-methoxyheptan-3-one	-	-	370.206	328.167	[M+CH3CN+H]+	C20H24O4	135420	187400	154740	143510	169900	223870	197760	177690	9790	16189	20238	19078	69880	85714	99030	81624	110260	107530	100400	142210	-	HMDB0138162	56776297	-	-	-	--
MW0130473	2',6'-Dihydroxy 4,4'-dimethoxydihydrochalcone	-	-	603.226	302.115	[2M-H]-	C17H18O5	1225100	936940	1011700	1155200	1021100	1073800	1187000	1283700	293100	337070	271420	269790	289510	338620	303370	314100	607390	537780	656150	713060	-	HMDB0140286	3084606	35241-54-4	-	-	--
MW0130684	2-{6-[2,4-dihydroxy-3-(3-methylbut-2-en-1-yl)benzoyl]-5-(2,4-dihydroxyphenyl)-3-methylcyclohex-2-en-1-yl}-5-[(E)-2-(2,4-dihydroxy-5-methoxyphenyl)ethenyl]benzene-1,3-diol	-	-	679.248	680.262	[M-H]-	C40H40O10	9	9	9	9	9	9	9	9	255420	144240	162810	180520	9	9	9	9	130390	148520	151100	151830	-	HMDB0126362	131832789	-	-	-	--
MW0130859	2-Hydroxyibuprofen	-	-	221.12	222.126	[M-H]-	C13H18O3	109840	95521	111670	96542	97438	102660	93205	90038	109660	113820	110930	104420	97792	112220	102720	97259	105130	107160	118100	121720	-	HMDB0060920	10443535	51146-55-5	133197	-	--
MW0131127	3-(3,4-Dimethoxy-5-phenylmethoxyphenyl)-5-hydroxy-6-methoxy-7-phenylmethoxy-1-benzopyran-4-one	-	-	541.177	540.178	[M+H]+	C32H28O8	2364200	1118900	2728700	2894000	349600	322390	1152900	326340	9	9	9	9	225540	249660	227160	222810	780120	749640	742220	631400	-	-	6710674	-	-	-	--
MW0133393	4',5-Dihydroxy-3',6,7-trimethoxyflavone	-	-	362.129	344.09	[M+NH4]+	C18H16O7	79560000	47141000	81723000	103810000	5666900	8605400	127490000	10278000	3317100	4134700	4086400	3740000	4153400	3777700	3664400	3561300	24330000	22247000	23051000	32232000	C10032	-	162464	41365-32-6	-	-	--
MW0133685	4-Hydroxytamoxifen	-	-	386.217	387.22	[M-H]-	C26H29NO2	9	9	9	9	9	9	9	9	109800	129450	34865	33544	9	9	9	9	30182	29670	28920	27226	C05011	HMDB0060530	449459	68047-06-3	44616	-	ko00982
MW0134037	5,7-dihydroxy-2-(3,4,5-trihydroxyphenyl)-3,4-dihydro-2H-1-benzopyran-4-one	-	-	320.076	304.058	[M-H+NH3]-	C15H12O7	662700	689680	750390	660750	671190	819180	719870	652420	1181700	1350100	1115900	1067700	758140	743850	669850	807760	949010	812770	915100	932570	-	HMDB0126033	5258991	-	25882	-	--
MW0135191	6',7'-Dihydroxybergamottin	-	-	436.181	372.157	[M+CH3CN+Na]+	C21H24O6	826860	752760	657960	918610	1392600	1302300	1487000	1423700	9	9	9	9	11798	21657	14176	10863	523220	577990	519110	544780	-	HMDB0039066	6440498	145414-76-2	-	-	--
MW0137290	Aflatoxin M1	-	-	347.066	328.058	[M+F]-	C17H12O7	321970	336250	318170	315390	302110	324590	339410	316060	297350	315020	295760	291900	292840	311720	258780	320960	309450	281940	320310	331710	C16756	HMDB0030479	15558498	6795-23-9	78576	-	ko00980
MW0137332	alpha-Cyano-(3,4-dihydroxy)cinnamide	-	-	203.049	204.053	[M-H]-	C10H8N2O3	9	9	9	9	9	9	9	9	2240200	1639500	1120500	1091700	26176	56845	19114	32591	638840	580100	646040	705000	-	-	5328768	122520-85-8	-	-	--
MW0137374	Apigenin 6,8-di-glucopyranoside	-	-	593.162	594.158	[M-H]-	C27H30O15	163850	179270	152390	175210	176400	167970	188520	185790	13563	12945	13172	13558	34854	51227	60994	39401	118110	93075	104350	100330	-	HMDB0030708	3084407	-	-	-	--
MW0137585	Carbidopa	-	-	225.09	226.095	[M-H]-	C10H14N2O4	425830	448330	421280	486700	449530	417710	471960	477130	120340	110100	122660	117480	558840	649070	555280	554910	259160	224450	259240	306120	-	HMDB0014336	2563	28860-95-9	39585	-	--
MW0137587	Carboxyibuprofen	-	-	281.073	236.105	[M-H+2Na]+	C13H16O4	447420	229300	431830	533730	152210	201270	214530	229740	473040	382910	396760	397100	49520000	62946000	62364000	47581000	4375900	4927800	5214700	6850800	-	HMDB0060564	10444113	15935-54-3	133199	-	--
MW0137708	Clausarinol	-	-	851.397	1352.97	[2M+Na]+	C24H30O6	15317000	6859000	11336000	13006000	1261900	2178100	3122600	1414000	5144200	6089500	5265400	5923900	4651200	8890400	4808000	5675000	1804000	1994800	2410300	817560	-	HMDB0041407	15293564	-	-	-	--
MW0137718	Cochliophilin A	-	-	329.065	1254.86	[M+HCOO+2H]+	C16H10O5	638060	476360	632490	665840	1083700	818560	1167900	1241300	9	9	9	9	84793	123750	117920	73625	292900	252640	280650	327070	-	HMDB0034445	927642	-	-	-	--
MW0138149	Ferocaulidin	-	-	397.205	396.194	[M+H]+	C24H28O5	4609700	4127900	4384400	5636800	3080300	4176200	3819500	3917900	2189400	1488800	1577300	1958900	1545300	2849800	1442500	1394700	1571000	1709600	1615200	2126700	-	HMDB0039042	3725594	-	-	-	--
MW0138362	Herbacetin	-	-	303.056	302.043	[M+H]+	C15H10O7	9	9	9	9	9	9	9	9	158880	239550	252870	414320	130460	137410	144350	112470	547370	564680	581940	673420	C02806	-	5280544	527-95-7	-	-	--
MW0138577	Ivermectin B1a	-	-	873.497	874.508	[M-H]-	C48H74O14	1043700	706070	652570	1065600	818730	891180	1264500	1300400	12334	15306	12538	12777	16836	19070	13891	20430	141190	108750	191550	173830	-	-	6321424	71827-03-7	-	-	--
MW0138770	Licochalcone A	-	-	339.154	338.152	[M+H]+	C21H22O4	27701	27687	32405	24502	18023	21966	15053	12043	22176	17219	20075	23415	11549	24525	25561	21347	15588	16522	17448	15307	-	-	5318998	58749-22-7	-	-	--
MW0138968	Minocycline	-	-	456.18	457.185	[M-H]-	C23H27N3O7	205800	200360	192690	216380	261640	189690	275270	282940	8321.8	7742.7	6980.1	8323.7	219790	285640	226930	185720	97676	95972	103800	102060	C07225	HMDB0015152	54675783	10118-90-8	50694	-	--
MW0139218	Osthole	-	-	245.109	244.11	[M+H]+	C15H16O3	1116400	904490	1200400	1289700	5355900	2642800	7665800	4796100	94826	95605	97733	71367	66480	71138	66432	53627	898940	856120	774650	796780	C09280	-	10228	484-12-8	-	-	--
MW0139633	Salvianolic acid A	-	-	513.119	494.121	[M+F]-	C26H22O10	154030	155640	168310	172850	156160	183850	176980	174600	146930	163020	146840	114890	84452	80007	66561	78050	164930	121580	126370	109620	C10492	-	5281793	96574-01-5	-	-	--
MW0139667	Schizandrin	-	-	415.211	432.215	[M+H-H2O]+	C24H32O7	9159600	5292900	11657000	13440000	1844900	2826700	5772800	2836900	1822700	2180100	2109200	1657600	2282800	2414400	2290000	1502200	3021600	3345900	3086700	3687900	C17064	-	23915	7432-28-2	-	-	--
MW0139832	Tigecycline	-	-	586.288	585.28	[M+H]+	C29H39N5O8	1674400	1663600	1508300	1759700	1672700	1498000	1768000	1672000	44615	41072	46836	72764	628520	479930	597140	358590	631100	571540	722770	658840	C12012	HMDB0014700	54686904	220620-09-7	149836	-	--
MW0139960	Wuweizisu C	-	-	431.168	384.157	[M+HCOO+2H]+	C22H24O6	9	9	9	9	9	9	9	9	82664	55991	66863	53304	52289	65584	65842	24033	196640	205690	220040	222280	-	-	119112	61301-33-5	-	-	--
MW0140187	(10S)-Juvenile hormone III acid diol	-	-	310.198	270.183	[M-H+CH3CN]-	C15H26O4	9	9	9	9	9	11934	9	9	38914	24937	35026	29719	41708	56573	47893	30933	73712	74244	56593	75059	C16506	-	23724772	-	-	-	ko00981
MW0140192	(11S,13S)-3-Amino-5,12,13,14-tetrahydroxy-14-(hydroxymethyl)-8,10-dioxa-2-aza-4-azoniatetracyclo[7.3.1.17,11.01,6]tetradec-3-en-9-olate	-	-	318.098	319.102	[M-H]-	C11H17N3O8	6701.9	8733.9	4884.4	7275.3	6447	8362.3	8546.7	8005.2	99428	107360	95418	85343	303060	341640	303830	559280	332920	274550	379020	340260	C11692	-	443368	4368-28-9	-	-	--
MW0140227	(1R,6R)-6-Hydroxy-2-succinylcyclohexa-2,4-diene-1-carboxylate;(1R,6R)-2-Succinyl-6-hydroxy-2,4-cyclohexadiene-1-carboxylate;SHCHC	-	-	280.088	240.063	[M-H+CH3CN]-	C11H12O6	98870	97958	108770	97314	92712	117900	104980	99311	77252	91147	81580	79136	54661	41436	49485	59631	75374	69508	89664	91612	C05817	-	5287432	-	-	-	ko00130,ko01100
MW0140438	(5-Formylfuran-3-yl)methyl phosphate;2-Furaldehyde phosphate;4-HFC-P;4-(Hydroxymethyl)-2-furancarboxaldehyde phosphate	-	-	242.948	205.998	[M+K-2H]-	C6H7O6P	1017100	1290100	960390	1222900	1188200	969710	1302300	1265500	308250	241520	288800	268890	2789200	3985200	3750700	3170400	937620	873520	835100	1122000	C20954	-	25244336	-	-	-	ko01100
MW0140534	(E)-4-Hydroxyphenylacetaldehyde oxime;(E)-[4-Hydroxyphenylacetaldehyde oxime]	-	-	303.137	151.063	[2M+H]+	C8H9NO2	9	9	9	9	9	9	9	9	330250	455470	434760	343810	2163200	1380500	1591200	1540800	1103100	881240	1280200	1425900	C04350	-	5460411	-	-	-	ko01100,ko01210
MW0140756	[3-Hexadecanoyloxy-2-(9-oxononanoyloxy)propyl] 2-(trimethylazaniumyl)ethyl phosphate	-	-	720.448	719.437	[M+H]+	C36H66NO11P	30372	23893	34380	42088	13939	24487	44544	22546	12986	23167	17003	12126	30664	21892	11480	9627.1	17156	19573	15348	30448	-	-	11273762	439904-34-4	-	-	--
MW0141214	10-Deacetyl-2-debenzoylbaccatin III	-	-	219.091	440.205	[M-2H]-	C22H32O9	154870	214100	175920	184980	74333	88882	129540	88724	135550	207500	204160	175790	43517	43351	35327	39467	92949	85242	112090	117950	C11899	-	443489	-	-	-	ko01100
MW0141236	10-Propoxydecanoic acid	-	-	229.179	230.188	[M-H]-	C13H26O3	21152	25434	21116	24258	23115	23801	50521	27007	87172	75199	64845	77845	119660	169070	159270	95668	108280	106310	121490	145150	-	-	122098	119290-12-9	-	-	--
MW0141334	12-Ethyl-8-isobutylbacteriochlorophyllide d	-	-	615.282	616.29	[M-H]-	C36H40MgN4O4	9	9	9	9	9	9	9	9	458870	284770	313840	297610	9	9	9	9	392790	411000	432180	487620	C21434	-	124201684	-	-	-	ko00860
MW0141345	12-trans-Hydroxy juvenile hormone III	-	-	281.173	282.183	[M-H]-	C16H26O4	8676100	7305800	9416600	9140100	13742000	14754000	14831000	17466000	924100	1021900	1039900	1069100	950200	1022400	829040	841240	5006800	4582300	5254700	5626100	C16508	-	11011465	-	-	-	ko00981
MW0141372	13-Azaprostanoic acid	-	-	312.291	311.282	[M+H]+	C19H37NO2	12736	17424	14905	12988	9	9	9	9	8582.8	3651.9	9	7535.6	967930	1544600	1450400	1262400	218630	193590	203130	206840	-	-	123640	71629-07-7	-	-	--
MW0141377	13-Desoxyterpendole I	-	-	897.496	437.257	[2M+Na]+	C27H35NO4	2633500	1935300	1673600	3014500	2279700	2250600	2502600	4438500	13539	10186	11519	9939	8613.2	23052	9973.5	14692	419990	440100	389000	496770	C20542	-	72734302	-	-	-	--
MW0141395	14,15-EE-5(Z)-E	-	-	340.284	324.266	[M+NH4-2H]-	C20H36O3	61432	38379	61163	89773	160060	103330	167860	167690	1837.4	1965.3	2026	2613.9	12931	20592	17590	11653	46752	36333	38308	39853	-	-	53394468	519038-92-7	-	-	--
MW0141401	14alpha-Hydroxy-5beta-cholest-7-ene-3,6-dione;Diketol	-	-	397.309	414.313	[M+H-H2O]+	C27H42O3	9	9	9	9	9	9	9	9	76792	60964	80948	72815	56770	79849	65933	48781	102330	106410	76761	117700	C16509	-	15081546	-	-	-	ko00981
MW0141431	15-Demethoxy-epsilon-rhodomycin	-	-	570.215	571.205	[M-H]-	C29H33NO11	20904	15314	16758	28830	448430	454130	405130	548770	14647	25602	21289	30300	81590	74216	62015	52263	426100	511610	371060	387590	C18641	-	53297393	-	-	-	--
MW0141449	15-Oxo-beta-bilirubin	-	-	597.243	598.243	[M-H]-	C33H34N4O7	9	9	9	9	9	9	9	9	508830	383080	379750	402600	9	9	9	9	481850	409400	497330	513540	C20667	-	71627164	-	-	-	--
MW0141493	16-Oxo-palmitate	-	-	269.211	270.219	[M-H]-	C16H30O3	224950	186640	222490	233520	376880	400220	495380	501350	42405	31118	32891	32228	23987	50213	26456	23349	151270	164250	183400	190470	C19614	-	15931626	-	-	-	ko01100
MW0141512	17,20Hydroxyprogesterone sulfate	-	-	411.188	412.192	[M-H]-	C21H32O6S	17548	18438	16443	21728	17681	15393	20617	16513	18204	14372	14200	21914	942570	1077600	1021100	830400	152230	155440	159420	171560	-	-	46782782	138949-80-1	-	-	--
MW0141607	17-Hydroxylupanine	-	-	285.16	264.184	[M-2H+Na]-	C15H24N2O2	257150	261680	285480	294880	164600	243690	216840	269550	17903	12769	7988.2	12769	15435	18820	12693	12603	139140	160610	178390	184070	C20233	-	71448976	-	-	-	--
MW0141637	17-phenyl trinor Prostaglandin F2 cyclopropyl amide	-	-	428.279	427.272	[M+H]+	C26H37NO4	9	9	9	9	9	9	9	9	1199700	920060	1028800	910590	9	9	9	9	1165200	1237300	1197200	1273900	-	-	-	-	-	-	--
MW0141649	17-trifluoromethylphenyl-13,14-dihydro trinor PGF2	-	-	457.225	458.228	[M-H]-	C24H33F3O5	32097	17079	17400	10761	17584	15732	22740	16596	13648	16785	14207	12936	16058	21445	22175	15673	23955	18153	28391	24494	-	-	-	-	-	-	--
MW0141658	18-Oxooleate	-	-	295.227	296.235	[M-H]-	C18H32O3	140580	116750	140420	139880	192770	205850	195200	250050	11786	13066	11503	10643	10928	9605.7	8986.4	11092	79541	69200	67953	74402	C19617	-	56928100	-	-	-	--
MW0141812	1-Oleoyl Lysophosphatidic Acid(sodium salt)	-	-	435.252	436.259	[M-H]-	C21H41O7P	3555100	2314600	2805900	3221600	7230000	7995200	10233000	10122000	1623900	541970	284990	143520	443030	471130	383140	369810	2719200	1832000	1966200	2022200	-	-	44159357	22556-62-3	-	-	--
MW0141840	1-Stearoyl-2-Docosahexaenoyl-sn-Glycero-3-[Phospho-rac-(1-glycerol)]	-	-	845.531	822.541	[M+Na]+	C46H79O10P	159250	129250	159560	129500	142340	162300	153310	157130	137650	178270	164790	156680	152380	233480	194780	177610	133390	163730	161160	146110	-	-	-	-	-	-	--
MW0141968	2,3,4,5-Tetrahydrodipicolinate;delta1-Piperidine-2,6-dicarboxylate;L-2,3,4,5-Tetrahydrodipicolinate;(S)-2,3,4,5-Tetrahydropyridine-2,6-dicarboxylate	-	-	154.041	171.053	[M+H-H2O]+	C7H9NO4	14992000	17986000	16967000	20744000	13903000	21183000	21179000	20852000	18132000	17817000	17722000	14160000	17951000	18401000	18948000	16702000	15224000	18759000	16080000	17154000	C03972	HMDB0012289	440179	-	32976	-	ko00261,ko00300,ko01100,ko01230
MW0142030	2',4,4',6'-Tetrahydroxychalcone 4'-O-glucoside;THC 4'-glucoside;Chalconaringenin 4'-glucoside;2',4,4',6'-Tetrahydroxychalcone 4'-O-beta-D-glucoside	-	-	216.049	434.121	[M-2H]-	C21H22O10	231790	250420	218270	237840	120860	128400	127290	144890	681190	638610	496680	469900	1749000	1775400	1637400	1735400	641170	583600	774860	812480	C16407	-	23724744	-	-	-	--
MW0142082	2,5-Dideoxy-2,5-imino-D-mannitol	-	-	184.06	163.084	[M+Na-2H]-	C6H13NO4	41568	38297	32303	40502	16571	19378	18036	12627	1973100	2019800	1756800	1802300	67906	38775	99693	140690	1567500	1694800	1840100	1886200	C10143	-	124702	59920-31-9	-	-	--
MW0142233	2-Amino-5-oxohexanoate	-	-	163.112	145.074	[M+NH4]+	C6H11NO3	16818000	13727000	14837000	12114000	9047900	9937000	9727200	7378200	12040000	16773000	14362000	15115000	10290000	8045500	9048600	7876600	6256500	6108700	5981900	7043600	C05825	-	440805	-	-	-	ko00310,ko01100
MW0142238	2-Aminoacridone;AMAC	-	-	209.068	210.079	[M-H]-	C13H10N2O	157810	155500	174170	169340	158060	157130	152530	160160	173260	166500	160400	156550	140090	136980	160150	164780	148370	138480	157190	157810	C12143	-	121965	27918-14-5	-	-	--
MW0142400	2-Hydroxy-6-oxoocta-2,4,7-trienoate	-	-	187.039	168.042	[M+F]-	C8H8O4	74096	69649	62067	60213	58274	80145	118610	101770	6820.3	5811.4	4859.8	3466.2	3799.6	5670.1	3773.9	4359	29117	27238	31705	28478	C07087	-	5281013	-	-	-	ko01100
MW0142705	3,5-Dichloro-4-hydroxyphenylpyruvate	-	-	246.963	247.964	[M-H]-	C9H6Cl2O4	154250	170140	172550	168730	180280	192070	175100	192260	155780	160460	155650	119190	100140	107320	84275	93074	161790	141000	122920	129030	C04323	-	440297	-	-	-	--
MW0142794	3alpha,7alpha-Dihydroxy-12-oxo-5beta-cholanate	-	-	405.259	406.272	[M-H]-	C24H38O5	9	9	9	9	9	9	9	9	59818	42118	56939	55265	32323	49556	45999	34118	76542	63856	80706	78037	C01292	HMDB0000400	439472	-	16312	5389	--
MW0142831	3beta-Cyclopentyl-5alpha-androstan-17beta-ol	-	-	345.31	344.308	[M+H]+	C24H40O	950050	1067500	1081600	1154400	1188200	1119600	1171600	1187100	1060700	1107600	1130100	1071700	1178800	1403600	1314600	1162500	1148900	1164900	1185500	1299100	C14979	-	246162	-	-	-	--
MW0142931	3-Geranylgeranylindole;3-(Geranylgeranyl)indole	-	-	388.305	389.308	[M-H]-	C28H39N	9	9	9	9	9	9	9	9	200630	138250	177500	160310	119050	124600	159040	78932	134360	163500	91335	143130	C20525	-	5374226	-	-	-	ko01100
MW0142966	3-hydroxyandrost-5-en-17-one sulfate	-	-	367.155	368.166	[M-H]-	C19H28O5S	6423200	4899700	5521200	5472900	783940	845850	951490	1109000	7412.2	8617	13931	19752	18579	40320	12212	57343	1106800	922780	605630	576870	-	-	-	-	-	-	--
MW0143186	4,4'-Diapolycopenedial	-	-	429.285	428.272	[M+H]+	C30H36O2	751300	669860	758500	800080	771170	730300	753650	713880	732510	853910	715630	797200	856910	720360	764860	687850	699870	739990	821140	799500	C19798	-	11102033	-	-	-	--
MW0143225	4,5-seco-Dopa	-	-	248.055	229.059	[M+F]-	C9H11NO6	289700	244860	236730	302810	124410	128140	142290	174650	9848	9315.1	8792.7	7955.3	88006	136130	134980	93862	102350	99634	115170	121680	C17758	-	14803858	-	-	-	--
MW0143230	4-[(1-Oxo-7-phenylheptyl)amino]-(4R)-octanoic acid	-	-	346.236	347.246	[M-H]-	C21H33NO3	2630200	1664700	2453800	3848700	9046500	5367600	8734300	9373300	53514	28216	30751	29744	934790	1338800	1197900	702740	1826200	1658400	1922800	1895500	-	-	44563080	1101136-50-8	-	-	--
MW0143305	4-Epiminocycline	-	-	473.21	457.185	[M+NH4-2H]-	C23H27N3O7	6057800	6592300	5451500	6747300	7719700	5479900	8056200	8351200	157100	128610	167400	167440	731400	1045500	1635900	1017400	2113300	1915300	2329400	2208600	-	-	54749602	43168-51-0	-	-	--
MW0143396	4-Methylburimamide	-	-	225.124	226.125	[M-H]-	C10H18N4S	9	9	9	9	9	9	9	9	53957	48618	53178	55281	9	9	9	9	30633	31483	32831	33748	C11801	-	3084972	-	-	-	--
MW0143431	4-O-beta-D-Mannopyranosyl-D-glucopyranose	-	-	379.083	342.116	[M+Cl]-	C12H22O11	9	9	9	9	9	9	9	9	169170	150000	191470	206400	31140	40661	32441	26617	152430	123530	143050	149200	C20236	-	10450027	-	-	-	--
MW0143471	5 -CHOLANIC ACID-3 , 12 -DIOL N-(2-SULPHOETHYL)-AMIDE	-	-	498.288	499.297	[M-H]-	C26H45NO6S	9	9	9	9	9	9	9	9	140350	130220	130210	141910	63119	73021	66356	49864	44504	38227	47637	46220	-	-	-	-	-	-	--
MW0143561	5-Amino-6-(1-D-ribitylamino)uracil;5-Amino-6-(D-ribitylamino)uracil;6-(1-D-Ribitylamino)-5-amino-2,4-dihydroxypyrimidine;6-(1-D-Ribitylamino)-5-aminouracil;4-(1-D-Ribitylamino)-5-amino-2,6-dihydroxypyrimidine	-	-	313.055	276.107	[M-2H+K]-	C9H16N4O6	781240	741060	842330	892960	874040	719340	835110	789610	38676	27049	42704	44816	276600	364500	317820	266160	323220	248460	335200	276710	C04732	HMDB0011106	193516	-	15934	-	ko00740,ko01100
MW0143636	5-Hydroxyindolepyruvate	-	-	254.028	219.053	[M+Cl]-	C11H9NO4	27746	23202	28437	25884	20289	14917	57955	21450	9	9	9	9	355920	433830	364160	330360	90721	85845	83444	96311	C05646	-	440742	-	-	-	ko00380,ko01100
MW0143788	6beta-Hydroxy-17beta-estradiol;6beta-Hydroxyestradiol-17beta	-	-	304.193	288.173	[M-H+NH3]-	C18H24O3	84195	56404	75022	87898	117810	77104	112410	125550	9	9	9	9	12594	18915	18268	11844	32314	33215	34785	33031	C03935	-	440168	-	-	-	ko00140
MW0143867	6Naltrexol	-	-	342.168	343.178	[M-H]-	C20H25NO4	9	9	9	9	9	9	9	9	52835	27865	44120	45310	1193500	1362900	1249100	1451300	196430	128610	198500	211700	-	-	5486554	49625-89-0	-	-	--
MW0143998	7-Oxodehydroepiandrosterone 3-acetate	-	-	367.183	344.199	[M+Na]+	C21H28O4	5583700	3729600	4212300	5765300	3603000	4071400	4122300	4364200	68976	58764	64376	78045	44846	63446	63421	55144	1149700	1122200	1039700	1196900	-	-	9798229	1449-61-2	-	-	--
MW0144024	8,9-EE-14(Z)-E	-	-	325.274	324.266	[M+H]+	C20H36O3	8998000	8992100	7703500	9278800	3451800	4243700	4311300	4736700	3640800	2710200	2740100	3655700	983990	1310700	1018500	801960	7387000	8916400	7540300	7609300	-	-	-	-	-	-	--
MW0144100	9(S)-HEPE	-	-	301.223	318.219	[M+H-H2O]+	C20H30O3	773150	760600	707020	980240	756420	671300	839320	949010	39512	46125	46726	51706	544990	773940	714440	601400	361360	402350	374550	470090	-	-	53394252	-	-	-	--
MW0144111	9,10-Dihydroxystearate	-	-	315.253	316.261	[M-H]-	C18H36O4	25330	21586	24521	26452	36524	33424	29961	41400	191670	129890	163140	124570	89729	120950	122080	90161	234670	234140	244410	263070	C08314	-	89377	120-87-6	-	-	--
MW0144177	9-Riburonosylhypoxanthine	-	-	303.029	282.06	[M+Na-2H]-	C10H10N4O6	30777	22155	26840	24957	39123	60197	39056	45143	114750	106740	113530	135680	428210	654610	522790	432600	187790	181310	225060	245430	C11631	-	135438607	-	-	-	--
MW0144246	Acetoxy-8-gingerol	-	-	431.176	364.225	[M-2H+3Na]+	C21H32O5	9	9	9	9	9	9	9	9	1856700	1511900	2102600	2426400	200930	116600	285250	99942	1124300	610320	926920	934610	-	-	-	-	-	-	--
MW0144288	Aclacinomycin S;L-2-Deoxyfucosyl-L-rhodosaminyl-aklavinone	-	-	698.286	699.289	[M-H]-	C36H45NO13	1049700	742310	736360	774390	812020	930440	990240	423030	179300	204620	180420	255350	676640	862340	666560	617230	1049700	1092800	1069800	1154600	C18635	-	152639	-	-	-	--
MW0144314	Ac-Ser-Asp-Lys-Pro	-	-	486.216	487.228	[M-H]-	C20H33N5O9	9	9	9	9	9	9	9	9	771360	603060	627830	771600	9	9	9	9	347860	292780	394980	424690	-	HMDB0062552	-	-	-	-	--
MW0144351	Acylated phloroglucinol	-	-	830.576	406.272	[2M+NH4]+	C24H38O5	9	9	9	9	9	9	9	9	21618	15653	12764	15666	9	9	9	9	19598	28891	22218	25771	-	-	-	-	-	-	--
MW0144428	AGC	-	-	298.142	299.156	[M-H]-	C15H25NO3S	206450	200810	189940	249430	217050	172320	245360	261290	142780	88641	91227	105770	1729200	2107800	1781100	1281100	352580	321380	342220	356480	-	-	-	-	-	-	--
MW0144435	Agrimophol	-	-	473.216	474.225	[M-H]-	C26H34O8	5926800	4065500	6612800	7297600	2160700	3153800	5732900	2606600	2290100	2175400	1868700	1993600	2310100	2797200	1720000	1909000	1429500	1567800	1627100	1939400	C10671	-	442901	65792-05-4	-	-	--
MW0144486	Ala Asn Arg Val Thr	-	-	560.31	559.308	[M+H]+	C22H41N9O8	322210	509770	283820	469230	848160	644310	860330	791990	9	9	9	9	726570	2300100	1922300	1302200	523910	386080	537050	560540	-	-	-	-	-	-	--
MW0144496	Ala Asn Ile Lys	-	-	491.284	444.27	[M+HCOO+2H]+	C19H36N6O6	565590	651450	1395900	1336400	4135400	1227000	12455000	2977100	373410	341390	425210	551960	161720	185910	283470	95051	2074000	2188900	2517700	3229300	-	-	-	-	-	-	--
MW0144498	Ala Asn Lys Glu Asn	-	-	575.275	574.271	[M+H]+	C22H38N8O10	3471800	3675400	3117100	4512800	4023300	2815100	4321600	4411800	97050	78736	118540	150970	1963700	2364300	2712400	1567100	1443000	1567200	1460400	1585500	-	-	-	-	-	-	--
MW0144518	Ala Asp Phe Asp	-	-	467.175	466.17	[M+H]+	C20H26N4O9	934480	1196600	1101900	1235500	1319700	702270	1354400	1254100	91681	103530	100810	128630	1020600	1340700	1424300	945690	762940	924980	771940	761320	-	-	-	-	-	-	--
MW0144519	Ala Asp Ser Glu	-	-	419.14	420.149	[M-H]-	C15H24N4O10	9	9	9	9	9	9	9	9	358700	270990	215890	235910	9	9	9	9	154150	136090	161940	185060	-	-	-	-	-	-	--
MW0144558	Ala Glu Gln	-	-	393.159	346.149	[M+HCOO+2H]+	C13H22N4O7	9	9	9	9	9	9	9	9	1011900	1096900	1445700	1047400	9	9	1957.3	15659	428650	379220	353770	562670	-	-	-	-	-	-	--
MW0144576	Ala Glu Val Asp	-	-	431.181	432.186	[M-H]-	C17H28N4O9	9	9	9	9	9	9	9	9	62936	56777	65521	60929	9	9	9	9	30219	25528	32593	28562	-	-	-	-	-	-	--
MW0144582	Ala Gly Leu Val Ser	-	-	463.29	445.254	[M+NH4]+	C19H35N5O7	376670	508940	401510	518260	371230	568430	660150	634320	9	9	21792	30932	159040	108520	180750	37654	184070	180990	167150	203780	-	-	-	-	-	-	--
MW0144604	Ala His Tyr Glu	-	-	517.214	518.213	[M-H]-	C23H30N6O8	1447100	1886600	1480500	2000100	1808800	1213500	2139400	1972300	86034	41125	44743	71779	2165700	3393800	2509200	2163200	837330	739240	978510	1262000	-	-	-	-	-	-	--
MW0144704	Ala Pro Ala	-	-	258.144	257.138	[M+H]+	C11H19N3O4	170720	218670	184620	183680	180810	202490	192660	218650	166820	172280	137790	133290	149550	156560	168580	130670	180310	174240	167500	133110	-	-	-	-	-	-	--
MW0144717	Ala Pro Met	-	-	657.272	317.141	[2M+Na]+	C13H23N3O4S1	13329000	18083000	17136000	14836000	17967000	11872000	17861000	16535000	616860	571500	691290	733150	16308000	22711000	18657000	12319000	5907900	8008300	7957300	8808600	-	-	-	-	-	-	--
MW0144747	Ala Thr Ile Lys	-	-	432.28	431.274	[M+H]+	C19H37N5O6	1474800	1515200	1581800	1482600	1726400	1633700	2157500	1943200	1098000	1141400	1172100	842640	1222600	787060	931590	843530	498660	746440	522480	846040	-	-	-	-	-	-	--
MW0144757	Ala Thr Val Glu	-	-	419.211	418.206	[M+H]+	C17H30N4O8	9	9	9	9	9	9	9	9	1952600	2486400	2512700	2860500	31447	26864	32343	20989	734980	972890	1221300	1063600	-	-	-	-	-	-	--
MW0144788	Ala Val Ala Ile Gln	-	-	501.295	500.296	[M+H]+	C22H40N6O7	159300	149760	183730	137490	202020	253250	223610	187770	186480	179040	154340	123090	217070	269520	159060	283250	248160	159340	187300	176700	-	-	-	-	-	-	--
MW0144792	Ala Val Asp Asp	-	-	417.163	418.17	[M-H]-	C16H26N4O9	17677	16158	13949	21685	18969	18231	14948	20384	9	9	9	9	134010	147500	145980	135950	71642	69573	82963	80418	-	-	-	-	-	-	--
MW0144796	Ala Val Glu	-	-	318.165	317.159	[M+H]+	C13H23N3O6	48223	19567	38041	14903	35467	19945	29395	53410	5538400	3958200	4900200	4946500	6991400	7443400	6595400	5924100	3929300	3719000	4040900	3973900	-	-	-	-	-	-	--
MW0144802	Ala Val Leu Glu	-	-	429.232	430.243	[M-H]-	C19H34N4O7	9	9	9	9	9	9	9	9	490760	409550	359060	445960	9	9	9	9	159250	115070	164940	184000	-	-	-	-	-	-	--
MW0144848	Ala-Trp	-	-	274.12	275.127	[M-H]-	C14H17N3O3	985190	961040	918610	1168000	1037300	860910	1078000	1192300	21741	16381	20174	20700	757130	952630	785860	714820	362750	350770	410620	443610	-	-	85362	-	-	-	--
MW0145001	alpha-Tocopherol acetate;Tocopherol acetate	-	-	473.395	472.392	[M+H]+	C31H52O3	9	9	9	9	9	9	9	9	41314	34054	35879	43705	12605	13964	11797	8013	63006	70320	75767	62218	C13202	-	86472	7695-91-2	-	-	ko04977
MW0145045	AM-Toxin I	-	-	446.228	445.221	[M+H]+	C23H31N3O6	2006300	1776800	1605600	2259100	5132100	4505200	5126400	6193700	365370	291200	317220	398210	124760	185640	135890	117370	2228300	2496000	2449400	2172000	C16786	-	3035206	53193-10-5	-	-	--
MW0145125	Anhydrorhodovibrin	-	-	584.474	566.449	[M+NH4]+	C41H58O	1543500	1312500	1298200	1509600	1388600	1433600	1550600	1531700	1741200	1549300	1720700	2081900	1654700	1620100	1809700	2552300	1259700	1267900	1570700	1867000	C15877	-	5368308	-	-	-	ko01100
MW0145133	Ankorine	-	-	334.2	335.21	[M-H]-	C19H29NO4	2850200	1993500	2491400	3067100	3893600	2721900	4101900	4537100	21271	10343	15115	12782	183150	266140	229970	169210	983440	892190	1004300	1089000	C09337	-	442166	13849-54-2	-	-	--
MW0145271	Arg Asn Gln Glu	-	-	544.247	545.256	[M-H]-	C20H35N9O9	368460	413100	364370	479700	429830	302930	453720	527790	6206.8	4727	4357.7	8467.3	127880	110640	144440	73419	134590	103490	133640	147020	-	-	-	-	-	-	--
MW0145273	Arg Asn Gly	-	-	387.21	345.176	[M+CH3CN+H]+	C12H23N7O5	388000	383970	451840	337760	366590	318130	334710	375170	446980	391490	364310	489110	424730	381930	383550	472570	367220	418250	356790	446980	-	-	-	-	-	-	--
MW0145320	Arg Gln Asn	-	-	417.222	416.213	[M+H]+	C15H28N8O6	51775	44612	41216	21436	9	9	9	9	368530	386870	460260	441970	258580	500920	516200	471870	318980	340640	349340	337680	-	-	-	-	-	-	--
MW0145356	Arg Glu Trp	-	-	490.257	489.234	[M+H]+	C22H31N7O6	125750	122390	115330	132140	453420	419920	602740	562040	164680	122190	106410	172900	78155	109510	77929	78219	542960	653280	583800	574210	-	-	-	-	-	-	--
MW0145363	Arg Gly Leu	-	-	345.222	344.217	[M+H]+	C14H28N6O4	9	9	9	9	13327	31954	10343	17998	1151800	1104100	979480	650600	30330	51438	25523	33435	649920	577850	648440	722020	-	-	-	-	-	-	--
MW0145382	Arg Ile Ala Glu Glu	-	-	617.328	616.318	[M+H]+	C25H44N8O10	13532000	16291000	12061000	15762000	16802000	10165000	16238000	17669000	226580	215630	274530	309310	4572600	3353200	4654000	2570900	4176100	4129900	4291700	5760300	-	-	-	-	-	-	--
MW0145386	Arg Ile Asp Asp	-	-	518.258	517.25	[M+H]+	C20H35N7O9	4099800	4603500	4306600	4660700	4586100	3209900	4997000	4993200	96752	76234	108440	104620	5018700	6498800	6264000	4515500	2628500	2533000	2577100	2850600	-	-	-	-	-	-	--
MW0145418	Arg Leu Leu Asn Asn	-	-	629.364	628.366	[M+H]+	C26H48N10O8	2375000	2454300	2154200	3002200	2386700	1992600	2884600	2788400	69582	33577	54425	67119	813280	760730	835340	577050	642820	815070	838860	1022800	-	-	-	-	-	-	--
MW0145438	Arg Lys His Arg	-	-	596.378	595.367	[M+H]+	C24H45N13O5	26494	28719	14686	21806	19023	13528	33033	33001	9	9	9	9	2683.8	11166	4275.3	5367	5733.6	8426.6	11045	16681	-	-	-	-	-	-	--
MW0145452	Arg Met Met	-	-	437.194	436.193	[M+H]+	C16H32N6O4S2	2251800	1804300	2753200	2850000	556940	781700	1243600	675540	1289300	1245400	1236500	1417200	1234200	1574000	1250100	1201000	941340	952770	878350	1187600	-	-	-	-	-	-	--
MW0145459	Arg Phe Asn Ala His	-	-	644.327	643.319	[M+H]+	C28H41N11O7	9	9	9	9	9	9	9	9	1405800	1199100	1490300	1703500	9	9	9	9	843750	806960	754380	934000	-	-	-	-	-	-	--
MW0145477	Arg Pro Asp	-	-	404.222	386.191	[M+NH4]+	C15H26N6O6	126270	62915	130050	185470	15343	15339	532590	37652	9521.4	9894.5	13010	8198	15534	14036	10646	10749	46298	49363	36635	84453	-	-	-	-	-	-	--
MW0145502	Arg Ser Ser	-	-	349.183	348.176	[M+H]+	C12H24N6O6	268280	224520	228090	296480	285220	169390	297010	230570	9	5126.6	9	9	107780	91516	113500	70236	64695	37361	57724	43347	-	-	-	-	-	-	--
MW0145505	Arg Ser Tyr	-	-	425.215	424.207	[M+H]+	C18H28N6O6	5670800	5376300	5352800	5554500	5213700	5164000	4962200	3610500	5254300	5190500	5421300	4995000	4976200	5203400	5064000	5076800	5309100	4802900	4860300	4786500	-	-	-	-	-	-	--
MW0145509	Arg Thr Ala Arg	-	-	520.334	502.298	[M+NH4]+	C19H38N10O6	840940	908880	891320	976950	1272100	925160	1323800	1312700	816410	1076200	828350	863440	876110	638790	651300	651500	513780	435670	483510	702320	-	-	-	-	-	-	--
MW0145551	Arg Tyr Thr Glu	-	-	568.27	567.265	[M+H]+	C24H37N7O9	9	9	9	9	9	9	9	9	399350	237310	467420	455980	9	9	9	9	230710	210930	189170	206610	-	-	-	-	-	-	--
MW0145573	Arg Val Ser Leu Asp	-	-	635.337	588.323	[M+HCOO+2H]+	C24H44N8O9	6607100	7310200	5705800	8466300	6502900	5629400	8649900	8684600	193780	199400	152770	182770	18279000	20688000	25800000	14833000	4332300	4129300	4550500	5718700	-	-	-	-	-	-	--
MW0145662	Asn Ala Leu Ala His	-	-	523.251	524.271	[M-H]-	C22H36N8O7	168530	174500	159270	192560	196130	156640	224220	236740	9	9	9	9	60913	87413	76479	56034	52360	47943	76261	70565	-	-	-	-	-	-	--
MW0145672	Asn Arg Glu Ser Leu	-	-	618.325	617.313	[M+H]+	C24H43N9O10	284940	362430	226530	390780	490110	227440	550050	456400	21718	12335	28839	21069	128940	59726	131290	64006	138830	120990	154270	162190	-	-	-	-	-	-	--
MW0145673	Asn Arg Gly	-	-	346.181	345.176	[M+H]+	C12H23N7O5	20549	39410	30712	37255	22337	32009	35369	28617	34318	36079	37241	44599	40503	36272	35454	26225	38448	37163	26215	31968	-	-	-	-	-	-	--
MW0145679	Asn Arg Phe Lys	-	-	562.311	563.318	[M-H]-	C25H41N9O6	540650	440410	386420	444710	868030	961040	1157700	1182400	28696	14691	23413	17867	29135	61916	37842	35497	216690	330560	315280	366520	-	-	-	-	-	-	--
MW0145703	Asn Asp Leu Asp	-	-	474.182	475.191	[M-H]-	C18H29N5O10	9	9	9	9	9	9	9	9	144610	131370	165910	148600	179760	332120	313600	215370	94870	95887	117640	96107	-	-	-	-	-	-	--
MW0145728	Asn Gln Ser	-	-	348.149	347.144	[M+H]+	C12H21N5O7	1541500	1209700	1656900	2109900	2246300	2027700	2081500	2295600	9541.4	5091.4	5613.8	8625.3	864290	1033000	892510	749210	517560	486520	450530	193330	-	-	-	-	-	-	--
MW0145733	Asn Gln Val Lys	-	-	488.285	487.275	[M+H]+	C20H37N7O7	9135600	6266000	6963600	6432700	4700600	6112300	4223900	7154900	87894	118890	145470	174420	3135200	2898200	3074400	2643900	1300800	2479700	2350400	2407200	-	-	-	-	-	-	--
MW0145779	Asn His Val Asp	-	-	482.205	483.208	[M-H]-	C19H29N7O8	201480	176040	164860	227060	384960	364130	451280	417060	132270	88451	86384	140750	21470	28092	20636	16329	311880	308140	342570	406950	-	-	-	-	-	-	--
MW0145793	Asn Ile Lys Asp	-	-	489.269	488.259	[M+H]+	C20H36N6O8	18644000	17784000	17998000	15871000	10288000	11806000	11018000	14712000	100490	89137	82984	94002	3733800	2546100	4104200	2511400	4656500	4626100	5438200	6350700	-	-	-	-	-	-	--
MW0145812	Asn Leu Lys Asp	-	-	487.257	488.259	[M-H]-	C20H36N6O8	981010	787610	854510	904680	643660	742020	491370	748480	6229.5	5841.7	3909.2	5891.1	165280	145810	207260	126180	253210	255970	279480	273040	-	-	-	-	-	-	--
MW0145822	Asn Lys Ala Val Gly	-	-	488.286	487.275	[M+H]+	C20H37N7O7	8750300	10737000	8729800	14054000	13684000	7333800	13330000	11525000	376580	348330	513360	447010	4917600	5103800	5957200	4638800	5455800	5019100	5016500	5022700	-	-	-	-	-	-	--
MW0145835	Asn Lys Phe Asp	-	-	523.253	522.244	[M+H]+	C23H34N6O8	136940	181330	148390	143850	240330	93360	191220	164560	22761	43962	36425	58638	3505500	10216000	7021100	7057600	1081700	1039100	1267100	1283400	-	-	-	-	-	-	--
MW0145864	Asn Phe Ser Arg	-	-	523.26	522.255	[M+H]+	C22H34N8O7	1415900	1623400	1104100	1197200	1072100	1046400	1458800	1434100	40306	50347	51660	88689	739960	872750	865830	600260	485850	535460	544560	506650	-	-	-	-	-	-	--
MW0145888	Asn Ser Leu Arg	-	-	487.268	488.271	[M-H]-	C19H36N8O7	5410.5	9	4826.3	4177.8	9	9	9	9	1133500	881910	856070	828930	10176	12432	9862.4	11476	1032500	970130	1135300	1186500	-	-	-	-	-	-	--
MW0145900	Asn Thr Gln Glu	-	-	489.2	490.202	[M-H]-	C18H30N6O10	104190	120060	100630	107770	120300	90835	138940	155690	9	9	9	9	28934	56320	60887	42911	33849	34924	42616	37883	-	-	-	-	-	-	--
MW0145959	Asn Val Phe Lys	-	-	507.297	506.285	[M+H]+	C24H38N6O6	2220300	2018900	2005600	2312900	2241200	1847700	1957200	2081800	2083200	1860700	2088400	2053100	2367500	2269100	2439400	2232700	2242000	2086200	2225600	1940500	-	-	-	-	-	-	--
MW0145971	Asn-Asp-OH	-	-	354.061	355.065	[M-H]-	C13H13N3O9	764410	761630	631850	547550	372080	331710	407300	366030	192770	164970	157570	137790	789740	665150	811670	853710	454430	488850	406400	463850	-	-	-	-	-	-	--
MW0145982	Asn-Leu	-	-	244.13	245.138	[M-H]-	C10H19N3O4	9	9	9	9	9	9	9	9	209370	200630	189100	229070	123410	164820	111460	143450	127070	106820	115560	104880	-	HMDB0028735	-	-	-	-	--
MW0146007	Asp Ala Leu Arg Thr	-	-	575.313	574.307	[M+H]+	C23H42N8O9	1002800	987670	996830	762580	573270	553180	434440	748060	9	9	9	9	168340	248080	231370	284070	362780	464730	410530	491860	-	-	-	-	-	-	--
MW0146012	Asp Ala Thr Glu	-	-	435.17	434.165	[M+H]+	C16H26N4O10	7982700	7985900	8025100	9838000	9996700	10857000	11712000	12537000	9	9	9	9	103570	200730	46643	91683	3186400	3341100	3482200	3110200	-	-	-	-	-	-	--
MW0146040	Asp Asn Ile	-	-	361.172	360.165	[M+H]+	C14H24N4O7	2682000	2450600	3248500	2804100	3674400	3238600	3029500	3525400	735320	683600	643360	628680	566990	506370	282550	171070	1320900	1708600	1728100	2253100	-	-	-	-	-	-	--
MW0146093	Asp Gln Val Leu Ser	-	-	561.287	560.281	[M+H]+	C23H40N6O10	13149000	15496000	14602000	17595000	18682000	14417000	21482000	18912000	45928	9	29768	49114	1376000	2980500	4007000	2000500	6236400	5346400	6365400	7025500	-	-	-	-	-	-	--
MW0146102	Asp Glu Leu	-	-	376.173	375.164	[M+H]+	C15H25N3O8	9	9	9	9	9	9	9	9	1097300	1336200	1233600	1198400	405890	468170	434340	313550	615990	749110	892830	721660	-	-	-	-	-	-	--
MW0146158	Asp Ile Thr	-	-	348.176	347.169	[M+H]+	C14H25N3O7	44328	56613	62113	56610	109510	112660	118090	123730	6620600	6334100	8312300	7039500	230860	244360	232860	202850	3192000	2598800	3665700	3600000	-	-	-	-	-	-	--
MW0146164	Asp Leu Ala Glu	-	-	445.192	446.201	[M-H]-	C18H30N4O9	9	9	9	9	9	9	9	9	45201	50429	42296	52192	794210	1088600	828070	753920	130030	122110	144310	150560	-	-	-	-	-	-	--
MW0146173	Asp Leu Lys Asp	-	-	490.253	489.243	[M+H]+	C20H35N5O9	8622600	7351500	7348500	9562600	8617800	9228900	9364400	11045000	47823	14232	24696	26896	159530	269740	202880	158260	3236400	3202900	3277700	3021900	-	-	-	-	-	-	--
MW0146176	Asp Leu Phe Arg	-	-	548.284	549.291	[M-H]-	C25H39N7O7	117810	98263	56863	116810	69048	49434	56088	88327	34417	17247	19735	28576	178360	177620	182640	165190	69103	73872	46675	88214	-	-	-	-	-	-	--
MW0146177	Asp Leu Ser	-	-	334.161	333.154	[M+H]+	C13H23N3O7	92122	85508	100530	68005	184660	116560	208130	213950	6446900	5785800	6795300	6705400	9	9	9	9	2758600	3123400	3390500	3299200	-	-	-	-	-	-	--
MW0146210	Asp Met Leu Asp Leu	-	-	606.278	605.273	[M+H]+	C25H43N5O10S	9	9	9	9	20318000	20932000	21199000	25933000	2042300	2321600	1641400	2742500	3678300	4097800	3873500	3158500	26184000	26458000	26153000	21097000	-	-	-	-	-	-	--
MW0146227	Asp Phe Ser Arg	-	-	522.235	523.239	[M-H]-	C22H33N7O8	613990	728100	558450	537020	646820	591000	587010	560050	611360	529880	539230	616010	234100	280550	252510	188060	648220	662480	570600	751530	-	-	-	-	-	-	--
MW0146238	Asp Pro Gly	-	-	288.12	287.112	[M+H]+	C11H17N3O6	99208	131630	129380	131600	262640	65259	236540	112440	1954000	1048600	2102800	1471000	278790	304590	348390	210220	550300	762130	1016300	922350	-	-	-	-	-	-	--
MW0146246	Asp Pro Thr Ile Glu	-	-	574.262	573.265	[M+H]+	C24H39N5O11	1841800	2061900	1487900	2047100	2596500	1712400	2505500	2340300	46523	55633	52175	44075	672150	864580	711640	598290	722730	782840	833120	857430	-	-	-	-	-	-	--
MW0146311	Asp Val Ala	-	-	286.14	303.143	[M+H-H2O]+	C12H21N3O6	9	9	9	9	9	9	9	9	15155000	13305000	20070000	13823000	9	9	9	9	8181700	7364200	6982800	9634800	-	-	-	-	-	-	--
MW0146360	Asp-Lys	-	-	284.122	261.132	[M+Na]+	C10H19N3O5	5821400	6078600	4432200	5554000	1273800	1507600	1338900	1688300	1689200	744730	873220	1048600	2426500	3019000	2532200	1821500	1915200	2042300	2044900	2016300	-	HMDB0004987	6427003	5891-51-0	73829	-	--
MW0146461	Avermectin A1b;Avermectin A1a, 25-de(1-methylpropyl)-25-(1-methylethyl)-	-	-	871.485	872.492	[M-H]-	C48H72O14	8504.7	4446.2	4627.6	14849	38191	30435	43123	58196	9	9	1867	2569	9	9	9	9	27173	28214	23337	22055	C11968	-	102093852	65195-52-0	-	-	ko01100
MW0146503	Azomycin;2-Nitroimidazole	-	-	160.043	113.022	[M+HCOO+2H]+	C3H3N3O2	9	9	9	9	9	9	9	9	1304000	3156000	3915700	4558900	1902400	812750	504060	449640	1285000	1257400	1540600	1772200	C14531	-	10701	527-73-1	-	-	--
MW0146662	beta-D-Mannosyl-1,4-N-acetyl-D-glucosamine;4-O-beta-D-Mannopyranosyl-N-acetyl-D-glucosamine	-	-	364.117	383.143	[M-H-H2O]-	C14H25NO11	9	9	9	9	9	9	9	9	43394	39347	96854	161390	9	9	9	9	107710	88423	113670	94127	C20887	-	71297235	-	-	-	--
MW0146690	beta-Paxitriol;10beta-Hydroxypaxilline	-	-	875.512	437.257	[2M+H]+	C27H35NO4	916760	538470	460490	894330	819540	594010	1023800	1451400	9	9	9	9	9	9	9	9	236550	239300	202880	188120	C20593	-	57347662	-	-	-	--
MW0146818	Boc-Pro-Phe(NMe)-Gly-OMe	-	-	895.478	447.237	[2M+H]+	C23H33N3O6	85532	57961	49311	106910	264450	238390	324390	419330	23945	16910	17306	34207	9	9	9	9	214730	246540	166930	159800	-	-	-	-	-	-	--
MW0147474	Chymostatin	-	-	608.311	607.312	[M+H]+	C31H41N7O6	367920	425500	352450	449860	422470	307180	507100	491710	9	9	13721	7735.6	50149	9	52973	9	151820	107650	153570	148130	C11308	-	443119	9076-44-2	-	-	--
MW0147502	Cinncassiol C2	-	-	729.39	364.189	[2M+H]+	C20H28O6	5764200	6376900	5682500	6013300	6118600	4648700	6685100	6084100	939010	526350	672340	601950	2779100	3173300	4276200	2060800	2696300	2765600	2897000	3033400	C17642	HMDB0035168	46173965	-	-	-	--
MW0147653	Clavamycin D	-	-	314.136	315.143	[M-H]-	C13H21N3O6	9	9	9	9	9	9	9	9	703430	553870	615270	593850	23045	23542	21117	25932	216050	187700	227770	257150	C17364	-	46173892	103059-95-6	-	-	--
MW0147686	CMP-8-amino-3,8-dideoxy-beta-D-manno-octulosonate;CMP-Kdo8N	-	-	589.137	542.126	[M+HCOO+2H]+	C17H27N4O14P	9	9	9	9	9	9	9	9	432080	183400	430180	267820	9	9	9	9	172690	72621	136980	108930	C21334	-	122361367	-	-	-	--
MW0147833	Crocin II	-	-	813.325	814.326	[M-H]-	C38H54O19	318760	283330	237950	314680	296120	257640	341730	325690	9065.2	5114.2	5458.1	6636.3	120070	130990	126910	90146	105610	75487	107170	99905	C17513	-	9940690	55750-84-0	-	-	ko01100
MW0147859	Cucurbic acid	-	-	228.161	212.141	[M+NH4-2H]-	C12H20O3	28222	33859	30553	25117	32131	26801	32261	33988	40234	34111	29419	31198	42880	30761	39936	29251	34360	30348	31929	34746	C08482	HMDB0029388	5281159	58240-50-9	-	-	--
MW0147947	Cyclooctat-9-en-7-ol;(1S,3aS,4R,7S,9aS,10aS)-1,4,9a-Trimethyl-7-(propan-2-yl)-1,2,3,3a,4,5,7,8,9,9a,10,10a-dodecahydrodicyclopenta[a,d][8]annulen-4-ol	-	-	342.263	290.261	[M+Cl+NH3]-	C20H34O	9	9	9	9	9	9	9	9	66860	40006	54647	57398	38145	57268	44651	34609	62917	66507	80199	74158	C20834	-	86289538	-	-	-	ko01100
MW0148167	D-beta-Phenylalanine;(S)-3-Amino-3-phenylpropanoate	-	-	166.085	165.079	[M+H]+	C9H11NO2	244150	185000	209090	258140	241690	227220	258930	290340	9	9	9	9	48436	67499	54898	27933	97918	92608	66660	121230	C20488	-	686704	-	-	-	--
MW0148197	Decylubiquinone;6-Decylubiquinone;2,3-Dimethoxy-5-methyl-6-decyl-1,4-benzoquinone	-	-	321.207	322.214	[M-H]-	C19H30O4	9752900	7668200	7984300	9449700	7745500	9493900	8897200	10194000	200590	162990	188250	146210	89818	181420	129230	118500	2778000	3043300	2831600	2555600	C15494	-	2971	55486-00-5	-	-	--
MW0148264	Demethylphylloquinol	-	-	437.342	438.35	[M-H]-	C30H46O2	11286000	8872100	8696900	10794000	11172000	9963400	13142000	14007000	45077	11587	17484	20069	200570	400000	286700	266250	3761200	3258300	3770900	4066900	C21084	-	15927131	-	-	-	ko00130,ko01100
MW0148308	D-Erythrulose 1-phosphate	-	-	234.976	200.009	[M+Cl]-	C4H9O7P	1435000	1461200	1498600	1365700	1202500	1297900	1209500	1160100	1915400	2191700	1924100	2081600	2036600	1853800	1951400	1885000	1427700	1509500	1629700	1875800	C21285	-	152153	-	-	-	--
MW0148320	Desmethyl-betahistine(2-(2-aminoethyl)pyridine)	-	-	123.096	122.084	[M+H]+	C7H10N2	2619800	3007000	2905500	2793400	2871800	3379900	3032500	3162800	3219900	3494600	3602000	3381400	3350300	3074100	3470900	3571500	3466000	3571100	3583800	3656900	-	-	75919	2706-56-1	-	-	--
MW0148363	D-Glucosaminate-6-phosphate;2-Amino-2-deoxy-D-gluconate 6-phosphate	-	-	256.022	275.041	[M-H2O-H]-	C6H14NO9P	406660	415820	483410	501230	465430	422140	512320	525070	51618	54855	85478	67241	1167200	1408100	1091000	1207600	290310	250560	249430	245810	C20589	-	71728452	-	-	-	ko00030
MW0148399	Diacetyl-10-gingerdiol	-	-	437.287	436.282	[M+H]+	C25H40O6	4922800	4630400	5258300	4627700	5229800	3882300	4099200	4584200	4358000	5112200	4969600	4045600	5398200	4323800	4167000	3463700	5089100	4971700	3563300	5125700	-	-	-	-	-	-	--
MW0148400	Diacetyl-8-gingerdiol	-	-	409.259	408.251	[M+H]+	C23H36O6	1070200	1197800	1177800	973390	879020	948470	742450	738750	1244400	1509700	1632200	1474700	1570300	1490600	1728400	1503000	1018100	957320	1013700	1106600	-	-	-	-	-	-	--
MW0148486	DIHYDRO- -TUBAIC ACID	-	-	235.101	236.105	[M-H]-	C13H16O4	23152000	23204000	23734000	24622000	24791000	25046000	25358000	26976000	28013000	27578000	25987000	25344000	26934000	28748000	26876000	28460000	24754000	24222000	29033000	26545000	-	-	-	-	-	-	--
MW0148512	Dihydromethanophenazine;2-(Dihydropentaprenyloxy)-dihydrophenazine	-	-	541.397	540.408	[M+H]+	C37H52N2O	264110	319570	312350	252450	272570	333720	334170	390350	235450	172480	219500	188510	302680	367120	383010	402480	324400	275530	321680	256720	C11904	-	5281993	-	-	-	--
MW0148590	Diprenorphine	-	-	851.514	425.257	[2M+H]+	C26H35NO4	272230	174480	154440	330150	964610	903840	1002000	1462700	52670	37203	40490	82646	9	9	9	9	664850	612720	574070	439380	C11794	-	443408	14357-78-9	-	-	--
MW0148591	Diprotin B	-	-	404.131	327.216	[M-H+2K]+	C16H29N3O4	2933600	2678500	2922100	2863700	4407500	3103700	4351600	4139100	15012	9	9	9	19942	46802	35316	29224	961700	1000100	991370	1098400	-	-	146208	-	-	-	--
MW0148615	di-trans,poly-cis-Undecaprenyl phosphate;Undecaprenyl phosphate;ditrans,octacis-Undecaprenyl phosphate	-	-	422.327	846.665	[M-2H]-	C55H91O4P	2797300	2187200	2149500	3036200	6523800	5697900	7290500	8303800	11801	5529.2	3244.6	5466.5	127610	206560	134170	121630	1531200	1431000	1582800	1637300	C17556	-	5283548	-	-	-	--
MW0148895	Endomorphin-1	-	-	626.315	610.29	[M+NH4-2H]-	C34H38N6O5	470250	438830	455610	520560	527260	380820	524990	562660	18819	10603	18796	20107	44673	13357	30136	13646	177060	167530	191380	168080	-	HMDB0005773	-	-	239449	-	--
MW0148930	Enterostatin human	-	-	560.292	496.276	[M+CH3CN+Na]+	C21H36N8O6	11306000	13927000	9419700	10938000	13647000	8196200	15288000	13380000	352110	315000	526780	468300	6454800	11109000	11407000	7519700	3793300	4696000	5014100	6107100	-	HMDB0006117	3082883	117830-79-2	-	-	--
MW0149020	Estramustine phosphate sodium	-	-	579.124	563.098	[M+NH4-2H]-	C23H30Cl2NO6P. 2Na	9	9	9	9	9	9	9	9	45775	44008	38164	49151	19770	20911	16446	10876	12641	7657.5	18849	11673	C13031	-	444000	52205-73-9	-	-	--
MW0149062	Etorphine	-	-	412.264	411.241	[M+H]+	C25H33NO4	3730000	3408200	3199600	4705800	8097400	6628400	8202800	8885300	468680	340580	415230	505300	38145	78256	49837	37863	3233100	3298000	3190600	3225900	C11793	-	644209	14521-96-1	-	-	--
MW0149291	Fructoselysine	-	-	360.15	308.158	[M+Cl+NH3]-	C12H24N2O7	5478.4	6056	9550.4	7278.5	27418	18740	97034	28923	18405	29091	23394	41053	8527.4	5474.3	7531.4	4161.6	27729	26452	35580	35692	C16488	-	9839580	-	-	-	--
MW0149294	Fruticosonine	-	-	359.235	312.22	[M+HCOO+2H]+	C20H28N2O	1299700	964970	1318300	1612600	3635000	2447400	3363200	3303000	26021	17265	22726	14827	144830	198340	193680	125500	785880	870150	904930	1125000	C09191	-	442091	73326-88-2	-	-	--
MW0149384	Gal1-3Gal1-4GlcSp	-	-	572.195	573.202	[M-H]-	C20H35N3O16	384130	366120	384350	427500	416350	354260	421490	450750	9	9	9	9	107300	158640	138010	121830	72797	63943	118990	109740	-	-	-	-	-	-	--
MW0149445	gamma-L-Glutamyl-L-cysteinyl-beta-alanine	-	-	320.092	321.099	[M-H]-	C11H19N3O6S	9	9	9	9	9	9	9	9	3768900	1679800	2261700	1826300	44943	41750	40245	46897	792120	728050	847240	843630	C04544	-	440380	-	-	-	--
MW0149468	Ganoderic acid H	-	-	571.285	572.299	[M-H]-	C32H44O9	86293	72056	77499	95211	89613	80206	90680	101930	1213800	663880	821270	848300	10434	12547	10889	8910.5	535970	567530	628940	695870	-	HMDB0035987	-	98665-19-1	-	-	--
MW0149598	GlcNAc1-3Gal1-4GlcNAcSp	-	-	654.245	655.255	[M-H]-	C24H41N5O16	9	9	9	9	9	9	9	9	53807	30009	36498	36580	9	9	9	9	28507	24451	26888	31273	-	-	-	-	-	-	--
MW0149609	Gln Ala Gln Ile Glu	-	-	588.302	587.291	[M+H]+	C24H41N7O10	2509900	2369200	2012700	2263000	2619900	1697700	3325300	3635300	84670	102140	78911	210930	20863000	39038000	27596000	24553000	4201300	4722700	4769800	5986300	-	-	-	-	-	-	--
MW0149665	Gln Gln Gln Glu Gln	-	-	660.295	659.287	[M+H]+	C25H41N9O12	233070	141620	150420	113710	207970	228120	301700	235170	192790	165430	195750	208610	344770	303160	314530	316610	212360	219390	248790	370540	-	-	-	-	-	-	--
MW0149683	Gln Glu Leu Glu	-	-	516.229	517.238	[M-H]-	C21H35N5O10	153950	179470	146960	192730	183700	137200	220600	247090	6399.8	6073.6	6252.1	7391.6	114660	156750	122520	88552	75634	59265	81477	97532	-	-	-	-	-	-	--
MW0149705	Gln His Phe Arg	-	-	587.304	586.298	[M+H]+	C26H38N10O6	9	9	9	9	9	9	9	9	473990	480650	452050	574190	9	9	9	9	245340	331210	303650	317890	-	-	-	-	-	-	--
MW0149808	Gln Ser Tyr Phe Val	-	-	643.312	642.301	[M+H]+	C31H42N6O9	115060	177550	152110	162130	161800	118440	176370	156190	9	9	9	9	154720	109600	115980	70789	54876	54619	58126	42766	-	-	-	-	-	-	--
MW0149833	Gln Trp Trp	-	-	519.23	518.228	[M+H]+	C27H30N6O5	22100000	26599000	21838000	24577000	24446000	17828000	27192000	20730000	686450	428320	543770	717160	19746000	24029000	29804000	15873000	10029000	8292800	12268000	11238000	-	-	-	-	-	-	--
MW0149875	Gln-Gln	-	-	292.168	274.128	[M+NH4]+	C10H18N4O5	4194800	3626500	4057900	3889300	4149200	3728000	5040200	4493700	74007	86234	100790	88521	2109800	2911600	2645300	2287700	1502300	1558200	1790300	2054500	-	HMDB0028795	7010588	54419-93-1	73846	-	--
MW0149894	Glu Ala Asn Lys Glu	-	-	590.278	589.271	[M+H]+	C23H39N7O11	9	9	9	9	9	9	9	9	9	9	9	9	562280	1198300	866170	727520	126510	117900	104500	150420	-	-	-	-	-	-	--
MW0149912	Glu Arg Asp	-	-	419.19	418.181	[M+H]+	C15H26N6O8	3302700	3380600	2696100	3409400	2657200	2656900	3245000	3366800	190070	149450	224450	240470	4339200	5439600	5745900	4370900	1842900	1790100	1756900	1997200	-	-	-	-	-	-	--
MW0149918	Glu Arg Leu	-	-	434.27	416.238	[M+NH4]+	C17H32N6O6	1833700	1486000	1801700	2046500	1263200	1586000	1494700	1375900	862450	590280	501990	802320	547110	1050500	464270	480100	557440	615010	625400	734670	-	-	-	-	-	-	--
MW0149927	Glu Asn Gln Glu	-	-	519.201	518.197	[M+H]+	C19H30N6O11	22786000	20443000	20977000	23977000	16880000	20503000	20579000	16899000	11026000	11804000	10733000	14408000	10125000	15555000	9362900	9724400	10111000	10908000	11137000	9799900	-	-	-	-	-	-	--
MW0149939	Glu Asn Val Glu	-	-	488.197	489.207	[M-H]-	C19H31N5O10	121340	121960	113600	9	113100	96709	136050	137340	11937	15749	7186	10793	44976	95483	29120	12819	39326	48212	39901	55861	-	-	-	-	-	-	--
MW0149978	Glu Gln Lys Asp Arg	-	-	675.337	674.335	[M+H]+	C26H46N10O11	176130	219470	165470	242350	234330	129950	204530	233970	9	9	9	9	67501	82249	87979	46367	61607	53468	75777	98724	-	-	-	-	-	-	--
MW0149981	Glu Gln Phe Arg	-	-	577.276	578.281	[M-H]-	C25H38N8O8	19158000	11887000	13589000	18941000	3496700	3597500	4228000	5089800	74526	36078	41348	53969	180070	190820	110660	150030	4135800	3330400	2578000	2681500	-	-	-	-	-	-	--
MW0149996	Glu Glu Met Ile Ala	-	-	592.263	591.257	[M+H]+	C24H41N5O10S	16136000	14545000	13126000	12190000	6090800	10060000	7253200	7549900	9879300	7884000	8950600	11310000	3232100	3860000	3610800	3023800	12345000	15676000	13376000	11555000	-	-	-	-	-	-	--
MW0150018	Glu Gly Val Tyr Ala	-	-	555.275	537.243	[M+NH4]+	C24H35N5O9	9	9	9	9	9	9	9	9	1038400	893910	1086900	806060	9	9	9	9	491080	573330	575080	560420	-	-	-	-	-	-	--
MW0150031	Glu Ile Ala His Gly	-	-	526.261	525.255	[M+H]+	C22H35N7O8	14991000	19226000	20660000	21693000	19323000	12686000	23274000	23236000	9	9	9	9	1671000	3015800	2364900	1909100	6784400	6751400	7451200	7358600	-	-	-	-	-	-	--
MW0150036	Glu Ile Glu	-	-	390.189	389.18	[M+H]+	C16H27N3O8	9	9	9	9	9	9	9	9	647070	399750	517490	492960	10549000	11977000	12158000	8956200	1834500	1129400	1607500	1998800	-	-	-	-	-	-	--
MW0150052	Glu Leu Gly Lys Gln	-	-	574.322	573.312	[M+H]+	C24H43N7O9	1867700	2164900	1692500	2174000	2527100	1827900	2601200	2433300	65465	46295	50423	59335	666120	901000	765220	531460	743210	897510	962300	866210	-	-	-	-	-	-	--
MW0150078	Glu Lys Leu Thr His	-	-	627.35	626.339	[M+H]+	C27H46N8O9	2060700	2750400	2008400	2941900	4115900	2634800	3570400	3142000	44960	56162	52261	71177	5921200	14770000	9341400	8182400	2124000	2126500	2410100	2476200	-	-	-	-	-	-	--
MW0150085	Glu Lys Tyr Ser Asn	-	-	640.293	639.286	[M+H]+	C27H41N7O11	9	9	9	9	9	9	9	9	3769300	3027200	3663500	4276800	9	21624	9	9	1998900	2000200	2103000	2437600	-	-	-	-	-	-	--
MW0150091	Glu Met Leu Val Ala	-	-	562.29	561.283	[M+H]+	C24H43N5O8S	24701000	29106000	21702000	29657000	26991000	23916000	36906000	33263000	576280	390700	473540	652460	10289000	8645500	10381000	6579500	9297400	11076000	11485000	11014000	-	-	-	-	-	-	--
MW0150104	Glu Phe Leu Lys	-	-	553.333	535.301	[M+NH4]+	C26H41N5O7	12413000	10671000	12071000	10108000	6273100	7934100	4260800	7553800	22468	38793	19837	37503	1044800	1771200	1488400	1430000	2798700	2843000	3074000	3557000	-	-	-	-	-	-	--
MW0150149	Glu Ser Thr Lys	-	-	464.238	463.228	[M+H]+	C18H33N5O9	1736700	1573200	1410800	2058800	1460100	1378400	1599700	1854200	9	9	9	9	79205	111740	88547	80386	602490	682460	633240	594730	-	-	-	-	-	-	--
MW0150167	Glu Thr Phe Arg	-	-	552.277	551.27	[M+H]+	C24H37N7O8	6494600	6153300	6018900	7073200	6507800	5044000	6666100	5940500	98224	79911	92017	88651	772160	349310	661190	286220	2141400	2483600	2632400	2420500	-	-	-	-	-	-	--
MW0150171	Glu Thr Tyr Glu	-	-	539.196	540.207	[M-H]-	C23H32N4O11	142250	154000	120870	155090	138660	107400	152730	153140	9	9	9	9	56048	77535	79241	68019	41403	44719	42677	49965	-	-	-	-	-	-	--
MW0150182	Glu Tyr Ala Asp	-	-	495.179	496.181	[M-H]-	C21H28N4O10	391010	431980	360060	410750	523490	440660	486920	490880	20146	14629	16394	19878	73376	102510	141310	90950	172980	172230	215780	209470	-	-	-	-	-	-	--
MW0150185	Glu Tyr Asn Lys	-	-	553.262	552.254	[M+H]+	C24H36N6O9	9	9	9	4077.8	9	9	9	9	717630	512640	446130	686950	9	9	9	9	108670	245210	253240	261840	-	-	-	-	-	-	--
MW0150193	Glu Tyr Ile Glu	-	-	553.256	552.243	[M+H]+	C25H36N4O10	153440	156210	192640	187630	128060	139080	160620	129010	113820	164870	155320	139650	142930	219320	141310	122270	138420	141090	128100	123970	-	-	-	-	-	-	--
MW0150207	Glu Val Gln Glu	-	-	502.213	503.223	[M-H]-	C20H33N5O10	549120	589590	570470	653590	615810	537440	635820	774410	86831	60351	67908	67309	397820	483490	452910	364980	245840	239380	309690	326000	-	-	-	-	-	-	--
MW0150263	Glu-Ile	-	-	243.133	260.137	[M+H-H2O]+	C11H20N2O5	1502900	1596000	1441400	1475600	1878500	1138900	1693900	1933300	63888	40202	66127	85147	1645800	1532600	1699900	1197000	527770	830360	807560	637240	-	HMDB0028822	9813855	-	-	-	--
MW0150284	Gly Ala Asn Val Arg	-	-	516.29	515.282	[M+H]+	C20H37N9O7	1105800	1467000	1080000	1284500	2066500	1210900	2704800	2214400	11230	34201	39109	32928	2034500	3320300	2920000	2223300	1016200	854990	925460	987560	-	-	-	-	-	-	--
MW0150294	Gly Arg Ala	-	-	303.177	302.17	[M+H]+	C11H22N6O4	9	9	9	9	9	9	9	9	131030	182040	178570	139870	730350	502630	543560	527080	341340	380520	408050	486490	-	-	-	-	-	-	--
MW0150319	Gly Asp Ala Asn Thr	-	-	477.193	476.187	[M+H]+	C17H28N6O10	1703600	1833800	2041000	1998600	2108600	1666400	2237100	1941900	1071400	864770	924340	1293500	3604800	4628200	4133300	3244000	1738500	1552700	1574300	1713600	-	-	-	-	-	-	--
MW0150362	Gly Glu Tyr Ser Val	-	-	571.271	553.238	[M+NH4]+	C24H35N5O10	6367000	6404100	4796700	6199600	7136100	4900700	6956700	6766600	268780	192770	321470	246690	6694600	7623800	7306600	4623600	3346800	3124500	2795800	3416300	-	-	-	-	-	-	--
MW0150365	Gly Gly Asn Glu Glu	-	-	549.154	504.182	[M-H+2Na]+	C18H28N6O11	5492400	6254300	5683300	5878500	5316200	5489200	5850500	6850700	480690	767700	355770	718010	1993100	3632900	1851000	2271600	1262800	2035600	1482200	2544200	-	-	-	-	-	-	--
MW0150366	Gly Gly Gln	-	-	521.239	260.112	[2M+H]+	C9H16N4O5	5401900	4297500	4865000	5758700	4579800	4185500	4902000	5323700	7023.5	7746	10142	14382	3282700	3426300	2697200	2308000	1229300	875110	1019700	1206400	-	-	-	-	-	-	--
MW0150369	Gly Gly Thr	-	-	216.096	233.101	[M+H-H2O]+	C8H15N3O5	9	9	9	9	9	9	9	9	4656400	6201600	7925200	4860300	295520	349160	287990	660700	6958900	8061100	8539700	7947300	-	-	-	-	-	-	--
MW0150397	Gly Leu Arg Asn Gln	-	-	587.318	586.319	[M+H]+	C23H42N10O8	6021400	6508200	5864400	7428000	6928300	4560400	7191600	6503800	140880	133720	152550	138450	2153400	2032200	2278100	1500600	2114700	1855500	2348500	2559900	-	-	-	-	-	-	--
MW0150398	Gly Leu Arg Val Phe	-	-	608.385	590.354	[M+NH4]+	C28H46N8O6	323750	403490	383980	343420	353980	288860	452380	412920	291540	574250	401340	374130	364840	271030	278340	251010	187050	166430	193110	349970	-	-	-	-	-	-	--
MW0150401	Gly Leu Asp Val Trp	-	-	589.301	588.291	[M+H]+	C28H40N6O8	1376000	1444500	1326600	1509200	1438600	1362600	1395300	1688900	1339100	1348400	1260000	1520600	1485400	1575500	1562400	1598700	1515800	1522400	1552900	1406100	-	-	-	-	-	-	--
MW0150404	Gly Leu Glu	-	-	318.165	317.159	[M+H]+	C13H23N3O6	2225000	2251800	2500500	2330500	2686300	2223800	3232500	2889700	6219200	3280600	5601900	3546600	318300	9	9	9	3326800	2600300	3152600	2733700	-	-	-	-	-	-	--
MW0150425	Gly Lys Phe	-	-	397.207	350.195	[M+HCOO+2H]+	C17H26N4O4	4940500	4815600	3864000	6188600	4800600	4126700	5453100	5216400	267900	276510	323680	308680	6247000	7850500	6655200	6005200	2487200	2656300	2390600	2812400	-	-	-	-	-	-	--
MW0150460	Gly Pro Arg	-	-	329.194	328.186	[M+H]+	C13H24N6O4	9	9	9	9	9	9	9	9	2048700	1961100	2104100	3009500	9	9	9	9	759150	1001200	935240	983950	-	-	170776	47295-77-2	-	-	--
MW0150465	Gly Pro Gly	-	-	230.111	229.106	[M+H]+	C9H15N3O4	9	9	9	9	9	9	9	9	581570	632220	697090	582960	2771300	2960200	2463400	3779900	1169000	1200300	1065900	1169300	-	-	-	-	-	-	--
MW0150475	Gly Pro Val	-	-	272.16	271.153	[M+H]+	C12H21N3O4	33510000	34998000	36519000	31724000	33800000	27395000	39512000	41060000	96712	173720	187930	290320	526140	856740	1054200	871400	9340000	10949000	10528000	10318000	-	-	-	-	-	-	--
MW0150534	Gly Val Leu	-	-	288.191	287.185	[M+H]+	C13H25N3O4	9	9	9	9	9	9	9	9	385640	337200	418820	410740	1365100	1071200	1032500	831700	434620	426870	417330	358200	-	-	-	-	-	-	--
MW0150736	Helveticoside;Strophanthidin 3-O-beta-D-digitoxoside	-	-	533.279	534.283	[M-H]-	C29H42O9	9	9	9	9	9	9	9	9	190080	111780	119760	112460	9	9	9	9	195730	179000	191630	197320	C08869	-	441860	630-64-8	-	-	--
MW0150743	Hemibrevetoxin B	-	-	489.282	490.293	[M-H]-	C28H42O7	72801	66891	70639	81493	79897	64056	92391	103750	1177600	660360	830120	802920	9	9	9	9	525770	529390	572280	628370	C20016	-	6442821	122271-91-4	-	-	--
MW0150808	His Ala Arg Glu	-	-	512.257	511.25	[M+H]+	C20H33N9O7	982250	1082100	861820	1116900	1192900	810320	1181600	1075400	64701	38742	67215	51297	180940	22696	84857	20790	399130	364410	387930	458800	-	-	-	-	-	-	--
MW0150812	His Ala Gln Lys	-	-	524.296	482.26	[M+CH3CN+H]+	C20H34N8O6	1098600	1000700	950530	1168800	3764200	2692400	4016400	3736500	224120	191250	221710	199670	353790	388230	379030	284500	1088000	1008900	1081400	1025100	-	-	-	-	-	-	--
MW0150831	His Ala Val Asp	-	-	441.202	440.202	[M+H]+	C18H28N6O7	9	9	9	9	9	9	9	9	1232200	985900	1690700	1583900	9	9	9	9	599080	568870	549280	548950	-	-	-	-	-	-	--
MW0150837	His Arg Phe	-	-	459.252	458.239	[M+H]+	C21H30N8O4	1536300	1276600	1910300	2624300	4153600	4052000	4903200	5712600	9	9	9	9	615110	989550	742950	681620	1151900	1278500	999210	1445700	-	-	-	-	-	-	--
MW0150854	His Asn Ile Asp	-	-	496.22	497.223	[M-H]-	C20H31N7O8	318650	266970	237620	337140	379360	393990	455600	450150	16398	9868.6	11872	15342	15570	32034	23468	23083	174740	186300	215560	206220	-	-	-	-	-	-	--
MW0150860	His Asn Phe Lys	-	-	545.287	544.276	[M+H]+	C25H36N8O6	3362800	3555600	3192700	3240100	3528700	2626100	4049200	4105100	235320	175290	247400	187000	1331600	2516500	2607900	1601600	1493800	1516400	1750300	1788000	-	-	-	-	-	-	--
MW0150862	His Asn Thr	-	-	371.161	370.16	[M+H]+	C14H22N6O6	9	9	9	9	9	9	9	9	22695	34263	31948	47509	80294	88349	52013	61694	52173	39482	60105	52206	-	-	-	-	-	-	--
MW0150880	His Asp Tyr Lys	-	-	560.255	561.255	[M-H]-	C25H35N7O8	1045200	1124300	970560	1227800	1164700	958910	1265400	1394600	69940	61125	51766	65397	1024100	1454800	1141900	957110	532570	431890	599600	602300	-	-	-	-	-	-	--
MW0150909	His Gln Val	-	-	383.205	382.196	[M+H]+	C16H26N6O5	3290700	3006400	2804800	2730100	3000900	3254600	3145400	3485300	3343100	3324200	3067700	3392900	3294600	3625100	3284900	3415100	3170300	2905600	3028200	3020300	-	-	-	-	-	-	--
MW0150925	His Glu Phe Glu	-	-	559.21	560.223	[M-H]-	C25H32N6O9	9	9	9	9	9	9	9	9	50892	51565	77006	67831	9	9	9	9	42644	41435	37988	40625	-	-	-	-	-	-	--
MW0150961	His His Ser Lys His	-	-	645.327	644.314	[M+H]+	C27H40N12O7	10509000	12490000	10628000	11388000	10339000	8333500	13127000	13447000	248570	159330	221490	226470	4028300	3688900	4326000	2616100	3600300	3068700	3548500	4074500	-	-	-	-	-	-	--
MW0150996	His Leu Met	-	-	417.229	399.194	[M+NH4]+	C17H29N5O4S1	1133400	1234300	994640	732920	957320	957090	1217700	1358800	46831	25514	26298	74825	187200	66802	144610	42763	362330	401760	383020	406360	-	-	-	-	-	-	--
MW0151013	His Lys Ile Asp	-	-	512.284	511.275	[M+H]+	C22H37N7O7	1342700	1457600	1272600	1522700	1904800	1285900	2059800	1940000	79600	68706	87305	86581	1219900	1074700	1287500	702310	698620	751820	821310	785020	-	-	-	-	-	-	--
MW0151036	His Phe Arg Asp	-	-	572.268	573.266	[M-H]-	C25H35N9O7	137060	135820	132900	154190	119220	107750	130990	180970	9	9	9	9	16530	40200	40266	20117	48065	51532	62861	55875	-	-	-	-	-	-	--
MW0151063	His Pro Ile	-	-	366.214	365.206	[M+H]+	C17H27N5O4	606470	910590	757580	663850	3074700	1184000	5727600	3529600	849250	929350	905730	866840	564180	1129500	928430	768080	909490	847970	1462800	1355800	-	-	-	-	-	-	--
MW0151098	His Thr Lys Lys	-	-	511.299	512.307	[M-H]-	C22H40N8O6	9	9	9	9	9	9	9	9	84217	38608	56401	50692	9	9	9	9	83915	85079	87856	98427	-	-	-	-	-	-	--
MW0151131	His Tyr Ile Asp	-	-	547.249	546.244	[M+H]+	C25H34N6O8	614150	818600	690890	931710	662540	580540	694480	646570	43456	63714	59111	71594	642430	860800	858640	692780	516750	438760	492080	570040	-	-	-	-	-	-	--
MW0151140	His Val Arg Asp	-	-	524.251	525.266	[M-H]-	C21H35N9O7	5501900	4276900	4104100	5686800	4922600	4585000	4963800	6434200	9	9	9	9	311870	568880	483620	384170	1672700	1578100	1737500	1905700	-	-	-	-	-	-	--
MW0151168	His-Nap-OH	-	-	475.157	474.154	[M+H]+	C25H22N4O6	263250	219550	183110	234720	206330	208080	216650	207600	220220	207330	273740	232750	266320	287540	305220	269510	238920	253950	253290	159520	-	-	-	-	-	-	--
MW0151198	Homocapsaicin;Homocapsaicin I	-	-	318.207	319.215	[M-H]-	C19H29NO3	6128100	3867300	6173500	6725000	14611000	9839700	14000000	15716000	102240	47701	52260	46128	1218200	1673000	1651900	947610	3450700	3071500	3153500	3435100	C20215	HMDB0036329	71448975	58493-48-4	-	-	--
MW0151323	Ile Arg Asn Asp	-	-	515.257	516.266	[M-H]-	C20H36N8O8	110210	110020	118760	108940	128570	131210	151370	156610	119140	124280	119730	111760	118410	109970	112240	107510	116240	106870	94583	96235	-	-	-	-	-	-	--
MW0151364	Ile Asp Glu	-	-	417.199	375.164	[M+CH3CN+H]+	C15H25N3O8	9	9	9	9	9	9	9	9	1788900	1757600	1850700	2430900	9	9	9	9	806160	693830	789460	905840	-	-	-	-	-	-	--
MW0151391	Ile Gln Asn Glu	-	-	501.23	502.239	[M-H]-	C20H34N6O9	279760	306710	263740	314830	312100	255030	332810	425340	9	9	9	9	17868	24110	15439	11634	73596	66077	103630	106500	-	-	-	-	-	-	--
MW0151414	Ile Glu Glu	-	-	390.189	389.18	[M+H]+	C16H27N3O8	1622100	2159800	1582500	1900700	2579200	1914700	3282400	2828700	9	9	9	9	1559500	2957500	3139000	2381500	1214200	928200	923230	1074900	-	-	-	-	-	-	--
MW0151417	Ile Glu His Lys	-	-	524.283	525.291	[M-H]-	C23H39N7O7	160970	183200	158600	209090	152780	149030	170670	184250	9	9	9	9	83792	111850	102600	59220	74275	67535	69306	84721	-	-	-	-	-	-	--
MW0151442	Ile Gly Val	-	-	288.191	287.185	[M+H]+	C13H25N3O4	5338800	13533000	6907300	9760700	25669000	13312000	45751000	28748000	9	9	9	9	44054	173980	164680	165140	4850200	4857600	6016200	6384100	-	-	-	-	-	-	--
MW0151447	Ile His Asn Glu	-	-	510.235	511.239	[M-H]-	C21H33N7O8	656960	624980	565360	582800	728760	741580	681940	730760	135500	93080	79445	103580	287800	378390	350790	321510	580070	572480	611670	676200	-	-	-	-	-	-	--
MW0151482	Ile Leu Ala Asp	-	-	431.249	430.243	[M+H]+	C19H34N4O7	9	9	9	9	9	9	9	9	1637600	1280900	1530100	1287000	9	9	9	9	457890	438630	495180	449270	-	-	-	-	-	-	--
MW0151540	Ile Phe Gln Glu	-	-	534.256	535.264	[M-H]-	C25H37N5O8	195890	195030	195780	200470	238360	195380	208610	234460	11942	7094.2	11488	12629	223630	266290	262940	190230	123260	96872	115920	126420	-	-	-	-	-	-	--
MW0151553	Ile Phe Val Lys	-	-	506.332	505.326	[M+H]+	C26H43N5O5	484670	717360	524520	685850	1032100	508400	1570000	1114700	52898	56962	50824	69725	775140	887290	901780	720960	320800	368360	302710	425730	-	-	-	-	-	-	--
MW0151597	Ile Thr His Asp	-	-	483.222	484.228	[M-H]-	C20H32N6O8	11515000	7837200	8171800	11723000	8481600	8850200	11393000	11605000	91703	41242	43474	60907	308070	334060	242240	284540	3664000	2551100	2607400	2575400	-	-	-	-	-	-	--
MW0151607	Ile Thr Tyr Asp	-	-	509.224	510.233	[M-H]-	C23H34N4O9	509500	479130	399620	599490	1132400	891860	1257500	1413200	481950	219620	207150	342830	52374	63964	52784	41486	782240	801050	866420	978270	-	-	-	-	-	-	--
MW0151650	Ile Val Leu Glu	-	-	473.299	472.29	[M+H]+	C22H40N4O7	2198800	2581700	2499400	3117300	2630200	3514000	3159300	2906200	3058700	2659400	3153200	3351100	3768400	3270000	3402600	3193800	3025800	2507800	3009300	3370700	-	-	-	-	-	-	--
MW0151672	Ile-HoPhe-OH	-	-	399.153	400.163	[M-H]-	C21H24N2O6	9	9	9	9	9	9	9	9	46769	47779	41629	47108	596590	673030	720290	452670	106350	103690	115310	99106	-	-	-	-	-	-	--
MW0151724	Indole-3-acetaldehyde oxime;Indole-3-acetaldoxime;3-Indoleacetaldoxime;(E)-Indol-3-ylacetaldoxime	-	-	214.106	174.079	[M-H+CH3CN]-	C10H10N2O	160620	117590	150190	178470	247750	218260	243500	311610	6187.7	5115.4	4082	4667.8	22069	26362	22624	15988	73837	67721	76742	79834	C02937	-	5371769	-	-	-	ko00380,ko01100,ko01210
MW0151783	Isoandrocymbine	-	-	411.191	371.173	[M-H+CH3CN]-	C21H25NO5	9	9	9	9	9	9	9	9	24948	25363	14174	12019	9	9	9	9	30128	31317	37124	34672	C16708	-	46173814	-	-	-	--
MW0151926	Juvenile hormone II acid;(2E,6E)-(10R,11S)-10,11-Epoxy-3,7,11-trimethyltrideca-2,6-dienoic acid;(2E,6E)-(10R,11S)-10,11-Epoxy-3,7,11-trimethyltrideca-2,6-dienoate;(2E,6E)-10,11-Epoxy-3,7,11-trimethyltridecadienoic acid	-	-	289.178	266.188	[M+Na]+	C16H26O3	9254700	9574500	8816300	9770200	6440600	7392100	6946800	7583800	94492	76174	55622	48628	84792	107210	79959	71550	4288800	4533800	4545700	3930400	C04834	-	5459797	-	-	-	--
MW0151927	Juvenile hormone II;Methyl(2E,6E)-(10R,11S)-10,11-epoxy-3,7,11-trimethyltrideca-2,6-dienoate	-	-	279.196	280.204	[M-H]-	C17H28O3	234710	208290	244250	249910	188520	136120	184810	162530	11897	10044	9	9	108560	179750	54758	118190	130640	113950	117620	123090	C04867	-	5459796	-	-	-	--
MW0151945	JWH 018 N-pentanoic acid metabolite	-	-	408.103	371.152	[M+K-2H]-	C24H21NO3	9	9	9	9	9	9	407.54	9	110750	116620	110700	107210	387590	471240	456630	319970	76497	97998	97909	98287	-	-	53394451	-	-	-	--
MW0151966	JWH 210 N-(5-carboxypentyl) metabolite	-	-	398.174	399.183	[M-H]-	C26H25NO3	24893	38639	37246	14980	32563	44193	42425	38651	8292.9	15577	28644	24213	4292.4	27542	25252	15609	14601	60740	40103	47506	-	-	-	-	-	-	--
MW0151974	JWH022	-	-	340.166	339.162	[M+H]+	C24H21NO	5261600	4278500	4400600	5385100	6098100	5538000	5871200	7200600	49445	35217	45464	39475	43367	53095	41296	40519	1688700	1627100	1795500	2005100	-	-	91936930	209414-16-4	-	-	--
MW0151990	Kalkitoxin thioamide alcohol	-	-	385.293	384.281	[M+H]+	C21H40N2O2S	2185600	2510700	2483500	2499300	2491500	2150300	2633700	2005400	2676000	2349500	2633800	2472100	2556100	2244700	2600100	2488600	2618900	2245600	2216700	2166500	-	-	-	-	-	-	--
MW0152026	Kikkanol A	-	-	270.207	254.188	[M+NH4-2H]-	C15H26O3	133780	138130	154980	138550	156970	146340	155470	147730	166120	195520	148850	149990	161280	154740	151460	159350	150220	136360	175060	159060	C17603	-	10706137	-	-	-	--
MW0152097	L-a-Lysophosphatidylserine	-	-	546.28	525.307	[M+Na-2H]-	C24H48NO9P	8413000	8620000	9314100	9605000	9040600	8401000	8219700	8347900	8763700	7827000	7765600	8656300	3037700	4030800	3300100	2535600	7274000	9519300	5793900	11830000	-	-	-	-	-	-	--
MW0152160	L-beta-Phenylalanine;(R)-3-Amino-3-phenylpropanoate	-	-	164.05	165.079	[M-H]-	C9H11NO2	9048300	8919200	8742200	9834000	8919700	8446300	9117900	9722900	3713700	3486800	3412600	3306700	6051100	8375100	5983500	7101100	5297600	4591200	5491300	5378000	C20487	-	686703	-	-	-	--
MW0152192	Leu Ala Arg Glu	-	-	488.275	487.275	[M+H]+	C20H37N7O7	1144400	1131700	1087900	1200700	481130	472370	503160	538590	475340	334040	326470	493780	140990	166400	132720	108890	911700	1082900	945740	1169200	-	-	-	-	-	-	--
MW0152197	Leu Ala Glu	-	-	314.172	331.174	[M+H-H2O]+	C14H25N3O6	553890	654590	589880	783330	800360	580170	844440	735690	60334	46376	63283	52489	725340	885650	756010	537820	252910	311700	289520	345230	-	-	-	-	-	-	--
MW0152198	Leu Ala Gly Glu Phe	-	-	536.264	535.264	[M+H]+	C25H37N5O8	9	9	9	9	9	9	9	9	2667100	2203800	2335400	2388000	9	9	9	9	2564600	2855000	3401600	3767100	-	-	-	-	-	-	--
MW0152224	Leu Arg Gly Gln Asp	-	-	588.305	587.303	[M+H]+	C23H41N9O9	1009500	1051200	925200	1113500	1097300	791780	1206900	1214200	31237	23564	24260	25148	572750	757220	664650	531420	403010	467240	377520	489920	-	-	-	-	-	-	--
MW0152295	Leu Gln Lys Ser Leu	-	-	588.372	587.364	[M+H]+	C26H49N7O8	442270	448680	453200	508240	478250	371020	535030	553800	9	9	9	9	62418	40794	68789	47615	164300	148600	126010	162820	-	-	-	-	-	-	--
MW0152322	Leu Glu Ile Glu	-	-	501.259	502.264	[M-H]-	C22H38N4O9	247010	257270	228050	284090	275150	208070	367090	342700	10440	6518.8	8211.3	11713	203310	368100	327120	232530	110480	101080	126190	127350	-	-	-	-	-	-	--
MW0152324	Leu Glu Lys Glu	-	-	518.289	517.275	[M+H]+	C22H39N5O9	1020500	975250	857840	1131400	1324100	1143700	1458100	1614600	63549	47404	59525	82238	27168	50424	38400	40889	372720	519440	414450	489470	-	-	-	-	-	-	--
MW0152326	Leu Glu Phe Glu	-	-	535.236	536.248	[M-H]-	C25H36N4O9	618770	472770	435400	611800	5247000	5489900	6597800	7195800	252430	180310	133360	235460	645040	681410	633600	485660	4852600	4297800	4944300	5400000	-	-	-	-	-	-	--
MW0152344	Leu Gly His Phe Met	-	-	604.296	603.284	[M+H]+	C28H41N7O6S	57230000	56572000	60247000	60056000	65590000	47356000	67470000	66999000	1901100	1554300	2118700	2121900	17591000	10242000	17582000	9677400	21676000	19915000	21317000	25349000	-	-	-	-	-	-	--
MW0152350	Leu Gly Val	-	-	288.19	287.185	[M+H]+	C13H25N3O4	424330	101960	223110	266910	19450	59989	156990	23804	19302	26593	16855	25893	18274	21578	23402	19677	73425	76703	57911	79731	-	-	-	-	-	-	--
MW0152362	Leu His Phe	-	-	416.226	415.222	[M+H]+	C21H29N5O4	8100.4	9	9	9	10035	9350.7	9	9	9467200	8450300	17518000	12493000	9	9	9	9	7944700	3071100	3981700	5013300	-	-	-	-	-	-	--
MW0152374	Leu Ile Glu	-	-	356.217	373.221	[M+H-H2O]+	C17H31N3O6	546870	553620	509270	626680	593740	413260	637730	678570	11079	14875	12388	24421	367920	436170	314030	266390	201690	186320	217410	236340	-	-	-	-	-	-	--
MW0152375	Leu Ile Glu Glu	-	-	501.254	502.264	[M-H]-	C22H38N4O9	9	9	9	9	9	9	9	9	40301	31422	32976	34241	9	9	9	9	30342	30801	48794	32540	-	-	-	-	-	-	--
MW0152386	Leu Ile Tyr	-	-	430.229	407.242	[M+Na]+	C21H33N3O5	2592700	3371600	2360500	3027100	6372900	3673900	8412600	7535700	53186	43635	55119	50209	290650	737340	352370	485690	1185500	1399600	1596200	1582500	-	-	-	-	-	-	--
MW0152405	Leu Leu Ser Pro Tyr	-	-	592.331	591.327	[M+H]+	C29H45N5O8	2319500	2759000	1817500	2029700	3704700	2200200	4229200	3691700	47809	46011	40931	44800	85017	64235	165450	72360	846870	802900	823150	940930	-	-	-	-	-	-	--
MW0152466	Leu Pro Gln	-	-	713.416	356.206	[2M+H]+	C16H28N4O5	67254	51192	26501	51176	79782	37869	78976	59992	7964.5	11944	9139.5	13445	338910	384110	366390	258030	60363	74871	89563	87102	-	-	-	-	-	-	--
MW0152473	Leu Pro Thr	-	-	330.202	329.195	[M+H]+	C15H27N3O5	3516400	4286500	3410600	3866900	5206000	3346900	5799500	5782000	93708	90929	116320	143570	4792100	5436500	4783900	3159600	2056200	1786700	1942500	1971100	-	-	-	-	-	-	--
MW0152484	Leu Ser Gln Pro Lys	-	-	572.343	571.333	[M+H]+	C25H45N7O8	221620	126000	175920	218960	9	9	9	9	81683	108340	90567	83539	34446000	53596000	59762000	49743000	6389200	6782900	6882600	7277300	-	-	-	-	-	-	--
MW0152494	Leu Ser Leu Pro Glu	-	-	558.309	557.306	[M+H]+	C25H43N5O9	204220	223770	180820	214730	191330	162150	235500	232500	9	9	9	9	546480	732410	616960	472010	161000	152680	153070	161010	-	-	-	-	-	-	--
MW0152497	Leu Ser Phe Gln Asp	-	-	626.312	608.281	[M+NH4]+	C27H40N6O10	9	9	9	9	9	9	9	9	2959400	2821500	3159900	3584600	9	9	9	9	1656500	1776000	1565800	1683900	-	-	-	-	-	-	--
MW0152500	Leu Ser Ser	-	-	628.352	305.159	[2M+NH4]+	C12H23N3O6	1079200	1073500	923500	1192000	1242200	838770	1261700	1261700	28130	21132	28797	18538	316360	245330	337420	163340	307720	352750	334420	388630	-	-	-	-	-	-	--
MW0152537	Leu Tyr Asp Lys	-	-	555.312	537.28	[M+NH4]+	C25H39N5O8	9	9	9	9	9	9	9	9	350070	406620	538680	536320	9	9	9	9	330400	478910	545110	485250	-	-	-	-	-	-	--
MW0152554	Leu Tyr Val Lys	-	-	522.325	521.321	[M+H]+	C26H43N5O6	38668	30189	34264	52417	202180	145190	253350	264270	133730	150400	113110	111270	1132700	1694700	1242500	1190100	2986000	3261500	3217700	3134800	-	-	-	-	-	-	--
MW0152573	Leu Val Val Val Asp	-	-	544.341	543.327	[M+H]+	C25H45N5O8	1823500	1178300	1120400	2109700	4142000	3345800	4995300	4212000	54549	31444	19780	23415	31683	46531	48020	23127	1335100	1545300	1474400	1270500	-	-	-	-	-	-	--
MW0152600	Leu-Gln	-	-	242.149	259.153	[M+H-H2O]+	C11H21N3O4	4293100	5758800	4603700	6163200	6244500	3558400	6400900	6119300	183510	199990	231030	220570	4774600	7492100	6728800	5154900	2111400	2670800	2944300	2415900	-	HMDB0028927	-	-	-	-	--
MW0152601	Leu-Glu	-	-	259.129	260.137	[M-H]-	C11H20N2O5	2699600	3044200	2509500	3578600	5019000	3400500	5148200	5347500	45213	33850	35561	29941	128790	193840	125610	115410	788510	697340	819170	794460	-	-	-	-	-	-	--
MW0152665	L-Histidinol phosphate	-	-	242.035	221.056	[M+Na-2H]-	C6H12N3O4P	17122	17221	16401	12064	21091	47756	49798	21967	790540	641830	623980	777600	12973	29143	21179	17719	389360	406550	349370	279470	C01100	-	439398	25679-93-0	-	-	ko00340,ko01100,ko01230
MW0152737	Lobelanine	-	-	351.211	335.188	[M-H+NH3]-	C22H25NO2	174550	122410	161290	130850	202290	227080	258550	333130	29110	46231	36407	19350	25039	69173	27242	31404	92096	46773	97205	111360	C10157	-	442647	579-21-5	-	-	--
MW0152750	Lolitrem K	-	-	600.341	601.34	[M-H]-	C37H47NO6	2722800	2951700	3009100	2628300	3283100	3813300	3106000	2965100	4602000	5924800	5524700	5112900	6324800	6249800	6532300	6544400	3306900	3087600	3364200	3366000	C20533	-	72734300	-	-	-	--
MW0152870	Lys Arg Leu Glu	-	-	543.322	544.333	[M-H]-	C23H44N8O7	1416100	1368800	1458600	1408300	1403900	1564900	1511100	1579200	1689300	1600100	1726800	1661600	1742000	1795700	1815300	1605400	1237300	1583600	1754600	1689800	-	-	-	-	-	-	--
MW0152892	Lys Asn Thr	-	-	403.232	361.196	[M+CH3CN+H]+	C14H27N5O6	6370700	6252800	4921800	5196100	6004500	5375900	6430600	5395800	5558300	5160800	6529800	6354700	5572100	6881700	6464500	5487500	5816500	6024200	5905600	6206400	-	-	-	-	-	-	--
MW0152904	Lys Asp Leu Glu	-	-	504.264	503.259	[M+H]+	C21H37N5O9	9	9	9	9	9	9	9	9	27295	19220	20092	26802	9	9	9	9	24917	14994	22610	24306	-	-	-	-	-	-	--
MW0152912	Lys Asp Thr Lys	-	-	491.286	490.275	[M+H]+	C20H38N6O8	38485000	72405000	33704000	75307000	119770000	56802000	150140000	108960000	2768900	1757300	3148900	3421300	1444500	1640400	3760700	1309200	29857000	31906000	36832000	36666000	-	-	-	-	-	-	--
MW0152942	Lys Gln Phe Glu	-	-	549.278	550.275	[M-H]-	C25H38N6O8	9	9	9	9	9	9	9	9	94816	42465	64353	65103	9	9	9	9	53959	49619	53326	64272	-	-	-	-	-	-	--
MW0152944	Lys Gln Ser Glu	-	-	491.249	490.239	[M+H]+	C19H34N6O9	15892000	19199000	13461000	25123000	45213000	18580000	47939000	34676000	66241	23118	67225	88041	2012400	9455900	13562000	5952900	9210200	7795400	9222000	9170300	-	-	-	-	-	-	--
MW0152975	Lys Gly Gly Asn Glu	-	-	504.264	503.234	[M+H]+	C19H33N7O9	3150400	4010500	2983000	4051800	4093700	3102100	4990400	4664700	123730	90868	143550	128190	1306900	744060	902540	567430	1127500	998250	824210	929900	-	-	-	-	-	-	--
MW0152990	Lys His Ile Glu Glu	-	-	655.339	654.334	[M+H]+	C28H46N8O10	9	9	9	9	9	9	9	9	714500	424900	535490	553450	9	9	9	9	350260	406730	237810	385890	-	-	-	-	-	-	--
MW0152993	Lys His Met	-	-	846.44	414.205	[2M+NH4]+	C17H30N6O4S1	1566700	945570	1480200	1756400	227400	478640	883180	232550	251250	216220	174900	229140	214200	271180	151470	149790	130390	120870	137330	153870	-	-	-	-	-	-	--
MW0153024	Lys Leu Ala Glu	-	-	460.27	459.269	[M+H]+	C20H37N5O7	888170	592090	1001400	1031700	394140	301140	831420	316220	200730	217790	213930	257160	325450	340350	245300	288010	350050	390830	345170	569830	-	-	-	-	-	-	--
MW0153028	Lys Leu Asn His Gln	-	-	656.384	638.35	[M+NH4]+	C27H46N10O8	9	9	9	9	9	9	9	9	365250	296160	458440	456640	176860	184730	205520	173030	367160	330360	300570	361710	-	-	-	-	-	-	--
MW0153039	Lys Leu His Glu	-	-	526.297	525.291	[M+H]+	C23H39N7O7	134900	55654	62153	103190	47174	50163	159150	177980	37810	15062	11887	16741	10935	12607	6321.4	7342.6	154360	162710	154380	118510	-	-	-	-	-	-	--
MW0153076	Lys Met His	-	-	846.443	414.205	[2M+NH4]+	C17H30N6O4S1	1493300	927370	1946500	2085500	335470	655100	1175500	458570	687410	494610	340770	434100	458820	454050	347380	344220	201860	170810	176780	241750	-	-	-	-	-	-	--
MW0153094	Lys Phe Glu	-	-	440.251	422.217	[M+NH4]+	C20H30N4O6	7337200	7297000	6932400	8350000	6784600	6220300	7477900	7434000	257330	239430	298800	341180	9008100	13983000	10782000	9543500	4178500	3794200	4133100	4058100	-	-	-	-	-	-	--
MW0153100	Lys Phe Leu Glu	-	-	534.292	535.301	[M-H]-	C26H41N5O7	888820	880800	860510	954080	1090200	815670	1102400	1099600	29888	22690	38213	38931	2838800	3458600	2627100	2424300	703120	763490	808890	754210	-	-	-	-	-	-	--
MW0153107	Lys Phe Thr Asp	-	-	510.257	509.249	[M+H]+	C23H35N5O8	7076800	7145900	6888000	6491200	4361000	5553200	3415200	3797200	5296200	4468800	4725200	5812300	2450700	2702300	2083200	1906200	6565400	7432400	7424400	8076100	-	-	-	-	-	-	--
MW0153125	Lys Ser Asp Glu Met	-	-	609.252	608.248	[M+H]+	C23H40N6O11S	4847000	4626100	4454800	4322700	3678500	2720800	3421100	3729400	296580	186260	214570	290900	1963500	2545700	2068200	2029000	3528700	4128800	3648800	3808900	-	-	-	-	-	-	--
MW0153135	Lys Ser Phe Glu	-	-	527.281	509.249	[M+NH4]+	C23H35N5O8	199540	175130	201400	198520	216620	153650	266500	219950	25871	13499	17630	26733	210230	189400	181110	135460	113860	100050	151740	85255	-	-	-	-	-	-	--
MW0153148	Lys Thr Glu Lys	-	-	505.301	504.291	[M+H]+	C21H40N6O8	12238000	25853000	11851000	25365000	56529000	17592000	81364000	48580000	1522400	1289300	1602500	2178800	1355200	1368400	4476500	1207900	13350000	12723000	13852000	13608000	-	-	-	-	-	-	--
MW0153149	Lys Thr Glu Lys Ala	-	-	576.333	575.328	[M+H]+	C24H45N7O9	2291000	2236900	2880600	2986000	1989800	2080200	1994200	1892500	1515000	2558500	2599500	2414300	2527800	3227800	2088300	2105100	1855900	2361000	2170800	2159600	-	-	-	-	-	-	--
MW0153158	Lys Thr Phe Glu	-	-	524.276	523.264	[M+H]+	C24H37N5O8	1771500	2163600	2018600	208500	7465600	7325100	7506100	9508100	908950	911570	659280	1214700	1521300	1659500	1599900	1214400	8867800	9326800	8847200	6581000	-	-	-	-	-	-	--
MW0153163	Lys Thr Tyr	-	-	821.443	410.217	[2M+H]+	C19H30N4O6	348970	413590	295340	392640	408010	244820	426930	349760	9	9	9	9	432010	494740	493210	391080	138020	161500	179910	178520	-	-	-	-	-	-	--
MW0153186	Lys Tyr Thr Ser Ser	-	-	585.287	584.281	[M+H]+	C25H40N6O10	9	9	9	9	9	9	9	9	2934600	1932000	2442500	2808900	9	9	9	9	953370	1311600	1644400	1569500	-	-	-	-	-	-	--
MW0153191	Lys Tyr Val Met Leu	-	-	653.361	652.362	[M+H]+	C31H52N6O7S	889530	1409700	1335700	956390	1064100	829000	1176000	1769100	48160	42557	51127	53556	646160	454450	676800	374580	523210	546470	662860	758470	-	-	-	-	-	-	--
MW0153215	Lys-Abu-OH	-	-	355.155	339.143	[M+NH4-2H]-	C15H21N3O6	194820	216190	162350	194880	187030	156060	217670	218750	128110	115720	108620	118380	731890	1071000	916360	715300	233370	194340	219330	243430	-	-	-	-	-	-	--
MW0153230	Lys-Lys-OH	-	-	381.174	382.185	[M-H]-	C17H26N4O6	37769	39962	39130	45735	46271	38502	41694	48347	471800	391490	408040	483720	1179800	1583300	1412700	1041500	407510	365790	453020	453480	-	-	-	-	-	-	--
MW0153279	Lys-Thr-OH	-	-	354.13	355.138	[M-H]-	C15H21N3O7	9	9	3929.4	9	9	9	9	9	53924	39880	42537	43351	42903	38596	37112	45161	23593	19299	27373	19309	-	-	-	-	-	-	--
MW0153324	Magnoshinin	-	-	413.194	414.204	[M-H]-	C24H30O6	261780	100770	298880	343420	59439	41529	185790	59406	11620	13027	16442	15760	20558	16368	13954	19527	60740	59765	65883	68714	C10658	-	442896	86702-02-5	-	-	--
MW0153337	Malonamoyl-CoA	-	-	919.08	852.132	[M-2H+3Na]+	C24H39N8O18P3S	1235600	1212000	1015100	1965200	626420	587550	972400	1019800	9	9	9	9	29832	50834	36215	39200	333750	340120	338670	308210	C06625	-	11966156	-	-	-	--
MW0153343	Maltohexaose	-	-	991.334	990.327	[M+H]+	C36H62O31	9	9	9	9	9	9	9	9	100540	80509	183220	97405	21997	24712	20914	56840	173100	83760	120910	130490	C01936	HMDB0012253	439606	34620-77-4	61953	-	--
MW0153389	Mannobiose;beta-1,4-Mannobiose	-	-	377.086	342.116	[M+Cl]-	C12H22O11	48293	38382	47258	62750	69332	50415	69859	83865	401840	384550	634960	507120	404840	525530	362960	352650	418100	437790	506100	507120	C20861	HMDB0029933	152109	14417-51-7	28085	-	--
MW0153477	Mesoporphyrin IX	-	-	565.284	566.289	[M-H]-	C34H38N4O4	96004	80787	62966	80434	155410	191670	234100	241790	9	9	9	9	3892.1	7039.3	4754.9	8718.6	52142	51233	55248	65239	-	HMDB0002379	-	493-90-3	-	6655	--
MW0153515	Met Asp Gly	-	-	322.106	321.099	[M+H]+	C11H19N3O6S1	937550	915490	936820	974810	954650	837520	1013700	948140	776500	730550	771400	707560	861490	1009500	917330	900000	866600	854260	866100	1119900	-	-	-	-	-	-	--
MW0153603	Met Lys Asn His Leu	-	-	642.345	641.332	[M+H]+	C27H47N9O7S	24755000	33751000	21152000	33212000	22926000	16460000	36939000	24924000	470720	515680	557380	672700	12681000	11914000	13677000	7396700	8830400	8595900	8614000	12813000	-	-	-	-	-	-	--
MW0153607	Met Lys His	-	-	415.214	414.205	[M+H]+	C17H30N6O4S1	12199000	5870000	15201000	14903000	3807500	3556500	15986000	4092600	2470600	2452800	2566500	2292300	2275600	2454200	2187400	2513200	5216400	6214900	6167700	6933600	-	-	-	-	-	-	--
MW0153611	Met Lys Phe	-	-	447.205	424.214	[M+Na]+	C20H32N4O4S1	15614000	15492000	18687000	18124000	19939000	12635000	17892000	18556000	217380	229010	243890	296680	10263000	10822000	12098000	11853000	3070100	4607400	5308200	5525900	-	-	-	-	-	-	--
MW0153622	Met Met Phe	-	-	445.193	427.16	[M+NH4]+	C19H29N3O4S2	5618200	4979700	6490400	6400100	7184000	6662500	7767600	5470700	248720	216390	265450	310430	3673800	5620900	4892800	3473600	2581800	2836800	2425200	3265300	-	-	-	-	-	-	--
MW0153648	Met Pro Leu	-	-	360.192	359.188	[M+H]+	C16H29N3O4S1	110060000	106990000	114690000	113900000	68462000	71846000	66438000	68594000	429410	497850	499710	559980	1550400	4342900	7133200	4030500	20974000	27406000	25750000	31159000	-	-	-	-	-	-	--
MW0153665	Met Ser Phe Thr Phe	-	-	632.263	631.268	[M+H]+	C30H41N5O8S	160550	127420	133830	149290	133790	133720	137970	131540	152080	129520	162100	143080	137730	178800	168860	176010	154700	174300	147000	303310	-	-	-	-	-	-	--
MW0153924	Mirasan	-	-	239.129	240.139	[M-H]-	C13H21ClN2	284410	281250	275900	270200	257710	302230	313150	296240	282280	303980	250900	276750	263420	291010	258940	268040	269610	228910	294140	310950	C11716	-	75648	2519-75-7	-	-	--
MW0154074	N(6)-[(Indol-3-yl)acetyl]-L-lysine;N6-[(Indol-3-yl)acetyl]-L-lysine	-	-	286.155	303.158	[M+H-H2O]+	C16H21N3O3	940960	881800	907310	993400	1109300	881520	1139000	1347400	15112	13953	17198	21190	223690	261270	285830	174790	320210	316960	357820	378730	C04211	-	161240	-	-	-	--
MW0154128	N-[1-[4-(5-Chloro-2-oxo-3H-benzimidazol-1-yl)piperidin-1-yl]propan-2-yl]naphthalene-2-carboxamide;hydrochloride	-	-	461.173	462.182	[M-H]-	C26H27ClN4O2	640280	485650	724360	819440	1031300	944750	790660	1142500	9	9	9	9	431050	533870	489040	355030	182460	170150	147910	41814	-	-	76453682	-	-	-	--
MW0154140	N17-Dimethylindole-3-carboxaldehyde	-	-	220.093	173.084	[M+HCOO+2H]+	C11H11NO	1544400	1585600	1763600	1579700	1522800	1666400	1704300	1621700	1683900	1659700	1583500	1269700	1425500	1307800	1390000	1256900	1555900	1513100	1449100	1239100	-	-	-	-	-	-	--
MW0154269	Nap-Ala-OH	-	-	359.104	394.116	[M+H-2H2O]+	C21H18N2O6	15712	26128	26371	34788	41977	22273	18374	12559	1069900	1051500	941910	996050	11907000	12882000	17619000	12714000	4368500	4469800	5305800	6082800	-	-	-	-	-	-	--
MW0154288	Nap-Lys-OH	-	-	452.181	451.174	[M+H]+	C24H25N3O6	212310	263980	231060	250450	312610	242790	277390	346610	9	9	9	9	72521	106030	114930	55047	72125	85096	102360	82449	-	-	-	-	-	-	--
MW0154297	Nap-Tyr-OH	-	-	485.133	486.143	[M-H]-	C27H22N2O7	167700	149450	142540	160010	125170	140170	135490	152170	164750	184510	123430	174980	144530	156360	167560	174780	122780	132300	205140	200860	-	-	-	-	-	-	--
MW0154554	N-methylundec-10-enamide	-	-	244.192	197.178	[M+HCOO+2H]+	C12H23NO	34568	24950	45361	24494	33814	21016	26511	30039	25285	18899	22925	18478	8512.2	11211	9720.8	23926	52403	47472	89164	54923	-	-	-	-	-	-	--
MW0154586	Nomilin	-	-	495.208	514.22	[M-H2O-H]-	C28H34O9	65253	47882	51300	68572	122120	105710	154280	161990	9332.2	6189.3	4491.5	6801.7	9	9	9	9	54088	43813	57728	60641	C08773	HMDB0035772	72320	1063-77-0	-	-	--
MW0154594	Norbelladine	-	-	294.099	259.121	[M+Cl]-	C15H17NO3	9	9	9	9	9	9	9	9	106170	72387	78200	84384	202380	411270	382380	291770	144380	147810	216980	201020	C16701	-	416247	-	-	-	--
MW0154673	Obacunone	-	-	437.192	454.199	[M+H-H2O]+	C26H30O7	808370	507980	955360	1062900	180130	257670	439520	298940	217290	252760	231150	193140	268680	286310	260970	169850	290750	357030	321450	441550	C08775	HMDB0035858	119041	751-03-1	-	-	--
MW0154713	o-Hydroxylaminobenzoate;2-Hydroxylaminobenzoic acid	-	-	189.987	153.043	[M-2H+K]-	C7H7NO3	9	9	9	9	9	9	9	9	12914	25883	23594	27982	72007	35183	63899	47601	20213	20941	27495	23737	C16235	-	349497	-	-	-	--
MW0154728	Oleic Acid-biotin	-	-	521.352	522.36	[M-H]-	C28H50N4O3S	1566000	1595900	1678000	1504500	1894500	2018000	1947600	1898700	2225400	2436900	2245700	2041800	2279900	2489400	2500000	2212800	1748200	1492100	1658400	1879000	-	-	-	-	-	-	--
MW0154739	omega-Hydroxyphylloquinone	-	-	487.321	466.345	[M-2H+Na]-	C31H46O3	9	9	9	9	9	9	9	9	58617	38460	38263	29488	110110	102500	92972	92872	37351	34158	41234	39228	C20806	-	90657851	-	-	-	--
MW0154889	Pantetheine 4'-phosphate;4'-Phosphopantetheine;Phosphopantetheine;D-Pantetheine 4'-phosphate	-	-	357.088	358.096	[M-H]-	C11H23N2O7PS	9	9	9	9	9	9	9	9	614440	578720	495520	586000	6266000	8755400	9849700	5907600	2505400	2443500	3552300	3379300	C01134	HMDB0001416	115254	-	16858	-	ko00770,ko01100
MW0154985	Penitrem F	-	-	616.28	617.291	[M-H]-	C37H44ClNO5	480910	474430	433600	446960	689940	860450	720300	726410	235320	199680	209310	313320	295900	394510	341620	329370	806090	732710	858460	920820	C20598	-	3086086	78213-65-7	-	-	--
MW0155014	Perazine	-	-	338.167	339.177	[M-H]-	C20H25N3S	1587700	1121600	1491900	2081700	1028600	573250	1355500	1157900	7883.5	2984.3	3118.5	2016.1	2919.5	2458.3	3026.8	2153.1	334280	391080	362040	354050	C16903	-	4744	84-97-9	-	-	--
MW0155064	Phaseolic acid	-	-	329.097	296.053	[M-2H+3Na]+	C13H12O8	24101	33131	16462	12405	9	9	9	9	258820	344660	231760	330160	9	9	9	9	343810	366740	327300	342540	C10483	HMDB0029318	5281786	53755-04-7	493262	-	--
MW0155069	Phe Ala Arg Asp	-	-	506.235	507.244	[M-H]-	C22H33N7O7	3108800	3029100	2850300	3539000	3687100	2551100	3929600	4068200	10411	6033	2205.1	9202.4	1117900	1131500	1111700	756120	1119900	927620	1209900	1278900	-	-	-	-	-	-	--
MW0155086	Phe Arg Ala Asp	-	-	508.251	507.244	[M+H]+	C22H33N7O7	35327000	35809000	29836000	41142000	40750000	29324000	40745000	42962000	80164	28367	59706	124140	10929000	12635000	14574000	7754800	11145000	13247000	12553000	14200000	-	-	-	-	-	-	--
MW0155088	Phe Arg Asp	-	-	478.239	436.207	[M+CH3CN+H]+	C19H28N6O6	49893	16275	59266	61886	343860	204890	22010	241820	11672	10507	12296	12682	14613	26007	13178	15611	56820	58674	68405	56264	-	-	-	-	-	-	--
MW0155099	Phe Arg Thr Glu	-	-	550.265	551.27	[M-H]-	C24H37N7O8	179910	201840	164570	223170	21013	23848	17241	28794	126370	100270	99548	151200	14467	17876	15504	13930	267390	292760	282490	245500	-	-	-	-	-	-	--
MW0155108	Phe Asn Ile Glu	-	-	520.242	521.249	[M-H]-	C24H35N5O8	9	9	9	9	122.31	9	9	9	87328	65125	63498	78609	9	189.65	9	9	73049	74792	89517	91596	-	-	-	-	-	-	--
MW0155168	Phe Gln Thr	-	-	806.406	394.185	[2M+NH4]+	C18H26N4O6	333750	325830	278750	348820	355290	234310	425670	340030	8793.9	9	10993	7446.3	201210	169010	176150	105080	98141	120730	119370	125830	-	-	-	-	-	-	--
MW0155173	Phe Glu Asp	-	-	410.155	409.149	[M+H]+	C18H23N3O8	131560	62200	76544	72338	60883	59155	46550	120470	1630400	681080	1340700	988680	172700	288110	194220	148650	602740	586710	648250	652340	-	-	-	-	-	-	--
MW0155181	Phe Glu Ile Arg	-	-	562.3	563.307	[M-H]-	C26H41N7O7	9	9	9	9	358790	324330	400020	425080	50217	37591	42054	62342	82744	103790	79456	64157	369210	373480	375130	380020	-	-	-	-	-	-	--
MW0155188	Phe Glu Ser Phe Gly	-	-	586.253	585.243	[M+H]+	C28H35N5O9	799090	752320	720090	908670	973050	686140	1046000	869410	9	9	9	9	81655	79258	74844	64240	325450	320490	357150	347220	-	-	-	-	-	-	--
MW0155193	Phe Glu Val Glu	-	-	521.222	522.233	[M-H]-	C24H34N4O9	706360	507890	489360	683310	702560	625870	842580	958950	64915	51446	67947	68651	6923.4	17722	14801	9816.8	430720	393140	449350	445530	-	-	-	-	-	-	--
MW0155226	Phe Ile Glu	-	-	390.201	407.206	[M+H-H2O]+	C20H29N3O6	155540	141080	134750	168790	165000	133840	174270	167500	10403	4917	10220	6001.9	205570	287260	247340	178210	91710	87155	74693	97897	-	-	-	-	-	-	--
MW0155231	Phe Ile Leu	-	-	409.279	391.247	[M+NH4]+	C21H33N3O4	1421400	1896000	1223900	1858600	3101100	1502800	3178500	2944400	103740	94664	109940	134910	1840800	1889100	2262000	1402800	870870	755590	771960	1019400	-	-	-	-	-	-	--
MW0155249	Phe Leu Glu Lys Asp	-	-	651.336	650.328	[M+H]+	C30H46N6O10	603670	640250	558020	608720	743330	494540	759050	762500	24638	13966	24728	17580	747950	904750	868360	598620	326310	332720	303210	371720	-	-	-	-	-	-	--
MW0155260	Phe Leu Tyr Asp	-	-	572.271	556.253	[M+NH4-2H]-	C28H36N4O8	126240	133580	106360	161830	206950	117510	198900	205750	9	9	9	9	23338	49031	33332	16101	43470	30224	37223	37986	-	-	-	-	-	-	--
MW0155265	Phe Lys Asp	-	-	409.205	408.201	[M+H]+	C19H28N4O6	686270	689120	741430	841870	803680	782450	778040	770230	659940	592490	645830	487340	542410	518140	525720	438050	672190	613050	557360	669560	-	-	-	-	-	-	--
MW0155279	Phe Lys Thr	-	-	458.237	394.222	[M+CH3CN+Na]+	C19H30N4O5	252170	171860	231560	243720	186100	172480	241150	221370	138350	94771	109630	118090	155320	228410	236380	169490	97078	171720	176440	228790	-	-	-	-	-	-	--
MW0155306	Phe Phe Thr	-	-	414.203	413.195	[M+H]+	C22H27N3O5	54464	31450	41310	57529	34425	60001	51597	59778	3791300	3343500	5453300	3966600	19168	26249	22877	23044	1926300	2267400	2757100	2223300	-	-	-	-	-	-	--
MW0155318	Phe Pro Ser	-	-	350.168	349.164	[M+H]+	C17H23N3O5	404650	434000	485150	390980	512920	359040	507740	511700	122410	128060	158270	149210	965040	1571200	1498900	1171600	355710	430270	413880	390950	-	-	-	-	-	-	--
MW0155344	Phe Thr Arg Lys	-	-	549.312	550.323	[M-H]-	C25H42N8O6	199480	129830	127470	218210	102770	124240	142380	137720	8993.5	9238.6	8403.7	10182	7974	11745	7261.2	10742	112250	100040	108720	85187	-	-	-	-	-	-	--
MW0155355	Phe Thr Lys Lys	-	-	521.313	522.317	[M-H]-	C25H42N6O6	1743500	1337600	1362400	1735300	1822100	1502000	2058400	2257000	12034	9	9	3152	35553	68317	50998	46076	588690	550010	599380	713050	-	-	-	-	-	-	--
MW0155363	Phe Thr Tyr Asp	-	-	543.208	544.217	[M-H]-	C26H32N4O9	9	9	9	9	9	9	9	9	504170	369370	420990	415360	9	9	9	9	248930	182970	257920	273880	-	-	-	-	-	-	--
MW0155386	Phe Tyr Leu Glu	-	-	588.3	570.269	[M+NH4]+	C29H38N4O8	11164000	14394000	11530000	13080000	13432000	10431000	15030000	17470000	429030	276060	386700	445570	7963600	11143000	10023000	7138300	5698400	5067600	5861600	7143000	-	-	-	-	-	-	--
MW0155392	Phe Tyr Ser	-	-	438.161	415.174	[M+Na]+	C21H25N3O6	666640	453240	784900	626970	474030	498970	370200	598240	27156	62352	63960	58346	342840	409220	448230	358800	186720	344510	432870	485940	-	-	-	-	-	-	--
MW0155394	Phe Tyr Thr	-	-	430.2	429.19	[M+H]+	C22H27N3O6	480940	464370	426690	575550	590090	483060	594850	628790	9	9	9	9	192240	186770	195720	168840	189660	171800	195090	211220	-	-	-	-	-	-	--
MW0155408	Phe Val His Arg	-	-	558.317	557.307	[M+H]+	C26H39N9O5	9	9	9	9	9	9	9	14242	227630	418470	245470	278590	243700	342000	241380	223360	449580	508270	447820	507490	-	-	-	-	-	-	--
MW0155423	Phe4Cl-Gly-OH	-	-	363.038	364.046	[M-H]-	C16H13ClN2O6	1056100	1058900	1106400	1096100	1080400	1155900	1173000	1134200	1192900	1239400	1097900	1172500	1075000	1179100	1134700	1149000	1133100	1052500	1200900	1224500	-	-	-	-	-	-	--
MW0155439	Phe-Abu-OH	-	-	357.109	358.116	[M-H]-	C18H18N2O6	9	9	9	9	9	9	9	9	21227	24805	17212	17072	105560	73750	76686	77485	45975	43497	60458	55800	-	-	-	-	-	-	--
MW0155441	Phe-Asp-OH	-	-	387.082	388.091	[M-H]-	C18H16N2O8	4560300	4644000	4842800	4817600	4802900	5016800	5015900	4988800	5050800	5556600	4690300	4942700	4462400	4837100	4640400	4713700	4954800	4625700	4838600	5108900	-	-	-	-	-	-	--
MW0155551	Phytyl phosphate	-	-	187.133	376.274	[M-2H]-	C20H41O4P	20289	15552	15529	16085	15722	12799	15751	19447	38661	32990	26154	37787	58068	80382	41365	53865	36703	33664	30411	36795	C20764	-	25245114	-	-	-	--
MW0155623	Pleurotin	-	-	353.143	354.147	[M-H]-	C21H22O5	1245500	760990	892180	1780800	11195000	11071000	11840000	14459000	9	9	9	9	40503	96699	38701	30750	1859700	1407200	1974100	2204700	-	-	344218	1404-23-5	-	-	--
MW0155760	Pro Ala Asp Lys Thr	-	-	548.3	530.27	[M+NH4]+	C22H38N6O9	404090	433380	543960	723300	427740	449070	769690	593040	398460	392860	730630	431100	744380	410920	413590	380660	309650	397880	405880	480990	-	-	-	-	-	-	--
MW0155763	Pro Ala Glu	-	-	631.293	315.143	[2M+H]+	C13H21N3O6	3085100	3036500	2821300	2667100	2639700	2021400	3522600	3057000	86524	106330	112540	110930	2648700	3576400	3134500	2166800	1181800	1338500	1297700	1690600	-	-	-	-	-	-	--
[truncated: 172 more rows]

## Sheet: Live-K12 vs HK-K12
						Live-K12				HK-K12
[truncated: 1,166 more rows]

## Sheet: Live-K2 vs HK-yfbR
						Live-K12				HK-yfbR
[truncated: 1,214 more rows]

## Sheet: HK-K12 vs HK-yfbR
						HK-K12				HK-yfbR
[truncated: 333 more rows]
