# Supplementary material for: UPRER–immunity axis acts as physiological food evaluation system that promotes aversion behavior in sensing low-quality food
Source: eLife. 2024 Sep 5;13:RP94181. doi: 10.7554/eLife.94181 (PMC11377039; doi:10.7554/eLife.94181)
Supplement: Supplementary file 5. [file elife-94181-supp5.xlsx]

## Sheet: HK-OP50 vs OP50 DEGs
	HK-OP50			OP50			Average:HK-OP50	Average：OP50
gene_id	HK3	HK6	HK9	OP1	OP4	OP7	VPT	VPA	log2FoldChange	pvalue	padj	gene_name	gene_chr	gene_start	gene_end	gene_strand	gene_length	gene_biotype	gene_description	tf_family
WBGene00011668	1285.92	1301.08	1280.86	13.017	17.9053	20.5254	1289.29	17.1492	6.24443	1.06142e-77	1.77448e-73	clec-47	V	15175673	15176324	+	606	protein_coding	C-type LECtin [Source:UniProtKB/TrEMBL;Acc:O18076]	-
WBGene00000722	30.3015	14.3608	24.1147	886.086	2184.44	5793.85	22.9256	2954.79	-7.00937	7.11903e-38	5.9508e-34	col-149	V	10291697	10292869	-	1048	protein_coding	COLlagen [Source:UniProtKB/TrEMBL;Acc:Q17417]	-
WBGene00008677	4317.02	4444.18	4597.56	795.897	705.678	685.319	4452.92	728.965	2.61052	2.36372e-32	1.31722e-28	F11A5.9	V	16214890	16217706	+	1873	protein_coding	-	-
WBGene00015933	3122.95	2087.1	1975.55	207.342	240.141	266.83	2395.2	238.104	3.33135	1.92822e-31	8.059e-28	C17H12.8	IV	6818606	6820643	+	1262	protein_coding	-	-
WBGene00016845	6859.5	6225.87	6173.36	1072.97	720.424	762.859	6419.58	852.085	2.91291	1.62771e-30	5.44241e-27	C50F7.5	IV	7726718	7727951	+	1016	protein_coding	-	-
WBGene00010473	1485.72	1024.4	853.289	103.206	62.1418	87.8029	1121.14	84.3837	3.73023	1.17994e-28	3.28772e-25	hrg-2	V	12409369	12410513	-	918	protein_coding	Cadmium-inducible lysosomal protein CDR-5; Heme Responsive protein [Source:UniProtKB/TrEMBL;Acc:G5EGC7]	-
WBGene00001397	922.302	1270.45	1433.9	67.8744	23.1715	77.5402	1208.88	56.1954	4.42753	1.07622e-27	2.57032e-24	fat-5	V	17725004	17726818	+	1104	protein_coding	Delta(9)-fatty-acid desaturase fat-5 [Source:UniProtKB/Swiss-Prot;Acc:G5ED44]	-
WBGene00009429	2531.12	2804.18	3231.37	309.619	200.118	118.591	2855.56	209.443	3.76664	1.24173e-27	2.59491e-24	irg-5	V	13737007	13738474	-	1120	protein_coding	Infection Response protein [Source:UniProtKB/TrEMBL;Acc:O02357]	-
WBGene00018731	8308.29	12485.2	11009.3	1694.07	1208.08	1168.81	10600.9	1356.99	2.96543	2.29931e-27	4.2711e-24	F53A9.8	X	8718567	8718905	-	339	protein_coding	-	-
WBGene00010745	2677.89	1545.22	1572.09	194.325	190.638	115.17	1931.73	166.711	3.53285	7.02439e-26	1.17434e-22	dod-17	IV	12976231	12978343	+	1212	protein_coding	Downstream Of DAF-16 (Regulated by DAF-16) [Source:UniProtKB/TrEMBL;Acc:O45667]	-
WBGene00012664	21795.3	25377.4	19491.2	3453.23	4487.9	3314.85	22221.3	3751.99	2.56621	1.31842e-25	2.00375e-22	Y39B6A.1	V	19201013	19203607	-	2387	protein_coding	-	-
WBGene00018729	2818.99	2850.13	2598.82	368.195	404.448	550.764	2755.98	441.136	2.6442	1.2512e-24	1.74314e-21	F53A9.6	X	8713461	8713952	-	435	protein_coding	-	-
WBGene00002253	7166.3	6851.04	6584.24	1446.75	1017.44	919.08	6867.19	1127.76	2.60582	7.79864e-24	1.0029e-20	lbp-1	X	3259087	3259855	+	653	protein_coding	Fatty acid-binding protein homolog 1 [Source:UniProtKB/Swiss-Prot;Acc:Q20223]	-
WBGene00003767	2647.59	3085.65	3501.27	387.721	506.614	578.131	3078.17	490.822	2.6496	1.64908e-23	1.96924e-20	nlp-29	V	3984413	3984847	+	366	protein_coding	Neuropeptide-like protein 29 QWGYGGY-amide GYGGYGGY-amide GMYGGY-amide GMYGGW-amide [Source:UniProtKB/Swiss-Prot;Acc:O44664]	-
WBGene00007833	487.665	345.616	494.351	42.7702	18.9585	21.6657	442.544	27.7981	3.98195	1.30506e-22	1.45453e-19	oac-6	V	16302717	16306156	+	2215	protein_coding	O-ACyltransferase homolog [Source:UniProtKB/TrEMBL;Acc:O45282]	-
WBGene00010050	3824.62	2900.87	2955.9	501.155	640.377	392.262	3227.13	511.265	2.65782	1.63082e-21	1.704e-18	F54D5.4	II	11569818	11571002	+	620	protein_coding	-	-
WBGene00271815	214.004	399.229	433.137	24.1744	15.7988	11.403	348.79	17.1254	4.33579	2.96832e-21	2.91908e-18	K04A8.21	V	6556656	6557144	-	400	protein_coding	-	-
WBGene00003999	1355.04	1403.52	1379.17	237.096	120.071	111.749	1379.25	156.305	3.13821	9.1734e-21	8.52005e-18	pgp-5	X	10854320	10859297	-	3887	protein_coding	p-GlycoProtein related [Source:UniProtKB/TrEMBL;Acc:B6VQ78]	-
WBGene00014732	214.951	525.604	487.859	28.8234	18.9585	18.2448	409.471	22.0089	4.21079	1.71751e-20	1.51123e-17	F09F3.8	V	13869888	13872529	+	2233	pseudogene	-	-
WBGene00010123	2951.55	1109.61	1138.95	88.3297	159.041	82.1014	1733.37	109.824	3.98039	1.8841e-20	1.57492e-17	F55G11.2	IV	12967448	12969289	-	1078	protein_coding	-	-
WBGene00011979	489.559	356.147	458.179	58.5765	40.0235	50.1731	434.628	49.5911	3.12939	3.58003e-20	2.85005e-17	T24B8.5	II	9082626	9083146	-	423	protein_coding	-	-
WBGene00019830	3127.68	4347.48	3673.78	626.676	461.324	264.549	3716.31	450.85	3.04205	7.37818e-20	5.60675e-17	hrg-1	X	4008058	4016185	-	1415	protein_coding	Heme transporter hrg-1 [Source:UniProtKB/Swiss-Prot;Acc:Q21642]	-
WBGene00017501	131.622	170.414	135.413	839.597	987.949	751.456	145.817	859.668	-2.55988	8.06797e-20	5.86436e-17	pud-3	V	2324510	2326827	-	758	protein_coding	5C820; Protein Up-regulated in Daf-2(Gf) [Source:UniProtKB/TrEMBL;Acc:G5EEV5]	-
WBGene00017506	1825.66	1899.45	2172.18	274.287	308.603	453.839	1965.76	345.576	2.50928	5.58825e-19	3.89269e-16	F16B4.4	V	1594019	1594665	+	498	protein_coding	-	-
WBGene00015340	282.183	799.416	924.705	49.2787	18.9585	18.2448	668.768	28.8273	4.52628	6.36722e-19	4.25789e-16	C02E7.7	V	4918154	4918585	-	301	protein_coding	-	-
WBGene00019738	3398.5	2928.64	2796.38	452.806	610.886	280.513	3041.17	448.068	2.76233	1.65524e-18	1.04007e-15	clec-265	X	3031723	3033203	+	1178	protein_coding	C-type LECtin [Source:UniProtKB/TrEMBL;Acc:Q21471]	-
WBGene00001068	464.939	265.195	282.884	1761.95	2928.04	2467.6	337.673	2385.86	-2.82073	1.67974e-18	1.04007e-15	dpy-6	X	8450381	8455640	-	4041	protein_coding	DumPY: shorter than wild-type [Source:UniProtKB/TrEMBL;Acc:Q94185]	-
WBGene00005002	138.251	68.9316	47.3019	1116.67	1184.91	709.265	84.828	1003.62	-3.56499	2.05359e-18	1.22614e-15	spp-17	I	1016403	1017180	+	371	protein_coding	SaPosin-like Protein family [Source:UniProtKB/TrEMBL;Acc:Q8WSN3]	-
WBGene00009973	4747.87	4254.61	4319.31	1279.39	1050.09	1149.42	4440.6	1159.63	1.93693	6.61831e-18	3.81534e-15	F53C11.3	V	13782399	13784102	+	1100	protein_coding	Uncharacterized oxidoreductase F53C11.3 [Source:UniProtKB/Swiss-Prot;Acc:Q93761]	-
WBGene00001387	5293.29	7210.06	9166.36	1313.79	768.873	1303.36	7223.24	1128.67	2.67798	1.04312e-17	5.81294e-15	far-3	V	12996787	12997524	-	675	protein_coding	Fatty Acid/Retinol binding protein [Source:UniProtKB/TrEMBL;Acc:Q19478]	-
WBGene00018730	2961.97	4921.91	4478.84	829.369	777.299	871.188	4120.91	825.952	2.31888	1.10022e-17	5.93336e-15	F53A9.7	X	8716532	8716929	-	398	protein_coding	-	-
WBGene00002827	139.197	194.349	185.498	887.946	811.003	990.919	173.015	896.623	-2.3735	1.31341e-17	6.86172e-15	let-653	IV	11885530	11891081	+	2716	protein_coding	-	-
WBGene00003091	4381.41	3241.7	3308.35	696.41	679.347	355.773	3643.82	577.177	2.65769	3.36735e-17	1.70592e-14	lys-2	V	10280310	10281474	-	928	protein_coding	Lysozyme-like protein 2 [Source:UniProtKB/Swiss-Prot;Acc:O62416]	-
WBGene00019404	733.864	676.87	714.166	105.996	64.2483	135.695	708.3	101.98	2.79739	5.37935e-17	2.64506e-14	K05B2.4	X	4919019	4920988	-	1341	protein_coding	-	-
WBGene00010128	1065.29	899.941	1029.51	208.272	166.414	104.907	998.246	159.864	2.63987	8.49186e-17	4.0562e-14	F55G11.8	IV	12962808	12964625	+	1144	protein_coding	-	-
WBGene00009431	3515.92	5156.47	5621.5	905.612	963.725	515.415	4764.63	794.917	2.5831	3.95828e-16	1.83818e-13	dct-17	V	13727763	13730776	-	2273	protein_coding	DAF-16/FOXO Controlled, germline Tumor affecting [Source:UniProtKB/TrEMBL;Acc:Q52GY1]	-
WBGene00013647	1094.64	651.021	575.97	54.8574	77.9406	123.152	773.877	85.3167	3.18521	4.36428e-16	1.97195e-13	Y105C5B.5	IV	15899935	15901225	-	490	protein_coding	-	-
WBGene00017727	3638.07	4079.41	3795.28	1034.85	1203.87	1053.64	3837.59	1097.45	1.80608	5.10168e-16	2.24447e-13	F22H10.3	X	16677340	16677738	-	399	protein_coding	-	-
WBGene00010755	2471.47	2966.93	2835.33	741.04	603.513	443.576	2757.91	596.043	2.20931	6.79848e-16	2.91428e-13	vglu-2	III	10295137	10298687	+	2122	protein_coding	Vesicular GLUtamate transporter [Source:UniProtKB/TrEMBL;Acc:G5EEK1]	-
WBGene00019472	303.015	488.266	376.56	26.9638	40.0235	59.2955	389.28	42.0943	3.21637	8.20746e-16	3.43031e-13	cyp-35B1	V	3939032	3941235	+	1646	protein_coding	CYtochrome P450 family [Source:UniProtKB/TrEMBL;Acc:O44650]	-
WBGene00044724	109.843	179.988	226.307	4.64893	7.37276	0	172.046	4.00723	5.39766	1.24792e-15	5.08849e-13	R02E4.3	X	4101687	4102125	-	386	protein_coding	-	-
WBGene00015709	6079.24	2989.91	2872.43	465.823	743.595	437.874	3980.53	549.098	2.85783	1.90806e-15	7.59499e-13	cyp-33A1	V	7679314	7681615	-	1747	protein_coding	CYtochrome P450 family [Source:UniProtKB/TrEMBL;Acc:Q27470]	-
WBGene00000981	2908	2857.79	3081.11	677.814	693.039	371.737	2948.97	580.864	2.34327	2.18531e-15	8.49628e-13	dhs-18	V	11045696	11046899	-	1016	protein_coding	DeHydrogenases, Short chain [Source:UniProtKB/TrEMBL;Acc:Q18639]	-
WBGene00004374	174.234	304.448	500.843	27.8936	26.3313	21.6657	326.508	25.2968	3.68749	2.3783e-15	9.03647e-13	rme-2	IV	5469961	5473174	+	2932	protein_coding	Receptor Mediated Endocytosis [Source:UniProtKB/TrEMBL;Acc:O44191]	-
WBGene00004239	205.482	440.397	545.363	45.5595	21.065	21.6657	397.08	29.4301	3.74592	4.25723e-15	1.58161e-12	puf-3	IV	13510307	13512162	-	1737	protein_coding	PUF (Pumilio/FBF) domain-containing [Source:UniProtKB/TrEMBL;Acc:Q9U2G4]	-
WBGene00010966	2151.41	1096.2	1185.33	6476.89	9912.15	12592.3	1477.65	9660.45	-2.70875	5.17744e-15	1.88166e-12	nduo-3	MtDNA	11356	11691	+	336	protein_coding	NADH-ubiquinone oxidoreductase chain 3 [Source:UniProtKB/Swiss-Prot;Acc:P24895]	-
WBGene00019357	2273.56	2286.23	2145.28	444.438	349.679	634.006	2235.02	476.041	2.23175	5.57891e-15	1.98443e-12	cpg-8	V	4691605	4692433	-	829	protein_coding	Chondroitin proteoglycan 8 [Source:UniProtKB/Swiss-Prot;Acc:Q21175]	-
WBGene00022307	2035.88	2132.09	2302.02	576.468	620.365	671.635	2156.67	622.823	1.79224	5.7321e-15	1.99644e-12	Y77E11A.2	IV	1457075	1459521	+	1280	protein_coding	-	-
WBGene00011330	7085.81	8847.18	8097.9	1483.94	1489.3	573.57	8010.3	1182.27	2.75996	6.84925e-15	2.33685e-12	T01D3.6	V	13716824	13720402	+	2943	protein_coding	-	-
WBGene00018601	178.021	170.414	188.28	13.9468	11.5858	21.6657	178.905	15.7327	3.51529	1.03889e-14	3.47365e-12	F48C1.9	I	5332249	5332780	-	324	protein_coding	-	-
WBGene00045275	887.266	579.217	378.415	50.2085	97.9523	58.1552	614.966	68.772	3.16168	1.37556e-14	4.50915e-12	F18E3.12	V	7414941	7415344	+	404	protein_coding	-	-
WBGene00009221	9967.3	13738.5	8839.89	1855.85	1968.53	705.844	10848.5	1510.07	2.84457	2.98472e-14	9.59587e-12	acs-2	V	15567394	15569889	+	2075	protein_coding	Fatty Acid CoA Synthetase family [Source:UniProtKB/TrEMBL;Acc:O18693]	-
WBGene00001758	481.983	341.786	407.167	1378.87	2424.58	2263.49	410.312	2022.32	-2.30101	3.14589e-14	9.92322e-12	gst-10	V	2561690	2564701	+	776	protein_coding	Glutathione S-transferase P 10 [Source:UniProtKB/Swiss-Prot;Acc:Q9N4X8]	-
WBGene00004000	835.185	430.823	631.619	105.996	57.9288	102.627	632.542	88.8504	2.83119	4.07336e-14	1.26108e-11	pgp-6	X	10871181	10877465	-	4052	protein_coding	p-GlycoProtein related [Source:UniProtKB/TrEMBL;Acc:Q1ZXU6]	-
WBGene00020948	420.433	845.37	1253.04	118.083	66.3548	100.346	839.613	94.928	3.14388	5.47549e-14	1.64376e-11	era-1	V	6703057	6704573	+	1369	protein_coding	Embryonic mRna (mRNA) Anterior [Source:UniProtKB/TrEMBL;Acc:O45146]	-
WBGene00020946	695.987	1213.01	655.734	164.572	151.668	115.17	854.909	143.803	2.57026	5.50606e-14	1.64376e-11	W02D7.11	V	8302887	8304469	-	252	protein_coding	-	-
WBGene00009453	3533.91	2805.13	2693.42	933.506	849.974	751.456	3010.82	844.978	1.83287	8.75019e-14	2.56642e-11	F36A2.3	I	8798785	8801694	+	1258	protein_coding	-	-
WBGene00007947	1270.77	1199.6	1231.7	394.229	333.881	327.265	1234.02	351.792	1.80992	9.24987e-14	2.66619e-11	C35A5.3	V	10499355	10501395	-	1514	protein_coding	-	-
WBGene00015198	225.367	118.716	106.661	0	0	0	150.248	0	9.62075	1.05426e-13	2.98732e-11	clec-2	II	3020561	3023431	-	1260	protein_coding	C-type LECtin [Source:UniProtKB/TrEMBL;Acc:O17166]	-
WBGene00012593	317.219	472.948	448.904	62.2957	81.1003	42.191	413.023	61.8623	2.73702	1.20201e-13	3.34921e-11	nspe-7	II	12627187	12627570	+	338	protein_coding	Nematode Specific Peptide family, group E [Source:UniProtKB/TrEMBL;Acc:Q9NAJ6]	-
WBGene00019368	501.868	623.257	697.471	2838.64	2881.69	1892.89	607.532	2537.74	-2.0626	1.61255e-13	4.41945e-11	K03H6.2	IV	1510546	1515251	+	1120	protein_coding	-	-
WBGene00015102	915.673	1706.06	2869.65	286.374	128.497	218.937	1830.46	211.269	3.11437	2.14189e-13	5.77551e-11	cpg-2	III	7102086	7103990	-	1729	protein_coding	Chondroitin proteoglycan-2 [Source:UniProtKB/Swiss-Prot;Acc:P41996]	-
WBGene00017567	1655.22	1117.27	958.095	209.202	270.686	295.337	1243.53	258.408	2.26764	2.49203e-13	6.61297e-11	F18E3.11	V	7413437	7413840	+	404	protein_coding	-	-
WBGene00004134	739.546	420.292	319.983	2555.05	2724.76	2360.42	493.274	2546.74	-2.36828	8.15278e-13	2.12966e-10	myrf-1	II	10496987	10502541	-	3654	protein_coding	Myelin regulatory factor homolog 1 Myelin regulatory factor homolog 1, N-terminal Myelin regulatory factor homolog 1, C-terminal [Source:UniProtKB/Swiss-Prot;Acc:G5EFI7]	NDT80/PhoG
WBGene00003766	1276.45	1245.56	1150.08	276.147	390.756	347.791	1224.03	338.231	1.85627	9.41321e-13	2.42108e-10	nlp-28	V	3987900	3988312	+	331	protein_coding	Neuropeptide-like protein 28 QWGYGGY-amide GYGGYGGY-amide GMYGGY-amide GMYGGW-amide [Source:UniProtKB/Swiss-Prot;Acc:O44665]	-
WBGene00010440	1846.5	2226.87	1799.33	408.176	456.058	640.847	1957.57	501.694	1.96498	9.91062e-13	2.51039e-10	ttr-51	IV	13250648	13252311	-	488	protein_coding	TransThyretin-Related family domain [Source:UniProtKB/TrEMBL;Acc:O62289]	-
WBGene00007875	2549.11	1284.81	1307.76	280.796	364.425	179.027	1713.89	274.749	2.64051	1.10489e-12	2.75694e-10	dod-24	IV	12940106	12941405	-	1208	protein_coding	Downstream Of DAF-16 (Regulated by DAF-16) [Source:UniProtKB/TrEMBL;Acc:Q9XUH3]	-
WBGene00016379	466.832	412.632	524.958	79.9616	99.0056	41.0507	468.141	73.3393	2.67135	1.17669e-12	2.89293e-10	C33H5.13	IV	7791704	7792263	-	504	protein_coding	-	-
WBGene00013900	695.041	404.973	433.137	97.6276	35.8105	38.7701	511.05	57.4027	3.14785	1.24023e-12	3.00495e-10	ugt-18	V	12820265	12822758	+	1674	protein_coding	UDP-glucuronosyltransferase [Source:UniProtKB/TrEMBL;Acc:Q23323]	-
WBGene00008803	3884.27	3934.85	3644.1	1374.22	1330.26	1289.68	3821.07	1331.39	1.52097	1.26293e-12	3.01623e-10	lips-10	II	8439118	8442151	+	1075	protein_coding	LIPaSe related [Source:UniProtKB/TrEMBL;Acc:Q19462]	-
WBGene00012608	3198.7	3745.29	2494.01	975.346	866.826	742.334	3146	861.502	1.86826	1.43169e-12	3.35732e-10	hphd-1	II	12994358	12996571	-	1687	protein_coding	Hydroxyacid-oxoacid transhydrogenase, mitochondrial [Source:UniProtKB/Swiss-Prot;Acc:Q9U2M4]	-
WBGene00044074	5.68153	5.7443	12.0573	106.925	148.508	115.17	7.82772	123.535	-3.97705	1.46424e-12	3.35732e-10	mltn-5	II	13925268	13930516	+	2240	protein_coding	MLt-TeN (Mlt-10) related [Source:UniProtKB/TrEMBL;Acc:Q5FC43]	-
WBGene00010597	1586.09	936.321	959.95	103.206	215.916	236.042	1160.79	185.055	2.65105	1.46649e-12	3.35732e-10	K06A4.7	V	9490028	9491715	-	398	protein_coding	-	-
WBGene00009397	1391.97	915.259	854.216	250.113	253.833	247.445	1053.82	250.464	2.07291	1.48607e-12	3.35732e-10	clec-66	II	12904398	12906686	+	1328	protein_coding	C-type LECtin [Source:UniProtKB/TrEMBL;Acc:O45445]	-
WBGene00002269	8247.69	7168.89	7843.76	2585.74	2767.94	2081.04	7753.45	2478.24	1.64543	1.56171e-12	3.48115e-10	lec-6	III	599509	600366	-	541	protein_coding	Galectin [Source:UniProtKB/TrEMBL;Acc:Q9N384]	-
WBGene00018958	1480.99	1993.27	1778.92	529.978	548.744	504.012	1751.06	527.578	1.73067	1.90169e-12	4.13116e-10	F56C11.6	I	171340	175989	+	1792	protein_coding	Carboxylic ester hydrolase [Source:UniProtKB/TrEMBL;Acc:H2L069]	-
WBGene00010456	355.096	539.965	424.789	1567.62	2343.48	1598.7	439.95	1836.6	-2.06165	1.90273e-12	4.13116e-10	K01C8.1	II	8264661	8267360	+	1861	protein_coding	-	-
WBGene00044901	365.512	445.184	521.248	99.4871	88.4731	103.767	443.981	97.2424	2.19109	2.08901e-12	4.47745e-10	Y41G9A.10	X	2945803	2946570	-	725	protein_coding	-	-
WBGene00019619	12310	11610.2	10776.5	2254.73	3493.63	1429.93	11565.6	2392.77	2.27301	3.1097e-12	6.58075e-10	asp-14	X	6444189	6446664	-	1202	protein_coding	ASpartyl Protease [Source:UniProtKB/TrEMBL;Acc:Q94271]	-
WBGene00010746	157.189	92.8662	75.1265	0	0	0	108.394	0	9.14966	3.41352e-12	7.13341e-10	K10D11.2	IV	12979017	12981940	+	1023	protein_coding	-	-
WBGene00018643	229.155	149.352	148.398	18.5957	13.6923	23.9463	175.635	18.7447	3.23145	4.00398e-12	8.26401e-10	drd-50	IV	4117732	4119179	+	964	protein_coding	Dietary restriction down regulated [Source:UniProtKB/TrEMBL;Acc:Q9GZE5]	-
WBGene00009701	231.996	365.721	702.108	60.4361	41.0768	50.1731	433.275	50.562	3.09771	4.16908e-12	8.49983e-10	egg-3	II	10882408	10884462	-	1815	protein_coding	Protein tyrosine phosphatase-like protein egg-3 [Source:UniProtKB/Swiss-Prot;Acc:Q20402]	-
WBGene00021872	1694.04	818.563	730.86	128.311	145.349	225.779	1081.16	166.479	2.70066	4.68325e-12	9.43308e-10	clec-85	IV	2854339	2855456	+	958	protein_coding	C-type LECtin [Source:UniProtKB/TrEMBL;Acc:U4PAM5]	-
WBGene00013594	1084.23	959.299	1131.53	272.427	271.739	140.257	1058.35	228.141	2.21225	5.93574e-12	1.18135e-09	Y87G2A.2	I	13534718	13537014	+	949	protein_coding	-	-
WBGene00012463	4299.02	4399.18	4294.27	1615.97	1566.18	1583.87	4330.82	1588.68	1.44679	6.18236e-12	1.21596e-09	Y17G7B.10	II	12049583	12059866	+	1819	protein_coding	NAD kinase 2, mitochondrial [Source:UniProtKB/TrEMBL;Acc:Q9XXI6]	-
WBGene00017660	129.728	163.713	155.818	19.5255	14.7455	18.2448	149.753	17.5053	3.09496	8.72397e-12	1.6959e-09	F21C10.11	V	9123489	9123809	+	243	protein_coding	-	-
WBGene00011042	2343.63	2808.01	2417.96	909.331	710.944	818.734	2523.2	813.003	1.63371	9.42476e-12	1.81107e-09	R05H10.1	II	14852430	14853594	+	855	protein_coding	-	-
WBGene00017498	147.72	109.142	88.1113	431.421	643.536	590.674	114.991	555.211	-2.27134	9.81481e-12	1.86459e-09	pud-4	V	2326678	2327262	+	544	protein_coding	Protein Up-regulated in Daf-2(Gf) [Source:UniProtKB/TrEMBL;Acc:M1ZMJ3]	-
WBGene00017986	214.951	474.862	843.086	42.7702	29.491	70.6985	510.967	47.6532	3.42551	1.00655e-11	1.89073e-09	F32D1.7	V	4374974	4376173	-	1076	protein_coding	-	-
WBGene00022597	807.724	779.31	622.344	213.851	212.757	181.307	736.46	202.638	1.86098	1.11553e-11	2.07216e-09	ZC395.5	III	5267809	5268581	+	373	protein_coding	-	-
WBGene00007681	928.93	741.973	946.037	2338.41	3529.44	3321.69	872.313	3063.18	-1.81197	1.19753e-11	2.20004e-09	C18D11.3	III	11823327	11824975	+	1331	protein_coding	-	-
WBGene00008602	889.159	891.324	884.823	238.955	94.7926	176.746	888.436	170.165	2.3829	1.36252e-11	2.47593e-09	oac-14	X	10139374	10142013	-	2240	protein_coding	O-ACyltransferase homolog [Source:UniProtKB/TrEMBL;Acc:A0A0K3AWB0]	-
WBGene00014136	461.151	385.826	346.88	88.3297	106.378	76.4	397.952	90.3693	2.13795	3.00502e-11	5.40192e-09	ZK896.5	IV	12876965	12879667	-	1531	protein_coding	-	-
WBGene00015814	1943.08	2066.03	2407.76	7276.51	8597.69	5458.61	2138.96	7110.93	-1.73315	3.05065e-11	5.42562e-09	oatr-1	III	6394223	6396182	-	1502	protein_coding	Probable ornithine aminotransferase, mitochondrial [Source:UniProtKB/Swiss-Prot;Acc:Q18040]	-
WBGene00009396	2118.26	1797.97	1646.29	542.065	616.152	370.597	1854.17	509.605	1.86281	4.73933e-11	8.33285e-09	clec-65	II	12901264	12903336	+	1226	protein_coding	C-type LECtin [Source:UniProtKB/TrEMBL;Acc:O45443]	-
WBGene00017659	4340.69	4432.69	3323.19	1475.57	1294.45	1236.08	4032.19	1335.37	1.59415	4.78499e-11	8.33285e-09	F21C10.10	V	9096007	9097233	+	1049	protein_coding	-	-
WBGene00009515	53.9745	43.0823	33.3896	395.159	472.91	164.203	43.4821	344.091	-2.98524	5.17837e-11	8.92495e-09	clec-170	IV	1266866	1274425	+	1634	protein_coding	C-type LECtin [Source:UniProtKB/TrEMBL;Acc:A4F318]	-
WBGene00012648	781.21	491.138	599.157	1779.61	2546.76	2679.7	623.835	2335.36	-1.90425	6.12077e-11	1.04415e-08	Y39A1A.9	III	10630070	10633501	-	1953	protein_coding	-	-
WBGene00018971	3074.65	1434.16	1474.71	442.578	456.058	328.406	1994.51	409.014	2.28545	7.06247e-11	1.18464e-08	clec-67	IV	3922165	3925045	+	2056	protein_coding	C-type LECtin [Source:UniProtKB/TrEMBL;Acc:Q8ITX4]	-
WBGene00021625	463.992	1002.38	1425.55	170.151	131.656	175.606	963.974	159.138	2.59877	7.08603e-11	1.18464e-08	Y47D7A.13	V	4434883	4435928	-	1046	protein_coding	-	-
WBGene00008519	1705.41	2917.15	3289.8	713.146	283.325	449.277	2637.45	481.916	2.45166	7.3846e-11	1.22233e-08	cyp-13B1	X	13406674	13409644	-	1653	protein_coding	Putative cytochrome P450 cyp-13B1 [Source:UniProtKB/Swiss-Prot;Acc:O17624]	-
WBGene00002083	6005.38	5362.31	5749.5	16138.3	19612.6	13860.3	5705.73	16537.1	-1.53523	8.46868e-11	1.37069e-08	inf-1	III	6930039	6931953	+	1675	protein_coding	Eukaryotic initiation factor 4A [Source:UniProtKB/Swiss-Prot;Acc:P27639]	-
WBGene00004878	248.093	266.153	208.685	43.7	50.556	26.2268	240.977	40.161	2.58108	8.50879e-11	1.37069e-08	smf-3	IV	2619875	2625438	+	1772	protein_coding	NRAMP-like transporter smf-3 [Source:UniProtKB/Swiss-Prot;Acc:Q95XG8]	-
WBGene00003915	1768.85	1428.42	1266.95	4536.43	4559.52	4083.41	1488.07	4393.12	-1.56185	8.60629e-11	1.37069e-08	pan-1	III	4562738	4566276	+	2197	protein_coding	P-granule-associated novel protein 1 [Source:UniProtKB/Swiss-Prot;Acc:Q9U3A0]	-
WBGene00017060	512.285	640.49	654.806	178.519	89.5263	88.9432	602.527	118.996	2.33663	8.60883e-11	1.37069e-08	D2063.1	V	4327121	4328736	+	1078	protein_coding	-	-
WBGene00020672	434.637	477.735	285.666	62.2957	32.6508	87.8029	399.346	60.9165	2.71473	9.33234e-11	1.47187e-08	T22B7.3	X	5647378	5650213	+	955	protein_coding	-	-
WBGene00000650	385.397	869.305	959.95	134.819	42.13	103.767	738.217	93.5721	2.97844	1.00314e-10	1.56733e-08	col-74	II	5830867	5832014	+	1091	protein_coding	COLlagen [Source:UniProtKB/TrEMBL;Acc:Q23422]	-
WBGene00012970	909.992	981.319	1107.42	284.515	123.23	95.785	999.577	167.843	2.57119	1.01935e-10	1.57792e-08	Y48A6B.9	III	11033172	11036080	+	1247	protein_coding	Enoyl-[acyl-carrier-protein] reductase, mitochondrial [Source:UniProtKB/Swiss-Prot;Acc:Q9XXC8]	-
WBGene00007682	732.917	688.359	636.257	107.855	63.1951	189.289	685.844	120.113	2.51568	1.1658e-10	1.78806e-08	C18D11.6	III	11810556	11811046	+	363	protein_coding	-	-
WBGene00001391	2613.5	3606.47	2559.87	1033.92	709.891	858.644	2926.61	867.486	1.75405	1.22782e-10	1.86606e-08	far-7	II	319785	321445	+	706	protein_coding	Fatty Acid/Retinol binding protein [Source:UniProtKB/TrEMBL;Acc:A0A0K3AWY0]	-
WBGene00004196	505.656	592.621	684.486	182.238	140.082	164.203	594.254	162.174	1.87291	1.26716e-10	1.89501e-08	prx-11	I	12971120	12972347	+	1228	protein_coding	PeRoXisome assembly factor [Source:UniProtKB/TrEMBL;Acc:O62103]	-
WBGene00007807	1675.1	1161.31	1136.17	433.28	269.632	246.304	1324.19	316.406	2.06395	1.26954e-10	1.89501e-08	C29F3.7	V	15354833	15357572	+	1720	protein_coding	-	-
WBGene00019968	725.342	918.131	865.346	245.464	206.437	283.934	836.273	245.278	1.77002	1.30305e-10	1.92656e-08	R08F11.4	V	3803845	3805531	-	1226	protein_coding	-	-
WBGene00004241	409.07	726.654	1105.57	99.4871	60.0353	10.2627	747.097	56.595	3.71699	1.31372e-10	1.92656e-08	puf-5	II	8575541	8577732	+	2014	protein_coding	Pumilio domain-containing protein 5 [Source:UniProtKB/Swiss-Prot;Acc:Q20757]	-
WBGene00017127	775.529	1262.79	1166.78	310.549	187.479	274.812	1068.37	257.613	2.05164	1.38391e-10	2.01185e-08	E04F6.8	II	7210731	7211380	-	455	protein_coding	-	-
WBGene00006650	24080.2	23000.2	18670.3	7789.75	8251.17	8335.58	21916.9	8125.5	1.43153	1.50191e-10	2.16457e-08	tts-1	X	1504131	1504841	-	711	ncRNA	-	-
WBGene00016769	7594.31	11500.1	11339.5	2540.18	2666.83	1070.74	10144.6	2092.58	2.27719	1.80977e-10	2.58595e-08	C49C8.5	IV	8648596	8653677	-	1469	protein_coding	-	-
WBGene00017123	3586.94	4030.59	4267.37	1366.79	1002.69	623.743	3961.63	997.741	1.98882	1.89292e-10	2.68185e-08	maoc-1	II	7196276	7197495	+	1063	protein_coding	MAO-C-like dehydratase domain [Source:UniProtKB/TrEMBL;Acc:Q19058]	-
WBGene00018760	6517.66	7566.2	6902.36	2630.37	2833.25	2236.12	6995.41	2566.58	1.44649	1.97511e-10	2.77478e-08	irg-3	V	2592487	2595062	+	820	protein_coding	Infection Response protein [Source:UniProtKB/TrEMBL;Acc:P91316]	-
WBGene00022679	659.057	1320.23	1332.8	196.185	68.4613	220.077	1104.03	161.575	2.77261	2.08616e-10	2.90637e-08	ZK180.5	IV	4515044	4517169	-	1929	protein_coding	-	-
WBGene00012176	29.3546	8.61646	29.6796	127.381	308.603	286.215	22.5502	240.733	-3.41425	2.12586e-10	2.9372e-08	W01C9.2	II	8536133	8538603	+	2015	protein_coding	-	-
WBGene00011408	837.079	675.913	1005.4	2290.06	3345.13	2767.5	839.463	2800.9	-1.73822	2.14401e-10	2.93799e-08	nifk-1	III	4692098	4693303	-	1069	protein_coding	NIFK homolog [Source:UniProtKB/TrEMBL;Acc:Q22135]	-
WBGene00015538	785.945	832.924	905.228	2122.7	2291.87	2555.41	841.366	2323.33	-1.46526	2.16691e-10	2.94524e-08	sams-3	IV	5848657	5850845	+	1999	protein_coding	Probable S-adenosylmethionine synthase 3 [Source:UniProtKB/Swiss-Prot;Acc:P50305]	-
WBGene00010063	1850.28	1861.15	1816.95	598.782	469.75	712.686	1842.8	593.74	1.63426	2.20512e-10	2.973e-08	dhrs-4	V	12922608	12924156	+	837	protein_coding	Dehydrogenase/reductase SDR family member 4 [Source:UniProtKB/Swiss-Prot;Acc:G5EGA6]	-
WBGene00013244	606.977	596.45	437.774	158.064	146.402	149.379	547.067	151.282	1.85408	2.32581e-10	3.11063e-08	Y56A3A.33	III	11999497	12002950	-	1108	protein_coding	-	-
WBGene00015339	154.348	229.772	301.434	29.7532	10.5325	35.3492	228.518	25.2116	3.18132	2.48414e-10	3.29601e-08	C02E7.6	V	4919207	4919586	+	324	protein_coding	-	-
WBGene00000641	121.206	297.746	417.369	26.034	25.278	41.0507	278.774	30.7876	3.18256	2.57398e-10	3.38833e-08	col-65	I	11489158	11490630	-	1048	protein_coding	COLlagen [Source:UniProtKB/TrEMBL;Acc:Q9XUT4]	-
WBGene00009110	561.525	348.488	486.004	126.451	113.751	96.9253	465.339	112.376	2.04854	3.61974e-10	4.72772e-08	F25D1.5	V	10545741	10546799	-	969	protein_coding	-	-
WBGene00001775	1051.08	959.299	894.098	2585.74	3366.19	2486.99	968.16	2812.97	-1.53879	4.09685e-10	5.30939e-08	gst-27	II	15164890	15165731	-	742	protein_coding	Glutathione S-Transferase [Source:UniProtKB/TrEMBL;Acc:Q9NAB3]	-
WBGene00021253	713.979	828.137	725.295	267.778	241.194	215.516	755.804	241.496	1.6451	4.18862e-10	5.38657e-08	Y22D7AL.15	III	1658207	1659863	-	539	protein_coding	-	zf-LITAF-like
WBGene00009659	36.9299	59.3578	125.211	0	0	0	73.8329	0	8.59605	5.68866e-10	7.25977e-08	F43G6.7	II	11810790	11811665	+	393	protein_coding	-	-
WBGene00010351	578.569	1080.89	1537.77	197.115	159.041	262.268	1065.74	206.141	2.37082	6.47447e-10	8.20002e-08	cbd-1	IV	11372991	11377627	+	4221	protein_coding	Chitin-binding domain protein cbd-1 [Source:UniProtKB/Swiss-Prot;Acc:O45599]	-
WBGene00008886	1498.98	1208.22	1055.48	392.37	297.017	167.624	1254.23	285.67	2.13279	6.92781e-10	8.70821e-08	F16C3.2	I	10150280	10155131	-	1137	protein_coding	-	-
WBGene00018725	79.5414	122.545	140.978	10.2277	5.26626	0	114.355	5.16464	4.42887	7.89094e-10	9.84483e-08	kreg-1	X	8709764	8710137	+	374	protein_coding	-	-
WBGene00013541	1386.29	1694.57	1653.71	558.802	373.904	254.286	1578.19	395.664	1.99463	8.00937e-10	9.91857e-08	lonp-2	III	12107774	12113471	+	2364	protein_coding	Lon protease homolog 2, peroxisomal [Source:UniProtKB/Swiss-Prot;Acc:Q9XW87]	-
WBGene00044294	1027.41	1086.63	1005.4	2370.03	3195.56	3190.55	1039.81	2918.71	-1.4889	8.12577e-10	9.98873e-08	C01B10.11	IV	6657981	6660434	+	1122	protein_coding	-	-
WBGene00021276	755.643	711.336	767.032	1843.77	2424.58	1951.05	744.671	2073.13	-1.47707	8.41037e-10	1.02631e-07	Y23H5B.5	I	2498134	2506259	+	2265	protein_coding	-	-
WBGene00021088	6253.47	5908.97	6653.8	18427.4	20764.8	13945.8	6272.08	17712.7	-1.49778	8.88741e-10	1.07666e-07	W08E12.7	IV	3295135	3297225	+	1890	protein_coding	-	-
WBGene00010234	283.13	691.231	1037.86	120.872	50.556	95.785	670.74	89.0711	2.91156	9.55443e-10	1.14914e-07	ttr-50	IV	11640047	11641015	-	914	protein_coding	TransThyretin-Related family domain [Source:UniProtKB/TrEMBL;Acc:G5EE48]	-
WBGene00016607	776.476	619.427	767.032	1711.74	2635.23	2523.48	720.978	2290.15	-1.66722	9.87154e-10	1.1788e-07	C43E11.9	I	4267199	4267967	-	674	protein_coding	60S ribosome subunit biogenesis protein NIP7 homolog [Source:UniProtKB/TrEMBL;Acc:P91154]	-
WBGene00022257	252.828	436.567	665.936	87.3999	46.343	84.382	451.777	72.7083	2.63496	1.05674e-09	1.25295e-07	puf-11	IV	6421589	6423489	+	1717	protein_coding	PUF (Pumilio/FBF) domain-containing [Source:UniProtKB/TrEMBL;Acc:Q8IU00]	-
WBGene00009394	25829.2	18467	17160.4	4965.99	7620.27	3865.61	20485.5	5483.96	1.9013	1.16144e-09	1.36739e-07	clec-63	II	12895638	12897462	+	1313	protein_coding	C-type LECtin [Source:UniProtKB/TrEMBL;Acc:O45444]	-
WBGene00003610	828.556	936.321	938.618	342.161	206.437	214.376	901.165	254.325	1.82352	1.26791e-09	1.48231e-07	nhr-11	IV	9070010	9073622	+	1892	protein_coding	Nuclear hormone receptor family member nhr-11 [Source:UniProtKB/Swiss-Prot;Acc:Q23294]	ESR-like
WBGene00001607	526.488	1223.54	2047.89	210.132	146.402	246.304	1265.97	200.946	2.65564	1.34293e-09	1.55911e-07	gln-6	IV	9739219	9740908	-	1506	protein_coding	GLutamiNe synthetase (Glutamate-ammonia ligase) [Source:UniProtKB/TrEMBL;Acc:O02225]	-
WBGene00014137	625.915	572.516	665.009	150.625	225.396	173.325	621.146	183.115	1.76294	1.40876e-09	1.62426e-07	clec-187	IV	12869270	12871513	-	1007	protein_coding	C-type LECtin [Source:UniProtKB/TrEMBL;Acc:Q9XUA7]	-
WBGene00001855	690.306	1116.31	1837.35	232.447	192.745	312.442	1214.66	245.878	2.30513	1.46522e-09	1.67778e-07	hil-4	V	4754313	4755469	+	971	protein_coding	Histone H1.4 [Source:UniProtKB/Swiss-Prot;Acc:O17536]	-
WBGene00013894	262.297	496.882	695.616	71.5936	95.8458	101.487	484.932	89.642	2.4372	1.75426e-09	1.99509e-07	ZC434.8	I	10348055	10349379	-	1187	protein_coding	Probable arginine kinase ZC434.8 [Source:UniProtKB/Swiss-Prot;Acc:Q27535]	-
WBGene00007836	2223.37	2737.16	3049.58	858.193	1040.61	962.411	2670.04	953.739	1.48535	1.77732e-09	2.00765e-07	C31C9.2	II	13636929	13638480	-	1135	protein_coding	-	-
WBGene00012583	994.268	449.013	493.423	103.206	154.828	134.555	645.568	130.863	2.30347	1.8013e-09	2.02108e-07	clec-4	II	12578356	12581098	-	1384	protein_coding	C-type LECtin [Source:UniProtKB/TrEMBL;Acc:Q9NAK5]	-
WBGene00021879	2923.15	3405.41	2923.44	969.767	1263.9	752.597	3084	995.422	1.63125	2.01179e-09	2.24221e-07	clec-83	IV	2839375	2841434	-	976	protein_coding	C-type LECtin [Source:UniProtKB/TrEMBL;Acc:Q9N3B9]	-
WBGene00009488	298.28	185.732	212.395	26.034	2.1065	27.3671	232.136	18.5026	3.64826	2.23442e-09	2.47384e-07	oac-20	V	15978714	15981666	+	2171	protein_coding	O-ACyltransferase homolog [Source:UniProtKB/TrEMBL;Acc:O45470]	-
WBGene00000465	989.533	1940.62	3028.25	313.338	215.916	504.012	1986.13	344.422	2.52828	2.36104e-09	2.59683e-07	cpg-1	III	4489359	4491392	+	1889	protein_coding	Chondroitin proteoglycan 1 [Source:UniProtKB/Swiss-Prot;Acc:Q17802]	-
WBGene00020915	6176.77	5263.7	6251.27	12785.5	18308.7	18975.7	5897.24	16690	-1.50084	2.62031e-09	2.86316e-07	nol-58	I	3267094	3269116	+	1789	protein_coding	NucleOLar protein [Source:UniProtKB/TrEMBL;Acc:O45012]	-
WBGene00010086	927.036	1248.43	1154.72	426.772	323.348	344.37	1110.06	364.83	1.6047	2.68751e-09	2.91752e-07	F55B11.4	IV	14429574	14430920	-	550	protein_coding	-	-
WBGene00014117	345.626	720.91	1352.28	97.6276	66.3548	165.343	806.271	109.775	2.87822	2.7829e-09	3.00159e-07	clec-91	I	9126140	9127101	-	852	protein_coding	C-type lectin domain-containing protein 91 [Source:UniProtKB/Swiss-Prot;Acc:Q94417]	-
WBGene00014836	1614.5	2343.68	1924.54	775.442	546.637	575.85	1960.9	632.643	1.63155	3.27448e-09	3.50915e-07	T09F5.12	V	15164743	15166318	-	1485	ncRNA	-	-
WBGene00000522	1002.79	1018.66	1268.8	376.564	248.567	151.66	1096.75	258.93	2.08074	3.39772e-09	3.61803e-07	clc-1	X	11047446	11049271	+	828	protein_coding	CLaudin-like in Caenorhabditis [Source:UniProtKB/TrEMBL;Acc:Q93198]	-
WBGene00017838	1582.31	1925.3	1689.88	655.499	483.442	671.635	1732.5	603.526	1.52134	3.6304e-09	3.84133e-07	F26G1.2	II	4763081	4764174	+	764	protein_coding	-	-
WBGene00016119	4200.54	4872.13	4125.47	1942.32	1498.78	1599.84	4399.38	1680.31	1.3884	3.92946e-09	4.13162e-07	C25H3.10	II	5696585	5698969	-	1052	protein_coding	-	-
WBGene00004300	19870.2	19139.1	17295.8	7442.01	8545.03	7204.4	18768.4	7730.48	1.27967	4.34294e-09	4.53783e-07	ram-2	II	11015588	11016881	-	1082	protein_coding	-	-
WBGene00000672	320.06	790.799	989.629	158.993	75.8341	47.8925	700.163	94.24	2.88969	4.54213e-09	4.71648e-07	col-97	III	12992405	12993707	-	1186	protein_coding	COLlagen [Source:UniProtKB/TrEMBL;Acc:O18286]	-
WBGene00000625	224.42	664.424	788.365	108.785	82.1536	82.1014	559.07	91.0133	2.61775	4.62296e-09	4.77078e-07	col-48	I	3010688	3011648	+	901	protein_coding	COLlagen [Source:UniProtKB/TrEMBL;Acc:Q9N3D7]	-
WBGene00018656	561.525	667.297	588.955	1545.31	1824.23	3049.16	605.925	2139.56	-1.81989	4.67111e-09	4.79089e-07	txdc-12.2	X	2074448	2075944	+	998	protein_coding	ThioredoXin Domain Containing protein homolog [Source:UniProtKB/TrEMBL;Acc:Q9N5S7]	-
WBGene00021038	153.401	312.107	364.503	28.8234	53.7158	50.1731	276.67	44.2374	2.6487	5.01951e-09	5.11684e-07	W05F2.6	I	3368785	3371444	+	1505	protein_coding	-	-
WBGene00017402	41.6646	107.227	176.223	6.50851	0	0	108.371	2.1695	5.5631	5.14832e-09	5.21634e-07	F12E12.1	II	3741884	3742509	+	519	protein_coding	-	-
WBGene00012554	1897.63	2278.57	2510.71	904.682	827.855	809.611	2228.97	847.383	1.39514	6.01428e-09	6.05704e-07	Y37D8A.16	III	12915118	12918675	-	676	protein_coding	-	-
WBGene00016659	1057.71	2161.77	3115.43	503.014	323.348	514.274	2111.64	446.879	2.2404	6.5423e-09	6.54646e-07	C45B2.2	X	6084739	6085189	+	402	protein_coding	-	-
WBGene00020148	627.809	561.984	590.81	226.868	150.615	172.185	593.534	183.223	1.6943	6.57857e-09	6.54646e-07	T01D1.3	II	174401	175642	-	795	protein_coding	-	-
WBGene00013007	0	0.957384	4.63744	14.8766	127.443	216.657	1.86494	119.659	-5.9937	6.72835e-09	6.65589e-07	Y48E1B.8	II	13585705	13589033	+	1228	protein_coding	-	-
WBGene00018269	3439.22	4038.25	3138.62	1529.5	1205.97	1059.34	3538.69	1264.94	1.48382	6.91949e-09	6.80471e-07	acs-11	II	4742128	4745280	+	1671	protein_coding	Fatty Acid CoA Synthetase family [Source:UniProtKB/TrEMBL;Acc:Q20264]	-
WBGene00012886	410.017	335.084	334.823	114.364	73.7276	98.0656	359.975	95.3856	1.91468	7.07331e-09	6.91529e-07	Y45F10D.6	IV	13796255	13797904	-	615	protein_coding	-	-
WBGene00021818	1000.9	1218.75	1193.68	430.491	298.07	419.63	1137.77	382.73	1.57165	8.07963e-09	7.85321e-07	Y53G8B.2	III	3101267	3103955	-	1175	protein_coding	-	-
WBGene00000556	69.1253	119.673	198.482	13.017	14.7455	12.5433	129.094	13.4353	3.26431	8.42025e-09	8.13698e-07	cnc-2	V	1449665	1450189	-	360	protein_coding	CaeNaCin (Caenorhabditis bacteriocin) [Source:UniProtKB/TrEMBL;Acc:O44611]	-
WBGene00008634	301.121	430.823	371.923	1620.62	1954.83	839.259	367.955	1471.57	-1.99997	8.55713e-09	8.22173e-07	F10A3.4	V	16149125	16151870	+	1788	protein_coding	-	-
WBGene00016163	82.3822	152.224	184.57	21.3851	15.7988	17.1045	139.725	18.0961	2.94555	9.30829e-09	8.89234e-07	C27D9.1	II	4753413	4755595	+	1899	protein_coding	-	-
WBGene00009146	94.6922	134.991	125.211	457.455	528.732	336.388	118.298	440.858	-1.89827	9.43933e-09	8.9663e-07	F26C11.1	II	9895538	9897351	+	1327	protein_coding	Putative acid phosphatase F26C11.1 [Source:UniProtKB/Swiss-Prot;Acc:Q09549]	-
WBGene00011103	54.9215	73.7186	28.7521	0	0	0	52.464	0	8.10259	9.68716e-09	9.14971e-07	R07E3.2	X	10336441	10337208	+	669	protein_coding	-	-
WBGene00012185	1083.28	1333.64	1119.48	489.997	387.596	348.931	1178.8	408.842	1.52684	9.94249e-09	9.33812e-07	W01F3.2	V	20660325	20662031	+	1090	protein_coding	-	-
WBGene00020033	160.977	467.203	704.891	65.0851	5.26626	15.9642	444.357	28.7718	3.93998	1.04283e-08	9.7397e-07	R12E2.7	I	4153957	4154550	-	420	protein_coding	-	-
WBGene00014138	1008.47	750.589	842.159	270.568	319.135	314.722	867.073	301.475	1.52463	1.09324e-08	1.01538e-06	clec-186	IV	12866109	12869080	+	1193	protein_coding	C-type LECtin [Source:UniProtKB/TrEMBL;Acc:O02343]	-
WBGene00011489	325.741	536.135	864.419	142.257	110.591	114.03	575.432	122.293	2.23348	1.16381e-08	1.07495e-06	T05F1.2	I	9622522	9624724	+	1958	protein_coding	-	-
WBGene00018874	331.423	622.3	609.359	155.274	97.9523	118.591	521.027	123.939	2.07035	1.22256e-08	1.12301e-06	tag-234	II	5864182	5865549	+	575	protein_coding	-	-
WBGene00000474	691.253	1460.01	2366.02	225.938	126.39	371.737	1505.76	241.355	2.64198	1.24746e-08	1.13962e-06	cey-3	I	5571787	5573019	-	1069	protein_coding	C. Elegans Y-box [Source:UniProtKB/TrEMBL;Acc:P91398]	CSD
WBGene00016877	38.8238	30.6363	51.9393	257.551	461.324	132.275	40.4665	283.716	-2.80949	1.27344e-08	1.15703e-06	C52D10.3	IV	17176477	17189805	+	2052	protein_coding	-	-
WBGene00000219	38502.8	41327.4	40161.1	14519.5	17067.9	9508.94	39997.1	13698.8	1.54582	1.34111e-08	1.21193e-06	asp-6	V	8267511	8268937	-	1275	protein_coding	Aspartic protease 6 [Source:UniProtKB/Swiss-Prot;Acc:O01530]	-
WBGene00219590	91.8514	76.5907	71.4166	6.50851	6.31951	9.12238	79.9529	7.3168	3.45671	1.38286e-08	1.24127e-06	linc-72	II	8819812	8820154	+	343	lincRNA	-	-
WBGene00202498	34.0892	99.5679	89.0388	3.71915	1.05325	0	74.232	1.5908	5.47056	1.38843e-08	1.24127e-06	Y60C6A.2	V	4785095	4785433	-	288	protein_coding	-	-
WBGene00021056	253.775	391.57	671.501	112.504	50.556	53.594	438.949	72.2181	2.59987	1.5815e-08	1.40636e-06	W06B4.1	II	4471595	4473591	+	1493	protein_coding	-	-
WBGene00013358	2148.57	2049.76	1974.62	620.168	705.678	930.483	2057.65	752.11	1.45254	1.6191e-08	1.43218e-06	abhd-3.1	V	19955453	19958912	+	1261	protein_coding	ABHydrolase Domain containing homolog [Source:UniProtKB/TrEMBL;Acc:Q9U1Z6]	-
WBGene00020242	466.832	1135.46	1126.9	231.517	153.775	224.639	909.729	203.31	2.16159	1.65676e-08	1.45777e-06	phat-5	V	4121489	4122517	-	917	protein_coding	PHAryngeal gland Toxin-related [Source:UniProtKB/TrEMBL;Acc:O16420]	-
WBGene00017048	508.497	464.331	422.007	172.94	131.656	132.275	464.945	145.624	1.67322	1.68312e-08	1.47321e-06	D2021.4	X	8546451	8549056	-	1698	protein_coding	-	-
WBGene00004984	838.973	1273.32	1999.66	432.351	282.271	281.654	1370.65	332.092	2.04448	1.6997e-08	1.47998e-06	spn-4	V	6783187	6784922	-	1542	protein_coding	PIP-1 [Source:UniProtKB/TrEMBL;Acc:G5EF02]	-
WBGene00008564	3364.41	4043.99	4242.33	1558.32	1654.66	1209.86	3883.58	1474.28	1.39721	1.76642e-08	1.53011e-06	acox-1.1	I	12938555	12942224	+	2137	protein_coding	Acyl-coenzyme A oxidase [Source:UniProtKB/TrEMBL;Acc:Q2L6T9]	-
WBGene00003643	547.321	466.246	418.297	173.87	137.976	131.134	477.288	147.66	1.69102	1.83786e-08	1.58378e-06	nhr-53	V	15700606	15702363	-	1157	protein_coding	Nuclear hormone receptor family member nhr-53 [Source:UniProtKB/Swiss-Prot;Acc:O17933]	Miscellaneous
WBGene00011558	281.236	294.874	250.422	65.0851	88.4731	68.4179	275.511	73.992	1.89725	1.98914e-08	1.70535e-06	T07A5.5	III	10318296	10318563	-	219	protein_coding	-	-
WBGene00044280	531.223	630.916	497.133	202.693	145.349	182.448	553.091	176.83	1.64445	2.04323e-08	1.74279e-06	W02A2.9	IV	13347665	13348599	+	220	protein_coding	-	-
WBGene00009186	639.172	1603.62	2397.56	307.759	137.976	330.686	1546.78	258.807	2.57935	2.06051e-08	1.74861e-06	trcs-1	IV	9587100	9588834	-	1516	protein_coding	TRansport of membrane to Cell Surface [Source:UniProtKB/TrEMBL;Acc:Q19839]	-
WBGene00001609	382.556	808.989	1087.94	202.693	144.295	135.695	759.83	160.895	2.23844	2.08985e-08	1.76455e-06	glp-1	III	9092241	9099698	+	4326	protein_coding	-	-
WBGene00004242	192.225	333.17	481.366	69.734	62.1418	25.0866	335.587	52.3208	2.67674	2.10861e-08	1.77144e-06	puf-6	II	13039790	13043476	-	1914	protein_coding	Pumilio domain-containing protein 6 [Source:UniProtKB/Swiss-Prot;Acc:O01322]	-
WBGene00001423	11838.4	8810.8	9452.95	21314.4	29594.2	31501.9	10034.1	27470.2	-1.45295	2.12208e-08	1.77384e-06	fib-1	V	15000653	15002273	-	1423	protein_coding	rRNA 2'-O-methyltransferase fibrillarin [Source:UniProtKB/Swiss-Prot;Acc:Q22053]	-
WBGene00019599	2534.91	2411.65	2446.71	931.646	1023.76	607.779	2464.42	854.395	1.5279	2.201e-08	1.82944e-06	acds-10	V	5747723	5752033	+	3135	protein_coding	ACaD (ACAD, acyl-CoA Dehydrogenase) Sequence homolog [Source:UniProtKB/TrEMBL;Acc:O01590]	-
WBGene00015046	856.017	1271.41	1328.16	184.098	147.455	409.367	1151.86	246.973	2.22304	2.21933e-08	1.82944e-06	nlp-34	V	3978836	3979134	-	253	protein_coding	Neuropeptide-Like Protein [Source:UniProtKB/TrEMBL;Acc:Q8MNX6]	-
WBGene00019022	779.317	843.455	995.194	306.83	295.964	350.071	872.655	317.621	1.45853	2.2263e-08	1.82944e-06	F58A6.1	II	5142343	5144021	+	950	protein_coding	-	-
WBGene00003485	3340.74	3372.86	3653.37	7082.18	9189.62	8775.73	3455.66	8349.18	-1.27263	2.23236e-08	1.82944e-06	mua-6	X	16262295	16265686	-	1937	protein_coding	Intermediate filament protein ifa-2 [Source:UniProtKB/Swiss-Prot;Acc:O02365]	-
WBGene00010125	339.945	200.093	150.253	48.3489	17.9053	35.3492	230.097	33.8678	2.76046	2.30096e-08	1.87646e-06	dod-22	IV	12965387	12967318	+	1168	protein_coding	Downstream Of DAF-16 (Regulated by DAF-16) [Source:UniProtKB/TrEMBL;Acc:Q9XUE0]	-
WBGene00022439	91.8514	164.67	203.12	23.2447	26.3313	12.5433	153.214	20.7064	2.88222	2.38977e-08	1.93943e-06	Y110A2AL.2	II	2867993	2870758	+	1474	protein_coding	-	-
WBGene00008477	1381.56	1455.22	1400.51	489.068	394.969	180.167	1412.43	354.735	1.99206	2.43614e-08	1.9675e-06	clec-17	I	12430028	12431500	-	1329	protein_coding	C-type LECtin [Source:UniProtKB/TrEMBL;Acc:O17741]	-
WBGene00000973	4887.06	5514.53	5448.99	1933.03	2021.19	2508.66	5283.53	2154.29	1.29444	2.46122e-08	1.9782e-06	dhs-9	III	5364512	5368045	-	1033	protein_coding	DeHydrogenases, Short chain [Source:UniProtKB/TrEMBL;Acc:Q9N538]	-
WBGene00012144	3568	4709.37	3932.55	1826.1	1342.9	1204.15	4069.97	1457.72	1.481	2.52031e-08	2.016e-06	T28H10.3	V	12512986	12514941	+	1565	protein_coding	-	-
WBGene00022793	2190.23	2222.09	2234.32	4903.69	4904.99	5068.62	2215.55	4959.1	-1.16241	2.56947e-08	2.04555e-06	ZK686.3	III	7767571	7769063	-	1267	protein_coding	Probable dolichyl-diphosphooligosaccharide--protein glycosyltransferase subunit 3 [Source:UniProtKB/Swiss-Prot;Acc:P34669]	-
WBGene00012020	538.798	1070.36	1976.48	223.149	95.8458	258.848	1195.21	192.614	2.63367	2.58948e-08	2.0517e-06	gyg-2	V	16745080	16746258	-	1070	protein_coding	GlYcoGenin like [Source:UniProtKB/TrEMBL;Acc:O45819]	-
WBGene00000699	335.21	800.373	999.832	189.676	104.272	117.451	711.805	137.133	2.37438	2.66085e-08	2.09831e-06	col-125	IV	11225505	11226519	+	945	protein_coding	COLlagen [Source:UniProtKB/TrEMBL;Acc:Q18302]	-
WBGene00010320	2084.17	2082.31	2046.97	847.035	852.08	564.447	2071.15	754.521	1.45632	2.68114e-08	2.10438e-06	F59B10.4	II	10513827	10519108	-	1293	protein_coding	-	-
WBGene00016335	1503.71	1832.43	1951.43	507.663	569.809	207.534	1762.53	428.335	2.04006	2.71116e-08	2.118e-06	gba-1	II	2176741	2181990	+	1933	protein_coding	Putative glucosylceramidase 1 [Source:UniProtKB/Swiss-Prot;Acc:O16580]	-
WBGene00001647	213.057	363.806	550.928	55.7872	63.1951	96.9253	375.93	71.9692	2.3879	2.76546e-08	2.15037e-06	gna-2	I	7699543	7700958	+	1271	protein_coding	Glucosamine phosphate N-Acetyl transferase; Phosphoglucosamine acetyltransferase [Source:UniProtKB/TrEMBL;Acc:G5EC27]	-
WBGene00011011	189.384	382.954	619.562	75.3127	42.13	79.8208	397.3	65.7545	2.59517	2.89524e-08	2.24086e-06	R04D3.3	X	13288917	13290631	-	1521	protein_coding	-	-
WBGene00004236	854.123	1100.99	1143.59	360.757	173.786	108.328	1032.9	214.291	2.26673	2.91123e-08	2.24285e-06	ptr-22	V	18919296	18931379	-	2697	protein_coding	PaTched Related family [Source:UniProtKB/TrEMBL;Acc:H1UBK6]	-
WBGene00018297	846.548	2158.9	2963.32	320.776	67.4081	371.737	1989.59	253.307	2.97359	3.28903e-08	2.52229e-06	F41F3.3	V	4647665	4648241	-	577	protein_coding	-	-
WBGene00011161	114.578	126.375	167.875	9.29786	17.9053	0	136.276	9.06771	3.89857	3.39314e-08	2.59025e-06	chil-18	II	9448273	9449726	+	1350	protein_coding	CHItinase-Like [Source:UniProtKB/TrEMBL;Acc:Q21861]	-
WBGene00010627	7135.05	5696.43	6137.19	12954.7	17785.2	20323.5	6322.89	17021.1	-1.42864	3.47667e-08	2.64195e-06	nol-56	V	10350471	10352978	-	1619	protein_coding	Nucleolar protein 56 [Source:UniProtKB/Swiss-Prot;Acc:Q21276]	-
WBGene00010127	49.2399	48.8266	32.4621	0	0	0	43.5095	0	7.83271	3.62177e-08	2.73976e-06	F55G11.7	IV	12960436	12962120	+	1129	protein_coding	-	-
WBGene00011061	1027.41	1825.73	3044.94	354.249	224.342	571.289	1966.03	383.293	2.35927	3.64182e-08	2.74252e-06	wago-1	I	7235371	7238790	+	3066	protein_coding	Argonaute protein wago-1 [Source:UniProtKB/Swiss-Prot;Acc:Q21770]	-
WBGene00019908	138.251	67.9743	113.153	312.408	486.602	1036.53	106.459	611.847	-2.52208	3.72931e-08	2.79581e-06	R05H11.2	III	6798299	6800489	+	822	protein_coding	-	-
WBGene00003473	842.76	778.353	826.392	237.096	350.733	271.391	815.835	286.406	1.51073	3.86727e-08	2.87067e-06	mtl-1	V	6691371	6691863	-	373	protein_coding	Metallothionein-1 [Source:UniProtKB/Swiss-Prot;Acc:P17511]	-
WBGene00284848	88.0637	137.863	115.008	11.1574	11.5858	0	113.645	7.58107	3.88485	3.87162e-08	2.87067e-06	M02E1.4	X	313274	314687	+	416	protein_coding	-	-
WBGene00003554	133.516	241.261	381.197	49.2787	23.1715	9.12238	251.991	27.1909	3.20166	3.88067e-08	2.87067e-06	nas-38	X	558141	563657	+	2315	protein_coding	Zinc metalloproteinase nas-38 [Source:UniProtKB/Swiss-Prot;Acc:Q20942]	-
WBGene00012879	292.599	679.743	1106.49	166.432	57.9288	91.2238	692.945	105.195	2.71762	4.33622e-08	3.19352e-06	fbxa-215	IV	13665345	13666909	-	1364	protein_coding	F-box A protein [Source:UniProtKB/TrEMBL;Acc:O62474]	-
WBGene00007445	205.482	322.638	409.95	79.0318	33.704	67.2776	312.69	60.0045	2.38003	4.40216e-08	3.22786e-06	C08F8.3	IV	11155029	11156634	+	1461	protein_coding	-	-
WBGene00000551	109.843	232.644	191.99	29.7532	31.5975	35.3492	178.159	32.2333	2.46818	4.44493e-08	3.24499e-06	clx-1	IV	7734647	7736409	+	1763	protein_coding	CoLlagen sequence X-hybridizing [Source:UniProtKB/TrEMBL;Acc:Q18756]	-
WBGene00015932	197.907	212.539	270.826	62.2957	21.065	36.4895	227.091	39.9501	2.50133	4.62853e-08	3.36434e-06	C17H12.6	IV	6821077	6822506	-	1087	protein_coding	-	-
WBGene00019543	3645.65	3492.54	3581.96	7063.59	9146.43	9815.68	3573.38	8675.23	-1.27956	4.94297e-08	3.57734e-06	cif-1	IV	4706777	4710755	-	1678	protein_coding	COP9/Signalosome and eIF3 complex-shared subunit 1 [Source:UniProtKB/Swiss-Prot;Acc:Q94261]	-
WBGene00008409	315.325	318.809	326.476	738.25	958.458	835.838	320.203	844.182	-1.39837	4.97578e-08	3.58556e-06	mpst-1	V	11825897	11827067	-	1080	protein_coding	Putative thiosulfate sulfurtransferase mpst-1 [Source:UniProtKB/Swiss-Prot;Acc:O17730]	-
WBGene00017319	622.128	497.84	493.423	1217.09	1465.07	1846.14	537.797	1509.43	-1.48863	5.09671e-08	3.65695e-06	mrps-9	III	8266062	8267841	+	1289	protein_coding	Probable 40S ribosomal protein S9, mitochondrial [Source:UniProtKB/Swiss-Prot;Acc:P34388]	-
WBGene00009983	324.794	743.887	1061.05	138.538	86.3666	176.746	709.909	133.884	2.40728	5.11874e-08	3.65706e-06	cut-2	V	13414902	13416121	+	1031	protein_coding	Cuticlin-2 [Source:UniProtKB/Swiss-Prot;Acc:P34682]	-
WBGene00012535	272.713	417.419	260.624	93.9084	62.1418	82.1014	316.919	79.3839	1.9959	5.50001e-08	3.91273e-06	Y37A1A.2	IV	13905991	13912297	-	1525	protein_coding	-	-
WBGene00017329	152.454	133.076	140.051	485.349	413.928	379.719	141.86	426.332	-1.58799	5.5918e-08	3.96118e-06	ugt-39	V	7157142	7159190	+	1853	protein_coding	UDP-GlucuronosylTransferase [Source:UniProtKB/TrEMBL;Acc:H2KZP8]	-
WBGene00007643	144.879	307.32	473.019	57.6468	28.4378	7.98208	308.406	31.3555	3.28894	5.81793e-08	4.10398e-06	2023-03-03	I	9416704	9418884	-	1503	protein_coding	MARCH (Membrane-Associated Ring finger (C3HC4)) homolog [Source:UniProtKB/TrEMBL;Acc:Q93227]	-
WBGene00000683	191.278	500.712	725.295	95.768	36.8638	80.9611	472.428	71.1976	2.72914	5.85469e-08	4.11255e-06	col-109	IV	1817311	1820253	-	1226	protein_coding	COLlagen [Source:UniProtKB/TrEMBL;Acc:Q9N527]	-
WBGene00019606	517.019	1159.39	1922.68	237.096	111.645	279.373	1199.7	209.371	2.51875	5.9503e-08	4.16223e-06	clec-88	II	6365722	6367002	+	1212	protein_coding	C-type lectin domain-containing protein 88 [Source:UniProtKB/Swiss-Prot;Acc:Q86NG3]	-
WBGene00013030	160.03	247.962	340.388	55.7872	58.9821	38.7701	249.46	51.1798	2.28307	6.0135e-08	4.1889e-06	Y49E10.4	III	12378724	12380647	-	1476	protein_coding	-	-
WBGene00010491	517.019	836.754	1032.29	202.693	188.532	274.812	795.356	222.012	1.8418	6.34674e-08	4.40269e-06	K02B7.3	II	14694192	14695299	-	651	protein_coding	-	-
WBGene00003097	6676.74	4039.2	3864.84	1803.79	1638.86	1575.89	4860.26	1672.85	1.53865	6.52714e-08	4.50912e-06	lys-8	II	5586165	5587651	+	983	protein_coding	LYSozyme [Source:UniProtKB/TrEMBL;Acc:Q09975]	-
WBGene00011112	53.0276	126.375	168.803	493.717	891.05	450.418	116.068	611.728	-2.39769	6.58807e-08	4.53248e-06	R07E5.4	III	4394796	4396617	+	852	protein_coding	-	-
WBGene00009824	617.393	995.679	1532.21	158.064	344.413	164.203	1048.43	222.227	2.23838	6.91115e-08	4.71595e-06	gpdh-1	I	14075836	14078211	+	1309	protein_coding	Glycerol-3-phosphate dehydrogenase [NAD(+)] [Source:UniProtKB/TrEMBL;Acc:Q9XTS4]	-
WBGene00045276	2469.57	1474.37	1424.62	389.581	457.111	692.161	1789.52	512.951	1.80337	6.91116e-08	4.71595e-06	F18E3.13	V	7416116	7416628	+	513	protein_coding	-	-
WBGene00020662	12416	15272.2	14644.1	4381.15	6283.7	3001.26	14110.8	4555.37	1.63112	7.20244e-08	4.89473e-06	T21H3.1	V	1176724	1178864	+	958	protein_coding	-	-
WBGene00017356	412.858	395.4	454.469	909.331	1320.78	1167.66	420.909	1132.59	-1.42777	7.42943e-08	5.02855e-06	F10E9.4	III	8308538	8309806	+	932	protein_coding	-	-
WBGene00007950	511.338	259.451	217.032	85.5404	40.0235	57.0149	329.274	60.8596	2.43283	7.725e-08	5.20752e-06	C35A5.6	V	10509055	10510451	+	802	protein_coding	-	-
WBGene00010231	1062.45	1052.16	882.041	2054.83	2791.12	3263.53	998.884	2703.16	-1.43612	7.76694e-08	5.21477e-06	F58B3.4	IV	11628757	11631850	-	1883	protein_coding	-	-
WBGene00017435	1028.36	1011.95	1123.19	2259.38	2564.67	2431.11	1054.5	2418.39	-1.19742	7.88077e-08	5.27003e-06	F13H8.2	II	6270370	6274005	+	3070	protein_coding	-	-
WBGene00020097	4920.2	3280	2801.94	11168.6	11473.1	8919.41	3667.38	10520.4	-1.52039	8.18008e-08	5.44839e-06	larp-1	III	5008933	5017860	-	4713	protein_coding	La-related protein 1 [Source:UniProtKB/Swiss-Prot;Acc:D5MCN2]	-
WBGene00019168	2795.31	2335.06	2053.46	4894.4	7996.28	7031.08	2394.61	6640.58	-1.47148	8.2732e-08	5.48854e-06	H06I04.3	III	3070523	3085268	+	2759	protein_coding	rRNA methyltransferase [Source:UniProtKB/TrEMBL;Acc:Q5CCJ3]	-
WBGene00012113	6270.52	5527.93	5689.21	2237.07	2269.76	2879.25	5829.22	2462.02	1.24359	8.52848e-08	5.63554e-06	T28B8.1	I	8133891	8135051	+	1082	protein_coding	-	-
WBGene00019380	877.796	733.356	811.552	2077.14	2937.52	1764.04	807.568	2259.57	-1.48441	8.67094e-08	5.70711e-06	K04C2.2	III	6889749	6895089	+	3153	protein_coding	-	-
WBGene00000991	8782.7	9743.3	10196.8	3730.3	4085.56	2234.98	9574.26	3350.28	1.51477	8.77392e-08	5.75225e-06	dhs-28	X	6818438	6820080	+	1409	protein_coding	DeHydrogenases, Short chain [Source:UniProtKB/TrEMBL;Acc:Q21481]	-
WBGene00001073	2224.32	2089.01	2429.09	5146.37	4917.63	4912.4	2247.47	4992.13	-1.15135	8.92774e-08	5.83023e-06	dpy-11	V	6511588	6515240	-	1389	protein_coding	DumPY: shorter than wild-type; Thioredoxin-like protein DPY-11 [Source:UniProtKB/TrEMBL;Acc:G5EC91]	-
WBGene00010528	110.79	158.926	126.138	11.1574	24.2248	26.2268	131.951	20.5364	2.69305	9.14106e-08	5.94631e-06	K03D3.2	IV	16328135	16328614	-	435	protein_coding	-	-
WBGene00001479	1392.92	1613.19	1631.45	647.131	325.455	519.976	1545.85	497.521	1.63511	9.44441e-08	6.09843e-06	fmo-4	V	13603276	13606701	-	2022	protein_coding	Dimethylaniline monooxygenase [N-oxide-forming] [Source:UniProtKB/TrEMBL;Acc:G5EDG8]	-
WBGene00015410	1076.65	808.032	743.845	357.968	281.218	265.689	876.176	301.625	1.53757	9.44786e-08	6.09843e-06	tbc-6	II	6848060	6851531	+	1412	protein_coding	Growth hormone-regulated TBC protein 6 [Source:UniProtKB/Swiss-Prot;Acc:Q09445]	-
WBGene00016204	774.582	809.947	555.565	223.149	252.78	126.573	713.365	200.834	1.82733	9.87403e-08	6.349e-06	gsto-1	III	7945544	7947018	-	804	protein_coding	Glutathione transferase omega-1 [Source:UniProtKB/Swiss-Prot;Acc:P34345]	-
WBGene00022077	1290.65	1302.04	1307.76	572.748	541.371	567.868	1300.15	560.663	1.21344	1.03675e-07	6.64076e-06	vamp-7	IV	2608051	2610200	+	1005	protein_coding	VAMP (Vesicle Associated Membrane Protein) homolog [Source:UniProtKB/TrEMBL;Acc:Q95XH1]	-
WBGene00001599	213.057	313.065	431.282	89.2595	78.9938	63.8567	319.135	77.37	2.04252	1.06936e-07	6.82351e-06	glh-2	I	6513928	6517507	+	3218	protein_coding	ATP-dependent RNA helicase glh-2 [Source:UniProtKB/Swiss-Prot;Acc:Q966L9]	-
WBGene00019918	259.457	277.641	262.479	74.3829	53.7158	90.0835	266.526	72.7274	1.87491	1.12223e-07	7.1336e-06	fbxc-36	II	940983	943162	+	1106	protein_coding	F-box C protein [Source:UniProtKB/TrEMBL;Acc:A0A0S4XRR6]	-
WBGene00014253	1939.3	1115.35	1086.09	355.178	488.708	209.815	1380.25	351.234	1.97392	1.1345e-07	7.1676e-06	ZK1320.3	II	9659246	9660442	-	693	protein_coding	-	-
WBGene00016218	486.718	326.468	306.071	97.6276	111.645	116.31	373.086	108.528	1.78239	1.13615e-07	7.1676e-06	pals-23	III	124778	126527	+	1162	protein_coding	Protein containing ALS2cr12 (ALS2CR12) signature [Source:UniProtKB/TrEMBL;Acc:Q8MNX2]	-
WBGene00012615	3539.59	2513.13	2400.34	573.678	1203.87	750.316	2817.69	842.62	1.74177	1.16105e-07	7.29715e-06	dct-16	V	20497922	20499103	-	517	protein_coding	DAF-16/FOXO Controlled, germline Tumor affecting [Source:UniProtKB/TrEMBL;Acc:D4YWC3]	-
WBGene00018489	87.1168	193.392	287.521	36.2617	22.1183	23.9463	189.343	27.4421	2.78253	1.20903e-07	7.54567e-06	F46E10.2	V	6520435	6521099	+	571	protein_coding	5H1 [Source:UniProtKB/TrEMBL;Acc:G5EDS0]	-
WBGene00018707	295.44	318.809	412.732	90.1893	116.911	60.4358	342.327	89.1786	1.93913	1.20962e-07	7.54567e-06	oac-31	V	1538364	1541824	-	2233	protein_coding	O-ACyltransferase homolog [Source:UniProtKB/TrEMBL;Acc:Q9UAQ8]	-
WBGene00008967	249.987	500.712	505.481	129.24	49.5028	49.0328	418.727	75.9253	2.45878	1.29793e-07	8.06648e-06	F20B10.3	IV	12168244	12169216	+	877	protein_coding	-	-
WBGene00007332	328.582	729.527	1277.15	123.662	76.8873	198.412	778.42	132.987	2.55039	1.31479e-07	8.14096e-06	C05C10.5	II	9939040	9940432	+	1248	protein_coding	-	-
WBGene00020311	480.089	462.416	471.164	128.311	166.414	187.009	471.223	160.578	1.55496	1.33604e-07	8.24205e-06	T07D3.9	II	898043	901164	-	1651	protein_coding	-	-
WBGene00004244	227.261	323.596	376.56	101.347	47.3963	44.4716	309.139	64.4049	2.25782	1.41102e-07	8.67258e-06	puf-8	II	7296110	7298247	-	1820	protein_coding	PUF (Pumilio/FBF) domain-containing [Source:UniProtKB/TrEMBL;Acc:Q09487]	-
WBGene00017390	343.733	250.835	240.219	58.5765	91.6328	42.191	278.262	64.1335	2.11614	1.45698e-07	8.92227e-06	F12A10.1	II	5496540	5497062	+	378	protein_coding	-	-
WBGene00015993	2845.5	1940.62	1888.36	946.523	507.667	659.092	2224.83	704.427	1.65871	1.46368e-07	8.93061e-06	C18H7.1	IV	615544	620925	+	1531	protein_coding	-	-
WBGene00018060	280.289	190.519	210.54	539.276	734.116	795.928	227.116	689.773	-1.60226	1.54994e-07	9.42249e-06	arrd-18	V	3310123	3312117	-	1507	protein_coding	ARRestin Domain protein [Source:UniProtKB/TrEMBL;Acc:Q9GYT5]	-
WBGene00007957	1020.78	981.319	974.79	452.806	318.082	263.409	992.297	344.766	1.52382	1.56099e-07	9.4553e-06	C35C5.8	X	11534004	11536574	+	1680	protein_coding	-	-
WBGene00013284	4741.24	5565.27	6097.3	2128.28	2428.8	1411.69	5467.94	1989.59	1.45838	1.60185e-07	9.66775e-06	daf-22	II	12423514	12425694	-	1337	protein_coding	Non-specific lipid-transfer protein-like 2 [Source:UniProtKB/Swiss-Prot;Acc:G5EDP2]	-
WBGene00012107	674.208	662.51	715.093	227.798	304.39	205.254	683.937	245.814	1.47614	1.65167e-07	9.93258e-06	T27F6.8	I	12497438	12499817	-	1509	protein_coding	-	-
WBGene00001150	79.5414	123.503	177.15	15.8064	24.2248	17.1045	126.731	19.0452	2.73592	1.66925e-07	1.00024e-05	ech-1.1	V	15357696	15360738	-	2364	protein_coding	Enoyl-CoA Hydratase [Source:UniProtKB/TrEMBL;Acc:O17612]	-
WBGene00007878	364.565	274.769	238.364	99.4871	63.1951	64.997	292.566	75.8931	1.94358	1.68486e-07	1.00598e-05	C33A11.2	X	15365994	15369999	+	1062	protein_coding	-	-
WBGene00021730	42.6115	67.9743	100.169	6.50851	2.1065	0	70.2515	2.87167	4.55826	1.69288e-07	1.00718e-05	Y49F6C.8	II	3369175	3370111	-	618	protein_coding	-	-
WBGene00011831	1798.2	3566.26	4424.12	1055.31	911.062	936.184	3262.86	967.518	1.7537	1.74585e-07	1.035e-05	T19B10.2	V	11221302	11222834	+	1231	protein_coding	-	-
WBGene00017041	309.643	369.55	349.663	124.591	113.751	93.5044	342.952	110.616	1.63073	1.79706e-07	1.0616e-05	D2007.1	III	8155470	8155989	+	386	protein_coding	-	-
WBGene00020382	1970.54	1289.6	1444.1	3362.11	4590.07	4750.48	1568.08	4234.22	-1.43302	1.94886e-07	1.14722e-05	T09B4.8	I	6164719	6166539	-	1461	protein_coding	-	-
WBGene00007153	2424.12	1423.63	1396.8	640.623	334.934	196.131	1748.18	390.563	2.16102	1.98792e-07	1.16494e-05	clec-41	V	13134965	13138101	-	2042	protein_coding	C-type LECtin [Source:UniProtKB/TrEMBL;Acc:P90732]	-
WBGene00016695	28.4077	89.0367	91.8213	4.64893	0	0	69.7552	1.54964	5.4033	1.99289e-07	1.16494e-05	C45H4.14	V	2158674	2159427	-	678	protein_coding	-	-
WBGene00021296	1746.12	2239.32	2606.24	910.261	834.175	890.573	2197.23	878.336	1.32282	2.00431e-07	1.16753e-05	Y25C1A.13	II	3109368	3111247	-	1044	protein_coding	-	-
WBGene00002034	172.34	401.144	507.336	86.4701	66.3548	30.788	360.273	61.2043	2.55337	2.03304e-07	1.17938e-05	htp-3	I	4827072	4829794	+	2345	protein_coding	Him-Three Paralog [Source:UniProtKB/TrEMBL;Acc:O01820]	-
WBGene00012672	81.4353	184.775	331.113	38.1212	11.5858	17.1045	199.108	22.2705	3.15232	2.03876e-07	1.17938e-05	Y39B6A.10	V	19131531	19133603	-	881	protein_coding	-	-
WBGene00012738	1052.98	974.617	905.228	1950.69	2603.64	3314.85	977.607	2623.06	-1.42375	2.08646e-07	1.20281e-05	eif-3.J	I	13435489	13437965	+	911	protein_coding	Eukaryotic Initiation Factor [Source:UniProtKB/TrEMBL;Acc:Q9XWP7]	-
WBGene00010492	178.968	417.419	558.348	85.5404	32.6508	78.6805	384.912	65.6239	2.55146	2.14607e-07	1.232e-05	meg-1	X	13927036	13929634	-	2365	protein_coding	-	-
WBGene00007440	285.97	512.2	458.179	145.976	99.0056	99.2059	418.783	114.729	1.86599	2.15184e-07	1.232e-05	C08E8.4	V	18371846	18373528	+	938	protein_coding	-	-
WBGene00016824	37.8769	80.4202	195.7	7.43829	9.47926	7.98208	104.666	8.29988	3.65822	2.30734e-07	1.30876e-05	C50E3.13	V	7622335	7624252	-	1446	protein_coding	-	-
WBGene00019678	944.081	896.111	989.629	2204.52	2478.3	1908.86	943.274	2197.23	-1.21998	2.308e-07	1.30876e-05	K12H4.3	III	8046034	8047612	+	1186	protein_coding	Ribosome biogenesis protein BRX1 homolog [Source:UniProtKB/Swiss-Prot;Acc:P34524]	-
WBGene00017691	1051.08	650.064	668.719	1632.7	2973.33	3526.94	789.955	2710.99	-1.77883	2.30939e-07	1.30876e-05	ilys-5	X	6533493	6536840	-	1285	protein_coding	Invertebrate LYSozyme [Source:UniProtKB/TrEMBL;Acc:Q19698]	-
WBGene00022532	117.418	181.903	300.506	43.7	37.917	27.3671	199.942	36.328	2.45708	2.32363e-07	1.31238e-05	ZC155.4	III	5211781	5215512	-	1927	protein_coding	-	-
WBGene00012538	1752.75	2227.83	1856.83	870.28	754.128	534.8	1945.8	719.736	1.43424	2.35079e-07	1.32309e-05	Y37A1B.5	IV	14051200	14056676	+	1954	protein_coding	-	-
WBGene00000831	3539.59	3654.33	3593.09	1499.75	1383.97	734.352	3595.67	1206.02	1.57562	2.35841e-07	1.32309e-05	ctl-2	II	14299553	14302083	-	1670	protein_coding	Peroxisomal catalase 1 [Source:UniProtKB/Swiss-Prot;Acc:Q27487]	-
WBGene00000603	387.291	978.446	1261.38	231.517	48.4495	122.012	875.707	133.993	2.70657	2.53061e-07	1.41494e-05	col-14	IV	7753408	7754651	+	1077	protein_coding	Cuticle collagen 14 [Source:UniProtKB/Swiss-Prot;Acc:P18834]	-
WBGene00020104	1080.44	1191.94	1199.24	516.961	504.507	477.785	1157.21	499.751	1.21118	2.54134e-07	1.4162e-05	R148.5	III	3166285	3171198	+	2132	protein_coding	-	-
WBGene00003992	541.639	690.274	1191.82	214.781	262.26	128.854	807.912	201.965	1.99931	2.57956e-07	1.43273e-05	pgl-1	IV	6974401	6977318	-	2532	protein_coding	Guanyl-specific ribonuclease pgl-1 [Source:UniProtKB/Swiss-Prot;Acc:Q9TZQ3]	-
WBGene00021079	532.17	446.141	476.729	198.045	154.828	173.325	485.013	175.399	1.46662	2.64393e-07	1.46362e-05	W08A12.2	V	3684664	3685830	-	446	protein_coding	-	-
WBGene00017263	109.843	313.065	549.073	68.8042	25.278	30.788	323.993	41.6234	2.95579	2.69386e-07	1.48633e-05	F08F3.6	V	5418044	5420067	-	1357	protein_coding	-	-
WBGene00021596	173.287	294.874	388.617	79.0318	65.3016	50.1731	285.593	64.8355	2.13655	2.71097e-07	1.49082e-05	spsb-2	II	15230343	15232803	+	1032	protein_coding	SPSB (SPry and Socs Box) family [Source:UniProtKB/TrEMBL;Acc:Q965N7]	-
WBGene00001065	88.0637	175.201	156.745	32.5425	14.7455	15.9642	140.003	21.0841	2.7222	2.71983e-07	1.49082e-05	dpy-3	X	2144605	2145647	-	961	protein_coding	DumPY: shorter than wild-type [Source:UniProtKB/TrEMBL;Acc:Q19079]	-
WBGene00011694	378.769	220.198	407.167	748.478	1296.55	1776.58	335.378	1273.87	-1.92493	2.76097e-07	1.50843e-05	T10G3.3	V	13487026	13489626	-	998	protein_coding	-	-
WBGene00012947	201.694	459.544	404.385	106.925	35.8105	43.3313	355.208	62.0224	2.51281	2.81622e-07	1.5336e-05	Y47H9C.1	I	11830985	11833166	-	1174	protein_coding	-	-
WBGene00000031	205.482	295.832	325.548	86.4701	77.9406	58.1552	275.621	74.1886	1.89101	2.87785e-07	1.56207e-05	abu-8	V	5163269	5194608	-	1617	protein_coding	Activated in Blocked Unfolded protein response [Source:UniProtKB/TrEMBL;Acc:O16511]	-
WBGene00007958	688.412	517.945	505.481	205.483	177.999	224.639	570.613	202.707	1.49339	2.94175e-07	1.59159e-05	C35C5.9	X	11536568	11537124	+	449	protein_coding	-	-
WBGene00008629	701.669	1115.35	1141.74	357.968	311.762	168.764	986.253	279.498	1.81784	2.9544e-07	1.59328e-05	cpt-5	V	13873153	13875891	+	2322	protein_coding	Carnitine Palmitoyl Transferase [Source:UniProtKB/TrEMBL;Acc:G5EG54]	-
WBGene00012481	138.251	307.32	518.466	55.7872	41.0768	71.8388	321.345	56.2342	2.51589	3.0644e-07	1.64729e-05	Y18D10A.11	I	12861951	12863544	-	1143	protein_coding	-	-
WBGene00022765	1030.25	989.935	809.697	1872.59	3170.29	2604.44	943.294	2549.11	-1.43412	3.08755e-07	1.65441e-05	ZK546.14	II	4944042	4945838	-	1608	protein_coding	-	-
WBGene00016586	151.507	239.346	406.24	49.2787	40.0235	68.4179	265.698	52.5734	2.33947	3.12183e-07	1.66744e-05	C42C1.8	IV	12291046	12293317	+	1826	protein_coding	-	-
WBGene00008980	875.903	821.435	819.899	375.634	338.094	343.23	839.079	352.319	1.2516	3.13224e-07	1.66767e-05	emre-1	X	14979374	14980435	+	1013	protein_coding	Essential MCU regulator, mitochondrial [Source:UniProtKB/Swiss-Prot;Acc:Q9U3I4]	-
WBGene00017985	89.0106	168.5	196.627	20.4553	26.3313	33.0686	151.379	26.6184	2.5125	3.18527e-07	1.69052e-05	neg-1	V	4373760	4374874	-	725	protein_coding	Negative Effect on Gut development [Source:UniProtKB/TrEMBL;Acc:I2HA84]	-
WBGene00022665	256.616	200.093	253.204	476.051	910.009	1100.39	236.638	828.816	-1.80778	3.22313e-07	1.7052e-05	ZK154.1	X	7779577	7780606	+	765	protein_coding	-	-
WBGene00015545	262.297	469.118	501.771	137.608	100.059	74.1194	411.062	103.929	1.98112	3.26568e-07	1.72226e-05	C06G1.1	X	16633363	16637633	+	1992	protein_coding	-	-
WBGene00001076	1372.09	2757.27	3599.58	836.808	185.372	371.737	2576.31	464.639	2.47042	3.44638e-07	1.81184e-05	dpy-17	III	5107330	5108497	+	1116	protein_coding	DumPY: shorter than wild-type [Source:UniProtKB/TrEMBL;Acc:Q20778]	-
WBGene00009674	900.523	726.654	542.58	1753.58	1907.44	2032.01	723.252	1897.68	-1.39165	3.50843e-07	1.83868e-05	nucb-1	X	10197706	10200407	+	1665	protein_coding	NUCleoBindin homolog [Source:UniProtKB/TrEMBL;Acc:Q8MQ51]	-
WBGene00021600	129.728	201.051	194.772	39.9808	46.343	23.9463	175.184	36.7567	2.24931	3.63509e-07	1.89911e-05	Y46H3A.4	V	1809560	1811135	-	357	protein_coding	-	-
WBGene00000033	164.764	305.405	289.376	69.734	50.556	67.2776	253.182	62.5225	2.01723	3.70108e-07	1.92756e-05	abu-10	X	3798179	3799741	+	1271	protein_coding	Activated in Blocked Unfolded protein response [Source:UniProtKB/TrEMBL;Acc:Q20002]	-
WBGene00002033	74.8068	107.227	164.165	17.6659	6.31951	19.3851	115.4	14.4568	2.99708	3.79397e-07	1.9698e-05	htp-2	IV	6419500	6420898	+	1259	protein_coding	Him-Three Paralog [Source:UniProtKB/TrEMBL;Acc:Q95XC8]	-
WBGene00018803	2700.62	2740.03	2299.24	1276.6	788.885	748.035	2579.97	937.839	1.4594	3.91492e-07	2.02631e-05	fbxa-24	II	3816686	3818238	+	1506	protein_coding	F-box A protein [Source:UniProtKB/TrEMBL;Acc:Q9TZ85]	-
WBGene00006619	78.5945	229.772	472.091	43.7	28.4378	29.6477	260.153	33.9285	2.93633	3.95472e-07	2.04059e-05	try-1	II	4948154	4949527	-	1054	protein_coding	TRYpsin-like protease [Source:UniProtKB/TrEMBL;Acc:Q23528]	-
WBGene00004078	1133.47	2156.03	3692.33	517.891	312.816	725.229	2327.27	518.645	2.16608	4.06696e-07	2.09205e-05	pos-1	V	8414085	8415254	+	1118	protein_coding	Cytoplasmic zinc-finger protein; POsterior Segregation [Source:UniProtKB/TrEMBL;Acc:G5EF15]	-
WBGene00011059	7177.67	5038.71	5985.08	12275	17501.9	30611.3	6067.15	20129.4	-1.73019	4.42101e-07	2.26719e-05	R06C1.4	I	11930704	11931757	+	480	protein_coding	-	-
WBGene00007068	942.187	992.807	934.908	404.457	354.946	445.856	956.634	401.753	1.25188	4.47538e-07	2.28805e-05	cTel55X.1	X	17714968	17718720	+	775	protein_coding	-	-
WBGene00022159	517.966	383.911	459.106	983.714	1167	1254.33	453.661	1135.01	-1.32276	4.49499e-07	2.28824e-05	mppa-1	I	1740647	1751055	-	1662	protein_coding	Mitochondrial Processing Peptidase Alpha [Source:UniProtKB/TrEMBL;Acc:W6RR41]	-
WBGene00000788	3494.14	4841.49	3660.79	1889.33	1518.79	1575.89	3998.81	1661.34	1.26708	4.50312e-07	2.28824e-05	cpz-1	I	2686639	2689493	-	1059	protein_coding	CathePsin Z [Source:UniProtKB/TrEMBL;Acc:A0A078BPL2]	-
WBGene00009982	1077.6	1817.11	2830.69	4475.99	9853.16	7795.08	1908.47	7374.74	-1.95012	4.62765e-07	2.3444e-05	F53F1.4	V	13411077	13411717	+	531	protein_coding	-	-
WBGene00077732	184.65	375.294	583.39	100.417	53.7158	77.5402	381.111	77.2243	2.3017	4.95565e-07	2.50298e-05	szy-4	II	6198696	6201628	+	2535	protein_coding	Suppressor of ZYg-1 [Source:UniProtKB/TrEMBL;Acc:Q18320]	-
WBGene00021430	983.852	777.396	830.101	372.844	260.153	350.071	863.783	327.69	1.39805	5.0369e-07	2.53635e-05	Y38F2AR.12	IV	2399515	2412410	-	4069	protein_coding	-	-
WBGene00020760	428.956	555.283	706.746	215.71	87.4198	135.695	563.661	146.275	1.94425	5.21068e-07	2.61598e-05	T24C4.4	III	872622	873531	-	567	protein_coding	-	-
WBGene00010124	2464.84	454.757	495.278	140.398	128.497	229.2	1138.29	166.031	2.778	5.29051e-07	2.6481e-05	F55G11.4	IV	12973624	12975591	+	1089	protein_coding	-	-
WBGene00002272	6520.5	6333.09	6541.57	3005.07	3260.87	2387.78	6465.06	2884.57	1.16422	5.36267e-07	2.67621e-05	lec-9	X	17600412	17601503	+	614	protein_coding	Galectin [Source:UniProtKB/TrEMBL;Acc:G5EC10]	-
WBGene00012594	345.626	144.565	272.681	715.006	1011.12	901.976	254.291	876.034	-1.78423	5.5874e-07	2.78006e-05	nspe-5	II	12628936	12629380	+	402	protein_coding	Nematode Specific Peptide family, group E [Source:UniProtKB/TrEMBL;Acc:Q9NAJ5]	-
WBGene00017881	282.183	200.093	207.757	586.695	834.175	575.85	230.011	665.573	-1.53288	5.61113e-07	2.78358e-05	asp-13	V	8641491	8643225	-	1334	protein_coding	ASpartyl Protease [Source:UniProtKB/TrEMBL;Acc:Q22972]	-
WBGene00010638	494.293	464.331	549.073	1003.24	1313.4	1562.21	502.566	1292.95	-1.36292	5.63826e-07	2.78877e-05	K07F5.14	IV	9862221	9864076	+	1356	protein_coding	-	-
WBGene00016360	135.41	48.8266	42.6644	162.713	464.484	1386.6	75.6336	671.266	-3.14941	5.71885e-07	2.82028e-05	C33G8.2	V	7009761	7012244	+	1395	protein_coding	-	-
WBGene00077521	387.291	361.891	320.911	884.227	782.566	1298.8	356.698	988.531	-1.47031	5.79655e-07	2.8502e-05	maf-1	I	10382746	10384222	-	899	protein_coding	MAF (MusculoAponeurotic Fibrosarcoma) transcription factor homolog [Source:UniProtKB/TrEMBL;Acc:B0M0M9]	TF_bZIP
WBGene00001774	499.975	536.135	357.083	957.68	1559.86	1472.12	464.397	1329.89	-1.51773	5.84916e-07	2.86763e-05	gst-26	II	15163808	15164646	-	790	protein_coding	Glutathione S-Transferase [Source:UniProtKB/TrEMBL;Acc:Q9NAB4]	-
WBGene00019322	18756.6	17040.5	18513.6	37601.5	42590.3	34796.2	18103.6	38329.3	-1.08218	5.97286e-07	2.91972e-05	ahcy-1	I	6836375	6838140	+	1630	protein_coding	Adenosylhomocysteinase [Source:UniProtKB/Swiss-Prot;Acc:P27604]	-
WBGene00021518	2552.9	3567.21	3704.39	1161.3	1084.85	403.665	3274.83	883.272	1.89004	6.25416e-07	3.04831e-05	hpo-6	IV	1562184	1564076	+	1483	protein_coding	-	-
WBGene00000503	865.486	1874.56	1944.01	560.661	225.396	384.28	1561.35	390.112	2.00026	6.30356e-07	3.06346e-05	cht-1	X	3397613	3400017	-	2041	protein_coding	Probable endochitinase [Source:UniProtKB/Swiss-Prot;Acc:Q11174]	-
WBGene00044900	202.641	224.985	245.784	77.1723	49.5028	63.8567	224.47	63.5106	1.81954	6.52289e-07	3.15852e-05	cnc-11	V	1442588	1442876	+	238	protein_coding	CaeNaCin (Caenorhabditis bacteriocin) [Source:UniProtKB/TrEMBL;Acc:A4V4W3]	-
WBGene00015905	33.1423	38.2954	122.428	0	4.213	0	64.622	1.40433	5.53784	6.54292e-07	3.15852e-05	C17E7.12	V	3890968	3892026	-	391	protein_coding	-	-
WBGene00001591	843.707	747.717	588.955	284.515	129.55	80.9611	726.793	165.009	2.13611	6.55585e-07	3.15852e-05	glc-1	V	16219541	16221948	+	1673	protein_coding	Glutamate-gated chloride channel alpha [Source:UniProtKB/Swiss-Prot;Acc:G5EBR3]	-
WBGene00018724	616.446	941.108	749.41	233.376	337.04	226.919	768.988	265.779	1.53277	6.7643e-07	3.24958e-05	F53A9.1	X	8711590	8711911	+	322	protein_coding	-	-
WBGene00021121	383.503	514.115	466.526	117.153	109.538	193.851	454.715	140.181	1.69977	6.8051e-07	3.25982e-05	W09G12.7	IV	1229080	1230789	+	1365	protein_coding	-	-
WBGene00011906	78.5945	112.014	129.848	24.1744	13.6923	13.6836	106.819	17.1834	2.62782	7.19944e-07	3.43886e-05	hsp-12.1	I	10581538	10582609	-	492	protein_coding	Heat Shock Protein [Source:UniProtKB/TrEMBL;Acc:O01263]	-
WBGene00013602	471.567	179.031	253.204	62.2957	53.7158	83.2417	301.267	66.4177	2.18288	7.25888e-07	3.45435e-05	Y87G2A.16	I	13560447	13563465	+	1167	protein_coding	-	-
WBGene00014058	7534.66	7792.15	7757.51	3898.59	3609.49	3800.61	7694.77	3769.57	1.02947	7.27318e-07	3.45435e-05	ZK673.2	II	10448266	10450222	+	1029	protein_coding	Probable adenylate kinase isoenzyme ZK673.2 [Source:UniProtKB/Swiss-Prot;Acc:Q09629]	-
WBGene00019717	550.161	671.126	584.317	212.921	183.266	74.1194	601.868	156.769	1.93836	7.39468e-07	3.5021e-05	trx-3	IV	4487028	4489000	+	709	protein_coding	ThioRedoXin [see also xtr] [Source:UniProtKB/TrEMBL;Acc:Q94282]	-
WBGene00019515	149.614	198.178	192.917	52.9978	49.5028	41.0507	180.237	47.8504	1.91108	7.63289e-07	3.60471e-05	ugt-19	IV	6076692	6079945	-	1678	protein_coding	UDP-GlucuronosylTransferase [Source:UniProtKB/TrEMBL;Acc:Q9TYY5]	-
WBGene00012118	1641.96	1236.94	1066.61	200.834	484.495	450.418	1315.17	378.582	1.79754	7.85356e-07	3.69847e-05	grsp-2	IV	8816335	8818525	+	1094	protein_coding	Glycine Rich Secreted Protein [Source:UniProtKB/TrEMBL;Acc:X5LX98]	-
WBGene00012315	249.04	484.436	754.975	114.364	81.1003	143.678	496.151	113.047	2.1346	7.90902e-07	3.71034e-05	immt-2	V	16789267	16792771	+	2163	protein_coding	MICOS complex subunit MIC60-2 [Source:UniProtKB/Swiss-Prot;Acc:Q9XXN2]	-
WBGene00044737	1409.97	1993.27	1736.26	607.151	580.341	824.435	1713.17	670.642	1.35346	7.92314e-07	3.71034e-05	ttr-45	IV	13254225	13255538	+	679	protein_coding	TransThyretin-Related family domain [Source:UniProtKB/TrEMBL;Acc:Q2EEM8]	-
WBGene00018950	202.641	334.127	465.599	67.8744	68.4613	108.328	334.122	81.5547	2.03691	7.96848e-07	3.72115e-05	F56C9.6	III	7308998	7310773	-	1232	protein_coding	-	-
WBGene00007624	719.66	1037.8	1545.19	398.878	344.413	328.406	1100.89	357.232	1.62341	8.10756e-07	3.77555e-05	hrde-1	III	4172337	4176159	-	3537	protein_coding	Heritable RNAi Deficient [Source:RefSeq peptide;Acc:NP_497834]	-
WBGene00015920	2639.07	2435.58	3065.35	5473.65	5986.68	6105.15	2713.33	5855.16	-1.1096	8.13644e-07	3.77847e-05	eif-3.L	II	5619590	5622483	-	1958	protein_coding	Eukaryotic translation initiation factor 3 subunit L [Source:UniProtKB/Swiss-Prot;Acc:Q95QW0]	-
WBGene00021073	2207.27	2067.95	2603.46	4597.79	6300.55	5009.33	2292.89	5302.56	-1.20948	8.68963e-07	4.02419e-05	nol-2	II	471247	475940	-	2224	protein_coding	NucleOLar protein [Source:UniProtKB/TrEMBL;Acc:A0A0M7RDQ9]	-
WBGene00009165	662.845	845.37	884.823	317.057	235.928	117.451	797.679	223.479	1.83373	9.07176e-07	4.18955e-05	gpx-1	I	9780287	9781418	+	632	protein_coding	Glutathione peroxidase 1 [Source:UniProtKB/Swiss-Prot;Acc:O02621]	-
WBGene00017372	1155.24	737.186	635.329	2602.47	2585.73	1914.56	842.586	2367.59	-1.49064	9.1672e-07	4.22196e-05	F10G7.9	II	4703254	4706498	-	2550	protein_coding	-	-
WBGene00017471	345.626	666.339	707.673	169.221	113.751	35.3492	573.213	106.107	2.43028	9.31431e-07	4.27793e-05	F14H12.3	X	4344215	4345644	+	913	protein_coding	-	-
WBGene00018547	344.679	727.612	701.181	206.413	66.3548	114.03	591.157	128.932	2.1948	9.62298e-07	4.40079e-05	clec-78	IV	3989102	4014195	+	10810	protein_coding	C-type LECtin [Source:UniProtKB/TrEMBL;Acc:Q20531]	-
WBGene00003090	13552.3	13627.4	14188.7	6621.94	6501.72	4271.56	13789.5	5798.4	1.24977	9.63446e-07	4.40079e-05	lys-1	V	10277827	10279127	+	1107	protein_coding	Lysozyme-like protein 1 [Source:UniProtKB/Swiss-Prot;Acc:O62415]	-
WBGene00010595	234.837	142.65	161.383	410.036	596.14	1014.87	179.623	673.68	-1.90647	9.68334e-07	4.41107e-05	haao-1	V	9505603	9507049	+	998	protein_coding	3-hydroxyanthranilate 3,4-dioxygenase [Source:UniProtKB/Swiss-Prot;Acc:Q19341]	-
novel.170	40.7176	22.9772	29.6796	0	0	0	31.1248	0	7.34964	1.01063e-06	4.59122e-05	-	IV	3948436	3949261	+	682	-	- && - && -	-
WBGene00010778	6588.68	7283.78	9780.36	3760.06	3170.29	2583.91	7884.27	3171.42	1.31374	1.03515e-06	4.68989e-05	gpdh-2	III	9854077	9859183	-	1553	protein_coding	Probable glycerol-3-phosphate dehydrogenase 2 [Source:UniProtKB/Swiss-Prot;Acc:P34517]	-
WBGene00001233	1962.02	1977	2369.73	4133.83	4593.23	5012.75	2102.92	4579.94	-1.12286	1.03799e-06	4.69003e-05	eif-3.K	V	12954002	12955229	+	841	protein_coding	Eukaryotic translation initiation factor 3 subunit K [Source:UniProtKB/Swiss-Prot;Acc:Q9XUP3]	-
WBGene00003062	2486.62	2321.66	2233.39	4180.32	6248.94	6305.85	2347.22	5578.37	-1.24882	1.04796e-06	4.72233e-05	lpd-6	I	3144410	3147793	-	1842	protein_coding	LiPid Depleted [Source:UniProtKB/TrEMBL;Acc:O44991]	-
WBGene00022441	1082.33	1292.47	1292.92	558.802	530.839	546.203	1222.57	545.281	1.16479	1.07913e-06	4.84971e-05	Y110A2AL.4	II	2839304	2840386	+	977	protein_coding	-	-
WBGene00021876	9317.71	7606.42	7441.23	4161.72	3507.33	3445.98	8121.79	3705.01	1.13225	1.09625e-06	4.91341e-05	Y54G2A.11	IV	2765719	2771790	-	1954	protein_coding	-	-
WBGene00000681	17115.6	17352.6	15479.8	5737.71	7706.64	8467.85	16649.3	7304.07	1.18875	1.10671e-06	4.94706e-05	col-107	IV	1548721	1549714	+	938	protein_coding	COLlagen [Source:UniProtKB/TrEMBL;Acc:Q86S35]	-
WBGene00013267	500.922	429.865	511.046	1212.44	1398.72	947.587	480.611	1186.25	-1.30358	1.11679e-06	4.96688e-05	Y57A10A.27	II	12269815	12275044	-	1353	protein_coding	-	-
WBGene00021248	1974.33	1842.96	1950.51	3517.38	4567.95	5498.52	1922.6	4527.95	-1.23569	1.11946e-06	4.96688e-05	Y22D7AL.10	III	1617151	1618954	-	583	protein_coding	-	-
WBGene00001020	307.75	349.445	417.369	909.331	963.725	775.402	358.188	882.819	-1.30147	1.12006e-06	4.96688e-05	dnj-2	IV	11312437	11313980	-	1295	protein_coding	DnaJ homolog dnj-2 [Source:UniProtKB/Swiss-Prot;Acc:Q17433]	-
WBGene00000977	328.582	454.757	501.771	137.608	148.508	161.922	428.37	149.346	1.52099	1.13948e-06	5.03965e-05	dhs-14	V	2763981	2765274	-	958	protein_coding	DeHydrogenases, Short chain [Source:UniProtKB/TrEMBL;Acc:Q9N5G3]	-
WBGene00004798	3407.02	7243.57	11057.5	1093.43	591.927	2481.29	7236.03	1388.88	2.38147	1.15763e-06	5.10641e-05	sip-1	III	10506106	10506801	-	640	protein_coding	Stress-induced protein 1 [Source:UniProtKB/Swiss-Prot;Acc:Q20363]	-
WBGene00019284	1377.77	1252.26	1023.02	561.591	508.72	405.946	1217.68	492.086	1.30652	1.16879e-06	5.14207e-05	K01A2.10	II	321442	323098	-	888	protein_coding	-	-
WBGene00000176	2325.64	1486.82	1785.41	563.451	818.376	758.298	1865.96	713.375	1.38755	1.18212e-06	5.18707e-05	aqp-8	X	4702442	4704970	-	1326	protein_coding	AQuaPorin or aquaglyceroporin related [Source:UniProtKB/TrEMBL;Acc:A0A2K5AU16]	-
WBGene00022649	4679.69	7363.24	5431.37	2058.55	2810.07	1929.38	5824.76	2266	1.36204	1.1883e-06	5.20052e-05	ZK84.1	II	6020653	6023349	+	2535	protein_coding	-	-
WBGene00011300	3901.32	2621.32	2563.58	6382.98	8915.77	7514.56	3028.74	7604.44	-1.32811	1.20227e-06	5.24792e-05	R107.5	III	9051592	9053793	-	999	protein_coding	-	-
WBGene00018602	4641.81	6108.11	6676.98	2900	2027.51	1727.55	5808.97	2218.35	1.38859	1.21622e-06	5.2848e-05	F48D6.4	X	4246554	4247212	-	566	protein_coding	-	-
WBGene00001973	306.803	645.277	782.8	130.17	100.059	199.552	578.293	143.26	2.0144	1.21896e-06	5.2848e-05	hmg-3	I	5815609	5818132	-	2227	protein_coding	FACT complex subunit ssrp1-B [Source:UniProtKB/Swiss-Prot;Acc:O01683]	HMG
WBGene00015134	87.1168	105.312	173.44	21.3851	22.1183	25.0866	121.956	22.8633	2.41724	1.2202e-06	5.2848e-05	B0304.2	II	4523622	4524589	+	815	protein_coding	-	-
WBGene00011971	846.548	894.197	864.419	2313.31	2012.76	1637.47	868.388	1987.85	-1.195	1.23459e-06	5.33329e-05	lron-9	I	7684882	7689403	-	2609	protein_coding	ELRR (Extracellular Leucine-Rich Repeat) ONly [Source:UniProtKB/TrEMBL;Acc:O02329]	-
WBGene00017584	17.9915	44.0397	105.734	1.85957	2.1065	0	55.9216	1.32202	5.3655	1.2462e-06	5.36959e-05	F19B10.2	II	3675624	3676733	+	835	protein_coding	-	-
WBGene00020219	271.767	254.664	324.621	105.996	66.3548	91.2238	283.684	87.8581	1.68978	1.25786e-06	5.40588e-05	T05A7.1	II	4678026	4679638	+	839	protein_coding	-	-
WBGene00010624	540.692	481.564	454.469	966.048	1224.93	1480.11	492.242	1223.7	-1.3135	1.29132e-06	5.53546e-05	mrps-15	I	8691039	8692622	-	1168	protein_coding	28S ribosomal protein S15, mitochondrial [Source:UniProtKB/Swiss-Prot;Acc:Q9NAP9]	-
WBGene00012814	274.607	394.442	434.992	130.17	68.4613	35.3492	368.014	77.9935	2.23332	1.29849e-06	5.55196e-05	Y43F8B.3	V	19503108	19519950	+	5933	protein_coding	-	-
WBGene00015941	1300.12	1146.95	1330.94	2308.66	3218.74	3222.48	1259.34	2916.63	-1.21149	1.32213e-06	5.6386e-05	C18A3.3	II	5716307	5718038	+	1192	protein_coding	Probable rRNA-processing protein EBP2 homolog [Source:UniProtKB/Swiss-Prot;Acc:Q09958]	-
WBGene00012942	92.7983	199.136	239.292	43.7	32.6508	23.9463	177.075	33.4323	2.40042	1.33668e-06	5.68617e-05	Y47D3B.6	III	11427135	11428414	+	1139	protein_coding	-	-
WBGene00044035	176.127	137.863	177.15	52.068	37.917	35.3492	163.714	41.7781	1.96654	1.45921e-06	6.16802e-05	F27E5.7	II	10122765	10125015	+	646	protein_coding	-	-
WBGene00016095	427.062	606.024	692.833	166.432	70.5678	204.113	575.306	147.038	1.96863	1.45943e-06	6.16802e-05	C25E10.5	V	9030548	9032593	+	1616	protein_coding	-	-
WBGene00021691	2763.12	2773.54	2451.35	1113.88	1191.23	1385.46	2662.67	1230.19	1.11421	1.46167e-06	6.16802e-05	Y48G8AL.13	I	1223957	1229282	-	1217	protein_coding	-	-
WBGene00015057	790.68	865.475	643.676	352.389	290.697	271.391	766.61	304.826	1.32964	1.46471e-06	6.16802e-05	gad-3	V	9168393	9173024	-	3848	protein_coding	Probable aldehyde oxidase gad-3 [Source:UniProtKB/Swiss-Prot;Acc:Q960A1]	-
WBGene00008681	781.21	818.563	917.285	169.221	183.266	394.543	839.02	249.01	1.75431	1.52582e-06	6.40922e-05	scrm-4	I	11680913	11682441	-	980	protein_coding	Phospholipid scramblase [Source:UniProtKB/TrEMBL;Acc:O62149]	-
WBGene00008825	387.291	879.836	1577.66	231.517	54.7691	192.71	948.261	159.665	2.56972	1.55611e-06	6.52008e-05	F14H3.6	V	16057322	16058892	-	1038	protein_coding	-	-
WBGene00016866	1685.52	1685.95	1499.75	787.529	540.318	362.615	1623.74	563.487	1.52593	1.56968e-06	6.56049e-05	coel-1	X	4265851	4270486	+	1703	protein_coding	Tubulin folding COfactor E-Like protein [Source:UniProtKB/TrEMBL;Acc:Q8IFX8]	-
WBGene00016088	439.372	1048.34	1504.39	310.549	183.266	239.463	997.364	244.426	2.02823	1.58956e-06	6.62699e-05	clec-266	X	6617393	6622915	-	1011	protein_coding	C-type LECtin [Source:UniProtKB/TrEMBL;Acc:H2KZ07]	-
WBGene00019079	261.35	267.11	243.929	500.225	773.086	1126.61	257.463	799.975	-1.63502	1.59685e-06	6.64082e-05	rpa-4	I	5509473	5511705	-	1716	protein_coding	Replication Protein A homolog [Source:UniProtKB/TrEMBL;Acc:P91356]	-
WBGene00011648	478.195	426.993	434.064	970.697	945.819	1345.55	446.418	1087.36	-1.28407	1.6025e-06	6.64778e-05	cni-1	V	13180330	13181534	+	603	protein_coding	-	-
WBGene00014173	763.219	1112.48	1546.12	271.498	156.934	453.839	1140.61	294.09	1.95626	1.62178e-06	6.71112e-05	ZK970.7	II	10312293	10312943	+	568	protein_coding	-	-
WBGene00007036	79.5414	141.693	153.963	31.6127	16.852	12.5433	125.066	20.336	2.61047	1.66483e-06	6.87226e-05	sod-5	II	4417683	4419131	+	657	protein_coding	Superoxide dismutase [Cu-Zn] [Source:UniProtKB/TrEMBL;Acc:Q27538]	-
WBGene00001828	229.155	511.243	603.794	123.662	58.9821	17.1045	448.064	66.5827	2.74549	1.72846e-06	7.11734e-05	hch-1	X	14696412	14699977	-	1937	protein_coding	Zinc metalloproteinase nas-34 [Source:UniProtKB/Swiss-Prot;Acc:Q21059]	-
WBGene00016577	999.002	558.155	648.314	7.43829	25.278	0	735.157	10.9054	6.07321	1.74141e-06	7.14388e-05	clec-3	II	3017482	3019907	-	1394	protein_coding	C-type LECtin [Source:UniProtKB/TrEMBL;Acc:O17155]	-
WBGene00000931	4022.52	3332.65	2842.75	8676.77	11803.8	6415.32	3399.31	8965.29	-1.39913	1.74345e-06	7.14388e-05	dao-5	I	10187515	10190896	-	3189	protein_coding	Nucleolar protein dao-5 [Source:UniProtKB/Swiss-Prot;Acc:Q9XVS4]	-
WBGene00015282	1145.78	1058.87	977.572	2131.07	2826.93	2192.79	1060.74	2383.6	-1.16806	1.74981e-06	7.15242e-05	C01B10.8	IV	6635039	6638155	+	2160	protein_coding	-	-
WBGene00001597	380.663	726.654	1009.11	147.836	144.295	257.707	705.475	183.28	1.94587	1.77613e-06	7.24228e-05	gld-3	II	7132643	7137522	+	3847	protein_coding	Defective in germ line development protein 3 [Source:UniProtKB/Swiss-Prot;Acc:Q95ZK7]	-
WBGene00022680	44.5053	46.9118	19.4772	162.713	167.467	166.483	36.9648	165.554	-2.16402	1.81063e-06	7.36498e-05	ZK180.6	IV	4520181	4525043	-	2456	protein_coding	-	-
WBGene00008385	432.743	633.788	1076.81	234.306	169.573	217.797	714.448	207.225	1.78544	1.82631e-06	7.41073e-05	D1081.7	I	8487618	8490938	+	2883	protein_coding	-	-
WBGene00000687	169.499	463.374	525.886	118.083	65.3016	57.0149	386.253	80.1331	2.26613	1.87102e-06	7.57379e-05	col-113	IV	7150663	7152501	-	1089	protein_coding	COLlagen [Source:UniProtKB/TrEMBL;Acc:M1ZJS7]	-
WBGene00020366	8450.33	10937.2	10489	5220.75	4220.38	3764.12	9958.81	4401.75	1.17781	1.90516e-06	7.69334e-05	acdh-10	X	17213144	17214929	-	1410	protein_coding	Probable medium-chain specific acyl-CoA dehydrogenase 10, mitochondrial [Source:UniProtKB/Swiss-Prot;Acc:Q22347]	-
WBGene00006889	859.805	774.524	691.906	1474.64	1875.84	2013.77	775.411	1788.08	-1.20522	1.94372e-06	7.83017e-05	pfd-3	I	12728137	12729870	+	870	protein_coding	Probable prefoldin subunit 3 [Source:UniProtKB/Swiss-Prot;Acc:O18054]	-
WBGene00017398	394.866	264.238	281.956	105.996	112.698	75.2597	313.687	97.9844	1.67711	1.96404e-06	7.893e-05	slc-17.6	I	2250131	2254901	+	2171	protein_coding	SLC (SoLute Carrier) homolog [Source:UniProtKB/TrEMBL;Acc:X5M917]	-
WBGene00009388	2020.73	1540.43	1412.56	3674.52	3480.99	5253.35	1657.91	4136.29	-1.31891	1.97589e-06	7.92156e-05	F35B12.9	V	11601119	11602358	+	1148	protein_coding	-	-
WBGene00008968	149.614	183.818	250.422	55.7872	56.8756	43.3313	194.618	51.998	1.9025	1.98086e-06	7.9225e-05	elli-1	IV	8753195	8754823	-	1056	protein_coding	EnLarged germLIne granules [Source:UniProtKB/TrEMBL;Acc:D3YT17]	-
WBGene00012591	838.026	303.491	496.206	105.066	189.585	78.6805	545.907	124.444	2.13285	2.00245e-06	7.98972e-05	nspe-1	II	12620548	12620888	-	341	protein_coding	Nematode Specific Peptide family, group E [Source:UniProtKB/TrEMBL;Acc:Q9NAJ8]	-
WBGene00017548	465.885	1033.02	1699.16	264.989	171.68	321.564	1066.02	252.744	2.07676	2.02083e-06	8.04387e-05	F18A1.7	II	7662706	7663754	-	904	protein_coding	-	-
WBGene00010896	4162.67	3500.2	4704.22	7044.99	12539	15069	4122.36	11551	-1.48642	2.06766e-06	8.21071e-05	M28.5	II	10658027	10658626	-	520	protein_coding	NHP2-like protein 1 homolog [Source:UniProtKB/Swiss-Prot;Acc:Q21568]	-
WBGene00009189	1762.22	1719.46	1914.33	3987.85	4417.33	3282.92	1798.67	3896.04	-1.11511	2.09605e-06	8.30374e-05	F27D4.4	I	7725019	7727112	+	1371	protein_coding	Zinc finger CCCH domain-containing protein 15 homolog [Source:UniProtKB/Swiss-Prot;Acc:Q93618]	-
WBGene00020803	127.834	181.903	228.162	32.5425	12.639	0	179.3	15.0605	3.55703	2.22163e-06	8.78042e-05	T25E4.1	II	5578318	5579965	+	980	protein_coding	-	-
WBGene00011063	55.8684	85.2072	172.513	3.71915	15.7988	0	104.529	6.50597	4.00238	2.24059e-06	8.82504e-05	cpg-3	I	7244937	7246295	+	1044	protein_coding	Chondroitin proteoglycan 3 [Source:UniProtKB/Swiss-Prot;Acc:Q21771]	-
WBGene00008211	1169.45	1092.38	1012.82	518.821	366.531	234.901	1091.55	373.418	1.54618	2.24347e-06	8.82504e-05	C49F5.7	X	11994766	11995839	+	407	protein_coding	-	-
WBGene00009496	19.8854	53.6135	52.8668	0.929786	0	0	42.1219	0.309929	6.82435	2.34172e-06	9.18987e-05	F36H1.11	IV	11049171	11049632	+	364	protein_coding	-	-
WBGene00014000	1282.13	1826.69	1828.08	697.34	503.454	240.603	1645.63	480.466	1.77517	2.36534e-06	9.25203e-05	ZK550.6	IV	17260307	17262485	-	1030	protein_coding	Probable phytanoyl-CoA dioxygenase [Source:UniProtKB/Swiss-Prot;Acc:O62515]	-
WBGene00022383	514.178	627.086	662.226	245.464	153.775	250.866	601.164	216.701	1.47198	2.36863e-06	9.25203e-05	Y95B8A.2	I	938464	941773	+	913	protein_coding	-	-
WBGene00007709	1298.23	2785.99	5257.93	702.919	327.561	948.728	3114.05	659.736	2.23898	2.41589e-06	9.41464e-05	clec-87	I	10184478	10185470	-	894	protein_coding	C-type lectin domain-containing protein 87 [Source:UniProtKB/Swiss-Prot;Acc:Q9XVS3]	-
WBGene00020421	205.482	314.979	370.995	99.4871	88.4731	50.1731	297.152	79.3778	1.90134	2.58289e-06	0.00010042	T10E10.4	X	6314529	6322819	-	3005	protein_coding	-	-
WBGene00022452	220.633	522.732	766.105	85.5404	72.6743	161.922	503.156	106.712	2.23921	2.59162e-06	0.000100526	Y110A2AR.1	II	2919710	2920904	+	1083	protein_coding	Receptor expression-enhancing protein [Source:UniProtKB/TrEMBL;Acc:Q9N488]	-
WBGene00014097	269.873	527.519	828.247	186.887	69.5146	75.2597	541.879	110.554	2.29047	2.62716e-06	0.000101669	ZK829.9	IV	11970534	11972789	+	2044	protein_coding	-	-
WBGene00021529	343.733	454.757	495.278	961.399	976.364	1223.54	431.256	1053.77	-1.28868	2.64131e-06	0.00010198	Y41G9A.5	X	2946667	2949025	+	1628	protein_coding	-	-
WBGene00013559	152.454	371.465	274.536	69.734	77.9406	49.0328	266.152	65.5691	2.01956	2.8129e-06	0.000108355	Y75B8A.28	III	12319108	12323771	+	1165	protein_coding	-	-
WBGene00010303	2486.62	1908.07	2387.35	4254.7	5176.73	5441.5	2260.68	4957.64	-1.13283	2.9141e-06	0.000111995	cri-3	III	3396585	3397675	+	942	protein_coding	Conserved regulator of innate immunity protein 3 [Source:UniProtKB/Swiss-Prot;Acc:Q21018]	-
WBGene00002005	70455.7	64015.5	55410	115569	143751	194526	63293.7	151282	-1.2571	2.93039e-06	0.000112363	hsp-1	IV	17278959	17281330	+	2073	protein_coding	Heat shock 70 kDa protein A [Source:UniProtKB/Swiss-Prot;Acc:P09446]	-
WBGene00019744	530.276	661.552	662.226	278.936	226.449	257.707	618.018	254.364	1.28039	2.97588e-06	0.000113664	M02H5.8	V	449915	450438	+	437	protein_coding	-	-
WBGene00006063	437.478	645.277	835.666	253.832	151.668	213.236	639.474	206.245	1.63191	2.97792e-06	0.000113664	sto-1	X	7562831	7564805	+	1405	protein_coding	Stomatin-1 [Source:UniProtKB/Swiss-Prot;Acc:Q19200]	-
WBGene00016653	4183.5	4760.11	5365.52	8581	11645.8	11379	4769.71	10535.3	-1.14322	2.99371e-06	0.000114007	ssb-1	I	4634103	4635620	+	1416	protein_coding	Sjogren Syndrome antigen B homolog [Source:UniProtKB/TrEMBL;Acc:O01806]	-
WBGene00010621	309.643	539.965	793.002	126.451	67.4081	190.43	547.537	128.096	2.09688	3.08332e-06	0.000117152	egg-6	I	8676666	8681325	-	3383	protein_coding	Leucine-rich repeat-containing protein egg-6 [Source:UniProtKB/Swiss-Prot;Acc:P90920]	-
WBGene00009367	2301.97	2246.02	2535.75	4266.79	5499.02	7834.99	2361.25	5866.93	-1.31296	3.10092e-06	0.000117554	F33H2.3	I	15034517	15035467	+	896	protein_coding	Acidic leucine-rich nuclear phosphoprotein 32-related protein 1 [Source:UniProtKB/Swiss-Prot;Acc:O62220]	-
WBGene00018755	604.136	712.294	788.365	324.495	291.751	240.603	701.598	285.616	1.29569	3.15456e-06	0.000119317	bcmo-2	II	3908491	3910837	-	1651	protein_coding	Beta-Carotene 15,15'-MonoOxygenase [Source:UniProtKB/TrEMBL;Acc:Q9TXT9]	-
WBGene00019146	1524.54	2479.62	2527.4	885.157	877.358	480.065	2177.19	747.527	1.54184	3.17785e-06	0.000119926	H02F09.3	X	1568678	1572854	+	3828	protein_coding	-	-
WBGene00270321	159.083	332.212	317.201	58.5765	23.1715	80.9611	269.499	54.2364	2.3145	3.2134e-06	0.000120995	Y41C4A.32	III	11721706	11723602	+	990	protein_coding	-	-
WBGene00001915	2388.14	2068.91	2128.58	4503.89	4199.31	6269.36	2195.21	4990.85	-1.18486	3.27289e-06	0.000122958	his-41	V	9545494	9546264	+	557	protein_coding	Probable histone H2B 3 [Source:UniProtKB/Swiss-Prot;Acc:Q27484]	-
WBGene00017075	13932.1	12899.8	13312.2	26605.8	29675.3	24215.4	13381.4	26832.2	-1.00374	3.28869e-06	0.000123052	nap-1	IV	8377703	8379319	-	1341	protein_coding	Nucleosome Assembly Protein [Source:UniProtKB/TrEMBL;Acc:Q19007]	-
WBGene00016262	236.73	181.903	201.265	67.8744	25.278	54.7343	206.633	49.2956	2.06511	3.29012e-06	0.000123052	C30F12.3	I	6970367	6971879	-	956	protein_coding	-	-
WBGene00007605	8294.09	7852.46	6830.95	2539.25	2947	799.349	7659.17	2095.2	1.86994	3.33713e-06	0.000124531	hrg-7	V	12742041	12744207	+	1425	protein_coding	Heme Responsive protein [Source:UniProtKB/TrEMBL;Acc:Q18020]	-
WBGene00013216	2066.18	2375.27	1854.98	1083.2	920.541	815.313	2098.81	939.685	1.15896	3.36104e-06	0.000125145	Y54G11A.7	II	14297305	14299633	+	1505	protein_coding	-	-
WBGene00017134	219.686	442.311	808.769	94.8382	50.556	145.958	490.255	97.1175	2.33704	3.38634e-06	0.000125806	EEED8.3	II	5414207	5415580	+	969	protein_coding	-	-
WBGene00022034	367.406	549.538	770.742	148.766	82.1536	213.236	562.562	148.052	1.92692	3.52076e-06	0.00013051	deps-1	I	506469	509056	+	2052	protein_coding	-	-
WBGene00011509	221.58	392.527	691.906	142.257	71.6211	86.6626	435.338	100.18	2.11765	3.60438e-06	0.000133314	T05H10.4	II	8053137	8054965	+	1578	protein_coding	-	-
WBGene00003763	174.234	90.9515	144.688	24.1744	11.5858	0	136.624	11.9201	3.49999	3.63715e-06	0.000134229	nlp-25	V	19607511	19608346	+	264	protein_coding	Neuropeptide-Like Protein [Source:UniProtKB/TrEMBL;Acc:Q9XWP3]	-
WBGene00011741	149.614	371.465	532.378	67.8744	76.8873	94.6447	351.152	79.8021	2.139	3.65437e-06	0.000134277	T12G3.6	IV	12030047	12031271	-	865	protein_coding	-	-
WBGene00007365	10055.4	9479.06	8247.22	3975.77	3940.21	5098.27	9260.55	4338.08	1.09411	3.65449e-06	0.000134277	C06B3.6	V	13908133	13909513	-	1283	protein_coding	-	-
WBGene00004243	229.155	435.61	652.024	108.785	44.2365	129.994	438.93	94.3385	2.21854	3.66389e-06	0.000134326	puf-7	IV	5486685	5490322	+	1871	protein_coding	Pumilio domain-containing protein 7 [Source:UniProtKB/Swiss-Prot;Acc:O44169]	-
WBGene00012916	13.2569	35.4232	36.172	0	0	0	28.284	0	7.21158	3.68201e-06	0.000134696	Y46G5A.28	II	12850429	12851902	+	1305	protein_coding	-	-
WBGene00000473	1207.33	2500.69	4485.33	526.259	275.952	941.886	2731.11	581.366	2.23231	3.72424e-06	0.000135943	cey-2	I	5619569	5620668	+	1010	protein_coding	C. Elegans Y-box [Source:UniProtKB/TrEMBL;Acc:P91306]	CSD
WBGene00001772	626.862	572.516	723.44	1107.38	1947.46	3510.98	640.939	2188.6	-1.77149	3.82455e-06	0.0001393	gst-24	II	13610443	13611349	-	722	protein_coding	Glutathione S-Transferase [Source:UniProtKB/TrEMBL;Acc:Q93694]	-
WBGene00003228	304.909	430.823	696.543	151.555	100.059	161.922	477.425	137.845	1.7924	3.97489e-06	0.000144461	mex-1	II	11968637	11972334	+	1880	protein_coding	Muscle EXcess [Source:UniProtKB/TrEMBL;Acc:G2HJZ1]	-
WBGene00015677	246.2	314.022	450.759	91.1191	26.3313	98.0656	336.994	71.8387	2.22988	3.99592e-06	0.000144911	cpg-4	V	5996323	5999344	+	2539	protein_coding	Chondroitin proteoglycan 4 [Source:UniProtKB/Swiss-Prot;Acc:O16883]	-
WBGene00001240	1367.35	1204.39	1335.58	2468.58	3293.52	2639.79	1302.44	2800.63	-1.10448	4.07071e-06	0.000147303	elo-2	IV	17466060	17467408	-	1039	protein_coding	Elongation of very long chain fatty acids protein [Source:UniProtKB/TrEMBL;Acc:Q9XVQ9]	-
WBGene00002134	5155.04	5078.92	5150.34	9305.3	10032.2	11917.3	5128.1	10418.3	-1.02258	4.12507e-06	0.000148948	inx-12	I	3755457	3759077	-	1459	protein_coding	Innexin-12 [Source:UniProtKB/Swiss-Prot;Acc:O01634]	-
WBGene00019855	1078.54	1007.17	1163.07	2129.21	2555.19	2124.37	1082.93	2269.59	-1.06746	4.33918e-06	0.000156341	R03H10.2	II	4155773	4167368	+	1382	protein_coding	-	-
WBGene00008005	192.225	260.408	473.946	83.6808	55.8223	94.6447	308.86	78.0493	1.98505	4.39482e-06	0.000158006	C38D4.4	III	4793086	4795423	+	1834	protein_coding	-	-
WBGene00003231	474.408	966	1530.35	253.832	87.4198	296.477	990.254	212.576	2.21998	4.44238e-06	0.000159373	mex-6	II	9524174	9526390	+	1926	protein_coding	Zinc finger protein mex-6 [Source:UniProtKB/Swiss-Prot;Acc:Q09436]	-
WBGene00011838	1496.14	1466.71	1651.86	3155.7	3590.53	2837.06	1538.23	3194.43	-1.0543	4.53441e-06	0.000162326	T19C4.1	V	11149705	11151309	+	1342	protein_coding	-	-
WBGene00019510	9241.96	7907.99	8493	17610.2	25279.1	15821.6	8547.65	19570.3	-1.19507	4.59983e-06	0.000164316	K07H8.10	IV	8286587	8289531	-	2694	protein_coding	-	-
WBGene00019932	356.043	318.809	217.032	701.989	851.027	722.949	297.295	758.655	-1.35165	4.88352e-06	0.000174078	R07C12.2	IV	4148141	4150055	+	1113	pseudogene	-	-
WBGene00022644	2569.95	2935.34	2958.69	1430.01	1428.21	1352.39	2821.32	1403.54	1.00725	4.99451e-06	0.000177656	dod-19	V	411782	414760	-	1397	protein_coding	Downstream Of DAF-16 (Regulated by DAF-16) [Source:UniProtKB/TrEMBL;Acc:A0A0K3ASK2]	-
WBGene00003778	1062.45	1360.44	1216.86	636.904	381.277	408.227	1213.25	475.469	1.35059	5.01542e-06	0.000178021	nnt-1	X	6122315	6127541	+	3224	protein_coding	Nicotinamide Nucleotide Transhydrogenase [Source:UniProtKB/TrEMBL;Acc:Q18031]	-
WBGene00009430	6955.14	9134.4	9384.32	4212.86	3705.34	2400.33	8491.29	3439.51	1.30365	5.03572e-06	0.000178363	F35E12.6	V	13734118	13736247	-	1200	protein_coding	-	-
WBGene00013465	329.529	186.69	166.02	616.448	827.855	597.516	227.413	680.607	-1.58158	5.12802e-06	0.000181248	Y67H2A.10	IV	13283002	13289536	-	2217	protein_coding	-	zf-C2H2
WBGene00001427	7310.24	6122.47	7065.6	11557.2	17348.1	16866.1	6832.77	15257.2	-1.15892	5.15283e-06	0.000181741	fkb-2	I	12918722	12919278	+	504	protein_coding	Peptidylprolyl isomerase [Source:UniProtKB/TrEMBL;Acc:Q9U2Q8]	-
WBGene00016939	192.225	278.599	328.331	75.3127	91.6328	87.8029	266.385	84.9162	1.65046	5.20185e-06	0.000183083	C55B6.1	X	7200364	7204044	+	1998	protein_coding	-	-
WBGene00020290	49.2399	143.608	260.624	22.3149	13.6923	27.3671	151.157	21.1248	2.8406	5.23105e-06	0.000183724	T06D4.1	II	3381836	3384017	+	1704	protein_coding	-	-
WBGene00017589	99.4268	182.86	226.307	47.4191	38.9703	27.3671	169.531	37.9188	2.15664	5.36203e-06	0.00018793	F19B10.10	II	3677535	3681415	-	2145	protein_coding	-	-
WBGene00003413	814.353	779.31	907.083	331.934	429.726	315.862	833.582	359.174	1.21464	5.38109e-06	0.000188203	mrp-7	V	19674843	19693043	+	4904	protein_coding	-	-
WBGene00007024	7209.86	8896.01	7540.47	4009.24	3976.02	2936.27	7882.12	3640.51	1.11435	5.43936e-06	0.000189844	plin-1	I	7057170	7059351	+	1939	protein_coding	Perilipin-1 homolog [Source:UniProtKB/Swiss-Prot;Acc:A8WHP8]	-
WBGene00008915	2390.98	2303.47	2246.38	1179.9	1036.4	1214.42	2313.61	1143.57	1.01661	5.50294e-06	0.000191663	F17C11.4	V	10951818	10953472	+	960	protein_coding	-	-
WBGene00007050	1549.16	1484.9	1253.04	2696.38	3453.61	2954.51	1429.03	3034.83	-1.08656	5.53131e-06	0.000192251	utp-20	II	6536380	6554846	+	8021	protein_coding	UTP small subunit (SSU) processome component homolog [Source:UniProtKB/TrEMBL;Acc:Q19545]	-
WBGene00000170	9439.86	8183.72	6618.55	14740.8	18940.6	20645.1	8080.71	18108.8	-1.16413	5.564e-06	0.000192821	aqp-2	II	9258913	9261994	-	1240	protein_coding	AQuaPorin or aquaglyceroporin related [Source:UniProtKB/TrEMBL;Acc:Q17571]	-
WBGene00010663	147.72	216.369	294.941	75.3127	44.2365	52.4537	219.677	57.3343	1.93521	5.57078e-06	0.000192821	toca-2	III	13755896	13759434	+	2022	protein_coding	Transducer of Cdc42-dependent actin assembly protein 2 homolog [Source:UniProtKB/Swiss-Prot;Acc:Q9XUS7]	-
WBGene00019341	50.1868	110.099	180.86	20.4553	2.1065	11.403	113.715	11.3216	3.31847	5.68214e-06	0.000196269	K02F6.7	II	2525220	2529255	-	1679	protein_coding	-	-
WBGene00020068	1255.62	1218.75	1186.26	3148.26	3429.39	2036.57	1220.21	2871.4	-1.23475	5.88122e-06	0.000202726	cra-1	III	6865207	6869460	-	3262	protein_coding	N-terminal acetyltransferase B complex subunit NAA25 homolog [Source:UniProtKB/Swiss-Prot;Acc:Q21986]	-
WBGene00021595	1239.52	1181.41	1198.31	2218.47	2926.98	2419.71	1206.42	2521.72	-1.06363	6.03328e-06	0.00020754	Y46E12BL.2	II	15233153	15244931	+	4187	protein_coding	-	-
WBGene00008440	245.253	422.206	609.359	142.257	114.804	123.152	425.606	126.738	1.74716	6.153e-06	0.000211223	DY3.8	I	8758156	8759032	-	787	protein_coding	-	-
WBGene00018744	1225.32	853.029	1072.18	1877.24	2805.86	4585.14	1050.17	3089.41	-1.55653	6.19404e-06	0.000212197	F53B3.6	X	2864211	2865683	+	1417	protein_coding	-	-
WBGene00007599	2426.01	2058.38	2013.58	1096.22	710.944	442.436	2165.99	749.866	1.5296	6.22186e-06	0.000212714	C15A11.7	I	7404950	7408511	+	1665	protein_coding	-	-
WBGene00019220	868.327	795.586	864.419	1567.62	1905.33	3097.05	842.777	2190	-1.37746	6.23659e-06	0.000212782	pfd-2	II	4326720	4328284	+	565	protein_coding	Prefoldin subunit 2 [Source:UniProtKB/Swiss-Prot;Acc:Q9N5M2]	-
WBGene00010251	1671.32	1629.47	1649.07	888.876	678.294	779.964	1649.95	782.378	1.07623	6.33677e-06	0.00021576	sta-2	V	9741206	9744326	+	1816	protein_coding	Signal transducer and activator of transcription b [Source:UniProtKB/Swiss-Prot;Acc:Q20977]	-
WBGene00012597	11.3631	11.4886	1.85498	82.751	50.556	93.5044	8.23555	75.6038	-3.20107	6.46522e-06	0.000219686	nhr-235	II	12640670	12642740	+	685	protein_coding	Nuclear Hormone Receptor family [Source:UniProtKB/TrEMBL;Acc:Q9NAJ2]	-
WBGene00004305	956.391	884.623	1145.45	1824.24	2267.65	2664.88	995.487	2252.26	-1.17768	6.52702e-06	0.000221336	ran-4	I	8591215	8591978	+	635	protein_coding	Probable nuclear transport factor 2 [Source:UniProtKB/Swiss-Prot;Acc:Q21735]	-
WBGene00043302	461.151	441.354	324.621	145.047	150.615	174.466	409.042	156.709	1.3849	6.71732e-06	0.000227328	F32D8.11	V	10887873	10889004	-	923	protein_coding	-	-
WBGene00020039	72.913	207.752	200.337	31.6127	5.26626	28.5074	160.334	21.7955	2.8769	6.73398e-06	0.000227432	R12E2.14	I	4149981	4150634	+	316	protein_coding	-	-
WBGene00020806	1114.53	1184.28	944.182	542.065	481.336	374.018	1081	465.806	1.21381	6.84172e-06	0.000230605	T25F10.3	V	6745039	6748613	+	1760	protein_coding	-	-
WBGene00003066	621.181	608.896	552.783	1191.06	1239.68	1233.8	594.286	1221.51	-1.03943	7.08861e-06	0.000238445	lpl-1	IV	9092281	9093975	-	931	protein_coding	Putative lipoyltransferase 2, mitochondrial [Source:UniProtKB/TrEMBL;Acc:A0A1N7SYX2]	-
WBGene00001031	4569.84	3093.31	3472.51	8314.15	9566.68	7078.97	3711.89	8319.93	-1.16443	7.1891e-06	0.00024134	dnj-13	II	11545563	11547366	+	1542	protein_coding	DNaJ domain (Prokaryotic heat shock protein) [Source:UniProtKB/TrEMBL;Acc:Q20774]	-
WBGene00010478	5638.92	5141.15	6033.31	9542.4	12811.7	12854.6	5604.46	11736.2	-1.06629	7.27449e-06	0.000243717	K01G5.5	III	10748429	10750080	+	1503	protein_coding	Putative H/ACA ribonucleoprotein complex subunit 4 [Source:UniProtKB/Swiss-Prot;Acc:O17919]	-
WBGene00016790	857.911	658.68	770.742	1260.79	2231.84	2991	762.444	2161.21	-1.50289	7.34651e-06	0.000245638	C49H3.3	IV	7924350	7924968	+	454	protein_coding	-	-
WBGene00009211	973.435	979.404	1031.37	1724.75	2458.29	2265.77	994.735	2149.6	-1.11153	7.41845e-06	0.000247548	wdr-46	IV	12372253	12374908	+	1974	protein_coding	WD Repeat protein [Source:UniProtKB/TrEMBL;Acc:Q19873]	-
WBGene00018991	170.446	362.848	483.221	73.4531	56.8756	116.31	338.838	82.213	2.04508	7.47547e-06	0.000248954	F56F11.4	III	2855554	2865497	+	1822	protein_coding	-	-
WBGene00009662	32.1953	44.997	82.5464	5.57872	0	0	53.2463	1.85957	4.76381	7.50335e-06	0.000249084	F43G6.10	II	11809347	11810307	+	406	protein_coding	-	-
WBGene00011435	14.2038	18.1903	48.2294	0	0	0	26.8745	0	7.13816	7.50918e-06	0.000249084	T04D3.8	I	13309994	13310715	+	429	protein_coding	-	-
WBGene00003844	1276.45	2180.92	2507	833.089	733.063	400.245	1988.12	655.465	1.60029	7.68132e-06	0.00025429	odc-1	V	6898540	6900223	-	1580	protein_coding	Ornithine decarboxylase [Source:UniProtKB/Swiss-Prot;Acc:P41931]	-
WBGene00020774	336.157	389.655	352.445	165.502	128.497	122.012	359.419	138.67	1.37229	7.78448e-06	0.000257195	T24E12.5	II	3753921	3757428	+	2118	protein_coding	-	-
WBGene00016277	184.65	231.687	351.518	93.9084	44.2365	64.997	255.951	67.714	1.91582	7.846e-06	0.000258717	C30G12.6	II	7292192	7296015	-	3386	protein_coding	-	-
WBGene00009119	17468.8	17545	16841.3	29485.4	37568.4	51912.1	17285	39655.3	-1.19798	7.97753e-06	0.000262408	ndk-1	I	10553116	10553913	-	659	protein_coding	Nucleoside diphosphate kinase [Source:UniProtKB/TrEMBL;Acc:Q93576]	-
WBGene00000196	375.928	438.482	383.052	862.842	800.471	920.22	399.154	861.178	-1.10934	7.98933e-06	0.000262408	aars-1	II	11460215	11464129	-	2605	protein_coding	Alanine--tRNA ligase, mitochondrial [Source:UniProtKB/Swiss-Prot;Acc:Q23122]	-
WBGene00009334	3088.86	4720.86	3464.17	1946.04	1488.24	1343.27	3757.96	1592.52	1.23841	8.0654e-06	0.000264387	F32D8.12	V	10888572	10891030	-	1688	protein_coding	-	-
WBGene00006408	1591.78	1305.87	1424.62	2478.81	3405.16	3675.18	1440.76	3186.38	-1.14496	8.16756e-06	0.000267205	tag-18	X	3731894	3733457	-	814	protein_coding	-	-
WBGene00009156	62.4968	152.224	201.265	18.5957	34.7573	19.3851	138.662	24.246	2.51685	8.18334e-06	0.000267205	clec-196	IV	17276956	17277748	+	540	protein_coding	C-type LECtin [Source:UniProtKB/TrEMBL;Acc:F5GUE2]	-
WBGene00019247	135.41	237.431	310.708	60.4361	20.0118	61.5761	227.85	47.3413	2.26654	8.28698e-06	0.000270062	syp-4	I	6847511	6849923	+	2044	protein_coding	Synaptonemal complex protein 4 [Source:UniProtKB/Swiss-Prot;Acc:Q9N5K3]	-
WBGene00010616	533.117	501.669	513.828	980.925	1173.32	2092.45	516.205	1415.56	-1.45501	8.63707e-06	0.000280923	K07A1.10	I	9615195	9616474	-	881	protein_coding	-	-
WBGene00044206	703.563	958.341	670.574	266.849	209.597	383.14	777.493	286.529	1.44093	8.80005e-06	0.000285668	T26H5.9	V	15444916	15445420	+	352	protein_coding	-	-
WBGene00001595	394.866	522.732	886.678	233.376	110.591	180.167	601.425	174.712	1.78258	8.84465e-06	0.00028656	gld-1	I	7695661	7698227	+	2244	protein_coding	Female germline-specific tumor suppressor gld-1 [Source:UniProtKB/Swiss-Prot;Acc:Q17339]	-
WBGene00013986	72.913	41.1675	95.5312	114.364	400.235	612.34	69.8706	375.646	-2.4254	8.91638e-06	0.000288325	ZK512.7	III	9138052	9138701	-	533	protein_coding	-	-
WBGene00007855	554.896	607.939	521.248	251.042	210.65	266.83	561.361	242.841	1.20904	9.11178e-06	0.000294075	C31H5.4	I	9042270	9042599	-	330	protein_coding	-	-
WBGene00020551	175.181	280.513	247.639	92.0489	63.1951	51.3134	234.444	68.8524	1.76393	9.2566e-06	0.000298173	T17H7.7	III	755298	758080	-	1681	protein_coding	-	-
WBGene00008652	420.433	945.895	1284.57	341.232	129.55	88.9432	883.633	186.575	2.24168	9.48412e-06	0.000304914	F10D11.6	I	8445351	8451023	-	2885	protein_coding	-	-
WBGene00012964	2120.16	1942.53	2246.38	3478.33	5192.53	7166.77	2103.02	5279.21	-1.32775	9.51778e-06	0.000305409	Y48A6B.3	III	11008222	11008934	+	618	protein_coding	Putative H/ACA ribonucleoprotein complex subunit 2-like protein [Source:UniProtKB/Swiss-Prot;Acc:Q9XXD4]	-
WBGene00012661	13.2569	35.4232	25.9697	0	0	0	24.8833	0	7.02662	9.77716e-06	0.000313131	clec-163	III	10794349	10796369	+	1158	protein_coding	C-type LECtin [Source:UniProtKB/TrEMBL;Acc:Q9XXS0]	-
WBGene00018108	78.5945	110.099	146.543	22.3149	26.3313	26.2268	111.746	24.9577	2.16463	9.8846e-06	0.000315967	F36H5.10	II	1756820	1757761	+	881	protein_coding	-	-
WBGene00001601	283.13	268.067	463.744	139.468	52.6626	49.0328	338.314	80.3878	2.06883	9.92788e-06	0.000316632	glh-4	I	3726011	3731265	+	3873	protein_coding	ATP-dependent RNA helicase glh-4 [Source:UniProtKB/Swiss-Prot;Acc:O76743]	-
WBGene00013214	180.862	342.743	439.629	89.2595	82.1536	108.328	321.078	93.2471	1.7847	9.94327e-06	0.000316632	Y54G11A.3	II	14276621	14283973	+	1729	protein_coding	-	-
WBGene00016004	1962.02	1247.47	1209.44	581.117	680.4	567.868	1472.98	609.795	1.27233	9.98333e-06	0.000316929	C18H9.6	II	6700660	6701625	-	778	protein_coding	-	-
WBGene00019983	3950.56	4214.4	3900.09	7006.87	8055.26	10158.9	4021.68	8407.02	-1.06375	9.99051e-06	0.000316929	sti-1	V	773518	774854	+	1175	protein_coding	Stress-induced-phosphoprotein 1 [Source:UniProtKB/Swiss-Prot;Acc:O16259]	-
WBGene00000866	109.843	321.681	452.614	83.6808	23.1715	49.0328	294.713	51.9617	2.50075	1.03561e-05	0.000327568	cyb-2.1	IV	10985985	10987426	+	1268	protein_coding	CYclin B [Source:UniProtKB/TrEMBL;Acc:O45926]	-
WBGene00014759	89.9576	45.9544	37.0995	202.693	235.928	207.534	57.6705	215.385	-1.90123	1.03651e-05	0.000327568	F46A8.1	I	11250139	11251602	+	974	pseudogene	-	-
WBGene00001249	279.342	350.403	301.434	684.323	659.335	709.265	310.393	684.308	-1.14056	1.03949e-05	0.000327891	elt-1	IV	9614970	9620140	+	2091	protein_coding	Transcription factor elt-1 [Source:UniProtKB/Swiss-Prot;Acc:P28515]	zf-GATA
WBGene00010263	115.524	121.588	243.929	43.7	36.8638	17.1045	160.347	32.5561	2.29452	1.04901e-05	0.000330271	wago-4	II	12919551	12923377	+	3369	protein_coding	Piwi-like protein [Source:UniProtKB/TrEMBL;Acc:O62275]	-
WBGene00002804	830.45	708.464	681.703	1446.75	1625.17	1496.07	740.206	1522.66	-1.04058	1.07423e-05	0.000337573	let-630	I	5162599	5164884	-	2097	protein_coding	-	-
WBGene00001430	503.762	562.942	835.666	1218.02	1634.65	2418.57	634.123	1757.08	-1.47003	1.11302e-05	0.000349109	fkb-5	I	3898046	3899840	-	1420	protein_coding	Peptidylprolyl isomerase [Source:UniProtKB/TrEMBL;Acc:P91180]	-
WBGene00001169	50942.5	48673.4	44949.8	99395.1	117550	81386.5	48188.6	99443.9	-1.0452	1.12442e-05	0.000352025	eef-1A.2	X	7823652	7825769	+	1919	protein_coding	Elongation factor 1-alpha [Source:UniProtKB/Swiss-Prot;Acc:P53013]	-
WBGene00000867	222.527	458.587	768.887	80.8914	24.2248	148.239	483.334	84.4516	2.51853	1.12665e-05	0.000352064	cyb-2.2	I	4114734	4116370	+	1390	protein_coding	CYclin B [Source:UniProtKB/TrEMBL;Acc:Q9BLB5]	-
WBGene00003055	909.045	1126.84	1244.69	1948.83	2850.1	2573.65	1093.52	2457.53	-1.16809	1.15207e-05	0.000359335	lon-1	III	5474478	5478005	+	1173	protein_coding	-	-
WBGene00001790	405.282	471.033	458.179	1030.2	1093.27	813.032	444.831	978.837	-1.13803	1.15496e-05	0.000359566	gst-42	X	11726271	11727936	-	1008	protein_coding	Probable maleylacetoacetate isomerase [Source:UniProtKB/Swiss-Prot;Acc:Q18938]	-
WBGene00000298	2769.75	1742.44	1661.13	913.05	833.122	870.047	2057.77	872.073	1.2385	1.17167e-05	0.000364089	cat-4	V	10564880	10566445	+	894	protein_coding	GTP cyclohydrolase 1 [Source:UniProtKB/Swiss-Prot;Acc:Q19980]	-
WBGene00000240	2807.62	3212.02	2916.02	6008.28	6640.75	5187.21	2978.56	5945.41	-0.997197	1.18077e-05	0.000366236	pah-1	II	8762668	8766922	-	1587	protein_coding	Phenylalanine-4-hydroxylase [Source:UniProtKB/Swiss-Prot;Acc:P90925]	-
WBGene00016111	212.11	251.792	229.089	99.4871	52.6626	44.4716	230.997	65.5404	1.81218	1.18494e-05	0.000366849	C25H3.1	II	5700170	5701408	+	1058	protein_coding	-	-
WBGene00004821	27.4607	81.3776	108.516	4.64893	3.15975	12.5433	72.4515	6.78399	3.43259	1.18865e-05	0.000367059	skr-15	II	3824148	3825614	+	1467	protein_coding	SKR-15; SKp1 Related (Ubiquitin ligase complex component) [Source:UniProtKB/TrEMBL;Acc:G5EE88]	-
WBGene00013983	1304.86	1200.56	1200.17	2269.61	2724.76	2372.96	1235.2	2455.78	-0.991408	1.19001e-05	0.000367059	ZK512.2	III	9141789	9144794	-	1867	protein_coding	Probable ATP-dependent RNA helicase DDX55 homolog [Source:UniProtKB/Swiss-Prot;Acc:P34640]	-
WBGene00011642	158.136	269.982	294.014	93.9084	50.556	50.1731	240.711	64.8792	1.88755	1.21109e-05	0.000372874	T09B9.1	X	9757271	9759306	+	1612	protein_coding	-	-
WBGene00020812	6940.94	8830.91	7967.12	4040.85	4156.13	2963.63	7912.99	3720.2	1.08876	1.23802e-05	0.000380463	acdh-7	X	17215018	17217105	-	1344	protein_coding	Acyl CoA DeHydrogenase [Source:UniProtKB/TrEMBL;Acc:Q22781]	-
WBGene00008588	148.667	312.107	285.666	79.0318	69.5146	29.6477	248.813	59.3981	2.06252	1.25572e-05	0.000385196	F08G12.5	X	11308864	11310285	-	660	protein_coding	-	-
WBGene00014092	2761.22	2853.96	2513.49	1482.08	1312.35	1004.6	2709.56	1266.34	1.09706	1.26342e-05	0.00038653	ZK822.5	IV	11937384	11940604	+	1865	protein_coding	-	-
WBGene00002110	624.021	551.453	462.816	926.067	1485.08	2240.69	546.097	1550.61	-1.50532	1.2647e-05	0.00038653	ins-27	I	14027236	14027588	+	310	protein_coding	INSulin related [Source:UniProtKB/TrEMBL;Acc:Q7JKM7]	-
WBGene00009393	1536.85	1051.21	932.125	217.57	410.768	44.4716	1173.4	224.27	2.38673	1.29241e-05	0.00039428	clec-62	II	12893065	12895098	-	1257	protein_coding	C-type LECtin [Source:UniProtKB/TrEMBL;Acc:O45440]	-
WBGene00017334	2042.51	2515.05	2518.13	34.4021	57.9288	0	2358.56	30.777	6.25884	1.35495e-05	0.000412605	F10D2.8	V	7148688	7150692	-	1541	protein_coding	-	-
WBGene00019799	61.5499	100.525	166.948	24.1744	3.15975	13.6836	109.674	13.6726	2.99508	1.40599e-05	0.00042737	M151.7	II	3622314	3624058	+	1406	protein_coding	-	-
WBGene00012717	1616.4	1489.69	1368.04	696.41	742.542	781.104	1491.38	740.019	1.0112	1.40981e-05	0.000427752	Y39E4B.6	III	13070756	13074697	+	2074	protein_coding	-	-
WBGene00007969	7035.63	9081.74	7729.68	4218.44	4065.55	3799.47	7949.02	4027.82	0.980739	1.42207e-05	0.000430691	acs-19	III	3864036	3867098	+	2385	protein_coding	Acetyl-coenzyme A synthetase [Source:UniProtKB/TrEMBL;Acc:Q65ZB8]	-
WBGene00022470	463.045	387.74	409.95	827.51	866.826	1310.2	420.245	1001.51	-1.25248	1.45215e-05	0.000439007	mrpl-19	I	4508917	4511126	-	1002	protein_coding	Probable 39S ribosomal protein L19, mitochondrial [Source:UniProtKB/Swiss-Prot;Acc:Q95Y83]	-
WBGene00000877	1635.33	1348	1297.56	2456.5	3240.85	3545.19	1426.96	3080.84	-1.11026	1.48223e-05	0.00044729	cyn-1	V	14356076	14356823	+	685	protein_coding	Peptidyl-prolyl cis-trans isomerase 1 [Source:UniProtKB/Swiss-Prot;Acc:P52009]	-
WBGene00008739	564.365	738.143	984.064	332.864	261.206	315.862	762.191	303.311	1.32922	1.50283e-05	0.00045269	F13D12.3	II	11720444	11722308	+	1035	protein_coding	-	-
WBGene00010034	15.1507	13.4034	14.8398	121.802	121.124	36.4895	14.4646	93.1385	-2.68857	1.53419e-05	0.000461307	F54B11.11	X	13578783	13581728	+	1827	protein_coding	-	-
WBGene00002044	623.074	725.697	751.265	1642	1857.93	1203.01	700.012	1567.65	-1.16329	1.55356e-05	0.000466278	hyl-2	X	4696952	4699461	-	1286	protein_coding	Ceramide synthase hyl-2 [Source:UniProtKB/Swiss-Prot;Acc:Q7Z139]	-
WBGene00000388	71.0191	134.991	280.101	41.8404	10.5325	20.5254	162.037	24.2994	2.73086	1.55635e-05	0.000466278	cdc-25.3	III	8916351	8917929	-	1138	protein_coding	M-phase inducer phosphatase cdc-25.3 [Source:UniProtKB/Swiss-Prot;Acc:P30634]	-
WBGene00007089	548.268	467.203	492.496	970.697	1025.87	1574.75	502.656	1190.44	-1.2435	1.55909e-05	0.000466278	B0001.4	IV	12135074	12138193	-	1247	protein_coding	Probable uridine-cytidine kinase [Source:UniProtKB/Swiss-Prot;Acc:Q17413]	-
WBGene00019324	2107.85	1329.81	1366.19	3276.57	3435.7	5917.01	1601.28	4209.76	-1.39442	1.56385e-05	0.000466864	K02F2.5	I	6804788	6810451	-	1030	protein_coding	-	-
WBGene00016500	1803.89	1734.78	1823.44	1018.12	819.429	816.453	1787.37	884.666	1.0143	1.682e-05	0.000501243	memo-1	V	7844343	7847164	-	1761	protein_coding	Protein memo-1 homolog, partial [Source:RefSeq peptide;Acc:NP_001337309]	-
WBGene00009946	56.8153	110.099	106.661	23.2447	8.42601	13.6836	91.1918	15.1181	2.58438	1.70425e-05	0.000506968	ogr-2	II	10041134	10042515	+	1244	protein_coding	Oocyte and Germ-line Related [Source:UniProtKB/TrEMBL;Acc:Q20682]	-
WBGene00000678	132.569	282.428	376.56	45.5595	25.278	91.2238	263.852	54.0205	2.29154	1.71117e-05	0.000507571	col-104	IV	1353636	1355305	-	921	protein_coding	COLlagen [Source:UniProtKB/TrEMBL;Acc:O44174]	-
WBGene00001683	820.034	1557.66	2826.98	472.332	239.088	638.567	1734.89	449.995	1.94711	1.71235e-05	0.000507571	gpd-1	II	10394114	10395349	+	1136	protein_coding	Glyceraldehyde-3-phosphate dehydrogenase 1 [Source:UniProtKB/Swiss-Prot;Acc:P04970]	-
WBGene00003783	71.966	152.224	230.944	21.3851	34.7573	36.4895	151.712	30.8773	2.30071	1.72892e-05	0.000511576	nos-1	II	10951879	10953165	-	936	protein_coding	NanOS related [Source:UniProtKB/TrEMBL;Acc:Q09597]	-
WBGene00020413	177.074	158.926	132.631	366.336	354.946	420.77	156.21	380.684	-1.28497	1.75622e-05	0.000518737	T10E9.3	I	6534072	6539193	+	1961	protein_coding	-	-
WBGene00011320	56.8153	110.099	179.005	24.1744	12.639	23.9463	115.307	20.2532	2.50868	1.76365e-05	0.000520012	T01C3.3	V	14991707	14992677	-	876	protein_coding	-	-
WBGene00004217	336.157	606.981	849.579	138.538	78.9938	244.024	597.572	153.852	1.95891	1.76838e-05	0.000520488	ptr-2	I	3789309	3792797	-	2909	protein_coding	PaTched Related family [Source:UniProtKB/TrEMBL;Acc:P91129]	-
WBGene00017020	45.4522	62.23	55.6493	202.693	171.68	143.678	54.4438	172.684	-1.66635	1.82081e-05	0.000534936	D1014.7	V	8118264	8120351	+	1578	protein_coding	-	-
WBGene00001478	592.773	671.126	716.948	295.672	287.538	330.686	660.282	304.632	1.11639	1.82386e-05	0.000534936	fmo-3	III	10694590	10698861	+	1714	protein_coding	Flavin-containing monooxygenase [Source:UniProtKB/TrEMBL;Acc:A0A1X7RC69]	-
WBGene00001856	543.533	1015.78	1520.15	234.306	225.396	442.436	1026.49	300.712	1.77217	1.83796e-05	0.000537861	hil-5	I	5774585	5775610	+	867	protein_coding	Histone H1.5 [Source:UniProtKB/Swiss-Prot;Acc:O01833]	-
WBGene00017128	789.733	858.773	652.951	312.408	332.827	391.122	767.152	345.453	1.15159	1.84027e-05	0.000537861	E04F6.9	II	7211625	7212159	-	445	protein_coding	-	-
WBGene00014258	5568.85	6206.72	4466.78	2741.94	2691.06	1778.86	5414.12	2403.95	1.17116	1.8706e-05	0.000545771	ZK1320.9	II	9684088	9686713	-	1573	protein_coding	-	-
WBGene00022851	627.809	582.089	633.474	1183.62	1481.92	1156.26	614.458	1273.93	-1.05188	1.89376e-05	0.000551564	ZK1127.4	II	7053949	7055208	+	1162	protein_coding	-	-
WBGene00008584	5142.73	5044.46	5355.31	2338.41	2562.56	1147.14	5180.83	2016.04	1.36148	1.90919e-05	0.000555093	irg-4	IV	12435802	12438274	+	1171	protein_coding	Infection Response protein [Source:UniProtKB/TrEMBL;Acc:Q19223]	-
WBGene00014135	147.72	172.329	230.017	65.0851	22.1183	46.7522	183.355	44.6518	2.03463	1.91337e-05	0.000555341	ZK896.4	IV	12880634	12883146	-	1491	protein_coding	-	-
WBGene00021192	175.181	257.536	486.004	59.5063	33.704	109.469	306.24	67.5597	2.18305	1.91929e-05	0.000556095	Y14H12B.2	II	3932178	3933740	-	1415	protein_coding	-	-
WBGene00003622	202.641	236.474	304.216	561.591	583.501	586.113	247.777	577.068	-1.21947	1.94519e-05	0.000562624	nhr-23	I	7214745	7221781	+	3068	protein_coding	Nuclear hormone receptor family member nhr-23 [Source:UniProtKB/Swiss-Prot;Acc:P41828]	THR-like
WBGene00015541	336.157	294.874	330.186	623.887	687.773	743.474	320.406	685.045	-1.09598	1.98803e-05	0.000574022	C06E7.4	IV	5850826	5859976	-	1606	protein_coding	-	-
WBGene00013365	657.164	763.992	730.86	365.406	330.721	248.585	717.339	314.904	1.18671	1.99609e-05	0.000575263	Y60A3A.19	V	19916557	19919996	+	1035	protein_coding	-	-
WBGene00001158	828.556	188.605	179.005	109.715	15.7988	20.5254	398.722	48.6796	3.02855	1.99921e-05	0.000575263	ech-9	IV	10233321	10235329	-	1639	protein_coding	Enoyl-CoA Hydratase [Source:UniProtKB/TrEMBL;Acc:A0A061AKU6]	-
WBGene00017154	136.357	70.8464	69.5616	164.572	282.271	1171.09	92.2549	539.31	-2.5468	2.0645e-05	0.000593029	ugt-57	X	6991727	6994162	+	1947	protein_coding	UDP-GlucuronosylTransferase [Source:UniProtKB/TrEMBL;Acc:Q19082]	-
WBGene00008988	111.737	132.119	155.818	35.3319	24.2248	45.6119	133.225	35.0562	1.92834	2.0799e-05	0.000596429	F20G2.5	V	13771508	13773695	+	1520	protein_coding	-	-
WBGene00020098	91.8514	97.6532	156.745	28.8234	31.5975	22.806	115.417	27.7423	2.05503	2.084e-05	0.000596581	R144.10	III	5001297	5002331	-	798	protein_coding	-	-
WBGene00007109	370.246	558.155	904.301	245.464	193.798	150.519	610.901	196.594	1.63464	2.10223e-05	0.000600772	edg-1	IV	11320800	11323634	+	2484	protein_coding	Enlarged Deps-1 Granule phenotype [Source:UniProtKB/TrEMBL;Acc:Q17436]	-
WBGene00001569	159.083	227.857	268.044	83.6808	50.556	26.2268	218.328	53.4879	2.0233	2.14746e-05	0.000612648	meg-3	X	1986429	1989607	-	2815	protein_coding	-	-
WBGene00007506	111.737	247.962	238.364	60.4361	47.3963	57.0149	199.355	54.9491	1.85863	2.20102e-05	0.000626861	C10C5.2	IV	9371508	9373636	+	1500	protein_coding	-	-
WBGene00017666	14.2038	22.9772	28.7521	0	0	0	21.9777	0	6.8477	2.22628e-05	0.000632977	F21E9.2	X	1328143	1329947	-	531	protein_coding	-	-
WBGene00018468	2140.04	1206.3	848.651	4079.9	4238.28	3253.27	1398.33	3857.15	-1.46388	2.23079e-05	0.000633182	cla-1	IV	7588931	7628234	+	27429	protein_coding	CLArinet, functional homolog of cytomatrix at the active zone proteins piccolo and fife [Source:RefSeq peptide;Acc:NP_001294143]	-
WBGene00006640	303.962	297.746	399.747	688.972	744.648	768.561	333.818	734.06	-1.13655	2.23471e-05	0.000633218	tsp-14	X	4866684	4874657	-	2034	protein_coding	Tetraspanin-14 [Source:UniProtKB/Swiss-Prot;Acc:H2L006]	-
WBGene00016129	145.826	87.1219	110.371	239.885	327.561	558.746	114.44	375.397	-1.7128	2.29136e-05	0.000647226	C26B2.7	IV	8016153	8016882	+	626	protein_coding	-	-
WBGene00004985	82.3822	77.5481	116.863	22.3149	21.065	19.3851	92.2646	20.9217	2.13935	2.29189e-05	0.000647226	spo-11	IV	11123133	11124862	-	1433	protein_coding	Meiotic recombination protein spo-11 [Source:UniProtKB/Swiss-Prot;Acc:Q22236]	-
WBGene00011898	138.251	323.596	519.393	89.2595	66.3548	90.0835	327.08	81.8993	1.99774	2.30365e-05	0.000649451	T21C9.13	V	10597266	10598666	+	1259	protein_coding	-	-
WBGene00010723	385.397	452.843	502.698	174.8	115.858	213.236	446.979	167.964	1.41272	2.3154e-05	0.000651664	cpg-7	II	14108016	14109635	-	954	protein_coding	Chondroitin proteoglycan 7 [Source:UniProtKB/Swiss-Prot;Acc:Q7YWX9]	-
WBGene00008334	512.285	539.965	715.093	244.534	150.615	274.812	589.114	223.32	1.3997	2.35066e-05	0.000660476	sdz-8	V	11515084	11516191	-	835	protein_coding	SKN-1 Dependent Zygotic transcript [Source:UniProtKB/TrEMBL;Acc:P90780]	-
WBGene00019537	9905.75	8411.57	8741.57	14253.6	20749	24005.5	9019.63	19669.4	-1.12479	2.35667e-05	0.000661054	K08D12.3	IV	1710265	1711127	+	863	protein_coding	-	-
WBGene00018948	134.463	189.562	321.838	63.2255	64.2483	53.594	215.288	60.3559	1.83401	2.36245e-05	0.000661565	F56C9.3	III	7311290	7313195	+	1660	protein_coding	-	-
WBGene00021464	184.65	182.86	139.123	65.0851	37.917	49.0328	168.878	50.6783	1.73361	2.37523e-05	0.000663877	ugt-31	I	2333312	2338693	+	1673	protein_coding	UDP-GlucuronosylTransferase [Source:UniProtKB/TrEMBL;Acc:Q86S61]	-
WBGene00020157	141.091	211.582	148.398	53.9276	49.5028	20.5254	167.024	41.3186	2.00965	2.37865e-05	0.000663877	T02B11.6	V	884881	889274	-	1457	protein_coding	-	-
WBGene00011168	39.7707	68.9316	47.3019	7.43829	4.213	0	52.0014	3.88377	3.70753	2.39705e-05	0.000667898	R09D1.12	II	9450028	9452263	-	1368	protein_coding	-	-
WBGene00002032	121.206	222.113	326.476	42.7702	69.5146	62.7164	223.265	58.3337	1.93855	2.46415e-05	0.000685453	htp-1	IV	5390184	5391557	-	1234	protein_coding	Him-Three Paralog [Source:UniProtKB/TrEMBL;Acc:Q20305]	-
WBGene00002879	1580.41	1679.25	1841.99	3158.48	3357.76	3159.77	1700.55	3225.34	-0.92343	2.47608e-05	0.000687586	let-754	III	7949975	7951915	-	1104	protein_coding	Adenylate kinase [Source:UniProtKB/Swiss-Prot;Acc:P34346]	-
WBGene00018891	788.786	763.035	817.117	1789.84	1775.78	1323.89	789.646	1629.84	-1.04563	2.48005e-05	0.000687586	F55F8.3	I	5649756	5653648	-	3012	protein_coding	Periodic tryptophan protein 2 homolog [Source:UniProtKB/Swiss-Prot;Acc:P91341]	-
WBGene00004315	937.452	894.197	826.392	1801	2378.24	1545.1	886.014	1908.11	-1.10681	2.48638e-05	0.0006882	rbd-1	IV	12724948	12730095	+	2783	protein_coding	RBD (RNA binding domain) protein [Source:UniProtKB/TrEMBL;Acc:Q9XU67]	-
WBGene00008780	2188.34	1823.82	2285.33	863.772	681.453	1191.61	2099.16	912.279	1.20257	2.52924e-05	0.000698906	hxk-1	I	9271443	9278689	-	2137	protein_coding	Phosphotransferase [Source:UniProtKB/TrEMBL;Acc:Q19440]	-
WBGene00003865	461.151	893.239	1072.18	197.115	146.402	369.456	808.855	237.658	1.76811	2.55082e-05	0.000703706	oma-2	V	8029439	8031214	+	1546	protein_coding	CCCH-type zinc finger protein oma-2 [Source:UniProtKB/Swiss-Prot;Acc:Q23359]	-
WBGene00018665	29.3546	23.9346	58.4317	2.78936	0	0	37.2403	0.929786	5.22532	2.55563e-05	0.000703871	bath-4	II	1916713	1917958	-	1012	protein_coding	BTB and MATH domain containing [Source:UniProtKB/TrEMBL;Acc:O44815]	-
WBGene00013719	427.062	715.166	1045.28	286.374	263.313	173.325	729.169	241.004	1.59635	2.56494e-05	0.000705273	Y106G6H.6	I	10443668	10446133	-	1517	protein_coding	-	-
WBGene00000704	124.994	379.124	454.469	109.715	49.5028	54.7343	319.529	71.3173	2.16068	2.57886e-05	0.000707938	col-130	IV	12427506	12428522	-	965	protein_coding	COLlagen [Source:UniProtKB/TrEMBL;Acc:Q19218]	-
WBGene00016822	11.3631	48.8266	64.9241	2.78936	0	0	41.7046	0.929786	5.39274	2.61662e-05	0.000717127	C50E3.11	V	7602213	7603486	-	844	protein_coding	-	-
WBGene00013865	21.7792	25.8494	39.882	0	1.05325	0	29.1702	0.351084	6.29444	2.6224e-05	0.000717533	ZC334.7	I	14009871	14011521	+	714	protein_coding	-	-
WBGene00000168	160.03	210.624	299.579	66.9446	57.9288	13.6836	223.411	46.1857	2.26875	2.64296e-05	0.000721978	apx-1	V	3210189	3223218	+	2771	protein_coding	Anterior pharynx in excess protein 1 [Source:UniProtKB/Swiss-Prot;Acc:P41990]	-
WBGene00008639	231.996	268.067	247.639	490.927	547.691	592.955	249.234	543.858	-1.12541	2.70771e-05	0.000737746	F10B5.2	II	8144762	8147236	+	1199	protein_coding	-	-
WBGene00020091	150.561	230.73	362.648	45.5595	38.9703	96.9253	247.979	60.485	2.03941	2.71141e-05	0.000737746	rnp-8	I	364510	368319	+	2140	protein_coding	RNP (RRM RNA binding domain) containing [Source:UniProtKB/TrEMBL;Acc:V6CLS0]	-
WBGene00011010	117.418	216.369	383.98	69.734	16.852	5.70149	239.256	30.7625	2.94987	2.71529e-05	0.000737746	R04D3.2	X	13285122	13286633	-	1369	protein_coding	-	-
WBGene00017482	394.866	530.391	571.332	227.798	176.946	93.5044	498.863	166.083	1.58445	2.71834e-05	0.000737746	set-9	IV	4307896	4317140	+	5449	protein_coding	Histone-lysine N-methyltransferase set-9 [Source:UniProtKB/Swiss-Prot;Acc:O44498]	-
WBGene00007765	229.155	286.258	209.612	101.347	87.4198	69.5582	241.675	86.1082	1.48647	2.74104e-05	0.000742702	C27B7.9	IV	8915472	8916110	-	404	protein_coding	-	-
WBGene00022586	137.304	261.366	434.064	92.9786	17.9053	42.191	277.578	51.025	2.43934	2.75254e-05	0.00074461	ZC308.4	I	6368270	6369598	+	1128	protein_coding	-	-
WBGene00013574	133.516	159.883	136.341	386.791	339.147	306.74	143.247	344.226	-1.2655	2.84388e-05	0.000768077	lron-13	III	13527438	13539971	+	2434	protein_coding	ELRR (Extracellular Leucine-Rich Repeat) ONly [Source:UniProtKB/TrEMBL;Acc:Q9XWD2]	-
WBGene00008546	1693.1	1704.14	1711.21	927.927	755.181	917.94	1702.82	867.016	0.973744	2.86563e-05	0.000772703	gfat-1	II	11592392	11596590	-	2571	protein_coding	Glutamine-Fructose 6-phosphate AminoTransferase homolog [Source:UniProtKB/TrEMBL;Acc:Q95QM8]	-
WBGene00006311	143.932	289.13	402.53	72.5233	56.8756	98.0656	278.531	75.8215	1.87855	2.9301e-05	0.000788815	sun-1	V	13191707	13193538	-	1652	protein_coding	Sun domain-containing protein 1 [Source:UniProtKB/Swiss-Prot;Acc:Q20924]	-
WBGene00020612	167.605	103.397	159.528	326.355	352.839	483.486	143.51	387.56	-1.43246	2.95356e-05	0.000793852	arrd-22	V	3410520	3412858	+	1520	protein_coding	ARRestin Domain protein [Source:UniProtKB/TrEMBL;Acc:P91469]	-
WBGene00001243	595.614	680.7	642.749	1138.06	1612.53	1282.83	639.688	1344.47	-1.0715	2.96056e-05	0.000794362	elo-5	IV	5374598	5377137	-	960	protein_coding	Elongation of very long chain fatty acids protein 5 [Source:UniProtKB/Swiss-Prot;Acc:Q20300]	-
WBGene00016249	527.435	443.269	460.961	871.21	1014.28	1709.31	477.222	1198.27	-1.32782	2.96649e-05	0.000794362	mrpl-32	III	8449757	8450519	+	666	protein_coding	Probable 39S ribosomal protein L32, mitochondrial [Source:UniProtKB/Swiss-Prot;Acc:Q04907]	-
WBGene00015400	1557.69	1103.86	1037.86	563.451	535.052	267.97	1233.14	455.491	1.43603	2.96971e-05	0.000794362	cyp-35A2	V	7362319	7364204	-	1610	protein_coding	CYtochrome P450 family [Source:UniProtKB/TrEMBL;Acc:O02628]	-
WBGene00021585	129.728	35.4232	43.5919	0	9.47926	0	69.5811	3.15975	4.46754	3.04197e-05	0.000812391	clec-74	IV	3957005	3960139	+	1429	protein_coding	C-type LECtin [Source:UniProtKB/TrEMBL;Acc:Q9N3W1]	-
WBGene00004101	740.493	694.103	490.641	1460.69	1256.53	1456.16	641.746	1391.13	-1.11627	3.05629e-05	0.000814913	hgrs-1	IV	8201378	8206048	-	2591	protein_coding	Hepatocyte Growth factor-Regulated TK Substrate (HRS) family [Source:UniProtKB/TrEMBL;Acc:Q17796]	-
WBGene00009741	484.824	509.328	405.312	236.166	188.532	159.642	466.488	194.78	1.2584	3.10534e-05	0.000826673	drr-1	II	13495050	13495900	-	699	protein_coding	Dietary Restriction Response (WT but not eat-2 lifespan increased) [Source:UniProtKB/TrEMBL;Acc:O02268]	-
WBGene00002125	540.692	853.986	1175.13	322.636	210.65	370.597	856.602	301.294	1.50768	3.14697e-05	0.00083642	inx-3	X	5996156	5998243	+	1633	protein_coding	Innexin-3 [Source:UniProtKB/Swiss-Prot;Acc:Q19746]	-
WBGene00015197	703.563	850.157	905.228	441.649	317.029	237.182	819.649	331.953	1.30271	3.15196e-05	0.00083642	B0454.6	II	3032780	3036122	+	1976	protein_coding	-	-
WBGene00020684	224.42	398.272	643.676	103.206	17.9053	118.591	422.123	79.9008	2.40157	3.18239e-05	0.000842912	T22D1.5	IV	6903950	6905546	+	1351	protein_coding	-	-
WBGene00010659	401.495	224.028	165.093	76.2425	37.917	5.70149	263.538	39.9537	2.71455	3.18651e-05	0.000842912	K08D8.5	IV	12910647	12912145	-	1084	protein_coding	-	-
WBGene00001564	125225	157597	111481	64485.3	51901.1	22453.6	131434	46280	1.50587	3.20514e-05	0.000846502	icl-1	V	724207	728103	-	3355	protein_coding	Bifunctional glyoxylate cycle protein Isocitrate lyase Malate synthase [Source:UniProtKB/Swiss-Prot;Acc:Q10663]	-
WBGene00008476	617.393	1063.65	928.415	431.421	330.721	269.11	869.821	343.751	1.33842	3.21234e-05	0.000847064	E03H4.8	I	12424555	12426850	-	1555	protein_coding	-	-
WBGene00008215	1326.64	1484.9	1574.87	2535.53	2843.78	3666.06	1462.14	3015.12	-1.04399	3.24695e-05	0.000854842	C49F8.3	X	13386057	13387547	-	703	protein_coding	-	-
WBGene00003184	141.091	246.048	508.263	86.4701	21.065	67.2776	298.467	58.2709	2.35522	3.25622e-05	0.000855934	mei-2	I	6564749	6565868	-	980	protein_coding	Meiotic spindle formation protein 2 [Source:UniProtKB/Swiss-Prot;Acc:O44740]	-
WBGene00011307	73.8599	73.7186	109.444	176.659	261.206	418.489	85.674	285.452	-1.73481	3.28121e-05	0.000861151	mpst-7	V	12955203	12961149	-	1370	protein_coding	MercaptoPyruvate SulfurTransferase homolog [Source:UniProtKB/TrEMBL;Acc:G5EEV0]	-
WBGene00001214	250.934	398.272	597.302	162.713	120.071	59.2955	415.503	114.026	1.86289	3.31668e-05	0.000869095	ego-1	I	7650418	7656336	-	5212	protein_coding	Enhancer of Glp-One (Glp-1); RNA-directed RNA polymerase related EGO-1 [Source:UniProtKB/TrEMBL;Acc:G5EBQ3]	-
WBGene00006572	410.964	398.272	380.27	694.55	879.465	1376.34	396.502	983.451	-1.31005	3.38001e-05	0.000884304	tin-9.1	IV	7044058	7044602	-	342	protein_coding	Mitochondrial import inner membrane translocase subunit Tim9 [Source:UniProtKB/Swiss-Prot;Acc:Q17754]	-
WBGene00007331	2872.01	9350.77	7903.12	26158.6	27394	13165.9	6708.63	22239.5	-1.72904	3.42206e-05	0.000892589	pho-11	II	9931845	9934443	+	1339	protein_coding	Putative acid phosphatase 11 [Source:UniProtKB/Swiss-Prot;Acc:Q09451]	-
WBGene00001365	517.019	449.97	358.01	1059.96	888.944	914.519	441.667	954.473	-1.112	3.42291e-05	0.000892589	exc-4	I	14511431	14518719	-	2109	protein_coding	Chloride intracellular channel exc-4 [Source:UniProtKB/Swiss-Prot;Acc:Q8WQA4]	-
WBGene00016596	718.714	1707.02	1942.16	667.587	299.123	339.809	1455.96	435.506	1.74049	3.42936e-05	0.000892589	C42D4.3	IV	7179239	7180484	+	944	protein_coding	-	-
WBGene00007097	432.743	838.668	1046.21	335.653	129.55	224.639	772.539	229.947	1.74739	3.43304e-05	0.000892589	B0024.4	V	10297399	10298865	+	1233	protein_coding	-	-
WBGene00022789	179.915	334.127	345.025	105.996	32.6508	80.9611	286.356	73.2025	1.96605	3.47223e-05	0.000901378	lron-2	V	9284129	9287617	-	2162	protein_coding	ELRR (Extracellular Leucine-Rich Repeat) ONly [Source:UniProtKB/TrEMBL;Acc:Q23580]	-
WBGene00004352	21.7792	53.6135	135.413	9.29786	4.213	0	70.2686	4.50362	3.934	3.49551e-05	0.000906014	rgs-9	X	1915258	1917162	+	1001	protein_coding	Regulator of G-protein signaling rgs-9 [Source:UniProtKB/Swiss-Prot;Acc:Q23376]	-
WBGene00021002	1262.25	1541.39	1758.52	754.987	551.904	262.268	1520.72	523.053	1.53883	3.50405e-05	0.000906823	W03F9.4	V	147538	152104	-	3100	protein_coding	-	-
WBGene00219886	162.871	129.247	77.909	26.9638	36.8638	27.3671	123.342	30.3982	2.0209	3.51192e-05	0.000907454	F09E10.15	X	1506302	1506390	+	89	ncRNA	-	-
WBGene00010836	32.1953	67.9743	45.4469	6.50851	0	0	48.5388	2.1695	4.41634	3.70702e-05	0.000956388	M03B6.4	X	13858841	13861066	+	1381	protein_coding	-	-
WBGene00022410	2837.92	2019.12	1757.59	4042.71	4828.1	6098.31	2204.88	4989.71	-1.1782	3.71737e-05	0.000957582	Y97E10C.1	V	7728813	7730317	+	1197	protein_coding	-	-
WBGene00009246	1950.66	1655.32	1687.1	3276.57	3875.96	3115.29	1764.36	3422.61	-0.955963	3.82857e-05	0.000984708	gfm-1	II	13117483	13122085	+	2478	protein_coding	Elongation factor G, mitochondrial [Source:UniProtKB/Swiss-Prot;Acc:Q9XV52]	-
WBGene00014254	403.389	717.081	956.24	298.461	231.715	196.131	692.236	242.103	1.51479	3.90583e-05	0.00100304	cyp-13A10	II	9660839	9663007	-	1803	protein_coding	Putative cytochrome P450 CYP13A10 [Source:UniProtKB/Swiss-Prot;Acc:Q09653]	-
WBGene00017315	89.9576	86.1646	129.848	8.36808	17.9053	31.9283	101.99	19.4006	2.40618	3.99131e-05	0.00102342	ugt-36	V	7167009	7169281	+	1678	protein_coding	UDP-GlucuronosylTransferase [Source:UniProtKB/TrEMBL;Acc:O17401]	-
WBGene00008399	222.527	325.511	402.53	110.645	108.485	129.994	316.856	116.374	1.44586	4.01223e-05	0.0010272	D2005.4	I	7814972	7819410	+	3484	protein_coding	-	-
WBGene00000935	231.996	259.451	401.602	119.013	102.165	53.594	297.683	91.5907	1.69761	4.03184e-05	0.00103065	daz-1	II	5456305	5458609	+	1991	protein_coding	DAZ protein 1 [Source:UniProtKB/Swiss-Prot;Acc:Q20870]	-
WBGene00007999	126.888	344.658	383.052	79.0318	37.917	91.2238	284.866	69.3909	2.03788	4.09912e-05	0.00104625	tag-297	II	14627630	14630121	+	1940	protein_coding	-	-
WBGene00006220	567.206	470.075	532.378	266.849	225.396	230.34	523.22	240.862	1.11861	4.11144e-05	0.0010473	str-176	IV	8460999	8463816	-	1664	protein_coding	Seven TM Receptor [Source:UniProtKB/TrEMBL;Acc:X5M5X9]	-
WBGene00010183	8.5223	43.0823	15.7673	0	0	0	22.4573	0	6.87839	4.11579e-05	0.0010473	fipr-13	V	10064503	10064939	+	389	protein_coding	FIP (Fungus-Induced Protein) Related [Source:UniProtKB/TrEMBL;Acc:Q7YX01]	-
WBGene00007277	67.2314	159.883	253.204	21.3851	28.4378	46.7522	160.106	32.1917	2.3194	4.14231e-05	0.00105245	asfl-1	I	9658274	9660080	+	991	protein_coding	Probable histone chaperone asf-1-like protein [Source:UniProtKB/Swiss-Prot;Acc:Q17603]	-
WBGene00000213	259.457	245.09	239.292	558.802	817.323	448.137	247.946	608.087	-1.29441	4.14906e-05	0.00105256	asm-3	IV	520214	523809	-	1912	protein_coding	Putative sphingomyelin phosphodiesterase asm-3 [Source:UniProtKB/Swiss-Prot;Acc:Q9UAY4]	-
WBGene00003585	183.703	129.247	163.238	60.4361	31.5975	47.8925	158.729	46.6421	1.7644	4.16123e-05	0.00105405	ndx-8	I	13503045	13507064	+	798	protein_coding	Peroxisomal coenzyme A diphosphatase ndx-8 [Source:UniProtKB/Swiss-Prot;Acc:Q9NA25]	-
WBGene00017993	2923.15	3564.34	3958.52	6425.75	7047.3	6693.55	3482	6722.2	-0.948999	4.17847e-05	0.00105682	cec-5	IV	7578501	7580269	-	1538	protein_coding	C.Elegans Chromodomain protein; Chromodomain protein [Source:UniProtKB/TrEMBL;Acc:Q19973]	-
WBGene00005018	1331.37	2291.02	3157.17	1020.91	189.585	432.173	2259.85	547.555	2.04455	4.19805e-05	0.00106017	sqt-3	V	12352994	12354314	+	1167	protein_coding	Cuticle collagen 1 [Source:UniProtKB/Swiss-Prot;Acc:P08124]	-
WBGene00017756	1349.36	1504.05	1021.16	374.704	308.603	720.668	1291.53	467.992	1.46529	4.21709e-05	0.00106337	F23F12.12	III	6508132	6509499	+	972	protein_coding	-	-
WBGene00018446	93.7452	162.755	233.727	51.1383	9.47926	28.5074	163.409	29.7083	2.45414	4.25313e-05	0.00107084	ceh-83	II	1733718	1736533	-	1869	protein_coding	C. Elegans Homeobox [Source:UniProtKB/TrEMBL;Acc:O16749]	Homeobox
WBGene00000512	360.777	328.383	390.472	158.993	75.8341	148.239	359.877	127.689	1.49428	4.27294e-05	0.00107421	ckb-2	III	4367832	4370160	+	1315	protein_coding	Choline kinase B2 [Source:UniProtKB/Swiss-Prot;Acc:P46559]	-
WBGene00016411	231.996	153.181	230.017	427.702	548.744	497.17	205.065	491.205	-1.25983	4.30024e-05	0.00107945	C34E10.10	III	5226818	5227884	-	973	protein_coding	-	-
WBGene00020168	98.4799	117.758	182.715	31.6127	36.8638	7.98208	132.984	25.4862	2.3772	4.31348e-05	0.00108115	mct-5	II	7096349	7098593	-	1978	protein_coding	MonoCarboxylate Transporter family [Source:UniProtKB/TrEMBL;Acc:Q22109]	-
WBGene00013324	366.459	346.573	370.068	641.553	766.767	874.608	361.033	760.976	-1.07528	4.32716e-05	0.00108296	mrps-7	IV	14766773	14767730	-	771	protein_coding	28S ribosomal protein S7, mitochondrial [Source:UniProtKB/Swiss-Prot;Acc:Q95Q11]	-
WBGene00017781	489.559	668.254	635.329	292.883	275.952	204.113	597.714	257.649	1.21304	4.36357e-05	0.00109044	F25E2.3	X	811173	813163	-	1127	protein_coding	-	-
WBGene00011857	535.011	436.567	422.007	814.493	1050.09	1117.49	464.528	994.025	-1.09723	4.38895e-05	0.00109514	coa-4	IV	9333342	9335525	-	1063	protein_coding	Cytochrome Oxidase Assembly subunits [Source:UniProtKB/TrEMBL;Acc:O01255]	-
WBGene00020171	1183.65	1096.2	1227.99	2115.26	2707.91	2087.89	1169.28	2303.69	-0.978293	4.39656e-05	0.00109541	T02H6.1	II	709381	723699	+	1860	protein_coding	-	-
WBGene00003395	342.786	791.756	1038.79	272.427	169.573	239.463	724.443	227.154	1.67289	4.40907e-05	0.00109689	mom-2	V	8355953	8358185	+	1572	protein_coding	-	-
WBGene00017909	152.454	127.332	171.585	37.1915	60.0353	39.9104	150.457	45.7124	1.71978	4.41973e-05	0.00109791	F28H1.4	I	3974063	3977351	-	1012	protein_coding	-	-
WBGene00021763	494.293	901.856	1531.28	260.34	312.816	377.439	975.81	316.865	1.62329	4.42871e-05	0.0010985	Y51F10.2	I	1977993	1983436	+	1126	protein_coding	-	-
WBGene00016970	115.524	128.289	242.074	450.017	505.56	404.806	161.963	453.461	-1.48505	4.46715e-05	0.0011064	C56E6.2	II	6503360	6526333	+	1178	protein_coding	-	-
WBGene00012845	140.144	159.883	178.078	44.6297	62.1418	23.9463	159.368	43.5726	1.86806	4.51927e-05	0.00111705	set-24	II	12114971	12130968	-	2820	protein_coding	SET (Trithorax/polycomb) domain containing [Source:UniProtKB/TrEMBL;Acc:Q9U2G8]	-
WBGene00001566	318.166	283.386	366.358	638.763	669.868	728.65	322.636	679.094	-1.07339	4.52351e-05	0.00111705	acdh-13	IV	8496486	8498871	-	2056	protein_coding	Acyl CoA DeHydrogenase [Source:UniProtKB/TrEMBL;Acc:H2KYN3]	-
WBGene00016291	112.684	179.031	306.998	50.2085	34.7573	67.2776	199.571	50.7478	1.97723	4.55567e-05	0.00112333	C31H1.8	IV	5811583	5814142	-	1971	protein_coding	-	-
WBGene00010049	5318.86	4826.17	4529.85	2172.91	2985.97	2135.78	4891.63	2431.55	1.00845	4.56745e-05	0.00112458	F54D5.3	II	11571805	11573025	+	617	protein_coding	-	-
WBGene00003415	3193.97	3120.11	3351.94	6356.95	6176.26	5328.61	3222.01	5953.94	-0.885922	4.74041e-05	0.00116506	mars-1	IV	11631941	11635487	-	3170	protein_coding	Methionine--tRNA ligase, cytoplasmic [Source:UniProtKB/Swiss-Prot;Acc:Q20970]	-
WBGene00002266	3450.58	2723.76	2370.66	4882.31	6000.37	7996.91	2848.33	6293.2	-1.14361	4.74581e-05	0.00116506	lec-3	II	9991160	10000350	+	2237	protein_coding	32 kDa beta-galactoside-binding lectin lec-3 [Source:UniProtKB/Swiss-Prot;Acc:Q09581]	-
WBGene00020868	3083.18	2785.99	2888.2	4752.14	5681.24	6407.33	2919.12	5613.57	-0.943315	4.8289e-05	0.00118372	eif-1	II	4990831	4993580	-	582	protein_coding	Eukaryotic Initiation Factor [Source:UniProtKB/TrEMBL;Acc:Q967F1]	-
WBGene00012825	1160.93	1423.63	1010.96	679.674	341.253	412.788	1198.51	477.905	1.32558	4.89882e-05	0.0011991	Y43F8C.3	V	19614558	19622551	-	2555	protein_coding	-	-
WBGene00019660	392.972	277.641	468.381	173.87	130.603	80.9611	379.665	128.478	1.5607	4.93214e-05	0.00120536	K11H12.4	IV	674036	675883	-	1292	protein_coding	-	-
WBGene00020379	949.762	651.021	914.503	1879.1	2168.64	1470.98	838.429	1839.58	-1.13367	4.93882e-05	0.00120536	T09B4.5	I	6154075	6157438	+	1694	protein_coding	-	-
WBGene00013263	1045.4	1120.14	1473.78	2133.86	2525.7	3106.17	1213.11	2588.58	-1.09328	5.0263e-05	0.00122492	txdc-12.1	II	12240388	12242567	+	687	protein_coding	ThioredoXin Domain Containing protein homolog [Source:UniProtKB/TrEMBL;Acc:Q9NA78]	-
WBGene00018298	1001.84	952.597	743.845	273.357	321.242	507.433	899.428	367.344	1.29299	5.06785e-05	0.00123325	nlp-50	II	6765034	6765888	+	421	protein_coding	Neuropeptide-Like Protein [Source:UniProtKB/TrEMBL;Acc:Q20295]	-
WBGene00011262	297.333	204.88	220.742	83.6808	63.1951	106.048	240.985	84.3078	1.51646	5.0813e-05	0.00123473	pho-8	V	11833629	11835708	+	1282	protein_coding	Intestinal acid PHOsphatase [Source:UniProtKB/TrEMBL;Acc:P90949]	-
WBGene00019600	125.941	193.392	282.884	77.1723	22.1183	18.2448	200.739	39.1784	2.34925	5.13665e-05	0.00124636	rga-3	V	5717885	5722089	+	3784	protein_coding	Rho GTPase Activating protein [Source:UniProtKB/TrEMBL;Acc:O01585]	-
WBGene00000986	525.542	265.195	328.331	77.1723	112.698	166.483	373.023	118.785	1.65349	5.19518e-05	0.00125874	dhs-23	V	15381097	15382305	+	1089	protein_coding	DeHydrogenases, Short chain [Source:UniProtKB/TrEMBL;Acc:O45709]	-
WBGene00006423	1459.21	790.799	767.032	3163.13	2944.89	1794.83	1005.68	2634.28	-1.38937	5.21369e-05	0.0012614	asd-2	I	6877080	6888217	-	2921	protein_coding	RNA-binding protein asd-2 [Source:UniProtKB/Swiss-Prot;Acc:G5EFF1]	-
WBGene00004086	211.164	330.297	496.206	133.889	110.591	57.0149	345.889	100.498	1.78061	5.24676e-05	0.00126756	pph-4.2	III	12374126	12377248	-	1326	protein_coding	Serine/threonine-protein phosphatase 4 catalytic subunit 2 [Source:UniProtKB/Swiss-Prot;Acc:Q9XTT8]	-
WBGene00011464	403.389	660.595	1161.21	206.413	246.461	287.355	741.733	246.743	1.58856	5.28265e-05	0.00127439	T05B9.1	II	11260087	11261256	-	1067	protein_coding	-	-
WBGene00001606	192.225	379.124	643.676	93.9084	32.6508	141.397	405.009	89.3187	2.18209	5.31385e-05	0.00127992	gln-5	IV	17272231	17273652	-	1280	protein_coding	GLutamiNe synthetase (Glutamate-ammonia ligase) [Source:UniProtKB/TrEMBL;Acc:Q9XVU2]	-
WBGene00011045	1856.91	2448.99	2341.91	1202.21	922.648	532.519	2215.94	885.794	1.32232	5.32086e-05	0.00127992	gpx-2	II	14866716	14869577	+	1113	protein_coding	Glutathione peroxidase 2 [Source:UniProtKB/Swiss-Prot;Acc:O62327]	-
WBGene00019005	396.76	347.53	486.004	701.989	961.618	1322.75	410.098	995.451	-1.27886	5.35381e-05	0.00128599	F57B10.8	I	6548644	6550447	-	1061	protein_coding	-	-
WBGene00003784	214.004	443.269	940.473	133.889	85.3133	179.027	532.582	132.743	2.00504	5.40154e-05	0.00129559	nos-2	II	7065618	7067051	+	1242	protein_coding	NanOS related [Source:UniProtKB/TrEMBL;Acc:Q23406]	-
WBGene00000211	423.274	425.078	335.751	184.098	174.84	165.343	394.701	174.76	1.17481	5.48424e-05	0.00131355	asm-1	II	6910031	6912697	+	1869	protein_coding	Sphingomyelin phosphodiesterase 1 [Source:UniProtKB/Swiss-Prot;Acc:Q10916]	-
WBGene00002066	4002.64	3696.46	3392.75	7627.97	8639.82	5857.71	3697.28	7375.17	-0.996248	5.52526e-05	0.00132148	ifg-1	II	8217231	8222395	+	4661	protein_coding	Initiation Factor 4G (eIF4G) family [Source:UniProtKB/TrEMBL;Acc:B5BM23]	-
WBGene00011575	160.03	171.372	128.921	310.549	364.425	421.91	153.441	365.628	-1.25227	5.63747e-05	0.00134639	madf-4	V	9960747	9962494	-	1135	protein_coding	MADF domain transcription factor [Source:UniProtKB/TrEMBL;Acc:G5EGG9]	-
WBGene00001075	1380.61	2857.79	3398.31	1219.88	295.964	267.97	2545.57	594.604	2.09726	5.64638e-05	0.00134659	dpy-14	I	6843589	6845134	+	1045	protein_coding	COLlagen structural; DumPY: shorter than wild-type [Source:UniProtKB/TrEMBL;Acc:G5EEB6]	-
WBGene00016460	37.8769	52.6561	79.7639	5.57872	9.47926	0	56.7656	5.01933	3.485	5.67921e-05	0.00135249	C35E7.8	I	10808590	10810497	+	1282	protein_coding	-	-
WBGene00006539	413.805	827.18	808.769	291.023	124.284	254.286	683.251	223.198	1.61363	5.73231e-05	0.0013621	tbb-6	V	12261804	12263368	+	1388	protein_coding	Tubulin beta chain [Source:UniProtKB/TrEMBL;Acc:G5EF01]	-
WBGene00003691	652.429	686.444	604.722	354.249	292.804	229.2	647.865	292.084	1.14804	5.74929e-05	0.0013621	nhr-101	V	11570400	11572370	+	1300	protein_coding	Nuclear Hormone Receptor family [Source:UniProtKB/TrEMBL;Acc:Q95ZS3]	RXR-like
WBGene00004432	33515.3	29229.9	27075.2	48745.9	59698.3	88662.7	29940.2	65702.3	-1.13386	5.751e-05	0.0013621	rpl-20	IV	4749012	4749778	-	719	protein_coding	60S ribosomal protein L18a [Source:UniProtKB/Swiss-Prot;Acc:O44480]	-
WBGene00019645	1118.31	909.515	972.007	512.312	492.921	516.555	999.945	507.263	0.979128	5.75212e-05	0.0013621	swt-7	V	5029324	5030811	-	800	protein_coding	Sugar transporter SWEET [Source:UniProtKB/TrEMBL;Acc:O44620]	-
WBGene00077593	76.7007	202.965	158.6	48.3489	21.065	29.6477	146.089	33.0206	2.1409	5.85689e-05	0.00138494	C49G7.12	V	4038821	4039934	+	936	protein_coding	-	-
WBGene00010281	173.287	271.897	425.717	106.925	63.1951	95.785	290.3	88.6352	1.71097	6.04335e-05	0.0014255	F58G11.3	V	13669353	13671958	-	2280	protein_coding	-	-
WBGene00010435	2162.77	2114.86	2046.04	3426.26	4239.34	4124.46	2107.89	3930.02	-0.898673	6.04545e-05	0.0014255	JC8.2	IV	13232943	13236585	-	1602	protein_coding	-	-
WBGene00010232	4031.05	4400.14	4454.72	2493.69	2271.86	1663.69	4295.3	2143.08	1.00288	6.071e-05	0.00142951	F58B3.6	IV	11636648	11638208	+	1452	protein_coding	-	-
WBGene00019029	17.0446	18.1903	25.0422	94.8382	85.3133	71.8388	20.0924	83.9968	-2.06396	6.10659e-05	0.00143586	F58B6.1	III	1112279	1116374	-	1033	protein_coding	-	-
WBGene00012781	17.9915	21.0624	17.6223	0	0	0	18.8921	0	6.62924	6.14685e-05	0.0014433	nspd-7	IV	10268882	10269228	-	347	protein_coding	Nematode Specific Peptide family, group D [Source:UniProtKB/TrEMBL;Acc:Q9XXF2]	-
WBGene00011128	5644.6	5108.6	5308.94	8726.98	11241.3	9954.8	5354.05	9974.37	-0.897576	6.19508e-05	0.00145259	R07H5.8	IV	11209309	11210831	-	1277	protein_coding	-	-
WBGene00019002	188.437	304.448	396.965	95.768	56.8756	122.012	296.617	91.5518	1.69692	6.3536e-05	0.00148767	F57B10.4	I	6566173	6568905	+	2215	protein_coding	-	-
WBGene00012435	331.423	537.092	664.081	231.517	184.319	116.31	510.865	177.382	1.52442	6.37123e-05	0.00148971	flh-1	IV	9261808	9264265	-	1852	protein_coding	FLYWCH zinc finger transcription factor homolog [Source:UniProtKB/TrEMBL;Acc:Q9XWR1]	-
WBGene00012261	222.527	317.851	446.122	152.485	69.5146	55.8746	328.833	92.6247	1.82412	6.39963e-05	0.00149426	lpr-3	X	11057401	11059794	+	2067	protein_coding	LiPocalin-Related protein [Source:UniProtKB/TrEMBL;Acc:G5EEA2]	-
WBGene00019184	103.214	319.766	353.373	85.5404	17.9053	49.0328	258.784	50.8261	2.34491	6.45085e-05	0.00150412	H10E21.4	III	17316	19675	-	928	protein_coding	-	-
WBGene00020263	713.979	724.74	585.245	1386.31	1732.6	1147.14	674.654	1422.02	-1.07585	6.48235e-05	0.00150936	let-355	I	5472321	5479438	-	2887	protein_coding	-	-
WBGene00021084	65.3376	118.716	136.341	35.3319	15.7988	13.6836	106.798	21.6047	2.29606	6.58419e-05	0.00153094	W08E12.3	IV	3303980	3304567	+	537	protein_coding	-	-
WBGene00018566	420.433	507.413	571.332	255.691	205.384	212.095	499.726	224.39	1.1544	6.60668e-05	0.00153301	F47E1.2	X	9057652	9061860	+	2404	protein_coding	Solute carrier organic anion transporter family member [Source:UniProtKB/TrEMBL;Acc:Q20538]	-
WBGene00002053	8208.86	7171.76	8226.82	12805	14826.6	19066.9	7869.15	15566.2	-0.984105	6.61145e-05	0.00153301	ifb-1	II	5765618	5772084	+	2297	protein_coding	Intermediate filament protein ifb-1 [Source:UniProtKB/Swiss-Prot;Acc:Q19289]	-
WBGene00018031	131.622	311.15	472.091	74.3829	52.6626	108.328	304.954	78.4579	1.96005	6.63812e-05	0.00153707	F35B3.4	X	17019616	17020958	-	1025	protein_coding	-	-
WBGene00003123	2103.11	2663.44	2930.86	4483.43	4941.85	7042.48	2565.81	5489.25	-1.09711	6.68409e-05	0.00154557	mag-1	I	11912005	11912677	-	602	protein_coding	Protein mago nashi homolog [Source:UniProtKB/Swiss-Prot;Acc:P49029]	-
WBGene00007232	25.5669	19.1477	16.6948	34.4021	84.2601	323.845	20.4698	147.502	-2.84748	6.7143e-05	0.00155041	C01G10.5	V	15089077	15089538	-	292	protein_coding	-	-
WBGene00016655	3057.61	2831.94	2855.73	884.227	1572.5	1521.16	2915.1	1325.96	1.13683	6.78494e-05	0.00156456	acbp-1	I	4635722	4637328	-	470	protein_coding	Acyl-CoA-binding protein homolog 1 [Source:UniProtKB/Swiss-Prot;Acc:O01805]	-
WBGene00012728	524.595	299.661	262.479	121.802	150.615	117.451	362.245	129.956	1.47888	6.89918e-05	0.00158871	Y39G8B.9	II	13981330	13981785	+	402	protein_coding	-	-
WBGene00012899	53.0276	157.968	147.471	23.2447	33.704	17.1045	119.489	24.6844	2.27377	6.91344e-05	0.00158981	Y46G5A.7	II	12755170	12756218	-	953	protein_coding	-	-
WBGene00011353	267.032	261.366	231.872	465.823	651.962	537.08	253.423	551.622	-1.12193	6.95937e-05	0.00159817	T01H8.2	I	8571557	8573749	-	1023	protein_coding	-	-
WBGene00022718	4779.11	5152.64	5138.28	3092.47	2399.31	1937.37	5023.35	2476.38	1.02021	6.99726e-05	0.00160467	ZK370.4	III	8725323	8731373	-	4332	protein_coding	Uncharacterized NTE family protein ZK370.4 [Source:UniProtKB/Swiss-Prot;Acc:Q02331]	-
WBGene00012513	113.631	91.9089	118.718	324.495	215.916	288.495	108.086	276.302	-1.35427	7.09875e-05	0.00162571	Y26E6A.2	X	13910937	13912978	-	1539	protein_coding	-	-
WBGene00019246	993.321	1096.2	1429.26	2063.2	2421.42	2769.78	1172.93	2418.13	-1.04362	7.12026e-05	0.00162841	rpb-5	I	6850409	6851356	+	858	protein_coding	DNA-directed RNA polymerases I, II, and III subunit RPABC1 [Source:UniProtKB/Swiss-Prot;Acc:Q9N5K2]	-
WBGene00010480	3775.38	3219.68	3332.46	2034.37	1814.75	1514.32	3442.51	1787.81	0.945065	7.34661e-05	0.00167788	tasp-1	III	10759290	10763006	+	1559	protein_coding	TASPase homolog [Source:UniProtKB/TrEMBL;Acc:G5EF83]	-
WBGene00023209	4917.36	4547.57	4137.52	7588.92	8428.11	12799.8	4534.15	9605.62	-1.083	7.41264e-05	0.00169065	ZC513.7	V	8039469	8040387	-	646	pseudogene	-	-
WBGene00001239	4934.41	4487.26	4968.55	8815.31	11500.4	7834.99	4796.74	9383.58	-0.96809	7.45508e-05	0.00169801	elo-1	IV	9526359	9528350	+	1092	protein_coding	Elongation of very long chain fatty acids protein [Source:UniProtKB/TrEMBL;Acc:K8ES54]	-
WBGene00007887	9.46922	19.1477	29.6796	0	0	0	19.4322	0	6.67021	7.48085e-05	0.00169933	gadr-2	IV	9482053	9485140	-	2273	protein_coding	-	-
WBGene00011247	441.265	285.3	368.213	675.955	845.761	905.396	364.926	809.037	-1.14824	7.4864e-05	0.00169933	mrpl-49	V	12728631	12729416	+	652	protein_coding	Probable 39S ribosomal protein L49, mitochondrial [Source:UniProtKB/Swiss-Prot;Acc:Q21939]	-
WBGene00010740	801.096	628.044	601.012	278.006	259.1	374.018	676.717	303.708	1.15663	7.49137e-05	0.00169933	K10D3.6	I	7116092	7116889	-	798	protein_coding	-	-
WBGene00022203	231.996	372.422	528.668	109.715	132.71	155.08	377.695	132.502	1.51252	7.72555e-05	0.00174729	Y73B3A.1	X	42728	46924	-	2134	protein_coding	-	-
WBGene00044073	367.406	434.652	433.137	222.219	137.976	108.328	411.732	156.174	1.39591	7.72604e-05	0.00174729	tag-244	IV	1550878	1553119	+	1490	protein_coding	-	-
WBGene00012301	37.8769	60.3152	95.5312	9.29786	9.47926	0	64.5744	6.25904	3.34853	7.74108e-05	0.00174729	W06D11.3	X	12298683	12300022	+	695	protein_coding	-	-
WBGene00020601	509.444	557.197	532.378	995.801	1252.32	945.307	533.006	1064.47	-0.997944	7.74459e-05	0.00174729	T20B12.3	III	7382115	7383906	+	1604	protein_coding	-	-
WBGene00002271	1553.9	1826.69	1723.27	842.387	783.619	1006.88	1701.29	877.629	0.955168	7.77744e-05	0.00175233	lec-8	X	9850209	9851375	+	1055	protein_coding	Probable galaptin lec-8 [Source:UniProtKB/Swiss-Prot;Acc:Q09610]	-
WBGene00020588	953.55	1752.01	2980.02	560.661	442.365	854.083	1895.19	619.037	1.61456	7.80401e-05	0.00175595	T19H12.2	V	4890429	4891422	+	891	protein_coding	Acidic leucine-rich nuclear phosphoprotein 32-related protein 2 [Source:UniProtKB/Swiss-Prot;Acc:O01615]	-
WBGene00020143	1526.44	1551.92	1434.82	549.504	696.199	900.835	1504.39	715.513	1.07277	7.82845e-05	0.00175909	T01C8.2	X	16786438	16787620	+	401	protein_coding	-	-
WBGene00003599	2148.57	2337.93	2174.03	1276.6	1118.55	750.316	2220.18	1048.49	1.08192	7.93272e-05	0.00178012	nhl-3	II	595207	602120	-	2236	protein_coding	NHL (Ring finger b-box coiled coil) domain containing [Source:UniProtKB/TrEMBL;Acc:H2L0K3]	-
WBGene00010044	927.983	939.194	691.906	1331.45	2243.42	2160.86	853.028	1911.91	-1.1642	7.97953e-05	0.00178823	F54C9.9	II	8578049	8581513	+	2349	protein_coding	-	-
WBGene00006705	1179.86	1243.64	981.282	602.502	378.117	183.588	1134.93	388.069	1.54694	8.04386e-05	0.00180023	ubc-8	IV	2704741	2707238	-	833	protein_coding	UBiquitin Conjugating enzyme [Source:UniProtKB/TrEMBL;Acc:Q9N2W9]	-
WBGene00021899	1511.29	1329.81	1324.45	2586.67	3363.03	2322.79	1388.52	2757.49	-0.989842	8.08121e-05	0.00180617	Y54H5A.1	III	5153406	5155465	+	1631	protein_coding	-	-
WBGene00011945	208.323	295.832	407.167	96.6978	131.656	53.594	303.774	93.9827	1.69109	8.11059e-05	0.00180803	alg-5	I	9989802	9993975	+	3104	protein_coding	-	-
WBGene00000216	29319.5	27070	25876	11762.7	15532.3	6178.13	27421.8	11157.7	1.29726	8.11117e-05	0.00180803	asp-3	X	6791064	6792715	+	1468	protein_coding	Aspartic protease 3 [Source:UniProtKB/Swiss-Prot;Acc:P55956]	-
WBGene00012585	742.387	261.366	447.049	121.802	105.325	212.095	483.6	146.408	1.72524	8.13031e-05	0.00180989	lips-15	II	12605968	12607027	+	905	protein_coding	LIPaSe related [Source:UniProtKB/TrEMBL;Acc:Q9NAK4]	-
WBGene00002045	23624.7	21781.4	20257.3	34316.6	42526.1	52251.9	21887.8	43031.5	-0.975255	8.16134e-05	0.00181438	icd-1	II	6587577	6588679	-	915	protein_coding	Transcription factor BTF3 homolog [Source:UniProtKB/Swiss-Prot;Acc:Q18885]	-
WBGene00009130	35.983	98.6105	80.6914	4.64893	14.7455	0	71.7617	6.46482	3.46675	8.19395e-05	0.00181921	F25H5.8	I	9177664	9178703	-	278	protein_coding	-	-
WBGene00003480	232.943	227.857	219.815	383.072	533.998	729.791	226.872	548.954	-1.27405	8.21463e-05	0.00182138	klf-3	II	6618218	6622168	+	1278	protein_coding	Kruppel-Like Factor (Zinc finger protein) [Source:UniProtKB/TrEMBL;Acc:P91329]	zf-C2H2
WBGene00004357	4205.28	3946.34	3956.66	8714.89	8153.22	6222.6	4036.09	7696.9	-0.931371	8.37387e-05	0.00184999	rho-1	IV	16482784	16489021	-	1842	protein_coding	Ras-like GTP-binding protein rhoA [Source:UniProtKB/Swiss-Prot;Acc:Q22038]	-
WBGene00019693	1676.05	1665.85	1815.09	2947.42	3286.14	3089.07	1719	3107.54	-0.854169	8.37536e-05	0.00184999	ostd-1	I	5549137	5550505	-	1224	protein_coding	Dolichyl-diphosphooligosaccharide--protein glycosyltransferase subunit 2 [Source:UniProtKB/Swiss-Prot;Acc:P91390]	-
WBGene00017673	42.6115	67.9743	83.4739	12.0872	7.37276	0	64.6865	6.48666	3.29371	8.37684e-05	0.00184999	icmt-1	I	4901918	4903264	+	1132	protein_coding	Protein-S-isoprenylcysteine O-methyltransferase [Source:UniProtKB/TrEMBL;Acc:P91266]	-
WBGene00003185	1308.65	2044.97	2268.63	993.942	790.992	735.492	1874.08	840.142	1.15719	8.39891e-05	0.00185241	mek-1	X	7479248	7481010	+	1609	protein_coding	Dual specificity mitogen-activated protein kinase kinase mek-1 [Source:UniProtKB/Swiss-Prot;Acc:Q21307]	-
WBGene00009439	1456.37	1839.13	1329.09	825.65	627.738	332.967	1541.53	595.452	1.3715	8.49328e-05	0.00187076	mlcd-1	III	4566279	4568144	-	1492	protein_coding	MaLonyl CoA Decarboxylase [Source:UniProtKB/TrEMBL;Acc:Q20048]	-
WBGene00004446	42370	38843.9	37166.3	64934.4	71674.8	106539	39460.1	81049.5	-1.0384	8.56128e-05	0.00188326	rpl-32	II	9056499	9057111	-	473	protein_coding	Ribosomal Protein, Large subunit [Source:UniProtKB/TrEMBL;Acc:Q22716]	-
WBGene00007425	104.161	202.008	202.192	66.9446	16.852	26.2268	169.454	36.6745	2.20109	8.70913e-05	0.001912	C08B6.4	V	10114629	10117368	+	2257	protein_coding	-	-
WBGene00006470	726.289	806.117	974.79	440.719	229.609	377.439	835.732	349.255	1.25832	8.71482e-05	0.001912	tag-120	V	9706603	9709877	-	2060	protein_coding	-	-
WBGene00001227	4067.03	4148.34	4404.64	6771.63	8479.72	7771.13	4206.67	7674.16	-0.867299	8.7265e-05	0.00191205	eif-3.D	III	8969638	8971578	-	1806	protein_coding	Eukaryotic translation initiation factor 3 subunit D [Source:UniProtKB/Swiss-Prot;Acc:P30642]	-
WBGene00020902	790.68	663.467	671.501	1534.15	2148.63	1126.61	708.549	1603.13	-1.17805	8.73861e-05	0.0019122	jmjc-1	I	3631086	3636485	-	2753	protein_coding	Bifunctional lysine-specific demethylase and histidyl-hydroxylase NO66 [Source:UniProtKB/Swiss-Prot;Acc:O01658]	-
WBGene00012783	2402.34	2373.35	2424.45	1484.87	1036.4	1171.09	2400.05	1230.78	0.963221	8.80933e-05	0.00192515	Y43C5A.3	IV	10274036	10275411	+	720	protein_coding	-	-
WBGene00021465	53.0276	66.0595	63.9967	9.29786	14.7455	11.403	61.0279	11.8155	2.37207	8.92268e-05	0.00194738	ekl-7	I	2316307	2318305	+	1797	protein_coding	-	-
WBGene00016900	189.384	116.801	65.8516	34.4021	29.491	23.9463	124.012	29.2798	2.0795	8.93822e-05	0.00194823	C53C11.2	X	17337279	17338632	+	342	protein_coding	-	-
WBGene00017305	49.2399	85.2072	89.0388	14.8766	15.7988	17.1045	74.4953	15.9266	2.22748	8.95273e-05	0.00194885	nspb-12	III	5568213	5568779	-	392	protein_coding	Nematode Specific Peptide family, group B [Source:UniProtKB/TrEMBL;Acc:Q19279]	-
WBGene00015095	284.077	339.871	684.486	70.6638	126.39	185.869	436.145	127.641	1.77519	8.97329e-05	0.00195079	B0261.7	I	5269545	5270941	-	1165	protein_coding	-	-
WBGene00001706	12.31	22.9772	19.4772	0	0	0	18.2548	0	6.57977	9.01729e-05	0.00195781	grd-17	V	16990810	16991459	+	557	pseudogene	-	-
WBGene00009787	10952.1	9483.84	10949	16579	30158.8	20339.5	10461.6	22359.1	-1.09574	9.07345e-05	0.00196667	F46F2.3	X	15259579	15260290	-	628	protein_coding	-	-
WBGene00000634	41.6646	79.4629	100.169	15.8064	8.42601	15.9642	73.7654	13.3988	2.46026	9.08907e-05	0.00196667	col-58	I	6311229	6312413	+	994	protein_coding	COLlagen [Source:UniProtKB/TrEMBL;Acc:P91274]	-
WBGene00003525	52.0807	109.142	92.7488	13.9468	7.37276	25.0866	84.6571	15.4687	2.45878	9.09342e-05	0.00196667	nas-6	IV	17486871	17490779	-	1432	protein_coding	Zinc metalloproteinase nas-6 [Source:UniProtKB/Swiss-Prot;Acc:Q9U3S9]	-
WBGene00020035	101.321	217.326	278.246	75.3127	15.7988	27.3671	198.964	39.4929	2.32656	9.14275e-05	0.00197479	egg-5	I	4168984	4171589	-	2364	protein_coding	Inactive protein-tyrosine phosphatase egg-5 [Source:UniProtKB/Swiss-Prot;Acc:O61789]	-
WBGene00017907	487.665	455.715	356.155	86.4701	129.55	229.2	433.178	148.407	1.54815	9.26287e-05	0.00199815	F28F9.3	IV	3826872	3835895	+	323	protein_coding	-	-
WBGene00017070	703.563	641.447	790.22	1238.48	1367.12	1534.84	711.743	1380.15	-0.95516	9.38284e-05	0.00202142	praf-3	IV	8379984	8381925	+	782	protein_coding	PRA1 family protein [Source:UniProtKB/TrEMBL;Acc:Q4TTA9]	-
WBGene00007499	420.433	390.613	446.122	155.274	170.627	229.2	419.056	185.034	1.18095	9.40669e-05	0.00202395	C09H10.5	II	11100479	11103779	-	1280	protein_coding	-	-
WBGene00008436	2066.18	2426.97	1781.7	1214.3	928.967	652.25	2091.62	931.84	1.16594	9.52302e-05	0.0020441	DH11.2	II	8012816	8015264	+	1538	protein_coding	-	-
WBGene00010568	45.4522	101.483	121.501	19.5255	7.37276	0	89.4786	8.96609	3.29745	9.52479e-05	0.0020441	K04G2.10	I	8059782	8060558	+	777	protein_coding	-	-
WBGene00015073	117.418	191.477	280.101	52.9978	74.7808	45.6119	196.332	57.7969	1.76396	9.55344e-05	0.00204762	B0238.9	V	5275554	5278101	-	2018	protein_coding	-	-
WBGene00004027	132.569	210.624	297.724	81.8212	64.2483	57.0149	213.639	67.6948	1.65613	9.73728e-05	0.00208435	pie-1	III	12426862	12429195	+	1147	protein_coding	Pharynx and intestine in excess protein 1 [Source:UniProtKB/Swiss-Prot;Acc:Q94131]	-
WBGene00019779	5812.21	4976.48	4827.57	2350.5	2660.51	973.814	5205.42	1994.94	1.38349	9.75371e-05	0.0020852	endu-2	X	8242056	8247869	+	1935	protein_coding	ENDonuclease, poly(U) specific [Source:UniProtKB/TrEMBL;Acc:Q9GYM9]	-
WBGene00004043	151.507	274.769	374.705	85.5404	68.4613	102.627	266.994	85.5428	1.64293	9.84105e-05	0.00210118	plk-2	I	2755540	2758204	-	2177	protein_coding	Serine/threonine-protein kinase plk-2 [Source:UniProtKB/Swiss-Prot;Acc:Q9N2L7]	-
WBGene00013432	23.673	59.3578	74.199	8.36808	4.213	0	52.41	4.19369	3.61182	0.000100797	0.00214873	Y66D12A.6	III	11580694	11581402	-	589	protein_coding	-	-
WBGene00006780	15309.8	11227.2	8768.47	24010.8	25045.3	23505	11768.5	24187	-1.0393	0.000100895	0.00214873	unc-44	IV	5966656	6004857	+	23084	protein_coding	AO49 ankyrin [Source:UniProtKB/TrEMBL;Acc:Q7JP86]	-
WBGene00004420	36637.3	34996.2	33448.9	56183.3	64352.6	65473.6	35027.5	62003.2	-0.823851	0.000102394	0.0021765	rpl-9	III	7572105	7572831	-	626	protein_coding	60S ribosomal protein L9 [Source:UniProtKB/Swiss-Prot;Acc:Q95Y90]	-
WBGene00003890	808.671	546.666	473.946	1446.75	1124.87	1489.23	609.761	1353.62	-1.15054	0.000102509	0.0021765	osm-10	III	7243305	7245743	+	1633	protein_coding	Major sperm protein [Source:UniProtKB/TrEMBL;Acc:Q22622]	-
WBGene00017253	6.62845	19.1477	32.4621	0	0	0	19.4127	0	6.66881	0.000102589	0.0021765	sdz-9	II	2772389	2773634	-	1196	protein_coding	SKN-1 Dependent Zygotic transcript [Source:UniProtKB/TrEMBL;Acc:P91233]	-
WBGene00000675	444.106	315.937	408.095	165.502	174.84	181.307	389.379	173.883	1.16352	0.000104183	0.00220572	col-101	IV	325437	326711	-	1106	protein_coding	COLlagen [Source:UniProtKB/TrEMBL;Acc:O45105]	-
WBGene00015141	879.69	665.382	790.22	1990.67	2417.21	1135.74	778.431	1847.87	-1.24736	0.000104241	0.00220572	ugt-46	X	525929	530289	-	2230	protein_coding	Putative UDP-glucuronosyltransferase ugt-46 [Source:UniProtKB/Swiss-Prot;Acc:Q10941]	-
WBGene00007786	3324.64	3908.04	3795.28	2162.68	1794.74	2035.43	3675.99	1997.62	0.879795	0.000104362	0.00220572	rmd-2	V	9983924	9986277	-	1647	protein_coding	Regulator of Microtubule Dynamics [Source:UniProtKB/TrEMBL;Acc:B2D6P1]	-
WBGene00019298	11327.1	12431.6	11780.9	7016.17	5869.77	3683.16	11846.6	5523.03	1.10084	0.000104842	0.00221307	K02D7.1	IV	292429	298280	-	1182	protein_coding	Purine nucleoside phosphorylase [Source:UniProtKB/TrEMBL;Acc:O61217]	-
WBGene00009957	1158.09	1306.83	1251.18	573.678	714.104	656.812	1238.7	648.198	0.934585	0.000105173	0.00221726	F53B2.8	IV	12526260	12527339	-	814	protein_coding	-	-
WBGene00017834	15310.8	12983.1	11791.2	8344.83	6065.67	5361.68	13361.7	6590.73	1.01952	0.000105961	0.00223105	F26F12.3	V	5838960	5845739	-	3772	protein_coding	-	-
WBGene00000743	1542.54	956.427	1409.78	1780.54	3432.55	7146.25	1302.91	4119.78	-1.66069	0.000106892	0.00224783	col-170	X	6331620	6332686	+	1013	protein_coding	COLlagen [Source:UniProtKB/TrEMBL;Acc:Q86NE3]	-
WBGene00002135	3743.18	3548.06	4121.76	6515.01	6660.76	7157.65	3804.33	6777.81	-0.833146	0.000107559	0.00225873	inx-13	I	3748523	3753958	-	1438	protein_coding	Innexin [Source:UniProtKB/TrEMBL;Acc:O44887]	-
WBGene00014772	1943.08	1661.06	1149.16	2976.25	3122.89	4186.03	1584.43	3428.39	-1.11351	0.000107681	0.00225873	F56D5.4	IV	9402576	9404038	-	1011	pseudogene	-	-
WBGene00007439	114.578	312.107	270.826	66.0148	51.6093	85.5223	232.504	67.7155	1.78085	0.000108619	0.00227555	C08E8.3	V	18350148	18350464	+	257	protein_coding	-	-
WBGene00022738	2432.64	2647.17	2744.44	4329.09	5550.63	4593.12	2608.08	4824.28	-0.887298	0.000108885	0.00227827	fubl-2	III	7085197	7087741	-	1919	protein_coding	FUBp (FUBP) Like [Source:UniProtKB/TrEMBL;Acc:Q23487]	-
WBGene00017841	107.949	233.602	261.552	51.1383	28.4378	77.5402	201.034	52.3721	1.94278	0.00011062	0.00231167	F26G1.5	II	4770534	4771382	-	751	protein_coding	-	-
WBGene00020784	1557.69	1957.85	1814.17	961.399	816.27	1005.74	1776.57	927.804	0.93723	0.000111269	0.00232234	tat-4	II	6234483	6244287	-	4761	protein_coding	Phospholipid-transporting ATPase [Source:UniProtKB/TrEMBL;Acc:Q7JPE4]	-
WBGene00023252	101.321	116.801	82.5464	34.4021	16.852	26.2268	100.223	25.827	1.95234	0.000111583	0.00232599	C39H7.2	IV	5611090	5612090	+	1001	pseudogene	-	-
WBGene00016652	261.35	300.619	500.843	146.906	142.189	108.328	354.271	132.474	1.41821	0.000112048	0.00233277	got-2.1	I	4637432	4640882	-	1373	protein_coding	Aspartate aminotransferase [Source:UniProtKB/TrEMBL;Acc:O01804]	-
WBGene00021576	162.871	351.36	424.789	139.468	50.556	59.2955	313.007	83.1065	1.90974	0.000113092	0.00235157	fbxc-51	II	868814	871699	+	1644	protein_coding	F-box C protein [Source:UniProtKB/TrEMBL;Acc:Q9N4X2]	-
WBGene00007142	3620.08	4147.39	4183.9	6913.89	6742.91	10023.2	3983.79	7893.34	-0.986444	0.000113327	0.00235354	ttr-18	II	11485510	11486774	-	571	protein_coding	TransThyretin-Related family domain [Source:UniProtKB/TrEMBL;Acc:Q17473]	-
WBGene00012104	182.756	272.854	452.614	109.715	112.698	68.4179	302.741	96.9435	1.64146	0.000114164	0.00236798	sygl-1	I	12483809	12486235	+	838	protein_coding	-	-
WBGene00016957	535.011	502.627	374.705	967.908	999.535	895.134	470.781	954.192	-1.01939	0.000115006	0.00238248	atic-1	IV	7882028	7900247	+	2142	protein_coding	5-Aminoimidazole-4-carboxamide ribonucleotide formylTransferase/IMP Cyclohydrolase homolog [Source:UniProtKB/TrEMBL;Acc:Q95QQ4]	-
WBGene00020040	60.603	76.5907	94.6037	12.0872	0	14.8239	77.2658	8.97036	3.10785	0.000116397	0.00240832	R12E2.15	I	4148832	4149429	-	327	protein_coding	-	-
WBGene00009971	378.769	404.973	408.095	204.553	107.432	55.8746	397.279	122.62	1.69239	0.000117094	0.00241976	F53C11.1	V	13775751	13777767	+	1571	protein_coding	-	-
WBGene00284855	12.31	12.446	29.6796	0	0	0	18.1452	0	6.57148	0.000117397	0.00242301	C04C11.25	X	14015362	14015466	-	105	protein_coding	-	-
WBGene00020700	531.223	433.695	499.916	224.079	225.396	255.427	488.278	234.967	1.05576	0.000118679	0.00244646	T22F3.11	V	3612173	3614551	-	1683	protein_coding	-	-
WBGene00001209	5471.31	5919.5	5398.91	10503.8	12296.7	8701.61	5596.57	10500.7	-0.90789	0.000119083	0.00245177	egl-45	III	7824377	7828626	-	3588	protein_coding	Eukaryotic translation initiation factor 3 subunit A [Source:UniProtKB/Swiss-Prot;Acc:P34339]	-
WBGene00014252	3626.71	3239.79	3184.99	1442.1	1930.61	784.525	3350.5	1385.74	1.27352	0.000119529	0.00245792	ZK1320.2	II	9657876	9659002	-	704	protein_coding	-	-
WBGene00021830	888.213	775.481	915.43	1391.89	1770.51	1808.51	859.708	1656.97	-0.946417	0.000119919	0.00246076	Y54E10A.10	I	3173243	3176319	-	1019	protein_coding	Ribosome production factor 2 homolog [Source:UniProtKB/Swiss-Prot;Acc:Q9N3F0]	-
WBGene00013119	606.977	615.598	637.184	322.636	281.218	149.379	619.92	251.078	1.30235	0.000119962	0.00246076	Y51H4A.25	IV	16736329	16743178	+	2612	protein_coding	-	-
WBGene00015152	106.055	70.8464	77.909	173.87	227.502	315.862	84.9369	239.078	-1.49183	0.000120404	0.00246681	B0348.2	V	45310	46916	+	553	protein_coding	-	zf-LITAF-like
WBGene00021978	121.206	283.386	230.944	76.2425	33.704	69.5582	211.845	59.8349	1.82296	0.000121473	0.00248567	Y58A7A.4	V	5082002	5085007	-	2757	protein_coding	-	-
WBGene00021773	6.62845	36.3806	14.8398	0	0	0	19.2829	0	6.65856	0.000122652	0.00250672	fbxb-42	II	1537621	1538666	+	999	protein_coding	F-box B protein [Source:UniProtKB/TrEMBL;Acc:Q9N3J6]	-
WBGene00008080	54.9215	124.46	193.845	13.9468	22.1183	38.7701	124.409	24.9451	2.32551	0.000123029	0.00251136	C44B9.3	III	10878191	10880183	-	1143	protein_coding	-	-
WBGene00020791	15.1507	28.7215	10.2024	0	0	0	18.0249	0	6.56117	0.000123661	0.00252117	T25B6.5	X	9020588	9021755	-	396	protein_coding	-	-
WBGene00007225	404.336	927.705	1413.49	286.374	67.4081	312.442	915.177	222.075	2.04303	0.000124264	0.00252829	C01G6.3	II	9269888	9271267	+	1285	protein_coding	-	-
WBGene00002783	3952.45	2549.51	1903.2	9811.11	8599.79	4168.93	2801.72	7526.61	-1.42574	0.000124312	0.00252829	let-607	I	6574004	6585510	+	3414	protein_coding	-	TF_bZIP
WBGene00007925	422.327	455.715	482.294	838.667	802.577	1258.89	453.445	966.711	-1.09177	0.000127374	0.00258741	C34C12.6	III	3482591	3484843	+	1303	protein_coding	CRAL-TRIO domain-containing protein C34C12.6 [Source:UniProtKB/Swiss-Prot;Acc:Q09270]	-
WBGene00010560	3070.87	3109.58	3580.1	5288.63	5979.31	6488.29	3253.52	5918.74	-0.863233	0.000127747	0.00259184	eif-2beta	I	8026606	8028752	-	1097	protein_coding	Eukaryotic translation initiation factor 2 subunit 2 [Source:UniProtKB/Swiss-Prot;Acc:Q21230]	-
WBGene00002891	2711.98	3070.33	2948.48	4887.89	5961.4	4987.66	2910.27	5278.98	-0.8591	0.000128073	0.0025953	let-767	III	6338508	6340228	-	1454	protein_coding	Very-long-chain 3-oxooacyl-coA reductase let-767 [Source:UniProtKB/Swiss-Prot;Acc:Q09517]	-
WBGene00006686	397.707	516.987	446.122	220.359	219.076	129.994	453.605	189.81	1.25535	0.000129855	0.00262823	twk-34	V	15704960	15709528	+	2131	protein_coding	TWiK family of potassium channels [Source:UniProtKB/TrEMBL;Acc:G5EGD4]	-
WBGene00021035	390.132	846.327	1501.6	182.238	126.39	409.367	912.687	239.332	1.93213	0.000130742	0.0026376	W05F2.3	I	3367640	3368550	-	797	protein_coding	-	-
WBGene00012850	4318.91	4149.3	3864.84	2198.02	2166.54	2520.06	4111.02	2294.87	0.841161	0.000130782	0.0026376	Y44A6C.1	V	20713920	20716872	+	1272	protein_coding	-	-
WBGene00008934	484.824	598.365	475.801	862.842	1062.73	1466.42	519.663	1130.67	-1.12119	0.000130791	0.0026376	F18C12.3	I	8095740	8098444	+	1716	protein_coding	-	-
WBGene00013127	246.2	352.317	525.886	131.1	144.295	152.8	374.801	142.732	1.39349	0.000131063	0.00263805	Y52B11A.8	I	11032339	11034055	+	629	protein_coding	Phospholipase A2-like protein Y52B11A.8 [Source:UniProtKB/Swiss-Prot;Acc:Q9U256]	-
WBGene00206512	35.983	44.0397	25.9697	4.64893	0	0	35.3308	1.54964	4.43404	0.00013113	0.00263805	Y39A3B.7	III	1983749	1984960	-	409	protein_coding	-	-
WBGene00001858	911.886	1000.47	1177.91	397.949	357.052	624.883	1030.09	459.961	1.16394	0.000131963	0.00265164	hil-7	IV	6646034	6646936	+	903	protein_coding	HIstone H1 Like; Histone H1.Q [Source:UniProtKB/TrEMBL;Acc:Q9U3W3]	-
WBGene00021828	399.601	352.317	315.346	878.648	871.039	569.009	355.755	772.898	-1.11985	0.000133675	0.00268281	Y54E10A.6	I	3163688	3167925	+	2020	protein_coding	-	-
WBGene00017092	102.268	70.8464	63.9967	20.4553	18.9585	18.2448	79.0369	19.2195	2.0385	0.000135417	0.00271451	E02C12.6	V	9369549	9371086	-	1260	protein_coding	-	-
WBGene00016728	579.516	704.635	526.813	282.655	314.922	285.074	603.655	294.217	1.03684	0.00013694	0.00274176	C46H11.2	I	5050040	5052523	+	1367	protein_coding	Flavin-containing monooxygenase [Source:UniProtKB/TrEMBL;Acc:Q9GYJ1]	-
WBGene00194892	79.5414	144.565	191.062	46.4893	37.917	28.5074	138.39	37.6379	1.87516	0.000138467	0.00276901	dsb-2	II	14411095	14412218	+	937	protein_coding	Double-Strand Break factor [Source:UniProtKB/TrEMBL;Acc:D2Y8W2]	-
WBGene00022148	1934.56	1920.51	2148.06	3147.33	3850.69	4082.27	2001.04	3693.43	-0.884103	0.000139125	0.00277884	ddx-27	I	1767887	1790157	+	2427	protein_coding	DEAD boX helicase homolog [Source:UniProtKB/TrEMBL;Acc:Q95XM9]	-
WBGene00022910	925.142	881.751	669.646	419.334	430.78	372.877	825.513	407.664	1.01761	0.000140671	0.00280637	C05D2.11	III	5626944	5628206	+	1263	ncRNA	-	-
WBGene00007476	763.219	695.061	717.875	218.5	361.265	391.122	725.385	323.629	1.16567	0.000141185	0.00281326	C09E9.1	IV	1275865	1277091	+	927	protein_coding	-	-
WBGene00008218	1982.85	3408.29	5801.44	1458.83	1178.59	1606.68	3730.86	1414.7	1.39905	0.000141405	0.00281429	nasp-2	V	13310186	13312260	-	1925	protein_coding	NASP (Human Nuclear Autoantigenic Sperm Protein) homolog [Source:UniProtKB/TrEMBL;Acc:O17687]	-
WBGene00008561	78.5945	134.034	191.062	50.2085	23.1715	14.8239	134.564	29.4013	2.18604	0.000142182	0.00282639	F07H5.10	II	8807133	8808582	-	1198	protein_coding	-	-
WBGene00016999	31.2484	64.1447	102.024	13.017	1.05325	0	65.8056	4.69009	3.77306	0.000144777	0.00287457	D1005.5	X	1470998	1472919	-	820	protein_coding	-	-
WBGene00016522	168.552	169.457	127.066	66.9446	33.704	47.8925	155.025	49.5137	1.6433	0.000144984	0.00287525	fbxa-38	III	2224672	2227198	+	1116	protein_coding	F-box A protein [Source:UniProtKB/TrEMBL;Acc:Q9N5X0]	-
WBGene00019280	730.077	760.163	616.779	375.634	325.455	363.755	702.34	354.948	0.984375	0.000145205	0.00287623	K01A2.5	II	302405	303659	+	865	protein_coding	-	-
WBGene00015312	124.047	213.497	308.853	49.2787	11.5858	75.2597	215.466	45.3747	2.24944	0.000147052	0.00290938	C01G8.1	I	5272846	5274339	-	1245	protein_coding	-	-
WBGene00014199	114.578	213.497	309.781	74.3829	16.852	54.7343	212.618	48.6564	2.12534	0.000147456	0.00291392	ZK1053.4	I	13241645	13244797	+	2258	protein_coding	-	-
WBGene00019187	197.907	300.619	234.654	117.153	85.3133	63.8567	244.393	88.7744	1.45779	0.000148041	0.00291945	H11E01.2	X	1621481	1625247	+	1414	protein_coding	-	-
WBGene00010744	590.879	398.272	394.182	963.259	851.027	1142.58	461.111	985.621	-1.09581	0.000148085	0.00291945	K10D6.4	V	11201905	11216774	+	1885	protein_coding	-	-
WBGene00013080	3011.21	2517.92	2693.42	1425.36	1502.99	770.841	2740.85	1233.06	1.15207	0.000148751	0.00292911	Y51A2D.13	V	18573056	18579784	-	1923	protein_coding	-	-
WBGene00008449	276.501	357.104	351.518	85.5404	31.5975	153.94	328.374	90.3594	1.86361	0.000150185	0.00295387	E01G6.1	X	12260881	12266537	+	4627	protein_coding	-	-
WBGene00000602	17.0446	35.4232	59.3592	111.574	125.337	228.06	37.2757	154.99	-2.05401	0.000151929	0.00297626	col-13	V	10420890	10421892	-	951	protein_coding	Cuticle collagen 13 [Source:UniProtKB/Swiss-Prot;Acc:P20631]	-
WBGene00021715	415.699	359.019	378.415	595.993	910.009	973.814	384.378	826.605	-1.10419	0.000152037	0.00297626	Y49F6B.2	II	3502968	3504910	+	849	protein_coding	-	-
WBGene00013958	590.879	584.962	723.44	1040.43	1382.92	1315.9	633.094	1246.42	-0.977036	0.000152048	0.00297626	nol-16	I	8255348	8256312	+	681	protein_coding	Nucleolar protein 16 [Source:UniProtKB/Swiss-Prot;Acc:Q94402]	-
WBGene00018961	338.998	340.829	383.98	615.519	694.092	836.979	354.602	715.53	-1.01234	0.000152141	0.00297626	mrps-16	II	5474373	5475475	+	664	protein_coding	Probable 28S ribosomal protein S16, mitochondrial [Source:UniProtKB/Swiss-Prot;Acc:Q10129]	-
WBGene00015776	3940.14	3813.26	3811.97	2502.06	1750.5	1774.3	3855.13	2008.95	0.940115	0.000152213	0.00297626	dct-1	X	7954355	7956211	+	1194	protein_coding	NIP3 homolog [Source:UniProtKB/Swiss-Prot;Acc:Q09969]	-
WBGene00004131	8407.72	5315.4	4771.92	12119.8	13720.7	12617.4	6165.01	12819.3	-1.05614	0.000152734	0.00298296	pqn-44	I	5372854	5384508	-	2308	protein_coding	Prion-like-(Q/N-rich)-domain-bearing protein [Source:UniProtKB/TrEMBL;Acc:Q86NJ5]	-
WBGene00012840	287.864	325.511	191.062	43.7	58.9821	133.415	268.146	78.699	1.77284	0.000156222	0.00304752	grsp-1	V	19609494	19612099	+	1286	protein_coding	Glycine Rich Secreted Protein [Source:UniProtKB/TrEMBL;Acc:Q7YWQ8]	-
WBGene00000928	276.501	598.365	781.872	264.989	68.4613	87.8029	552.246	140.418	1.97318	0.000157532	0.00306948	dao-2	II	4562853	4563546	+	605	protein_coding	Dauer or Aging adult Overexpression [Source:UniProtKB/TrEMBL;Acc:Q86LS4]	-
WBGene00003548	173.287	367.635	370.068	132.959	97.9523	80.9611	303.663	103.958	1.5445	0.000160474	0.00312317	nas-30	I	943664	947710	+	2055	protein_coding	Zinc metalloproteinase nas-30 [Source:UniProtKB/Swiss-Prot;Acc:Q9N2V2]	-
WBGene00013093	1491.4	1995.19	1968.13	989.293	925.808	539.361	1818.24	818.154	1.15162	0.000160664	0.00312324	cup-14	II	13855788	13872315	-	3715	protein_coding	-	-
WBGene00044760	6.62845	20.1051	26.8971	0	0	0	17.8769	0	6.54981	0.000160896	0.00312412	Y71H2AM.25	III	2802450	2803681	+	915	protein_coding	-	-
WBGene00004125	448.841	377.209	378.415	636.904	894.21	1025.13	401.488	852.081	-1.08517	0.000162437	0.00315037	mdt-30	III	8025210	8028042	-	1459	protein_coding	Glutamine/asparagine-rich protein mdt-30 [Source:UniProtKB/Swiss-Prot;Acc:P34428]	-
WBGene00000772	219.686	232.644	538.87	149.696	64.2483	61.5761	330.4	91.84	1.844	0.000165623	0.00320845	cpb-3	I	5788634	5791752	-	2803	protein_coding	Cytoplasmic polyadenylation element-binding protein 3 [Source:UniProtKB/Swiss-Prot;Acc:O01835]	-
WBGene00003230	611.711	934.407	1391.23	286.374	184.319	513.134	979.117	327.942	1.57881	0.000166398	0.00321973	mex-5	IV	13353723	13356104	+	1975	protein_coding	Zinc finger protein mex-5 [Source:UniProtKB/Swiss-Prot;Acc:Q9XUB2]	-
WBGene00008607	2695.89	2619.4	2499.58	8242.56	9131.69	3059.42	2604.96	6811.22	-1.38671	0.000167187	0.00322765	F09B12.3	X	15095343	15097954	-	1839	protein_coding	Putative phospholipase B-like 2 [Source:UniProtKB/Swiss-Prot;Acc:O62146]	-
WBGene00019129	124.994	130.204	133.558	40.9106	52.6626	22.806	129.585	38.793	1.73686	0.000167194	0.00322765	F59G1.8	II	5906545	5907613	+	844	protein_coding	-	-
WBGene00019608	330.476	285.3	542.58	182.238	142.189	122.012	386.119	148.813	1.37426	0.000170593	0.00328947	ani-2	II	6361159	6365367	-	3555	protein_coding	Anillin-like protein 2 [Source:UniProtKB/Swiss-Prot;Acc:Q09994]	-
WBGene00018257	638.225	472.948	450.759	848.895	1199.65	1268.01	520.644	1105.52	-1.08608	0.000173193	0.0033335	F41B4.1	X	6823890	6825862	-	1334	protein_coding	-	-
WBGene00019979	321.006	262.323	225.38	95.768	82.1536	137.976	269.57	105.299	1.35789	0.000173275	0.0033335	R09B5.11	V	1439179	1441871	+	1695	protein_coding	Facilitated glucose transporter homolog [Source:UniProtKB/Swiss-Prot;Acc:O44616]	-
WBGene00013859	1556.74	999.509	801.349	1860.5	2713.17	3579.39	1119.2	2717.69	-1.2798	0.000173535	0.00333467	ZC247.1	I	10264314	10279234	-	13321	protein_coding	-	HTH
WBGene00077526	1517.92	1224.49	1304.98	2065.99	2785.85	3143.8	1349.13	2665.21	-0.982061	0.000174658	0.00335239	C25A1.16	I	10179004	10179744	+	646	protein_coding	-	-
WBGene00021583	1378.72	952.597	812.479	558.802	428.673	246.304	1047.93	411.26	1.34842	0.000175601	0.00336663	clec-72	IV	3944816	3947364	+	1484	protein_coding	C-type LECtin [Source:UniProtKB/TrEMBL;Acc:Q9N3W5]	-
WBGene00006897	21.7792	22.9772	23.1872	131.1	92.6861	53.594	22.6479	92.46	-2.03176	0.000175831	0.00336717	ver-4	X	10982351	10987928	+	3744	protein_coding	Tyrosine-protein kinase receptor ver-4 [Source:UniProtKB/Swiss-Prot;Acc:Q21041]	-
WBGene00015169	157.189	336.999	346.88	112.504	57.9288	101.487	280.356	90.6398	1.62833	0.000179294	0.00342814	B0403.5	X	7057731	7061190	+	1441	protein_coding	-	-
WBGene00015133	837.079	774.524	810.624	1208.72	1719.96	1957.89	807.409	1628.86	-1.0122	0.000179425	0.00342814	mrpl-11	III	8717644	8718567	+	688	protein_coding	Probable 39S ribosomal protein L11, mitochondrial [Source:UniProtKB/Swiss-Prot;Acc:P34264]	-
WBGene00019268	300.174	359.019	376.56	158.064	103.219	173.325	345.251	144.869	1.25314	0.000179694	0.00342937	H41C03.1	II	5854422	5857172	+	1425	protein_coding	-	-
WBGene00019607	606.03	550.496	644.604	1149.22	983.736	1895.17	600.377	1342.71	-1.1609	0.000182547	0.00347985	K10B2.4	II	6360331	6360959	-	464	protein_coding	-	-
WBGene00008062	73.8599	116.801	138.196	22.3149	16.852	42.191	109.619	27.1193	2.02072	0.000182947	0.00348152	set-32	I	9519244	9521275	+	1653	protein_coding	SET (Trithorax/polycomb) domain containing [Source:UniProtKB/TrEMBL;Acc:Q93368]	-
WBGene00195017	17.9915	74.6759	1.85498	0	1.05325	0	31.5075	0.351084	6.40498	0.000183052	0.00348152	srpr-2.2	III	5031410	5031708	-	299	ncRNA	-	-
WBGene00022036	89.0106	129.247	181.788	39.9808	18.9585	46.7522	133.348	35.2305	1.92121	0.000183299	0.00348227	Y65B4BL.4	I	502932	506250	-	1143	protein_coding	-	-
WBGene00009404	149.614	165.627	289.376	52.9978	40.0235	90.0835	201.539	61.035	1.72636	0.000184225	0.00349589	F35C11.5	II	8253740	8255319	+	1266	protein_coding	-	-
WBGene00015903	35.983	73.7186	166.948	11.1574	0	17.1045	92.2165	9.42063	3.29521	0.000184773	0.00350092	C17E7.9	V	3889287	3890861	-	954	protein_coding	-	-
WBGene00007600	46.3992	78.5055	88.1113	175.73	211.703	202.973	71.0053	196.802	-1.47017	0.000184909	0.00350092	C15C6.1	I	12202232	12203717	+	834	protein_coding	-	-
WBGene00001571	122.153	228.815	219.815	83.6808	52.6626	38.7701	190.261	58.3712	1.70029	0.000185659	0.00351113	gei-14	II	8273543	8276231	-	2344	protein_coding	GEX Interacting protein [Source:UniProtKB/TrEMBL;Acc:Q21088]	-
WBGene00006760	2893.79	1685	1393.09	5934.83	6255.26	3061.7	1990.62	5083.93	-1.35279	0.000186023	0.00351405	unc-23	V	8936359	8939676	+	2223	protein_coding	-	-
WBGene00002248	320.06	484.436	569.477	217.57	74.7808	167.624	457.991	153.325	1.57771	0.000188633	0.00355932	lam-3	I	10608466	10621433	+	9456	protein_coding	LAMinin related. See also lmb; Laminin alpha chain [Source:UniProtKB/TrEMBL;Acc:G5ECE3]	-
WBGene00000386	500.922	815.691	1048.99	370.055	342.307	191.57	788.534	301.311	1.38701	0.000190208	0.003585	cdc-25.1	I	6469386	6471995	-	2334	protein_coding	M-phase inducer phosphatase cdc-25.1 [Source:UniProtKB/Swiss-Prot;Acc:O44552]	-
WBGene00020110	1473.41	1475.33	1627.74	2565.28	3108.14	2583.91	1525.49	2752.45	-0.851411	0.000192631	0.00362659	hsp-75	III	7223233	7226924	-	2153	protein_coding	Heat Shock Protein [Source:UniProtKB/TrEMBL;Acc:H2L001]	-
WBGene00020566	378.769	408.803	550.928	235.236	143.242	192.71	446.166	190.396	1.22776	0.00019318	0.00363282	ttr-7	III	606004	606994	+	565	protein_coding	TransThyretin-Related family domain [Source:UniProtKB/TrEMBL;Acc:Q7YZH4]	-
WBGene00003764	279.342	139.778	182.715	33.4723	51.6093	90.0835	200.612	58.3884	1.78548	0.000194048	0.00364505	nlp-26	V	19613461	19614533	+	389	protein_coding	Neuropeptide-Like Protein [Source:UniProtKB/TrEMBL;Acc:Q9XWN4]	-
WBGene00015865	514.178	526.561	520.321	940.944	965.831	941.886	520.353	949.554	-0.867755	0.000195985	0.0036773	C16E9.1	X	6940253	6943713	+	1962	protein_coding	-	-
WBGene00007680	282.183	387.74	366.358	100.417	192.745	93.5044	345.427	128.889	1.42238	0.000197631	0.00370403	maa-1	III	11819745	11822526	-	919	protein_coding	Membrane Associated Acyl-CoA binding protein [Source:UniProtKB/TrEMBL;Acc:Q9XTZ5]	-
WBGene00010015	668.527	766.865	762.395	1817.73	1985.38	1027.41	732.595	1610.17	-1.13634	0.000198718	0.00372023	atad-3	II	10248991	10251165	+	2082	protein_coding	ATPase family AAA domain-containing protein 3 [Source:UniProtKB/Swiss-Prot;Acc:Q20748]	-
WBGene00009660	1029.3	900.898	811.552	376.564	425.513	548.483	913.918	450.187	1.02228	0.000199166	0.00372445	F43G6.8	II	11812294	11814113	-	957	protein_coding	-	-
WBGene00018532	2800.05	2523.66	2109.11	4269.58	4357.3	5017.31	2477.61	4548.06	-0.876277	0.000200627	0.00374757	F47B7.1	X	3788026	3788532	+	428	protein_coding	UPF0057 membrane protein F47B7.1 [Source:UniProtKB/Swiss-Prot;Acc:Q20516]	-
WBGene00015899	95.6391	156.054	326.476	24.1744	26.3313	76.4	192.723	42.3019	2.19327	0.00020264	0.00378095	C17E7.4	V	3892856	3894573	+	1177	protein_coding	-	-
WBGene00016139	523.648	481.564	565.767	1189.2	998.482	866.626	523.66	1018.1	-0.959468	0.000204813	0.00381495	ntl-9	III	4944513	4947317	+	1676	protein_coding	NOT-Like (Yeast CCR4/NOT complex component) [Source:UniProtKB/TrEMBL;Acc:Q18224]	-
WBGene00004354	43.5584	82.335	120.573	13.017	9.47926	25.0866	82.1556	15.8609	2.37988	0.000204918	0.00381495	rgs-11	X	14964553	14965976	+	1103	protein_coding	Regulator of G-protein signaling rgs-11 [Source:UniProtKB/Swiss-Prot;Acc:O45524]	-
WBGene00021149	267.032	327.425	383.052	543.925	700.412	987.498	325.837	743.945	-1.19044	0.000206197	0.00383112	dnc-3	II	3553724	3554618	+	699	protein_coding	DyNactin Complex component [Source:UniProtKB/TrEMBL;Acc:Q965K5]	-
WBGene00017177	109.843	232.644	363.575	53.9276	26.3313	92.3641	235.354	57.541	2.03452	0.00020627	0.00383112	F02E8.4	X	4454120	4457304	+	2489	protein_coding	-	-
WBGene00019344	482.93	496.882	573.187	281.725	208.544	112.889	517.667	201.053	1.36235	0.000206475	0.00383112	dhhc-10	X	4707188	4709812	+	1203	protein_coding	Palmitoyltransferase [Source:UniProtKB/TrEMBL;Acc:Q21161]	-
WBGene00000301	1292.55	2733.33	3564.34	1156.65	782.566	1025.13	2530.07	988.116	1.35635	0.000207212	0.00383977	cav-1	IV	9772510	9773470	+	836	protein_coding	Caveolin-1 [Source:UniProtKB/Swiss-Prot;Acc:Q94051]	-
WBGene00077531	21.7792	44.0397	67.7066	7.43829	3.15975	0	44.5085	3.53268	3.61944	0.0002074	0.00383977	F40G9.15	III	181561	182981	+	765	protein_coding	-	-
WBGene00012907	14011.6	14056.3	14774	9158.4	5952.97	3970.52	14280.6	6360.63	1.16672	0.000209681	0.0038777	cpt-1	II	12788252	12796452	-	2796	protein_coding	Carnitine Palmitoyl Transferase [Source:UniProtKB/TrEMBL;Acc:Q9U2F2]	-
WBGene00017269	170.446	271.897	382.125	83.6808	109.538	104.907	274.823	99.3754	1.46868	0.000209973	0.00387881	F08F8.4	III	7357663	7359183	-	1233	protein_coding	-	-
WBGene00007806	18.9384	39.2527	21.3322	1.85957	0	0	26.5078	0.619858	5.31165	0.000210723	0.00388838	clec-230	V	15347847	15349144	-	619	protein_coding	C-type LECtin [Source:UniProtKB/TrEMBL;Acc:O45272]	-
WBGene00001620	2612.56	1467.67	1448.74	3443	3882.28	4920.38	1842.99	4081.89	-1.14714	0.000211904	0.00390502	glt-1	X	3496026	3499165	+	1854	protein_coding	Excitatory amino acid transporter [Source:UniProtKB/Swiss-Prot;Acc:Q10901]	-
WBGene00021087	11.3631	29.6789	25.0422	0.929786	0	0	22.028	0.309929	5.88905	0.000212092	0.00390502	W08E12.6	IV	3298629	3299687	+	648	protein_coding	-	-
WBGene00011850	2278.29	3182.34	3137.69	1785.19	1181.75	935.044	2866.11	1300.66	1.13947	0.000212711	0.0039121	T20B3.1	V	16815567	16820712	+	1977	protein_coding	-	-
WBGene00008061	97.5329	186.69	232.799	37.1915	8.42601	60.4358	172.341	35.3511	2.28809	0.0002138	0.00392781	C41G7.3	I	9517026	9518736	-	1437	protein_coding	-	-
WBGene00003528	954.497	726.654	639.039	375.634	253.833	415.068	773.397	348.179	1.15149	0.000214741	0.00394076	nas-9	V	4836027	4840010	-	1800	protein_coding	Zinc metalloproteinase nas-9 [Source:UniProtKB/Swiss-Prot;Acc:P91137]	-
WBGene00044488	1630.6	1980.83	2046.04	786.599	1179.64	573.57	1885.82	846.603	1.15528	0.000216168	0.00396261	Y54G2A.45	IV	2805839	2809504	+	1108	protein_coding	-	-
WBGene00017347	1743.28	1547.13	1739.04	2565.28	3174.5	4366.2	1676.48	3368.66	-1.00658	0.000217018	0.00397383	F10E7.5	II	7111978	7112982	+	814	protein_coding	Ribosome assembly factor mrt4 [Source:UniProtKB/TrEMBL;Acc:Q19302]	-
WBGene00014052	48.293	31.5937	53.7943	99.4871	132.71	217.797	44.5603	149.998	-1.74897	0.000217585	0.00397681	ZK669.2	II	7936592	7938583	-	919	protein_coding	-	-
WBGene00021133	905.257	760.163	755.902	1279.39	1558.81	1986.4	807.107	1608.2	-0.994357	0.000217657	0.00397681	tomm-22	II	468374	470475	-	473	protein_coding	Mitochondrial import receptor subunit TOM22 homolog [Source:UniProtKB/Swiss-Prot;Acc:O17287]	-
WBGene00007133	90.9045	107.227	136.341	37.1915	29.491	7.98208	111.491	24.8882	2.15469	0.000220492	0.00402421	B0284.3	III	4379368	4381041	-	612	protein_coding	-	-
WBGene00015455	47.3461	63.1873	42.6644	2.78936	11.5858	0	51.066	4.79171	3.40928	0.000222245	0.00405179	C04G6.5	II	5085785	5086121	+	278	protein_coding	UPF0057 membrane protein C04G6.5 [Source:UniProtKB/Swiss-Prot;Acc:Q17638]	-
WBGene00010957	48.293	50.7413	39.882	120.872	183.266	111.749	46.3054	138.629	-1.58228	0.000224243	0.00408377	nduo-6	MtDNA	113	549	+	437	protein_coding	NADH-ubiquinone oxidoreductase chain 6 [Source:UniProtKB/Swiss-Prot;Acc:P24885]	-
WBGene00013435	777.423	881.751	1151.94	1656.88	2111.77	1767.46	937.038	1845.37	-0.977634	0.000226422	0.00411895	Y66D12A.9	III	11568137	11573343	+	920	protein_coding	-	-
WBGene00021293	12.31	53.6135	63.9967	6.50851	1.05325	0	43.3067	2.52059	4.05397	0.000227645	0.0041367	Y25C1A.6	II	3061082	3062112	+	734	protein_coding	-	-
WBGene00013151	200.747	241.261	228.162	354.249	543.478	608.919	223.39	502.215	-1.16802	0.000228308	0.00414425	nsun-5	II	14969617	14977005	+	1458	protein_coding	Nop2 (NOP2)/SUN domain family member [Source:UniProtKB/TrEMBL;Acc:Q9NAA8]	-
WBGene00001234	1780.21	1757.76	2123.02	2819.11	3900.19	4190.59	1887	3636.63	-0.94638	0.000229516	0.00416166	eif-6	I	12968921	12970238	+	996	protein_coding	Eukaryotic translation initiation factor 6 [Source:UniProtKB/Swiss-Prot;Acc:O62106]	-
WBGene00017667	291.652	422.206	317.201	161.783	144.295	67.2776	343.686	124.452	1.46291	0.000231585	0.00419462	ttr-37	X	1335363	1336915	-	561	protein_coding	TransThyretin-Related family domain [Source:UniProtKB/TrEMBL;Acc:O16586]	-
WBGene00022244	93.7452	185.732	361.72	33.4723	34.7573	84.382	213.733	50.8705	2.07503	0.000235396	0.00425904	Y73B6BL.23	IV	6417696	6419078	-	1101	protein_coding	-	-
WBGene00006546	32.1953	77.5481	154.89	11.1574	16.852	0	88.2113	9.33648	3.23095	0.000237935	0.00430031	tbx-9	III	10339984	10341858	-	967	protein_coding	T-box transcription factor tbx-9 [Source:UniProtKB/Swiss-Prot;Acc:Q22289]	T-box
WBGene00004702	1035.93	1213.01	1542.41	2034.37	2475.14	4191.73	1263.78	2900.42	-1.19832	0.000238316	0.00430256	rsp-5	II	6490158	6491340	+	1027	protein_coding	Probable splicing factor, arginine/serine-rich 5 [Source:UniProtKB/Swiss-Prot;Acc:Q10021]	-
WBGene00023401	26.5138	40.2101	55.6493	7.43829	1.05325	0	40.7911	2.83051	3.79907	0.000240742	0.00434167	ZK380.t2	X	1643850	1643922	+	73	pseudogene	-	-
WBGene00013968	84.276	34.4658	43.5919	9.29786	7.37276	0	54.1113	5.55687	3.26158	0.000242515	0.00436888	ZK287.9	V	9679357	9680215	+	490	protein_coding	-	-
WBGene00000558	749.962	1268.53	1756.66	519.751	364.425	626.023	1258.39	503.4	1.322	0.000242774	0.00436888	cnc-4	V	1447195	1447707	+	435	protein_coding	CaeNaCin (Caenorhabditis bacteriocin) [Source:UniProtKB/TrEMBL;Acc:O44613]	-
WBGene00044802	0.946922	2.87215	0	0.929786	82.1536	45.6119	1.27302	42.8984	-5.08031	0.000244183	0.00438952	ZC262.10	III	8345699	8346826	-	528	protein_coding	-	-
WBGene00021927	256.616	287.215	326.476	140.398	124.284	131.134	290.102	131.939	1.13632	0.000244604	0.00439236	abhd-14	IV	1027787	1030024	-	910	protein_coding	ABHydrolase Domain containing homolog [Source:UniProtKB/TrEMBL;Acc:Q9N366]	-
WBGene00012362	3354	3129.69	3060.71	1851.2	1500.88	754.877	3181.46	1368.99	1.21622	0.000247023	0.00443104	W09D10.4	III	10711724	10716191	-	1766	protein_coding	-	-
WBGene00022722	1105.06	1304.91	1383.81	2371.89	2604.69	2033.15	1264.59	2336.58	-0.885772	0.000247823	0.00444063	tomm-70	III	8752091	8754750	-	1879	protein_coding	Mitochondrial import receptor subunit tomm-70 [Source:UniProtKB/Swiss-Prot;Acc:Q02335]	-
WBGene00011746	316.272	436.567	539.798	219.43	181.159	122.012	430.879	174.2	1.30488	0.000248357	0.00444544	T13F2.6	IV	9778288	9781203	+	2489	protein_coding	-	-
WBGene00006977	137.304	219.241	386.762	109.715	53.7158	45.6119	247.769	69.6808	1.82653	0.000249779	0.0044661	zif-1	III	9002779	9004839	+	1784	protein_coding	Zinc finger-interacting factor 1 [Source:UniProtKB/Swiss-Prot;Acc:P34482]	-
WBGene00020895	403.389	511.243	430.354	206.413	190.638	66.1373	448.329	154.396	1.5357	0.000250262	0.00446684	plpp-1.2	II	6485677	6488861	+	2082	protein_coding	Phospholipid phosphatase homolog 1.2 homolog [Source:UniProtKB/Swiss-Prot;Acc:Q10022]	-
WBGene00001487	65.3376	59.3578	68.6341	20.4553	11.5858	9.12238	64.4432	13.7211	2.22108	0.000250354	0.00446684	frk-1	IV	10043183	10045739	+	1722	protein_coding	Fer-related kinase 1 [Source:UniProtKB/Swiss-Prot;Acc:Q22146]	-
WBGene00001730	251.881	582.089	644.604	243.604	82.1536	53.594	492.858	126.451	1.95964	0.000251104	0.00447286	grl-21	IV	10737474	10738189	+	673	protein_coding	GRound-Like (Grd related) [Source:UniProtKB/TrEMBL;Acc:Q23248]	-
WBGene00001613	103.214	87.1219	79.7639	185.027	201.171	309.021	90.0334	231.74	-1.36291	0.000251227	0.00447286	glr-2	III	7138683	7144832	-	2934	protein_coding	Glutamate receptor 2 [Source:UniProtKB/Swiss-Prot;Acc:Q10914]	-
WBGene00014194	41.6646	96.6958	87.1838	18.5957	3.15975	0	75.1814	7.25183	3.3467	0.000253278	0.00450457	ZK1037.6	V	15325822	15327795	-	1579	protein_coding	-	-
WBGene00012961	417.592	965.043	724.368	283.585	150.615	330.686	702.334	254.962	1.46205	0.000254929	0.00452912	Y47H10A.5	I	12095777	12097987	-	1071	protein_coding	-	-
WBGene00003074	465.885	418.377	421.079	720.584	825.749	974.955	435.114	840.429	-0.949364	0.000257377	0.00456776	lars-2	I	7457153	7460756	-	2733	protein_coding	Leucyl Amino-acyl tRNA Synthetase [Source:UniProtKB/TrEMBL;Acc:Q23511]	-
WBGene00008823	30.3015	100.525	108.516	13.9468	12.639	0	79.781	8.86194	3.15614	0.000258628	0.00458508	F14H3.4	V	16053900	16055072	-	957	protein_coding	-	-
WBGene00020757	239.571	299.661	455.396	81.8212	88.4731	174.466	331.543	114.92	1.53127	0.000260521	0.00460836	ucr-2.3	III	879860	881506	+	1399	protein_coding	Ubiquinol-Cytochrome c oxidoReductase complex [Source:UniProtKB/TrEMBL;Acc:Q9TZ33]	-
WBGene00000883	18209.3	18354	17560.1	26967.5	32894.1	48778.5	18041.1	36213.4	-1.00522	0.000260648	0.00460836	cyn-7	V	15186582	15187787	-	1044	protein_coding	Peptidyl-prolyl cis-trans isomerase 7 [Source:UniProtKB/Swiss-Prot;Acc:P52015]	-
WBGene00011530	136.357	224.028	222.597	71.5936	18.9585	67.2776	194.327	52.6099	1.88414	0.00026087	0.00460836	T06D8.10	II	11240932	11247514	-	4617	protein_coding	-	-
WBGene00007195	468.726	496.882	618.634	825.65	1073.26	1941.93	528.081	1280.28	-1.27721	0.000261043	0.00460836	thoc-7	IV	13882734	13884177	+	770	protein_coding	THO Complex (Transcription factor/nuclear export) subunit [Source:UniProtKB/TrEMBL;Acc:D3YT70]	-
WBGene00010899	500.922	642.405	854.216	387.721	169.573	139.116	665.847	232.137	1.51832	0.000262909	0.00463641	M28.8	II	10628263	10633216	+	2649	protein_coding	-	-
WBGene00020613	40.7176	107.227	91.8213	7.43829	8.42601	26.2268	79.922	14.0304	2.52232	0.000263457	0.00464117	T20D4.7	V	3408912	3409519	+	520	protein_coding	-	-
WBGene00021435	113.631	171.372	151.18	39.9808	18.9585	0	145.394	19.6464	2.87657	0.000264137	0.00464825	Y39A3A.4	III	2073009	2076520	-	996	protein_coding	Tyrosine-protein phosphatase [Source:UniProtKB/TrEMBL;Acc:Q9N520]	-
WBGene00044754	17.0446	2.87215	0	23.2447	45.2898	205.254	6.63891	91.2627	-3.78068	0.000264641	0.00465222	Y119C1B.12	I	4520070	4522768	+	501	protein_coding	-	-
WBGene00304237	34.0892	34.4658	30.6071	89.2595	80.0471	191.57	33.054	120.292	-1.86191	0.000264971	0.00465313	F39B3.7	X	17566667	17567478	-	399	protein_coding	-	-
WBGene00003702	128.781	164.67	202.192	51.1383	24.2248	71.8388	165.215	49.0673	1.75353	0.000268714	0.00471391	nhr-112	V	16722061	16723844	-	1138	protein_coding	Nuclear Hormone Receptor family [Source:UniProtKB/TrEMBL;Acc:O62496]	Miscellaneous
WBGene00008132	3110.64	3615.08	3685.84	2068.77	1999.07	1426.51	3470.52	1831.45	0.921965	0.000271807	0.00476318	gale-1	I	12975183	12978749	+	1322	protein_coding	UDP-glucose 4-epimerase [Source:UniProtKB/Swiss-Prot;Acc:Q564Q1]	-
WBGene00004153	72.913	108.184	147.471	42.7702	20.0118	21.6657	109.523	28.1492	1.95373	0.000273226	0.00478303	pqn-71	V	15465677	15467099	+	1078	protein_coding	Prion-like-(Q/N-rich)-domain-bearing protein [Source:UniProtKB/TrEMBL;Acc:O18118]	-
WBGene00016146	89.9576	154.139	141.906	42.7702	36.8638	46.7522	128.667	42.1287	1.61134	0.000273826	0.00478853	C26F1.1	V	7785417	7787712	+	761	protein_coding	-	-
WBGene00007000	3851.13	3421.69	3683.98	6411.81	8202.72	5638.77	3652.27	6751.1	-0.886341	0.000276013	0.00482171	tufm-1	III	2811870	2814969	-	1976	protein_coding	Elongation factor Tu homologue; TU elongation Factor (EF-Tu), Mitochondrial [Source:UniProtKB/TrEMBL;Acc:G5ECM6]	-
WBGene00021333	367.406	411.675	392.327	194.325	123.23	204.113	390.469	173.89	1.16704	0.000277957	0.00485037	Y34D9A.8	I	1050921	1053826	-	792	protein_coding	-	-
WBGene00018010	60.603	145.522	188.28	13.017	48.4495	22.806	131.468	28.0908	2.2297	0.000278233	0.00485037	F33E11.2	V	297949	300005	+	1018	protein_coding	-	-
WBGene00008740	124.047	178.073	397.892	47.4191	91.6328	58.1552	233.337	65.7357	1.82882	0.00027885	0.00485605	F13D12.5	II	11726814	11728541	+	1484	protein_coding	-	-
WBGene00077491	53.9745	67.0169	73.2715	126.451	175.893	248.585	64.7543	183.643	-1.5022	0.000281431	0.004893	K08H10.10	V	10001118	10002766	+	685	protein_coding	-	-
WBGene00006627	221.58	379.124	441.484	160.853	50.556	117.451	347.396	109.62	1.66264	0.000281557	0.004893	tsp-1	III	8237995	8239423	-	905	protein_coding	Tetraspanin-1 [Source:UniProtKB/Swiss-Prot;Acc:P34285]	-
WBGene00010163	11.3631	40.2101	3.70995	0	0	0	18.4277	0	6.59288	0.00028242	0.00490291	F56H6.2	I	12287199	12289307	+	1122	protein_coding	-	-
WBGene00007885	214.951	196.264	109.444	397.019	432.886	402.525	173.553	410.81	-1.24334	0.000284569	0.00493054	ugt-21	IV	9500311	9502568	+	1687	protein_coding	UDP-glucuronosyltransferase [Source:UniProtKB/TrEMBL;Acc:Q18361]	-
WBGene00012467	71.966	92.8662	47.3019	16.7362	8.42601	0	70.7114	8.38739	3.05461	0.000284602	0.00493054	arrd-8	II	12065085	12067568	+	1095	protein_coding	ARRestin Domain protein [Source:UniProtKB/TrEMBL;Acc:Q9XXI0]	-
WBGene00021541	116.471	233.602	367.285	92.9786	52.6626	70.6985	239.119	72.1132	1.72804	0.000286832	0.00496343	Y42H9B.3	IV	8011031	8012430	-	1153	protein_coding	-	-
WBGene00020858	54.9215	74.6759	153.035	28.8234	5.26626	15.9642	94.211	16.6846	2.49018	0.000287094	0.00496343	mop-25.3	I	10881553	10892189	+	1585	protein_coding	MO25-like protein 3 [Source:UniProtKB/Swiss-Prot;Acc:Q9TZM2]	-
WBGene00003956	2178.87	1999.97	1849.41	5407.64	5915.06	2520.06	2009.42	4614.25	-1.1994	0.0002874	0.00496359	pcp-1	III	7758730	7761273	+	1957	protein_coding	Putative serine protease pcp-1 [Source:UniProtKB/Swiss-Prot;Acc:P34610]	-
WBGene00012344	6877.49	7278.99	7303.97	12153.2	12629.5	11426.9	7153.48	12069.9	-0.754703	0.000287945	0.00496787	ola-1	I	13340327	13343940	+	1412	protein_coding	Obg-like ATPase 1 [Source:UniProtKB/Swiss-Prot;Acc:P91917]	-
WBGene00016567	157.189	170.414	210.54	80.8914	64.2483	67.2776	179.381	70.8058	1.33975	0.000289032	0.00498149	C41D11.9	I	4448576	4449774	-	740	protein_coding	TM2 domain-containing protein C41D11.9 [Source:UniProtKB/Swiss-Prot;Acc:Q95QZ5]	-
WBGene00010628	601.295	726.654	655.734	403.527	275.952	286.215	661.228	321.898	1.03751	0.000289908	0.00499143	ceeh-2	V	10356285	10357903	-	1397	protein_coding	Epoxide hydrolase 2 [Source:UniProtKB/Swiss-Prot;Acc:G5EDL5]	-
WBGene00002008	6216.54	6407.77	4926.81	3758.2	2829.03	2697.94	5850.38	3095.06	0.918429	0.000290852	0.00499995	hsp-4	II	7350121	7352636	-	2214	protein_coding	Endoplasmic reticulum chaperone BiP homolog [Source:UniProtKB/Swiss-Prot;Acc:P20163]	-
WBGene00018160	925.142	1021.53	1055.48	1753.58	1710.48	1807.37	1000.72	1757.14	-0.812165	0.000291001	0.00499995	odr-8	IV	6579840	6582676	-	1986	protein_coding	Ufm1-specific protease [Source:UniProtKB/Swiss-Prot;Acc:Q94218]	-
WBGene00008543	212.11	254.664	262.479	489.068	434.993	550.764	243.085	491.608	-1.01582	0.000291716	0.00500709	F07A5.4	I	7357180	7359100	-	1186	protein_coding	-	-
WBGene00007220	90.9045	35.4232	24.1147	193.396	210.65	149.379	50.1475	184.475	-1.87983	0.00029244	0.00501437	C01B9.1	II	13771575	13779015	+	5042	protein_coding	-	-
WBGene00009580	835.185	737.186	665.936	385.861	431.833	317.003	746.102	378.232	0.979683	0.000293855	0.00503347	xbx-6	V	9703055	9707824	+	1627	protein_coding	X-BoX promoter element regulated [Source:UniProtKB/TrEMBL;Acc:Q8MQ56]	-
WBGene00016392	251.881	324.553	508.263	116.223	185.372	95.785	361.566	132.46	1.44854	0.00029659	0.00507512	sdha-2	I	10683270	10685664	-	2112	protein_coding	Succinate dehydrogenase [ubiquinone] flavoprotein subunit, mitochondrial [Source:UniProtKB/TrEMBL;Acc:O44954]	-
WBGene00007672	136.357	63.1873	75.1265	26.034	18.9585	3.42089	91.5569	16.1378	2.49272	0.000300054	0.00512914	fbxa-136	V	17521037	17527479	+	5666	protein_coding	F-box A protein [Source:UniProtKB/TrEMBL;Acc:G5EF28]	-
WBGene00006066	1284.97	1133.54	1009.11	1898.62	2010.66	2407.17	1142.54	2105.48	-0.881796	0.000301568	0.00514619	sto-4	X	11644143	11647425	+	1437	protein_coding	Stomatin-4 [Source:UniProtKB/Swiss-Prot;Acc:Q22165]	-
WBGene00006628	195.066	259.451	300.506	132.959	70.5678	76.4	251.674	93.3091	1.4285	0.000301667	0.00514619	tsp-2	III	8236984	8237881	-	713	protein_coding	TetraSPanin family [Source:UniProtKB/TrEMBL;Acc:Q95QY8]	-
WBGene00022743	1182.71	984.191	1045.28	1855.85	2048.57	1813.07	1070.72	1905.83	-0.831837	0.000306079	0.00521613	mlt-7	II	4392800	4404850	+	2722	protein_coding	Peroxidase mlt-7 Peroxidase mlt-7 light chain Peroxidase mlt-7 heavy chain [Source:UniProtKB/Swiss-Prot;Acc:Q23490]	-
WBGene00017073	73.8599	99.5679	172.513	27.8936	35.8105	34.2089	115.314	32.6377	1.8229	0.000306643	0.00522042	D2096.6	IV	8368344	8369235	-	705	protein_coding	-	-
WBGene00015912	79.5414	156.054	241.147	19.5255	9.47926	62.7164	158.914	30.5737	2.38451	0.000307727	0.00523355	fbxc-50	II	3246316	3248174	-	1160	protein_coding	F-box C protein [Source:UniProtKB/TrEMBL;Acc:O16541]	-
WBGene00003709	1445	1706.06	1930.1	794.038	839.441	269.11	1693.72	634.196	1.41665	0.000309845	0.00526421	nhr-119	II	2794974	2800600	-	2256	protein_coding	Nuclear Hormone Receptor family [Source:UniProtKB/TrEMBL;Acc:G4SCE4]	RXR-like
WBGene00009084	1986.64	1969.34	2002.45	3087.82	4106.63	3428.88	1986.14	3541.11	-0.834184	0.000311481	0.00528663	F23B12.7	V	14449697	14452971	+	2981	protein_coding	-	-
WBGene00004813	89.0106	228.815	292.159	32.5425	12.639	80.9611	203.328	42.0476	2.27794	0.00031215	0.00529262	skr-7	V	4422406	4423065	+	660	protein_coding	SKR-7; SKp1 Related (Ubiquitin ligase complex component) [Source:UniProtKB/TrEMBL;Acc:G5EDY3]	-
WBGene00015216	209.27	299.661	368.213	106.925	101.112	145.958	292.381	117.999	1.3105	0.000314612	0.00532897	valv-1	IV	7444639	7445432	-	503	protein_coding	-	-
WBGene00235113	11.3631	5.7443	4.63744	49.2787	22.1183	84.382	7.24827	51.9263	-2.83997	0.000316923	0.00536267	ZK105.12	V	7714972	7716090	-	966	protein_coding	-	-
WBGene00001069	132.569	289.13	326.476	118.083	40.0235	30.788	249.392	62.9648	1.98066	0.000319386	0.00539888	dpy-7	X	7536417	7537792	-	1197	protein_coding	Cuticle collagen dpy-7 [Source:UniProtKB/Swiss-Prot;Acc:P34688]	-
WBGene00016177	12.31	18.1903	14.8398	0	0	0	15.1134	0	6.30728	0.000321147	0.00542316	C28C12.1	IV	8501479	8502983	+	769	protein_coding	-	-
WBGene00012652	542.586	475.82	575.97	919.559	1133.3	935.044	531.459	995.967	-0.906043	0.000323165	0.00545067	Y39A1A.14	III	10649519	10650908	+	1053	protein_coding	Ribosomal RNA small subunit methyltransferase nep-1 [Source:UniProtKB/Swiss-Prot;Acc:Q9XX15]	-
WBGene00000685	77.6476	153.181	166.02	34.4021	52.6626	22.806	132.283	36.6235	1.85124	0.000323428	0.00545067	col-111	IV	4655776	4657783	-	1249	protein_coding	COLlagen [Source:UniProtKB/TrEMBL;Acc:U4PM21]	-
WBGene00001975	805.83	810.904	880.186	1277.53	1566.18	1856.4	832.307	1566.71	-0.912271	0.000324054	0.00545572	hmg-5	IV	7644895	7646219	-	808	protein_coding	HMG [Source:UniProtKB/TrEMBL;Acc:Q94234]	HMG
WBGene00022258	296.386	377.209	333.896	172.01	111.645	163.063	335.83	148.906	1.17285	0.000324402	0.00545609	Y73C8B.1	V	3195408	3196882	-	1057	protein_coding	-	-
WBGene00018806	74.8068	125.417	136.341	30.683	37.917	35.3492	112.188	34.6497	1.69639	0.00032542	0.00546771	F54D10.5	II	3807096	3808223	-	977	protein_coding	-	-
WBGene00001502	16223.6	14004.6	13120.2	21598.9	27381.4	29826.8	14449.5	26269	-0.862331	0.000326372	0.0054782	ftt-2	X	11603709	11605451	-	1354	protein_coding	14-3-3-like protein 2 [Source:UniProtKB/Swiss-Prot;Acc:Q20655]	-
WBGene00012887	780.263	816.648	982.209	1456.98	1807.38	1505.19	859.707	1589.85	-0.886892	0.000327505	0.00549171	Y45F10D.7	IV	13788936	13796224	+	3006	protein_coding	-	-
WBGene00012186	365.512	628.044	723.44	305.9	193.798	115.17	572.332	204.956	1.4797	0.000329101	0.00551294	mlt-11	V	20667209	20678513	+	9768	protein_coding	-	-
WBGene00009133	81.4353	160.84	201.265	626.676	640.377	197.272	147.847	488.108	-1.7235	0.000330275	0.00552706	bed-3	IV	9916530	9921996	+	2276	protein_coding	Zinc finger BED domain-containing protein 3 [Source:UniProtKB/Swiss-Prot;Acc:Q19787]	zf-BED
WBGene00007580	152.454	208.71	401.602	49.2787	25.278	115.17	254.255	63.2423	2.01066	0.000330833	0.00553087	C14B1.9	III	3725075	3726500	-	1276	protein_coding	-	-
WBGene00001156	254.722	207.752	128.921	346.81	739.382	467.522	197.132	517.905	-1.39341	0.00033629	0.00561264	ech-7	I	14367608	14369773	-	782	protein_coding	Enoyl-CoA Hydratase [Source:UniProtKB/TrEMBL;Acc:Q9NEZ8]	-
WBGene00008139	53.9745	111.057	64.9241	11.1574	2.1065	22.806	76.6517	12.0233	2.68018	0.000336396	0.00561264	C47D12.5	II	11683479	11685289	-	950	protein_coding	-	-
WBGene00006611	311.537	283.386	339.46	103.206	70.5678	176.746	311.461	116.84	1.41665	0.000340886	0.00568188	tre-5	II	53013	55304	-	2107	protein_coding	Trehalase [Source:UniProtKB/TrEMBL;Acc:G5EG96]	-
WBGene00009722	305.856	246.048	225.38	453.736	501.347	791.367	259.094	582.15	-1.16732	0.000342811	0.00570828	F45D3.2	V	12541040	12542973	+	1542	protein_coding	-	-
WBGene00014039	46.3992	135.949	127.066	26.034	30.5443	17.1045	103.138	24.5609	2.06762	0.00034388	0.00571812	ZK662.2	X	15696700	15698062	+	818	protein_coding	-	-
novel.92	17.0446	30.6363	12.9848	0	1.05325	0	20.2219	0.351084	5.76532	0.000344086	0.00571812	-	II	1558084	1559089	-	960	-	- && - && -	-
WBGene00004015	3264.99	3150.75	3708.1	5838.13	6623.9	5312.65	3374.61	5924.89	-0.812073	0.000346559	0.00575349	phb-2	II	6251411	6252797	+	1151	protein_coding	Mitochondrial prohibitin complex protein 2 [Source:UniProtKB/Swiss-Prot;Acc:P50093]	-
WBGene00000775	229.155	335.084	369.14	702.919	626.684	604.358	311.127	644.654	-1.05116	0.00034959	0.00579612	cpin-1	IV	9451338	9453372	+	1382	protein_coding	CyPIN (Guanine aminohydrolase) homolog [Source:UniProtKB/TrEMBL;Acc:Q20166]	-
WBGene00009033	176.127	165.627	165.093	83.6808	55.8223	55.8746	168.949	65.1259	1.37212	0.000349819	0.00579612	F21H7.12	V	16230203	16231043	+	617	protein_coding	-	-
WBGene00004475	53904.5	52904.1	50531.4	74145.8	100233	128899	52446.6	101093	-0.94675	0.000351234	0.00581298	rps-6	I	13952159	13953194	+	824	protein_coding	40S ribosomal protein S6 [Source:UniProtKB/Swiss-Prot;Acc:Q9NEN6]	-
WBGene00004445	24887	22456.4	20098.7	31308.7	45238.2	71668.9	22480.7	49405.2	-1.13597	0.000351532	0.00581298	rpl-31	I	13652939	13653704	-	683	protein_coding	60S ribosomal protein L31 [Source:UniProtKB/Swiss-Prot;Acc:Q9U332]	-
WBGene00003847	553.949	556.24	675.211	1421.64	1290.23	882.59	595.133	1198.16	-1.00981	0.000353877	0.00584597	blmp-1	I	10409302	10414707	+	3372	protein_coding	B lymphocyte-induced maturation protein 1 homolog [Source:UniProtKB/Swiss-Prot;Acc:Q93560]	zf-C2H2
WBGene00015819	69.1253	72.7612	127.066	18.5957	8.42601	31.9283	89.6508	19.65	2.19503	0.000355662	0.00586965	fbxc-44	II	4236504	4237751	-	985	protein_coding	F-box C protein [Source:UniProtKB/TrEMBL;Acc:A3KFE6]	-
WBGene00000659	13.2569	5.7443	29.6796	0	0	0	16.2269	0	6.41041	0.00035752	0.0058945	col-84	II	11868535	11869688	+	1057	protein_coding	COLlagen [Source:UniProtKB/TrEMBL;Acc:Q21437]	-
WBGene00021721	88.0637	149.352	201.265	37.1915	23.1715	0	146.227	20.121	2.85208	0.000358644	0.0059072	Y49F6B.9	II	3493934	3499426	-	1432	protein_coding	RBR-type E3 ubiquitin transferase [Source:UniProtKB/TrEMBL;Acc:A8DJA7]	-
WBGene00008390	28.4077	40.2101	38.027	100.417	63.1951	299.898	35.5483	154.503	-2.11819	0.000359268	0.00591166	D1086.3	V	14092792	14093986	+	849	protein_coding	-	-
WBGene00019060	1340.84	1676.38	1896.71	874.929	812.057	359.194	1637.98	682.06	1.26336	0.000360964	0.00593373	acox-3	IV	6245341	6248492	-	2075	protein_coding	Acyl-coenzyme A oxidase [Source:UniProtKB/TrEMBL;Acc:Q20992]	-
WBGene00004230	36.9299	79.4629	56.5767	13.9468	3.15975	0	57.6565	5.70218	3.30665	0.000361648	0.00593912	ptr-16	V	1165673	1174969	+	2890	protein_coding	PaTched Related family [Source:UniProtKB/TrEMBL;Acc:A0A0K3ASC2]	-
WBGene00195186	139.197	134.034	122.428	260.34	254.887	382	131.887	299.076	-1.18045	0.000362981	0.00595517	F19G12.10	X	1420699	1423497	+	886	lincRNA	-	-
WBGene00007372	415.699	792.714	561.13	335.653	154.828	107.188	589.848	199.223	1.56379	0.000363504	0.0059579	C06B8.7	V	15498743	15511421	+	9546	protein_coding	-	-
WBGene00004014	3443.95	3276.17	3257.34	5736.78	7157.89	5056.08	3325.82	5983.59	-0.847318	0.000366671	0.00599853	phb-1	I	2071352	2072547	+	1078	protein_coding	Mitochondrial prohibitin complex protein 1 [Source:UniProtKB/Swiss-Prot;Acc:Q9BKU4]	-
WBGene00004469	59476.2	61268.7	58719.2	88489.6	105142	120990	59821.4	104874	-0.809919	0.0003667	0.00599853	rps-0	III	4752998	4754083	-	920	protein_coding	40S ribosomal protein SA [Source:UniProtKB/Swiss-Prot;Acc:P46769]	-
WBGene00012436	79.5414	180.946	214.25	66.0148	12.639	20.5254	158.246	33.0597	2.25155	0.000370113	0.00604531	flh-3	IV	9270096	9271935	+	1581	protein_coding	FLYWCH zinc finger transcription factor homolog [Source:UniProtKB/TrEMBL;Acc:Q9XWQ6]	-
WBGene00021167	224.42	416.462	355.228	131.1	108.485	21.6657	332.037	87.0835	1.9276	0.000370284	0.00604531	cyp-32B1	V	2198059	2201415	-	1586	protein_coding	CYtochrome P450 family [Source:UniProtKB/TrEMBL;Acc:Q9N4Q5]	-
WBGene00021805	61.5499	30.6363	19.4772	5.57872	3.15975	0	37.2211	2.91282	3.6407	0.000381631	0.00622449	Y53G8AM.5	III	3256730	3258395	-	690	protein_coding	-	-
WBGene00004087	1340.84	1130.67	1023.02	1938.6	2102.29	2261.21	1164.84	2100.7	-0.850666	0.00038212	0.0062264	ppk-1	I	5358522	5365170	+	2400	protein_coding	PIP Kinase [Source:UniProtKB/TrEMBL;Acc:O01759]	-
WBGene00017514	170.446	78.5055	89.9663	221.289	269.632	549.624	112.973	346.848	-1.61745	0.000387176	0.00630264	F16F9.3	X	8457614	8459734	+	680	protein_coding	-	-
WBGene00017532	27.4607	71.8038	103.879	11.1574	0	11.403	67.7144	7.52014	3.16906	0.000391309	0.00635954	ent-5	X	4647526	4649197	-	1376	protein_coding	Equilibrative Nucleoside Transporter [Source:UniProtKB/TrEMBL;Acc:Q19495]	-
WBGene00017304	2221.48	2259.43	1846.63	1278.46	1180.69	1107.23	2109.18	1188.79	0.827007	0.000391432	0.00635954	nmad-1	III	5553489	5554934	-	1011	protein_coding	DNA N6-methyl adenine demethylase [Source:UniProtKB/Swiss-Prot;Acc:Q8MNT9]	-
WBGene00017874	3209.12	2963.1	2672.09	1645.72	1772.62	1707.03	2948.1	1708.46	0.78712	0.000395209	0.00641466	acdh-9	II	846864	848603	-	1340	protein_coding	Acyl CoA DeHydrogenase [Source:UniProtKB/TrEMBL;Acc:Q95YB2]	-
WBGene00009692	1055.82	293.917	206.83	1427.22	1872.68	1910	518.855	1736.63	-1.74288	0.000396471	0.0064289	F44E5.5	II	11759640	11761853	+	2105	protein_coding	-	-
WBGene00012581	8.5223	11.4886	25.9697	0	0	0	15.3269	0	6.32796	0.000397845	0.0064405	Y38E10A.3	II	12573940	12574768	-	829	protein_coding	-	-
WBGene00018099	35.0361	97.6532	181.788	23.2447	12.639	0	104.826	11.9612	3.11816	0.000397956	0.0064405	ztf-28	V	2090669	2091735	+	951	protein_coding	Zinc finger putative Transcription Factor family [Source:UniProtKB/TrEMBL;Acc:O76398]	zf-C2H2
WBGene00007646	4566.06	3833.37	3139.55	8217.45	6847.18	6359.44	3846.32	7141.36	-0.89277	0.000401246	0.00648745	nkb-1	I	9431098	9433828	+	2252	protein_coding	Sodium/potassium-transporting ATPase subunit beta-1 [Source:UniProtKB/Swiss-Prot;Acc:Q93235]	-
WBGene00015574	124.994	167.542	175.295	53.9276	38.9703	72.9791	155.944	55.2923	1.49788	0.000404361	0.00653151	irg-1	V	3523587	3524575	+	646	protein_coding	Infection Response protein [Source:UniProtKB/TrEMBL;Acc:O16327]	-
WBGene00000993	1387.24	2234.53	1783.56	1078.55	859.453	678.477	1801.78	872.161	1.04632	0.000407978	0.00658356	dhs-30	X	17230719	17235838	-	1058	protein_coding	DeHydrogenases, Short chain [Source:UniProtKB/TrEMBL;Acc:Q65ZI3]	-
WBGene00003529	71.0191	171.372	216.105	49.2787	23.1715	50.1731	152.832	40.8744	1.90245	0.000411486	0.00663378	nas-10	X	10960982	10964725	-	1861	protein_coding	Zinc metalloproteinase nas-10 [Source:UniProtKB/Swiss-Prot;Acc:Q21388]	-
WBGene00009280	44.5053	91.9089	155.818	21.3851	23.1715	25.0866	97.4107	23.2144	2.07063	0.000412637	0.0066433	F31B9.3	X	15923738	15925169	+	864	protein_coding	-	-
WBGene00018339	2310.49	2446.12	2340.98	4015.75	4304.64	3718.51	2365.86	4012.97	-0.76233	0.000412872	0.0066433	abcf-3	III	6173305	6176171	+	2447	protein_coding	ABC transporter, class F [Source:UniProtKB/TrEMBL;Acc:Q20306]	-
WBGene00007872	111.737	14.3608	8.34739	2.78936	4.213	0	44.815	2.33412	4.24535	0.000414872	0.00666907	C32H11.9	IV	12935011	12936271	-	1150	protein_coding	-	-
WBGene00006359	725.342	661.552	706.746	1085.06	1302.87	1416.25	697.88	1268.06	-0.861312	0.000419187	0.00673196	swp-1	III	5702248	5705464	-	2976	protein_coding	-	-
WBGene00004820	39.7707	103.397	177.15	30.683	23.1715	11.403	106.773	21.7525	2.28923	0.000420108	0.00674028	skr-14	V	4420997	4421596	-	600	protein_coding	SKp1 Related (Ubiquitin ligase complex component) [Source:UniProtKB/TrEMBL;Acc:Q9N3U9]	-
WBGene00001163	640.119	811.862	907.083	1546.23	1538.8	1320.46	786.355	1468.5	-0.901164	0.000421869	0.00676205	efn-2	IV	10576350	10578288	+	957	protein_coding	Eph(F)riN [Source:UniProtKB/TrEMBL;Acc:Q9U3M2]	-
WBGene00017997	887.266	726.654	645.531	1231.04	1371.33	1843.86	753.15	1482.08	-0.97639	0.000426474	0.00681741	mrpl-1	IV	7707575	7709084	-	1244	protein_coding	Mitochondrial Ribosomal Protein, Large [Source:UniProtKB/TrEMBL;Acc:Q7KPW7]	-
WBGene00004816	23.673	82.335	71.4166	9.29786	9.47926	12.5433	59.1415	10.4401	2.50554	0.000426502	0.00681741	skr-10	IV	15946784	15947438	+	655	protein_coding	SKR-10; SKp1 Related (Ubiquitin ligase complex component) [Source:UniProtKB/TrEMBL;Acc:G5EG39]	-
WBGene00016923	56.8153	75.6333	76.9815	9.29786	2.1065	22.806	69.81	11.4034	2.6245	0.000426547	0.00681741	C54F6.5	V	7529116	7529450	+	257	protein_coding	-	-
WBGene00018483	180.862	214.454	294.941	72.5233	60.0353	120.872	230.086	84.4767	1.44813	0.000428333	0.00683941	F45F2.11	V	8519346	8520896	-	1312	protein_coding	-	-
WBGene00009834	62.4968	146.48	223.525	48.3489	7.37276	29.6477	144.167	28.4565	2.3368	0.000430366	0.00686533	lsy-27	V	17348665	17350180	-	1039	protein_coding	-	zf-C2H2
WBGene00020030	951.656	1100.99	1025.8	473.261	383.383	662.513	1026.15	506.386	1.01947	0.000435482	0.00694032	kel-20	I	4182221	4184992	+	1901	protein_coding	KELch-repeat containing protein [Source:UniProtKB/TrEMBL;Acc:O61795]	-
WBGene00009173	90.9045	87.1219	150.253	36.2617	11.5858	35.3492	109.426	27.7322	1.97945	0.000436384	0.00694292	prom-1	I	9287437	9289770	+	1907	protein_coding	PRogression Of Meiosis [Source:UniProtKB/TrEMBL;Acc:G5EDC7]	-
WBGene00010789	168.552	168.5	166.948	79.9616	52.6626	23.9463	168	52.1901	1.68058	0.000436555	0.00694292	sulp-5	V	11880032	11883160	+	2214	protein_coding	SULfate Permease family [Source:UniProtKB/TrEMBL;Acc:O17951]	-
WBGene00010605	9464.48	12537.9	12087	6117.06	6781.88	3505.28	11363.1	5468.07	1.05519	0.000436892	0.00694292	K06G5.1	X	14214939	14219089	+	1665	protein_coding	-	-
WBGene00006617	4689.16	4991.8	5425.8	7537.78	9527.71	9172.56	5035.59	8746.01	-0.79643	0.000438136	0.00695609	tars-1	II	11691326	11695657	-	2544	protein_coding	Threonine--tRNA ligase, cytoplasmic [Source:UniProtKB/Swiss-Prot;Acc:P52709]	-
WBGene00020479	301.121	239.346	334.823	489.068	595.087	719.528	291.763	601.227	-1.04248	0.00044243	0.00701759	T13C2.3	II	6789248	6791782	+	2089	protein_coding	-	-
WBGene00011429	404.336	220.198	168.803	71.5936	47.3963	127.713	264.446	82.2344	1.68729	0.000444328	0.00703743	T04C12.7	V	11054127	11055142	+	680	protein_coding	-	-
WBGene00004385	470.62	530.391	640.894	915.84	998.482	1283.98	547.302	1066.1	-0.961579	0.000444522	0.00703743	rnp-2	IV	4172076	4173988	+	743	protein_coding	RNP (RRM RNA binding domain) containing [Source:UniProtKB/TrEMBL;Acc:Q21322]	-
WBGene00004917	1155.24	1208.22	1442.24	1928.38	2318.21	3735.62	1268.57	2660.73	-1.06842	0.00044536	0.00704401	snr-4	V	11978518	11979970	-	800	protein_coding	Probable small nuclear ribonucleoprotein Sm D2 [Source:UniProtKB/Swiss-Prot;Acc:Q18786]	-
WBGene00019334	903.363	936.321	832.884	1433.73	1660.98	1580.45	890.856	1558.39	-0.806724	0.000447195	0.00706635	K02F3.12	III	856560	860090	+	1953	protein_coding	Putative ATP-dependent DNA helicase Q1 [Source:UniProtKB/Swiss-Prot;Acc:Q9TXJ8]	-
WBGene00003173	608.871	714.208	598.23	1496.96	1601.99	884.871	640.436	1327.94	-1.05234	0.000448972	0.00708774	mec-9	V	9907632	9915103	-	3042	protein_coding	-	-
WBGene00021709	253.775	356.147	402.53	192.466	96.8991	106.048	337.484	131.804	1.35401	0.00045171	0.00712423	ugt-29	V	696523	699614	-	2222	protein_coding	UDP-GlucuronosylTransferase [Source:UniProtKB/TrEMBL;Acc:H2L0C9]	-
WBGene00009045	1125.89	1198.64	1264.17	1880.96	2047.52	2481.29	1196.23	2136.59	-0.836641	0.000452524	0.00713034	F22B5.10	II	8467174	8468010	+	767	protein_coding	Calcium load-activated calcium channel homolog [Source:UniProtKB/Swiss-Prot;Acc:Q19714]	-
WBGene00012074	9.46922	26.8067	39.882	0	2.1065	0	25.386	0.702167	5.19137	0.000453964	0.0071463	T27A8.2	X	16057719	16058934	-	538	protein_coding	-	-
WBGene00015251	1675.1	1419.8	1502.53	898.174	702.518	921.361	1532.48	840.684	0.866231	0.000458806	0.00721573	B0546.4	IV	3382949	3384147	-	1108	protein_coding	Protein yippee-like B0546.4 [Source:UniProtKB/Swiss-Prot;Acc:O44440]	-
WBGene00022075	731.97	710.379	738.28	276.147	368.638	448.137	726.877	364.307	0.997675	0.000459418	0.00721857	Y69A2AR.3	IV	2641310	2642113	+	348	protein_coding	-	-
WBGene00010787	73.8599	124.46	220.742	42.7702	34.7573	5.70149	139.687	27.743	2.32512	0.000461681	0.0072473	K12D12.5	II	11861029	11863420	+	2074	protein_coding	-	-
WBGene00016658	36.9299	60.3152	89.0388	15.8064	3.15975	0	62.0946	6.32204	3.26724	0.000463826	0.0072718	C45B2.1	X	6086124	6086567	+	391	protein_coding	-	-
WBGene00010545	283.13	290.087	181.788	117.153	89.5263	109.469	251.668	105.383	1.25523	0.000464111	0.0072718	cbp-2	III	9923174	9925443	+	1536	protein_coding	CBP/p300 homolog [Source:UniProtKB/TrEMBL;Acc:G5EBG3]	-
WBGene00016003	113.631	110.099	102.951	45.5595	34.7573	19.3851	108.894	33.234	1.70569	0.00046641	0.00730098	C18H9.5	II	6692748	6695566	-	1667	protein_coding	-	-
WBGene00018268	2752.7	2931.51	2936.43	1675.48	1829.5	1335.29	2873.55	1613.42	0.832567	0.000467394	0.00730954	F41C3.2	II	4749968	4751822	+	1745	protein_coding	-	-
WBGene00014698	419.486	256.579	263.407	97.6276	110.591	168.764	313.157	125.661	1.31942	0.000470257	0.00734234	C37A5.3	I	14154769	14155249	-	371	protein_coding	-	-
WBGene00006523	2747.97	3399.67	3148.82	1976.73	1712.59	1400.29	3098.82	1696.53	0.868901	0.00047037	0.00734234	tam-1	V	4958603	4963098	-	3322	protein_coding	Tandem Array expression Modifier; Tandem-array-modifier protein [Source:UniProtKB/TrEMBL;Acc:G5ED20]	-
WBGene00004486	30935.9	29295	31369.5	45146.7	52456.1	61610.3	30533.5	53071	-0.797525	0.000472017	0.00735961	rps-17	I	6220090	6220766	-	468	protein_coding	40S ribosomal protein S17 [Source:UniProtKB/Swiss-Prot;Acc:O01692]	-
WBGene00008229	1734.76	1734.78	1744.6	860.982	1149.1	679.617	1738.05	896.566	0.954827	0.000472509	0.00735961	C50F4.1	V	9526698	9529259	+	1360	protein_coding	-	-
WBGene00020205	43.5584	86.1646	143.761	19.5255	6.31951	27.3671	91.1612	17.7374	2.36442	0.000472797	0.00735961	arrd-1	II	627506	628662	+	1036	protein_coding	ARRestin Domain protein [Source:UniProtKB/TrEMBL;Acc:A0A0M7RDW0]	-
WBGene00012556	234.837	177.116	231.872	375.634	427.62	559.886	214.608	454.38	-1.08144	0.000473334	0.00736112	mrps-10	III	12926557	12927886	+	575	protein_coding	Probable 28S ribosomal protein S10, mitochondrial [Source:UniProtKB/Swiss-Prot;Acc:Q9XWV5]	-
WBGene00007712	279.342	264.238	324.621	463.963	554.01	1070.74	289.4	696.238	-1.26581	0.000475048	0.0073809	mrpl-34	I	10193242	10193999	+	663	protein_coding	Mitochondrial Ribosomal Protein, Large [Source:UniProtKB/TrEMBL;Acc:O02220]	-
WBGene00009218	536.905	708.464	648.314	383.072	173.786	104.907	631.228	220.589	1.51463	0.000475837	0.00738629	acs-20	IV	12392121	12398706	-	2479	protein_coding	Fatty Acid CoA Synthetase family [Source:UniProtKB/TrEMBL;Acc:Q19878]	-
WBGene00271832	87.1168	226.9	153.963	67.8744	29.491	17.1045	155.993	38.1566	2.02426	0.000482479	0.00747681	Y60C6A.3	V	4785804	4786140	+	291	protein_coding	-	-
WBGene00003015	55.8684	39.2527	38.9545	144.117	130.603	103.767	44.6919	126.162	-1.49829	0.000482562	0.00747681	lin-29	II	11917642	11935343	-	2555	protein_coding	Transcription factor [Source:UniProtKB/TrEMBL;Acc:G5EGB2]	zf-C2H2
WBGene00003010	1283.08	1356.61	1549.83	2430.46	2206.56	2767.5	1396.51	2468.18	-0.82154	0.00049087	0.00759848	lin-24	IV	12129504	12135096	+	997	protein_coding	-	-
WBGene00007927	510.391	559.112	594.52	841.457	1055.36	1405.99	554.674	1100.93	-0.988592	0.000491992	0.00760698	C34C12.8	III	3460406	3461590	+	885	protein_coding	GrpE protein homolog, mitochondrial [Source:UniProtKB/Swiss-Prot;Acc:Q18421]	-
WBGene00015159	1979.07	1418.84	1661.13	966.978	876.305	940.746	1686.35	928.009	0.861651	0.000492864	0.00760698	psd-1	III	7268414	7275396	-	1628	protein_coding	Phosphatidylserine decarboxylase proenzyme, mitochondrial Phosphatidylserine decarboxylase beta chain Phosphatidylserine decarboxylase alpha chain [Source:UniProtKB/Swiss-Prot;Acc:Q10949]	-
WBGene00001157	839.92	929.62	865.346	496.506	512.933	330.686	878.295	446.709	0.974677	0.000492991	0.00760698	ech-8	IV	10236626	10239176	-	1449	protein_coding	Enoyl-CoA Hydratase [Source:UniProtKB/TrEMBL;Acc:O17761]	-
WBGene00004509	960.179	1259.92	1074.03	656.429	483.442	599.797	1098.04	579.889	0.920848	0.000493239	0.00760698	rrf-2	I	12098671	12106112	-	4844	protein_coding	RNA-dependent RNA polymerase Family [Source:UniProtKB/TrEMBL;Acc:G5EFA8]	-
WBGene00235092	12.31	13.4034	16.6948	0	0	0	14.136	0	6.21101	0.000494693	0.00762238	C54F6.17	V	7527455	7527955	+	315	protein_coding	-	-
WBGene00000742	1744.23	991.85	1376.39	1635.49	3040.74	8237.51	1370.82	4304.58	-1.65072	0.00049768	0.00765801	col-169	X	6329160	6330127	+	968	protein_coding	COLlagen [Source:UniProtKB/TrEMBL;Acc:Q86NE4]	-
WBGene00021118	38.8238	61.2726	48.2294	8.36808	9.47926	0	49.4419	5.94911	3.03766	0.000497922	0.00765801	clec-125	II	3516008	3518898	+	2088	protein_coding	C-type LECtin [Source:UniProtKB/TrEMBL;Acc:O16642]	-
WBGene00009352	710.191	635.703	723.44	1148.29	1283.91	1204.15	689.778	1212.12	-0.813234	0.000500108	0.00768456	F33A8.4	II	11045786	11049030	-	1904	protein_coding	-	-
WBGene00007919	296.386	311.15	361.72	161.783	92.6861	164.203	323.085	139.557	1.21093	0.000503269	0.00772603	cup-16	II	8707155	8708860	+	1479	protein_coding	-	-
WBGene00008486	273.66	183.818	252.277	87.3999	99.0056	22.806	236.585	69.7372	1.75916	0.000507159	0.00777861	ugt-44	IV	10469741	10471899	+	1820	protein_coding	UDP-GlucuronosylTransferase [Source:UniProtKB/TrEMBL;Acc:O17757]	-
WBGene00008762	145.826	112.971	102.024	250.113	224.342	415.068	120.274	296.508	-1.30095	0.000509729	0.00781085	ztf-2	I	7291272	7293331	+	1843	protein_coding	Zinc finger putative Transcription Factor family [Source:UniProtKB/TrEMBL;Acc:Q19418]	zf-C2H2
WBGene00003958	980.064	1235.03	1299.41	5391.83	5051.39	905.396	1171.5	3782.87	-1.69121	0.000513481	0.00786115	pcp-3	IV	9155079	9159019	-	3365	protein_coding	Prolyl Carboxy Peptidase like [Source:UniProtKB/TrEMBL;Acc:O02252]	-
WBGene00007231	27.4607	14.3608	7.4199	14.8766	71.6211	297.618	16.4138	128.038	-2.96241	0.00051672	0.0079035	C01G10.4	V	15089740	15090021	+	234	protein_coding	-	-
WBGene00003907	945.975	1168.97	1168.63	644.342	623.525	509.713	1094.52	592.527	0.884965	0.000519725	0.00794038	paf-2	X	4291475	4297630	-	1454	protein_coding	Platelet-activating factor acetylhydrolase homolog 2 [Source:UniProtKB/Swiss-Prot;Acc:Q22943]	-
WBGene00015887	1789.68	2217.3	2067.37	1139.92	1268.11	955.57	2024.78	1121.2	0.852574	0.000520081	0.00794038	C17C3.1	II	5570572	5574943	+	2419	protein_coding	-	-
WBGene00021261	26.5138	33.5084	11.1299	1.85957	0	0	23.7174	0.619858	5.1557	0.000521156	0.00794954	Y22D7AR.7	III	1683630	1688099	-	2304	protein_coding	-	-
WBGene00004773	2270.72	2222.09	2168.47	5367.66	4604.81	2988.72	2220.42	4320.4	-0.960445	0.000525225	0.0080043	sem-4	I	7038900	7048832	+	2841	protein_coding	SEM-4 long form [Source:UniProtKB/TrEMBL;Acc:G5EFF4]	zf-C2H2
WBGene00017898	181.809	239.346	340.388	122.732	85.3133	96.9253	253.848	101.657	1.31908	0.000531114	0.00808668	F28C10.3	X	531841	535834	-	1582	protein_coding	-	-
WBGene00019232	2392.87	1701.27	1584.15	643.412	739.382	1229.24	1892.76	870.678	1.12077	0.000534709	0.008134	ugt-13	V	4908868	4911399	+	1638	protein_coding	UDP-GlucuronosylTransferase [Source:UniProtKB/TrEMBL;Acc:Q9TXZ6]	-
WBGene00010111	285.023	226.9	260.624	459.314	513.987	510.853	257.516	494.718	-0.941679	0.00053659	0.0081552	F55D12.2	I	7889310	7894864	+	2590	protein_coding	-	-
WBGene00012007	570.994	359.019	460.961	825.65	961.618	931.623	463.658	906.297	-0.966755	0.000539986	0.00819936	T25B9.1	IV	10748385	10750141	-	1278	protein_coding	-	-
WBGene00009639	28.4077	6.70169	6.49241	119.013	33.704	923.641	13.8673	358.786	-4.69326	0.000545883	0.00828138	nspc-15	X	12360737	12361184	+	401	protein_coding	Nematode Specific Peptide family, group C [Source:UniProtKB/TrEMBL;Acc:G5EC48]	-
WBGene00003517	1435.53	974.617	1098.15	616.448	674.081	396.824	1169.43	562.451	1.05554	0.00054661	0.00828488	nac-1	X	14895145	14898449	+	1932	protein_coding	Sodium-dependent low-affinity dicarboxylate transporter 1 [Source:UniProtKB/Swiss-Prot;Acc:Q93655]	-
WBGene00021415	1600.3	1609.36	1898.57	2689.87	3102.88	3013.81	1702.74	2935.52	-0.785678	0.000548677	0.00829686	nsy-4	IV	2324058	2326739	+	1154	protein_coding	Neuronal SYmmetry [Source:UniProtKB/TrEMBL;Acc:Q9N419]	-
WBGene00022792	391.079	460.502	604.722	835.878	1012.17	990.919	485.434	946.324	-0.962795	0.000548805	0.00829686	ZK686.2	III	7763698	7766052	-	1920	protein_coding	Putative ATP-dependent RNA helicase ZK686.2 [Source:UniProtKB/Swiss-Prot;Acc:P34668]	-
WBGene00016716	4661.7	4732.35	3977.07	2929.76	1815.8	1092.41	4457.04	1945.99	1.19529	0.000548889	0.00829686	acs-17	X	5937506	5944510	-	3019	protein_coding	Fatty Acid CoA Synthetase family [Source:UniProtKB/TrEMBL;Acc:Q18660]	-
WBGene00044687	6.62845	20.1051	16.6948	0	0	0	14.4761	0	6.24517	0.000551125	0.00831857	B0563.9	X	9168539	9169022	+	231	protein_coding	-	-
WBGene00010081	53.0276	71.8038	78.8365	14.8766	14.7455	22.806	67.8893	17.476	1.96272	0.000551321	0.00831857	F55A11.8	V	11788157	11789121	+	785	protein_coding	-	-
WBGene00001398	7027.11	6678.71	5520.41	3429.98	3783.28	1729.83	6408.74	2981.03	1.10411	0.000551858	0.00831917	fat-6	IV	11913691	11915796	-	1582	protein_coding	Delta(9)-fatty-acid desaturase fat-6 [Source:UniProtKB/Swiss-Prot;Acc:G5EGN2]	-
WBGene00006874	1443.11	1349.91	1237.27	2253.8	2237.11	2361.56	1343.43	2284.15	-0.765729	0.000552411	0.00832001	vab-8	V	12213327	12225935	+	3543	protein_coding	Kinesin-like protein vab-8 [Source:UniProtKB/Swiss-Prot;Acc:Q21441]	-
WBGene00007413	1480.99	1512.67	1618.47	2559.7	3174.5	2390.06	1537.37	2708.09	-0.816814	0.000554192	0.00833924	pro-2	II	10339692	10345112	-	2303	protein_coding	Nucleolar complex protein 2 homolog [Source:UniProtKB/Swiss-Prot;Acc:O17580]	-
WBGene00015766	49.2399	76.5907	91.8213	15.8064	23.1715	17.1045	72.5506	18.6941	1.95779	0.000554685	0.00833924	C14C11.2	V	5660928	5663473	+	2007	protein_coding	-	-
WBGene00011498	860.752	919.089	735.498	1359.35	1428.21	1896.32	838.446	1561.29	-0.896769	0.000562688	0.00844904	T05G5.1	III	9739094	9743339	-	1502	protein_coding	-	-
WBGene00009702	172.34	314.979	267.116	132.03	77.9406	77.5402	251.479	95.8368	1.38912	0.000563	0.00844904	F44F4.3	II	10884705	10885878	-	825	protein_coding	-	-
WBGene00000974	32.1953	56.4857	74.199	13.017	5.26626	0	54.2933	6.09442	3.12911	0.00056481	0.0084686	dhs-11	III	10640828	10642872	-	812	protein_coding	DeHydrogenases, Short chain [Source:UniProtKB/TrEMBL;Acc:A0A168H2Z9]	-
WBGene00000746	28.4077	32.5511	69.5616	8.36808	0	0	43.5068	2.78936	3.91299	0.000568287	0.0085131	col-173	X	6875131	6877536	-	1157	protein_coding	COLlagen [Source:UniProtKB/TrEMBL;Acc:Q20270]	-
WBGene00006924	26248.7	23701	23072.2	41162.6	49789.3	36266	24340.6	42406	-0.800905	0.000569049	0.00851689	vig-1	II	1321037	1323170	+	1857	protein_coding	VIG (Drosophila Vasa Intronic Gene) ortholog [Source:UniProtKB/TrEMBL;Acc:H2KYR1]	-
WBGene00011376	139.197	177.116	359.865	86.4701	84.2601	37.6298	225.393	69.4533	1.69581	0.000570853	0.00853493	gla-3	I	8214382	8217998	+	2607	protein_coding	-	-
WBGene00009177	1067.18	1160.35	1138.95	649.921	648.803	646.549	1122.16	648.424	0.79126	0.000571276	0.00853493	F26H9.5	I	9312635	9314488	-	1283	protein_coding	Probable phosphoserine aminotransferase [Source:UniProtKB/Swiss-Prot;Acc:P91856]	-
WBGene00015096	178.021	239.346	243.929	364.476	443.419	692.161	220.432	500.019	-1.18085	0.000575594	0.00859177	B0261.8	I	5271265	5272037	-	660	protein_coding	-	-
WBGene00044344	393.919	382.954	415.514	692.691	902.636	656.812	397.462	750.713	-0.917429	0.000576754	0.0086014	mrpl-39	V	1821579	1823096	+	1011	protein_coding	Mitochondrial Ribosomal Protein, Large [Source:UniProtKB/TrEMBL;Acc:Q4W5T0]	-
WBGene00007711	562.471	940.151	984.064	411.895	432.886	350.071	828.896	398.284	1.05715	0.000581809	0.00866906	lid-1	I	10191273	10192894	-	1386	protein_coding	Abhydrolase domain-containing protein lid-1 [Source:UniProtKB/Swiss-Prot;Acc:O02218]	-
WBGene00013702	85.223	89.9941	52.8668	188.747	133.763	368.316	76.0279	230.275	-1.59804	0.000584022	0.00869428	Y106G6D.6	I	10118081	10119436	-	579	protein_coding	-	-
WBGene00013270	409.07	571.558	710.456	264.989	269.632	280.513	563.695	271.712	1.05305	0.000584926	0.0087	Y57A10A.31	II	12289385	12300573	+	4063	protein_coding	-	-
WBGene00013419	31.2484	63.1873	127.066	17.6659	7.37276	0	73.8339	8.34623	3.1257	0.000586799	0.00872009	Y65A5A.2	IV	16412020	16416808	+	1136	protein_coding	-	-
WBGene00010871	92.7983	104.355	70.4891	180.379	223.289	222.358	89.2141	208.675	-1.22567	0.00059113	0.00877665	M05B5.3	I	7185695	7188298	+	1597	protein_coding	-	-
WBGene00012750	430.849	393.485	318.128	159.923	127.443	224.639	380.821	170.668	1.15904	0.000593766	0.00879516	faah-6	III	11650471	11656185	+	1669	protein_coding	Fatty Acid Amide Hydrolase homolog [Source:UniProtKB/TrEMBL;Acc:Q9U2I8]	-
WBGene00019893	3341.69	3074.16	2936.43	4568.97	5765.5	5849.73	3117.42	5394.73	-0.79114	0.000593855	0.00879516	sgt-1	II	4902288	4903796	-	1325	protein_coding	Small Glutamine-rich Tetratrico repeat protein [Source:UniProtKB/TrEMBL;Acc:Q21746]	-
WBGene00000560	60.603	54.5709	78.8365	15.8064	21.065	9.12238	64.6701	15.3313	2.07267	0.000593955	0.00879516	cnc-6	III	1763524	1764836	+	394	protein_coding	CaeNaCin (Caenorhabditis bacteriocin) [Source:UniProtKB/TrEMBL;Acc:Q9N3V6]	-
WBGene00019488	2447.79	2771.63	2466.19	1332.38	1390.29	1684.22	2561.87	1468.97	0.80259	0.000594956	0.00880219	K07D4.9	II	4028577	4029985	+	421	protein_coding	-	-
WBGene00021350	57343.7	57679.5	57653.6	86220	94151.2	110002	57558.9	96791.1	-0.749832	0.000599719	0.00886482	Y37E3.8	I	2069681	2070607	-	497	protein_coding	-	-
WBGene00011074	35.0361	13.4034	5.56493	53.9276	62.1418	198.412	18.0015	104.827	-2.54083	0.000603216	0.00890153	R07A4.3	X	10754917	10758140	+	912	protein_coding	-	-
WBGene00019959	440.319	545.709	491.568	810.774	940.553	928.202	492.532	893.176	-0.858575	0.000603268	0.00890153	R08E3.3	X	4818599	4821708	+	1957	protein_coding	-	-
WBGene00019967	665.686	778.353	779.09	317.987	288.591	483.486	741.043	363.355	1.02907	0.00060381	0.00890168	cyp-33C8	V	3800782	3803531	-	1656	protein_coding	CYtochrome P450 family [Source:UniProtKB/TrEMBL;Acc:O02641]	-
WBGene00010225	1034.99	967.915	1037.86	1516.48	1784.21	2835.92	1013.59	2045.54	-1.01276	0.000604871	0.00890945	ttr-31	X	11008266	11009070	-	575	protein_coding	TransThyretin-Related family domain [Source:UniProtKB/TrEMBL;Acc:Q93805]	-
WBGene00008417	99.4268	142.65	268.044	69.734	22.1183	47.8925	170.04	46.5816	1.86546	0.000608519	0.0089553	D2030.7	I	7588580	7590565	+	1541	protein_coding	-	-
WBGene00010000	65.3376	172.329	281.956	61.3659	46.343	25.0866	173.208	44.2652	1.96465	0.000610943	0.00898307	F53F8.3	V	20688734	20689532	-	746	protein_coding	-	-
WBGene00011672	717.767	1078.97	1451.52	480.7	314.922	605.498	1082.75	467.04	1.21337	0.000614896	0.00902903	cyp-13A5	II	9798277	9800363	-	1666	protein_coding	Putative cytochrome P450 CYP13A5 [Source:UniProtKB/Swiss-Prot;Acc:Q27514]	-
WBGene00009331	88.0637	214.454	268.971	70.6638	56.8756	57.0149	190.496	61.5181	1.62964	0.000615149	0.00902903	F32D8.7	V	10898435	10900701	+	1655	protein_coding	-	-
WBGene00000933	1080.44	921.003	958.095	1699.65	1902.17	1566.77	986.512	1722.86	-0.804442	0.000617948	0.00905751	dap-3	II	10581133	10582519	+	1242	protein_coding	Mammalian cell Death Associated Protein related [Source:UniProtKB/TrEMBL;Acc:G5EFC8]	-
WBGene00012527	73.8599	110.099	199.41	24.1744	52.6626	27.3671	127.79	34.7347	1.88074	0.000618173	0.00905751	set-22	V	10436912	10441149	+	1334	protein_coding	SET (Trithorax/polycomb) domain containing [Source:UniProtKB/TrEMBL;Acc:Q9XXS2]	-
WBGene00007614	909.045	865.475	817.117	1309.14	1515.63	2092.45	863.879	1639.07	-0.923715	0.000620028	0.00906858	gnrr-2	V	14409078	14411986	+	1231	protein_coding	GoNadotropin-Releasing hormone Receptor (GnRHR) related [Source:UniProtKB/TrEMBL;Acc:Q9XVS5]	-
WBGene00013847	1173.24	1040.68	1130.61	1854.92	1985.38	1835.88	1114.84	1892.06	-0.763111	0.000620553	0.00906858	cls-3	III	9186556	9191127	-	3130	protein_coding	-	-
WBGene00022261	9.46922	18.1903	17.6223	94.8382	62.1418	42.191	15.0939	66.3903	-2.13926	0.000620556	0.00906858	clec-210	V	3118377	3120323	+	1182	protein_coding	C-type LECtin [Source:UniProtKB/TrEMBL;Acc:Q9TXW7]	-
WBGene00012021	36.9299	89.9941	101.096	24.1744	2.1065	7.98208	76.0067	11.421	2.72058	0.000623066	0.00909731	T25E12.6	V	16742423	16744881	+	1164	protein_coding	-	-
WBGene00015591	151.507	242.218	271.754	95.768	62.1418	100.346	221.826	86.0853	1.36567	0.000623874	0.00910115	cyk-7	III	7793446	7795409	-	1086	protein_coding	Cytokinesis defective protein 7 [Source:UniProtKB/Swiss-Prot;Acc:P34325]	-
WBGene00003092	378.769	643.362	652.024	310.549	112.698	215.516	558.052	212.921	1.38905	0.000641784	0.00935426	lys-3	V	10282204	10283544	-	1017	protein_coding	Lysozyme-like protein 3 [Source:UniProtKB/Swiss-Prot;Acc:Q9XXS1]	-
WBGene00008089	1173.24	817.606	1009.11	1459.76	1968.53	2762.94	999.983	2063.74	-1.04505	0.000649595	0.00945843	C44C10.9	X	11713240	11716511	-	1574	protein_coding	-	-
WBGene00018808	34.0892	79.4629	123.356	0	6.31951	20.5254	78.9693	8.94829	3.16097	0.000650062	0.00945843	F54D10.7	II	3820152	3821312	-	896	protein_coding	-	-
WBGene00012456	69.1253	118.716	91.8213	261.27	246.461	175.606	93.2207	227.779	-1.28986	0.000652285	0.00948252	Y17D7C.2	V	18716075	18719944	-	867	protein_coding	-	-
WBGene00000442	22.7261	22.9772	22.2597	76.2425	122.177	51.3134	22.6543	83.2443	-1.87825	0.000657177	0.00954534	ceh-19	IV	7953509	7955898	-	857	protein_coding	Homeobox protein ceh-19 [Source:UniProtKB/Swiss-Prot;Acc:P26797]	Homeobox
WBGene00020152	128.781	157.968	103.879	58.5765	44.2365	34.2089	130.209	45.674	1.50721	0.000658956	0.00956287	nhr-211	V	486990	489104	+	1180	protein_coding	Nuclear Hormone Receptor family [Source:UniProtKB/TrEMBL;Acc:O16965]	Miscellaneous
WBGene00015356	2426.96	2189.54	1714.92	3393.72	4285.68	3736.76	2110.47	3805.38	-0.850463	0.000659562	0.00956336	tag-278	X	3684212	3689205	-	3706	protein_coding	-	-
WBGene00009829	1979.07	2131.14	2090.56	3123.15	3503.11	3921.48	2066.92	3515.92	-0.76633	0.000662297	0.00958748	F47G9.1	V	11323965	11326964	-	950	protein_coding	-	-
WBGene00019692	124.047	112.014	151.18	54.8574	49.5028	41.0507	129.08	48.4703	1.41101	0.000662372	0.00958748	fubl-4	I	5563827	5566265	+	1915	protein_coding	FUBp (FUBP) Like [Source:UniProtKB/TrEMBL;Acc:P91393]	-
WBGene00013311	7705.1	7859.16	8384.49	14554.9	15760.8	11311.8	7982.92	13875.8	-0.797604	0.00066445	0.00960923	sec-61	IV	14822540	14825264	-	2219	protein_coding	Yeast SEC homolog [Source:UniProtKB/TrEMBL;Acc:G3MU88]	-
WBGene00018708	91.8514	10.5312	9.27488	0	4.213	0	37.2192	1.40433	4.73691	0.000665435	0.00961226	oac-32	V	1542517	1545791	-	2154	protein_coding	O-ACyltransferase homolog [Source:UniProtKB/TrEMBL;Acc:A0A0K3AXT9]	-
WBGene00016662	33.1423	47.8692	94.6037	14.8766	3.15975	0	58.5384	6.01211	3.25505	0.000665809	0.00961226	C45B2.8	X	6087985	6088391	+	335	protein_coding	-	-
WBGene00007686	1632.49	1559.58	1776.14	2876.76	3303	2485.85	1656.07	2888.53	-0.802608	0.000666831	0.00961871	tomm-40	II	8971965	8973566	-	1316	protein_coding	Mitochondrial import receptor subunit TOM40 homolog [Source:UniProtKB/Swiss-Prot;Acc:Q18090]	-
WBGene00007402	308.696	231.687	280.101	435.14	749.915	542.782	273.495	575.946	-1.07407	0.000667963	0.00962673	ugt-60	III	9676320	9679051	-	1720	protein_coding	Putative UDP-glucuronosyltransferase ugt-60 [Source:UniProtKB/Swiss-Prot;Acc:P34317]	-
WBGene00271817	156.242	237.431	237.437	66.0148	100.059	22.806	210.37	62.9599	1.73804	0.000672402	0.00968236	F55C12.19	II	5865908	5867041	+	624	protein_coding	-	-
WBGene00001725	165.711	289.13	357.083	60.4361	22.1183	133.415	270.641	71.9897	1.91325	0.000673939	0.00969613	grl-16	I	572177	575120	-	1676	protein_coding	GRound-Like (Grd related) [Source:UniProtKB/TrEMBL;Acc:V6CM29]	-
WBGene00019705	17.0446	40.2101	58.4317	5.57872	5.26626	0	38.5621	3.61499	3.39185	0.000675589	0.00971153	fbxb-45	II	1042969	1044025	-	1008	protein_coding	F-box B protein [Source:UniProtKB/TrEMBL;Acc:Q965L5]	-
WBGene00003729	37.8769	30.6363	64.9241	99.4871	120.071	213.236	44.4791	144.264	-1.69526	0.000678505	0.00974506	nhx-1	X	16017263	16021776	+	1805	protein_coding	Sodium/hydrogen exchanger [Source:UniProtKB/TrEMBL;Acc:G5EDH8]	-
WBGene00015172	2141.94	1825.73	2056.24	1188.27	803.631	1231.52	2007.97	1074.47	0.902111	0.00068177	0.00977545	B0410.3	X	2890612	2891491	-	820	protein_coding	-	-
WBGene00007395	1523.6	1760.63	1511.8	1026.48	877.358	664.794	1598.68	856.212	0.90034	0.000681791	0.00977545	dcar-1	V	17910304	17917241	+	1370	protein_coding	DihydroCaffeic Acid Receptor; L-3,4-dihydroxyphenylalanine receptor [Source:UniProtKB/TrEMBL;Acc:G5EDI0]	-
WBGene00012858	274.607	272.854	264.334	413.755	601.406	578.131	270.599	531.097	-0.972294	0.000685097	0.00981443	Y44F5A.1	III	4244858	4247671	-	1341	protein_coding	3E324 [Source:UniProtKB/TrEMBL;Acc:G5EEZ4]	-
WBGene00011248	476.302	490.181	428.499	810.774	901.583	777.683	464.994	830.013	-0.836007	0.000685854	0.00981688	R11D1.10	V	12729520	12731801	+	1279	protein_coding	-	-
WBGene00010637	79.5414	183.818	166.948	62.2957	38.9703	27.3671	143.436	42.8777	1.73716	0.000687167	0.00982679	K07F5.12	IV	9856012	9858067	+	1143	protein_coding	-	-
WBGene00003422	1134.41	1406.4	1393.09	794.038	758.341	634.006	1311.3	728.795	0.847089	0.000687722	0.00982679	msh-6	I	3449326	3462177	+	3667	protein_coding	MSH (MutS Homolog) family [Source:UniProtKB/TrEMBL;Acc:Q9N3T8]	-
WBGene00008688	1005.63	1065.57	1005.4	1461.62	2026.45	2073.06	1025.53	1853.71	-0.853846	0.00068839	0.00982793	rbm-34	IV	12085423	12087060	+	1280	protein_coding	RNA Binding Motif protein homolog [Source:UniProtKB/TrEMBL;Acc:Q95QL3]	-
WBGene00009326	31.2484	27.7641	51.0118	104.136	134.816	95.785	36.6748	111.579	-1.60453	0.0006892	0.00983109	F32D8.1	V	10880837	10883399	+	1130	protein_coding	-	-
WBGene00011087	84.276	113.929	230.017	28.8234	41.0768	55.8746	142.741	41.9249	1.77155	0.000692531	0.00987019	R07B7.2	V	12056575	12059747	-	2115	protein_coding	-	-
WBGene00012628	137.304	163.713	171.585	372.844	348.626	266.83	157.534	329.433	-1.06496	0.000694383	0.00988816	Y38H6C.16	V	20536430	20538155	-	713	protein_coding	-	-
WBGene00006464	163.817	224.028	160.455	80.8914	73.7276	77.5402	182.767	77.3864	1.23938	0.000698363	0.00993636	bath-47	II	1601789	1604618	+	2196	protein_coding	BTB and MATH domain-containing protein 47 [Source:UniProtKB/Swiss-Prot;Acc:O76612]	-
WBGene00002077	6498.72	6746.68	6820.74	9694.88	13489	11408.7	6688.72	11530.8	-0.785677	0.000707419	0.0100567	imb-3	I	310981	314989	-	3710	protein_coding	IMportin Beta family [Source:UniProtKB/TrEMBL;Acc:Q9N5V3]	-
WBGene00008528	338.998	325.511	295.869	515.102	554.01	1268.01	320.126	779.041	-1.28251	0.00071572	0.010166	F02E9.1	I	8406828	8407645	+	619	protein_coding	-	-
WBGene00004888	2809.52	3179.47	4060.54	4998.53	6197.33	8211.28	3349.84	6469.05	-0.949381	0.000717347	0.0101805	smo-1	I	1340678	1341258	+	475	protein_coding	Small ubiquitin-related modifier [Source:UniProtKB/Swiss-Prot;Acc:P55853]	-
WBGene00021213	64.3907	156.054	179.933	25.1042	21.065	58.1552	133.459	34.7748	1.9455	0.000720189	0.0102121	Y18H1A.9	I	748228	757010	-	1808	protein_coding	-	-
WBGene00021158	164.764	159.883	159.528	51.1383	61.0886	7.98208	161.392	40.0696	2.0053	0.000721118	0.0102167	Y4C6B.4	IV	5326444	5329640	+	1927	protein_coding	-	-
WBGene00015823	2362.57	2270.91	1976.48	1006.03	1516.68	928.202	2203.32	1150.3	0.937644	0.000722632	0.0102294	C16B8.3	X	3968036	3968637	-	602	protein_coding	-	-
WBGene00044612	249.987	219.241	230.017	84.6106	102.165	127.713	233.082	104.83	1.15506	0.000729162	0.0103131	Y57E12AR.1	V	7063703	7065322	-	414	protein_coding	-	-
WBGene00022026	695.987	688.359	580.607	397.949	342.307	313.582	654.985	351.279	0.898121	0.000730396	0.0103132	Y65B4A.2	I	638129	653986	+	1769	protein_coding	-	-
WBGene00010446	270.82	354.232	473.946	73.4531	58.9821	216.657	366.333	116.364	1.65738	0.000730477	0.0103132	K01A6.4	IV	11739095	11740284	-	855	protein_coding	-	-
WBGene00010582	1132.52	1246.51	1314.25	2128.28	2128.62	1976.14	1231.09	2077.68	-0.755066	0.000731017	0.0103132	K05C4.5	I	14742765	14747789	+	2181	protein_coding	-	-
WBGene00004677	3131.47	32248.5	2037.69	675.025	1105.91	405.946	12472.6	728.962	4.09674	0.000733082	0.0103336	rrn-3.56	I	15060299	15061150	+	852	pseudogene	-	-
WBGene00004363	524.595	503.584	436.847	858.193	895.263	840.399	488.342	864.619	-0.824247	0.000737049	0.0103808	ric-3	IV	7818251	7821195	+	1598	protein_coding	Resistance to inhibitors of cholinesterase protein 3 [Source:UniProtKB/Swiss-Prot;Acc:Q22472]	-
WBGene00015074	2894.74	3140.22	3321.33	1986.95	1789.47	1825.62	3118.76	1867.35	0.739916	0.000751899	0.0105756	natc-2	V	5274074	5275615	+	1099	protein_coding	N-alpha-AcetylTransferase C complex subunit [Source:UniProtKB/TrEMBL;Acc:O16486]	-
WBGene00044396	445.053	458.587	501.771	286.374	229.609	197.272	468.47	237.751	0.977219	0.000752146	0.0105756	ZK1290.14	II	7554092	7554844	-	588	protein_coding	-	-
WBGene00022179	36.9299	44.0397	35.2445	122.732	114.804	87.8029	38.738	108.446	-1.48652	0.000754339	0.0105975	Y71H2AM.14	III	2743719	2746653	-	1322	protein_coding	-	-
WBGene00015425	192.225	179.988	240.219	370.055	378.117	500.591	204.144	416.254	-1.02717	0.000755473	0.0106045	C04E6.11	V	5914097	5917891	-	3199	protein_coding	-	-
WBGene00255704	15.1507	14.3608	10.2024	0	0	0	13.238	0	6.11607	0.000765663	0.0107386	B0348.10	V	8575	8739	-	165	protein_coding	-	-
WBGene00004414	120087	106140	113405	165039	204211	197574	113211	188941	-0.738926	0.000766563	0.0107422	rpl-3	III	3867852	3869587	+	1458	protein_coding	60S ribosomal protein L3 [Source:UniProtKB/Swiss-Prot;Acc:P50880]	-
WBGene00012465	332.37	340.829	340.388	508.593	845.761	651.11	337.862	668.488	-0.984144	0.000767692	0.010749	Y17G7B.12	II	12023861	12025932	+	905	protein_coding	-	-
WBGene00009443	100.374	83.2924	89.9663	148.766	220.129	324.985	91.2108	231.293	-1.34094	0.0007685	0.0107513	F35G12.7	III	4586628	4587330	-	567	protein_coding	-	-
WBGene00017199	34.0892	12.446	1.85498	0	0	0	16.13	0	6.401	0.000770168	0.0107656	clec-45	V	7638105	7638622	+	468	protein_coding	C-type LECtin [Source:UniProtKB/TrEMBL;Acc:P91214]	-
WBGene00016457	224.42	712.294	709.528	245.464	49.5028	165.343	548.747	153.437	1.83754	0.000772339	0.0107869	C35E7.5	I	10823363	10828454	+	4367	protein_coding	-	-
WBGene00013998	488.612	604.109	952.53	362.617	310.709	270.251	681.75	314.525	1.11555	0.000777929	0.0108475	gtf-2E1	IV	17255301	17257562	+	1629	protein_coding	General Transcription Factor homolog; TFIIE-alpha protein [Source:UniProtKB/TrEMBL;Acc:G5EG49]	-
WBGene00018866	1152.4	1119.18	1291.06	1990.67	2792.17	1811.93	1187.55	2198.26	-0.888371	0.000777976	0.0108475	nath-10	I	5349646	5353767	-	3267	protein_coding	RNA cytidine acetyltransferase [Source:UniProtKB/Swiss-Prot;Acc:O01757]	-
WBGene00016453	153.401	252.749	375.633	128.311	69.5146	84.382	260.594	94.069	1.46818	0.0007838	0.0109196	vet-2	I	10846777	10850103	+	2476	protein_coding	Very Early Transcript [Source:UniProtKB/TrEMBL;Acc:H1ZUW7]	-
WBGene00007964	264.191	279.556	358.938	728.953	877.358	410.507	300.895	672.273	-1.16008	0.000787359	0.0109601	cyp-25A2	III	3835221	3837211	+	1570	protein_coding	CYtochrome P450 family [Source:UniProtKB/TrEMBL;Acc:Q27476]	-
WBGene00000562	148.667	178.073	131.703	70.6638	56.8756	59.2955	152.814	62.2783	1.29341	0.000800088	0.011128	cng-1	V	15025740	15031473	-	2799	protein_coding	Cyclic Nucleotide Gated channel [Source:UniProtKB/TrEMBL;Acc:A8WI01]	-
WBGene00011707	158.136	372.422	346.88	61.3659	114.804	134.555	292.48	103.575	1.50008	0.000800879	0.0111297	T11B7.2	IV	8843621	8844491	-	285	protein_coding	-	-
WBGene00021638	397.707	427.951	428.499	587.625	838.388	1217.84	418.052	881.284	-1.07537	0.000804968	0.0111671	Y47G6A.9	I	3479329	3481439	+	783	protein_coding	-	-
WBGene00011705	263.244	301.576	241.147	151.555	117.964	93.5044	268.656	121.008	1.14826	0.000804995	0.0111671	clp-9	V	9882034	9885960	-	2543	protein_coding	CaLPain family [Source:UniProtKB/TrEMBL;Acc:G5EEZ6]	-
WBGene00022112	24.62	92.8662	90.8938	12.0872	13.6923	0	69.46	8.59316	3.00302	0.00080557	0.0111671	Y71F9AL.7	I	2887800	2889434	+	934	protein_coding	-	-
WBGene00014244	981.011	1182.37	921.923	1892.12	2100.18	1556.51	1028.43	1849.6	-0.846895	0.000808479	0.0111981	ZK1307.1	II	9654345	9655616	-	1011	protein_coding	-	-
WBGene00018438	35.983	127.332	155.818	26.9638	14.7455	31.9283	106.378	24.5459	2.11662	0.000809967	0.0112083	btb-6	II	1715162	1716497	+	1191	protein_coding	BTB (Broad/complex/Tramtrack/Bric a brac) domain protein [Source:UniProtKB/TrEMBL;Acc:O16741]	-
WBGene00009113	109.843	205.838	319.056	63.2255	60.0353	92.3641	211.579	71.875	1.55943	0.000811011	0.0112083	maph-1.2	I	10418234	10421858	-	2879	protein_coding	Microtubule-Associated Protein Homolog [Source:UniProtKB/TrEMBL;Acc:A9UJN7]	-
WBGene00044728	6373.73	6105.24	5691.99	3224.5	2854.31	4195.16	6056.99	3424.66	0.822725	0.000811221	0.0112083	Y53F4B.45	II	15042805	15044011	-	1207	ncRNA	-	-
WBGene00010019	247.147	316.894	270.826	33.4723	17.9053	149.379	278.289	66.9189	2.06045	0.000812166	0.011212	F54B8.4	V	15816464	15817143	+	397	protein_coding	-	-
WBGene00021351	2296.29	2309.21	2415.18	4188.69	4651.16	3333.09	2340.22	4057.64	-0.794049	0.000815191	0.0112445	eif-2alpha	I	2072680	2076906	+	1547	protein_coding	Eukaryotic Initiation Factor [Source:UniProtKB/TrEMBL;Acc:Q9BKU3]	-
WBGene00007116	300.174	260.408	203.12	567.17	414.981	563.307	254.567	515.153	-1.01713	0.000817627	0.0112688	B0198.3	X	12042593	12057049	-	3471	protein_coding	-	-
WBGene00017065	1407.13	1144.07	1226.14	2046.46	2354.02	2075.34	1259.11	2158.61	-0.777671	0.00081934	0.0112831	D2092.4	I	6612188	6615990	-	1451	protein_coding	-	-
WBGene00012163	23.673	12.446	5.56493	0	0	0	13.8947	0	6.18581	0.000820978	0.0112961	VZK822L.2	IV	11912005	11913245	+	419	protein_coding	-	-
WBGene00000204	918.514	974.617	1009.11	1646.65	1722.07	1528	967.412	1632.24	-0.754693	0.000821636	0.0112961	arx-6	III	4878658	4879643	+	756	protein_coding	Probable actin-related protein 2/3 complex subunit 4 [Source:UniProtKB/Swiss-Prot;Acc:P58798]	-
WBGene00003612	211.164	261.366	259.697	114.364	86.3666	129.994	244.075	110.241	1.14721	0.000825982	0.0113466	nhr-13	V	2192477	2196823	+	1422	protein_coding	Nuclear hormone receptor family member nhr-13 [Source:UniProtKB/Swiss-Prot;Acc:Q9N4Q7]	ESR-like
WBGene00000088	1023.62	1600.75	1516.44	747.548	735.169	337.528	1380.27	606.749	1.1852	0.000829823	0.01139	aex-5	I	14850054	14855827	-	1796	protein_coding	Endoprotease aex-5 [Source:UniProtKB/Swiss-Prot;Acc:P91863]	-
novel.27	11.3631	0.957384	0.927488	31.6127	53.7158	42.191	4.41598	42.5065	-3.26729	0.000830601	0.0113913	-	I	13230112	13231899	+	1788	-	- && - && -	-
WBGene00008151	1073.81	1057.91	1084.23	1838.19	2047.52	1615.8	1071.98	1833.84	-0.77465	0.000832091	0.011402	rrp-1	IV	9980724	9982276	-	1323	protein_coding	Ribosomal RNA processing protein 1 homolog [Source:UniProtKB/Swiss-Prot;Acc:Q18674]	-
WBGene00002025	4611.51	4805.11	5177.24	10442.4	11474.1	6216.9	4864.62	9377.82	-0.946962	0.000832744	0.011402	hsp-60	III	1619742	1625797	+	2117	protein_coding	Chaperonin homolog Hsp-60, mitochondrial [Source:UniProtKB/Swiss-Prot;Acc:P50140]	-
WBGene00022683	283.13	190.519	197.555	329.144	569.809	604.358	223.735	501.104	-1.16267	0.000834435	0.011413	ZK185.3	IV	4528730	4530382	-	1019	protein_coding	-	-
WBGene00003172	2016.94	1669.68	1902.28	3322.13	3296.68	2853.03	1862.97	3157.28	-0.761129	0.000834913	0.011413	mec-8	I	9441010	9450731	-	1898	protein_coding	Mec-8 protein [Source:UniProtKB/TrEMBL;Acc:G5ECJ4]	-
WBGene00004400	183.703	228.815	258.769	120.872	63.1951	90.0835	223.762	91.3836	1.29006	0.000837038	0.0114327	rom-1	III	4907217	4908968	+	1226	protein_coding	Rhomboid-related protein 1 [Source:UniProtKB/Swiss-Prot;Acc:Q19821]	-
WBGene00009781	336.157	232.644	245.784	459.314	559.276	598.656	271.529	539.082	-0.989013	0.00083919	0.0114527	F46C5.6	II	8840200	8844515	-	2937	protein_coding	-	-
WBGene00013892	525.542	561.027	646.459	855.404	1100.65	1307.92	577.676	1087.99	-0.912931	0.000840446	0.0114605	ZC434.4	I	10331945	10333082	-	935	protein_coding	Ribosomal RNA-processing protein 7 homolog [Source:UniProtKB/Swiss-Prot;Acc:Q23314]	-
WBGene00017657	2156.14	1843.92	1391.23	3318.41	4083.45	2801.71	1797.1	3401.19	-0.920426	0.000841312	0.011463	F21C10.7	V	9112767	9122180	+	7923	protein_coding	-	-
WBGene00012405	19.8854	85.2072	112.226	13.017	4.213	18.2448	72.4395	11.8249	2.61794	0.00084271	0.0114727	ztf-25	V	17601820	17602954	+	1010	protein_coding	Zinc finger putative Transcription Factor family [Source:UniProtKB/TrEMBL;Acc:O01709]	zf-C2H2
WBGene00004804	3475.2	2300.59	1916.19	4887.89	4795.45	5036.7	2564	4906.68	-0.936361	0.00084493	0.0114935	skn-1	IV	5651087	5660523	-	3275	protein_coding	-	TF_bZIP
WBGene00004814	30.3015	111.057	141.906	25.1042	9.47926	0	94.4212	11.5278	3.01886	0.000847853	0.0115164	skr-8	IV	17165191	17165855	-	665	protein_coding	SKR-8; SKp1 Related (Ubiquitin ligase complex component) [Source:UniProtKB/TrEMBL;Acc:G5ECY4]	-
WBGene00001577	374.034	634.746	784.655	307.759	167.467	280.513	597.811	251.913	1.24648	0.000847988	0.0115164	gem-4	IV	11745640	11748640	+	1966	protein_coding	Gon-2 Extragenic Modifier [Source:UniProtKB/TrEMBL;Acc:Q22422]	-
WBGene00013898	2262.2	2057.42	2071.08	1455.12	922.648	620.322	2130.23	999.362	1.09137	0.00084886	0.0115189	ZC443.3	V	12812258	12814122	-	1560	protein_coding	-	-
WBGene00009161	3667.43	3048.31	3109.87	1138.06	1911.65	2016.05	3275.2	1688.59	0.956041	0.000856829	0.0116176	cox-7C	I	9773172	9774012	+	389	protein_coding	Cytochrome OXidase assembly protein [Source:UniProtKB/TrEMBL;Acc:O18687]	-
WBGene00020375	463.992	792.714	1264.17	450.946	310.709	236.042	840.29	332.566	1.33644	0.000857703	0.01162	pigv-1	I	6185462	6188121	+	2326	protein_coding	GPI mannosyltransferase pigv-1 [Source:UniProtKB/Swiss-Prot;Acc:O02164]	-
WBGene00004484	39858.8	36125	36997.5	52194.5	66140	97846.7	37660.4	72060.4	-0.93615	0.000869607	0.0117717	rps-15	I	8815554	8816193	-	510	protein_coding	40S ribosomal protein S15 [Source:UniProtKB/Swiss-Prot;Acc:Q9XVP0]	-
WBGene00017843	87.1168	148.395	204.975	43.7	17.9053	62.7164	146.829	41.4405	1.82706	0.000870878	0.0117794	F26G5.1	V	4975485	4977502	+	1788	protein_coding	-	-
WBGene00022279	593.72	425.078	544.435	864.701	932.127	1109.51	521.078	968.779	-0.894371	0.000873534	0.0118058	sesn-1	I	27591	32544	-	2176	protein_coding	Sestrin homolog [Source:UniProtKB/Swiss-Prot;Acc:Q9N4D6]	-
WBGene00006212	8.5223	3.82954	5.56493	46.4893	54.7691	18.2448	5.97225	39.8344	-2.73925	0.000875532	0.0118232	str-168	IV	4939315	4941506	+	1168	protein_coding	Seven TM Receptor [Source:UniProtKB/TrEMBL;Acc:Q9N2T0]	-
WBGene00003163	2910.84	1380.55	1737.18	3440.21	4216.16	5070.9	2009.52	4242.43	-1.07797	0.000883112	0.011916	mdl-1	X	6742351	6743899	+	1211	protein_coding	MAD-Like; MAD-like-1 homolog [Source:UniProtKB/TrEMBL;Acc:G5EG44]	bHLH
WBGene00011335	45.4522	49.784	41.7369	128.311	105.325	120.872	45.6577	118.169	-1.37244	0.000884754	0.0119201	T01E8.8	II	10231272	10236014	+	1161	protein_coding	-	-
WBGene00022122	4564.16	4714.16	4729.26	7197.48	8456.55	7318.43	4669.19	7657.49	-0.713691	0.000884848	0.0119201	trap-1	I	2928395	2929687	+	1112	protein_coding	TRanslocon-Associated Protein [Source:UniProtKB/TrEMBL;Acc:Q95XT5]	-
WBGene00011475	35.983	82.335	79.7639	18.5957	4.213	15.9642	66.0273	12.9243	2.34969	0.000886142	0.011928	T05D4.2	III	13561729	13563082	-	1186	protein_coding	-	-
WBGene00020083	9.46922	34.4658	29.6796	72.5233	52.6626	229.2	24.5382	118.129	-2.26562	0.000888302	0.0119452	R57.2	X	297234	299287	+	775	protein_coding	-	-
WBGene00016702	124.047	161.798	233.727	67.8744	66.3548	70.6985	173.191	68.3092	1.34261	0.000888958	0.0119452	C46A5.6	IV	7760000	7763848	-	1087	protein_coding	-	-
WBGene00002200	438.425	396.357	367.285	715.006	729.903	689.88	400.689	711.596	-0.828666	0.000889567	0.0119452	kin-16	II	9434021	9436120	-	1679	protein_coding	Receptor-like tyrosine-protein kinase kin-16 [Source:UniProtKB/Swiss-Prot;Acc:P34892]	-
WBGene00010849	99.4268	79.4629	79.7639	189.676	152.721	304.46	86.2179	215.619	-1.32144	0.00089304	0.0119822	M04B2.7	IV	11530650	11548586	-	1096	protein_coding	-	-
WBGene00014667	100.374	136.906	285.666	70.6638	44.2365	12.5433	174.315	42.4812	2.03118	0.000901264	0.0120829	C06A1.4	II	10574842	10578193	-	2896	pseudogene	-	-
WBGene00021558	313.431	252.749	255.987	424.912	524.519	787.946	274.056	579.126	-1.07871	0.000903294	0.0120909	Y45G5AM.6	V	4147550	4152296	-	1290	protein_coding	-	-
WBGene00004428	43388	45875	43223.7	59299	83605	92189.7	44162.2	78364.5	-0.827383	0.000903314	0.0120909	rpl-16	III	3502841	3503724	-	785	protein_coding	60S ribosomal protein L13a [Source:UniProtKB/Swiss-Prot;Acc:Q27389]	-
WBGene00005655	1472.46	1692.65	1705.65	1075.76	801.524	883.731	1623.59	920.339	0.818664	0.000905608	0.012112	srr-4	V	5019224	5022369	+	1446	protein_coding	Serpentine Receptor, class R [Source:UniProtKB/TrEMBL;Acc:H2KYR4]	-
WBGene00015075	1281.19	1456.18	1521.08	2008.34	2593.1	3325.11	1419.48	2642.18	-0.896179	0.000909379	0.0121453	B0238.11	V	5269485	5270744	+	1119	protein_coding	-	-
WBGene00010808	38.8238	175.201	190.135	41.8404	29.491	29.6477	134.72	33.6597	1.99882	0.000909551	0.0121453	sepa-1	I	13298209	13300716	-	2216	protein_coding	-	-
WBGene00004987	1443.11	718.995	814.334	558.802	439.206	305.6	992.146	434.536	1.19035	0.000913993	0.0121948	spp-2	X	7315995	7316818	-	492	protein_coding	SaPosin-like Protein family [Source:UniProtKB/TrEMBL;Acc:Q8MPX7]	-
WBGene00016147	513.232	626.129	621.417	369.125	245.407	289.636	586.926	301.389	0.960745	0.000927504	0.0123652	cyp-32A1	V	7781811	7784595	+	1692	protein_coding	CYtochrome P450 family [Source:UniProtKB/TrEMBL;Acc:Q27472]	-
WBGene00003770	38.8238	112.014	105.734	23.2447	11.5858	0	85.5238	11.6101	2.86608	0.000933026	0.0124289	nlp-32	III	486123	486547	-	378	protein_coding	Neuropeptide-like protein 32 YGGWG-amide GGW-amide GG-amide GYG-amide GGGWG-amide GGGW-amide GGG-amide GFYGG-amide GW-amide [Source:UniProtKB/Swiss-Prot;Acc:Q09982]	-
WBGene00002019	364.565	75.6333	116.863	771.723	625.631	403.665	185.687	600.34	-1.69319	0.000936268	0.0124622	hsp-16.48	V	9088131	9088617	+	432	protein_coding	Heat shock protein Hsp-16.48/Hsp-16.49 [Source:UniProtKB/Swiss-Prot;Acc:P02513]	-
WBGene00008781	584.251	673.998	780.017	1601.09	1652.55	896.274	679.422	1383.31	-1.02596	0.000937777	0.0124724	rpoa-2	I	9280963	9286577	-	3745	protein_coding	DNA-directed RNA polymerase subunit beta [Source:UniProtKB/TrEMBL;Acc:Q27493]	-
WBGene00022357	195.066	260.408	394.182	47.4191	128.497	122.012	283.219	99.3092	1.51467	0.000940553	0.0124898	kbp-4	III	1080901	1081300	+	355	protein_coding	KNL (Kinetochore null) Binding Protein [Source:UniProtKB/TrEMBL;Acc:Q9N2X3]	-
WBGene00003927	2067.13	2459.52	2655.4	3763.78	3987.61	4515.58	2394.02	4088.99	-0.772245	0.000940581	0.0124898	pas-6	V	5583161	5584343	-	989	protein_coding	Proteasome subunit alpha type-1 [Source:UniProtKB/Swiss-Prot;Acc:O44156]	-
WBGene00022142	55.8684	86.1646	119.646	16.7362	11.5858	36.4895	87.2263	21.6038	2.02043	0.000942759	0.0125088	Y71G12B.2	I	1816150	1818496	+	966	protein_coding	-	-
WBGene00019164	244.306	221.156	203.12	452.806	461.324	368.316	222.86	427.482	-0.940163	0.000943969	0.0125149	H06H21.8	IV	4817388	4821131	-	1358	protein_coding	-	-
WBGene00017749	624.021	601.237	643.676	918.629	1195.44	1197.31	622.978	1103.79	-0.824925	0.000947778	0.0125554	rpoa-49	II	45040	47479	+	1412	protein_coding	RNA POlymerase I (A) subunit [Source:UniProtKB/TrEMBL;Acc:Q95X83]	-
WBGene00004204	3280.14	3193.83	2789.88	5345.34	5547.47	4612.5	3087.95	5168.44	-0.743124	0.000948602	0.0125564	swsn-4	IV	11126024	11131162	+	4813	protein_coding	SWI/SNF nucleosome remodeling complex component; SWI2/SNF2-like protein [Source:UniProtKB/TrEMBL;Acc:G5EF53]	-
WBGene00003183	535.011	826.222	1178.84	408.176	394.969	386.561	846.69	396.569	1.09423	0.000950128	0.0125666	mei-1	I	8294881	8296940	+	1645	protein_coding	Meiotic spindle formation protein mei-1 [Source:UniProtKB/Swiss-Prot;Acc:P34808]	-
WBGene00018437	3.78769	24.892	27.8246	0.929786	0	0	18.8348	0.309929	5.66326	0.000954691	0.012617	btb-8	II	1722770	1724186	+	1143	protein_coding	BTB (Broad/complex/Tramtrack/Bric a brac) domain protein [Source:UniProtKB/TrEMBL;Acc:O16744]	-
WBGene00003602	1045.4	1450.44	1351.35	886.086	384.437	362.615	1282.4	544.379	1.23523	0.000960393	0.0126823	nhr-3	X	14558504	14561425	+	1737	protein_coding	Nuclear hormone receptor family member nhr-3 [Source:UniProtKB/Swiss-Prot;Acc:Q9XTJ4]	RXR-like
WBGene00017549	43.5584	76.5907	80.6914	22.3149	16.852	9.12238	66.9468	16.0964	2.04797	0.000962505	0.0127002	pid-1	II	7689710	7690572	-	675	protein_coding	21U-RNA biogenesis factor pid-1 [Source:UniProtKB/Swiss-Prot;Acc:Q19541]	-
WBGene00003083	320.06	448.056	593.592	257.551	179.053	180.167	453.902	205.59	1.14157	0.000964334	0.0127143	lst-1	I	10588177	10590464	+	1708	protein_coding	Lateral Signaling Target [Source:UniProtKB/TrEMBL;Acc:P91820]	-
WBGene00006811	1210.17	991.85	1038.79	1987.88	1805.27	1733.25	1080.27	1842.14	-0.77009	0.000965209	0.0127158	unc-79	III	4066717	4082794	+	6605	protein_coding	Uncoordinated protein 79 [Source:UniProtKB/Swiss-Prot;Acc:P42173]	-
WBGene00011292	3817.04	5083.71	4616.11	2680.57	2208.67	2853.03	4505.62	2580.76	0.803948	0.000977626	0.0128692	allo-1	IV	10695309	10697071	-	1338	protein_coding	Allophagy receptor allo-1 [Source:UniProtKB/Swiss-Prot;Acc:Q9U389]	-
WBGene00044016	14.2038	61.2726	61.2142	8.36808	7.37276	4.56119	45.5635	6.76734	2.74412	0.00097907	0.0128781	C35A5.10	V	10504193	10505401	+	1016	protein_coding	-	-
WBGene00022848	953.55	1571.07	1453.37	836.808	604.566	509.713	1326	650.362	1.02719	0.000980398	0.0128854	ZK1055.7	V	6602728	6605375	-	1763	protein_coding	-	-
WBGene00020736	1055.82	938.236	801.349	157.134	255.94	615.761	931.801	342.945	1.4434	0.000986296	0.0129528	T23F2.3	X	5511997	5512327	-	285	protein_coding	UPF0057 membrane protein T23F2.3 [Source:UniProtKB/Swiss-Prot;Acc:Q22700]	-
WBGene00014013	4121	3175.64	3940.9	2491.83	2057	1713.87	3745.85	2087.56	0.843286	0.000994635	0.013052	ZK632.4	III	9805515	9807454	-	1448	protein_coding	Probable mannose-6-phosphate isomerase [Source:UniProtKB/Swiss-Prot;Acc:P34650]	-
WBGene00011019	1249.94	898.983	854.216	1549.02	1650.44	3967.1	1001.05	2388.85	-1.25463	0.00099765	0.0130813	R05A10.2	IV	14177200	14178940	+	691	protein_coding	-	-
WBGene00011404	323.847	340.829	436.847	183.168	161.147	205.254	367.174	183.19	1.00361	0.00100082	0.0131126	T03F7.7	V	11311456	11313445	+	1338	protein_coding	-	-
WBGene00016823	7.57537	32.5511	56.5767	4.64893	0	0	32.2344	1.54964	4.31501	0.00100424	0.0131441	C50E3.12	V	7620504	7622061	-	1333	protein_coding	-	-
WBGene00016869	47.3461	52.6561	63.0692	116.223	151.668	139.116	54.3571	135.669	-1.31866	0.00100479	0.0131441	C52B9.10	X	4273914	4274750	+	740	protein_coding	-	-
WBGene00023427	50.1868	30.6363	77.909	15.8064	8.42601	5.70149	52.9107	9.97796	2.39477	0.00100748	0.0131689	F14D2.15	II	3342335	3343814	-	1062	protein_coding	-	-
WBGene00017563	1973.38	1329.81	1143.59	900.033	707.785	624.883	1482.26	744.234	0.993566	0.00101308	0.013224	F18C5.10	II	6559258	6561583	-	1519	protein_coding	-	-
WBGene00010727	1288.76	1055.04	1138.95	1855.85	1876.89	2261.21	1160.92	1997.99	-0.783156	0.00101327	0.013224	K09G1.1	V	9583545	9590523	+	1496	protein_coding	-	-
WBGene00009796	1635.33	1477.24	1659.28	682.463	1057.46	882.59	1590.62	874.173	0.863913	0.00101925	0.0132916	F46G10.1	X	13310227	13311830	-	721	protein_coding	-	-
WBGene00003994	142.985	299.661	383.052	59.5063	84.2601	140.257	275.233	94.6743	1.54243	0.00102335	0.0133347	pgl-3	V	4755985	4758584	+	2276	protein_coding	Guanyl-specific ribonuclease pgl-3 [Source:UniProtKB/Swiss-Prot;Acc:G5EBV6]	-
WBGene00006463	254.722	316.894	441.484	136.679	146.402	181.307	337.7	154.796	1.12654	0.00103407	0.013461	nduf-2.2	III	6465157	6467208	+	1557	protein_coding	NADH Ubiquinone oxidoreductase Fe-S protein [Source:UniProtKB/TrEMBL;Acc:Q22800]	-
WBGene00019039	7.57537	12.446	18.5498	0	0	0	12.857	0	6.0743	0.00103514	0.013461	fbxb-18	II	1686834	1687795	-	914	protein_coding	F-box B protein [Source:UniProtKB/TrEMBL;Acc:Q9TZG4]	-
WBGene00001231	1703.51	1589.26	1734.4	3132.45	3576.84	2298.84	1675.72	3002.71	-0.841561	0.00103546	0.013461	eif-3.H	I	4444719	4446598	+	1451	protein_coding	Eukaryotic translation initiation factor 3 subunit H [Source:UniProtKB/Swiss-Prot;Acc:O01974]	-
WBGene00013584	318.166	349.445	352.445	124.591	173.786	197.272	340.019	165.216	1.04311	0.00103704	0.013471	nhr-243	V	18895317	18900532	-	1281	protein_coding	Nuclear Hormone Receptor family [Source:UniProtKB/TrEMBL;Acc:Q9U1R0]	Miscellaneous
WBGene00018286	1050.14	1557.66	1002.61	747.548	569.809	533.659	1203.47	617.005	0.963333	0.00103892	0.0134784	F41E6.5	V	8603480	8605469	+	1628	protein_coding	-	-
WBGene00007954	20.8323	28.7215	18.5498	68.8042	61.0886	101.487	22.7012	77.1264	-1.76375	0.00103985	0.0134784	gcp-2.2	X	11537714	11541417	+	2464	protein_coding	Glutamate CarboxyPeptidase 2 homolog [Source:UniProtKB/TrEMBL;Acc:Q93332]	-
WBGene00011185	490.505	221.156	323.693	142.257	107.432	175.606	345.118	141.765	1.28423	0.00104002	0.0134784	R10D12.1	V	13932575	13934645	-	1667	protein_coding	-	-
WBGene00009503	1598.4	1462.88	1203.88	858.193	743.595	833.558	1421.72	811.782	0.808385	0.00104267	0.0134963	F37A8.5	III	3956624	3958161	+	1100	protein_coding	Protein yippee-like F37A8.5 [Source:UniProtKB/Swiss-Prot;Acc:Q9U3G6]	-
WBGene00015281	21.7792	4.78692	3.70995	39.9808	37.917	120.872	10.092	66.2565	-2.71353	0.00104367	0.0134963	C01B10.7	IV	6638556	6639271	+	417	protein_coding	-	-
WBGene00021869	14.2038	14.3608	9.27488	0	0	0	12.6132	0	6.04628	0.00104383	0.0134963	vrp-1	IV	3012587	3014440	+	779	protein_coding	Vitellogenin Regulating Protein [Source:UniProtKB/TrEMBL;Acc:Q95XW9]	-
WBGene00004025	680.837	741.973	680.776	1002.31	1415.57	1351.25	701.195	1256.38	-0.841143	0.00104611	0.0135153	phy-2	IV	12211098	12215987	-	1735	protein_coding	Prolyl 4-hydroxylase subunit alpha-2 [Source:UniProtKB/Swiss-Prot;Acc:Q20065]	-
WBGene00019620	2699.67	3185.22	2916.02	4580.13	4656.42	5362.82	2933.64	4866.46	-0.730142	0.00105515	0.0136216	fah-1	X	6446649	6448999	-	1531	protein_coding	FumarylAcetoacetate Hydrolase [Source:UniProtKB/TrEMBL;Acc:Q94272]	-
WBGene00012565	110.79	134.991	192.917	43.7	55.8223	66.1373	146.233	55.2198	1.40788	0.00105939	0.0136658	fbxa-210	V	18125375	18127205	+	1328	protein_coding	F-box A protein [Source:UniProtKB/TrEMBL;Acc:E0R7K6]	-
WBGene00006374	62.4968	148.395	199.41	25.1042	42.13	52.4537	136.767	39.896	1.78152	0.00107124	0.013808	syx-4	IV	8457280	8458933	+	988	protein_coding	Putative syntaxin-4 [Source:UniProtKB/Swiss-Prot;Acc:P91409]	-
WBGene00003957	1942.14	2643.34	2733.31	1020.91	1114.34	158.501	2439.59	764.582	1.67353	0.00107409	0.0138341	pcp-2	IV	9160640	9165127	-	3504	protein_coding	Prolyl Carboxy Peptidase like [Source:UniProtKB/TrEMBL;Acc:G5EFJ8]	-
WBGene00004307	1297.28	1212.05	1145.45	2066.92	2105.45	1890.61	1218.26	2020.99	-0.730311	0.00108696	0.013989	rap-1	IV	8916408	8918890	-	1160	protein_coding	Ras-related protein Rap-1 [Source:UniProtKB/Swiss-Prot;Acc:Q18246]	-
WBGene00044757	166.658	173.286	127.066	79.0318	56.8756	52.4537	155.67	62.787	1.30688	0.00108946	0.0140006	Y55F3BR.11	IV	855673	856846	+	441	protein_coding	-	-
WBGene00008978	244.306	320.724	331.113	751.267	641.43	436.734	298.714	609.81	-1.03016	0.00108953	0.0140006	cutl-3	X	14994752	14999198	-	1623	protein_coding	CUTiclin-Like [Source:UniProtKB/TrEMBL;Acc:Q93532]	-
WBGene00000738	285.023	611.768	734.57	277.076	48.4495	159.642	543.787	161.723	1.74827	0.00109289	0.014033	col-165	X	4353618	4354820	+	1060	protein_coding	COLlagen [Source:UniProtKB/TrEMBL;Acc:Q966K5]	-
WBGene00008354	176.127	102.44	156.745	196.185	440.259	469.803	145.104	368.749	-1.34454	0.00110018	0.0141157	gcsh-1	X	14514136	14515073	-	505	protein_coding	Glycine cleavage system H protein [Source:UniProtKB/TrEMBL;Acc:O62122]	-
WBGene00000990	246.2	296.789	434.064	582.976	703.572	677.337	325.684	654.628	-1.00687	0.00110166	0.0141239	dhs-27	X	3412876	3414708	-	1065	protein_coding	Uncharacterized oxidoreductase dhs-27 [Source:UniProtKB/Swiss-Prot;Acc:Q11177]	-
WBGene00015532	89.0106	86.1646	121.501	27.8936	20.0118	45.6119	98.892	31.1724	1.66981	0.00110724	0.0141761	C06E4.3	IV	7260875	7262132	+	989	protein_coding	-	-
WBGene00010905	499.975	505.499	530.523	754.987	960.565	1028.55	511.999	914.7	-0.83678	0.00110747	0.0141761	mrps-34	III	4541326	4542452	-	906	protein_coding	Mitochondrial Ribosomal Protein, Small [Source:UniProtKB/TrEMBL;Acc:Q21601]	-
WBGene00019495	3995.06	7387.17	7163.91	14599.5	18270.7	8183.92	6182.05	13684.7	-1.14643	0.00110828	0.0141761	sdz-24	II	658669	659867	+	949	protein_coding	SKN-1 Dependent Zygotic transcript [Source:UniProtKB/TrEMBL;Acc:O16689]	-
WBGene00012306	1310.54	1746.27	1656.49	958.61	873.145	882.59	1571.1	904.782	0.796016	0.00110921	0.0141773	W06F12.2	III	13726641	13731679	-	2155	protein_coding	-	-
WBGene00011560	391.079	538.05	733.643	126.451	195.905	338.668	554.257	220.341	1.33264	0.00111246	0.0142078	T07C4.3	III	10352157	10355117	+	2379	protein_coding	-	-
WBGene00018932	476.302	495.925	517.538	742.899	894.21	1046.79	496.588	894.634	-0.848836	0.00111731	0.014259	mrpl-2	IV	773228	776655	+	1087	protein_coding	Mitochondrial Ribosomal Protein, Large [Source:UniProtKB/TrEMBL;Acc:U4PFC3]	-
WBGene00004075	3556.64	5131.58	4915.68	2976.25	2229.73	1390.02	4534.63	2198.67	1.04413	0.0011259	0.0143576	pod-1	III	13514945	13524110	-	4028	protein_coding	POD-1 [Source:UniProtKB/TrEMBL;Acc:G5EDS2]	-
WBGene00010470	1425.12	1209.18	1338.36	866.561	719.37	717.247	1324.22	767.726	0.786167	0.00112792	0.0143723	cdr-4	V	12407428	12408592	-	869	protein_coding	CaDmium Responsive; Cadmium-inducible lysosomal protein CDR-4 [Source:UniProtKB/TrEMBL;Acc:G5EDZ7]	-
WBGene00000547	1821.88	2257.51	1982.97	1276.6	1185.96	775.402	2020.79	1079.32	0.904411	0.00113434	0.0144432	clp-7	IV	1435465	1446182	-	2715	protein_coding	CaLPain family [Source:UniProtKB/TrEMBL;Acc:U4PMH7]	-
WBGene00006808	1409.02	1137.37	1067.54	1894.9	2255.01	2100.43	1204.64	2083.45	-0.790318	0.00114167	0.0145254	unc-76	V	15071748	15080152	+	2644	protein_coding	-	-
WBGene00044644	81.4353	96.6958	120.573	28.8234	28.4378	44.4716	99.5681	33.9109	1.55775	0.00114492	0.0145557	B0205.13	I	10727755	10728808	-	453	protein_coding	-	-
WBGene00005283	6.62845	8.61646	24.1147	0	0	0	13.1199	0	6.10374	0.00114893	0.0145956	srh-61	II	12514972	12516413	-	1021	protein_coding	Serpentine Receptor, class H [Source:UniProtKB/TrEMBL;Acc:O18103]	-
WBGene00021093	1264.14	1368.1	1585.08	2056.69	2726.87	2549.71	1405.77	2444.42	-0.798001	0.00115281	0.0146337	W08F4.3	II	580602	582014	+	884	protein_coding	-	-
WBGene00018137	319.113	565.814	677.066	244.534	244.354	84.382	520.664	191.09	1.44468	0.00115379	0.0146351	bath-41	III	6720415	6722258	-	1492	protein_coding	BTB and MATH domain-containing protein 41 [Source:UniProtKB/Swiss-Prot;Acc:P41886]	-
WBGene00011988	95.6391	139.778	252.277	50.2085	71.6211	39.9104	162.565	53.9133	1.59183	0.00115826	0.0146738	har-2	I	9956150	9958357	-	1356	protein_coding	-	-
WBGene00016485	53.0276	134.991	177.15	48.3489	14.7455	29.6477	121.723	30.9141	1.97328	0.0011586	0.0146738	meg-4	X	1682954	1686419	+	2712	protein_coding	-	-
WBGene00016947	68.1784	71.8038	94.6037	32.5425	16.852	19.3851	78.1953	22.9265	1.76422	0.00116058	0.0146878	C55B7.11	I	6511612	6513843	-	1404	protein_coding	-	-
WBGene00001226	3550.96	3778.79	4506.66	7744.19	8021.56	5402.73	3945.47	7056.16	-0.838724	0.00116174	0.0146913	eif-3.C	I	9976393	9979662	-	3044	protein_coding	Eukaryotic translation initiation factor 3 subunit C [Source:UniProtKB/Swiss-Prot;Acc:O02328]	-
WBGene00021977	640.119	1213.96	1025.8	566.24	250.674	434.453	959.961	417.122	1.20203	0.00116678	0.0147347	Y58A7A.3	V	5077849	5080903	-	2806	protein_coding	-	-
WBGene00003922	1355.99	1561.49	1936.59	2695.45	2775.32	2935.13	1618.03	2801.96	-0.792139	0.00116693	0.0147347	pas-1	V	14421566	14422618	-	946	protein_coding	Proteasome subunit alpha type-6 [Source:UniProtKB/Swiss-Prot;Acc:O17586]	-
WBGene00018146	570.047	545.709	484.149	900.033	1138.56	835.838	533.301	958.145	-0.845368	0.00117447	0.0148006	F37C4.6	IV	3875410	3878372	-	1754	protein_coding	-	-
WBGene00021939	230.102	345.616	305.143	85.5404	128.497	11.403	293.62	75.1467	1.96401	0.00117457	0.0148006	Y55F3BR.2	IV	857327	874724	+	4893	protein_coding	-	-
WBGene00008335	345.626	358.062	422.934	197.115	211.703	116.31	375.541	175.043	1.09986	0.0011748	0.0148006	C55A6.6	V	11513665	11514737	-	928	protein_coding	-	-
WBGene00011730	2770.69	2629.93	2714.76	3853.03	4777.55	4849.69	2705.13	4493.42	-0.732045	0.00117778	0.0148269	drr-2	III	13642420	13643570	-	1001	protein_coding	Dietary Restriction Response (WT but not eat-2 lifespan increased) [Source:UniProtKB/TrEMBL;Acc:O45781]	-
WBGene00000653	87.1168	109.142	142.833	24.1744	31.5975	0	113.031	18.5907	2.59759	0.00119171	0.014991	col-77	II	8358228	8359381	-	1024	protein_coding	COLlagen [Source:UniProtKB/TrEMBL;Acc:Q21562]	-
WBGene00007136	126.888	132.119	147.471	49.2787	66.3548	23.9463	135.492	46.5266	1.53916	0.00119279	0.0149933	B0285.3	III	4341983	4343336	-	740	protein_coding	-	-
WBGene00001781	149.614	116.801	112.226	65.0851	17.9053	28.5074	126.213	37.1659	1.7572	0.00119393	0.0149963	gst-33	V	3467453	3468545	-	778	protein_coding	Glutathione S-Transferase [Source:UniProtKB/TrEMBL;Acc:O16198]	-
WBGene00013540	474.408	410.718	337.606	192.466	215.916	222.358	407.577	210.247	0.955477	0.00119764	0.015031	Y75B8A.3	III	12101810	12106597	-	2716	protein_coding	-	-
WBGene00018395	5536.65	4775.43	4946.29	7809.28	8199.56	8726.7	5086.12	8245.18	-0.696963	0.00119849	0.015031	mtch-1	II	7372594	7374172	-	1343	protein_coding	MiTochondrial Carrier Homolog [Source:UniProtKB/TrEMBL;Acc:Q8I7N5]	-
WBGene00000689	44.5053	102.44	165.093	35.3319	15.7988	28.5074	104.013	26.546	1.96815	0.00120747	0.0151322	col-115	IV	7988685	7991425	+	1297	protein_coding	COLlagen [Source:UniProtKB/TrEMBL;Acc:Q9N3X9]	-
WBGene00020706	1914.68	2089.97	1909.7	1085.06	888.944	238.322	1971.45	737.442	1.4181	0.00121248	0.0151836	atg-9	V	349374	359016	+	2958	protein_coding	Autophagy-related protein 9 [Source:UniProtKB/TrEMBL;Acc:H2L0M4]	-
WBGene00020600	620.234	616.555	671.501	1238.48	1531.43	865.486	636.097	1211.8	-0.929996	0.00121719	0.0152313	trd-1	III	7386229	7391135	+	2509	protein_coding	Tetratricopeptide repeat-containing protein trd-1 [Source:UniProtKB/Swiss-Prot;Acc:P41842]	-
WBGene00045392	95.6391	101.483	91.8213	40.9106	34.7573	18.2448	96.3144	31.3042	1.61544	0.00122083	0.0152547	F26D11.12	V	7954793	7955363	-	460	protein_coding	-	-
WBGene00001433	257.563	215.411	229.089	397.949	440.259	466.382	234.021	434.863	-0.893564	0.00122088	0.0152547	fkb-8	I	12916441	12918108	+	1080	protein_coding	Peptidylprolyl isomerase [Source:UniProtKB/TrEMBL;Acc:Q8I4E5]	-
WBGene00012138	9.46922	15.3181	12.0573	0	0	0	12.2816	0	6.00794	0.00122289	0.0152683	T28F4.3	I	7484159	7486302	-	1572	protein_coding	Protein-tyrosine-phosphatase [Source:UniProtKB/TrEMBL;Acc:Q22852]	-
WBGene00019436	794.467	422.206	366.358	195.255	180.106	295.337	527.677	223.566	1.23979	0.00123419	0.0153979	K06A9.2	X	1536366	1540287	+	1914	protein_coding	-	-
WBGene00020584	17.9915	3.82954	17.6223	0	0	0	13.1478	0	6.10666	0.00123653	0.0154156	T19D12.10	II	6655096	6658866	-	1516	protein_coding	-	-
WBGene00001941	5.68153	25.8494	19.4772	0.929786	0	0	17.0027	0.309929	5.51543	0.00123775	0.0154193	his-67	I	9988341	9988826	-	486	protein_coding	Histone H4 [Source:UniProtKB/Swiss-Prot;Acc:P62784]	-
WBGene00004105	451.682	247.005	192.917	611.799	721.477	648.829	297.201	660.702	-1.15259	0.0012394	0.0154284	szy-20	II	8966921	8969366	-	2041	protein_coding	Suppressor of zyg-1 protein 20 [Source:UniProtKB/Swiss-Prot;Acc:G5EGU9]	-
WBGene00018702	468.726	561.984	734.57	367.266	183.266	259.988	588.427	270.173	1.12206	0.00124343	0.0154671	F52E4.5	X	3085829	3087345	-	1157	protein_coding	-	-
WBGene00006515	1074.76	1170.88	1156.58	1690.35	1833.71	2721.89	1134.07	2081.98	-0.87623	0.00125345	0.0155801	txdc-9	III	6432178	6433145	+	797	protein_coding	Thioredoxin domain-containing protein 9 [Source:UniProtKB/Swiss-Prot;Acc:Q11183]	-
WBGene00013690	540.692	436.567	421.079	776.372	1051.14	764	466.113	863.839	-0.89008	0.00125543	0.0155931	hprt-1	I	14657355	14661414	+	852	protein_coding	Hypoxanthine phosphoribosyltransferase [Source:UniProtKB/TrEMBL;Acc:Q9NF11]	-
WBGene00001431	5284.77	5461.88	5394.27	7670.74	8822.03	10584.2	5380.3	9025.67	-0.746301	0.00125741	0.0156047	fkb-6	V	20846113	20847727	+	1523	protein_coding	Peptidylprolyl isomerase [Source:UniProtKB/TrEMBL;Acc:O45418]	-
WBGene00021667	21.7792	26.8067	17.6223	0.929786	3.15975	0	22.0694	1.36318	4.00706	0.00125823	0.0156047	snpc-3.2	I	252118	254277	+	1427	protein_coding	SNAPc (Small Nuclear RNA Activating Complex) homolog [Source:UniProtKB/TrEMBL;Acc:Q965U6]	-
WBGene00016250	19044.5	8883.57	7282.63	30429.1	34113.7	18285.8	11736.9	27609.6	-1.23413	0.00126132	0.0156255	hsp-110	III	8443917	8446920	-	2706	protein_coding	Heat shock protein 110 [Source:UniProtKB/Swiss-Prot;Acc:Q05036]	-
WBGene00015457	8.5223	13.4034	14.8398	0	0	0	12.2552	0	6.00499	0.00126191	0.0156255	C04G6.7	II	5100412	5101801	-	612	protein_coding	-	-
WBGene00003397	602.242	566.771	741.99	312.408	275.952	409.367	637.001	332.576	0.938311	0.00126272	0.0156255	mom-5	I	9965580	9970037	+	2477	protein_coding	-	-
WBGene00012978	1684.57	1776.9	1859.61	2824.69	3838.05	2642.07	1773.7	3101.6	-0.806255	0.00126473	0.0156303	Y48B6A.1	II	14151040	14154373	-	2340	protein_coding	Ribosome biogenesis protein BOP1 homolog [Source:UniProtKB/Swiss-Prot;Acc:Q9U2A9]	-
WBGene00016892	217.792	215.411	457.251	142.257	123.23	71.8388	296.818	112.442	1.39858	0.00126497	0.0156303	pgph-3	V	5762494	5763846	-	1252	protein_coding	PhosphoGlycolate Phosphatase Homolog [Source:UniProtKB/TrEMBL;Acc:O44538]	-
WBGene00007207	521.754	506.456	480.439	764.284	982.683	891.713	502.883	879.56	-0.806367	0.00126888	0.0156671	B0564.7	IV	13100715	13104641	+	1940	protein_coding	-	-
WBGene00007145	322.9	305.405	253.204	439.789	570.862	742.334	293.837	584.328	-0.991179	0.00127553	0.0157293	B0334.5	II	11497665	11499620	+	1411	protein_coding	-	-
WBGene00020717	530.276	457.63	522.176	733.601	954.245	1050.21	503.36	912.687	-0.85811	0.00127581	0.0157293	mrpl-4	V	8467265	8468943	+	1011	protein_coding	Mitochondrial Ribosomal Protein, Large [Source:UniProtKB/TrEMBL;Acc:O17005]	-
WBGene00002072	463.045	590.706	700.253	370.055	262.26	228.06	584.668	286.791	1.02645	0.00128284	0.0158043	ima-1	V	11239675	11241780	+	1917	protein_coding	Importin subunit alpha-1 [Source:UniProtKB/Swiss-Prot;Acc:Q22560]	-
WBGene00003614	177.074	108.184	106.661	246.393	278.058	350.071	130.64	291.508	-1.15735	0.001287	0.0158439	nhr-15	V	320204	323647	+	1741	protein_coding	Nuclear Hormone Receptor family [Source:UniProtKB/TrEMBL;Acc:O61854]	THR-like
WBGene00015278	496.187	449.97	508.263	757.776	783.619	1448.18	484.807	996.524	-1.03903	0.00129127	0.0158848	C01B10.3	IV	6619468	6621352	-	1302	protein_coding	-	-
WBGene00015505	62.4968	94.781	140.978	15.8064	28.4378	41.0507	99.4187	28.4316	1.81278	0.00129938	0.0159728	C06A5.8	I	6008105	6009606	-	1070	protein_coding	-	-
WBGene00003148	3237.53	3294.36	3202.62	4765.16	5196.74	5993.41	3244.83	5318.43	-0.712798	0.001304	0.0160178	mbf-1	IV	11479358	11480369	-	965	protein_coding	MBF (Multiprotein bridging factor) transcriptional coactivator [Source:UniProtKB/TrEMBL;Acc:Q9XTV4]	-
WBGene00000767	650.535	611.768	714.166	1098.08	1159.63	1077.58	658.823	1111.76	-0.754856	0.00130533	0.0160224	coq-8	III	4863427	4866949	+	2366	protein_coding	Atypical kinase coq-8, mitochondrial [Source:UniProtKB/Swiss-Prot;Acc:Q18486]	-
WBGene00007746	440.319	422.206	397.892	726.163	715.157	725.229	420.139	722.183	-0.781532	0.00130681	0.0160288	C26D10.6	II	8350535	8354700	-	1749	protein_coding	-	-
WBGene00017726	209.27	326.468	294.941	67.8744	91.6328	167.624	276.893	109.044	1.34759	0.0013099	0.0160549	F22H10.2	X	16678488	16679823	+	335	protein_coding	-	-
WBGene00018746	18.9384	28.7215	32.4621	4.64893	0	0	26.7073	1.54964	4.03908	0.00131662	0.0161212	fbxb-103	II	3907140	3908478	+	1201	protein_coding	F-box B protein [Source:UniProtKB/TrEMBL;Acc:Q9TXT8]	-
WBGene00009628	2919.36	1933.92	1687.1	3570.38	4872.34	3986.48	2180.13	4143.07	-0.926274	0.00131812	0.0161212	tatn-1	X	14791008	14792980	+	1783	protein_coding	Tyrosine AminoTraNsferase [Source:UniProtKB/TrEMBL;Acc:Q93703]	-
WBGene00021046	219.686	194.349	276.391	103.206	84.2601	125.433	230.142	104.3	1.14284	0.0013182	0.0161212	sedl-1	X	1439261	1440261	-	540	protein_coding	Probable trafficking protein particle complex subunit 2 [Source:UniProtKB/Swiss-Prot;Acc:O02173]	-
WBGene00012035	338.051	433.695	368.213	721.514	612.992	713.826	379.986	682.778	-0.845565	0.00132153	0.0161394	T26C5.5	II	9245905	9246811	-	574	protein_coding	-	-
WBGene00007504	215.898	229.772	235.582	374.704	434.993	449.277	227.084	419.658	-0.885553	0.00132162	0.0161394	nbs-1	II	11095048	11096475	-	1193	protein_coding	Nijmegen Breakage Syndrome homolog [Source:UniProtKB/TrEMBL;Acc:A0A2K5ATP9]	-
WBGene00010790	29151	19046.2	16586.3	10375.5	10609.4	13409.9	21594.5	11464.9	0.913452	0.00132552	0.0161697	sodh-1	V	11888236	11889634	+	1307	protein_coding	Alcohol dehydrogenase 1 [Source:UniProtKB/Swiss-Prot;Acc:Q17334]	-
WBGene00002238	5159.78	4454.71	5107.67	8069.62	9043.21	7203.26	4907.39	8105.36	-0.723933	0.00132603	0.0161697	kars-1	II	7070183	7072415	-	2137	protein_coding	Lysine--tRNA ligase [Source:UniProtKB/Swiss-Prot;Acc:Q22099]	-
WBGene00010113	227.261	164.67	95.5312	374.704	331.774	415.068	162.487	373.849	-1.20224	0.00132726	0.0161728	F55D12.5	I	7906826	7914269	-	2328	protein_coding	-	-
WBGene00010053	120.259	213.497	316.273	70.6638	94.7926	80.9611	216.676	82.1392	1.40022	0.00133435	0.0162474	F54D5.9	II	11542636	11544875	-	1977	protein_coding	-	-
WBGene00010681	17298.4	20740.8	17310.6	11673.5	11924.9	8538.55	18449.9	10712.3	0.784313	0.00133857	0.0162869	mak-1	II	8743725	8747234	+	2698	protein_coding	MAP kinase-activated protein kinase mak-1 [Source:UniProtKB/Swiss-Prot;Acc:Q21360]	-
WBGene00019311	590.879	690.274	875.548	1411.42	1533.53	1071.88	718.9	1338.94	-0.89733	0.00134471	0.0163497	K02E7.6	II	1057212	1059280	+	1726	pseudogene	-	-
WBGene00012073	340.892	348.488	368.213	622.027	597.193	620.322	352.531	613.181	-0.798548	0.00134772	0.0163745	cpd-2	X	16049844	16054623	+	1620	protein_coding	CarboxyPeptidase D family [Source:UniProtKB/TrEMBL;Acc:Q22825]	-
WBGene00011897	1336.11	1215.88	1225.21	1896.76	2337.16	2057.1	1259.07	2097.01	-0.73592	0.00135153	0.0164088	scpl-4	V	10599105	10602147	+	1739	protein_coding	Mitochondrial import inner membrane translocase subunit TIM50 [Source:UniProtKB/Swiss-Prot;Acc:Q22647]	-
WBGene00001872	63.4438	48.8266	91.8213	13.017	20.0118	22.806	68.0305	18.6116	1.87581	0.00135366	0.0164227	him-14	II	7065020	7069966	-	2627	protein_coding	MutS protein homolog him-14 [Source:UniProtKB/Swiss-Prot;Acc:Q23405]	-
WBGene00001755	3547.17	4104.3	5460.12	1867.01	1623.06	3046.88	4370.53	2178.98	1.00432	0.00135472	0.0164236	gst-7	II	4882062	4883358	+	745	protein_coding	Probable glutathione S-transferase 7 [Source:UniProtKB/Swiss-Prot;Acc:P91253]	-
WBGene00014207	956.391	513.158	515.683	974.416	1578.82	1761.76	661.744	1438.33	-1.11984	0.00136575	0.0165411	ZK1058.9	III	3923792	3926238	-	1379	protein_coding	-	-
WBGene00000961	1020.78	1038.76	922.85	2357.94	2035.93	1281.69	994.131	1891.86	-0.928555	0.00136639	0.0165411	dgn-1	X	10920533	10928998	-	2567	protein_coding	DystroGlycaN [Source:UniProtKB/TrEMBL;Acc:Q22629]	-
WBGene00022252	340.892	231.687	214.25	124.591	127.443	114.03	262.276	122.022	1.10353	0.00137291	0.016608	Y73B6BL.31	IV	6442229	6446532	+	1567	protein_coding	-	-
WBGene00206522	303.015	539.007	645.531	1194.78	867.879	1042.23	495.851	1034.96	-1.06165	0.00137471	0.0166089	F14D2.19	II	3335422	3337139	-	1303	protein_coding	-	-
WBGene00010396	98.4799	90.9515	153.035	239.885	250.674	258.848	114.156	249.802	-1.12921	0.00137497	0.0166089	H13N06.2	X	15488106	15491987	+	1604	protein_coding	-	-
WBGene00016486	37.8769	63.1873	86.2564	17.6659	4.213	17.1045	62.4402	12.9945	2.26302	0.00137873	0.0166423	fbxa-170	X	1676205	1678121	-	1539	protein_coding	F-box A protein [Source:UniProtKB/TrEMBL;Acc:Q9TZK9]	-
WBGene00235308	6.62845	14.3608	15.7673	0	0	0	12.2522	0	6.00465	0.00138089	0.0166563	C37C3.17	V	7860786	7861688	-	489	protein_coding	-	-
WBGene00012592	862.646	1988.49	1797.47	972.557	483.442	509.713	1549.53	655.237	1.24121	0.00138777	0.0167273	Y38E10A.14	II	12623215	12624506	-	1147	protein_coding	-	-
WBGene00000996	1991.38	2689.29	3395.53	1694.07	1378.71	1208.72	2692.07	1427.16	0.915371	0.0013917	0.0167626	dif-1	IV	7551550	7553008	-	1168	protein_coding	-	-
WBGene00013982	90.9045	167.542	172.513	295.672	262.26	459.54	143.653	339.157	-1.23868	0.00139357	0.0167646	ZK512.1	III	9115082	9117270	+	863	protein_coding	-	-
WBGene00021853	46.3992	94.781	92.7488	26.034	12.639	25.0866	77.9763	21.2532	1.8743	0.00139387	0.0167646	Y54F10AM.11	III	2562982	2563983	-	954	protein_coding	-	-
WBGene00000879	7099.07	6919.97	7308.6	9905.94	11652.1	18657.6	7109.22	13405.2	-0.91499	0.00140789	0.016921	cyn-3	V	15189927	15190926	+	640	protein_coding	Peptidyl-prolyl cis-trans isomerase 3 [Source:UniProtKB/Swiss-Prot;Acc:P52011]	-
WBGene00016501	303.015	551.453	659.444	307.759	154.828	143.678	504.637	202.088	1.31859	0.00141027	0.0169374	C37C3.9	V	7852286	7853975	-	1400	protein_coding	-	-
WBGene00016011	1843.66	1707.97	1852.19	2574.58	2993.34	3745.88	1801.27	3104.6	-0.785244	0.00141744	0.0170113	C23G10.2	III	6208064	6209140	+	727	protein_coding	RutC family protein C23G10.2 [Source:UniProtKB/Swiss-Prot;Acc:Q10121]	-
WBGene00000146	2161.82	2653.87	2437.44	1635.49	1288.13	1347.83	2417.71	1423.82	0.763685	0.00142814	0.0171275	ape-1	V	11675942	11685268	+	2744	protein_coding	Apoptotic enhancer 1 protein [Source:UniProtKB/Swiss-Prot;Acc:Q9XVN3]	-
WBGene00013103	842.76	1233.11	1030.44	3151.98	2708.96	1148.28	1035.44	2336.41	-1.17425	0.00143498	0.0171971	Y51H4A.7	IV	16535730	16542894	-	2294	protein_coding	Probable urocanate hydratase [Source:UniProtKB/Swiss-Prot;Acc:Q9NAE2]	-
WBGene00007001	463.992	476.777	423.862	658.289	943.713	864.346	454.877	822.116	-0.853571	0.00143648	0.0172028	tufm-2	I	4247754	4249415	+	1482	protein_coding	Mitochondrial elongation factor Tu homologue; TU elongation Factor (EF-Tu), Mitochondrial [Source:UniProtKB/TrEMBL;Acc:G5EDF5]	-
WBGene00003828	1418.49	1311.62	1126.9	2433.25	2945.94	1741.23	1285.67	2373.48	-0.884598	0.00144853	0.0173347	nuc-1	X	9539905	9542430	+	1350	protein_coding	Deoxyribonuclease-2 [Source:UniProtKB/Swiss-Prot;Acc:Q17778]	-
WBGene00003411	3093.59	3610.29	3323.19	2260.31	1619.9	883.731	3342.36	1587.98	1.07334	0.00146098	0.0174712	mrp-5	X	14938502	14946317	-	4724	protein_coding	-	-
WBGene00002368	143.932	174.244	255.987	51.1383	64.2483	104.907	191.388	73.4313	1.38565	0.00146672	0.0175272	let-99	IV	12567842	12570622	+	2286	protein_coding	-	-
WBGene00022108	59.6561	68.9316	69.5616	14.8766	13.6923	27.3671	66.0498	18.6453	1.83128	0.00147209	0.0175598	Y71F9AL.2	I	2915176	2918806	+	1536	protein_coding	-	-
WBGene00012795	27.4607	32.5511	48.2294	7.43829	5.26626	0	36.0804	4.23485	3.06536	0.00147228	0.0175598	Y43E12A.3	IV	10987906	10989182	+	1088	protein_coding	-	-
WBGene00021047	1323.8	1277.15	1307.76	770.793	865.772	655.671	1302.9	764.079	0.769739	0.0014726	0.0175598	zfp-3	X	1440366	1446643	-	4387	protein_coding	Zinc Finger Protein [Source:UniProtKB/TrEMBL;Acc:H2KZI3]	-
WBGene00011412	606.03	550.496	525.886	778.231	1024.81	1523.44	560.804	1108.83	-0.983041	0.00147433	0.0175679	mrpl-16	III	4704404	4705404	+	823	protein_coding	Mitochondrial Ribosomal Protein, Large [Source:UniProtKB/TrEMBL;Acc:Q22140]	-
WBGene00006306	1216.79	854.944	639.967	1569.48	1842.14	1800.53	903.902	1737.38	-0.942654	0.00147586	0.0175736	sue-1	I	7360199	7371534	-	2147	protein_coding	SUppressor of Elongation defect [Source:UniProtKB/TrEMBL;Acc:Q19136]	-
WBGene00017855	1012.26	1110.57	1139.88	1630.85	2150.74	1764.04	1087.57	1848.54	-0.765207	0.00148069	0.0175979	F27C1.6	I	5421313	5428457	-	2156	protein_coding	-	-
WBGene00020544	8.5223	38.2954	30.6071	3.71915	0	0	25.8082	1.23972	4.3078	0.00148097	0.0175979	fbxb-84	III	145360	146491	-	1085	protein_coding	F-box B protein [Source:UniProtKB/TrEMBL;Acc:O76694]	-
WBGene00015136	35.983	51.6987	116.863	12.0872	4.213	22.806	68.1817	13.0354	2.3934	0.00148106	0.0175979	B0304.4	II	4522465	4523222	-	622	protein_coding	-	-
WBGene00009050	20725.3	18859.5	19821.3	13039.3	11666.9	12752	19802	12486	0.665328	0.00148549	0.017638	F22D6.2	I	7079868	7081520	-	1138	protein_coding	-	-
WBGene00011190	214.004	320.724	326.476	126.451	87.4198	164.203	287.068	126.025	1.18866	0.00148825	0.0176583	swt-6	V	13954277	13956176	+	833	protein_coding	Sugar transporter SWEET [Source:UniProtKB/TrEMBL;Acc:P92011]	-
WBGene00013538	550.161	769.737	967.37	456.525	374.957	309.021	762.423	380.168	1.00328	0.00149205	0.0176908	ari-1.4	IV	15524094	15528670	-	1829	protein_coding	RBR-type E3 ubiquitin transferase [Source:UniProtKB/TrEMBL;Acc:D3NQB5]	-
WBGene00021463	35.983	44.997	44.5194	10.2277	0	0	41.8332	3.40922	3.57379	0.00151232	0.0179184	zeel-1	I	2342216	2350468	+	2921	protein_coding	-	-
WBGene00012830	279.342	280.513	345.953	431.421	579.288	895.134	301.936	635.281	-1.07239	0.00151369	0.017922	mrps-28	V	19644239	19645758	+	724	protein_coding	Mitochondrial Ribosomal Protein, Small [Source:UniProtKB/TrEMBL;Acc:Q9XWP0]	-
WBGene00004494	58626.8	45937.2	42902.8	65775	85778.9	160498	49155.6	104017	-1.08139	0.00151496	0.0179234	rps-25	IV	5947036	5947607	-	459	protein_coding	40S ribosomal protein S25 [Source:UniProtKB/Swiss-Prot;Acc:P52821]	-
WBGene00077691	35.983	65.1021	67.7066	13.9468	10.5325	0	56.2639	8.15977	2.76892	0.00151595	0.0179234	T06E4.14	V	9625422	9626269	+	772	protein_coding	-	-
WBGene00016749	1308.65	1169.92	1480.27	2088.3	2051.73	2701.37	1319.61	2280.47	-0.78906	0.00153042	0.0180817	C48E7.1	I	6260249	6264540	+	810	protein_coding	-	-
WBGene00008856	1782.11	2305.38	2086.85	1284.04	1233.36	1173.37	2058.11	1230.25	0.742268	0.00153981	0.0181797	F15D3.6	I	11572121	11577488	-	958	protein_coding	-	-
WBGene00044286	4.73461	6.70169	27.8246	0	0	0	13.087	0	6.10023	0.00154316	0.0182064	ugt-35	V	10651995	10654265	-	1611	protein_coding	UDP-GlucuronosylTransferase [Source:UniProtKB/TrEMBL;Acc:Q52GY8]	-
WBGene00017483	77.6476	134.034	189.207	64.1553	32.6508	30.788	133.63	42.5314	1.64698	0.00155442	0.0183152	lgc-22	IV	4301308	4304437	+	1456	protein_coding	Ligand-Gated ion Channel [Source:UniProtKB/TrEMBL;Acc:I2HA93]	-
WBGene00016454	600.348	297.746	244.857	705.708	735.169	1311.34	380.984	917.407	-1.26758	0.00155541	0.0183152	C35E7.2	I	10841114	10844647	+	2641	protein_coding	-	-
WBGene00009723	3226.16	2205.81	2030.27	3786.09	4438.4	5856.57	2487.42	4693.69	-0.916005	0.00155566	0.0183152	F45D3.3	V	12549216	12550385	-	1053	protein_coding	-	-
WBGene00019975	407.176	535.178	419.224	763.355	741.489	970.393	453.859	825.079	-0.862083	0.00155788	0.0183284	flp-34	V	1027904	1033385	-	684	protein_coding	FMRF-Like Peptide [Source:UniProtKB/TrEMBL;Acc:A0A0K3AST3]	-
WBGene00011600	56.8153	129.247	179.933	41.8404	29.491	42.191	121.998	37.8408	1.68882	0.00156232	0.0183677	zim-2	IV	10555247	10558221	+	2354	protein_coding	Zinc finger In Meiosis [Source:UniProtKB/TrEMBL;Acc:O18067]	-
WBGene00015461	603.189	588.791	599.157	862.842	1129.09	1101.53	597.046	1031.15	-0.788065	0.00156475	0.0183833	krr-1	V	7231190	7232749	+	1253	protein_coding	KRR1 small subunit processome component [Source:UniProtKB/TrEMBL;Acc:O16311]	-
WBGene00018960	495.24	433.695	578.752	1074.83	1160.68	679.617	502.562	971.711	-0.95146	0.0015723	0.0184591	ilcr-2	II	5475409	5478524	+	2470	protein_coding	Interleukin cytokine receptor-related protein 2 [Source:UniProtKB/Swiss-Prot;Acc:Q10128]	-
WBGene00022540	149.614	86.1646	118.718	11.1574	14.7455	60.4358	118.166	28.7796	2.04685	0.00157506	0.0184731	ZC190.6	V	8674600	8677293	-	1875	protein_coding	-	-
WBGene00011742	446	491.138	487.859	778.231	752.021	952.149	474.999	827.467	-0.800515	0.00157658	0.0184731	tgn-38	IV	12026882	12029174	-	1278	protein_coding	Trans-Golgi Network protein homolog [Source:UniProtKB/TrEMBL;Acc:G5EFW0]	-
WBGene00015025	731.97	698.89	701.181	1122.25	1092.22	1525.72	710.68	1246.73	-0.810618	0.00157681	0.0184731	mrpl-9	I	10732543	10733686	-	954	protein_coding	Mitochondrial Ribosomal Protein, Large [Source:UniProtKB/TrEMBL;Acc:Q95X39]	-
WBGene00044789	566.259	436.567	550.928	675.955	1118.55	1310.2	517.918	1034.9	-0.998235	0.00158372	0.0185411	T07A9.14	IV	386699	387949	+	958	protein_coding	-	-
WBGene00013845	231.049	466.246	347.808	202.693	128.497	114.03	348.368	148.407	1.22911	0.00159703	0.0186838	fbxa-37	III	1285016	1287119	+	977	protein_coding	F-box A protein [Source:UniProtKB/TrEMBL;Acc:A4F333]	-
WBGene00015104	777.423	823.35	852.361	1347.26	1520.89	1237.22	817.711	1368.46	-0.742935	0.00159876	0.0186871	B0280.9	III	7120905	7122895	-	1399	protein_coding	U3 small nucleolar RNA-associated protein 18 homolog [Source:UniProtKB/Swiss-Prot;Acc:P42000]	-
WBGene00219683	46.3992	51.6987	57.5042	14.8766	7.37276	0	51.8674	7.41645	2.78444	0.00159955	0.0186871	anr-32	V	6003575	6006746	-	1542	antisense_RNA	-	-
WBGene00011712	7.57537	10.5312	17.6223	0	0	0	11.9096	0	5.96391	0.0016023	0.0186886	T11F9.10	V	11487152	11488275	+	978	protein_coding	-	-
WBGene00011215	53.9745	61.2726	43.5919	14.8766	15.7988	10.2627	52.9463	13.646	1.95213	0.00160301	0.0186886	R10E9.3	III	3960258	3961825	+	774	protein_coding	-	-
WBGene00013672	2117.32	2683.55	2234.32	1544.38	1034.29	475.504	2345.06	1018.06	1.20331	0.00160406	0.0186886	catp-1	I	14436810	14451880	-	3665	protein_coding	Cation transporting ATPase [Source:UniProtKB/TrEMBL;Acc:G5EBE7]	-
WBGene00007076	8.5223	1.91477	0.927488	13.9468	117.964	7.98208	3.78818	46.631	-3.62267	0.00160559	0.0186886	AC8.4	X	226651	227394	-	654	protein_coding	-	-
WBGene00007042	3428.8	3077.99	2644.27	6234.22	5628.57	4191.73	3050.35	5351.51	-0.811053	0.00160621	0.0186886	pbrm-1	I	7495437	7503577	+	6004	protein_coding	PolyBRoMo domain containing [Source:UniProtKB/TrEMBL;Acc:Q565A2]	HMG
WBGene00000469	62.4968	155.096	144.688	52.9978	18.9585	34.2089	120.76	35.3884	1.7671	0.00160655	0.0186886	ces-2	I	14961501	14965361	+	1002	protein_coding	Cell death specification protein 2 [Source:UniProtKB/Swiss-Prot;Acc:Q94126]	TF_bZIP
WBGene00000610	10.4161	40.2101	42.6644	5.57872	0	0	31.0969	1.85957	4.00543	0.0016075	0.0186886	col-33	IV	4263293	4265202	+	990	protein_coding	COLlagen [Source:UniProtKB/TrEMBL;Acc:Q20091]	-
WBGene00007617	2461.05	2430.8	2234.32	3033.89	5008.21	4805.21	2375.39	4282.44	-0.850175	0.00160954	0.0186978	rrbs-1	V	14423776	14425008	-	1126	protein_coding	Ribosome biogenesis regulatory protein homolog [Source:UniProtKB/Swiss-Prot;Acc:Q9XVT0]	-
WBGene00008127	326.688	536.135	383.052	189.676	246.461	123.152	415.292	186.43	1.15461	0.00161053	0.0186978	ddo-1	V	17774187	17777227	-	1126	protein_coding	D-aspartate oxidase 1 [Source:UniProtKB/Swiss-Prot;Acc:O45307]	-
WBGene00016788	189.384	404.973	381.197	191.536	94.7926	72.9791	325.185	119.769	1.43818	0.00161195	0.0187013	C49G7.10	V	4040409	4042004	-	946	protein_coding	-	-
WBGene00011508	281.236	693.146	834.739	230.587	46.343	264.549	603.04	180.493	1.7404	0.00162681	0.0188606	T05H10.3	II	8049049	8050564	-	624	protein_coding	-	-
WBGene00021832	79.5414	106.27	179.933	52.9978	17.9053	38.7701	121.915	36.5577	1.7349	0.00162972	0.0188813	Y54E10A.12	I	3193528	3198838	-	1782	protein_coding	-	-
WBGene00019133	23.673	22.0198	36.172	3.71915	4.213	0	27.2883	2.64405	3.34337	0.00163098	0.0188828	F59H6.2	II	2019654	2022596	+	2300	pseudogene	-	-
WBGene00044253	14.2038	11.4886	19.4772	0.929786	0	0	15.0566	0.309929	5.34036	0.00164755	0.0190614	M117.6	IV	11827744	11828112	-	270	protein_coding	-	-
WBGene00022178	435.584	527.519	603.794	314.268	277.005	248.585	522.299	279.953	0.899024	0.00165318	0.0191133	Y71H2AM.13	III	2734080	2739531	-	1724	protein_coding	-	-
WBGene00013176	1257.51	1494.48	1685.25	934.435	811.003	442.436	1479.08	729.291	1.01954	0.00165804	0.0191563	Y53F4B.39	II	15110144	15116306	+	1442	protein_coding	Beta-lactamase-like protein 2 homolog [Source:UniProtKB/Swiss-Prot;Acc:Q95Q18]	-
WBGene00021369	2433.59	2835.77	2628.5	1734.98	1400.82	737.773	2632.62	1291.19	1.02741	0.00167552	0.0193448	siah-1	IV	3744048	3747655	+	1791	protein_coding	E3 ubiquitin-protein ligase siah-1 [Source:UniProtKB/Swiss-Prot;Acc:Q965X6]	-
WBGene00002133	310.59	451.885	454.469	264.989	141.136	117.451	405.648	174.525	1.21448	0.00168094	0.0193941	inx-11	V	12487266	12493264	+	1747	protein_coding	Innexin-11 [Source:UniProtKB/Swiss-Prot;Acc:Q23157]	-
WBGene00012339	1442.16	1550.96	1209.44	806.125	912.115	559.886	1400.86	759.375	0.883064	0.00168236	0.0193971	W07G4.5	V	13047980	13049238	+	1124	protein_coding	-	-
WBGene00077436	0	0.957384	0.927488	38.1212	14.7455	4.56119	0.628291	19.1426	-4.93248	0.00169009	0.0194597	F46B3.22	V	20623630	20624887	-	585	pseudogene	-	-
WBGene00013699	9.46922	17.2329	63.9967	4.64893	0	0	30.2329	1.54964	4.22515	0.00169012	0.0194597	Y106G6D.2	I	10110982	10111916	+	835	protein_coding	-	-
WBGene00015671	567.206	424.121	489.714	936.295	776.246	896.274	493.68	869.605	-0.816835	0.00169561	0.0195026	C10B5.3	V	8583553	8584554	-	772	protein_coding	-	-
WBGene00012033	1742.34	1783.61	1781.7	1217.09	876.305	519.976	1769.22	871.124	1.02155	0.00169618	0.0195026	T26C5.3	II	9236583	9249123	+	3215	protein_coding	-	-
WBGene00017421	247.147	394.442	404.385	724.304	638.27	637.426	348.658	666.667	-0.935282	0.00169866	0.0195177	cutl-29	X	8262421	8271021	-	1411	protein_coding	CUTiclin-Like [Source:UniProtKB/TrEMBL;Acc:Q19379]	-
WBGene00004384	791.627	762.078	727.15	1244.98	1270.22	1220.12	760.285	1245.11	-0.711692	0.00170427	0.0195687	rnp-1	V	12192273	12194445	+	1653	protein_coding	RNA-binding protein rnp-1 [Source:UniProtKB/Swiss-Prot;Acc:Q10667]	-
WBGene00011239	933.665	687.402	682.631	1095.29	1397.66	1967.01	767.899	1486.66	-0.952796	0.00170544	0.0195687	pges-2	IV	10366333	10367790	-	1223	protein_coding	ProstaGlandin E Synthase homolog [Source:UniProtKB/TrEMBL;Acc:Q21925]	-
WBGene00007684	1287.81	1096.2	1238.2	1730.33	1993.8	2872.41	1207.4	2198.85	-0.864617	0.00170709	0.0195741	C18E9.4	II	8964238	8964901	-	429	protein_coding	-	-
WBGene00009347	828.556	484.436	437.774	338.442	262.26	152.8	583.589	251.167	1.21493	0.00171125	0.0195855	F32H5.1	V	13356101	13358079	-	1246	protein_coding	-	-
WBGene00013511	3.78769	8.61646	25.9697	0	0	0	12.7913	0	6.06719	0.00171148	0.0195855	Y71A12B.15	I	13992582	13996221	+	2277	protein_coding	-	-
WBGene00009358	463.992	318.809	345.025	586.695	688.826	896.274	375.942	723.932	-0.944892	0.0017116	0.0195855	F33C8.4	X	14732283	14734457	+	785	protein_coding	-	-
WBGene00017485	11.3631	19.1477	5.56493	0	0	0	12.0252	0	5.97718	0.00171427	0.0195905	F15E6.4	IV	4291467	4291872	+	298	protein_coding	-	-
WBGene00016805	137.304	226.9	261.552	105.996	69.5146	85.5223	208.585	87.0109	1.26013	0.00171438	0.0195905	C50D2.1	II	111621	114454	+	1877	protein_coding	-	-
WBGene00011768	1750.86	1926.26	2010.79	1348.19	965.831	766.28	1895.97	1026.77	0.884337	0.00171708	0.019608	oac-46	II	8848843	8852096	-	2409	protein_coding	O-ACyltransferase homolog [Source:UniProtKB/TrEMBL;Acc:Q94056]	-
WBGene00001572	1582.31	1178.54	1188.11	1937.67	2453.02	2502.95	1316.32	2297.88	-0.803683	0.00172596	0.0196918	gei-15	X	6820005	6823268	-	1448	protein_coding	GEX Interacting protein [Source:UniProtKB/TrEMBL;Acc:G4SI07]	-
WBGene00004477	69622.4	66251.9	66288.5	94799.2	112184	115487	67387.6	107490	-0.673645	0.00172678	0.0196918	rps-8	IV	7312981	7313864	-	699	protein_coding	40S ribosomal protein S8 [Source:UniProtKB/Swiss-Prot;Acc:P48156]	-
WBGene00004818	14.2038	41.1675	62.1417	6.50851	5.26626	6.84179	39.171	6.20552	2.65878	0.00173085	0.0197249	skr-12	IV	17167253	17168051	+	676	protein_coding	SKR-12; SKp1 Related (Ubiquitin ligase complex component); Skp1p homolog [Source:UniProtKB/TrEMBL;Acc:G5EGD5]	-
WBGene00020422	1514.13	1376.72	1434.82	972.557	821.536	803.91	1441.89	866.001	0.735226	0.0017329	0.0197348	T10F2.2	III	5163766	5165311	-	1120	protein_coding	-	-
WBGene00008566	14.2038	20.1051	24.1147	52.068	72.6743	72.9791	19.4745	65.9071	-1.75718	0.00173492	0.0197443	acox-1.3	I	12946937	12950991	+	1993	protein_coding	Acyl-coenzyme A oxidase [Source:UniProtKB/TrEMBL;Acc:O62138]	-
WBGene00011538	1003.74	973.659	878.331	1251.49	1931.66	1978.42	951.909	1720.52	-0.853724	0.00174429	0.0198375	T06E6.1	V	15393108	15394957	-	1400	protein_coding	-	-
WBGene00007797	78.5945	153.181	265.261	27.8936	24.2248	83.2417	165.679	45.12	1.88149	0.00174588	0.0198409	C29A12.1	V	10812343	10813487	-	964	protein_coding	-	-
WBGene00219950	354.149	305.405	255.987	89.2595	63.1951	197.272	305.18	116.575	1.3909	0.00174696	0.0198409	F46A8.13	I	11237817	11237980	+	164	ncRNA	-	-
WBGene00020036	1270.77	1303.96	1267.88	1823.31	2363.5	2181.39	1280.87	2122.73	-0.72869	0.00175567	0.0199262	R12E2.11	I	4172433	4173739	-	1215	protein_coding	Orotate phosphoribosyltransferase [Source:UniProtKB/Swiss-Prot;Acc:O61790]	-
WBGene00001778	39.7707	42.1249	65.8516	0.929786	14.7455	7.98208	49.2491	7.8858	2.65497	0.00176289	0.0199945	gst-30	II	4933883	4935038	-	718	protein_coding	Glutathione S-Transferase [Source:UniProtKB/TrEMBL;Acc:Q23520]	-
WBGene00012239	740.493	1100.99	1375.46	665.727	358.105	516.555	1072.32	513.462	1.06202	0.00176631	0.0200197	W04A8.4	I	13841895	13843480	-	1486	protein_coding	-	-
WBGene00010931	208.323	223.07	217.96	132.959	81.1003	71.8388	216.451	95.2995	1.18015	0.00177944	0.0201549	M162.5	V	19761051	19766763	+	1476	protein_coding	-	-
WBGene00001230	2735.66	2751.52	2749.07	4342.1	4891.3	4003.59	2745.42	4412.33	-0.684534	0.00178808	0.0202391	eif-3.G	II	8442765	8444239	+	1139	protein_coding	Eukaryotic translation initiation factor 3 subunit G [Source:UniProtKB/Swiss-Prot;Acc:Q19706]	-
WBGene00044371	2.84077	18.1903	16.6948	0	0	0	12.5753	0	6.04215	0.00179238	0.0202741	ZC239.20	II	3206020	3206541	-	522	protein_coding	-	-
WBGene00008207	21.7792	61.2726	155.818	19.5255	10.5325	0	79.6232	10.0193	2.9768	0.00180003	0.0203434	C49F5.3	X	11982791	11983899	-	777	protein_coding	-	-
WBGene00000496	108.896	165.627	211.467	77.1723	64.2483	51.3134	161.997	64.2447	1.33213	0.00180095	0.0203434	chs-1	I	7554855	7559916	+	4381	protein_coding	Chitin synthase chs-1 [Source:UniProtKB/Swiss-Prot;Acc:G5ECD6]	-
WBGene00004059	2337	2711.31	2871.5	1804.72	1530.37	1203.01	2639.94	1512.7	0.803106	0.0018058	0.0203619	pmp-2	II	6884049	6887805	-	2153	protein_coding	Peroxisomal Membrane Protein related [Source:UniProtKB/TrEMBL;Acc:Q18598]	-
WBGene00020576	781.21	749.632	676.139	2141.3	2576.25	679.617	735.66	1799.06	-1.29031	0.0018062	0.0203619	T19D12.1	II	6666898	6673752	+	5958	protein_coding	-	-
WBGene00016087	239.571	353.275	356.155	189.676	127.443	71.8388	316.334	129.653	1.28396	0.00180624	0.0203619	C25A11.2	X	9114368	9116891	+	2187	protein_coding	-	-
WBGene00007917	510.391	503.584	529.595	838.667	784.672	1076.44	514.523	899.927	-0.806272	0.00181805	0.0204812	C34C6.4	II	8696591	8698928	-	1839	protein_coding	-	-
WBGene00022175	458.31	357.104	311.636	725.233	719.37	614.621	375.683	686.408	-0.869815	0.00182118	0.0205027	Y71H2AM.10	III	2707737	2716447	-	3077	protein_coding	-	-
WBGene00014294	330.476	124.46	116.863	596.923	467.643	391.122	190.6	485.229	-1.34853	0.00182423	0.0205232	C53C7.5	X	13042182	13046220	+	2141	pseudogene	-	-
WBGene00022202	581.41	399.229	393.255	781.021	752.021	1103.81	457.965	878.95	-0.940265	0.00182729	0.0205438	Y72A10A.1	X	6129535	6138332	-	1120	protein_coding	-	-
WBGene00020886	3951.5	4734.26	4523.36	2562.49	2567.83	2986.44	4403.04	2705.59	0.702634	0.00182863	0.0205451	ttr-6	X	6596425	6597121	-	575	protein_coding	TransThyretin-Related family domain [Source:UniProtKB/TrEMBL;Acc:O17345]	-
WBGene00007327	28.4077	8.61646	4.63744	53.9276	53.7158	96.9253	13.8872	68.1896	-2.29534	0.00183278	0.0205778	C05C9.3	X	11142971	11152820	-	4402	protein_coding	-	-
WBGene00010765	124.994	89.0367	100.169	45.5595	35.8105	38.7701	104.733	40.0467	1.3854	0.00183913	0.0206272	K10H10.10	II	14508068	14510162	+	994	protein_coding	-	-
WBGene00016219	323.847	139.778	162.31	105.996	68.4613	57.0149	208.645	77.1573	1.43243	0.00183964	0.0206272	pals-24	III	120492	124641	+	906	protein_coding	Protein containing ALS2cr12 (ALS2CR12) signature [Source:UniProtKB/TrEMBL;Acc:Q336K9]	-
WBGene00022386	474.408	470.075	442.412	282.655	247.514	141.397	462.298	223.855	1.04456	0.00184245	0.0206449	Y95B8A.6	I	882918	890194	+	1915	protein_coding	-	-
WBGene00006568	403.389	510.286	652.951	294.742	283.325	163.063	522.209	247.043	1.07873	0.00184745	0.0206869	thk-1	IV	10279457	10281582	-	1035	protein_coding	Thymidine kinase [Source:UniProtKB/TrEMBL;Acc:F3Y5P8]	-
WBGene00018056	43.5584	4.78692	11.1299	35.3319	126.39	160.782	19.8251	107.501	-2.43765	0.00185006	0.0207023	F35F10.6	V	3287995	3289385	-	830	protein_coding	-	-
WBGene00019487	942.187	1011.95	931.198	662.008	462.377	514.274	961.78	546.22	0.815661	0.00185298	0.0207201	ephx-1	II	4004885	4016072	+	3934	protein_coding	EPHeXin (Eph-interacting GEF) homolog [Source:UniProtKB/TrEMBL;Acc:A0A1D3PD25]	-
WBGene00003589	3072.76	3212.02	3229.51	1975.8	1634.65	2163.14	3171.43	1924.53	0.720678	0.00185413	0.0207201	nex-2	III	10325613	10330422	-	2039	protein_coding	Annexin [Source:UniProtKB/TrEMBL;Acc:Q7JMT5]	-
WBGene00006975	3559.48	2594.51	2019.14	7364.84	6423.78	3359.32	2724.38	5715.98	-1.06915	0.00185931	0.0207641	zfp-1	III	8792847	8806305	+	4009	protein_coding	Uncharacterized protein F54F2.2, isoform a [Source:UniProtKB/Swiss-Prot;Acc:P34447]	-
WBGene00013698	45.4522	58.4004	88.1113	21.3851	13.6923	18.2448	63.988	17.774	1.84601	0.00187918	0.0209625	Y106G6D.1	I	10107393	10109000	-	1195	protein_coding	-	-
WBGene00271830	85.223	72.7612	89.0388	34.4021	27.3845	23.9463	82.341	28.5776	1.52326	0.00187958	0.0209625	W09G10.9	II	3521809	3523512	+	235	protein_coding	-	-
WBGene00000616	8744.82	5670.58	6618.55	3137.1	4709.09	3758.42	7011.32	3868.2	0.858071	0.00188673	0.0210282	col-39	II	10704902	10706019	+	1051	protein_coding	Cuticle collagen 39 [Source:UniProtKB/Swiss-Prot;Acc:Q09455]	-
WBGene00000695	105.108	195.306	303.288	76.2425	33.704	90.0835	201.234	66.6767	1.59421	0.00189276	0.0210697	col-121	IV	9394934	9396218	-	1135	protein_coding	COLlagen [Source:UniProtKB/TrEMBL;Acc:Q20880]	-
WBGene00012982	1191.23	1386.29	1426.48	794.967	768.873	850.662	1334.67	804.834	0.729819	0.00189297	0.0210697	jmjd-2	II	14234972	14243603	-	3104	protein_coding	Lysine-specific demethylase 4 [Source:UniProtKB/Swiss-Prot;Acc:Q9U297]	-
WBGene00009006	550.161	864.518	1192.75	520.68	382.33	317.003	869.143	406.671	1.09507	0.00189527	0.0210812	F21D5.1	IV	8725722	8728060	+	2009	protein_coding	Phosphoacetylglucosamine mutase [Source:UniProtKB/TrEMBL;Acc:Q19680]	-
WBGene00022635	567.206	462.416	415.514	778.231	764.66	1233.8	481.712	925.565	-0.941812	0.00190699	0.0211976	ZC581.9	I	6665077	6673840	-	2877	protein_coding	-	-
WBGene00011278	58.7091	110.099	86.2564	19.5255	6.31951	36.4895	85.0215	20.7782	2.0378	0.00190979	0.0212146	R74.2	III	4188160	4189285	+	1078	protein_coding	-	-
WBGene00077437	221.58	162.755	150.253	326.355	346.52	368.316	178.196	347.064	-0.961559	0.00191833	0.0212953	Y59H11AR.6	IV	8597762	8598727	+	541	pseudogene	-	-
WBGene00003534	23.673	33.5084	46.3744	8.36808	3.15975	0	34.5186	3.84261	3.13427	0.00192134	0.0213047	nas-15	X	777721	780514	+	2008	protein_coding	Zinc metalloproteinase nas-15 [Source:UniProtKB/Swiss-Prot;Acc:P55115]	-
WBGene00006349	570.994	521.774	495.278	1105.52	1131.19	701.283	529.349	979.33	-0.887934	0.00192173	0.0213047	sur-2	I	14777139	14787804	-	4916	protein_coding	Mediator of RNA polymerase II transcription subunit 23 [Source:UniProtKB/Swiss-Prot;Acc:Q10669]	-
WBGene00004495	36317.3	34073.3	30609.9	42600	58629.2	105840	33666.8	69023.1	-1.03575	0.00193068	0.0213898	rps-26	I	14759918	14760654	+	480	protein_coding	40S ribosomal protein S26 [Source:UniProtKB/Swiss-Prot;Acc:O45499]	-
WBGene00018232	315.325	280.513	188.28	50.2085	123.23	132.275	261.373	101.904	1.36176	0.0019367	0.0214422	F40E3.5	I	2645273	2657241	-	1230	protein_coding	-	-
WBGene00018413	178.968	154.139	188.28	72.5233	54.7691	98.0656	173.796	75.1193	1.21192	0.00193983	0.0214541	cyp-33C4	V	2236162	2237937	+	1499	protein_coding	CYtochrome P450 family [Source:UniProtKB/TrEMBL;Acc:O16362]	-
WBGene00004364	2731.87	2140.71	1879.09	3479.26	3761.16	4418.65	2250.56	3886.36	-0.788084	0.00194034	0.0214541	ric-4	V	10261131	10270314	-	1239	protein_coding	Synaptosomal-associated protein [Source:UniProtKB/TrEMBL;Acc:A5PEW5]	-
WBGene00017348	289.758	219.241	255.059	374.704	528.732	565.588	254.686	489.675	-0.942428	0.0019446	0.021487	F10E7.6	II	7113080	7113732	+	606	protein_coding	-	-
WBGene00021522	945.975	954.512	900.591	631.325	513.987	498.31	933.692	547.874	0.76857	0.00195914	0.0216314	nhr-274	IV	1637954	1645290	-	2020	protein_coding	Nuclear Hormone Receptor family [Source:UniProtKB/TrEMBL;Acc:U4PEZ8]	GCNF-like
WBGene00019126	279.342	254.664	351.518	497.436	489.762	704.704	295.175	563.967	-0.933439	0.00196026	0.0216314	sam-4	II	5648000	5649074	-	911	protein_coding	-	-
WBGene00012361	905.257	716.123	753.12	1183.62	1361.85	1523.44	791.5	1356.3	-0.77681	0.00196479	0.0216671	mrpl-12	III	10707761	10708518	+	652	protein_coding	Mitochondrial Ribosomal Protein, Large [Source:UniProtKB/TrEMBL;Acc:O18180]	-
WBGene00015349	369.299	465.289	473.946	283.585	192.745	194.991	436.178	223.774	0.961549	0.00196707	0.021678	henn-1	III	8232651	8234591	+	1506	protein_coding	Small RNA 2'-O-methyltransferase [Source:UniProtKB/Swiss-Prot;Acc:P34283]	-
WBGene00016304	285.97	312.107	249.494	163.642	64.2483	129.994	282.524	119.295	1.24249	0.00196972	0.0216929	fbxc-41	II	948432	950507	-	1771	pseudogene	-	-
WBGene00021789	662.845	568.686	633.474	1109.24	1499.83	857.504	621.668	1155.52	-0.894434	0.00197241	0.0217082	nol-6	II	1425758	1437499	-	3303	protein_coding	Nucleolar protein 6 [Source:UniProtKB/TrEMBL;Acc:Q95XY4]	-
WBGene00001399	116.471	131.162	104.806	33.4723	58.9821	44.4716	117.48	45.642	1.3661	0.00197926	0.0217692	fat-7	V	7151353	7153146	-	1126	protein_coding	Delta(9)-fatty-acid desaturase fat-7 [Source:UniProtKB/Swiss-Prot;Acc:G5EGH6]	-
WBGene00021494	517.019	191.477	199.41	90.1893	93.7393	151.66	302.635	111.863	1.43731	0.00198985	0.0218714	Y40B10B.1	V	1960137	1961403	-	1014	protein_coding	-	-
WBGene00011529	1383.45	1523.2	1671.33	1022.77	905.796	730.931	1525.99	886.497	0.783175	0.00199441	0.0219071	T06D8.9	II	11239407	11240988	+	1427	protein_coding	-	-
WBGene00000545	2524.49	3897.51	3164.59	2095.74	1762.09	1532.56	3195.53	1796.8	0.83045	0.00200372	0.0219949	clp-4	III	1807740	1818323	-	2306	protein_coding	CaLPain family [Source:UniProtKB/TrEMBL;Acc:Q8IAA9]	-
WBGene00016599	424.221	406.888	383.052	138.538	275.952	96.9253	404.72	170.472	1.24705	0.00201002	0.0220438	C42D8.1	X	5109504	5112452	+	887	protein_coding	-	-
WBGene00003061	1588.93	1304.91	1412.56	1933.03	2445.65	4082.27	1435.47	2820.31	-0.974144	0.00201082	0.0220438	lpd-5	I	4372255	4373018	-	616	protein_coding	LiPid Depleted [Source:UniProtKB/TrEMBL;Acc:Q9N4L8]	-
WBGene00009270	164.764	253.707	461.889	101.347	104.272	143.678	293.453	116.432	1.33489	0.00201683	0.0220953	F30F8.1	I	7832692	7835453	-	2308	protein_coding	-	-
WBGene00003565	265.138	274.769	233.727	368.195	486.602	708.125	257.878	520.974	-1.01377	0.00201931	0.0221063	ncs-3	X	1054081	1056843	+	887	protein_coding	Neuronal Calcium Sensor family [Source:UniProtKB/TrEMBL;Acc:Q95ZR9]	-
WBGene00011266	51.1338	98.6105	102.951	20.4553	22.1183	35.3492	84.2318	25.9743	1.70193	0.00202048	0.0221063	R13H4.8	V	11839520	11840302	+	705	protein_coding	-	-
WBGene00006418	128.781	120.63	129.848	52.9978	36.8638	63.8567	126.42	51.2394	1.3041	0.00203223	0.0222203	spl-2	V	9144630	9146899	-	1759	protein_coding	Sphingosine Phosphate Lyase [Source:UniProtKB/TrEMBL;Acc:Q17456]	-
WBGene00010697	1969.6	2235.49	2229.68	1461.62	1293.39	1005.74	2144.92	1253.59	0.774549	0.00204761	0.0223614	uda-1	V	10004755	10007482	+	1876	protein_coding	Nucleoside-diphosphatase uda-1 [Source:UniProtKB/Swiss-Prot;Acc:Q9XU84]	-
WBGene00010268	250.934	285.3	378.415	537.417	665.655	517.695	304.883	573.589	-0.911636	0.00204781	0.0223614	arrd-10	II	12938869	12943867	+	1322	protein_coding	ARRestin Domain protein [Source:UniProtKB/TrEMBL;Acc:O62274]	-
WBGene00012900	25.5669	69.889	57.5042	5.57872	14.7455	0	50.9867	6.77474	2.9056	0.00205666	0.0224434	Y46G5A.8	II	12756353	12757677	+	624	protein_coding	-	-
WBGene00013959	554.896	493.053	489.714	820.072	846.814	911.098	512.554	859.328	-0.745369	0.00205916	0.022456	ZK265.7	I	8262039	8268990	+	1406	protein_coding	-	-
WBGene00022194	539.745	360.934	332.041	77.1723	75.8341	273.671	410.907	142.226	1.53317	0.0020619	0.0224713	Y71H2B.4	III	2618963	2619375	+	351	protein_coding	-	-
WBGene00011003	342.786	437.524	263.407	173.87	103.219	196.131	347.906	157.74	1.14129	0.00206637	0.0224985	R04B5.5	V	10087480	10088998	+	1133	protein_coding	-	-
WBGene00195248	102.268	75.6333	102.024	172.94	278.058	177.886	93.3082	209.628	-1.16738	0.00206709	0.0224985	emc-5	II	11496780	11497993	+	627	protein_coding	EMC Endoplasmic Membrane protein Complex (Yeast EMC) homolog [Source:UniProtKB/TrEMBL;Acc:E1B6R8]	-
WBGene00189933	17.0446	2.87215	2.78246	32.5425	35.8105	78.6805	7.5664	49.0112	-2.6942	0.00207587	0.0225659	F38B7.11	V	11547095	11548156	+	546	protein_coding	-	-
WBGene00006288	8.5223	17.2329	8.34739	0	0	0	11.3675	0	5.89617	0.00207599	0.0225659	str-262	V	751326	752779	-	1185	protein_coding	Seven TM Receptor [Source:UniProtKB/TrEMBL;Acc:A0A0K3AS96]	-
WBGene00006529	17593.8	20382.7	22883.9	28629.1	33019.4	44207.1	20286.8	35285.2	-0.798507	0.00208457	0.0226182	tba-2	I	12964674	12966876	-	2100	protein_coding	Tubulin alpha-2 chain [Source:UniProtKB/Swiss-Prot;Acc:P34690]	-
WBGene00001337	3371.04	3412.12	3464.17	5724.7	6509.09	4662.68	3415.77	5632.15	-0.72151	0.00208521	0.0226182	ears-1	I	10336395	10341178	+	3559	protein_coding	Glutamyl(E) Amino-acyl tRNA Synthetase [Source:UniProtKB/TrEMBL;Acc:Q23315]	-
WBGene00198042	6.62845	14.3608	24.1147	0	1.05325	0	15.0346	0.351084	5.33834	0.00208619	0.0226182	T28F4.7	I	7475046	7475283	+	238	ncRNA	-	-
WBGene00002214	313.431	495.925	711.383	246.393	264.366	189.289	506.913	233.35	1.11883	0.00208621	0.0226182	klc-1	IV	11083735	11086050	+	1802	protein_coding	Kinesin Light Chain [Source:UniProtKB/TrEMBL;Acc:H9G2T2]	-
WBGene00018302	342.786	580.175	749.41	280.796	245.407	275.952	557.457	267.385	1.05993	0.00209933	0.0227353	F41G3.6	II	6742914	6744267	+	1071	protein_coding	-	-
WBGene00004201	1166.61	1073.23	1211.3	1685.7	1886.37	2091.31	1150.38	1887.79	-0.714426	0.00210065	0.0227353	prx-19	III	8807482	8809329	-	1238	protein_coding	Putative peroxisomal biogenesis factor 19 [Source:UniProtKB/Swiss-Prot;Acc:P34453]	-
WBGene00007864	69.1253	67.9743	72.344	5.57872	25.278	0	69.8145	10.2856	2.76081	0.00210109	0.0227353	irg-6	IV	12912790	12914969	-	1566	protein_coding	Infection Response protein [Source:UniProtKB/TrEMBL;Acc:H9G327]	-
WBGene00010094	596.561	613.683	754.047	986.503	1319.72	1109.51	654.764	1138.58	-0.798009	0.00211004	0.0228173	tsfm-1	V	12270271	12271551	-	1096	protein_coding	Elongation factor Ts, mitochondrial [Source:UniProtKB/Swiss-Prot;Acc:Q20819]	-
WBGene00021340	377.822	469.118	437.774	230.587	251.727	117.451	428.238	199.922	1.09756	0.00211714	0.0228794	Y34F4.5	III	1026916	1031065	-	772	protein_coding	-	-
WBGene00018903	26.5138	70.8464	75.1265	11.1574	4.213	19.3851	57.4956	11.5852	2.31704	0.00212877	0.0229902	F55G1.7	IV	7466702	7469832	-	1244	protein_coding	-	-
WBGene00015271	130.675	103.397	107.589	39.9808	28.4378	1.1403	113.887	23.1863	2.28781	0.00216146	0.0233191	C01B4.7	V	2494235	2499001	+	1429	protein_coding	-	-
WBGene00008234	157.189	187.647	184.57	73.4531	51.6093	101.487	176.469	75.5163	1.22632	0.00216202	0.0233191	C50F4.9	V	9523167	9524199	-	527	protein_coding	-	-
WBGene00001852	1914.68	2658.66	1734.4	1360.28	729.903	1152.84	2102.58	1081.01	0.959598	0.00216842	0.0233731	hil-1	V	14949777	14952796	+	907	protein_coding	Histone H1.X [Source:UniProtKB/Swiss-Prot;Acc:Q18336]	-
WBGene00015504	175.181	281.471	263.407	141.328	94.7926	64.997	240.019	100.372	1.25466	0.00217341	0.0234118	C06A5.6	I	5981778	5985869	-	3068	protein_coding	-	-
WBGene00004499	36424.3	33833.9	32796	46097.9	55708.6	87237.3	34351.4	63014.6	-0.875309	0.00217962	0.0234635	rps-30	V	7776576	7777236	+	489	protein_coding	40S ribosomal protein S30 [Source:UniProtKB/TrEMBL;Acc:Q18231]	-
WBGene00001522	338.051	539.965	580.607	266.849	265.419	183.588	486.208	238.619	1.02605	0.00218898	0.0235491	gbh-1	II	10690452	10693863	-	1416	protein_coding	Probable gamma-butyrobetaine dioxygenase [Source:UniProtKB/Swiss-Prot;Acc:Q19000]	-
WBGene00220094	554.896	359.976	305.143	1102.73	1032.19	524.537	406.672	886.483	-1.12464	0.00219086	0.0235542	T25C12.12	X	11484826	11484924	+	99	snoRNA	-	-
WBGene00009442	101.321	86.1646	79.7639	27.8936	35.8105	35.3492	89.083	33.0178	1.43405	0.00220236	0.0236626	F35G12.5	III	4584583	4586753	+	1439	protein_coding	-	-
WBGene00009850	932.718	814.734	708.601	483.489	509.773	417.349	818.684	470.204	0.799717	0.00220773	0.0237051	F48F7.5	X	13975660	13976920	+	882	protein_coding	-	-
WBGene00001682	2145.72	1834.35	2076.64	2825.62	3192.4	5540.71	2018.91	3852.91	-0.932238	0.00222604	0.0238863	gpc-2	I	6757763	6758178	+	365	protein_coding	G Protein, Gamma subunit; Heterotrimeric G protein gamma subunit 2 [Source:UniProtKB/TrEMBL;Acc:G5ECT6]	-
WBGene00019008	634.438	524.646	613.069	288.234	268.579	401.385	590.718	319.399	0.887973	0.0022287	0.0238995	pdxk-1	I	4848425	4850717	+	1227	protein_coding	Putative pyridoxal kinase [Source:UniProtKB/Swiss-Prot;Acc:O01824]	-
WBGene00220246	197.907	136.906	145.616	313.338	266.473	391.122	160.143	323.644	-1.01464	0.00223383	0.0239393	ZK858.10	I	9122524	9122693	+	170	snoRNA	-	-
WBGene00007228	1426.06	1867.86	1683.39	1104.59	981.63	762.859	1659.1	949.692	0.804491	0.00225122	0.0241102	acs-7	II	9292017	9294050	+	1696	protein_coding	Fatty Acid CoA Synthetase family [Source:UniProtKB/TrEMBL;Acc:Q17577]	-
novel.109	167.605	190.519	115.008	244.534	333.881	449.277	157.711	342.564	-1.1184	0.00225661	0.0241372	-	II	14089411	14089879	-	427	-	- && - && -	-
WBGene00017467	408.123	1225.45	722.513	438.859	220.129	310.161	785.363	323.05	1.28101	0.00225778	0.0241372	F14F9.4	V	5132741	5137100	+	2852	protein_coding	-	-
WBGene00018885	243.359	284.343	245.784	479.77	733.063	363.755	257.829	525.529	-1.02758	0.0022588	0.0241372	drd-5	X	8344700	8346408	-	1238	protein_coding	Dietary restriction down regulated [Source:UniProtKB/TrEMBL;Acc:Q20840]	-
WBGene00009963	91.8514	61.2726	73.2715	13.9468	24.2248	0	75.4652	12.7239	2.56152	0.00225953	0.0241372	fipr-26	I	8946686	8947201	-	298	protein_coding	FIP (Fungus-Induced Protein) Related [Source:UniProtKB/TrEMBL;Acc:Q9U3E7]	-
WBGene00007355	1047.3	1155.56	1478.42	1715.46	2238.16	2671.72	1227.09	2208.44	-0.847576	0.0022627	0.0241557	rpb-6	II	10579366	10579955	+	590	protein_coding	Probable DNA-directed RNA polymerases I, II, and III subunit RPABC2 [Source:UniProtKB/Swiss-Prot;Acc:Q17684]	-
WBGene00006367	295.44	241.261	255.987	489.997	606.673	393.403	264.229	496.691	-0.910801	0.00226793	0.024196	sym-2	II	9178514	9188331	-	2229	protein_coding	RNA-binding protein sym-2 [Source:UniProtKB/Swiss-Prot;Acc:Q22708]	-
WBGene00004470	78238.5	73969.4	71688.3	95570	127007	195957	74632.1	139511	-0.902512	0.00227686	0.0242759	rps-1	III	4475918	4476887	+	876	protein_coding	40S ribosomal protein S3a [Source:UniProtKB/Swiss-Prot;Acc:P48154]	-
WBGene00004433	34586.3	32216	29898.5	40646.5	57119.9	80673.8	32233.6	59480.1	-0.883833	0.00228728	0.0243714	rpl-21	III	8129551	8130227	-	534	protein_coding	60S ribosomal protein L21 [Source:UniProtKB/Swiss-Prot;Acc:P34334]	-
WBGene00014001	2068.08	2125.39	2030.27	1531.36	1038.51	932.764	2074.58	1167.54	0.82891	0.00229208	0.0244071	pyk-2	IV	10909915	10913078	+	1725	protein_coding	Pyruvate kinase [Source:UniProtKB/TrEMBL;Acc:Q23539]	-
WBGene00018636	153.401	222.113	331.113	96.6978	89.5263	118.591	235.542	101.605	1.21399	0.00230925	0.0245592	oef-1	IV	7548417	7551511	+	1359	protein_coding	Oocyte Excluded Factor [Source:UniProtKB/TrEMBL;Acc:Q20629]	-
WBGene00001388	103.214	113.929	209.612	53.9276	52.6626	59.2955	142.252	55.2952	1.36403	0.00230931	0.0245592	far-4	V	12998427	12999659	-	712	protein_coding	Fatty Acid/Retinol binding protein [Source:UniProtKB/TrEMBL;Acc:Q19477]	-
WBGene00011743	558.684	708.464	675.211	808.914	1272.33	1846.14	647.453	1309.13	-1.01538	0.00231094	0.0245609	T13F2.2	IV	9796688	9797354	-	533	protein_coding	Putative RNA polymerase II transcriptional coactivator [Source:UniProtKB/Swiss-Prot;Acc:Q94045]	PC4
WBGene00000902	127.834	140.735	127.066	50.2085	10.5325	57.0149	131.879	39.252	1.74855	0.00231872	0.0245971	daf-6	X	14888488	14894297	+	2905	protein_coding	-	-
WBGene00021820	1559.58	1826.69	1845.7	1149.22	1024.81	605.498	1743.99	926.509	0.912038	0.00231902	0.0245971	nipa-1	III	3112428	3127124	-	1646	protein_coding	NIPA1 (NonImprinted gene in Prader-Willi/Angelman syndrome region 1) homolog [Source:UniProtKB/TrEMBL;Acc:A3KFD2]	-
WBGene00020883	194.119	202.965	150.253	308.689	339.147	399.104	182.446	348.98	-0.935301	0.00231961	0.0245971	fbxa-64	V	3276956	3278147	-	1089	protein_coding	F-box A protein [Source:UniProtKB/TrEMBL;Acc:P91522]	-
WBGene00021589	43.5584	54.5709	51.9393	100.417	106.378	173.325	50.0229	126.707	-1.33922	0.00232023	0.0245971	Y46D2A.1	II	3324021	3326431	+	1464	protein_coding	-	-
WBGene00019154	64.3907	87.1219	140.051	47.4191	9.47926	13.6836	97.1878	23.5273	2.03689	0.00232428	0.0246191	glf-1	IV	5885835	5889821	+	1679	protein_coding	GaLactoFuranose synthesis (UGM, UDP-galactopyranose mutase); UDP-galactopyranose mutase [Source:UniProtKB/TrEMBL;Acc:G5ECS4]	-
WBGene00001681	321.006	266.153	277.319	572.748	545.584	436.734	288.159	518.356	-0.847521	0.00232526	0.0246191	gpc-1	X	12881126	12884989	-	1111	protein_coding	Guanine nucleotide-binding protein subunit gamma [Source:UniProtKB/Swiss-Prot;Acc:P54406]	-
WBGene00005657	151.507	239.346	275.464	115.294	72.6743	102.627	222.106	96.8649	1.19647	0.00232963	0.0246499	srr-6	V	5012994	5015059	+	1233	protein_coding	Serpentine Receptor, class R [Source:UniProtKB/TrEMBL;Acc:O16246]	-
WBGene00018475	990.48	798.458	836.594	1231.97	1412.41	2618.12	875.177	1754.17	-1.00286	0.0023404	0.0247417	mrpl-14	II	7308702	7310115	-	1155	protein_coding	Mitochondrial Ribosomal Protein, Large [Source:UniProtKB/TrEMBL;Acc:Q20430]	-
WBGene00010066	25.5669	67.9743	117.791	16.7362	9.47926	21.6657	70.444	15.9604	2.14418	0.00234234	0.0247417	F54F7.6	X	11865383	11866827	+	1186	protein_coding	-	-
WBGene00008450	435.584	389.655	418.297	755.916	695.146	652.25	414.512	701.104	-0.758437	0.00234275	0.0247417	E01G6.2	X	12256644	12258971	+	1045	protein_coding	-	-
WBGene00007564	665.686	654.851	673.356	869.35	1250.21	1498.35	664.631	1205.97	-0.859177	0.00234542	0.0247542	mrps-22	II	10582618	10584236	+	1429	protein_coding	Mitochondrial Ribosomal Protein, Small [Source:UniProtKB/TrEMBL;Acc:Q9U3Q0]	-
WBGene00013208	75.7537	149.352	283.811	41.8404	13.6923	77.5402	169.639	44.3576	1.93794	0.0023545	0.0248344	Y54G9A.5	II	13722964	13725037	+	874	protein_coding	-	-
WBGene00004148	1832.29	1505.01	1198.31	2786.57	2684.74	2342.17	1511.87	2604.49	-0.78476	0.00235986	0.0248753	pqn-65	X	4610926	4620423	-	6766	protein_coding	Prion-like-(Q/N-rich)-domain-bearing protein [Source:UniProtKB/TrEMBL;Acc:H2KYH2]	-
WBGene00001646	147.72	153.181	127.066	210.132	295.964	395.683	142.656	300.593	-1.07421	0.0023644	0.0249013	gna-1	V	10319535	10320158	-	624	protein_coding	Glucosamine 6-phosphate N-acetyltransferase [Source:UniProtKB/Swiss-Prot;Acc:Q17427]	-
WBGene00011030	396.76	453.8	473.946	278.006	154.828	59.2955	441.502	164.043	1.42578	0.00236531	0.0249013	R05D7.5	I	12183688	12189007	+	1334	protein_coding	-	-
WBGene00019554	258.51	192.434	195.7	401.668	403.395	386.561	215.548	397.208	-0.881986	0.00237338	0.0249705	K09C4.10	X	3276020	3280230	-	3326	protein_coding	-	-
WBGene00002069	965.86	711.336	593.592	400.738	325.455	469.803	756.929	398.665	0.925212	0.00238355	0.0250617	ikb-1	I	9685398	9688653	+	2011	protein_coding	I Kappa B homolog; IKB-1 [Source:UniProtKB/TrEMBL;Acc:G5EFS1]	-
WBGene00011505	17.9915	44.997	63.0692	10.2277	5.26626	0	42.0192	5.16464	3.00053	0.00238956	0.0250958	pzf-1	V	15926425	15928425	-	1817	protein_coding	Paired Zinc Finger protein [Source:UniProtKB/TrEMBL;Acc:G5EGG3]	-
WBGene00008145	134.463	208.71	251.349	108.785	67.4081	74.1194	198.174	83.4375	1.24591	0.00238979	0.0250958	set-5	V	14698957	14707601	+	4835	protein_coding	SET (Trithorax/polycomb) domain containing [Source:UniProtKB/TrEMBL;Acc:K8ESG9]	-
WBGene00003390	652.429	803.245	969.225	1286.82	1312.35	1707.03	808.3	1435.4	-0.828265	0.00240045	0.0251919	mog-2	II	4324361	4326089	+	990	protein_coding	Probable U2 small nuclear ribonucleoprotein A' [Source:UniProtKB/Swiss-Prot;Acc:Q9BLB6]	-
WBGene00011833	206.429	147.437	205.902	367.266	403.395	307.88	186.589	359.514	-0.94632	0.0024269	0.0254454	T19B10.5	V	11234650	11237428	+	2017	protein_coding	-	-
WBGene00001639	13.2569	4.78692	15.7673	0	0	0	11.2704	0	5.88439	0.00242764	0.0254454	gly-14	III	3490363	3493234	-	1380	protein_coding	GLYcosylation related; UDP-N-acetylglucosamine:a-3-D-mannoside b-1,2-N-acetylglucosaminyltransferase I [Source:UniProtKB/TrEMBL;Acc:G5EFK6]	-
WBGene00017720	196.013	224.028	227.234	105.996	112.698	42.191	215.758	86.9615	1.30812	0.00244546	0.0256161	F22F7.2	V	2122866	2127299	+	1544	protein_coding	-	-
WBGene00044696	1462.99	807.075	802.277	516.031	615.099	321.564	1024.12	484.231	1.0802	0.00245055	0.0256533	F52E1.14	V	8383922	8384867	+	694	protein_coding	-	-
WBGene00009349	554.896	385.826	313.491	217.57	228.555	104.907	418.071	183.678	1.18513	0.00247186	0.0258397	F32H5.3	V	13359334	13360024	+	648	protein_coding	-	-
WBGene00016436	381.609	580.175	480.439	805.195	853.133	890.573	480.741	849.634	-0.821508	0.00247215	0.0258397	C35B1.7	IV	4109067	4110471	+	440	protein_coding	-	-
WBGene00015947	518.913	577.302	496.206	258.481	286.484	347.791	530.807	297.585	0.835744	0.0024743	0.0258397	C18A11.1	X	8069328	8070289	+	780	protein_coding	-	-
WBGene00013729	240.518	336.999	510.118	191.536	110.591	177.886	362.545	160.005	1.17975	0.00247454	0.0258397	Y111B2A.3	III	12496538	12499352	+	2493	protein_coding	-	-
WBGene00009727	135.41	284.343	370.068	119.942	88.4731	17.1045	263.273	75.1733	1.80489	0.00247651	0.0258441	lips-1	X	12492865	12495862	+	1247	protein_coding	LIPaSe related [Source:UniProtKB/TrEMBL;Acc:Q20437]	-
WBGene00017374	1244.26	1483.95	1253.96	699.199	837.335	852.943	1327.39	796.492	0.737136	0.00248507	0.0259161	ttr-41	II	4727326	4727869	-	497	protein_coding	TransThyretin-Related family domain [Source:UniProtKB/TrEMBL;Acc:Q86NH9]	-
WBGene00008117	4714.72	5066.48	5275.55	3457.88	2881.69	3158.62	5018.92	3166.07	0.664637	0.00248651	0.0259161	gsr-1	III	3650905	3652973	+	1749	protein_coding	Glutathione reductase, mitochondrial [Source:UniProtKB/Swiss-Prot;Acc:Q93379]	-
WBGene00008810	299.227	603.152	486.931	227.798	103.219	253.146	463.103	194.721	1.25001	0.00248972	0.0259334	cyp-13A12	III	13024547	13028012	+	1721	protein_coding	CYtochrome P450 family [Source:UniProtKB/TrEMBL;Acc:O17807]	-
WBGene00009926	434.637	825.265	1212.23	490.927	234.875	314.722	824.043	346.841	1.24782	0.00249292	0.0259506	noah-2	IV	14091254	14096617	+	2557	protein_coding	NOmpA Homolog (Drosophila nompA: no mechanoreceptor potential A) [Source:UniProtKB/TrEMBL;Acc:Q9XUE5]	-
WBGene00012095	105.108	100.525	151.18	36.2617	52.6626	52.4537	118.938	47.126	1.33848	0.00250369	0.0260465	pssy-2	III	13471804	13475385	+	1647	protein_coding	PhosphatidylSerine SYnthase [Source:UniProtKB/TrEMBL;Acc:O18143]	-
WBGene00001702	1861.65	1810.41	1729.76	2391.41	2955.42	4907.84	1800.61	3418.22	-0.92461	0.00250695	0.0260642	grd-13	IV	3438312	3439503	+	607	protein_coding	GRounDhog (Hedgehog-like family) [Source:UniProtKB/TrEMBL;Acc:Q7Z2A9]	-
WBGene00007143	5681.53	6637.54	6209.53	4237.04	3939.16	3213.36	6176.2	3796.52	0.701951	0.00251435	0.0261248	B0334.3	II	11489605	11493039	-	2084	protein_coding	-	-
WBGene00017964	9504.25	12471.8	11877.4	6315.11	7918.34	6179.27	11284.5	6804.24	0.729837	0.00251842	0.0261509	F31F7.1	V	6276439	6278160	+	1722	protein_coding	-	-
WBGene00011531	1042.56	703.677	625.127	1728.47	1586.2	1148.28	790.455	1487.65	-0.912503	0.00256148	0.0265659	rsbp-1	I	9070247	9075077	-	1741	protein_coding	R-Seven Binding Protein (R7BP) homolog [Source:UniProtKB/TrEMBL;Acc:Q9U379]	-
WBGene00017591	7738.24	9950.09	9602.28	4775.38	6647.07	4301.2	9096.87	5241.22	0.79546	0.00256157	0.0265659	F19C7.1	IV	4605786	4608216	+	1031	protein_coding	-	-
WBGene00006804	1162.82	1712.76	2104.47	974.416	968.991	704.704	1660.02	882.704	0.910967	0.00256889	0.0266253	unc-71	III	12881037	12891738	-	3416	protein_coding	Disintegrin and metalloproteinase domain-containing protein unc-71 [Source:UniProtKB/Swiss-Prot;Acc:G5EFD5]	-
WBGene00005833	398.654	746.759	729.005	385.861	277.005	157.361	624.806	273.409	1.191	0.00257155	0.0266365	srw-86	V	19400142	19400715	-	528	protein_coding	Serpentine Receptor, class W [Source:UniProtKB/TrEMBL;Acc:O62076]	-
WBGene00017143	71.0191	226.9	269.899	86.4701	35.8105	58.1552	189.273	60.1453	1.65196	0.00257394	0.0266446	EEED8.15	II	5419233	5421093	+	1322	protein_coding	-	-
WBGene00000740	13270.2	10940	11262.5	13659.5	22670.2	35269.4	11824.2	23866.4	-1.01321	0.0025807	0.0266981	col-167	X	6323297	6324539	+	1086	protein_coding	COLlagen [Source:UniProtKB/TrEMBL;Acc:Q22379]	-
WBGene00015186	1734.76	1956.89	2080.35	1348.19	1045.88	676.197	1924	1023.42	0.910226	0.00258514	0.0267275	misc-1	II	286625	288850	+	1170	protein_coding	Mitochondrial 2-oxoglutarate/malate carrier protein [Source:UniProtKB/Swiss-Prot;Acc:P90992]	-
WBGene00019006	478.195	734.313	776.307	335.653	371.798	367.176	662.939	358.209	0.888311	0.00259039	0.0267653	spg-20	I	6550536	6552665	-	1634	protein_coding	SPG (Spastic paraplegia) [Source:UniProtKB/TrEMBL;Acc:O44735]	-
WBGene00004417	55102.3	50567.1	48653.2	66653.6	88071.8	109451	51440.9	88059	-0.775549	0.00260389	0.0268881	rpl-6	III	7208432	7209863	+	785	protein_coding	60S ribosomal protein L6 [Source:UniProtKB/Swiss-Prot;Acc:P47991]	-
WBGene00003620	2498.93	2196.24	2020.07	1541.59	1169.11	639.707	2238.41	1116.8	1.00265	0.0026083	0.0269134	nhr-21	II	7339229	7349124	+	1695	protein_coding	Nuclear Hormone Receptor family [Source:UniProtKB/TrEMBL;Acc:H2KZU4]	Miscellaneous
WBGene00008844	38.8238	81.3776	127.066	12.0872	0	26.2268	82.4224	12.7714	2.69623	0.00260956	0.0269134	F15A4.10	II	12484544	12485160	-	380	protein_coding	-	-
WBGene00021005	32.1953	3.82954	2.78246	0	0	0	12.9358	0	6.08273	0.00261117	0.0269134	ule-1	I	2219471	2222313	-	803	protein_coding	Uterine Lumin Expressed/locailized [Source:UniProtKB/TrEMBL;Acc:X5M5P2]	-
WBGene00077536	20.8323	20.1051	16.6948	52.068	36.8638	133.415	19.2107	74.1156	-1.94567	0.00261543	0.0269407	F38B7.10	V	11545536	11546376	+	738	protein_coding	-	-
WBGene00010872	646.748	561.027	511.046	374.704	293.857	296.477	572.94	321.679	0.832003	0.00261958	0.0269668	M05B5.4	I	7188465	7190581	+	1419	protein_coding	-	-
WBGene00020499	235.783	278.599	304.216	426.772	579.288	483.486	272.866	496.515	-0.863337	0.00263069	0.0270645	mrps-18.C	II	6736203	6736793	+	493	protein_coding	Mitochondrial Ribosomal Protein, Small [Source:UniProtKB/TrEMBL;Acc:Q22483]	-
WBGene00011123	660.004	680.7	699.326	416.544	434.993	344.37	680.01	398.636	0.770056	0.00264494	0.0271944	nuaf-3	IV	11184243	11186000	+	943	protein_coding	NADH:Ubiquinone oxidoreductase Assembly Factor [Source:UniProtKB/TrEMBL;Acc:Q93931]	-
WBGene00010909	474.408	378.167	419.224	587.625	727.796	1253.19	423.933	856.203	-1.01356	0.00265857	0.0273177	cisd-3.1	III	4542881	4546025	+	727	protein_coding	CDGSH Iron Sulfur Domain protein homolog [Source:UniProtKB/TrEMBL;Acc:Q9U3A1]	-
WBGene00022569	884.425	802.288	746.628	1458.83	1346.05	1198.45	811.113	1334.45	-0.718467	0.00267019	0.0274203	ZC239.6	II	3209478	3211181	+	1552	protein_coding	-	-
WBGene00014015	1392.92	1220.66	865.346	2289.13	2156	1740.09	1159.64	2061.74	-0.83034	0.00267726	0.027476	panl-3	III	9819294	9823120	+	2594	protein_coding	PAN2-PAN3 deadenylation complex subunit PAN3 [Source:UniProtKB/Swiss-Prot;Acc:P34653]	-
WBGene00000885	96.586	137.863	217.96	53.9276	40.0235	75.2597	150.803	56.4036	1.42074	0.0027038	0.0277313	cyn-9	III	3697821	3699640	-	1012	protein_coding	Peptidyl-prolyl cis-trans isomerase 9 [Source:UniProtKB/Swiss-Prot;Acc:Q09637]	-
WBGene00002243	927.036	1041.63	934.908	1729.4	1456.65	1518.88	967.859	1568.31	-0.696481	0.00270595	0.0277364	lad-2	IV	2964365	2978461	-	3859	protein_coding	L1 CAM ADhesion molecule homolog [Source:UniProtKB/TrEMBL;Acc:H2L0R2]	-
WBGene00003175	7448.49	10182.7	8414.17	15599	14401.1	12705.2	8681.8	14235.1	-0.713409	0.00271189	0.0277803	mec-12	III	3131574	3139234	-	1612	protein_coding	Tubulin alpha-3 chain Detyrosinated tubulin alpha-3 chain [Source:UniProtKB/Swiss-Prot;Acc:P91910]	-
WBGene00015885	130.675	170.414	179.005	274.287	291.751	368.316	160.032	311.451	-0.959934	0.00271489	0.0277939	fbxa-65	V	3345307	3346484	-	1088	protein_coding	F-box A protein [Source:UniProtKB/TrEMBL;Acc:O45159]	-
WBGene00001612	118.365	67.9743	97.3862	180.379	185.372	267.97	94.5752	211.24	-1.15829	0.00272238	0.0278536	glr-1	III	8584186	8588642	-	2986	protein_coding	Glutamate receptor 1 [Source:UniProtKB/Swiss-Prot;Acc:P34299]	-
WBGene00021757	583.304	585.919	580.607	873.999	1013.23	974.955	583.277	954.06	-0.709749	0.00272976	0.027912	taco-1	III	284117	289444	+	1101	protein_coding	Translational Activator of Cytochrome c Oxidase [Source:UniProtKB/TrEMBL;Acc:Q965T4]	-
WBGene00014073	51.1338	66.0595	37.0995	130.17	108.485	139.116	51.4309	125.924	-1.29226	0.00273347	0.0279328	ZK757.1	III	9868594	9871124	-	1022	protein_coding	-	-
WBGene00020571	43.5584	73.7186	81.6189	18.5957	14.7455	0	66.2986	11.1137	2.56388	0.00273667	0.0279485	lpr-7	X	656188	658511	+	1118	protein_coding	LiPocalin-Related protein [Source:UniProtKB/TrEMBL;Acc:B1Q244]	-
WBGene00016247	93.7452	202.008	199.41	67.8744	60.0353	71.8388	165.054	66.5828	1.30998	0.00274013	0.0279667	C30B5.6	II	6219526	6222658	-	1811	protein_coding	-	-
WBGene00020362	1.89384	7.65907	27.8246	0	0	0	12.4592	0	6.02928	0.00274976	0.0280478	fbxb-10	II	1817281	1818400	-	1065	protein_coding	F-box B protein [Source:UniProtKB/TrEMBL;Acc:O76637]	-
WBGene00014883	15.1507	18.1903	24.1147	2.78936	0	0	19.1519	0.929786	4.28262	0.00275708	0.0281054	Y39C12A.2	IV	12224335	12225071	-	574	pseudogene	-	-
WBGene00001514	196.013	283.386	401.602	84.6106	100.059	181.307	293.667	121.992	1.26988	0.00276072	0.0281254	xnd-1	III	5604460	5607549	+	2310	protein_coding	X chromosome NonDisjunction factor [Source:UniProtKB/TrEMBL;Acc:O45134]	-
WBGene00010036	20.8323	31.5937	74.199	3.71915	7.37276	11.403	42.2083	7.49829	2.50575	0.0027669	0.0281712	cpar-1	III	9434057	9435100	+	897	protein_coding	Histone H3-like centromeric protein cpar-1 [Source:UniProtKB/Swiss-Prot;Acc:P34440]	-
WBGene00012766	793.52	768.779	690.978	410.966	485.549	445.856	751.093	447.457	0.747447	0.00277605	0.0282472	Y41E3.8	IV	15028358	15029136	-	636	protein_coding	-	-
WBGene00013403	14.2038	22.0198	41.7369	1.85957	5.26626	0	25.9869	2.37528	3.44225	0.00278527	0.0283237	fbxb-100	I	14090738	14096346	-	967	protein_coding	F-box B protein [Source:UniProtKB/TrEMBL;Acc:Q9XWG1]	-
WBGene00219908	46.3992	55.5283	81.6189	17.6659	12.639	22.806	61.1821	17.7036	1.79172	0.0027883	0.0283373	F20C5.10	IV	8752805	8752860	-	56	ncRNA	-	-
WBGene00004783	1686.47	1567.24	1335.58	2368.17	2774.26	2338.75	1529.76	2493.73	-0.705013	0.00279535	0.0283917	seu-1	IV	6329578	6333554	+	2511	protein_coding	Suppressor of Ectopic Unc-5 [Source:UniProtKB/TrEMBL;Acc:H2L0L8]	-
WBGene00021279	24.62	60.3152	82.5464	17.6659	2.1065	0	55.8272	6.59081	3.05694	0.00280003	0.0284219	Y23H5B.8	I	2546897	2548358	-	625	protein_coding	-	-
WBGene00004264	110.79	194.349	144.688	39.051	73.7276	7.98208	149.942	40.2536	1.89457	0.00280985	0.0285043	qua-1	II	8198803	8204001	+	3850	protein_coding	-	-
WBGene00002144	116.471	243.176	364.503	73.4531	16.852	115.17	241.383	68.4917	1.81868	0.00281391	0.0285282	inx-22	I	3608395	3612301	+	1775	protein_coding	Innexin [Source:UniProtKB/TrEMBL;Acc:Q9N3R5]	-
WBGene00012000	644.854	766.865	849.579	1180.83	1346.05	1234.94	753.766	1253.94	-0.734198	0.00283508	0.0287254	T24H10.1	II	9099371	9100639	+	1118	protein_coding	Putative transcription elongation factor S-II [Source:UniProtKB/Swiss-Prot;Acc:P52652]	-
WBGene00004727	1822.82	2043.06	2012.65	1338.89	1097.49	1215.56	1959.51	1217.31	0.686665	0.00283682	0.0287256	sax-1	X	3646320	3650150	-	1781	protein_coding	Serine/threonine-protein kinase sax-1 [Source:UniProtKB/Swiss-Prot;Acc:Q2L6W9]	-
WBGene00016722	1587.99	1339.38	1372.68	1943.25	2388.77	3206.52	1433.35	2512.85	-0.809746	0.00284035	0.0287439	C46G7.2	IV	6015195	6017803	+	881	protein_coding	-	-
WBGene00010493	52.0807	109.142	209.612	34.4021	27.3845	0	123.612	20.5955	2.57849	0.00284425	0.028766	meg-2	X	13922663	13926129	-	2890	protein_coding	-	-
WBGene00045388	16.0977	61.2726	7.4199	4.64893	0	0	28.2634	1.54964	4.12983	0.00287349	0.0290441	lfor-1	II	14635795	14636093	-	299	ncRNA	-	-
WBGene00015335	40.7176	56.4857	62.1417	17.6659	6.31951	0	53.115	7.99515	2.71052	0.00287871	0.0290794	acdh-6	III	8561136	8563026	+	1330	protein_coding	Probable acyl-CoA dehydrogenase 6 [Source:UniProtKB/Swiss-Prot;Acc:P34275]	-
WBGene00019427	857.911	1112.48	987.774	684.323	503.454	506.292	986.055	564.69	0.803631	0.00289424	0.0292185	atg-16.2	II	6450889	6453391	-	1882	protein_coding	Autophagic-related protein 16.2 [Source:UniProtKB/Swiss-Prot;Acc:Q09406]	-
WBGene00008205	4156.04	3698.37	4328.59	8938.97	11057	4355.94	4061	8117.31	-0.999203	0.00290978	0.0293577	sams-1	X	11965962	11969784	+	2138	protein_coding	Probable S-adenosylmethionine synthase 1 [Source:UniProtKB/Swiss-Prot;Acc:O17680]	-
WBGene00016066	276.501	243.176	321.838	166.432	131.656	137.976	280.505	145.355	0.94756	0.00291303	0.0293728	acd-2	I	4094179	4098330	+	2302	protein_coding	-	-
WBGene00003651	779.317	819.521	848.651	496.506	456.058	530.238	815.829	494.267	0.723116	0.00291863	0.0294115	nhr-61	II	14816136	14840005	-	1733	protein_coding	Nuclear hormone receptor family member nhr-61 [Source:UniProtKB/Swiss-Prot;Acc:O62389]	Miscellaneous
WBGene00010943	606.03	647.192	558.348	372.844	374.957	303.319	603.856	350.374	0.784746	0.00292163	0.0294239	M176.4	II	9420178	9422196	+	1248	protein_coding	-	-
WBGene00004017	175.181	297.746	364.503	70.6638	9.47926	137.976	279.143	72.7064	1.9426	0.00293119	0.0295025	phg-1	II	10137658	10139216	+	861	protein_coding	Growth arrest-specific protein 1 homolog [Source:UniProtKB/Swiss-Prot;Acc:Q09553]	-
WBGene00011739	240.518	356.147	376.56	164.572	106.378	190.43	324.408	153.793	1.07723	0.00293458	0.0295037	T12G3.4	IV	12048256	12049943	+	1440	protein_coding	-	-
WBGene00015042	81.4353	53.6135	95.5312	26.9638	16.852	30.788	76.86	24.868	1.629	0.00293484	0.0295037	cyp-34A7	V	3961760	3963815	-	1500	protein_coding	CYtochrome P450 family [Source:UniProtKB/TrEMBL;Acc:O44657]	-
WBGene00001251	1063.39	733.356	793.002	1536.01	1452.43	1408.27	863.25	1465.57	-0.763675	0.00293846	0.0295223	elt-3	X	13934883	13941247	+	1588	protein_coding	Erythroid-Like Transcription factor family [Source:UniProtKB/TrEMBL;Acc:E5QCG8]	zf-GATA
WBGene00005023	1105.06	1356.61	1255.82	844.246	626.684	733.211	1239.16	734.714	0.753843	0.00294324	0.0295481	sqv-5	I	9947812	9953387	+	3249	protein_coding	Chondroitin sulfate synthase sqv-5 [Source:UniProtKB/Swiss-Prot;Acc:Q7Z1Z1]	-
WBGene00044987	95.6391	144.565	252.277	69.734	54.7691	64.997	164.16	63.1667	1.3776	0.00294537	0.0295481	K07A1.17	I	9581786	9582583	-	657	protein_coding	-	-
WBGene00007203	638.225	594.535	710.456	345.881	288.591	444.716	647.739	359.729	0.849103	0.00294633	0.0295481	best-1	IV	13108141	13109799	-	1506	protein_coding	Bestrophin homolog 1 [Source:UniProtKB/Swiss-Prot;Acc:Q17528]	-
WBGene00018639	406.229	378.167	365.43	659.219	616.152	643.128	383.275	639.499	-0.73864	0.00294989	0.0295661	tbc-16	X	5897342	5902152	+	2418	protein_coding	TBC (Tre-2/Bub2/Cdc16) domain family [Source:UniProtKB/TrEMBL;Acc:Q20600]	-
WBGene00022775	81.4353	112.014	167.875	55.7872	42.13	38.7701	120.441	45.5625	1.40006	0.00295327	0.0295823	ZK616.5	IV	5391912	5393572	+	1175	protein_coding	-	-
WBGene00003769	1713.93	2120.61	2830.69	825.65	986.896	1590.72	2221.74	1134.42	0.970129	0.00296497	0.0296817	nlp-31	V	3980055	3980622	+	451	protein_coding	Neuropeptide-like protein 31 QWGYGGY-amide GYGGYGGY-amide GYGGY-amide GMYGGY-amide PYGGYGW-amide [Source:UniProtKB/Swiss-Prot;Acc:O44662]	-
WBGene00009380	2205.38	2119.65	2050.68	1609.46	965.831	741.194	2125.23	1105.5	0.942419	0.00296851	0.0296993	F34H10.3	X	9633284	9635647	-	1472	protein_coding	-	-
WBGene00007916	139.197	107.227	159.528	227.798	230.662	452.698	135.317	303.719	-1.16515	0.00297653	0.0297446	C34C6.3	II	8691789	8694180	+	1823	protein_coding	-	-
WBGene00011016	669.474	630.916	543.508	906.542	971.097	1427.65	614.632	1101.76	-0.841693	0.0029766	0.0297446	R04F11.3	V	12314919	12317180	-	1364	protein_coding	-	-
WBGene00022233	1906.15	1819.99	1701.94	1270.09	1024.81	654.531	1809.36	983.144	0.879497	0.00298204	0.0297812	ipla-6	IV	6337653	6340098	+	1937	protein_coding	Intracelllar PhosphoLipase A family [Source:UniProtKB/TrEMBL;Acc:Q8MXR3]	-
WBGene00000223	5519.61	3945.38	3717.37	7333.23	7204.24	7433.6	4394.12	7323.69	-0.737	0.00298382	0.0297812	atf-7	III	4491627	4499043	-	2589	protein_coding	ATF (cAMP-dependent transcription factor) family [Source:UniProtKB/TrEMBL;Acc:Q17801]	TF_bZIP
WBGene00017775	4678.74	4728.52	4880.44	3254.25	3010.19	1878.07	4762.57	2714.17	0.811059	0.00300729	0.0299976	F25B5.3	III	5948890	5953534	+	2335	protein_coding	Putative cytosolic 5'-nucleotidase 3 [Source:UniProtKB/Swiss-Prot;Acc:Q09315]	-
WBGene00017453	3.78769	13.4034	15.7673	0	0	0	10.9861	0	5.84735	0.00301241	0.0300225	F14D2.5	II	3340556	3341260	+	385	protein_coding	-	-
WBGene00015802	757.537	632.831	693.761	1165.95	1291.29	1009.16	694.71	1155.47	-0.734095	0.00301339	0.0300225	kynu-1	X	6106926	6109338	-	1518	protein_coding	Kynureninase [Source:UniProtKB/Swiss-Prot;Acc:Q18026]	-
WBGene00001116	998.055	539.007	346.88	1450.47	1284.97	1296.52	627.981	1343.98	-1.09783	0.00301867	0.0300573	dyc-1	X	14049535	14063884	+	3747	protein_coding	Dystrophin-like protein 1 [Source:UniProtKB/Swiss-Prot;Acc:Q8STF6]	-
WBGene00006728	35526.6	29974.7	30128.5	42839.9	51233.3	69448.7	31876.6	54507.3	-0.773942	0.00302462	0.0300986	ubq-2	III	12977910	12978523	-	488	protein_coding	Ubiquitin-60S ribosomal protein L40 Ubiquitin 60S ribosomal protein L40 [Source:UniProtKB/Swiss-Prot;Acc:P49632]	-
WBGene00013555	53.0276	49.784	59.3592	8.36808	17.9053	0	54.0569	8.75778	2.6188	0.00302973	0.0301314	fbxa-89	III	12236184	12238951	+	976	protein_coding	F-box A protein [Source:UniProtKB/TrEMBL;Acc:Q9XW66]	-
WBGene00004929	1675.1	1608.4	1532.21	3245.88	2871.16	2071.92	1605.24	2729.66	-0.766099	0.00303749	0.0301907	soc-2	IV	5127006	5152485	-	3035	protein_coding	Leucine-rich repeat protein soc-2 [Source:UniProtKB/Swiss-Prot;Acc:Q22875]	-
WBGene00022219	180.862	145.522	126.138	218.5	351.786	358.054	150.841	309.446	-1.03586	0.00305113	0.0303083	Y73B3A.18	X	48483	60774	+	1673	protein_coding	-	-
WBGene00019090	950.709	1219.71	913.575	288.234	365.478	766.28	1028	473.331	1.1199	0.00305411	0.0303199	F59A7.2	V	2015836	2016541	-	464	protein_coding	-	-
WBGene00014120	519.86	564.857	598.23	1057.17	970.044	802.77	560.982	943.327	-0.75009	0.00305628	0.0303234	ZK858.7	I	9141971	9144376	-	1436	protein_coding	-	-
WBGene00017257	40.7176	42.1249	30.6071	91.1191	124.284	79.8208	37.8165	98.4078	-1.38037	0.00306142	0.0303563	F08F1.3	X	8428842	8430520	+	706	protein_coding	-	-
WBGene00007903	76.7007	171.372	172.513	58.5765	1.05325	19.3851	140.195	26.3383	2.40576	0.00306587	0.0303825	lgc-21	X	14064313	14067984	-	1510	protein_coding	Ligand-Gated ion Channel [Source:UniProtKB/TrEMBL;Acc:Q93323]	-
WBGene00009918	939.346	854.944	1058.26	1447.68	2080.17	1416.25	950.851	1648.03	-0.793406	0.00306883	0.0303938	gcsh-2	I	7345932	7347427	-	743	protein_coding	Glycine cleavage system H protein [Source:UniProtKB/TrEMBL;Acc:Q20634]	-
WBGene00013219	771.741	673.041	915.43	1278.46	1234.41	1427.65	786.737	1313.51	-0.739317	0.00308673	0.030553	Y54G11A.11	II	14349783	14350795	+	656	protein_coding	Transcription elongation factor 1 homolog [Source:UniProtKB/Swiss-Prot;Acc:Q9XVZ8]	-
WBGene00018646	171.393	59.3578	44.5194	16.7362	22.1183	34.2089	91.7567	24.3545	1.9181	0.00309131	0.0305628	mul-1	IV	4121342	4123166	-	955	protein_coding	Mucin Like protein [Source:UniProtKB/TrEMBL;Acc:A0A0K3AV21]	-
WBGene00019592	732.917	1191.94	754.975	569.029	372.851	465.241	893.278	469.041	0.928959	0.00309138	0.0305628	K09F6.9	II	2280678	2283395	-	2718	protein_coding	-	-
WBGene00001435	19.8854	41.1675	110.371	14.8766	0	0	57.1413	4.95886	3.4979	0.00309559	0.0305863	fkh-3	X	13421824	13423427	-	1374	protein_coding	ForKHead transcription factor family [Source:UniProtKB/TrEMBL;Acc:A0A078BQN7]	Fork_head
WBGene00020050	83.3291	109.142	124.283	58.5765	23.1715	18.2448	105.585	33.3309	1.65546	0.00309808	0.0305929	R13A5.7	III	7567475	7570133	-	1562	protein_coding	-	-
WBGene00004480	45701.3	40978.9	37579	53017.4	67889.4	113409	41419.7	78105.4	-0.915098	0.00310621	0.030655	rps-11	IV	11602641	11603283	+	545	protein_coding	Ribosomal Protein, Small subunit [Source:UniProtKB/TrEMBL;Acc:Q20206]	-
WBGene00019128	303.015	169.457	127.066	400.738	367.585	558.746	199.846	442.356	-1.14609	0.00311353	0.0307092	F59G1.4	II	5896170	5904588	+	1866	protein_coding	F59G1.4 [Source:UniProtKB/TrEMBL;Acc:G5ECV5]	-
WBGene00019030	303.015	404.973	387.69	163.642	238.035	167.624	365.226	189.767	0.944799	0.00311773	0.0307325	exc-6	III	1103224	1111923	+	2613	protein_coding	Excretory canal abnormal protein 6 [Source:UniProtKB/Swiss-Prot;Acc:Q9TYU9]	-
WBGene00017142	116.471	106.27	104.806	46.4893	53.7158	26.2268	109.182	42.144	1.37017	0.00312283	0.0307646	EEED8.14	II	5412722	5414052	-	1185	protein_coding	-	-
WBGene00011799	129.728	101.483	75.1265	43.7	23.1715	43.3313	102.112	36.7343	1.47424	0.00312658	0.0307793	T16G1.5	V	12937654	12939506	-	1518	protein_coding	-	-
WBGene00006802	405.282	397.314	408.095	658.289	608.779	783.385	403.564	683.484	-0.759845	0.00312801	0.0307793	unc-69	III	10318939	10320021	+	941	protein_coding	Short coiled-coil domain-containing protein UNC-69 splice variant T07A5.6b [Source:UniProtKB/TrEMBL;Acc:G5EDQ5]	-
WBGene00003864	309.643	634.746	855.144	212.921	80.0471	350.071	599.844	214.347	1.48536	0.00314481	0.0309264	oma-1	IV	8888976	8890999	+	1801	protein_coding	CCCH-type zinc finger protein oma-1 [Source:UniProtKB/Swiss-Prot;Acc:G5EC86]	-
WBGene00000198	2427.91	2411.65	2695.28	4190.55	4801.77	3368.44	2511.61	4120.25	-0.714161	0.00316184	0.0310757	art-1	II	6970668	6972235	-	1136	protein_coding	Probable very-long-chain enoyl-CoA reductase art-1 [Source:UniProtKB/Swiss-Prot;Acc:Q9N5Y2]	-
WBGene00020170	64.3907	105.312	114.081	42.7702	21.065	34.2089	94.5946	32.6814	1.53088	0.00316474	0.0310859	T02G5.14	II	7089674	7093102	+	1032	protein_coding	-	-
WBGene00021516	17.0446	22.9772	17.6223	0	3.15975	0	19.2147	1.05325	4.20048	0.00316661	0.031086	Y41D4B.14	IV	1577087	1578889	+	573	protein_coding	-	-
WBGene00009595	917.567	1104.82	1026.73	702.919	504.507	271.391	1016.37	492.939	1.04296	0.00317004	0.0311014	cbp-3	III	9914261	9915883	+	1322	protein_coding	CBP/p300 homolog [Source:UniProtKB/TrEMBL;Acc:Q7JMS5]	-
WBGene00007943	374.034	255.622	282.884	772.653	577.182	429.892	304.18	593.242	-0.964341	0.00319117	0.0312761	C34F6.9	X	11218135	11222811	-	4004	protein_coding	-	-
WBGene00018591	52.0807	78.5055	83.4739	18.5957	31.5975	18.2448	71.3534	22.8127	1.64576	0.00319159	0.0312761	npax-2	X	2147614	2149252	-	702	protein_coding	N-terminal PAX (PAI domain only) protein [Source:UniProtKB/TrEMBL;Acc:Q20551]	PAX
WBGene00002981	9339.49	8806.97	8022.77	6387.63	4500.54	5119.94	8723.08	5336.04	0.709006	0.0031967	0.0313078	lgg-2	IV	10934186	10935914	-	1066	protein_coding	-	-
WBGene00016052	1938.35	2626.1	1816.95	1403.05	1264.95	865.486	2127.13	1177.83	0.852445	0.00320034	0.0313251	dod-3	V	2730594	2731098	-	448	protein_coding	Downstream Of DAF-16 (Regulated by DAF-16) [Source:UniProtKB/TrEMBL;Acc:O76438]	-
WBGene00019497	124.047	103.397	97.3862	40.9106	50.556	44.4716	108.277	45.3128	1.25749	0.00321382	0.0314387	K07E8.6	II	637346	639488	-	1596	protein_coding	-	-
WBGene00021026	1041.61	833.881	863.491	972.557	2158.11	2493.83	912.995	1874.83	-1.03783	0.00322138	0.0314891	W04C9.4	I	461995	462651	+	549	protein_coding	-	-
WBGene00015698	61.5499	85.2072	140.051	36.2617	26.3313	36.4895	95.6026	33.0275	1.53343	0.00322275	0.0314891	kca-1	I	4759820	4761321	-	1402	protein_coding	Kinesin 1 cargo adaptor alternative variant a; Kinesin Cargo Adaptor [Source:UniProtKB/TrEMBL;Acc:G5EBU5]	-
WBGene00015613	70.0722	159.883	232.799	51.1383	24.2248	71.8388	154.252	49.0673	1.65404	0.00324331	0.0316715	C08F1.10	II	1785270	1786309	-	971	protein_coding	-	-
WBGene00011018	1646.7	1399.7	1280.86	769.863	1021.65	515.415	1442.42	768.977	0.907205	0.00325493	0.0317665	R05A10.1	IV	14182377	14190632	+	1042	protein_coding	-	-
WBGene00009895	872.115	837.711	697.471	555.082	437.099	346.651	802.432	446.277	0.84552	0.00326539	0.03185	scl-2	IV	13057678	13059085	+	774	protein_coding	SCP-Like extracellular protein [Source:UniProtKB/TrEMBL;Acc:Q20603]	-
WBGene00001686	306.803	557.197	961.805	253.832	220.129	318.143	608.602	264.035	1.20519	0.00327562	0.0319095	gpd-4	II	10171255	10172497	+	1143	protein_coding	Glyceraldehyde-3-phosphate dehydrogenase 4 [Source:UniProtKB/Swiss-Prot;Acc:P17331]	-
WBGene00004473	58054.8	54426.3	49440.7	67105.5	94814.7	121458	53973.9	94459.3	-0.807425	0.00327601	0.0319095	rps-4	IV	7083694	7084682	-	842	protein_coding	40S ribosomal protein S4 [Source:UniProtKB/Swiss-Prot;Acc:Q9N3X2]	-
WBGene00011561	6930.52	8873.99	8481.87	3166.85	3304.05	6292.16	8095.46	4254.35	0.928287	0.00327723	0.0319095	ttr-15	III	10337840	10339440	+	616	protein_coding	Transthyretin-like protein 15 [Source:UniProtKB/Swiss-Prot;Acc:Q22288]	-
WBGene00007856	218.739	187.647	159.528	318.917	290.697	588.394	188.638	399.336	-1.08123	0.0032805	0.0319228	C31H5.5	I	9048188	9049427	-	798	protein_coding	-	-
WBGene00004914	1970.54	2223.05	2707.34	3107.35	3966.54	4928.37	2300.31	4000.75	-0.798321	0.00329443	0.032023	snr-1	IV	17088058	17088834	+	676	protein_coding	Small nuclear ribonucleoprotein Sm D3 [Source:UniProtKB/Swiss-Prot;Acc:Q17348]	-
WBGene00007132	163.817	256.579	275.464	148.766	56.8756	69.5582	231.953	91.7332	1.33499	0.00329721	0.032023	pals-27	III	4381739	4384141	+	1399	protein_coding	Protein containing ALS2cr12 (ALS2CR12) signature [Source:UniProtKB/TrEMBL;Acc:Q17469]	-
WBGene00000491	352.255	273.812	281.956	495.576	440.259	937.325	302.674	624.387	-1.04409	0.00329814	0.032023	che-12	V	10299473	10307354	-	4298	protein_coding	Crescerin-like protein che-12 [Source:UniProtKB/Swiss-Prot;Acc:Q17423]	-
WBGene00001099	2997.95	3254.15	2711.05	1783.33	2042.25	1026.27	2987.72	1617.28	0.885261	0.00329846	0.032023	dsc-4	IV	315056	320605	-	2877	protein_coding	Defecation Suppressor of Clk-1; Microsomal triglyceride transfer protein [Source:UniProtKB/TrEMBL;Acc:G5ECG7]	-
WBGene00020827	1032.14	1081.84	1162.14	697.34	643.536	696.722	1092.04	679.199	0.685119	0.00330157	0.0320346	T26A8.4	IV	8428961	8431493	-	2187	protein_coding	-	-
WBGene00004986	790.68	630.916	540.725	745.689	1438.74	1866.67	654.107	1350.37	-1.04543	0.00333032	0.0322866	spp-1	III	10355122	10355982	-	504	protein_coding	SaPosin-like Protein family [Source:UniProtKB/TrEMBL;Acc:Q22291]	-
WBGene00012665	731.024	648.149	883.896	1432.8	1626.22	997.761	754.356	1352.26	-0.842186	0.0033314	0.0322866	pph-5	V	19190547	19199080	+	1656	protein_coding	Serine/threonine-protein phosphatase 5 [Source:UniProtKB/Swiss-Prot;Acc:Q9NES8]	-
WBGene00020256	107.949	116.801	86.2564	212.921	376.011	147.098	103.669	245.343	-1.24327	0.00334782	0.0324269	T05C3.6	V	5490370	5493646	+	1663	protein_coding	-	-
WBGene00012641	1440.27	1660.1	1638.87	1095.29	942.66	634.006	1579.75	890.651	0.82626	0.00335826	0.0325092	epg-6	III	10596615	10600184	-	1519	protein_coding	Ectopic P Granules [Source:UniProtKB/TrEMBL;Acc:E3CTH5]	-
WBGene00004062	110.79	65.1021	70.4891	163.642	241.194	156.221	82.127	187.019	-1.18726	0.00336471	0.0325528	pmp-5	V	6662191	6665813	-	2353	protein_coding	Peroxisomal Membrane Protein related [Source:UniProtKB/TrEMBL;Acc:H2L034]	-
WBGene00006416	20.8323	56.4857	75.1265	15.8064	4.213	0	50.8148	6.67312	2.90558	0.00337008	0.0325859	sams-5	IV	6277435	6279572	-	1535	protein_coding	Probable S-adenosylmethionine synthase 5 [Source:UniProtKB/Swiss-Prot;Acc:Q27522]	-
WBGene00011726	316.272	260.408	234.654	164.572	131.656	76.4	270.445	124.21	1.11988	0.00337478	0.0326124	lpr-2	IV	11779216	11786969	+	3421	protein_coding	LiPocalin-Related protein [Source:UniProtKB/TrEMBL;Acc:G5EEB8]	-
WBGene00021495	168.552	192.434	153.035	292.883	319.135	327.265	171.341	313.094	-0.869584	0.00338454	0.0326879	sqst-2	IV	7327110	7329108	-	1653	protein_coding	SeQueSTosome related [Source:UniProtKB/TrEMBL;Acc:Q9N3Z0]	-
WBGene00007131	144.879	235.516	217.96	124.591	62.1418	59.2955	199.452	82.0096	1.27851	0.00339282	0.032749	pals-26	III	4376503	4379200	+	1663	protein_coding	Protein containing ALS2cr12 (ALS2CR12) signature [Source:UniProtKB/TrEMBL;Acc:Q17466]	-
WBGene00009067	12.31	26.8067	32.4621	4.64893	0	0	23.8596	1.54964	3.88166	0.00339864	0.0327862	F23A7.1	X	16217392	16217666	+	275	protein_coding	-	-
WBGene00007650	457.363	493.053	458.179	664.797	858.4	847.241	469.532	790.146	-0.750583	0.00340313	0.0328106	ugt-23	X	9922910	9925173	-	1713	protein_coding	UDP-glucuronosyltransferase [Source:UniProtKB/TrEMBL;Acc:Q0G821]	-
WBGene00018701	9875.45	11364.1	10679.1	7293.24	6968.31	4688.9	10639.6	6316.82	0.752101	0.00340686	0.0328276	pccb-1	X	3089496	3092457	+	2094	protein_coding	Propionyl Coenzyme A Carboxylase Beta subunit [Source:UniProtKB/TrEMBL;Acc:Q8WQF1]	-
WBGene00016425	329.529	498.797	434.992	213.851	219.076	55.8746	421.106	162.934	1.36812	0.00341373	0.032858	C34H4.2	IV	1553752	1555567	+	1523	protein_coding	-	-
WBGene00020887	768.9	606.981	667.791	265.919	304.39	494.889	681.224	355.066	0.941225	0.00341394	0.032858	hic-1	X	6597918	6598866	-	797	protein_coding	-	-
WBGene00014505	10383	12334.9	13324.3	8443.39	7261.11	4836	12014.1	6846.84	0.811148	0.00344635	0.0331508	T05E11.9	IV	11106418	11107579	+	1162	ncRNA	-	-
WBGene00010722	606.977	494.967	348.735	239.885	256.993	272.531	483.56	256.47	0.915176	0.00344838	0.0331512	K09E4.4	II	14114213	14122165	-	2313	protein_coding	-	-
WBGene00004311	1019.83	1012.91	954.385	1420.71	1545.12	1949.91	995.711	1638.58	-0.718436	0.00345749	0.0332197	ras-2	III	4737589	4740075	-	776	protein_coding	GTP binding protein; R-RAS related [Source:UniProtKB/TrEMBL;Acc:G5EGA7]	-
WBGene00010018	230.102	257.536	201.265	146.906	57.9288	91.2238	229.634	98.6863	1.21579	0.00346051	0.0332296	fbxa-69	V	15814237	15815659	-	1259	protein_coding	F-box A protein [Source:UniProtKB/TrEMBL;Acc:O45561]	-
WBGene00000110	5710.88	5710.79	5316.36	3931.14	3467.3	2268.05	5579.35	3222.16	0.791915	0.00346364	0.0332406	alh-4	V	6427212	6429927	-	2276	protein_coding	Aldehyde dehydrogenase [Source:UniProtKB/TrEMBL;Acc:O16518]	-
WBGene00011514	9.46922	7.65907	5.56493	9.29786	61.0886	61.5761	7.5644	43.9875	-2.53741	0.0034671	0.0332547	fbxa-198	V	15869311	15870636	+	1162	pseudogene	-	-
WBGene00018250	340.892	517.945	551.855	870.28	784.672	859.785	470.231	838.246	-0.833989	0.0034721	0.0332836	F40H3.2	II	6173568	6174863	+	929	protein_coding	-	-
WBGene00008407	312.484	270.94	301.434	507.663	567.702	452.698	294.952	509.355	-0.788317	0.00348359	0.0333614	D2023.3	V	11802105	11811943	-	690	protein_coding	-	-
WBGene00022610	1068.13	811.862	656.661	483.489	526.626	295.337	845.55	435.151	0.957757	0.00348421	0.0333614	ltah-1.2	IV	3609218	3613072	-	1998	protein_coding	LeukoTriene A4 Hydrolase homolog [Source:UniProtKB/TrEMBL;Acc:U4PAP4]	-
WBGene00001623	413.805	347.53	311.636	214.781	203.277	131.134	357.657	183.064	0.964683	0.00350433	0.0335185	glt-5	II	9706483	9708885	-	1787	protein_coding	Amino acid transporter [Source:UniProtKB/TrEMBL;Acc:O18210]	-
WBGene00012063	3.78769	18.1903	10.2024	0	0	0	10.7268	0	5.81254	0.00350473	0.0335185	fbxb-1	V	19240354	19241624	+	1218	protein_coding	F-box B protein [Source:UniProtKB/TrEMBL;Acc:O18134]	-
WBGene00018351	394.866	576.345	466.526	335.653	189.585	134.555	479.246	219.931	1.12169	0.00350663	0.0335185	F42G2.2	II	2422207	2425837	+	1978	protein_coding	-	-
WBGene00013255	989.533	985.148	1052.7	732.672	536.105	494.889	1009.13	587.889	0.778803	0.00351259	0.0335563	tric-1B.1	II	12256950	12269706	-	1710	protein_coding	Trimeric intracellular cation channel type 1B.1 [Source:UniProtKB/Swiss-Prot;Acc:Q9NA75]	-
WBGene00044066	6.62845	57.443	62.1417	10.2277	1.05325	0	42.0711	3.7603	3.45099	0.00351798	0.0335886	fbxb-66	I	13423994	13425148	-	1095	protein_coding	F-box B protein [Source:UniProtKB/TrEMBL;Acc:Q9XWP5]	-
WBGene00011012	21.7792	57.443	95.5312	4.64893	18.9585	0	58.2512	7.86915	2.88544	0.00352551	0.0336102	R04D3.4	X	13287779	13288815	-	818	protein_coding	-	-
WBGene00013382	833.291	903.77	849.579	554.153	561.383	418.489	862.213	511.342	0.753242	0.00352591	0.0336102	gcl-1	IV	13408606	13412895	-	1904	protein_coding	GCL (Drosophila Germ Cell-Less) homolog [Source:UniProtKB/TrEMBL;Acc:Q9U1W5]	-
WBGene00012013	410.964	631.873	537.943	361.687	208.544	119.731	526.927	229.987	1.19411	0.00352628	0.0336102	ugt-54	IV	10761597	10764496	+	1859	protein_coding	UDP-GlucuronosylTransferase [Source:UniProtKB/TrEMBL;Acc:Q22770]	-
WBGene00000169	1189.33	873.134	669.646	438.859	506.614	545.062	910.705	496.845	0.874487	0.00353243	0.0336416	aqp-1	II	7235834	7238349	-	1090	protein_coding	AQuaPorin or aquaglyceroporin related [Source:UniProtKB/TrEMBL;Acc:Q8IG23]	-
WBGene00017979	3825.56	2997.57	2831.62	2228.7	1804.22	1815.35	3218.25	1949.42	0.723092	0.0035336	0.0336416	F32B5.6	I	2668160	2672434	+	3041	protein_coding	-	-
WBGene00015748	370.246	343.701	299.579	208.272	154.828	185.869	337.842	182.99	0.88392	0.00354249	0.0337071	C14A11.2	X	2803112	2804830	+	939	protein_coding	-	-
WBGene00013633	487.665	651.978	544.435	402.598	238.035	200.692	561.359	280.442	0.99963	0.00354578	0.0337192	Y105C5A.8	IV	15612768	15617087	-	865	protein_coding	-	-
WBGene00014103	1.89384	0.957384	0	4.64893	0	85.5223	0.950409	30.0571	-4.98424	0.00354805	0.0337216	best-26	I	14200020	14204687	+	1317	protein_coding	Bestrophin homolog 26 [Source:UniProtKB/Swiss-Prot;Acc:O18304]	-
WBGene00015124	160.03	113.929	127.993	229.657	228.555	375.158	133.984	277.79	-1.05093	0.00355699	0.0337836	anmt-1	III	8684808	8686481	+	978	protein_coding	Nicotinamide N-methyltransferase [Source:UniProtKB/Swiss-Prot;Acc:P34254]	-
WBGene00017378	148.667	271.897	217.96	68.8042	49.5028	133.415	212.841	83.9073	1.34555	0.00355952	0.0337836	F11C7.6	X	17401571	17402581	+	564	protein_coding	-	-
WBGene00010775	27.4607	28.7215	17.6223	56.717	66.3548	99.2059	24.6015	74.0926	-1.58933	0.00356064	0.0337836	poml-1	X	13719207	13722917	-	1050	protein_coding	PON (Paraoxonase) and MEC-6 Like [Source:UniProtKB/TrEMBL;Acc:Q21427]	-
WBGene00010690	32.1953	81.3776	113.153	26.034	15.7988	21.6657	75.5755	21.1661	1.83437	0.00357064	0.0338593	K08H2.3	X	13237389	13238476	+	949	protein_coding	-	-
WBGene00017938	56.8153	39.2527	35.2445	132.959	78.9938	124.292	43.7709	112.082	-1.35709	0.00358099	0.0339382	F31A3.3	X	17532976	17534064	-	781	protein_coding	-	-
WBGene00002143	73.8599	87.1219	191.99	41.8404	28.4378	50.1731	117.657	40.1504	1.55232	0.00360146	0.0341128	inx-21	I	3611909	3618317	+	1689	protein_coding	Innexin [Source:UniProtKB/TrEMBL;Acc:Q9N3R4]	-
WBGene00013250	37.8769	87.1219	144.688	21.3851	24.2248	0	89.8956	15.2033	2.55665	0.00361316	0.0341859	Y57A10A.5	II	12154486	12156812	+	1982	protein_coding	-	-
WBGene00219546	8.5223	10.5312	11.1299	0	0	0	10.0611	0	5.72035	0.00361326	0.0341859	F41E7.20	X	10303745	10304026	+	236	ncRNA	-	-
WBGene00016779	4.73461	14.3608	12.0573	0	0	0	10.3842	0	5.76589	0.00361606	0.0341931	sdz-7	II	3877249	3877974	-	533	protein_coding	SKN-1 Dependent Zygotic transcript [Source:UniProtKB/TrEMBL;Acc:Q95X89]	-
WBGene00018448	53.9745	104.355	96.4587	219.43	221.183	143.678	84.9294	194.763	-1.19817	0.00363703	0.0343719	F45D11.1	II	1021505	1023528	+	1670	pseudogene	-	-
WBGene00021932	308.696	232.644	276.391	423.983	455.004	616.901	272.577	498.629	-0.870664	0.00365003	0.0344753	cox-18	IV	1097453	1102980	+	1073	protein_coding	Cytochrome OXidase assembly protein [Source:UniProtKB/TrEMBL;Acc:Q9N356]	-
WBGene00001309	614.552	734.313	986.847	1017.19	1608.31	1761.76	778.571	1462.42	-0.909148	0.00365533	0.0345058	emr-1	I	1842445	1843227	+	657	protein_coding	Emerin homolog 1 [Source:UniProtKB/Swiss-Prot;Acc:O01971]	-
WBGene00000448	488.612	309.235	393.255	722.444	603.513	835.838	397.034	720.598	-0.859749	0.00365929	0.0345237	pros-1	III	8067289	8071455	+	2264	protein_coding	Homeobox protein prospero homolog 1 [Source:UniProtKB/Swiss-Prot;Acc:P34522]	HPD
WBGene00015285	970.595	954.512	707.673	1597.37	1356.59	1434.49	877.593	1462.82	-0.737274	0.00367835	0.034672	gmeb-1	II	19538	22169	+	1452	protein_coding	GMEB (Glucocorticoid Modulatory Element Binding protein) transcriptional regulator homolog [Source:UniProtKB/TrEMBL;Acc:O17208]	SAND
WBGene00019663	1108.85	783.14	867.201	1535.08	1432.42	1618.08	919.729	1528.53	-0.732826	0.00367916	0.034672	K11H12.7	IV	665525	666917	+	694	protein_coding	-	-
WBGene00006430	178.021	184.775	156.745	303.11	277.005	388.842	173.181	322.986	-0.898739	0.00369707	0.0348212	tag-51	III	854219	856535	+	1668	protein_coding	-	-
WBGene00044614	205.482	299.661	301.434	123.662	167.467	88.9432	268.859	126.691	1.08472	0.00370308	0.0348582	C36B1.14	I	8730156	8730922	+	462	protein_coding	-	-
WBGene00010257	10.4161	7.65907	12.0573	0	0	0	10.0442	0	5.71805	0.00371266	0.0349287	F58E6.8	V	9755076	9755808	-	687	protein_coding	-	-
WBGene00021503	1657.11	881.751	788.365	628.536	607.726	362.615	1109.08	532.959	1.05678	0.0037266	0.0350304	ctsa-2	III	6612516	6615134	+	1644	protein_coding	Carboxypeptidase [Source:UniProtKB/TrEMBL;Acc:O76725]	-
WBGene00000378	7608.52	8737.09	8078.42	12156	12593.7	12477.1	8141.34	12409	-0.608043	0.00372767	0.0350304	cct-2	II	8927741	8929820	+	1931	protein_coding	T-complex protein 1 subunit beta [Source:UniProtKB/Swiss-Prot;Acc:P47207]	-
WBGene00022152	586.145	572.516	552.783	834.948	1030.08	923.641	570.481	929.556	-0.704229	0.00375095	0.0352294	atg-5	I	1709587	1715568	+	1037	protein_coding	Autophagy protein 5 [Source:UniProtKB/TrEMBL;Acc:W6RR39]	-
WBGene00020693	220.633	189.562	211.467	309.619	352.839	542.782	207.221	401.747	-0.954166	0.00375309	0.0352297	lron-8	I	5768919	5773627	+	1764	protein_coding	ELRR (Extracellular Leucine-Rich Repeat) ONly [Source:UniProtKB/TrEMBL;Acc:Q86S81]	-
WBGene00001945	3608.72	3878.36	3505.9	2297.5	2190.76	2579.35	3664.33	2355.87	0.637347	0.00375619	0.035239	his-71	X	7981382	7982070	-	591	protein_coding	Histone H3.3 type 1 [Source:UniProtKB/Swiss-Prot;Acc:Q10453]	-
WBGene00020722	563.418	705.592	593.592	312.408	394.969	125.433	620.867	277.603	1.16031	0.00376289	0.0352821	T23B12.8	V	8470013	8471244	-	636	protein_coding	Glycoprotein hormone beta 5 [Source:UniProtKB/TrEMBL;Acc:G5EEJ3]	-
WBGene00017397	82.3822	74.6759	78.8365	117.153	188.532	216.657	78.6315	174.114	-1.14526	0.00376937	0.035323	F12A10.8	II	5498851	5501409	-	2065	protein_coding	-	-
WBGene00018829	13.2569	38.2954	34.317	6.50851	0	0	28.6231	2.1695	3.66989	0.00377908	0.0353796	F54E7.6	III	5659889	5661085	-	783	protein_coding	-	-
WBGene00015064	1535.91	1662.02	1524.79	2260.31	2336.11	3156.34	1574.24	2584.26	-0.714956	0.00377964	0.0353796	B0228.7	II	7757190	7758922	-	1437	protein_coding	S-methyl-5'-thioadenosine phosphorylase [Source:UniProtKB/Swiss-Prot;Acc:Q09438]	-
WBGene00003952	1583.25	1871.69	2030.27	2581.09	2902.76	3586.24	1828.4	3023.36	-0.725438	0.00378188	0.0353808	pbs-6	III	8243122	8244092	-	878	protein_coding	Proteasome subunit beta type-1 [Source:UniProtKB/Swiss-Prot;Acc:P34286]	-
WBGene00022712	774.582	691.231	648.314	500.225	322.295	368.316	704.709	396.945	0.827287	0.00379433	0.0354774	ZK355.2	II	2923899	2926533	+	1627	protein_coding	-	-
WBGene00009698	19.8854	66.0595	104.806	13.9468	14.7455	0	63.5837	9.5641	2.72272	0.00381897	0.0356852	F44F1.6	I	13260933	13262727	-	1738	protein_coding	-	-
WBGene00007048	1493.3	1740.52	1910.62	1175.25	1029.03	652.25	1714.81	952.176	0.848305	0.00382139	0.0356852	nfx-1	III	6375379	6379190	+	3553	protein_coding	Transcriptional repressor NF-X1 homolog [Source:UniProtKB/Swiss-Prot;Acc:Q18034]	zf-NF-X1
WBGene00020909	1112.63	1199.6	1284.57	883.297	580.341	624.883	1198.94	696.174	0.783698	0.00382295	0.0356852	W01A11.1	V	6499224	6502428	+	1422	protein_coding	Epoxide hydrolase [Source:UniProtKB/TrEMBL;Acc:Q23068]	-
WBGene00003171	7622.72	11006.1	9934.32	16508.4	15540.7	14278.8	9521.04	15442.6	-0.697739	0.00383367	0.0357653	mec-7	X	7774859	7776689	-	1561	protein_coding	Tubulin beta-1 chain [Source:UniProtKB/Swiss-Prot;Acc:P12456]	-
WBGene00017989	715.873	984.191	1023.02	1345.4	1565.13	1696.76	907.694	1535.77	-0.758508	0.00385175	0.0359139	nol-10	IV	7580597	7583726	+	2487	protein_coding	NucleOLar protein [Source:UniProtKB/TrEMBL;Acc:Q19974]	-
WBGene00020208	1991.38	2365.7	2107.25	1628.99	858.4	496.03	2154.77	994.472	1.11498	0.00385643	0.0359375	T04C4.1	IV	2222828	2235795	+	4284	protein_coding	-	-
WBGene00020765	303.015	353.275	302.361	658.289	710.944	411.647	319.55	593.627	-0.894035	0.0038609	0.0359591	T24C12.3	X	2196525	2203961	-	2157	protein_coding	-	-
WBGene00020339	398.654	517.945	541.653	309.619	200.118	275.952	486.084	261.896	0.891758	0.00386462	0.0359737	ttr-59	X	7329818	7330669	+	764	protein_coding	TransThyretin-Related family domain [Source:UniProtKB/TrEMBL;Acc:Q8MPX6]	-
WBGene00020268	2697.78	2432.71	2609.02	3380.7	4301.48	4963.72	2579.84	4215.3	-0.708246	0.0038679	0.0359842	hpo-19	V	6436578	6437884	+	1100	protein_coding	NADH-cytochrome b5 reductase [Source:UniProtKB/TrEMBL;Acc:O16521]	-
WBGene00021661	141.091	271.897	285.666	103.206	109.538	23.9463	232.885	78.8969	1.55881	0.0038807	0.0360832	mbtr-1	I	343069	348424	-	2285	protein_coding	Malignant brain tumor repeat protein 1 [Source:UniProtKB/Swiss-Prot;Acc:A0SQM0]	-
WBGene00004219	233.89	359.019	392.327	226.868	71.6211	57.0149	328.412	118.501	1.46724	0.00389094	0.0361583	ptr-4	X	6060754	6065986	-	3125	protein_coding	PaTched Related family [Source:UniProtKB/TrEMBL;Acc:Q95YD0]	-
WBGene00016033	1881.53	1360.44	1524.79	2318.89	2291.87	4619.35	1588.92	3076.7	-0.953187	0.00390751	0.0362793	C24A3.2	X	8997479	8998909	+	966	protein_coding	-	-
WBGene00169197	99.4268	70.8464	86.2564	154.345	182.212	193.851	85.5098	176.803	-1.04715	0.00390953	0.0362793	21ur-10296	IV	14896338	14896358	+	21	piRNA	-	-
WBGene00201301	22.7261	31.5937	20.4047	5.57872	0	0	24.9082	1.85957	3.68549	0.00391327	0.0362793	C10F3.15	V	6000346	6000492	-	147	ncRNA	-	-
WBGene00015182	156.242	98.6105	150.253	54.8574	50.556	69.5582	135.035	58.3239	1.21281	0.0039139	0.0362793	B0416.7	X	9296947	9297934	-	475	protein_coding	-	-
WBGene00007785	229.155	261.366	362.648	158.064	142.189	55.8746	284.39	118.709	1.258	0.00391482	0.0362793	tofu-1	V	9981249	9982766	+	1365	protein_coding	Twenty One u-rna (21U-RNA) biogenesis Fouled Up [Source:UniProtKB/TrEMBL;Acc:O17608]	-
WBGene00045433	418.539	480.607	490.641	1072.97	1231.25	505.152	463.262	936.459	-1.01571	0.00391809	0.0362815	F49D11.10	I	10926883	10933705	-	2392	protein_coding	-	-
WBGene00010285	24.62	39.2527	56.5767	10.2277	8.42601	9.12238	40.1498	9.25868	2.11506	0.00392064	0.0362815	F58H1.2	V	11929073	11929993	+	720	protein_coding	-	-
WBGene00012564	71.966	55.5283	35.2445	5.57872	16.852	18.2448	54.2463	13.5585	2.00989	0.0039223	0.0362815	fbxa-107	V	18123939	18125245	+	1071	protein_coding	F-box A protein [Source:UniProtKB/TrEMBL;Acc:Q9U2P1]	-
WBGene00013728	108.896	202.008	325.548	14.8766	25.278	123.152	212.151	54.4356	1.96771	0.00392373	0.0362815	Y111B2A.2	III	12496086	12496449	+	319	protein_coding	-	-
WBGene00007092	158.136	241.261	332.968	97.6276	107.432	131.134	244.122	112.064	1.12458	0.00392706	0.0362825	B0001.7	IV	12151170	12154245	-	2415	protein_coding	-	-
WBGene00022657	67.2314	8.61646	11.1299	33.4723	64.2483	408.227	28.9926	168.649	-2.53924	0.00392818	0.0362825	ZK105.6	V	7722837	7724065	-	866	protein_coding	-	-
WBGene00001600	122.153	179.988	256.914	90.1893	72.6743	17.1045	186.352	59.9894	1.63115	0.00393448	0.0363206	glh-3	I	5792324	5795114	-	2493	protein_coding	ATP-dependent RNA helicase glh-3 [Source:UniProtKB/Swiss-Prot;Acc:O01836]	-
WBGene00016412	808.671	775.481	776.307	1200.35	1331.31	1196.17	786.82	1242.61	-0.659263	0.00393911	0.0363433	mrps-26	III	5234617	5236364	+	1084	protein_coding	Mitochondrial Ribosomal Protein, Small [Source:UniProtKB/TrEMBL;Acc:Q95QS3]	-
WBGene00019097	3190.18	3288.61	3081.11	1966.5	2283.45	1872.37	3186.64	2040.77	0.642897	0.00394931	0.0364173	F59B1.2	V	3633341	3634683	+	637	protein_coding	-	-
WBGene00013796	3.78769	21.0624	28.7521	1.85957	0	0	17.8674	0.619858	4.76079	0.00395327	0.0364337	Y116A8C.19	IV	17038923	17039667	-	745	protein_coding	-	zf-CCCH
WBGene00017535	18.9384	57.443	54.7218	12.0872	0	0	43.7011	4.02907	3.40454	0.00395649	0.0364433	atf-8	V	6105607	6107530	+	987	protein_coding	ATF (cAMP-dependent transcription factor) family [Source:UniProtKB/TrEMBL;Acc:O16213]	TF_bZIP
WBGene00008727	17.9915	42.1249	46.3744	9.29786	0	0	35.4969	3.09929	3.47587	0.00395901	0.0364465	F13A7.12	V	16396359	16398502	+	1004	protein_coding	-	-
WBGene00002094	134.463	61.2726	89.9663	7.43829	3.15975	46.7522	95.2339	19.1168	2.32702	0.00396689	0.0364989	ins-11	II	5556761	5557088	+	276	protein_coding	Probable insulin-like peptide gamma-type 1 B-chain-like peptide A-chain-like peptide [Source:UniProtKB/Swiss-Prot;Acc:Q18060]	-
WBGene00003373	387.291	584.004	807.842	307.759	349.679	218.937	593.046	292.125	1.02111	0.00397859	0.0365864	mlh-1	III	13509301	13514570	-	2334	protein_coding	MLH (MutL Homolog) family [Source:UniProtKB/TrEMBL;Acc:Q9XU10]	-
WBGene00008492	746.174	175.201	187.353	118.083	143.242	127.713	369.576	129.679	1.51107	0.00398566	0.0366204	F01D5.1	II	13996958	13997606	-	589	protein_coding	-	-
WBGene00020022	1092.75	1026.32	1223.36	2481.6	2850.1	1197.31	1114.14	2176.34	-0.966112	0.00398667	0.0366204	gldc-1	II	6050332	6054307	+	3128	protein_coding	Glycine cleavage system P protein [Source:UniProtKB/TrEMBL;Acc:Q21962]	-
WBGene00009288	931.771	1032.06	1103.71	661.078	671.974	488.047	1022.51	607.033	0.751839	0.0040142	0.036853	F31C3.6	I	15053617	15059003	-	2081	protein_coding	-	-
WBGene00022669	59.6561	84.2498	156.745	39.9808	6.31951	0	100.217	15.4334	2.68579	0.00402046	0.036886	ZK177.1	II	5528141	5529637	+	1372	protein_coding	-	-
WBGene00004775	420.433	699.848	783.727	384.932	315.975	136.836	634.669	279.248	1.18321	0.00402221	0.036886	2023-09-01	I	3433157	3438543	-	3942	protein_coding	Separin homolog sep-1 [Source:UniProtKB/Swiss-Prot;Acc:G5ED39]	-
WBGene00020404	97.5329	87.1219	114.081	56.717	21.065	23.9463	99.5786	33.9094	1.54722	0.00402925	0.0369001	T10B11.8	I	6951900	6954252	-	1776	protein_coding	-	-
WBGene00017422	356.043	348.488	381.197	239.885	184.319	176.746	361.909	200.317	0.852086	0.00402971	0.0369001	F13C5.1	X	602172	604922	+	873	protein_coding	-	-
WBGene00019243	25.5669	43.0823	42.6644	3.71915	11.5858	0	37.1045	5.10164	2.85668	0.00403036	0.0369001	fbxb-72	V	722695	723827	-	1088	protein_coding	F-box B protein [Source:UniProtKB/TrEMBL;Acc:Q9N5K6]	-
WBGene00018645	126.888	42.1249	74.199	19.5255	27.3845	28.5074	81.0705	25.1392	1.69218	0.00403812	0.0369189	F49F1.5	IV	4119460	4120399	-	534	protein_coding	-	-
WBGene00020720	54.9215	79.4629	82.5464	30.683	22.1183	22.806	72.3102	25.2024	1.51756	0.0040384	0.0369189	T23B12.5	V	8446608	8448009	-	869	protein_coding	-	-
WBGene00004468	853.176	940.151	1249.33	1473.71	1638.86	2271.47	1014.22	1794.68	-0.823112	0.00403904	0.0369189	rpn-12	II	11653096	11654194	+	885	protein_coding	26S proteasome non-ATPase regulatory subunit 8 [Source:UniProtKB/Swiss-Prot;Acc:Q23449]	-
WBGene00001164	2.84077	10.5312	18.5498	0	0	0	10.6406	0	5.80143	0.00404459	0.0369494	efn-3	X	13475964	13477456	-	786	protein_coding	Eph(F)riN [Source:UniProtKB/TrEMBL;Acc:Q19475]	-
WBGene00013083	180.862	79.4629	118.718	203.623	286.484	370.597	126.348	286.901	-1.18222	0.00404974	0.0369533	Y51A2D.18	V	18481131	18487258	-	1876	protein_coding	-	-
WBGene00045246	70.0722	85.2072	91.8213	140.398	159.041	239.463	82.3669	179.634	-1.12343	0.00404979	0.0369533	C29E4.15	III	7952623	7955816	+	708	protein_coding	-	-
WBGene00000420	953.55	951.64	1095.36	734.531	510.827	483.486	1000.18	576.281	0.79472	0.00405164	0.0369533	ced-6	III	5595771	5598066	+	1694	protein_coding	Cell death protein 6 [Source:UniProtKB/Swiss-Prot;Acc:O76337]	-
WBGene00005228	102.268	115.843	85.3289	36.2617	22.1183	0	101.147	19.46	2.36854	0.00405397	0.0369544	srh-2	V	728312	734279	+	1261	protein_coding	Serpentine Receptor, class H [Source:UniProtKB/TrEMBL;Acc:H2KYH0]	-
WBGene00019498	259.457	253.707	254.132	344.021	452.898	710.406	255.765	502.441	-0.973262	0.00408335	0.0372019	K07E8.7	II	641010	650367	-	1370	protein_coding	Pseudouridine synthase [Source:UniProtKB/TrEMBL;Acc:A0A0M9JJ73]	-
WBGene00044650	2120.16	2446.12	2610.88	1604.81	1180.69	429.892	2392.38	1071.8	1.15798	0.00409834	0.037308	Y71G10AR.4	IV	2199041	2209051	+	1836	protein_coding	-	-
WBGene00045345	1.89384	2.87215	0.927488	13.017	8.42601	41.0507	1.89783	20.8312	-3.45571	0.00409946	0.037308	Y43F8C.24	V	19711999	19712872	-	555	pseudogene	-	-
WBGene00011434	366.459	713.251	844.014	344.021	271.739	334.107	641.241	316.622	1.01805	0.004107	0.0373534	T04D3.5	I	13329175	13330998	-	1283	protein_coding	-	-
WBGene00018175	231.996	271.897	208.685	427.702	354.946	511.994	237.526	431.547	-0.861253	0.00410892	0.0373534	F38B6.6	X	6684440	6690085	-	2208	protein_coding	Protein O-mannosyl-transferase TMTC1 [Source:UniProtKB/Swiss-Prot;Acc:Q20144]	-
WBGene00017054	321.006	374.337	328.331	226.868	169.573	110.609	341.225	169.017	1.01128	0.00412249	0.0374564	gstk-2	IV	7240445	7242270	-	758	protein_coding	Glutathione s-transferase kappa 2 [Source:UniProtKB/Swiss-Prot;Acc:Q18973]	-
WBGene00009118	513.232	489.223	523.103	707.567	866.826	973.814	508.519	849.402	-0.73973	0.00413003	0.0375045	F25H2.4	I	10551972	10553035	+	708	protein_coding	-	-
WBGene00012499	17.9915	42.1249	59.3592	3.71915	4.213	13.6836	39.8252	7.20524	2.48226	0.00415602	0.0377201	Y24F12A.4	IV	11616121	11617984	-	1280	pseudogene	-	-
WBGene00018473	179.915	155.096	203.12	333.793	313.869	320.424	179.377	322.695	-0.847128	0.00418183	0.0379337	cima-1	IV	7651442	7654295	+	1845	protein_coding	-	-
WBGene00007130	1243.31	1606.49	1691.74	1090.64	738.329	421.91	1513.85	750.293	1.01203	0.00419181	0.0380036	B0272.4	X	9428431	9430424	+	969	protein_coding	-	-
WBGene00017443	58.7091	70.8464	41.7369	172.94	155.881	90.0835	57.0975	139.635	-1.29205	0.00419419	0.0380046	F13H8.11	II	6257628	6260021	-	1719	protein_coding	-	-
WBGene00045509	63.4438	92.8662	102.951	19.5255	32.6508	39.9104	86.4204	30.6956	1.4988	0.00420349	0.0380682	T07D10.8	I	12596530	12598916	-	1975	pseudogene	-	-
WBGene00004476	56768.9	51965.8	48542.9	66615.5	85770.4	114788	52425.9	89058	-0.764461	0.00421233	0.0381276	rps-7	I	10330879	10331808	+	705	protein_coding	40S ribosomal protein S7 [Source:UniProtKB/Swiss-Prot;Acc:Q23312]	-
WBGene00002090	8.5223	5.7443	15.7673	0	0	0	10.0113	0	5.71354	0.00422671	0.0382371	ins-7	IV	9682013	9682826	-	401	protein_coding	Probable insulin-like peptide beta-type 4 [Source:UniProtKB/Swiss-Prot;Acc:Q23430]	-
WBGene00219905	5.68153	18.1903	14.8398	0.929786	0	0	12.9039	0.309929	5.1175	0.00423028	0.0382487	F19F10.13	V	7567999	7568131	+	133	ncRNA	-	-
WBGene00001862	93.7452	130.204	250.422	67.8744	14.7455	62.7164	158.124	48.4454	1.70586	0.00423558	0.038276	him-3	IV	6977517	6978943	+	1168	protein_coding	High Incidence of Males (Increased X chromosome loss); Meiotic chromosome core protein [Source:UniProtKB/TrEMBL;Acc:G5EBG0]	-
WBGene00002065	20116.4	19930.8	20005	31679.7	32376.9	27329.5	20017.4	30462	-0.605765	0.00424477	0.0383382	iff-2	II	8559394	8561352	-	979	protein_coding	Eukaryotic translation initiation factor 5A-2 [Source:UniProtKB/Swiss-Prot;Acc:Q20751]	-
WBGene00006473	185.597	126.375	161.383	270.568	264.366	393.403	157.785	309.446	-0.970894	0.00424902	0.0383559	tag-124	II	9591292	9592936	+	1405	protein_coding	Probable tRNA pseudouridine synthase tag-124 [Source:UniProtKB/Swiss-Prot;Acc:Q09524]	-
WBGene00004174	345.626	481.564	575.97	323.566	107.432	177.886	467.72	202.961	1.20293	0.00425571	0.0383956	abu-14	II	9225186	9227261	-	1452	protein_coding	Activated in Blocked Unfolded protein response [Source:UniProtKB/TrEMBL;Acc:Q23390]	-
WBGene00012299	40.7176	173.286	173.44	42.7702	34.7573	45.6119	129.148	41.0465	1.65395	0.00425863	0.0384012	W06D11.1	X	12293767	12295311	+	711	protein_coding	-	-
WBGene00019973	84.276	111.057	95.5312	168.291	193.798	220.077	96.9546	194.056	-1.00038	0.00428904	0.0386546	R09A1.3	V	1023782	1027073	-	1022	protein_coding	-	-
WBGene00010812	278.395	272.854	234.654	348.67	468.697	741.194	261.968	519.52	-0.986998	0.00430596	0.038769	mrpl-35	III	3510237	3511011	+	575	protein_coding	Probable 39S ribosomal protein L35, mitochondrial [Source:UniProtKB/Swiss-Prot;Acc:Q21454]	-
WBGene00003721	343.733	444.226	433.137	218.5	266.473	143.678	407.032	209.55	0.956946	0.00430637	0.038769	nhr-131	V	494499	497287	+	1423	protein_coding	Nuclear Hormone Receptor family [Source:UniProtKB/TrEMBL;Acc:A0A0K3AV42]	Miscellaneous
WBGene00015800	1101.27	1384.38	1359.7	782.88	678.294	202.973	1281.78	554.716	1.20762	0.00431111	0.0387907	C15H9.4	X	6101158	6105526	+	1619	protein_coding	-	-
WBGene00017924	364.565	371.465	283.811	424.912	640.377	992.059	339.947	685.783	-1.01184	0.00431861	0.0388372	mrps-21	IV	4659049	4659517	-	416	protein_coding	Mitochondrial Ribosomal Protein, Small [Source:UniProtKB/TrEMBL;Acc:Q9GYI2]	-
WBGene00011032	758.484	858.773	806.914	1336.1	1428.21	1133.46	808.057	1299.26	-0.685296	0.00434639	0.0390661	ddx-52	I	8598658	8600923	+	1936	protein_coding	DEAD boX helicase homolog [Source:UniProtKB/TrEMBL;Acc:Q21736]	-
WBGene00010643	72.913	32.5511	30.6071	85.5404	103.219	213.236	45.357	133.998	-1.56133	0.00435028	0.0390801	K07G5.4	I	7166932	7168783	-	1158	protein_coding	-	-
WBGene00020867	471.567	414.547	390.472	752.197	691.986	660.232	425.529	701.472	-0.721371	0.00435554	0.0391063	shc-2	II	4969186	4988934	+	2985	protein_coding	SHC (Src Homology domain C-terminal) adaptor homolog [Source:UniProtKB/TrEMBL;Acc:H2L091]	-
WBGene00006651	991.427	1752.01	1679.68	882.367	610.886	893.993	1474.37	795.749	0.889696	0.00435843	0.0391112	tts-2	II	10201125	10202230	-	882	ncRNA	-	-
WBGene00002980	22015	23116	21896.1	15959.8	13149.8	14784	22342.4	14631.2	0.610724	0.0043671	0.039168	lgg-1	II	6346960	6347719	-	708	protein_coding	-	-
WBGene00021913	335.21	431.78	436.847	589.485	706.731	770.841	401.279	689.019	-0.77955	0.00437388	0.0392078	cec-8	III	429300	431750	+	2247	protein_coding	C.Elegans Chromodomain protein [Source:UniProtKB/TrEMBL;Acc:Q95XW8]	-
WBGene00013605	318.166	321.681	356.155	444.438	627.738	696.722	332.001	589.632	-0.827964	0.00438382	0.0392691	Y95D11A.1	I	10944210	10945690	+	556	protein_coding	-	-
WBGene00195063	200.747	239.346	148.398	274.287	346.52	689.88	196.164	436.896	-1.15447	0.00438542	0.0392691	coa-1	IV	205239	208049	+	541	protein_coding	Cytochrome Oxidase Assembly subunits [Source:UniProtKB/TrEMBL;Acc:U4PE35]	-
WBGene00044324	544.48	629.001	904.301	1000.45	1219.66	1600.98	692.594	1273.7	-0.878602	0.00439458	0.0393301	ufm-1	III	7858979	7859512	+	464	protein_coding	Ubiquitin-fold modifier 1 [Source:UniProtKB/Swiss-Prot;Acc:P34661]	-
WBGene00017321	331.423	316.894	367.285	531.838	538.211	637.426	338.534	569.159	-0.749148	0.00440644	0.0394151	F09G8.7	III	8267921	8268355	-	330	protein_coding	-	-
WBGene00023423	36.9299	141.693	93.6763	32.5425	22.1183	28.5074	90.7663	27.7227	1.70975	0.00441102	0.039435	F43C1.7	III	4241477	4242593	-	510	protein_coding	-	-
WBGene00044514	192.225	128.289	140.051	30.683	43.1833	96.9253	153.522	56.9305	1.43645	0.00442533	0.0395417	R09E12.9	V	777571	778235	+	479	protein_coding	-	-
WBGene00000638	68.1784	28.7215	61.2142	4.64893	18.9585	0	52.7047	7.86915	2.74091	0.00444245	0.0396735	col-62	I	7403291	7404374	-	1023	protein_coding	COLlagen [Source:UniProtKB/TrEMBL;Acc:Q93207]	-
WBGene00009915	1662.79	1809.46	2370.66	3168.71	3027.04	3266.95	1947.64	3154.24	-0.695529	0.00445156	0.0397336	F52A8.1	I	7317646	7318337	+	623	protein_coding	-	-
WBGene00020216	3379.56	3635.19	3611.64	4500.17	6048.82	6731.18	3542.13	5760.05	-0.701386	0.00445501	0.0397433	trap-2	X	767023	768069	-	819	protein_coding	Translocon-associated protein subunit beta [Source:UniProtKB/Swiss-Prot;Acc:Q22169]	-
WBGene00004386	607.924	761.12	837.521	1102.73	1113.29	1657.99	735.522	1291.34	-0.811726	0.00446994	0.0398412	rnp-3	IV	4174089	4176279	+	778	protein_coding	RNP (RRM RNA binding domain) containing [Source:UniProtKB/TrEMBL;Acc:U4PBX2]	-
WBGene00044588	48.293	62.23	39.882	116.223	84.2601	177.886	50.135	126.123	-1.3302	0.00447181	0.0398412	ZK1236.9	III	8432469	8435174	-	800	protein_coding	-	-
WBGene00022830	572.888	806.117	1080.52	414.685	490.815	433.313	819.843	446.271	0.877579	0.00447314	0.0398412	ZK973.1	I	4382565	4385218	+	2359	protein_coding	-	-
WBGene00013236	2709.14	2461.43	2275.13	1070.18	1628.33	1688.78	2481.9	1462.43	0.763366	0.00447553	0.0398413	Y56A3A.18	III	11917836	11918719	-	503	protein_coding	Zinc finger protein 593 homolog [Source:UniProtKB/Swiss-Prot;Acc:Q9U239]	-
WBGene00015515	430.849	500.712	529.595	836.808	970.044	679.617	487.052	828.823	-0.767149	0.00448555	0.0399092	spdl-1	II	7781566	7783354	+	1602	protein_coding	Spindly-like protein spdl-1 [Source:UniProtKB/Swiss-Prot;Acc:Q17695]	-
WBGene00003216	50.1868	115.843	168.803	15.8064	14.7455	59.2955	111.611	29.9491	1.90489	0.0045131	0.0401169	memi-1	IV	4758982	4760428	-	1300	protein_coding	MEiosis-to-MItosis transition associated [Source:UniProtKB/TrEMBL;Acc:Q9N575]	-
WBGene00003924	2836.03	3609.34	3937.19	4713.09	5384.22	8441.62	3460.85	6179.64	-0.836316	0.00451369	0.0401169	pas-3	I	5105110	5106204	-	1049	protein_coding	Proteasome subunit alpha type-4 [Source:UniProtKB/Swiss-Prot;Acc:Q9N599]	-
WBGene00012860	1575.68	2182.84	2008.94	1293.33	1082.74	513.134	1922.48	963.07	0.996792	0.00452235	0.0401725	acdh-11	III	10566181	10571606	+	2016	protein_coding	Acyl-CoA dehydrogenase family member 11 [Source:UniProtKB/Swiss-Prot;Acc:Q9XWZ2]	-
WBGene00021658	119.312	214.454	278.246	52.068	54.7691	126.573	204.004	77.8034	1.3941	0.0045273	0.0401951	Y48G1A.2	I	347469	348357	+	728	protein_coding	-	-
WBGene00020808	22816.1	18912.2	19005.2	26420.8	33531.3	38619.6	20244.5	32857.2	-0.698671	0.00453432	0.0402361	clik-1	V	6765560	6768732	-	1745	protein_coding	CaLponIn-liKe proteins [Source:UniProtKB/TrEMBL;Acc:H2L0M6]	-
WBGene00016331	2442.11	2764.92	2750	1854.92	1716.8	1498.35	2652.35	1690.02	0.650061	0.0045385	0.0402486	obr-4	I	5829072	5834640	+	2724	protein_coding	Oxysterol-binding protein [Source:UniProtKB/TrEMBL;Acc:O01686]	-
WBGene00022256	10.4161	13.4034	5.56493	0	0	0	9.79481	0	5.6813	0.00454054	0.0402486	Y73B6BL.37	IV	6487347	6489090	+	1134	protein_coding	-	-
WBGene00013497	213.057	193.392	211.467	99.4871	73.7276	128.854	205.972	100.689	1.0338	0.00455074	0.0403176	hex-5	X	14901881	14905261	-	1751	protein_coding	Hexosaminidase [Source:UniProtKB/TrEMBL;Acc:G5EEC8]	-
WBGene00004151	116.471	104.355	90.8938	206.413	149.562	329.546	103.907	228.507	-1.13611	0.00456663	0.040437	pqn-68	V	12952636	12953208	+	475	protein_coding	D-aminoacyl-tRNA deacylase [Source:UniProtKB/TrEMBL;Acc:Q9XUP4]	-
WBGene00022046	4450.53	3347.97	3406.66	4688.91	7050.46	7486.05	3735.06	6408.48	-0.778788	0.00457986	0.0405326	Y66H1A.4	IV	425972	427204	+	1185	protein_coding	Probable H/ACA ribonucleoprotein complex subunit 1-like protein [Source:UniProtKB/Swiss-Prot;Acc:Q9TYK1]	-
WBGene00015623	377.822	320.724	313.491	116.223	193.798	208.674	337.345	172.899	0.966198	0.00459546	0.0406492	C09B8.4	X	6018442	6019936	-	912	protein_coding	-	-
WBGene00015949	629.703	702.72	722.513	293.813	493.975	151.66	684.979	313.149	1.12872	0.00460042	0.0406648	C18A11.3	X	8061123	8065688	+	909	protein_coding	-	-
WBGene00013258	297.333	350.403	386.762	208.272	203.277	129.994	344.833	180.515	0.932374	0.00460416	0.0406648	polg-1	II	12189795	12199959	-	3301	protein_coding	POLG (Mitochondrial DNA POLymerase Gamma) [Source:UniProtKB/TrEMBL;Acc:Q9U208]	-
WBGene00005451	0	0	0	3.71915	4.213	22.806	0	10.246	-5.87898	0.0046066	0.0406648	srh-245	V	654727	655923	-	993	protein_coding	Serpentine Receptor, class H [Source:UniProtKB/TrEMBL;Acc:O17126]	-
WBGene00013136	755.643	641.447	648.314	352.389	414.981	453.839	681.802	407.069	0.744696	0.00460696	0.0406648	Y53C10A.5	I	11998781	12002643	+	1240	protein_coding	-	-
WBGene00001482	57.7622	64.1447	131.703	14.8766	21.065	41.0507	84.5367	25.6641	1.72706	0.00462972	0.0408442	fog-2	V	20199262	20200640	+	1151	protein_coding	Feminization Of Germline [Source:UniProtKB/TrEMBL;Acc:Q2YS43]	-
WBGene00009041	327.635	492.095	662.226	263.13	60.0353	240.603	493.985	187.923	1.394	0.00463252	0.0408473	cut-3	II	8445168	8446831	-	1273	protein_coding	CUTiclin [Source:UniProtKB/TrEMBL;Acc:Q19707]	-
WBGene00002855	5440.06	6044.92	5707.76	4197.06	3603.17	2811.97	5730.92	3537.4	0.695947	0.00464677	0.0409513	let-721	III	6444693	6446943	-	2015	protein_coding	Electron transfer flavoprotein-ubiquinone oxidoreductase, mitochondrial [Source:UniProtKB/Swiss-Prot;Acc:Q11190]	-
WBGene00017798	125.941	121.588	150.253	241.744	208.544	326.125	132.594	258.804	-0.964007	0.00466818	0.0411184	slc-17.8	V	8539728	8545566	-	2052	protein_coding	SLC (SoLute Carrier) homolog [Source:UniProtKB/TrEMBL;Acc:Q6A592]	-
WBGene00004460	3474.26	3694.54	4276.65	6004.56	5613.83	6013.93	3815.15	5877.44	-0.623441	0.00467505	0.0411572	rpn-3	III	8447353	8449346	+	1856	protein_coding	26S proteasome non-ATPase regulatory subunit 3 [Source:UniProtKB/Swiss-Prot;Acc:Q04908]	-
WBGene00012803	3257.41	3636.14	3894.52	6078.94	6114.12	4820.04	3596.03	5671.03	-0.657252	0.00469596	0.0413195	Y43F4B.5	III	13299378	13302760	+	1917	protein_coding	-	-
WBGene00003686	253.775	265.195	297.724	145.976	144.295	160.782	272.231	150.351	0.857004	0.00471509	0.041466	nhr-96	V	2233482	2235138	+	1209	protein_coding	Nuclear hormone receptor family member nhr-96 [Source:UniProtKB/Swiss-Prot;Acc:Q95X91]	Miscellaneous
WBGene00010479	872.115	867.39	892.243	211.991	394.969	644.268	877.249	417.076	1.07387	0.00472907	0.041567	K01G5.8	III	10740280	10740772	-	411	protein_coding	-	-
WBGene00010403	75.7537	97.6532	72.344	32.5425	12.639	0	81.917	15.0605	2.4304	0.00473976	0.0416392	otpl-8	X	12266912	12270941	-	2048	protein_coding	OToPetrin-Like [Source:UniProtKB/TrEMBL;Acc:G5EDX5]	-
WBGene00007087	328.582	348.488	460.034	195.255	225.396	212.095	379.034	210.915	0.8461	0.00474406	0.041655	B0001.2	IV	12146486	12150975	-	2916	protein_coding	-	-
WBGene00015350	3318.96	3173.73	2917.88	2353.29	1807.38	1378.62	3136.85	1846.43	0.764301	0.00476038	0.0417471	fbxl-1	III	8227362	8232660	+	2865	protein_coding	Uncharacterized F-box/LRR-repeat protein C02F5.7 [Source:UniProtKB/Swiss-Prot;Acc:P34284]	-
WBGene00010965	15382.7	8318.71	7648.99	14355	23570.7	22330.5	10450.1	20085.4	-0.942611	0.00476081	0.0417471	ctc-2	MtDNA	9649	10348	+	700	protein_coding	Cytochrome c oxidase subunit 2 [Source:UniProtKB/Swiss-Prot;Acc:P24894]	-
WBGene00009433	760.378	1092.38	1091.65	697.34	464.484	485.767	981.469	549.197	0.837031	0.00476412	0.0417471	F35E12.9	V	13741321	13745127	-	2465	protein_coding	-	-
WBGene00045249	128.781	87.1219	88.1113	168.291	170.627	367.176	101.338	235.365	-1.21445	0.00476453	0.0417471	T07A9.15	IV	393156	393546	-	339	protein_coding	-	-
WBGene00008363	223.474	296.789	458.179	205.483	130.603	112.889	326.147	149.658	1.1221	0.00477013	0.0417742	D1046.2	IV	8924161	8926112	-	1672	protein_coding	-	-
WBGene00005548	3.78769	25.8494	21.3322	1.85957	0	0	16.9898	0.619858	4.68872	0.00483218	0.0422955	sri-36	II	2583782	2585593	-	954	protein_coding	Serpentine Receptor, class I [Source:UniProtKB/TrEMBL;Acc:O44841]	-
WBGene00010368	43.5584	67.0169	61.2142	19.5255	16.852	19.3851	57.2632	18.5875	1.62298	0.00485587	0.0424806	H06A10.1	X	13507564	13510094	+	1139	protein_coding	-	-
WBGene00007978	268.926	457.63	735.498	212.921	241.194	234.901	487.351	229.672	1.08569	0.00486006	0.042495	C36B1.11	I	8755846	8757603	-	1317	protein_coding	-	-
WBGene00022173	403.389	427.951	427.572	737.321	841.548	565.588	419.637	714.819	-0.768709	0.00490345	0.0428432	set-27	III	2700937	2707818	+	2274	protein_coding	SET (Trithorax/polycomb) domain containing [Source:UniProtKB/TrEMBL;Acc:Q9BL48]	-
WBGene00000913	1058.66	1685	2112.82	1006.03	690.933	912.238	1618.82	869.733	0.896209	0.004905	0.0428432	daf-18	IV	419938	425181	-	3410	protein_coding	Phosphatidylinositol 3,4,5-trisphosphate 3-phosphatase and dual-specificity protein phosphatase daf-18 [Source:UniProtKB/Swiss-Prot;Acc:G5EE01]	-
WBGene00014165	4381.41	4201.96	3904.72	7114.73	8070.01	5221.42	4162.7	6802.05	-0.708496	0.00490957	0.0428607	puf-12	II	10100310	10103059	+	2508	protein_coding	Pumilio domain-containing protein 12 [Source:UniProtKB/Swiss-Prot;Acc:Q09622]	-
WBGene00022599	5676.8	6147.36	6393.17	8199.79	9105.36	12182.9	6072.44	9829.36	-0.694773	0.00492988	0.0430155	daf-41	III	5273800	5274787	-	748	protein_coding	Co-chaperone protein daf-41 [Source:UniProtKB/Swiss-Prot;Acc:Q23280]	-
WBGene00013880	556.79	574.43	499.916	841.457	913.169	850.662	543.712	868.429	-0.675583	0.00494113	0.0430912	mppb-1	IV	9074673	9076571	+	1454	protein_coding	Mitochondrial Processing Peptidase Beta [Source:UniProtKB/TrEMBL;Acc:Q23295]	-
WBGene00219288	77.6476	100.525	99.2412	50.2085	27.3845	27.3671	92.4714	34.9867	1.39689	0.00494865	0.0431343	Y87G2A.25	I	13527366	13527963	-	421	protein_coding	-	-
WBGene00010961	853.176	664.424	831.029	2201.73	2069.64	727.51	782.877	1666.29	-1.09001	0.00495138	0.0431356	nduo-2	MtDNA	3389	4269	+	881	protein_coding	NADH-ubiquinone oxidoreductase chain 2 [Source:UniProtKB/Swiss-Prot;Acc:P24889]	-
WBGene00011232	35323	44218.7	38035.3	28099.1	22898.7	12347.1	39192.4	21115	0.89228	0.00495713	0.0431632	pck-2	I	7866136	7872080	+	2640	protein_coding	Phosphoenolypyruvate CarboxyKinase [Source:UniProtKB/TrEMBL;Acc:Q7JKI2]	-
WBGene00006376	73.8599	156.054	172.513	33.4723	45.2898	0	134.142	26.254	2.34895	0.00496274	0.0431895	syp-2	V	5536681	5537713	+	894	protein_coding	-	-
WBGene00004815	17.0446	61.2726	120.573	9.29786	5.26626	25.0866	66.2969	13.2169	2.3347	0.00497327	0.0432567	skr-9	IV	17163554	17164226	+	673	protein_coding	SKR-9; SKp1 Related (Ubiquitin ligase complex component) [Source:UniProtKB/TrEMBL;Acc:G5EFA9]	-
WBGene00004474	57395.8	57272.6	54650.4	74971.5	86465.6	102043	56439.6	87826.7	-0.637948	0.00497563	0.0432567	rps-5	IV	11110102	11111045	-	748	protein_coding	40S ribosomal protein S5 [Source:UniProtKB/Swiss-Prot;Acc:P49041]	-
WBGene00010525	80.4883	48.8266	57.5042	76.2425	163.254	264.549	62.2731	168.015	-1.43003	0.00497869	0.0432608	K03B8.8	V	11409467	11411019	-	755	protein_coding	-	-
WBGene00007525	128.781	126.375	153.035	55.7872	80.0471	34.2089	136.064	56.6811	1.26163	0.00498353	0.0432803	C11G10.1	X	15157359	15158749	-	864	protein_coding	-	-
WBGene00009493	138.251	80.4202	53.7943	39.9808	30.5443	12.5433	90.8217	27.6895	1.70725	0.00499211	0.0433323	hrg-4	IV	11030160	11031082	-	704	protein_coding	Heme transporter hrg-4 [Source:UniProtKB/Swiss-Prot;Acc:Q20106]	-
WBGene00009952	4760.18	5457.09	5551.94	3512.73	3588.43	3211.08	5256.4	3437.41	0.61272	0.00500266	0.0434014	acaa-2	III	13344917	13346866	+	1390	protein_coding	ACetyl-CoA Acyltransferase 2 homolog [Source:UniProtKB/TrEMBL;Acc:O45552]	-
WBGene00019921	12.31	27.7641	12.9848	2.78936	0	0	17.6863	0.929786	4.17168	0.00501621	0.0434964	fbxc-34	II	931171	932327	+	955	protein_coding	F-box C protein [Source:UniProtKB/TrEMBL;Acc:O16774]	-
WBGene00010887	1017.94	972.702	861.636	656.429	570.862	533.659	950.76	586.984	0.695324	0.00504052	0.043675	M7.12	IV	11096724	11097982	-	922	protein_coding	-	-
WBGene00016236	51.1338	65.1021	91.8213	24.1744	13.6923	29.6477	69.3524	22.5048	1.6254	0.00504204	0.043675	heri-1	II	6110452	6113194	-	2165	protein_coding	Heritable Enhancer of RnaI (RNAi) [Source:UniProtKB/TrEMBL;Acc:Q18313]	-
WBGene00202006	8.5223	8.61646	11.1299	0	0	0	9.42287	0	5.62587	0.00504611	0.0436877	C13C4.12	V	12111554	12111714	-	161	ncRNA	-	-
WBGene00015076	982.905	662.51	750.338	263.13	240.141	614.621	798.584	372.63	1.10077	0.00506149	0.0437784	B0238.12	V	5267822	5268823	+	680	protein_coding	-	-
WBGene00044646	23.673	27.7641	35.2445	5.57872	6.31951	0	28.8939	3.96607	2.84623	0.00506183	0.0437784	B0205.14	I	10726903	10727364	+	278	protein_coding	-	-
WBGene00000373	543.533	558.155	665.009	1031.13	953.192	875.749	588.899	953.358	-0.695139	0.00506572	0.0437894	cyp-14A5	V	5421018	5423488	-	1767	protein_coding	CYtochrome P450 family [Source:UniProtKB/TrEMBL;Acc:Q27531]	-
WBGene00012791	127.834	269.025	192.917	103.206	68.4613	14.8239	196.592	62.1638	1.6566	0.00507132	0.0438152	Y43D4A.5	IV	16775827	16785172	+	4773	protein_coding	-	-
WBGene00019471	122.153	200.093	127.066	46.4893	91.6328	43.3313	149.771	60.4845	1.3082	0.00507598	0.0438327	cyp-35B2	V	3942215	3944457	+	1500	protein_coding	CYtochrome P450 family [Source:UniProtKB/TrEMBL;Acc:O44651]	-
WBGene00011981	29.3546	44.997	74.199	17.6659	2.1065	0	49.5169	6.59081	2.88423	0.00510235	0.0440283	T24C2.2	X	14545855	14546720	+	657	protein_coding	-	-
WBGene00016641	206.429	258.494	292.159	395.159	463.43	473.224	252.36	443.938	-0.814437	0.00510389	0.0440283	C44C1.1	X	980776	983030	+	933	protein_coding	-	-
WBGene00013122	163.817	240.303	200.337	92.9786	111.645	30.788	201.486	78.4704	1.35777	0.00511221	0.0440773	impt-1	I	10966394	10970166	-	876	protein_coding	-	-
WBGene00003762	3198.7	2788.86	2561.72	897.244	1349.21	2204.2	2849.76	1483.55	0.942142	0.00512684	0.0441806	nlp-24	V	11616283	11616829	+	471	protein_coding	Neuropeptide-Like Protein [Source:UniProtKB/TrEMBL;Acc:Q20011]	-
WBGene00020620	0	0	0	0	3.15975	39.9104	0	14.3567	-6.3663	0.00513338	0.0442121	T20D4.15	V	3393544	3394744	-	641	protein_coding	-	-
WBGene00006636	927.036	1422.67	1360.62	768.004	741.489	326.125	1236.78	611.872	1.01469	0.00513578	0.0442121	tsp-10	II	6718532	6720294	+	904	protein_coding	TetraSPanin family [Source:UniProtKB/TrEMBL;Acc:B1Q241]	-
WBGene00022783	668.527	458.587	501.771	888.876	897.37	939.605	542.961	908.617	-0.742761	0.00515986	0.0443966	tomm-7	III	7859613	7860159	+	288	protein_coding	Mitochondrial import receptor subunit TOM7 homolog [Source:UniProtKB/Swiss-Prot;Acc:P34660]	-
WBGene00012431	35.0361	67.9743	144.688	23.2447	3.15975	28.5074	82.5661	18.304	2.17444	0.00516687	0.044434	Y11D7A.7	IV	9249523	9250459	+	840	protein_coding	-	-
WBGene00021918	157.189	58.4004	48.2294	109.715	184.319	571.289	87.9396	288.441	-1.71279	0.00517911	0.0445164	Y55D5A.4	III	2988081	2990057	-	798	protein_coding	-	-
WBGene00012059	1135.36	1183.33	1160.29	1616.9	1797.9	2018.33	1159.66	1811.04	-0.642961	0.00520626	0.0447268	T26G10.1	III	9404484	9406641	-	1590	protein_coding	Putative ATP-dependent RNA helicase T26G10.1 [Source:UniProtKB/Swiss-Prot;Acc:P34580]	-
WBGene00044167	54.9215	67.0169	70.4891	26.034	18.9585	22.806	64.1425	22.5995	1.50331	0.00521785	0.0448033	C36A4.11	III	3840595	3841154	+	502	protein_coding	-	-
WBGene00012930	1323.8	1644.79	1703.79	1126.9	898.423	648.829	1557.46	891.385	0.804575	0.00523462	0.0449242	obr-1	III	11257307	11270875	-	3059	protein_coding	Oxysterol-binding protein [Source:UniProtKB/TrEMBL;Acc:A7DTF2]	-
WBGene00019742	356.989	267.11	221.67	127.381	177.999	122.012	281.923	142.464	0.984662	0.00523849	0.0449344	nhr-202	V	462600	464963	+	1353	protein_coding	Nuclear Hormone Receptor family [Source:UniProtKB/TrEMBL;Acc:Q966H8]	Miscellaneous
WBGene00008963	611.711	439.439	363.575	826.58	736.222	945.307	471.575	836.036	-0.826021	0.00524626	0.0449779	F19H8.2	II	14604139	14605697	-	1058	protein_coding	-	-
WBGene00022396	582.357	904.728	842.159	546.714	339.147	166.483	776.414	350.782	1.14497	0.00526607	0.0451246	Y97E10AR.1	V	8001451	8004690	+	2446	protein_coding	-	-
WBGene00021466	3969.5	4189.51	4483.48	6384.84	6871.41	5938.67	4214.16	6398.31	-0.602454	0.00526933	0.0451294	eif-2gamma	I	2313271	2316003	+	1693	protein_coding	Eukaryotic Initiation Factor [Source:UniProtKB/TrEMBL;Acc:Q95XR0]	-
WBGene00200418	2.84077	9.57384	17.6223	0	0	0	10.0123	0	5.71364	0.00530327	0.0453968	C05H8.4	III	5653995	5654130	-	136	ncRNA	-	-
WBGene00021514	835.185	690.274	745.7	887.016	1580.93	1604.4	757.053	1357.45	-0.842108	0.00532105	0.0455104	Y41D4B.11	IV	1605712	1608901	+	1137	protein_coding	-	-
WBGene00022130	181.809	216.369	168.803	86.4701	100.059	103.767	188.993	96.7654	0.966747	0.00532198	0.0455104	Y71F9B.9	I	2759023	2761044	-	1061	protein_coding	-	-
WBGene00003075	25.5669	57.443	32.4621	8.36808	9.47926	0	38.4907	5.94911	2.67894	0.0053276	0.0455352	lrx-1	V	12252623	12255450	+	1318	protein_coding	LRP X(Cross)-hybridizing [Source:UniProtKB/TrEMBL;Acc:Q22179]	-
WBGene00008673	7.57537	4.78692	16.6948	0	0	0	9.68569	0	5.66592	0.00533116	0.0455423	F11A5.5	V	16198379	16201045	+	1188	protein_coding	-	-
WBGene00016632	271.767	314.022	577.825	247.323	153.775	129.994	387.871	177.031	1.13007	0.00533606	0.0455609	C44B7.12	II	6891709	6893639	-	1610	protein_coding	Adenosine deaminase-like protein [Source:UniProtKB/Swiss-Prot;Acc:Q8IG39]	-
WBGene00045397	293.546	361.891	319.983	188.747	200.118	106.048	325.14	164.971	0.977256	0.00534813	0.0456384	Y54G2A.52	IV	2797061	2798573	-	543	protein_coding	-	-
WBGene00018757	1422.28	1362.36	1387.52	1022.77	806.79	777.683	1390.72	869.079	0.677872	0.0053506	0.0456384	tag-304	V	1467744	1471105	+	1360	protein_coding	-	-
WBGene00021491	36.9299	57.443	42.6644	13.9468	9.47926	0	45.6791	7.80869	2.5312	0.00535983	0.0456912	comt-4	V	2049223	2050172	-	796	protein_coding	Catechol-O-MethylTransferase family [Source:UniProtKB/TrEMBL;Acc:Q965W4]	-
WBGene00017342	1557.69	1372.89	1221.5	944.663	876.305	559.886	1384.03	793.618	0.801845	0.00536225	0.0456912	F10D7.5	X	17383125	17391615	-	2682	protein_coding	-	-
WBGene00017580	161.924	69.889	97.3862	158.064	223.289	445.856	109.733	275.736	-1.3281	0.00540643	0.0460442	lgc-4	X	9235103	9242223	-	2278	protein_coding	Ligand-gated ion channel 4 [Source:UniProtKB/Swiss-Prot;Acc:P54245]	-
WBGene00011836	11.3631	19.1477	14.8398	52.9978	53.7158	42.191	15.1168	49.6349	-1.71635	0.00542798	0.0462042	mam-4	V	11248146	11250866	+	2124	protein_coding	MAM (Meprin, A5-protein, PTPmu) domain protein [Source:UniProtKB/TrEMBL;Acc:Q22563]	-
WBGene00001749	4882.33	4380.99	4460.29	6821.84	7171.59	6626.27	4574.54	6873.23	-0.587369	0.0054349	0.0462396	gst-1	III	9059314	9060181	+	766	protein_coding	Glutathione S-transferase P [Source:UniProtKB/Swiss-Prot;Acc:P10299]	-
WBGene00003936	6742.08	5198.59	5656.75	9628.87	12219.8	7546.49	5865.81	9798.39	-0.740232	0.0054453	0.0463044	pat-12	III	727211	752426	-	8267	protein_coding	-	-
WBGene00009897	7.57537	38.2954	15.7673	1.85957	3.15975	0	20.546	1.67311	3.59949	0.00545657	0.0463767	skpo-1	II	8400299	8404848	-	2083	protein_coding	Peroxidase skpo-1 [Source:UniProtKB/Swiss-Prot;Acc:Q20616]	-
WBGene00015501	1520.76	1780.73	1563.74	1177.11	874.198	973.814	1621.74	1008.37	0.685248	0.00546596	0.0464329	C06A5.3	I	5986443	5990581	+	2648	protein_coding	-	-
WBGene00003751	2335.11	2053.59	1414.42	2807.03	2929.09	4969.42	1934.37	3568.51	-0.883366	0.00549286	0.0466377	nlp-13	V	4236418	4238056	+	747	protein_coding	Neuropeptide-Like Protein [Source:UniProtKB/TrEMBL;Acc:O44540]	-
WBGene00000865	722.501	1436.08	2055.31	798.687	655.122	621.462	1404.63	691.757	1.02168	0.00550151	0.0466874	cyb-1	IV	10735259	10737177	+	1648	protein_coding	G2/mitotic-specific cyclin-B1 [Source:UniProtKB/Swiss-Prot;Acc:Q10653]	-
WBGene00022024	2.84077	11.4886	25.0422	0.929786	0	0	13.1238	0.309929	5.14238	0.00550777	0.0467165	Y64H9A.2	X	5043976	5044746	+	610	protein_coding	-	-
WBGene00017937	155.295	232.644	265.261	138.538	24.2248	13.6836	217.734	58.8155	1.88268	0.00551052	0.0467165	F30H5.3	III	505241	512217	-	5362	protein_coding	-	-
WBGene00000970	2209.17	3138.3	3452.11	2092.95	1632.54	1087.84	2933.19	1604.44	0.870128	0.00551817	0.0467576	dhs-6	II	5617122	5619319	-	1454	protein_coding	DeHydrogenases, Short chain [Source:UniProtKB/TrEMBL;Acc:Q09979]	-
WBGene00020790	41.6646	2.87215	22.2597	48.3489	29.491	294.197	22.2655	124.012	-2.47591	0.00552384	0.0467742	T25B6.4	X	9015773	9016799	+	424	protein_coding	-	-
WBGene00017861	372.14	280.513	281.956	141.328	176.946	189.289	311.537	169.188	0.881935	0.00552573	0.0467742	F27D9.2	X	7672993	7676312	+	1682	protein_coding	-	-
WBGene00000908	1146.72	826.222	690.978	1978.59	1932.72	1081	887.974	1664.1	-0.906382	0.00552873	0.046776	daf-12	X	10644409	10666874	+	4108	protein_coding	Nuclear hormone receptor family member daf-12 [Source:UniProtKB/Swiss-Prot;Acc:G5EFF5]	THR-like
WBGene00011097	278.395	280.513	273.609	131.1	106.378	191.57	277.506	143.016	0.957852	0.00553963	0.0468445	nhr-206	V	12092006	12093862	+	1431	protein_coding	Nuclear Hormone Receptor family [Source:UniProtKB/TrEMBL;Acc:Q21803]	ESR-like
WBGene00014700	58.7091	51.6987	80.6914	25.1042	24.2248	10.2627	63.6998	19.8639	1.675	0.00554616	0.046876	C37A5.6	I	14150731	14151041	-	264	protein_coding	-	-
WBGene00020579	5510.14	5290.5	5089.12	3942.29	3248.23	2242.97	5296.59	3144.5	0.752071	0.00555666	0.046941	T19D12.4	II	6631105	6637099	+	3265	protein_coding	-	-
WBGene00012448	55.8684	53.6135	76.054	25.1042	3.15975	0	61.8453	9.42133	2.69454	0.00558269	0.0471371	cyp-33D3	V	18832327	18837214	-	1505	protein_coding	CYtochrome P450 family [Source:UniProtKB/TrEMBL;Acc:G5EE22]	-
WBGene00008315	134.463	86.1646	58.4317	165.502	175.893	318.143	93.0197	219.846	-1.24004	0.0055886	0.0471407	C54G4.5	I	7995738	7996669	+	483	protein_coding	-	-
WBGene00011834	286.917	531.348	671.501	238.955	232.768	273.671	496.589	248.465	0.999348	0.00558876	0.0471407	dvc-1	V	11237438	11239331	-	1366	protein_coding	SprT-like domain-containing protein Spartan [Source:UniProtKB/Swiss-Prot;Acc:Q22557]	-
WBGene00001000	7572.53	5677.29	6304.13	9067.28	10979.1	10698.3	6517.98	10248.2	-0.652852	0.00559276	0.0471506	dim-1	X	8050476	8058220	-	2473	protein_coding	Disorganized muscle protein 1 [Source:UniProtKB/Swiss-Prot;Acc:Q18066]	-
WBGene00020348	471.567	395.4	436.847	577.397	693.039	1198.45	434.604	822.963	-0.920545	0.0055981	0.0471719	mrpl-23	I	6211270	6211885	-	573	protein_coding	Probable 39S ribosomal protein L23, mitochondrial [Source:UniProtKB/Swiss-Prot;Acc:Q9GYS9]	-
WBGene00012968	1148.62	914.302	946.965	640.623	633.004	607.779	1003.29	627.135	0.6778	0.00560128	0.0471749	Y48A6B.7	III	11025234	11026566	-	586	protein_coding	-	-
WBGene00012759	2941.14	2257.51	1961.64	3496.93	4042.38	4109.63	2386.76	3882.98	-0.702076	0.00561115	0.0472342	sup-1	III	11733346	11737627	-	645	protein_coding	-	-
WBGene00016977	7729.72	5715.58	4925.89	14853.3	13469	6676.44	6123.73	11666.3	-0.929898	0.00563277	0.0473823	akap-1	III	6346285	6366660	+	4889	protein_coding	KH domain-containing protein akap-1 [Source:UniProtKB/Swiss-Prot;Acc:Q09285]	-
WBGene00009953	226.314	201.051	243.929	136.679	110.591	51.3134	223.765	99.5278	1.16561	0.00563441	0.0473823	F53A2.9	III	13356610	13359354	-	1568	protein_coding	-	-
WBGene00015940	242.412	269.025	323.693	533.697	481.336	424.191	278.377	479.741	-0.785533	0.00564692	0.0474636	zipt-3	II	5718129	5720052	+	1307	protein_coding	Zrt (ZRT), Irt-(IRT-) like Protein Transporter [Source:UniProtKB/TrEMBL;Acc:Q09957]	-
WBGene00002085	3.78769	9.57384	25.0422	0.929786	0	0	12.8012	0.309929	5.10655	0.00565917	0.0475353	ins-2	II	5988526	5989394	+	545	protein_coding	Probable insulin-like peptide beta-type 2 [Source:UniProtKB/Swiss-Prot;Acc:Q09627]	-
[truncated: 37 more rows]
